# Supplementary material for: Country-specific estimates of unintended pregnancy and abortion incidence: a global comparative analysis of levels in 2015–2019
Source: PubMed Central journal article supplement — BMJ Glob Health. 2022 Mar 23;7(3):e007151. doi: 10.1136/bmjgh-2021-007151 (PMC8943721; doi:10.1136/bmjgh-2021-007151), 2022-03-23
Supplement: bmjgh-2021-007151supp002.pdf [file bmjgh-2021-007151supp002.pdf]

## Appendix D. Plots of data with corresponding model-based estimates

### Contents

|          |                           |          |
|----------|---------------------------|----------|
| <b>1</b> | <b>Sub-Saharan Africa</b> | <b>5</b> |
| 1.1      | Eastern Africa            | 5        |
| 1.1.1    | Burundi                   | 6        |
| 1.1.2    | Comoros                   | 7        |
| 1.1.3    | Djibouti                  | 8        |
| 1.1.4    | Eritrea                   | 9        |
| 1.1.5    | Ethiopia                  | 10       |
| 1.1.6    | Kenya                     | 11       |
| 1.1.7    | Madagascar                | 12       |
| 1.1.8    | Malawi                    | 13       |
| 1.1.9    | Mayotte                   | 14       |
| 1.1.10   | Mozambique                | 15       |
| 1.1.11   | Rwanda                    | 16       |
| 1.1.12   | Réunion                   | 17       |
| 1.1.13   | Somalia                   | 18       |
| 1.1.14   | South Sudan               | 19       |
| 1.1.15   | Tanzania                  | 20       |
| 1.1.16   | Uganda                    | 21       |
| 1.1.17   | Zambia                    | 22       |
| 1.1.18   | Zimbabwe                  | 23       |
| 1.2      | Western Africa            | 24       |
| 1.2.1    | Benin                     | 25       |
| 1.2.2    | Burkina Faso              | 26       |
| 1.2.3    | Cabo Verde                | 27       |
| 1.2.4    | Côte d'Ivoire             | 28       |
| 1.2.5    | Gambia                    | 29       |
| 1.2.6    | Ghana                     | 30       |
| 1.2.7    | Guinea                    | 31       |
| 1.2.8    | Guinea-Bissau             | 32       |
| 1.2.9    | Liberia                   | 33       |
| 1.2.10   | Mali                      | 34       |
| 1.2.11   | Mauritania                | 35       |
| 1.2.12   | Niger                     | 36       |
| 1.2.13   | Nigeria                   | 37       |
| 1.2.14   | Senegal                   | 38       |
| 1.2.15   | Sierra Leone              | 39       |
| 1.2.16   | Togo                      | 40       |
| 1.3      | Middle Africa             | 41       |
| 1.3.1    | Angola                    | 42       |
| 1.3.2    | Cameroon                  | 43       |
| 1.3.3    | Central African Republic  | 44       |
| 1.3.4    | Chad                      | 45       |
| 1.3.5    | Congo                     | 46       |

|          |                                        |           |
|----------|----------------------------------------|-----------|
| 1.3.6    | DR Congo . . . . .                     | 47        |
| 1.3.7    | Gabon . . . . .                        | 48        |
| 1.3.8    | Sao Tome and Principe . . . . .        | 49        |
| 1.4      | Southern Africa . . . . .              | 50        |
| 1.4.1    | Botswana . . . . .                     | 51        |
| 1.4.2    | Eswatini . . . . .                     | 52        |
| 1.4.3    | Lesotho . . . . .                      | 53        |
| 1.4.4    | Namibia . . . . .                      | 54        |
| 1.4.5    | South Africa . . . . .                 | 55        |
| <b>2</b> | <b>Western Asia</b>                    | <b>56</b> |
| 2.1      | Armenia . . . . .                      | 57        |
| 2.2      | Azerbaijan . . . . .                   | 58        |
| 2.3      | Georgia . . . . .                      | 59        |
| <b>3</b> | <b>Central and Southern Asia</b>       | <b>60</b> |
| 3.1      | Central Asia . . . . .                 | 60        |
| 3.1.1    | Kazakhstan . . . . .                   | 61        |
| 3.1.2    | Kyrgyzstan . . . . .                   | 62        |
| 3.1.3    | Tajikistan . . . . .                   | 63        |
| 3.1.4    | Turkmenistan . . . . .                 | 64        |
| 3.1.5    | Uzbekistan . . . . .                   | 65        |
| 3.2      | Southern Asia . . . . .                | 66        |
| 3.2.1    | Bangladesh . . . . .                   | 67        |
| 3.2.2    | Bhutan . . . . .                       | 68        |
| 3.2.3    | India . . . . .                        | 69        |
| 3.2.4    | Maldives . . . . .                     | 70        |
| 3.2.5    | Nepal . . . . .                        | 71        |
| 3.2.6    | Pakistan . . . . .                     | 72        |
| 3.2.7    | Sri Lanka . . . . .                    | 73        |
| <b>4</b> | <b>Eastern and Southeastern Asia</b>   | <b>74</b> |
| 4.1      | Eastern Asia . . . . .                 | 74        |
| 4.1.1    | China . . . . .                        | 75        |
| 4.1.2    | Hong Kong . . . . .                    | 76        |
| 4.1.3    | Japan . . . . .                        | 77        |
| 4.1.4    | Mongolia . . . . .                     | 78        |
| 4.1.5    | South Korea . . . . .                  | 79        |
| 4.2      | South-Eastern Asia . . . . .           | 80        |
| 4.2.1    | Cambodia . . . . .                     | 81        |
| 4.2.2    | Indonesia . . . . .                    | 82        |
| 4.2.3    | Laos . . . . .                         | 83        |
| 4.2.4    | Myanmar . . . . .                      | 84        |
| 4.2.5    | Philippines . . . . .                  | 85        |
| 4.2.6    | Singapore . . . . .                    | 86        |
| 4.2.7    | Thailand . . . . .                     | 87        |
| 4.2.8    | Timor-Leste . . . . .                  | 88        |
| 4.2.9    | Viet Nam . . . . .                     | 89        |
| <b>5</b> | <b>Latin America and the Caribbean</b> | <b>90</b> |
| 5.1      | South America . . . . .                | 90        |
| 5.1.1    | Argentina . . . . .                    | 91        |
| 5.1.2    | Bolivia . . . . .                      | 92        |
| 5.1.3    | Brazil . . . . .                       | 93        |
| 5.1.4    | Chile . . . . .                        | 94        |

|          |                                    |            |
|----------|------------------------------------|------------|
| 5.1.5    | Colombia                           | 95         |
| 5.1.6    | Ecuador                            | 96         |
| 5.1.7    | French Guiana                      | 97         |
| 5.1.8    | Guyana                             | 98         |
| 5.1.9    | Paraguay                           | 99         |
| 5.1.10   | Peru                               | 100        |
| 5.1.11   | Suriname                           | 101        |
| 5.1.12   | Uruguay                            | 102        |
| 5.2      | Central America                    | 103        |
| 5.2.1    | Belize                             | 104        |
| 5.2.2    | Costa Rica                         | 105        |
| 5.2.3    | El Salvador                        | 106        |
| 5.2.4    | Guatemala                          | 107        |
| 5.2.5    | Honduras                           | 108        |
| 5.2.6    | Mexico                             | 109        |
| 5.2.7    | Nicaragua                          | 110        |
| 5.2.8    | Panama                             | 111        |
| 5.3      | Caribbean                          | 112        |
| 5.3.1    | Barbados                           | 113        |
| 5.3.2    | Cuba                               | 114        |
| 5.3.3    | Dominican Republic                 | 115        |
| 5.3.4    | Guadeloupe                         | 116        |
| 5.3.5    | Haiti                              | 117        |
| 5.3.6    | Jamaica                            | 118        |
| 5.3.7    | Martinique                         | 119        |
| 5.3.8    | Puerto Rico                        | 120        |
| 5.3.9    | Saint Lucia                        | 121        |
| 5.3.10   | Trinidad and Tobago                | 122        |
| <b>6</b> | <b>Oceania</b>                     | <b>123</b> |
| 6.1      | Australia                          | 124        |
| 6.2      | New Zealand                        | 125        |
| 6.3      | Papua New Guinea                   | 126        |
| 6.4      | Samoa                              | 127        |
| 6.5      | Solomon Islands                    | 128        |
| 6.6      | Vanuatu                            | 129        |
| <b>7</b> | <b>Europe and Northern America</b> | <b>130</b> |
| 7.1      | Eastern Europe                     | 130        |
| 7.1.1    | Belarus                            | 131        |
| 7.1.2    | Bulgaria                           | 132        |
| 7.1.3    | Czechia                            | 133        |
| 7.1.4    | Hungary                            | 134        |
| 7.1.5    | Moldova                            | 135        |
| 7.1.6    | Poland                             | 136        |
| 7.1.7    | Romania                            | 137        |
| 7.1.8    | Russia                             | 138        |
| 7.1.9    | Slovakia                           | 139        |
| 7.1.10   | Ukraine                            | 140        |
| 7.2      | Northern Europe                    | 141        |
| 7.2.1    | Denmark                            | 142        |
| 7.2.2    | Estonia                            | 143        |
| 7.2.3    | Finland                            | 144        |
| 7.2.4    | Iceland                            | 145        |
| 7.2.5    | Latvia                             | 146        |

|        |                                  |     |
|--------|----------------------------------|-----|
| 7.2.6  | Lithuania . . . . .              | 147 |
| 7.2.7  | Norway . . . . .                 | 148 |
| 7.2.8  | Sweden . . . . .                 | 149 |
| 7.2.9  | United Kingdom . . . . .         | 150 |
| 7.3    | Southern Europe . . . . .        | 151 |
| 7.3.1  | Albania . . . . .                | 152 |
| 7.3.2  | Bosnia and Herzegovina . . . . . | 153 |
| 7.3.3  | Croatia . . . . .                | 154 |
| 7.3.4  | Greece . . . . .                 | 155 |
| 7.3.5  | Italy . . . . .                  | 156 |
| 7.3.6  | Montenegro . . . . .             | 157 |
| 7.3.7  | North Macedonia . . . . .        | 158 |
| 7.3.8  | Portugal . . . . .               | 159 |
| 7.3.9  | Serbia . . . . .                 | 160 |
| 7.3.10 | Slovenia . . . . .               | 161 |
| 7.3.11 | Spain . . . . .                  | 162 |
| 7.4    | Western Europe . . . . .         | 163 |
| 7.4.1  | Belgium . . . . .                | 164 |
| 7.4.2  | France . . . . .                 | 165 |
| 7.4.3  | Germany . . . . .                | 166 |
| 7.4.4  | Netherlands . . . . .            | 167 |
| 7.4.5  | Switzerland . . . . .            | 168 |
| 7.5    | Northern America . . . . .       | 169 |
| 7.5.1  | Canada . . . . .                 | 170 |
| 7.5.2  | United States . . . . .          | 171 |

## **1 Sub-Saharan Africa**

### **1.1 Eastern Africa**

### Burundi

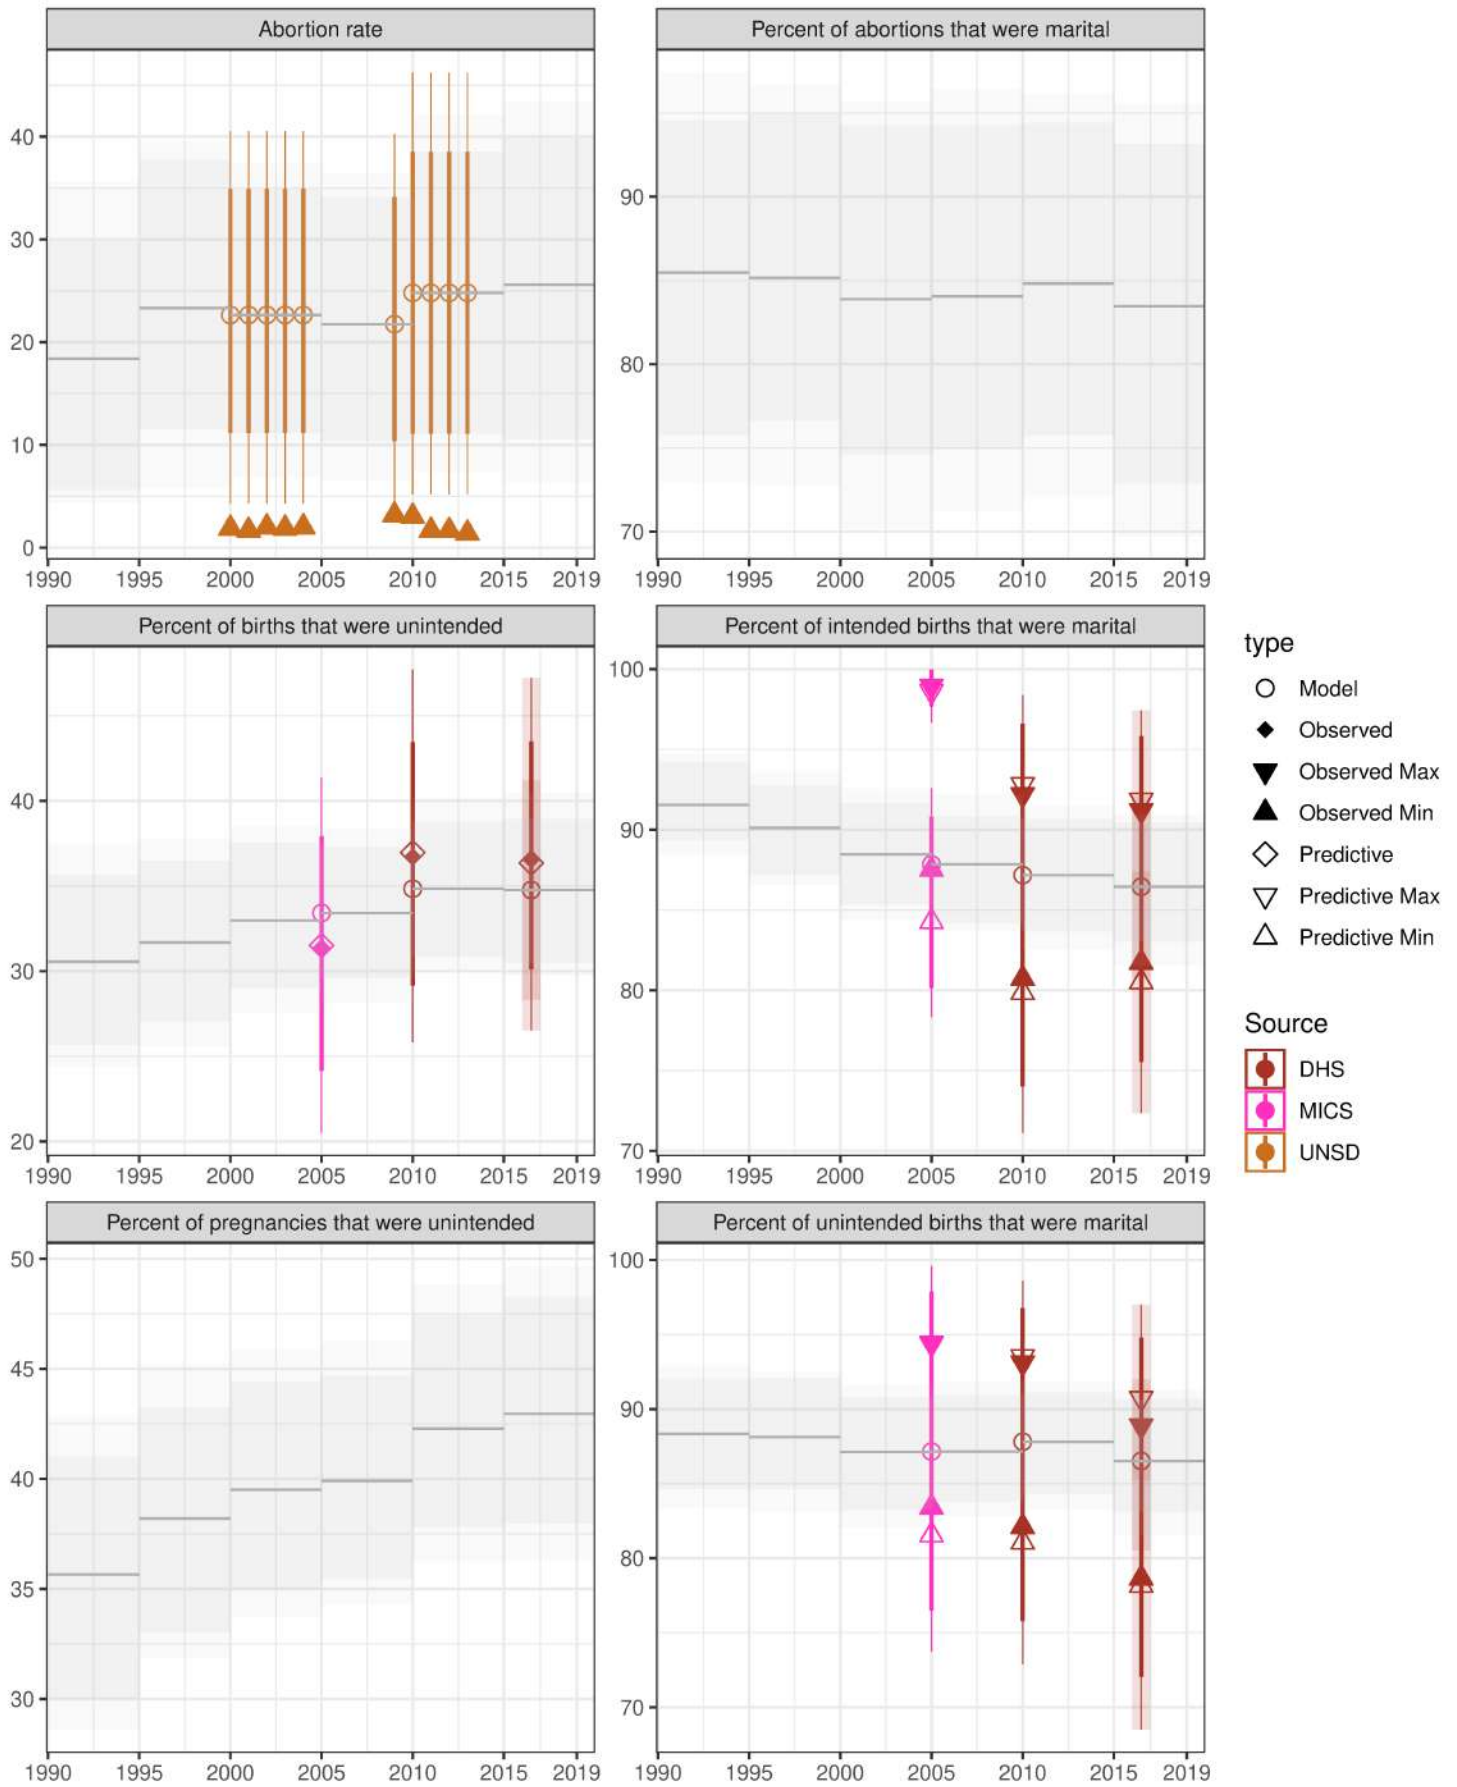

Note: Vertical lines and grey shading show 80% and 95% uncertainty intervals. Color shading shows when data were collected, if more than one year.

### Comoros

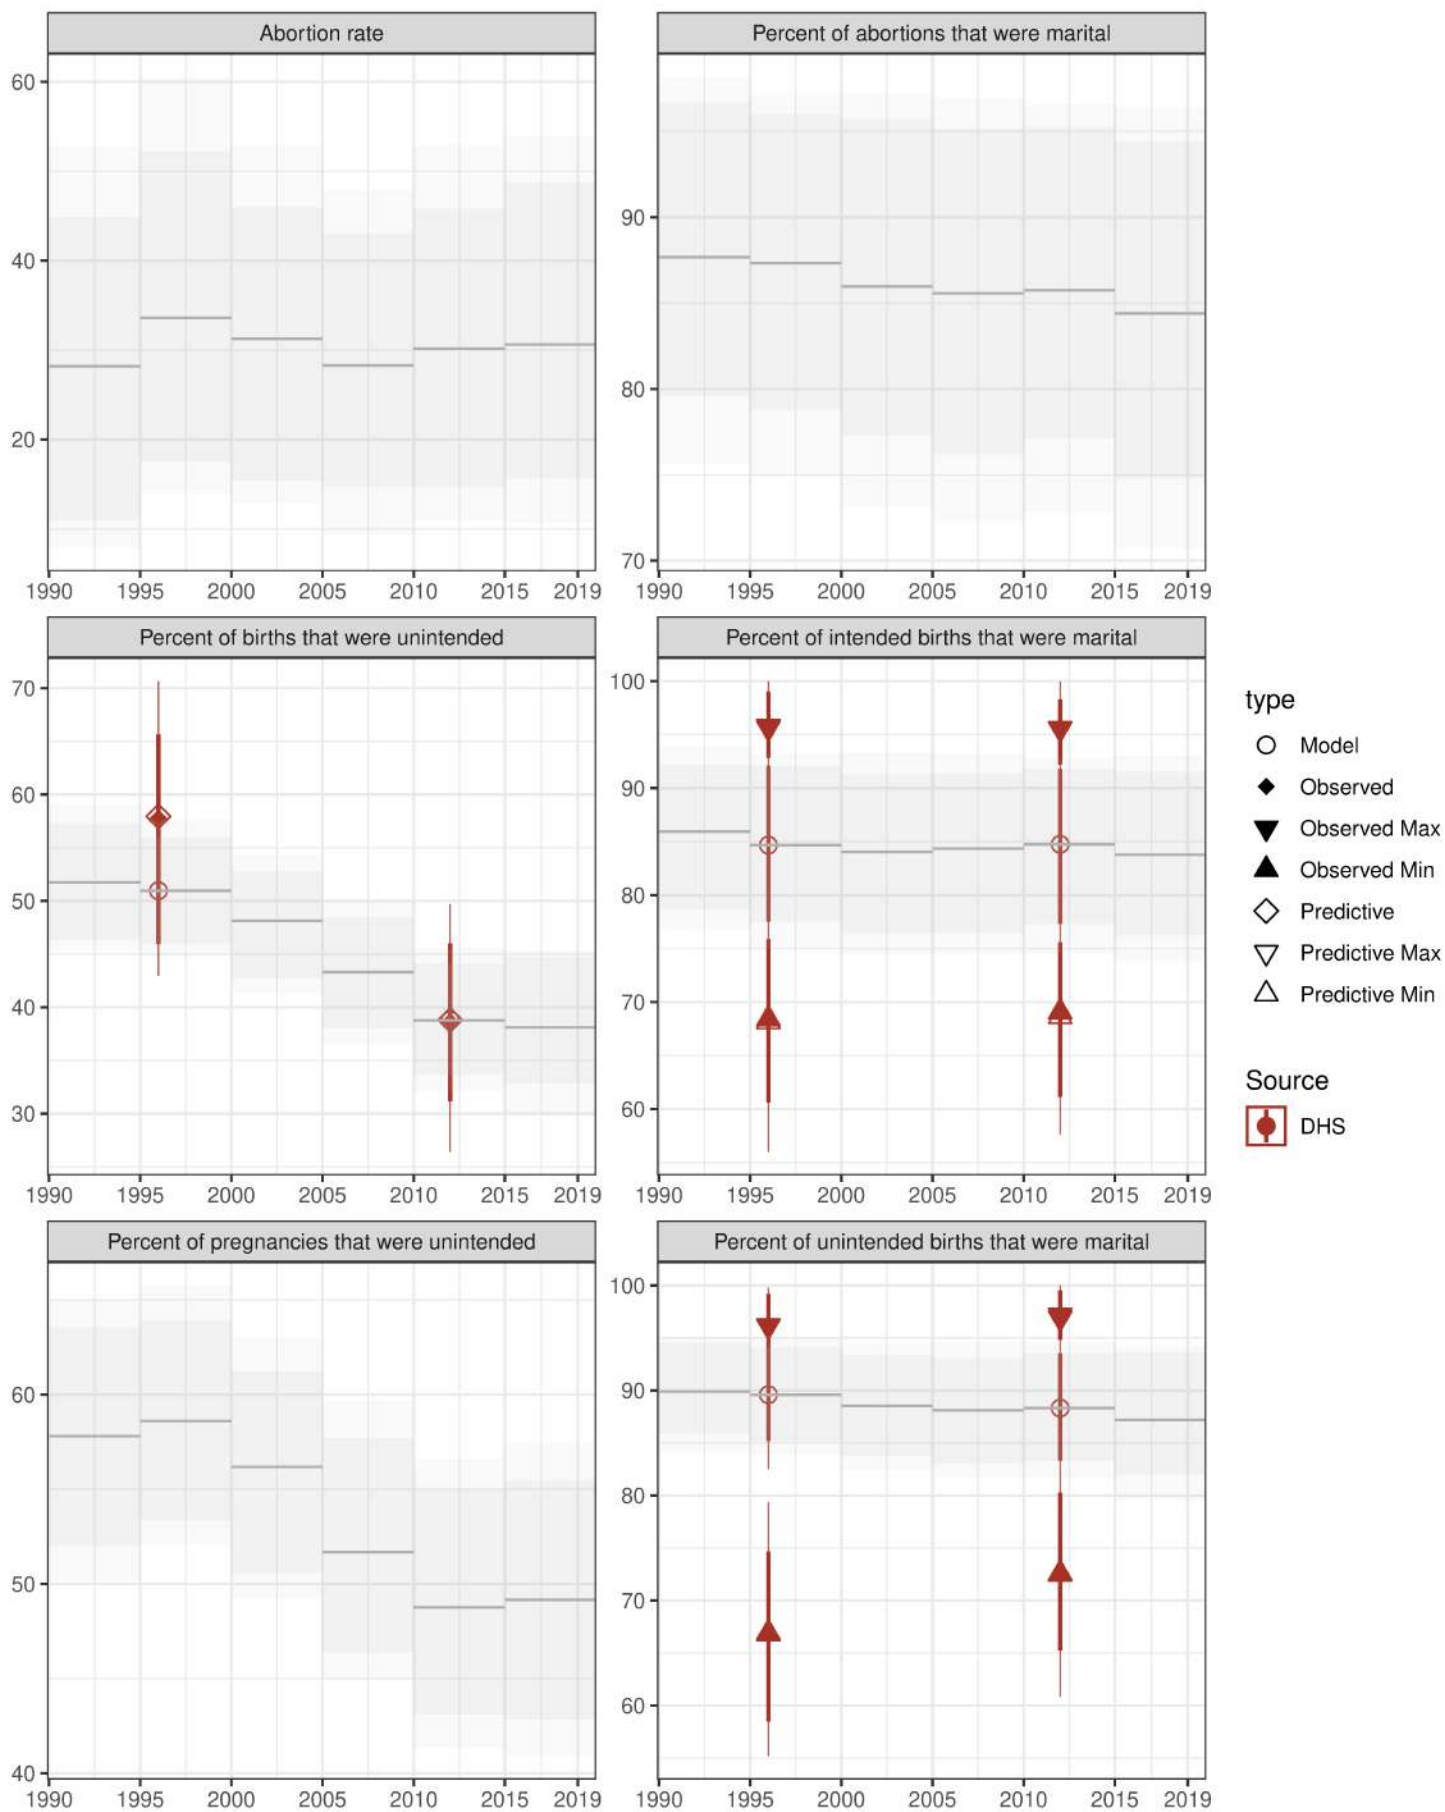

Note: Vertical lines and grey shading show 80% and 95% uncertainty intervals.

### Djibouti

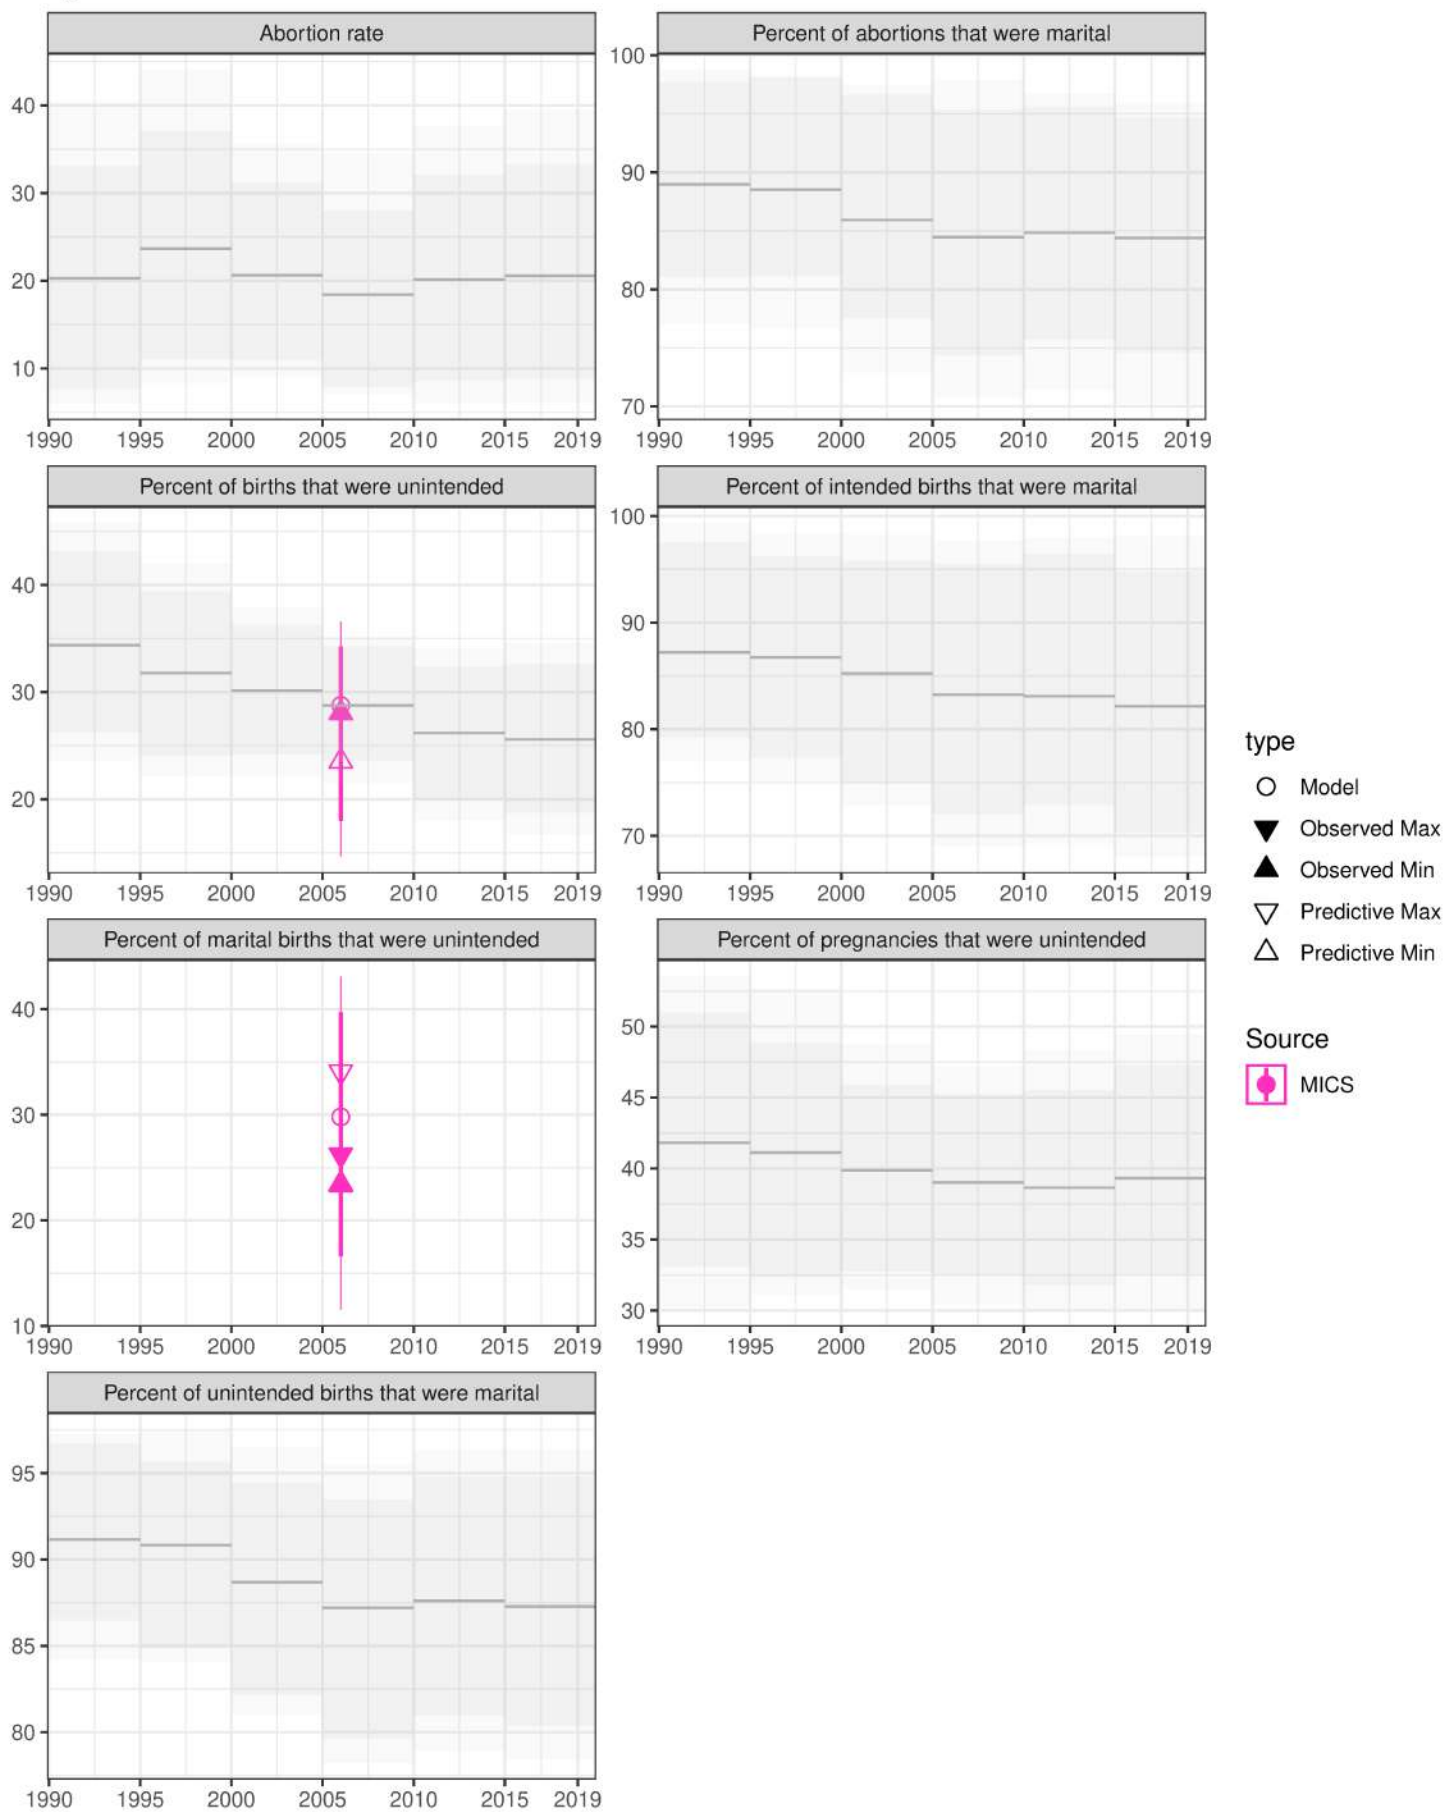

Note: Vertical lines and grey shading show 80% and 95% uncertainty intervals.



### Eritrea

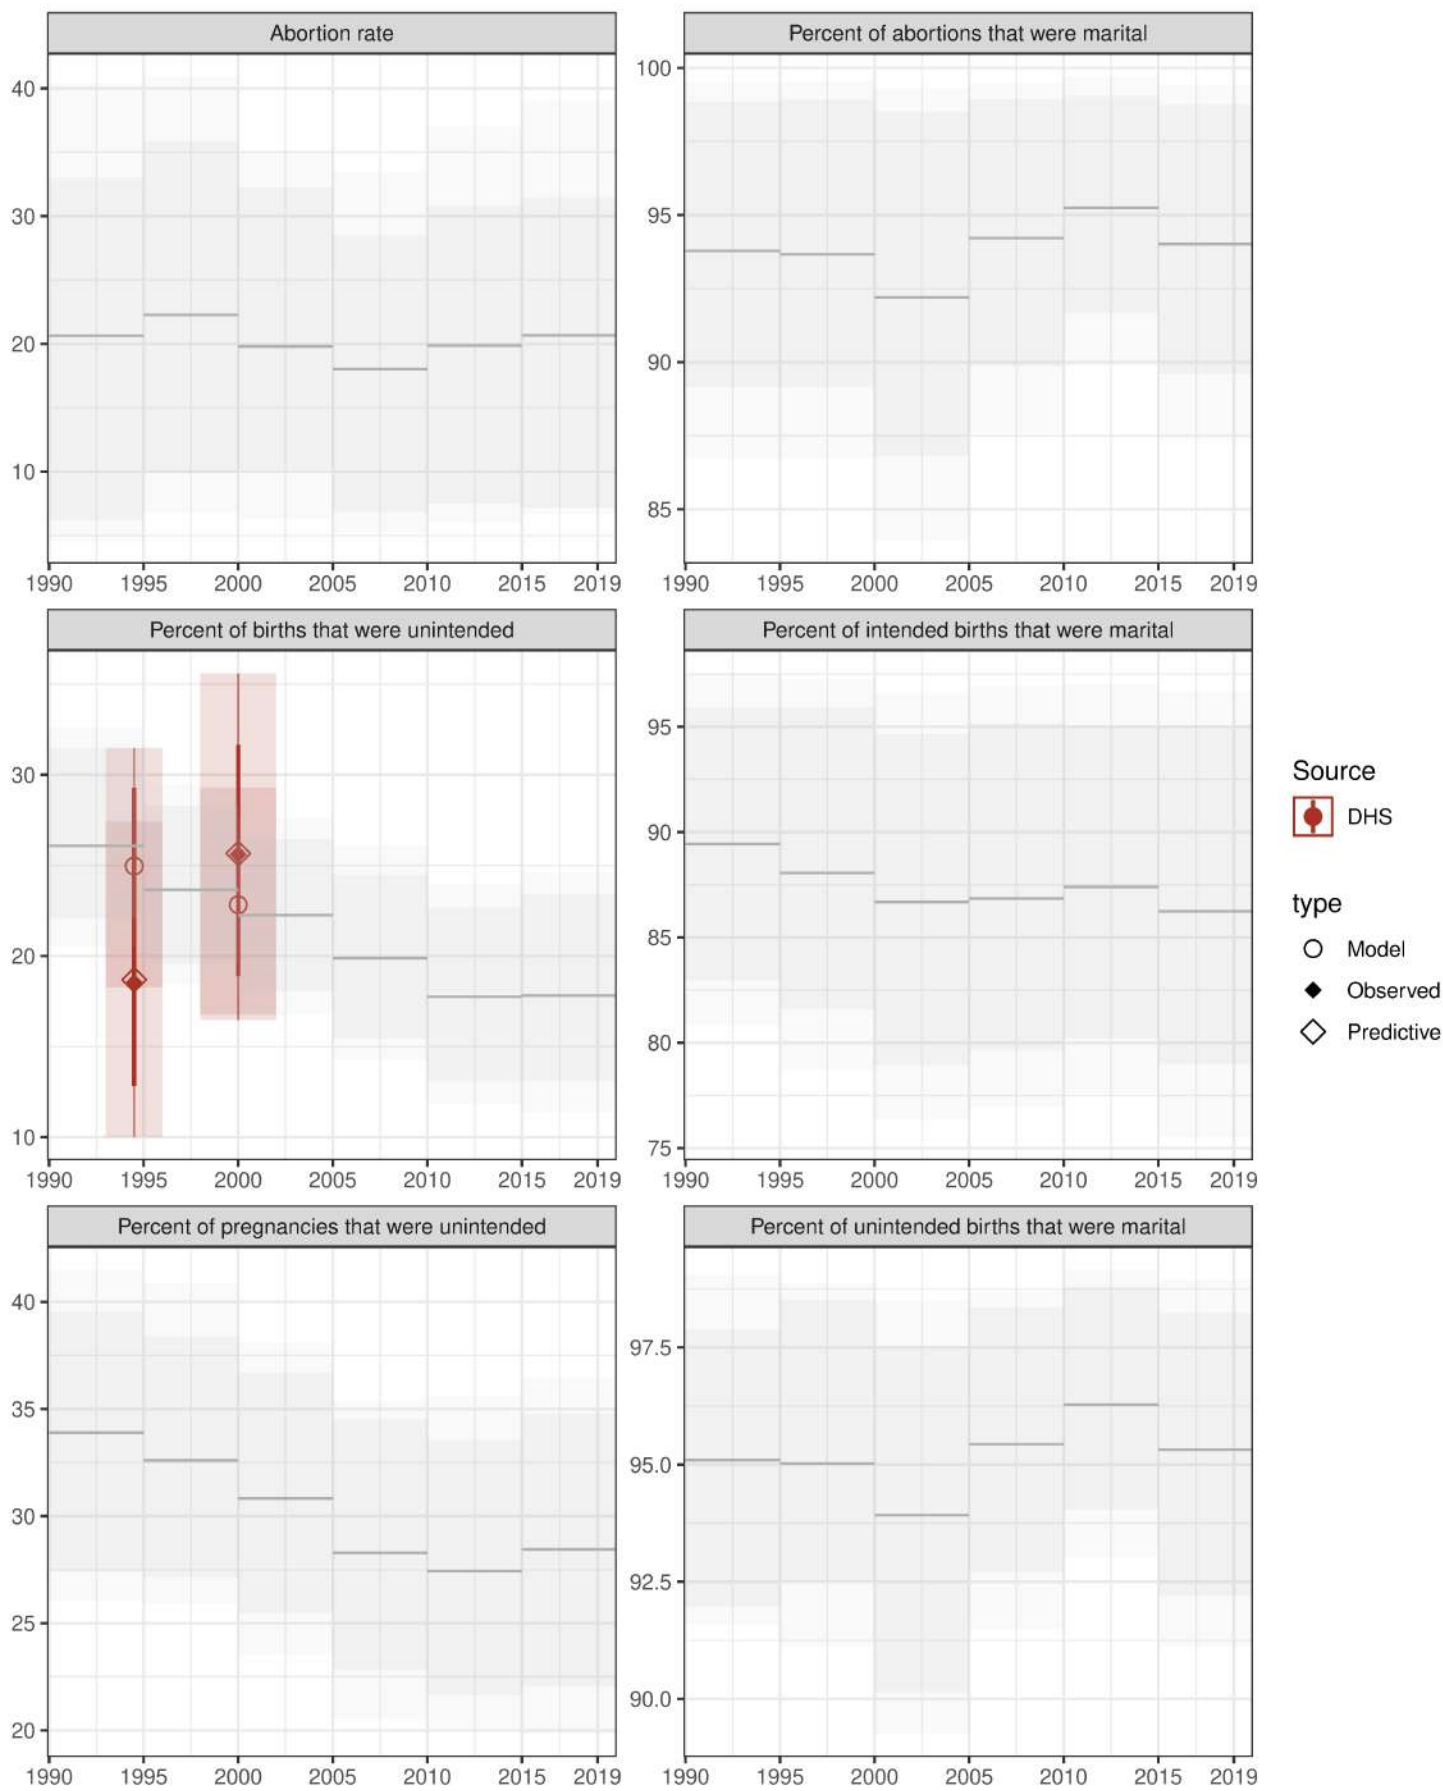

Note: Vertical lines and grey shading show 80% and 95% uncertainty intervals. Color shading shows when data were collected, if more than one year.

### Ethiopia

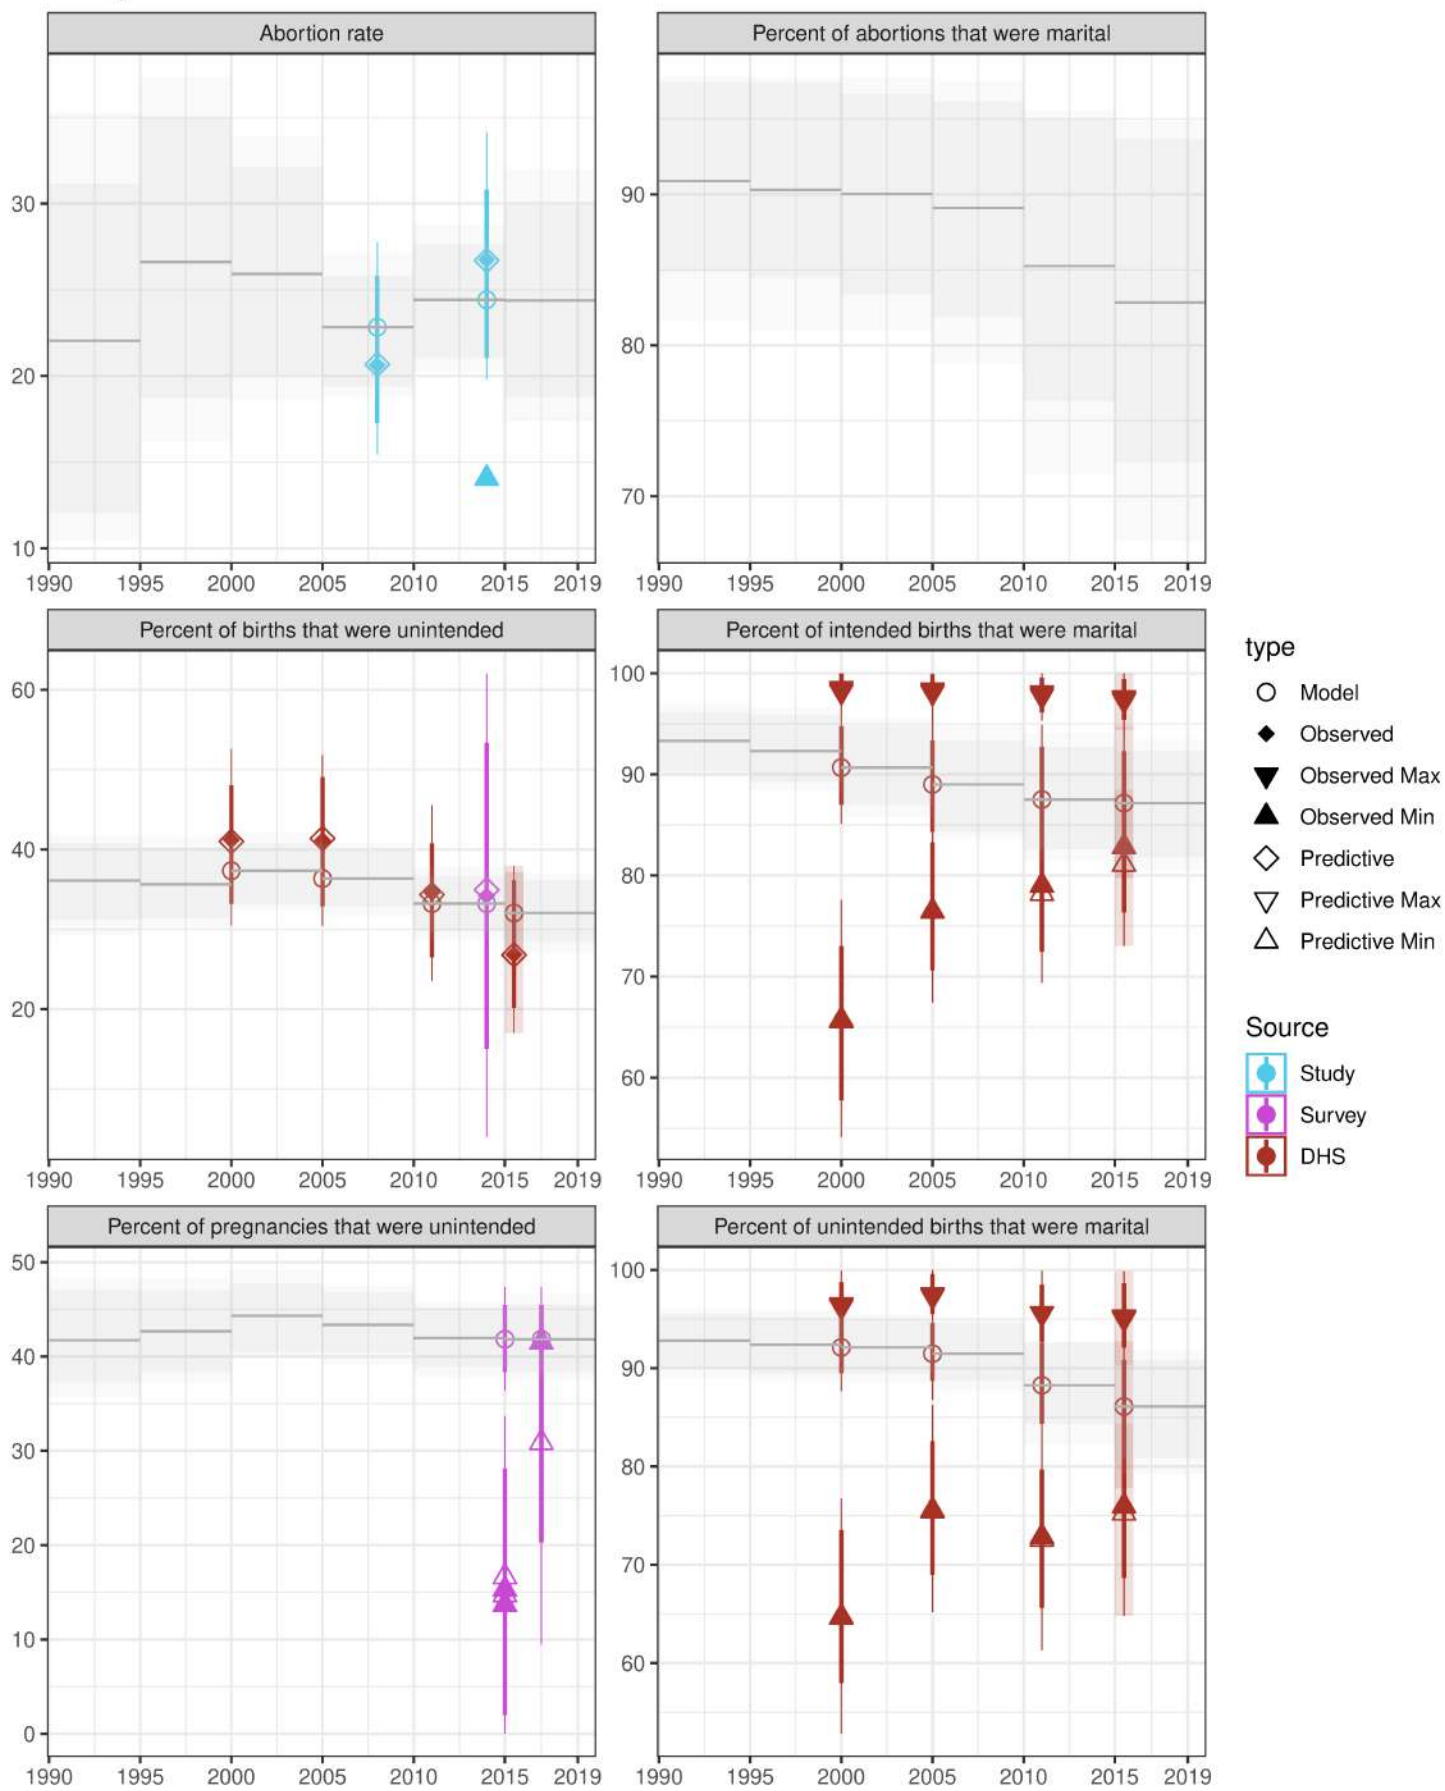

Note: Vertical lines and grey shading show 80% and 95% uncertainty intervals. Color shading shows when data were collected, if more than one year.

### Kenya

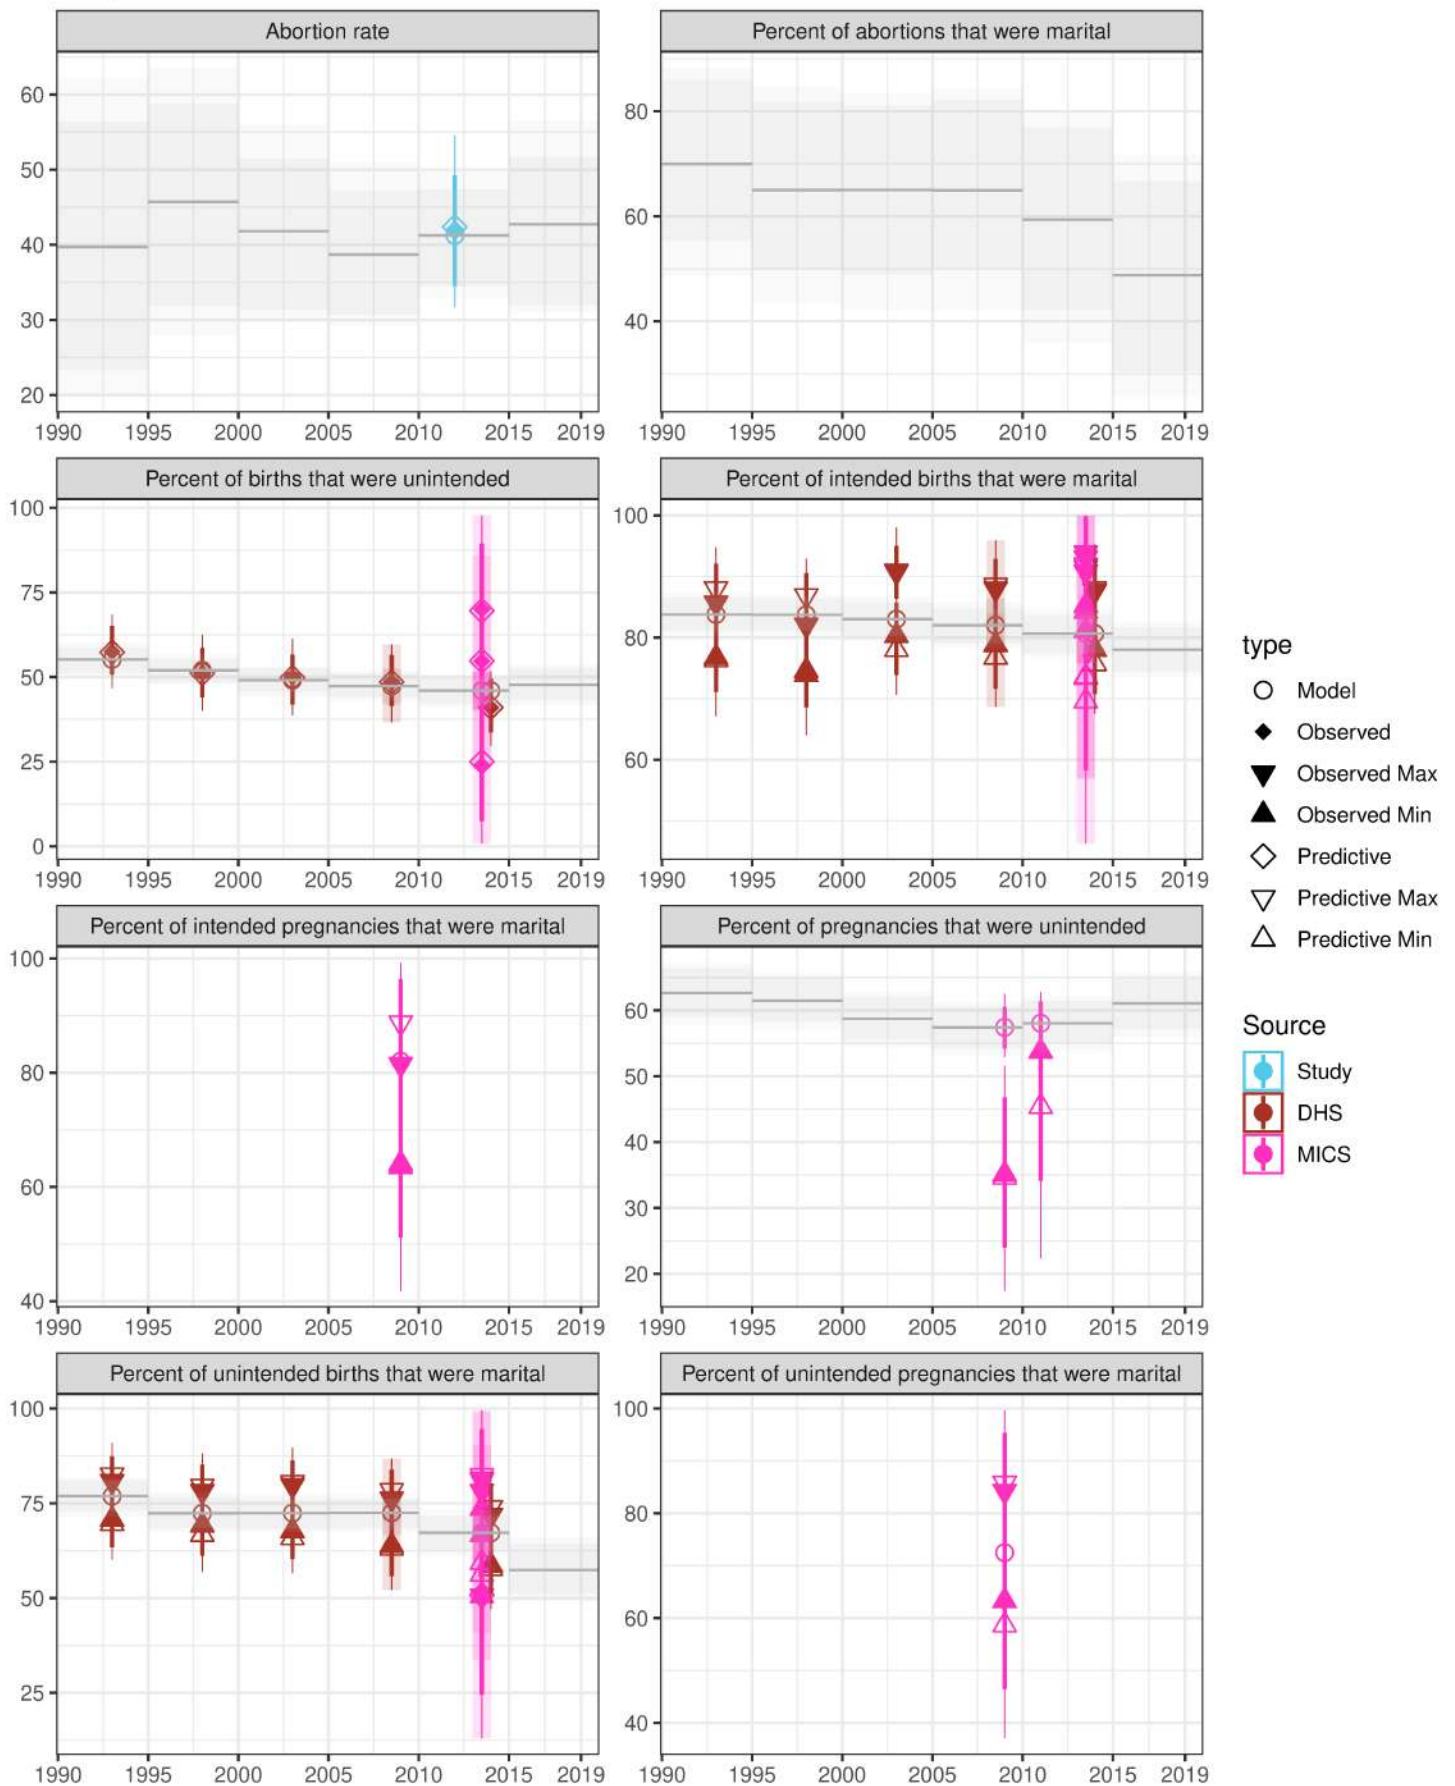

Note: Vertical lines and grey shading show 80% and 95% uncertainty intervals. Color shading shows when data were collected, if more than one year.

# Madagascar

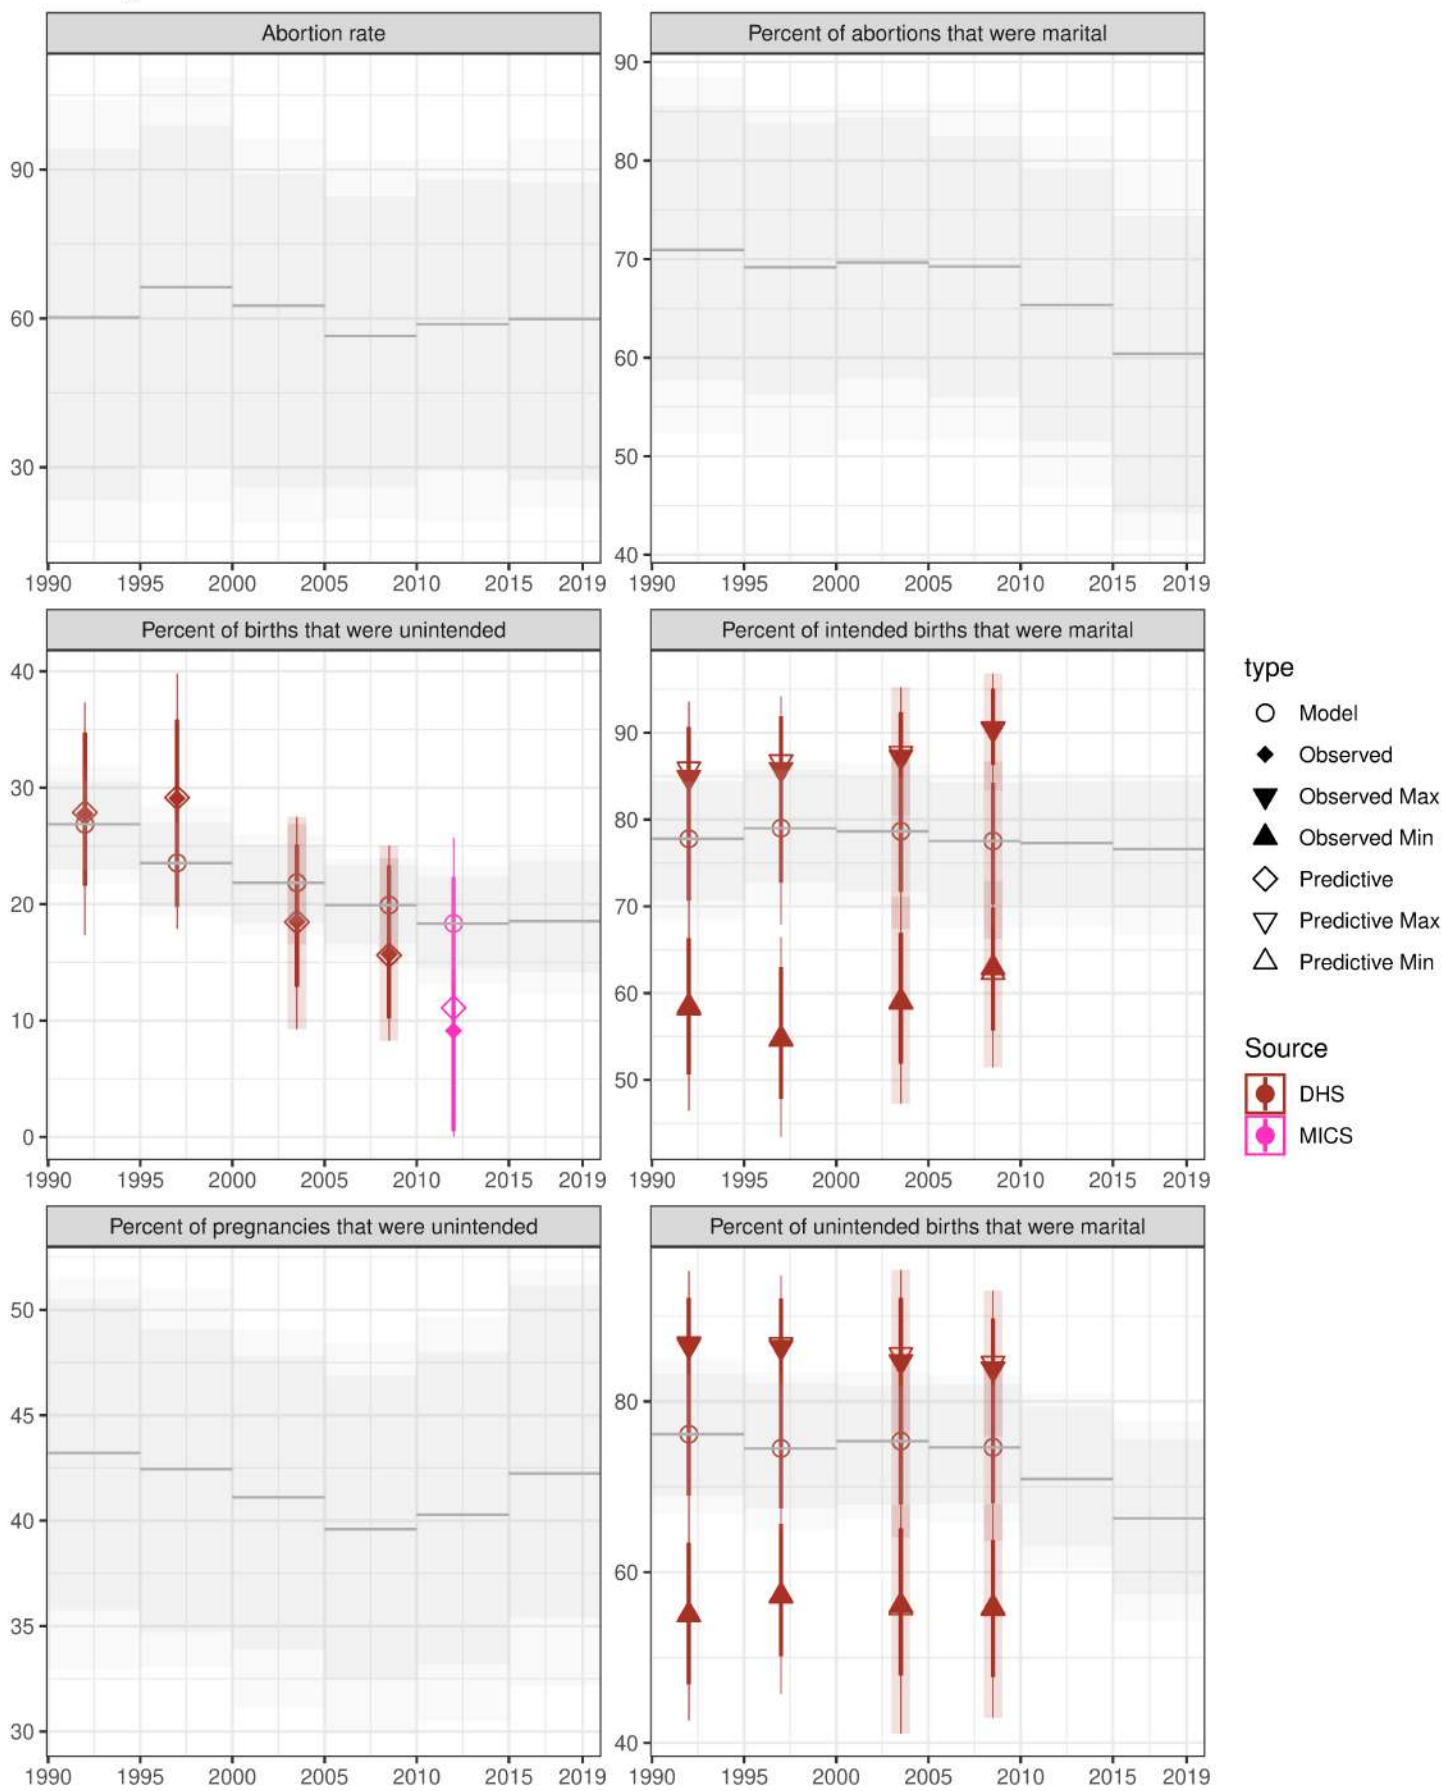

Note: Vertical lines and grey shading show 80% and 95% uncertainty intervals. Color shading shows when data were collected, if more than one year.

### Malawi

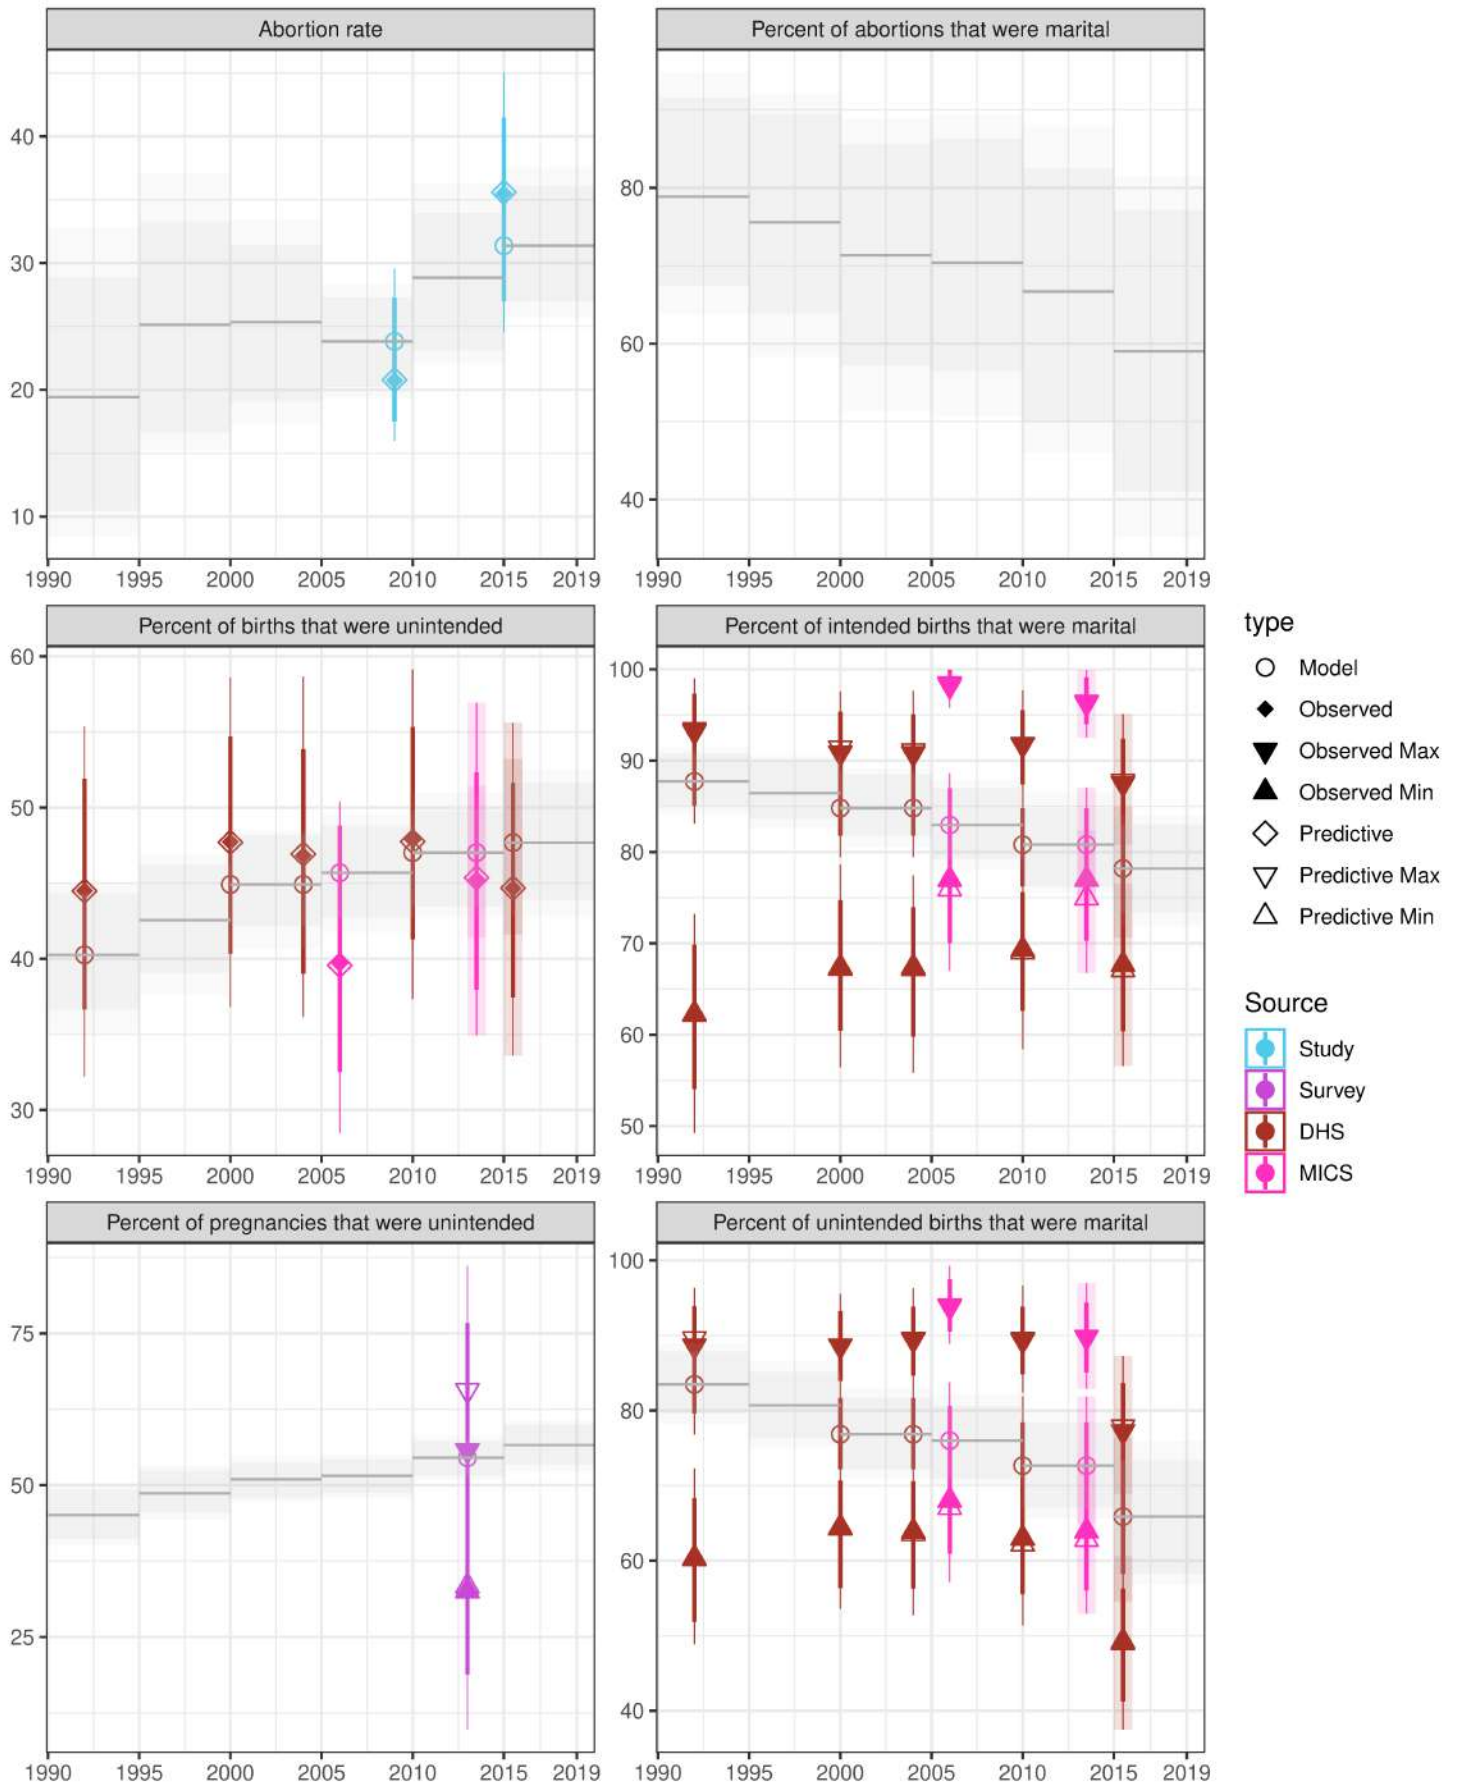

Note: Vertical lines and grey shading show 80% and 95% uncertainty intervals. Color shading shows when data were collected, if more than one year.

### Mayotte

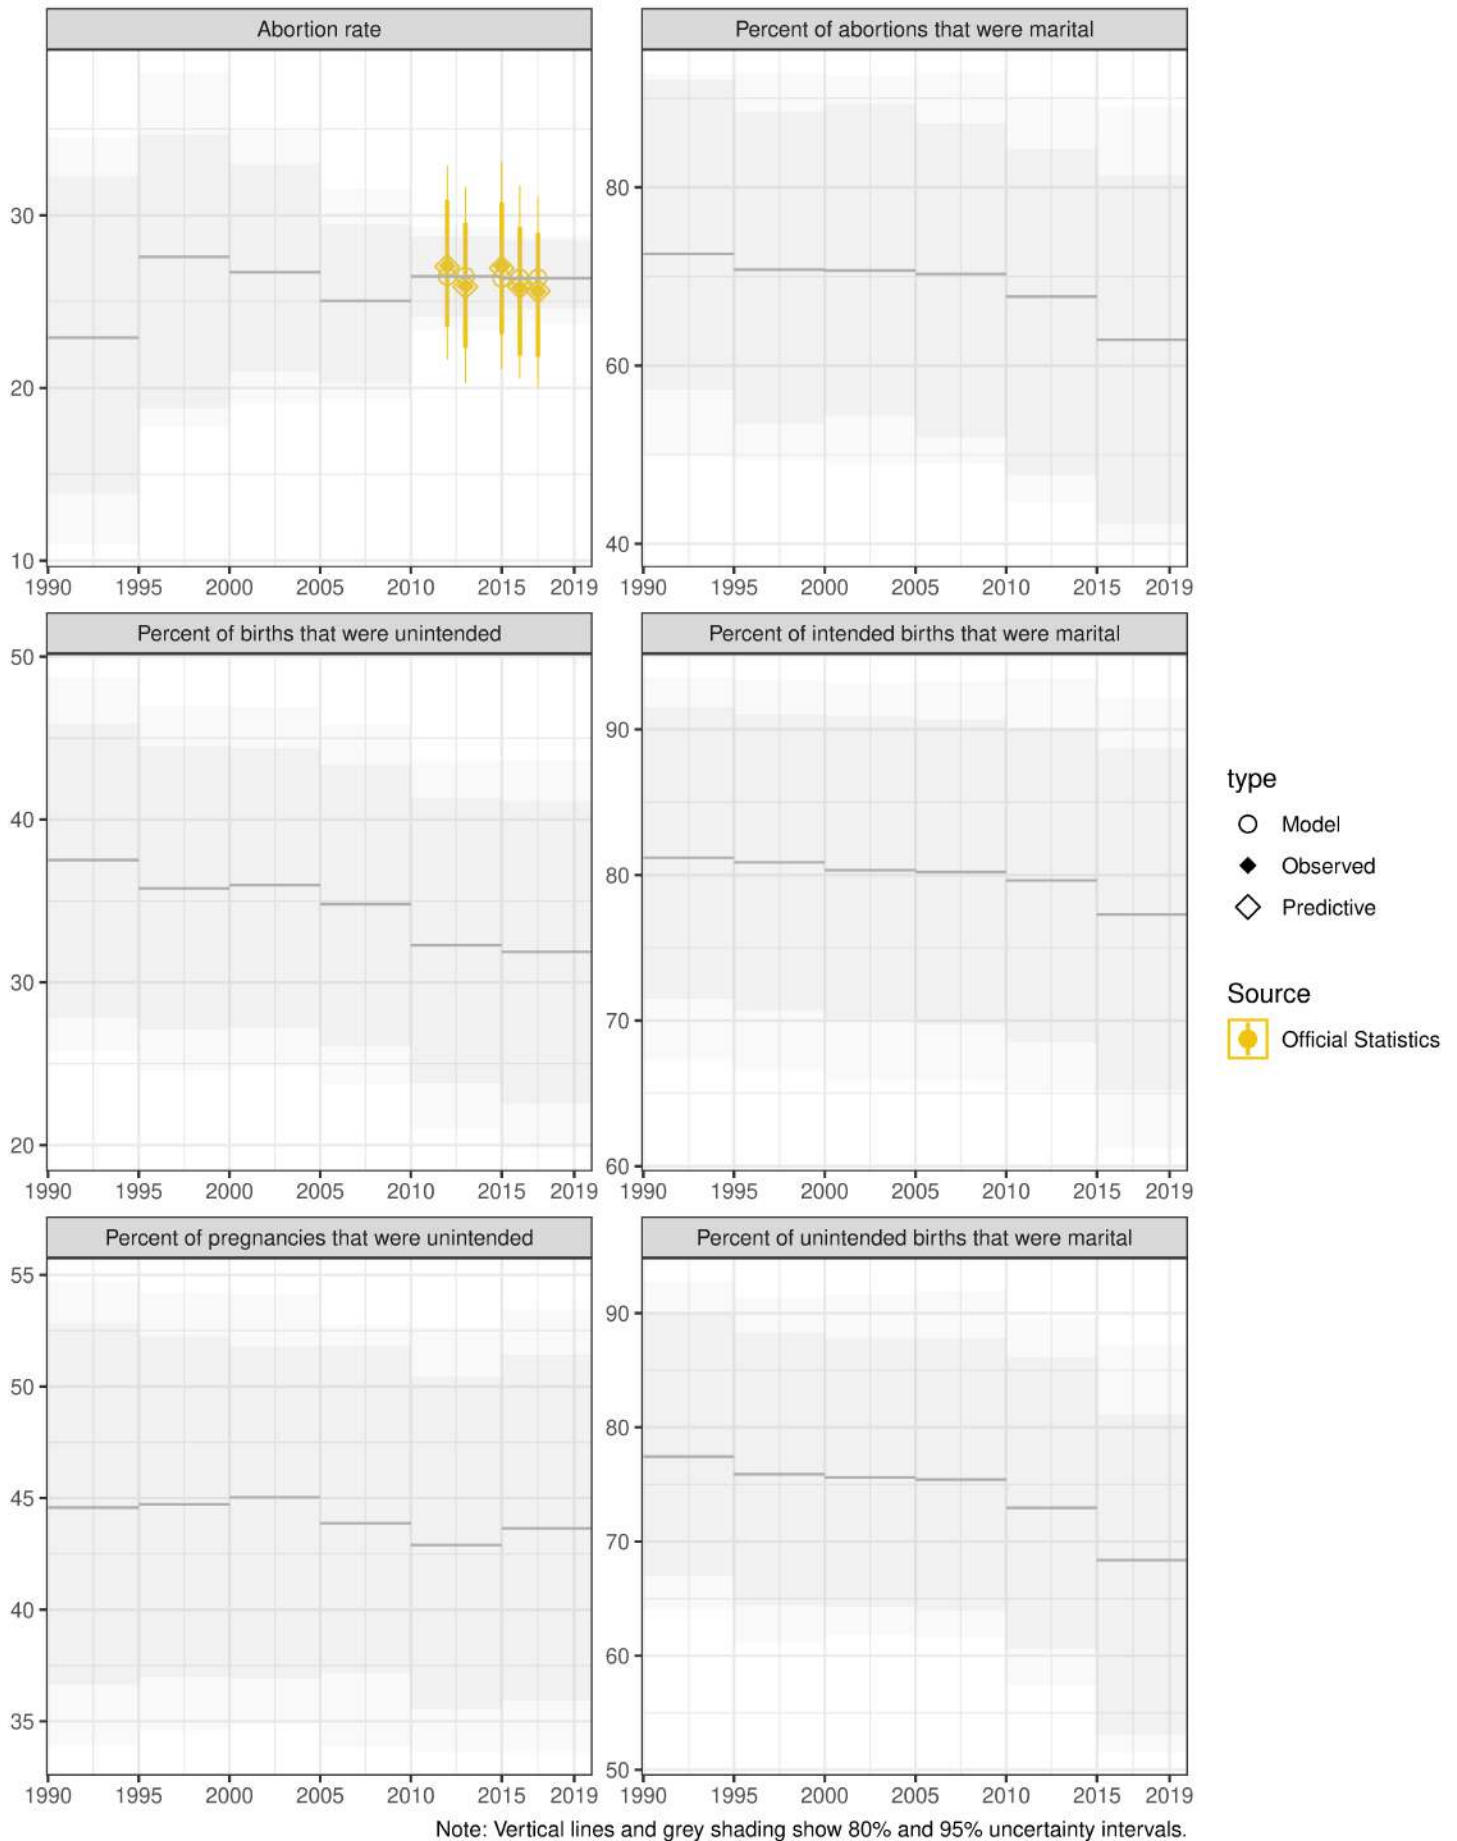

### Mozambique

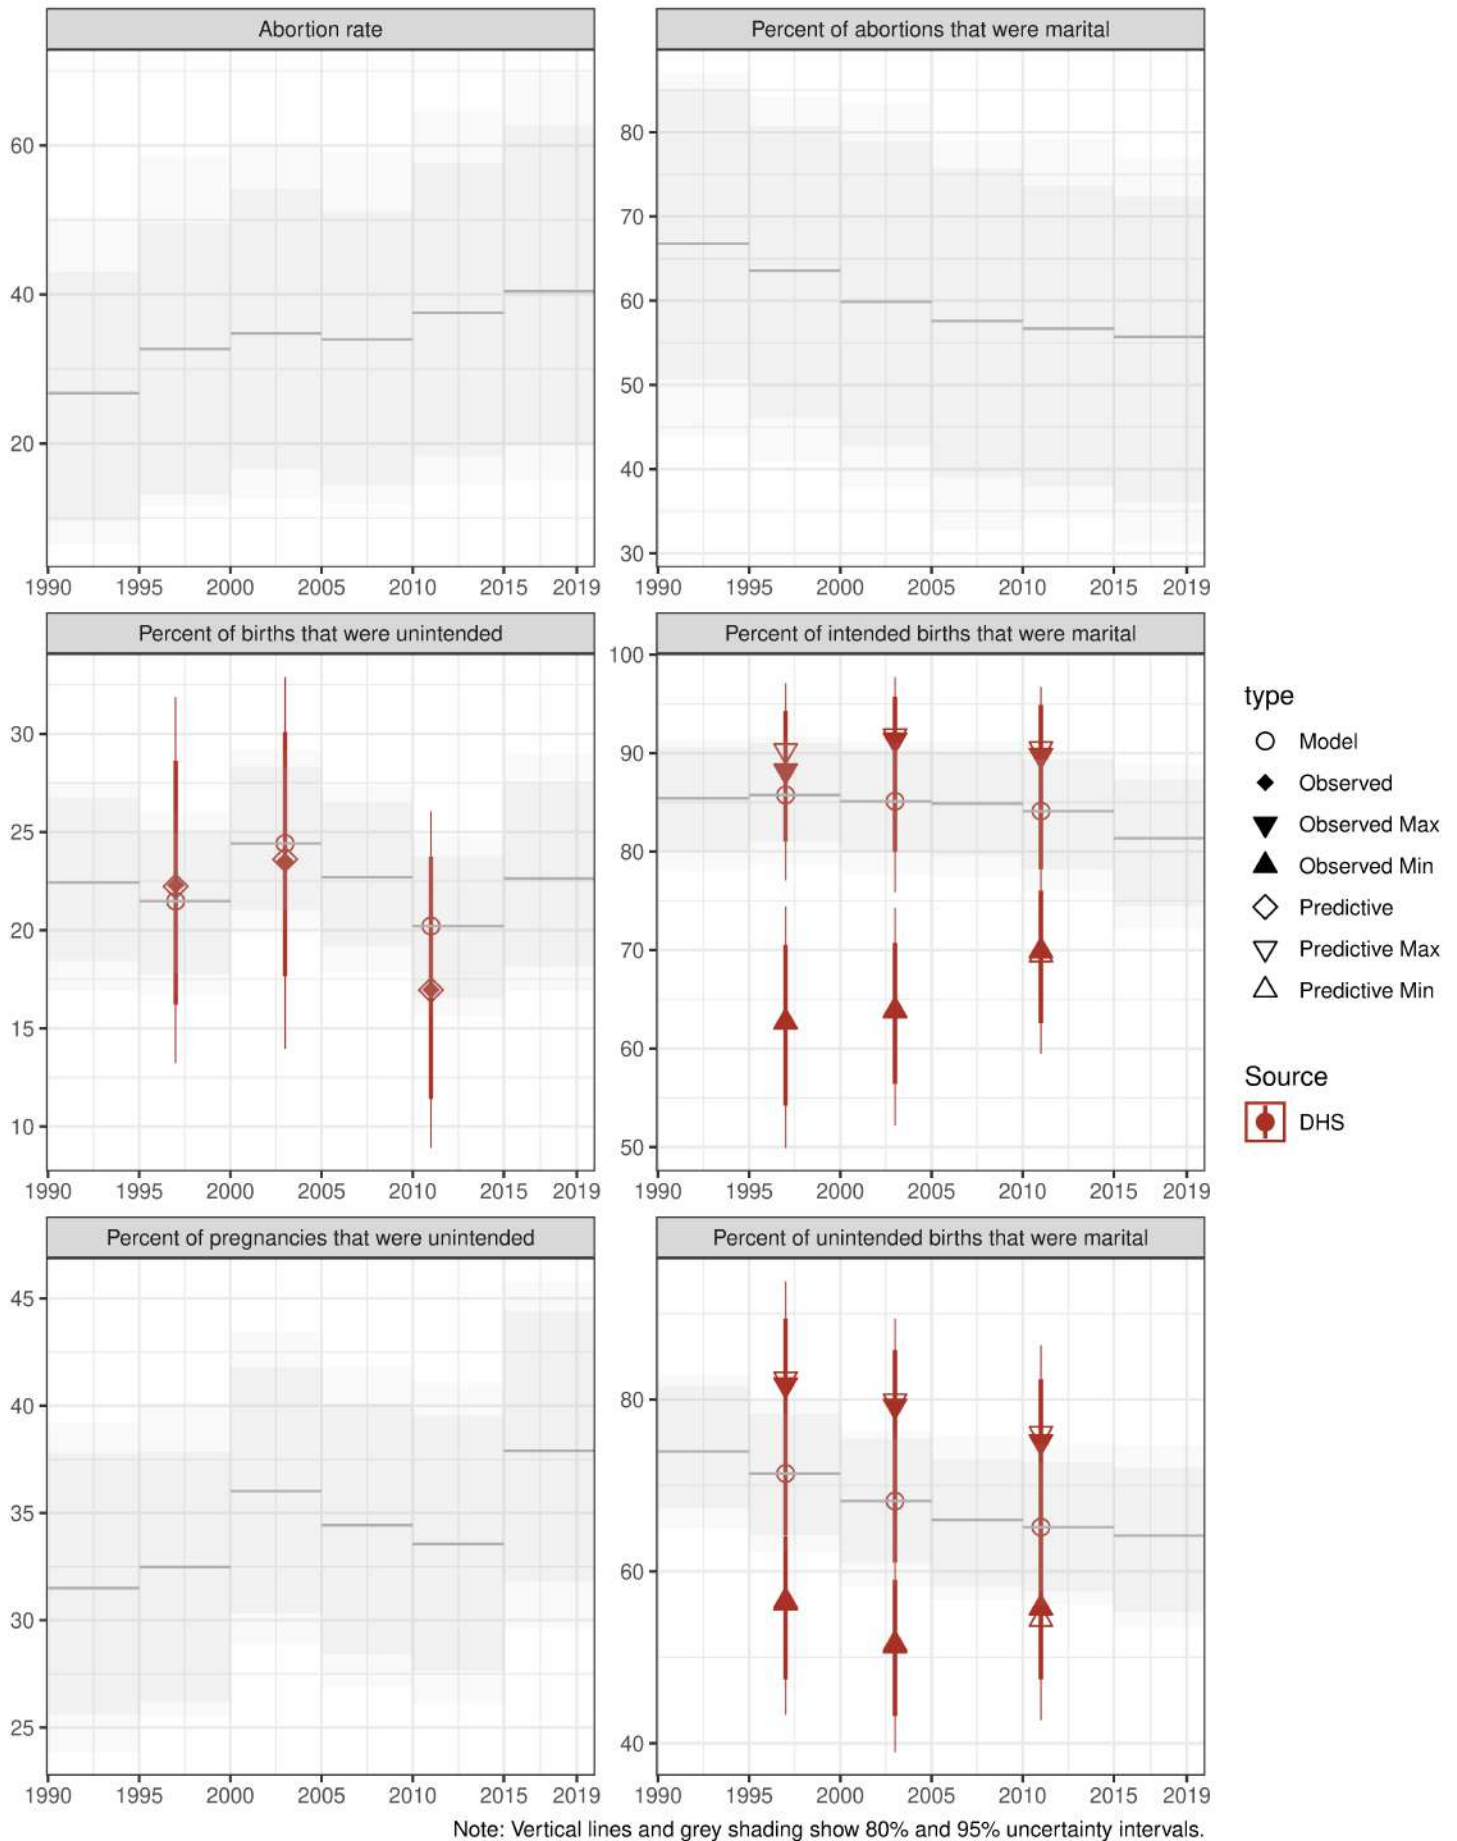

Note: Vertical lines and grey shading show 80% and 95% uncertainty intervals.

### Rwanda

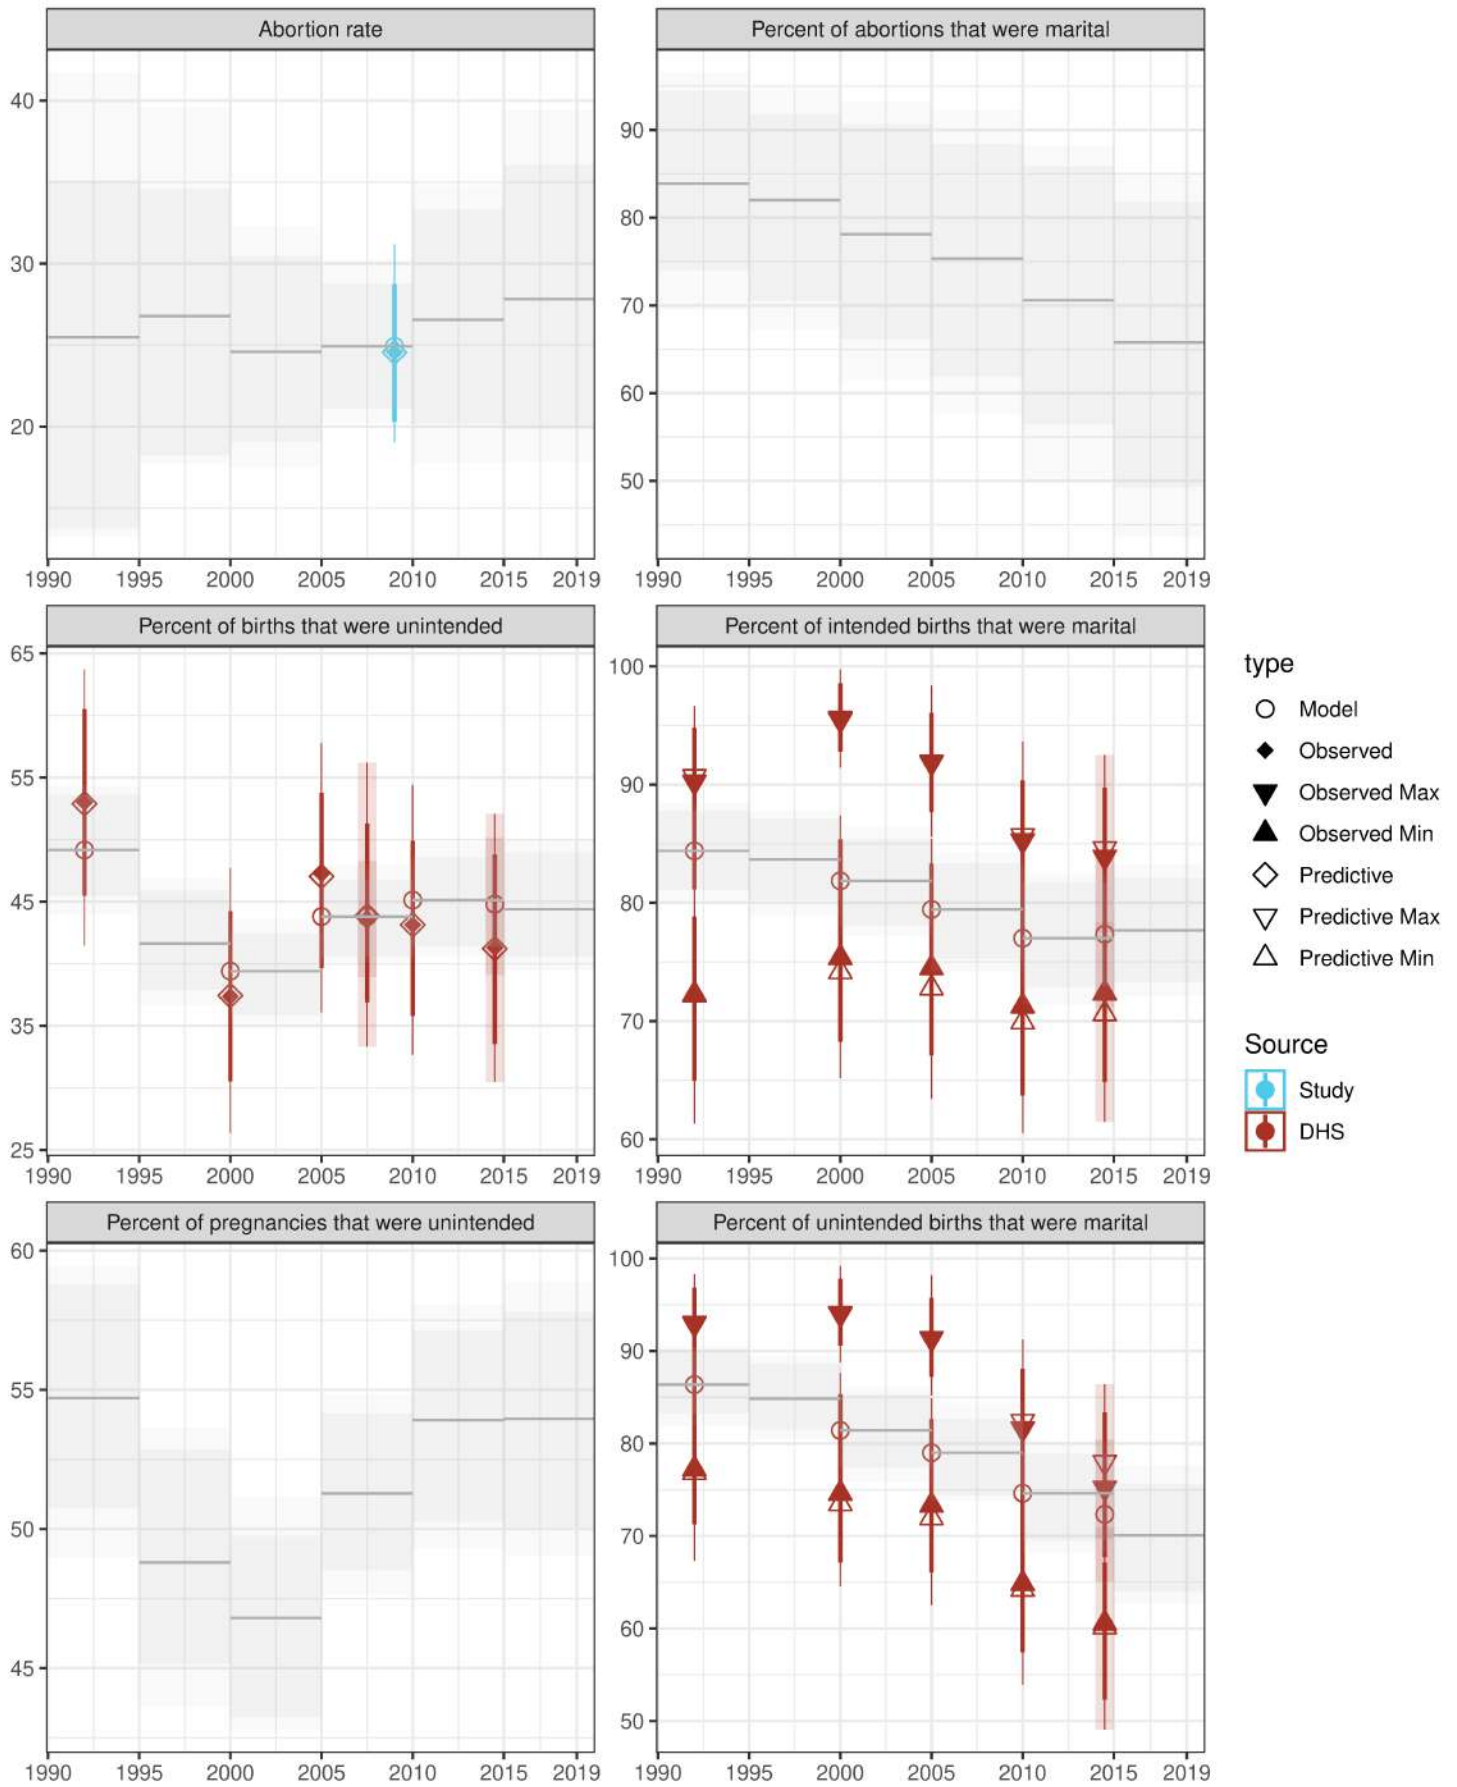

Note: Vertical lines and grey shading show 80% and 95% uncertainty intervals. Color shading shows when data were collected, if more than one year.



R..union

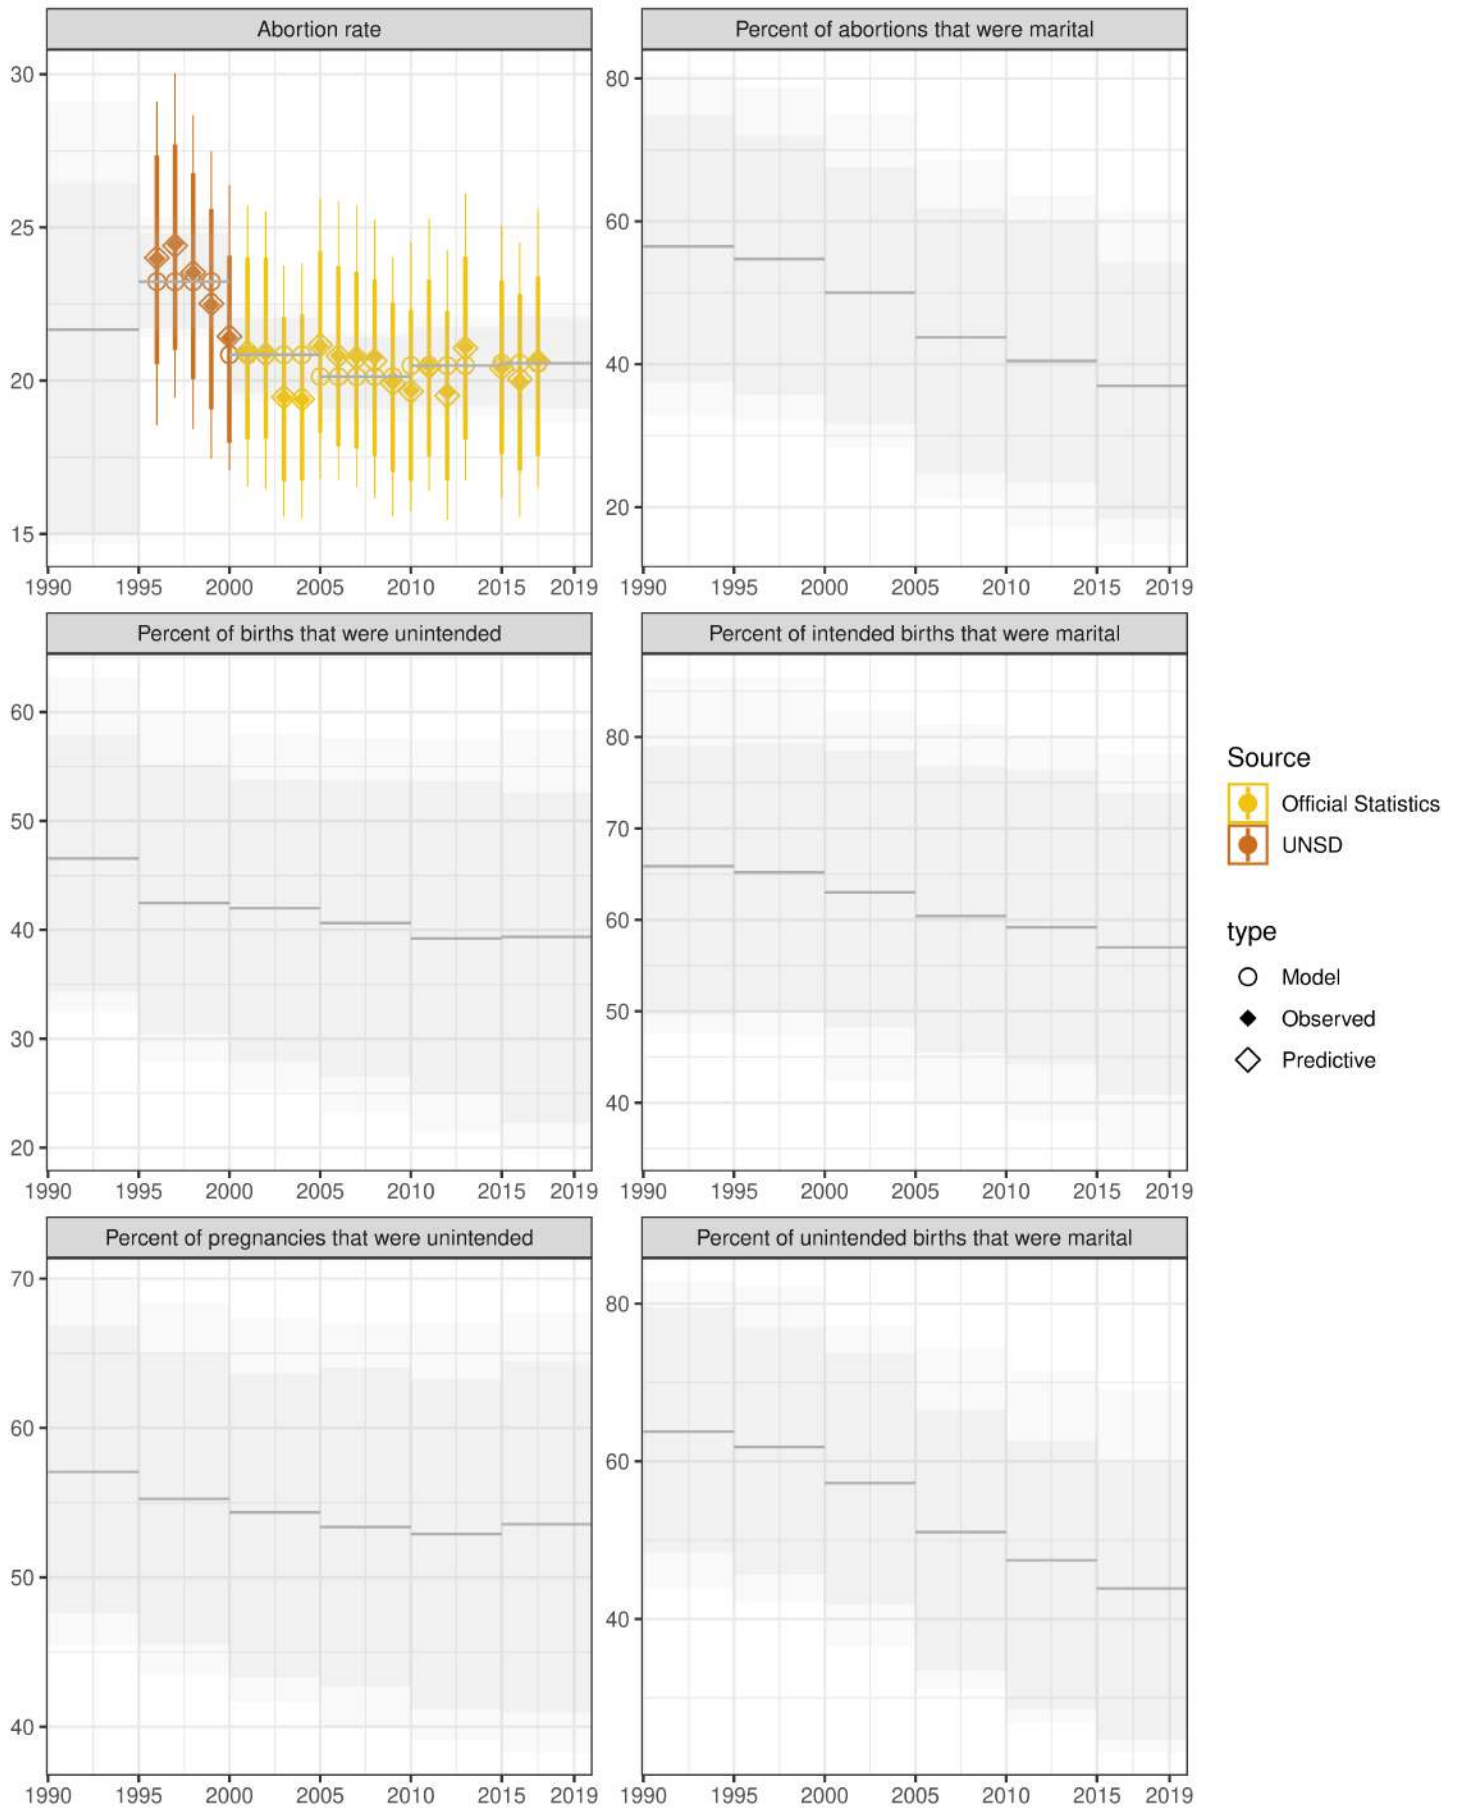

Note: Vertical lines and grey shading show 80% and 95% uncertainty intervals.

### Somalia

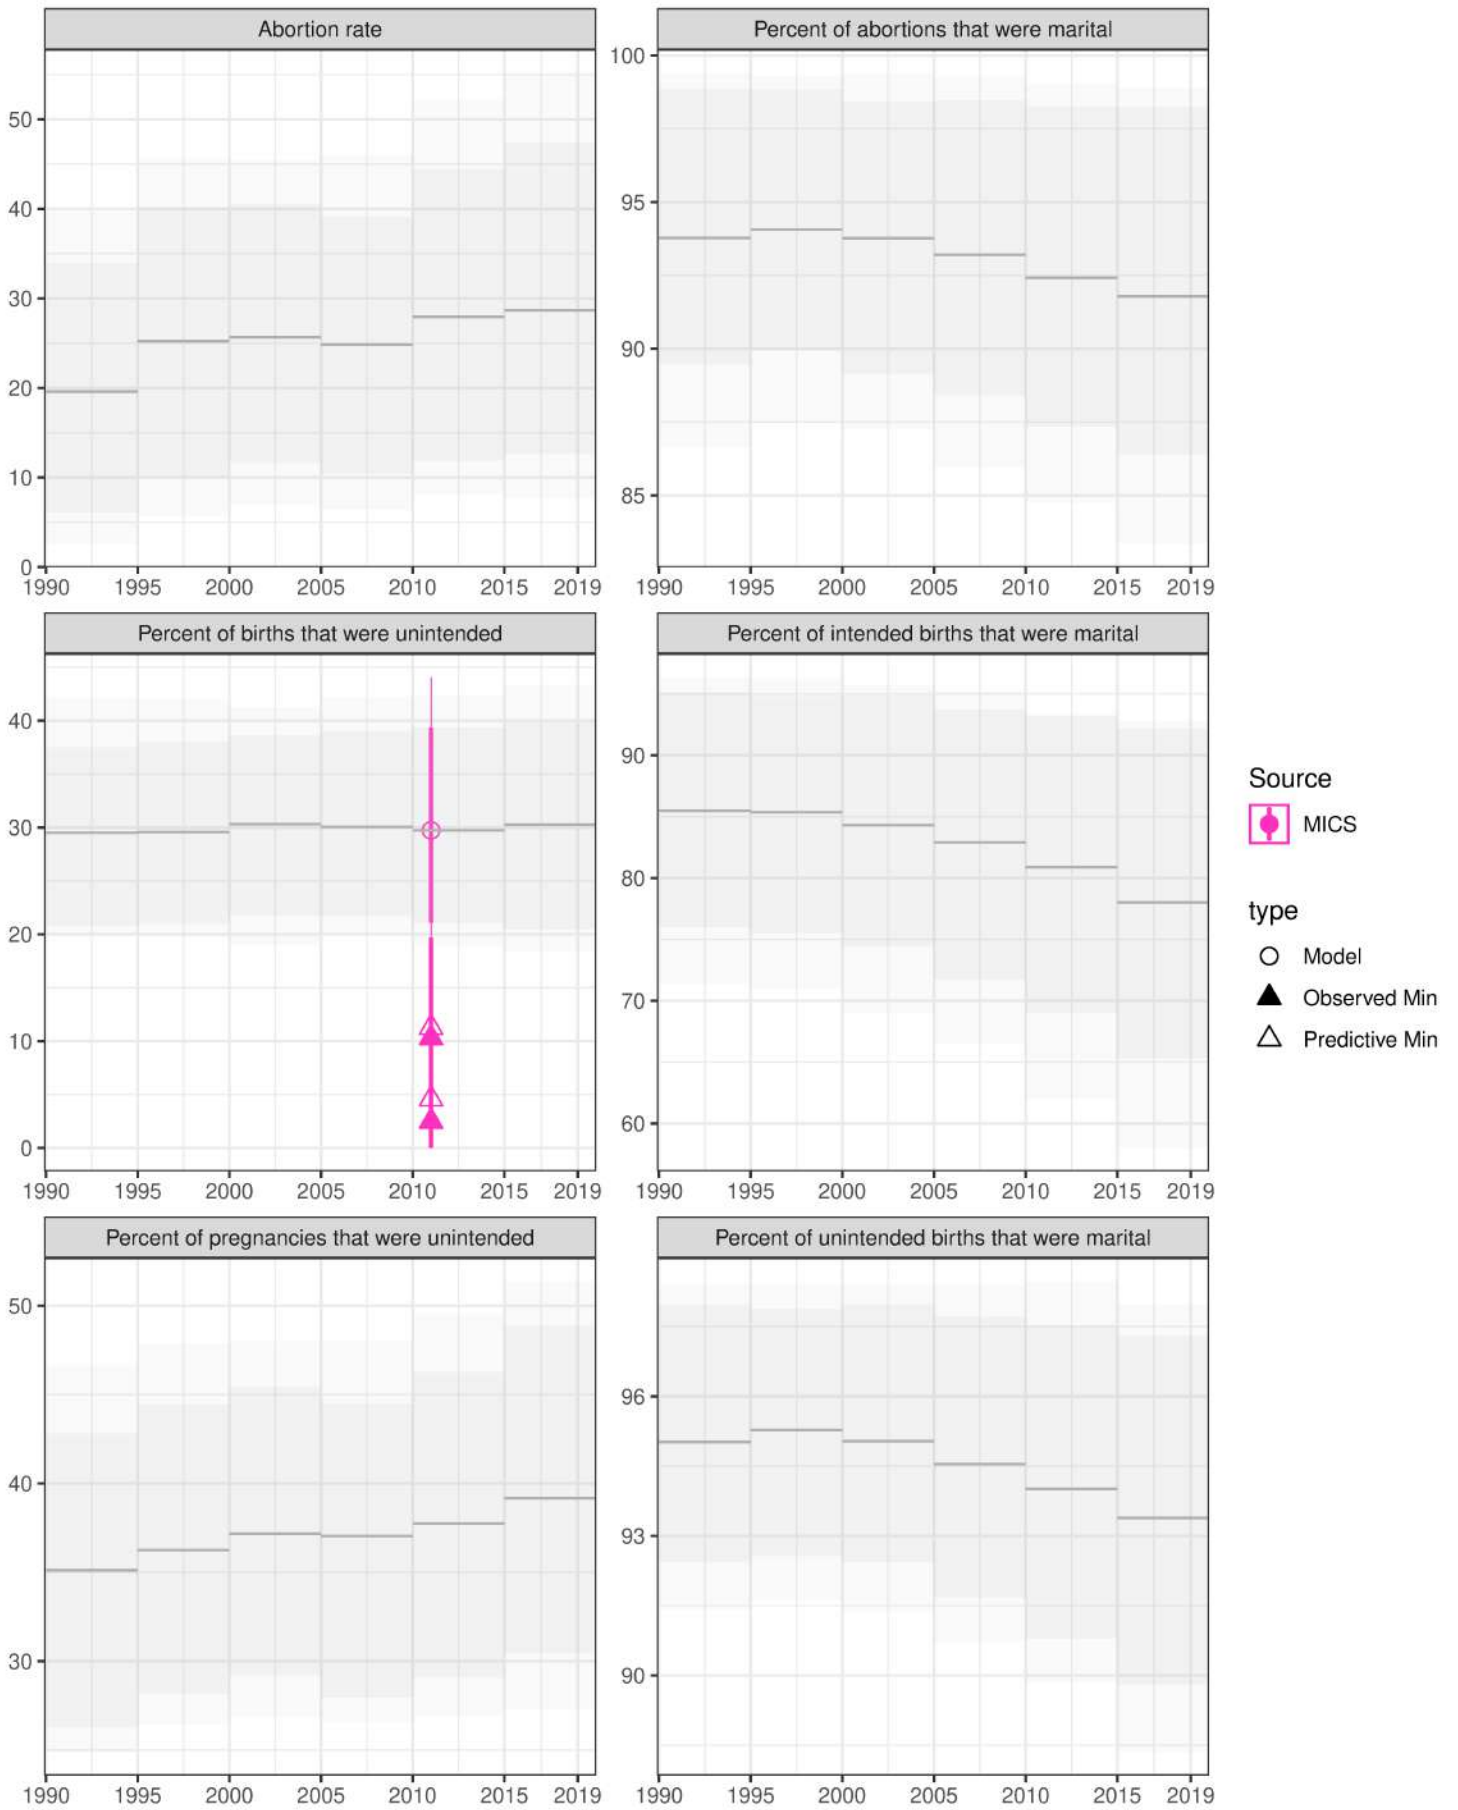

Note: Vertical lines and grey shading show 80% and 95% uncertainty intervals.

### South Sudan

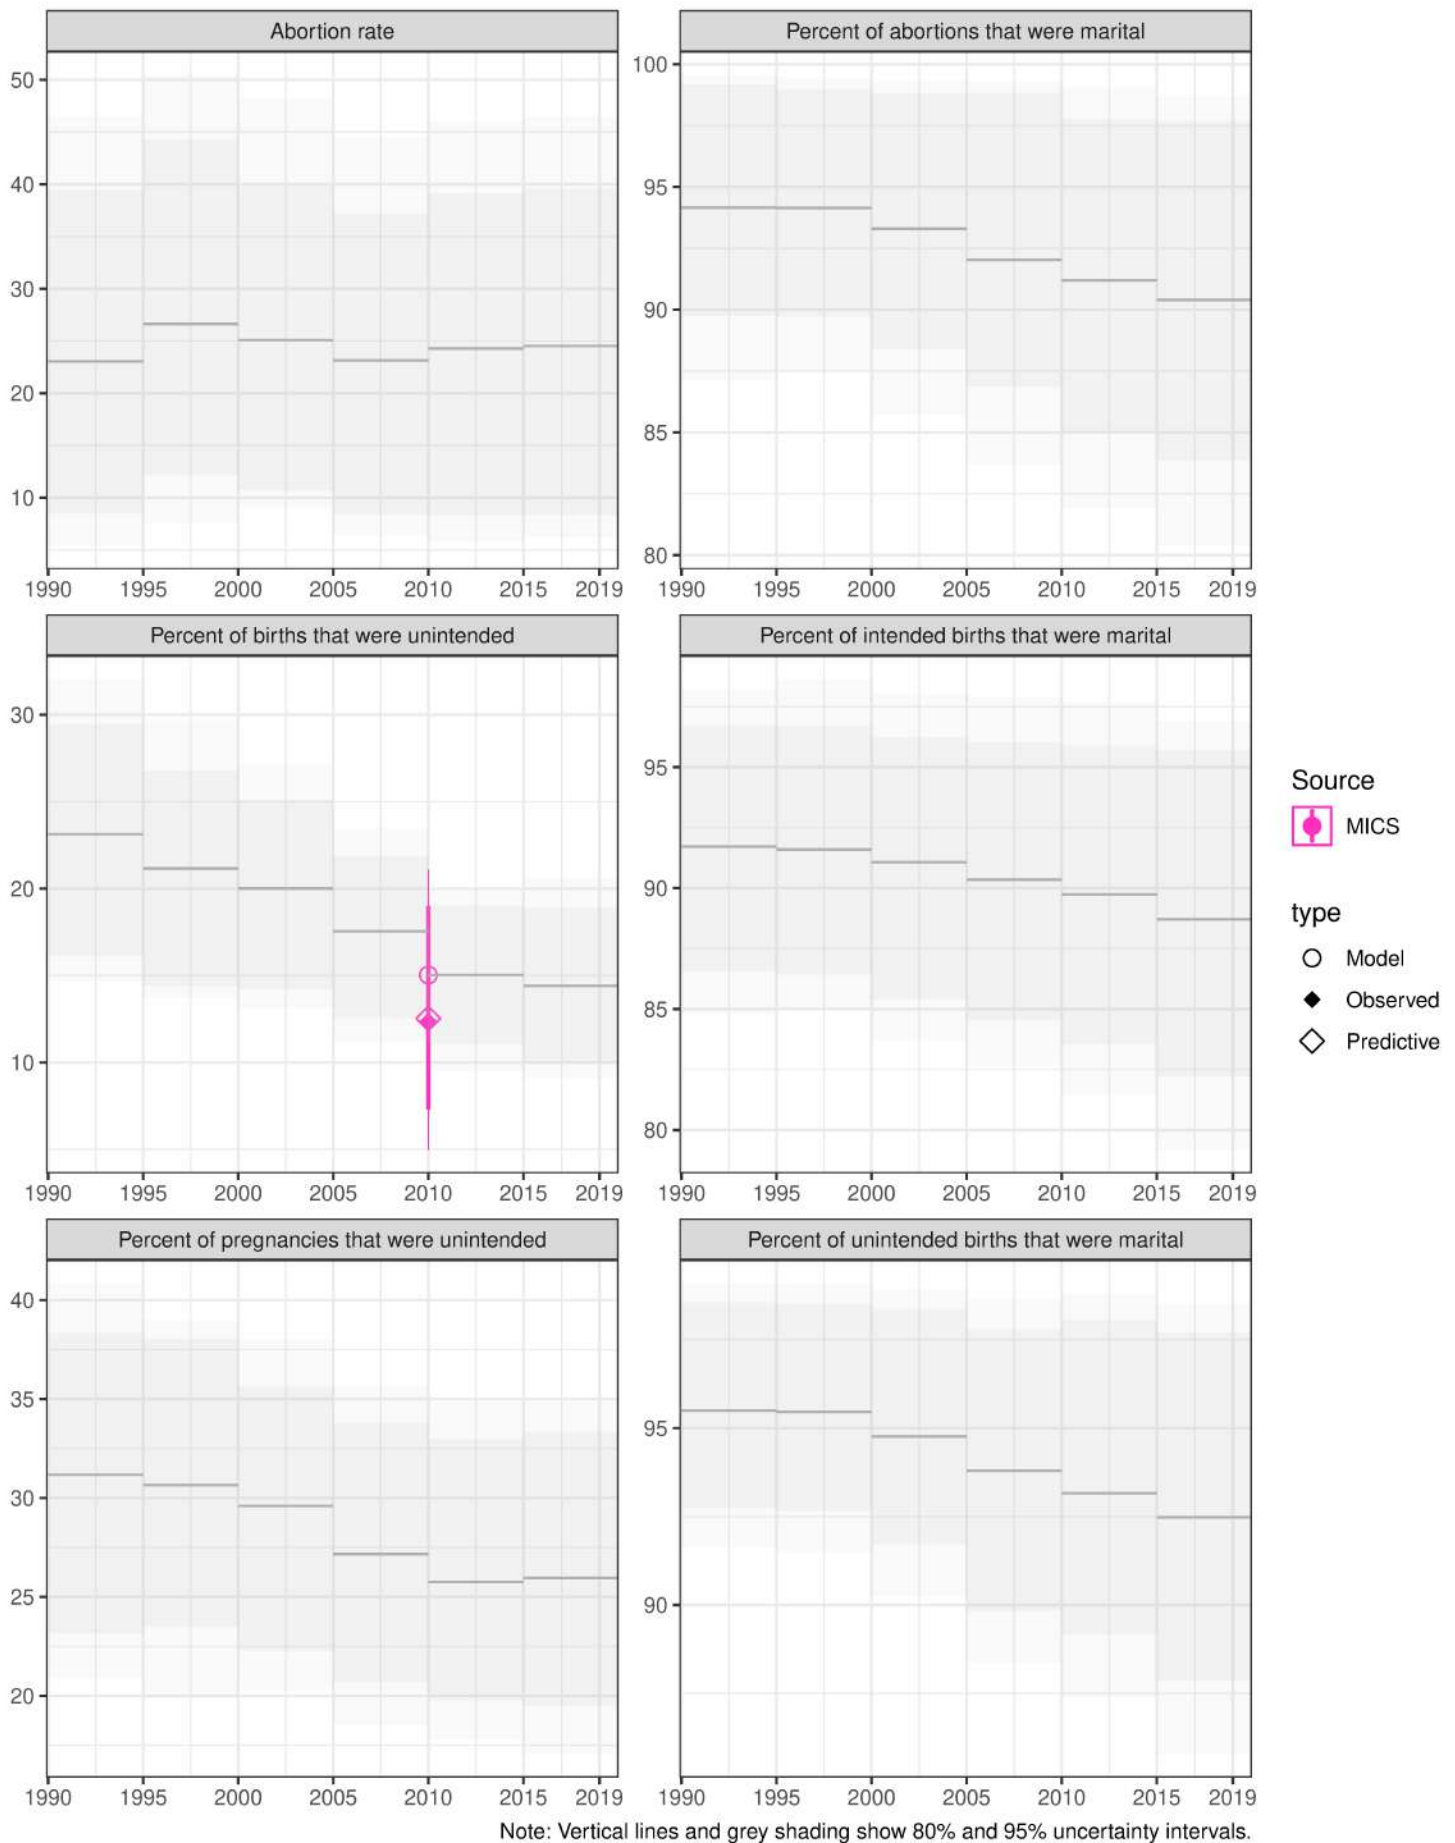

Note: Vertical lines and grey shading show 80% and 95% uncertainty intervals.

### Tanzania

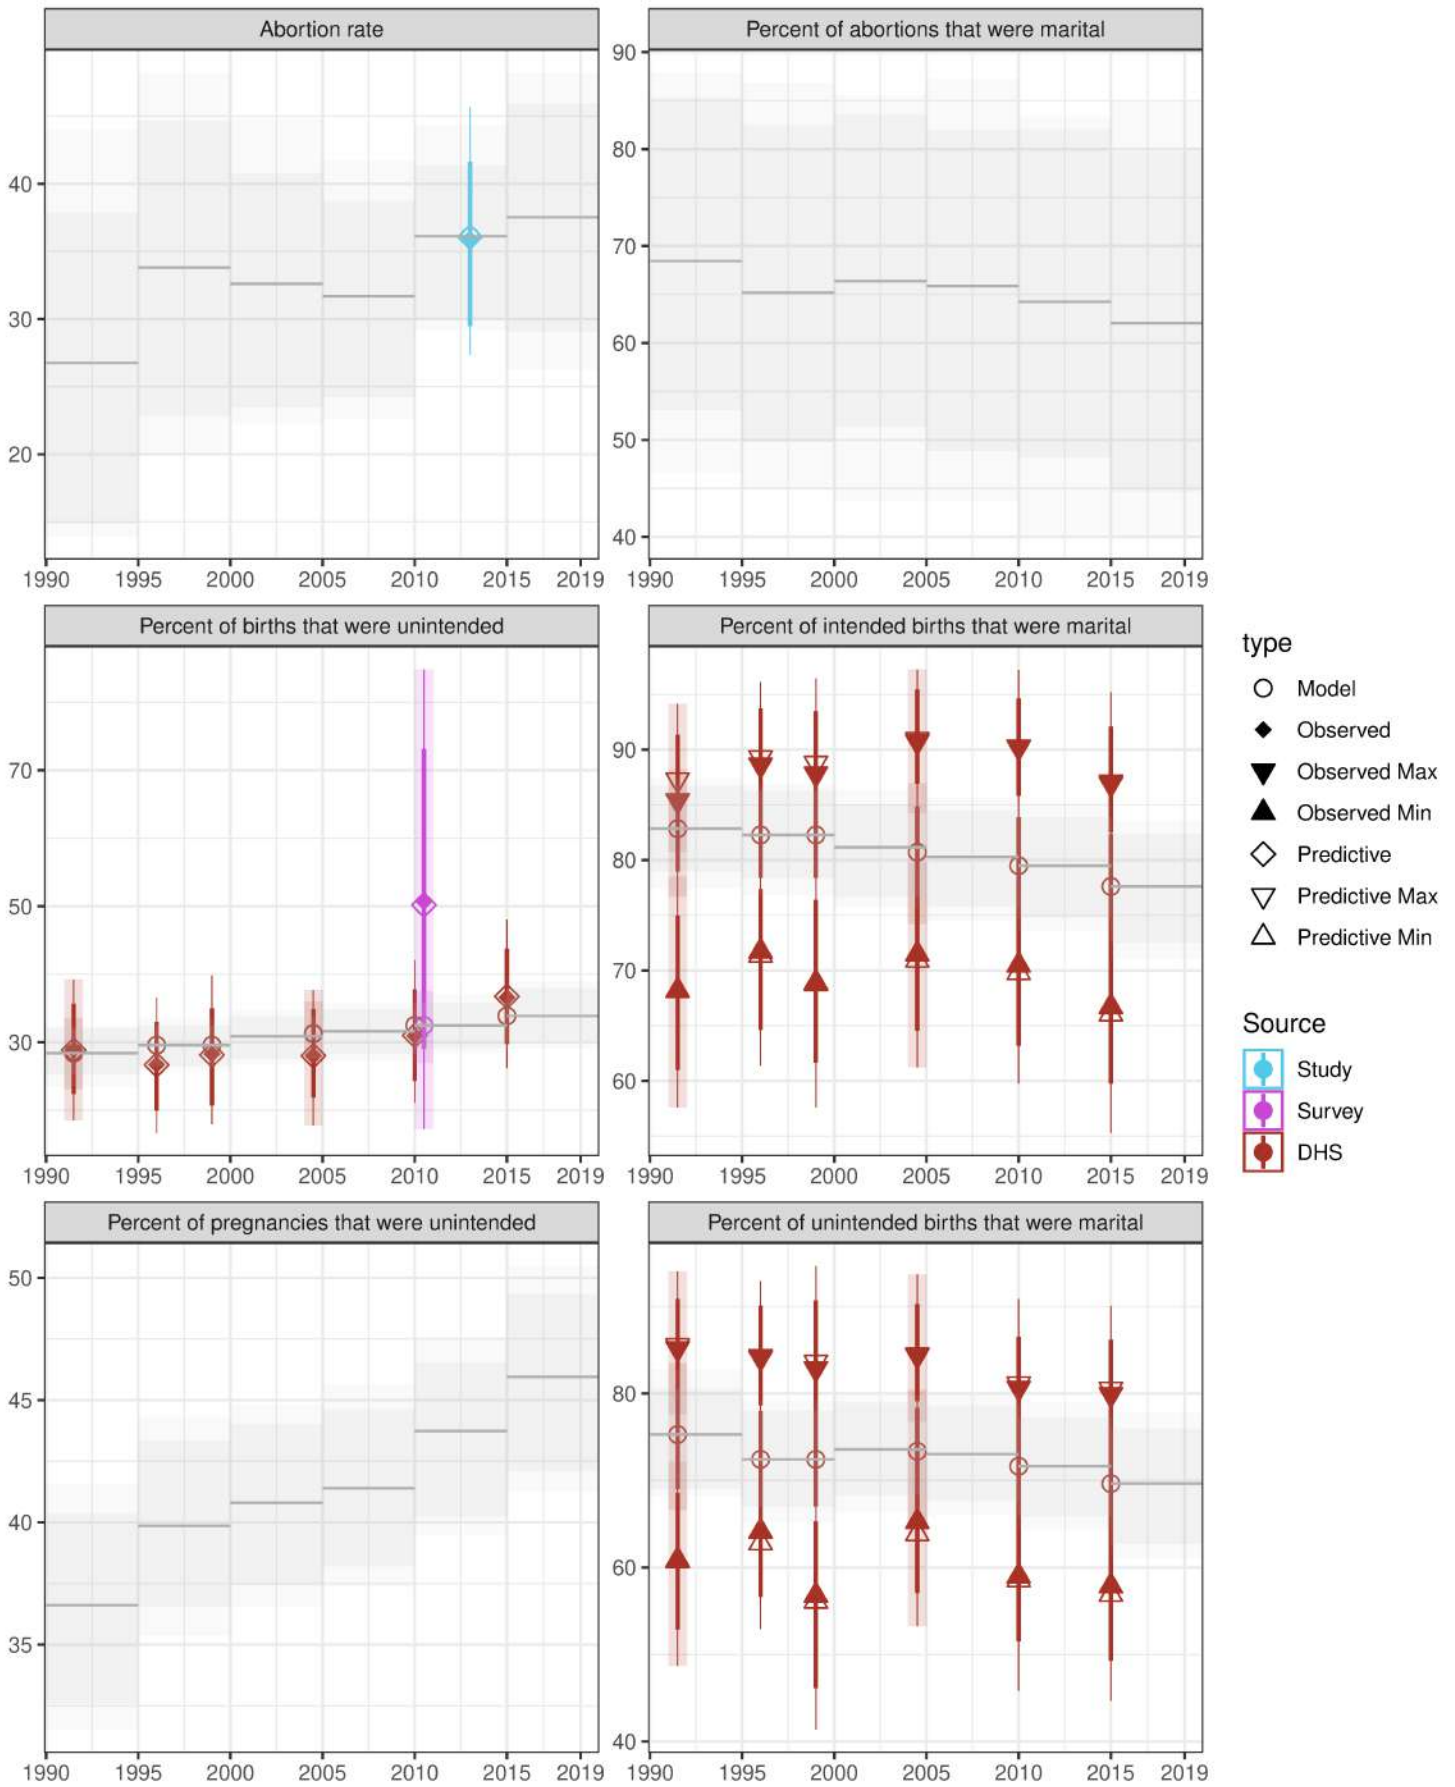

Note: Vertical lines and grey shading show 80% and 95% uncertainty intervals. Color shading shows when data were collected, if more than one year.

### Uganda

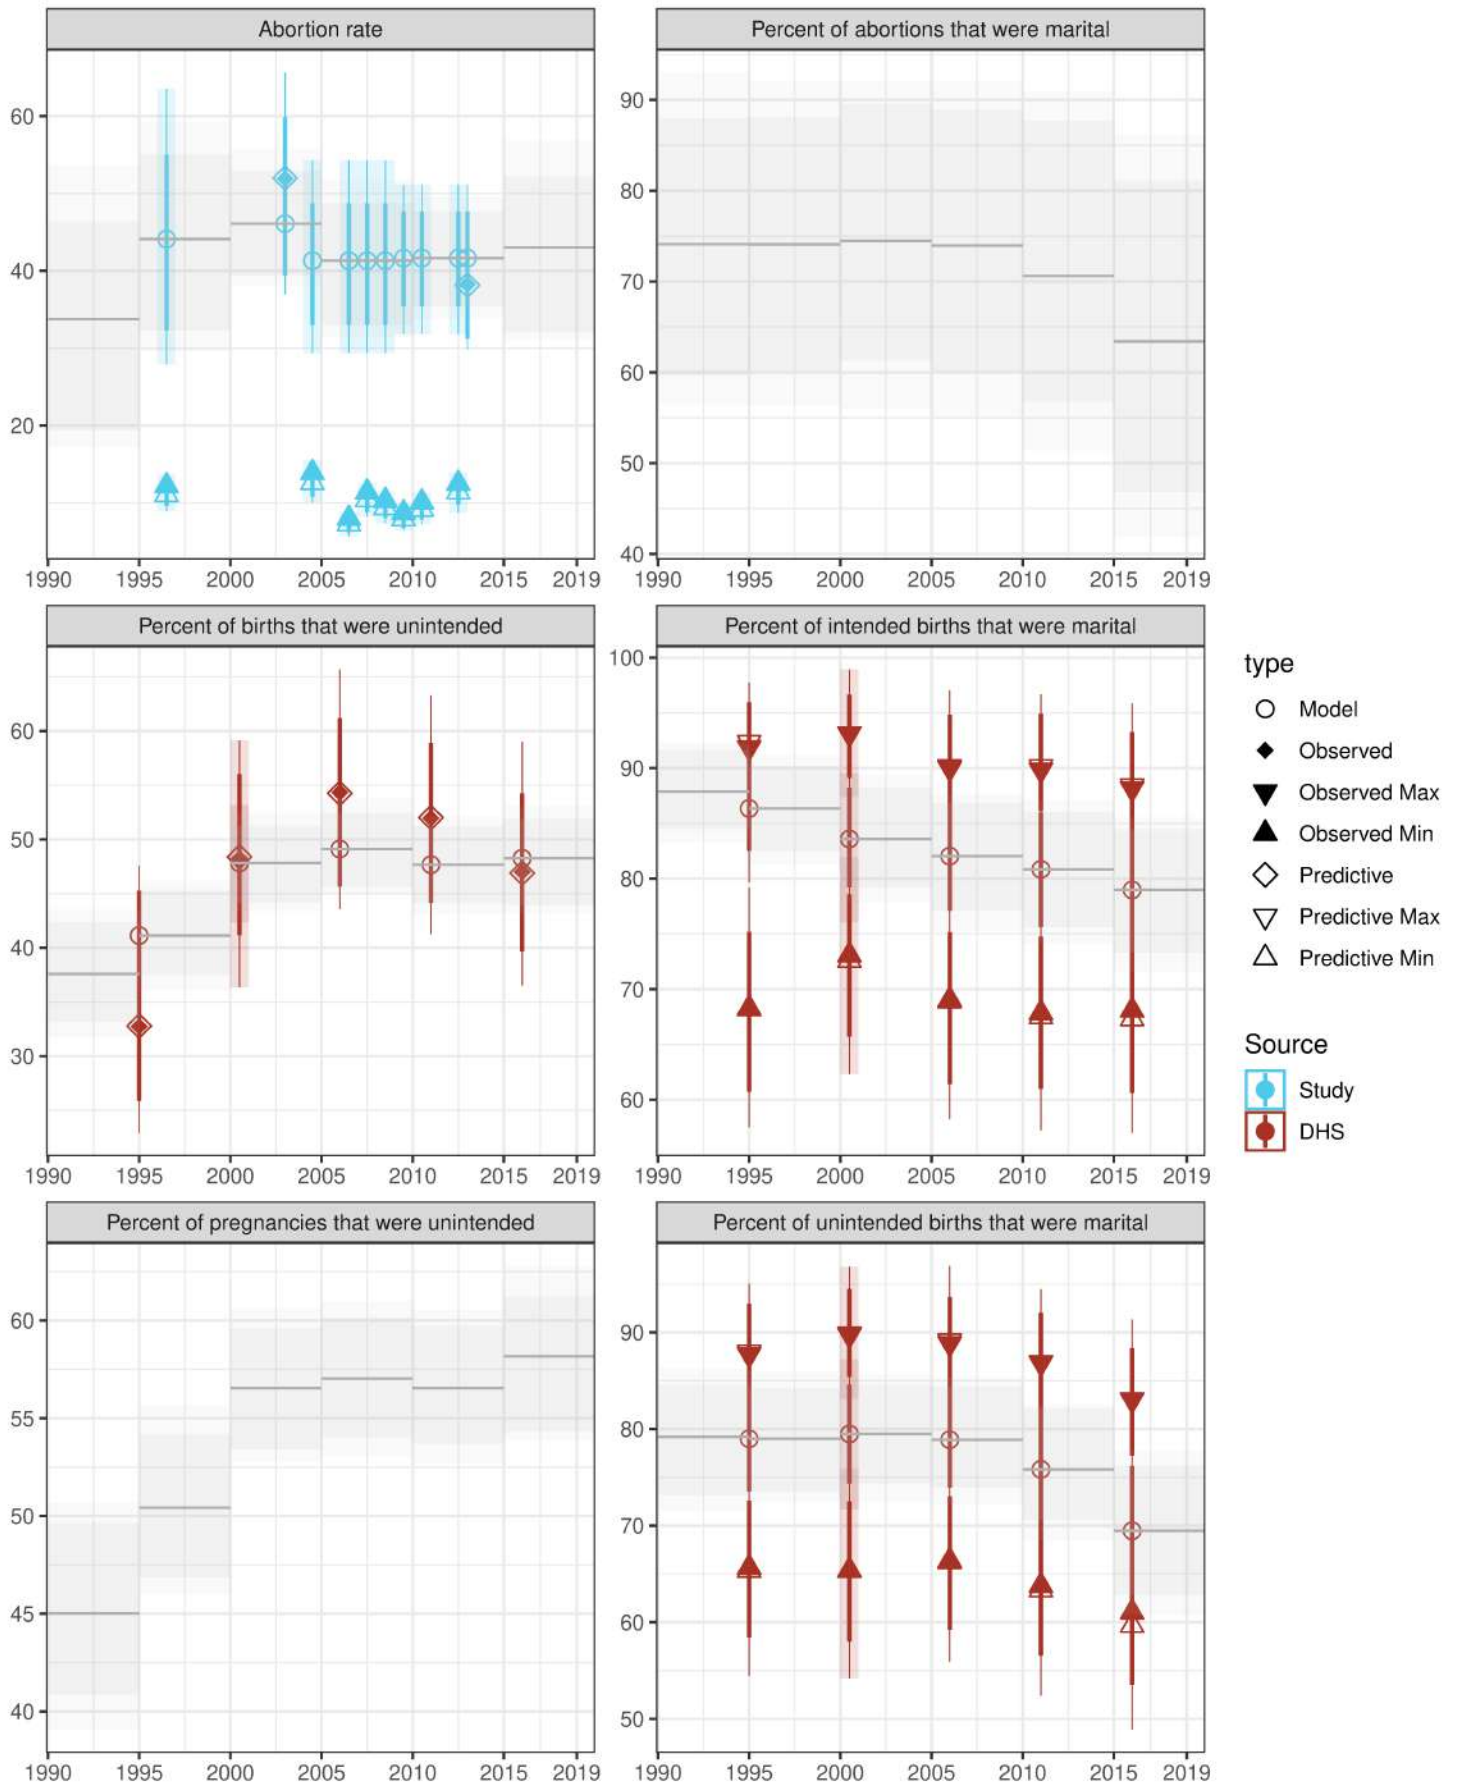

Note: Vertical lines and grey shading show 80% and 95% uncertainty intervals. Color shading shows when data were collected, if more than one year.

### Zambia

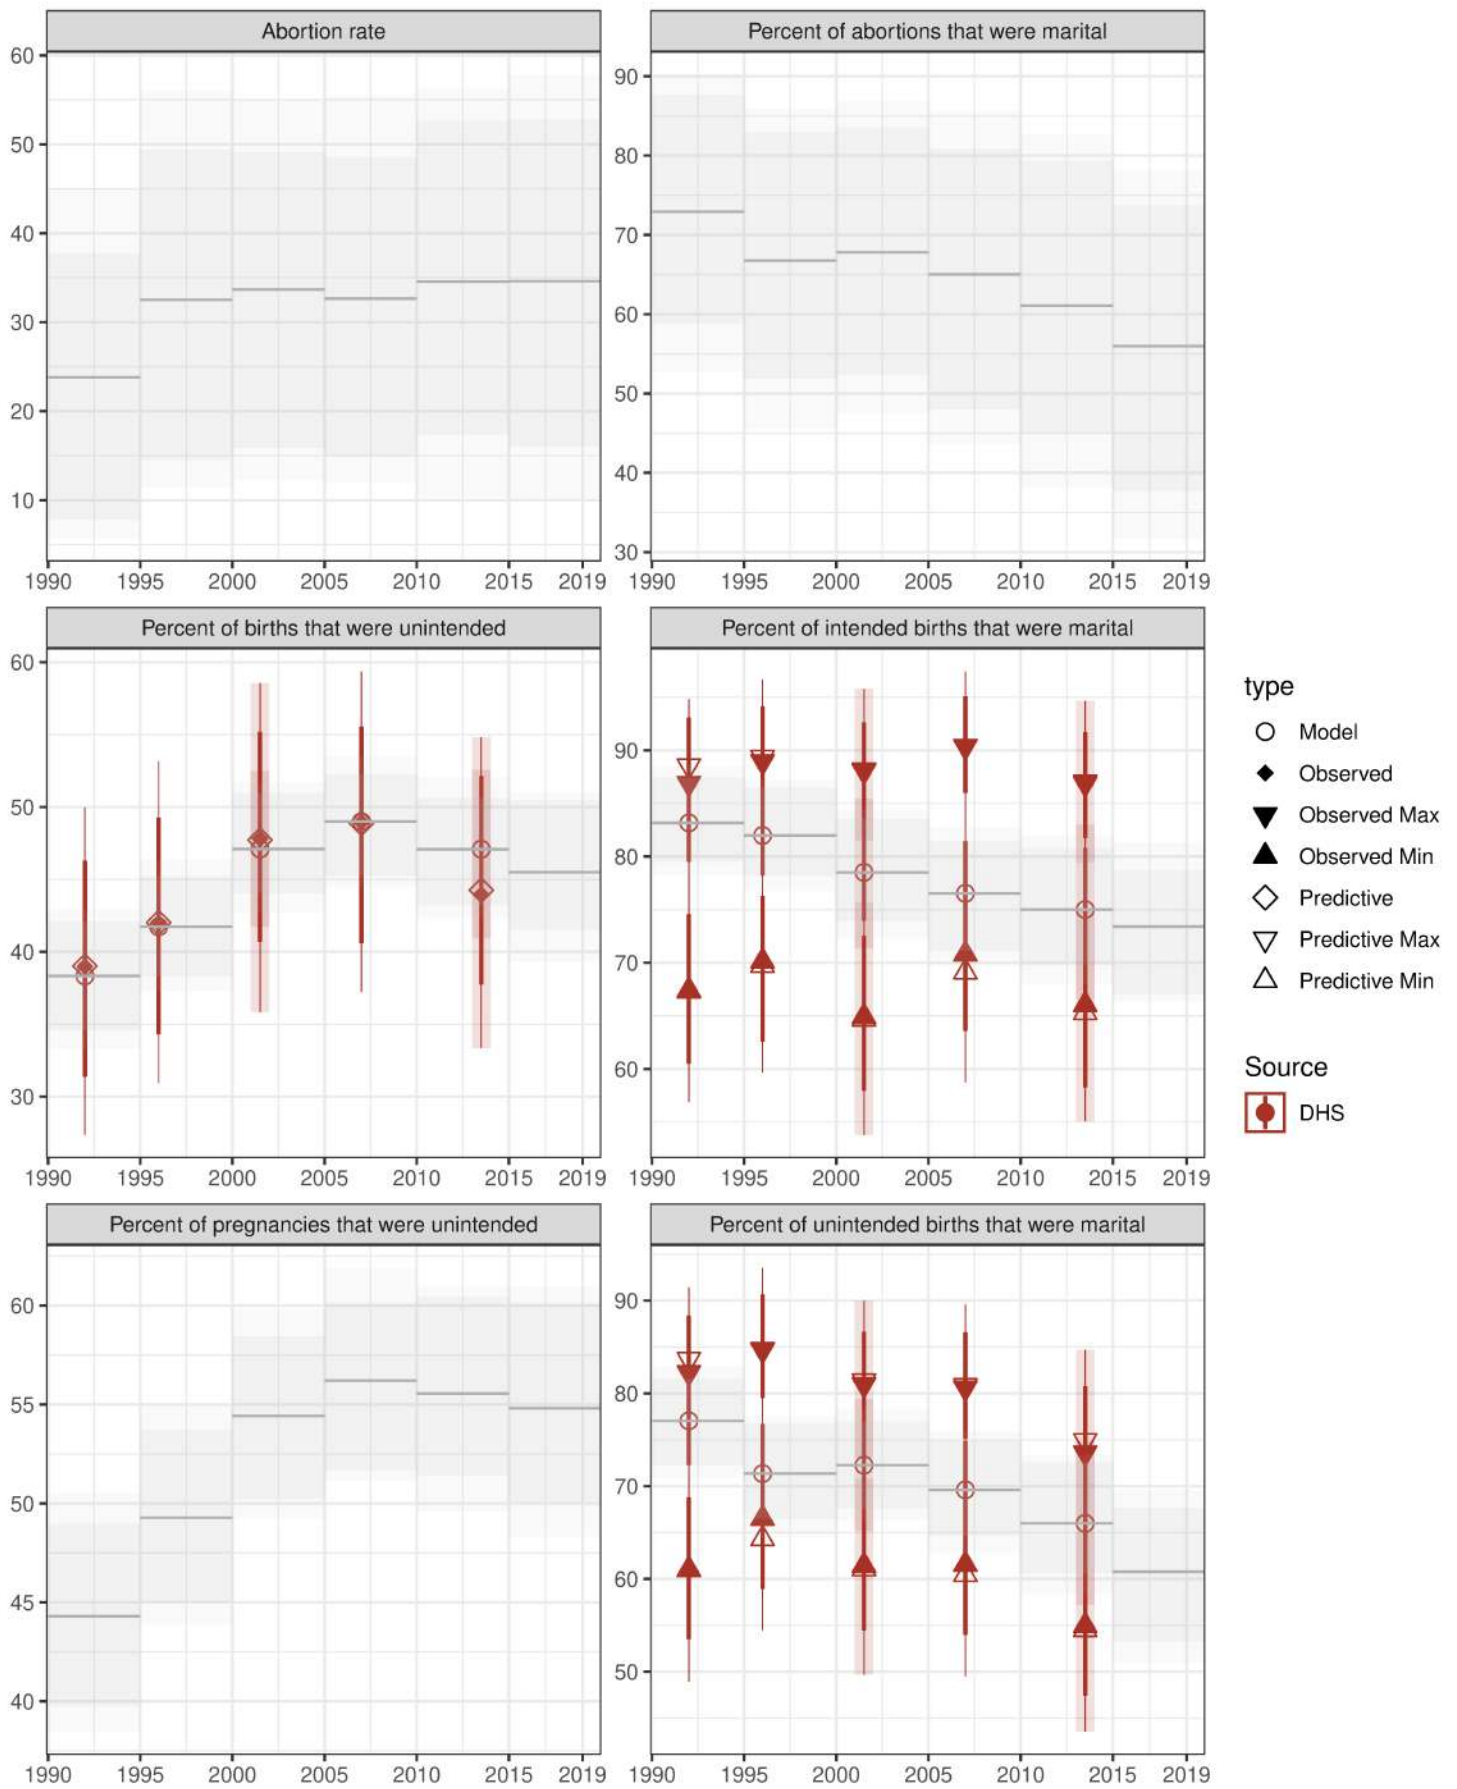

Note: Vertical lines and grey shading show 80% and 95% uncertainty intervals. Color shading shows when data were collected, if more than one year.

### Zimbabwe

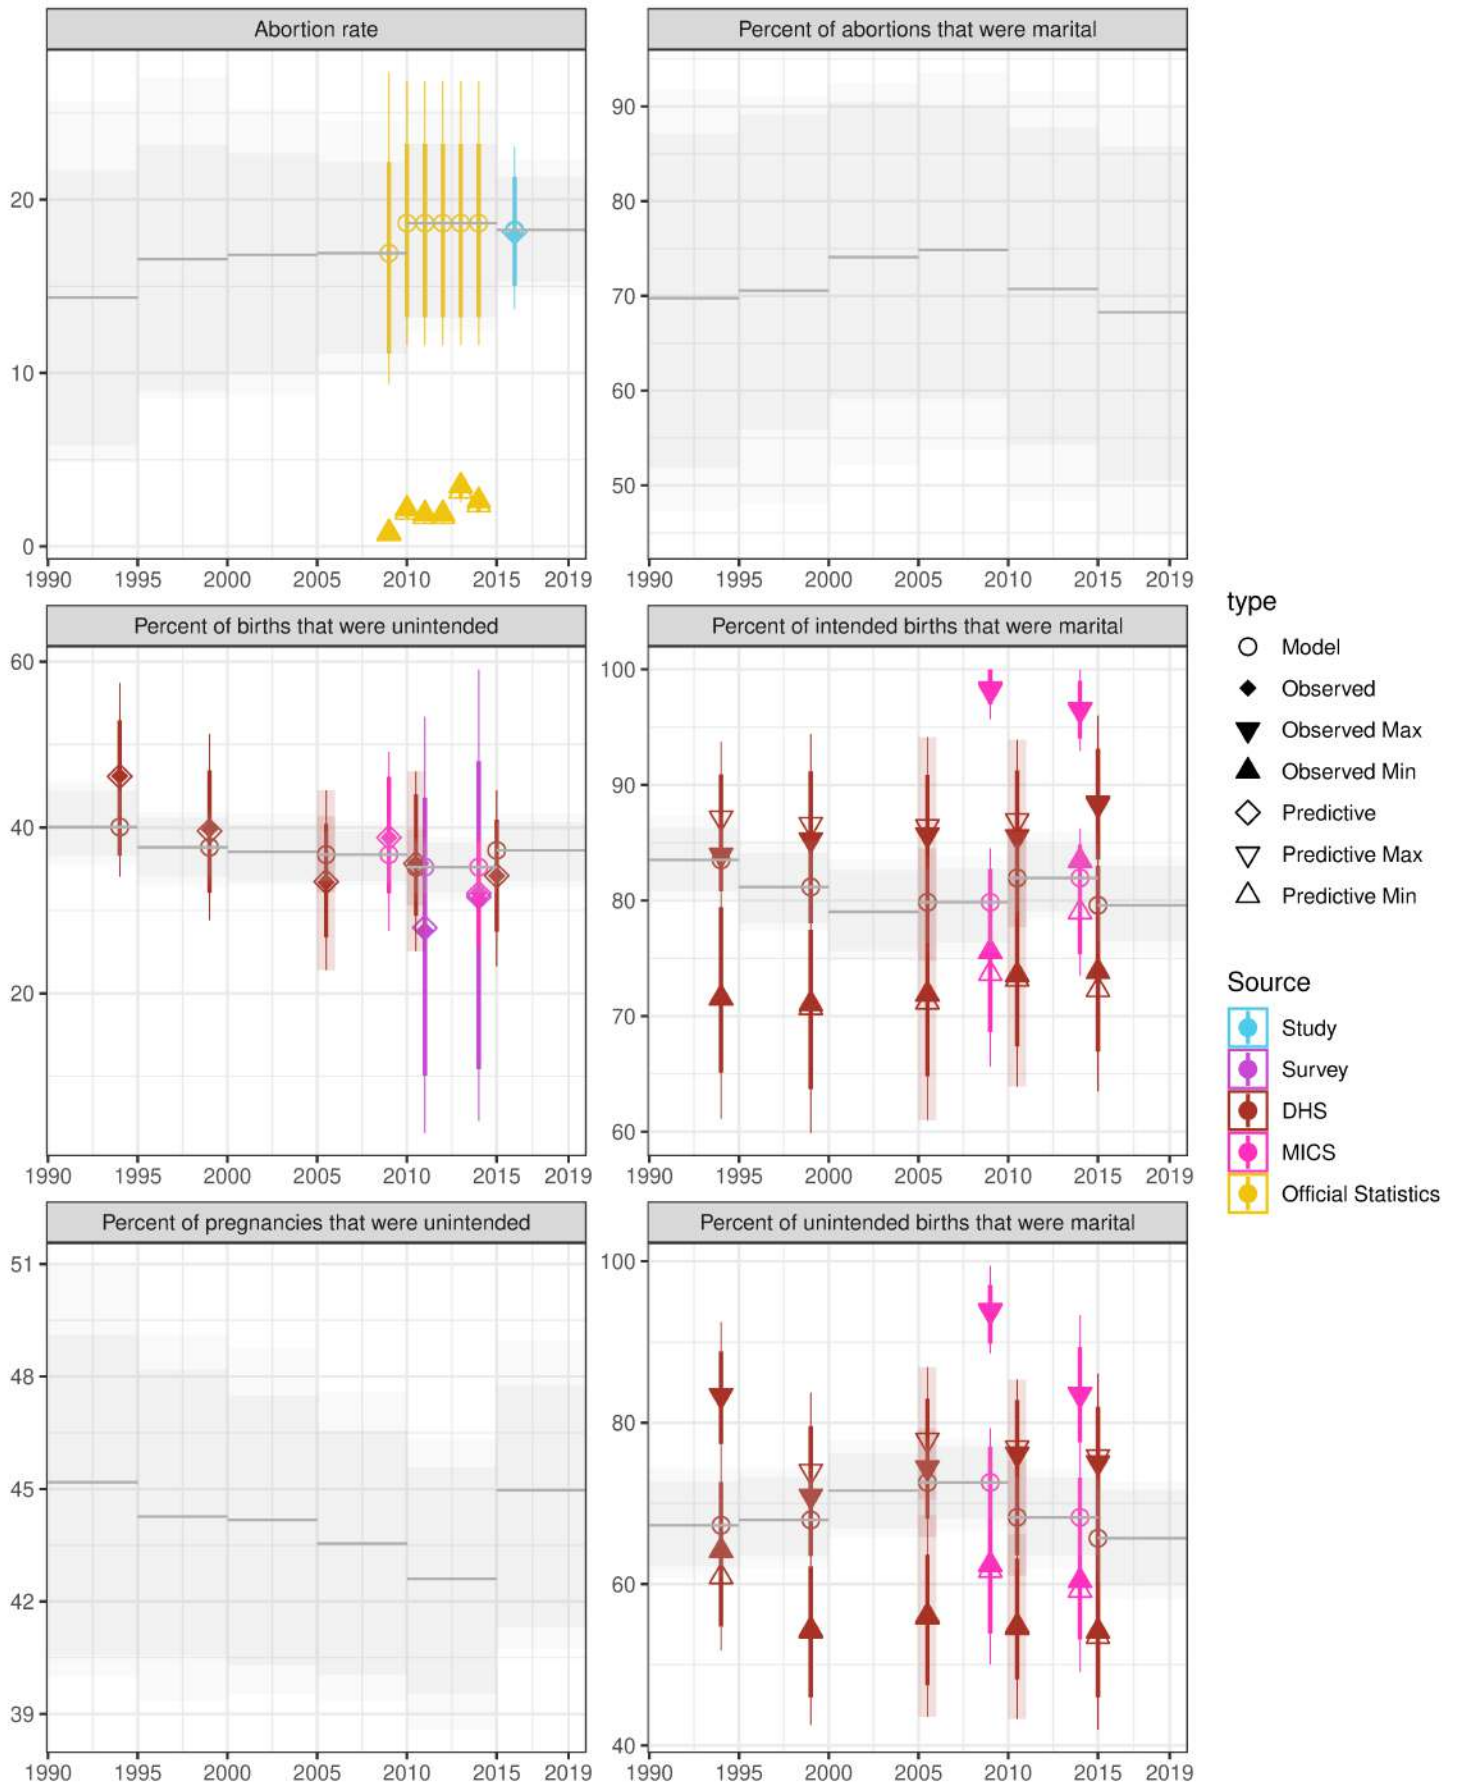

Note: Vertical lines and grey shading show 80% and 95% uncertainty intervals. Color shading shows when data were collected, if more than one year.

## 1.2 Western Africa



### Benin

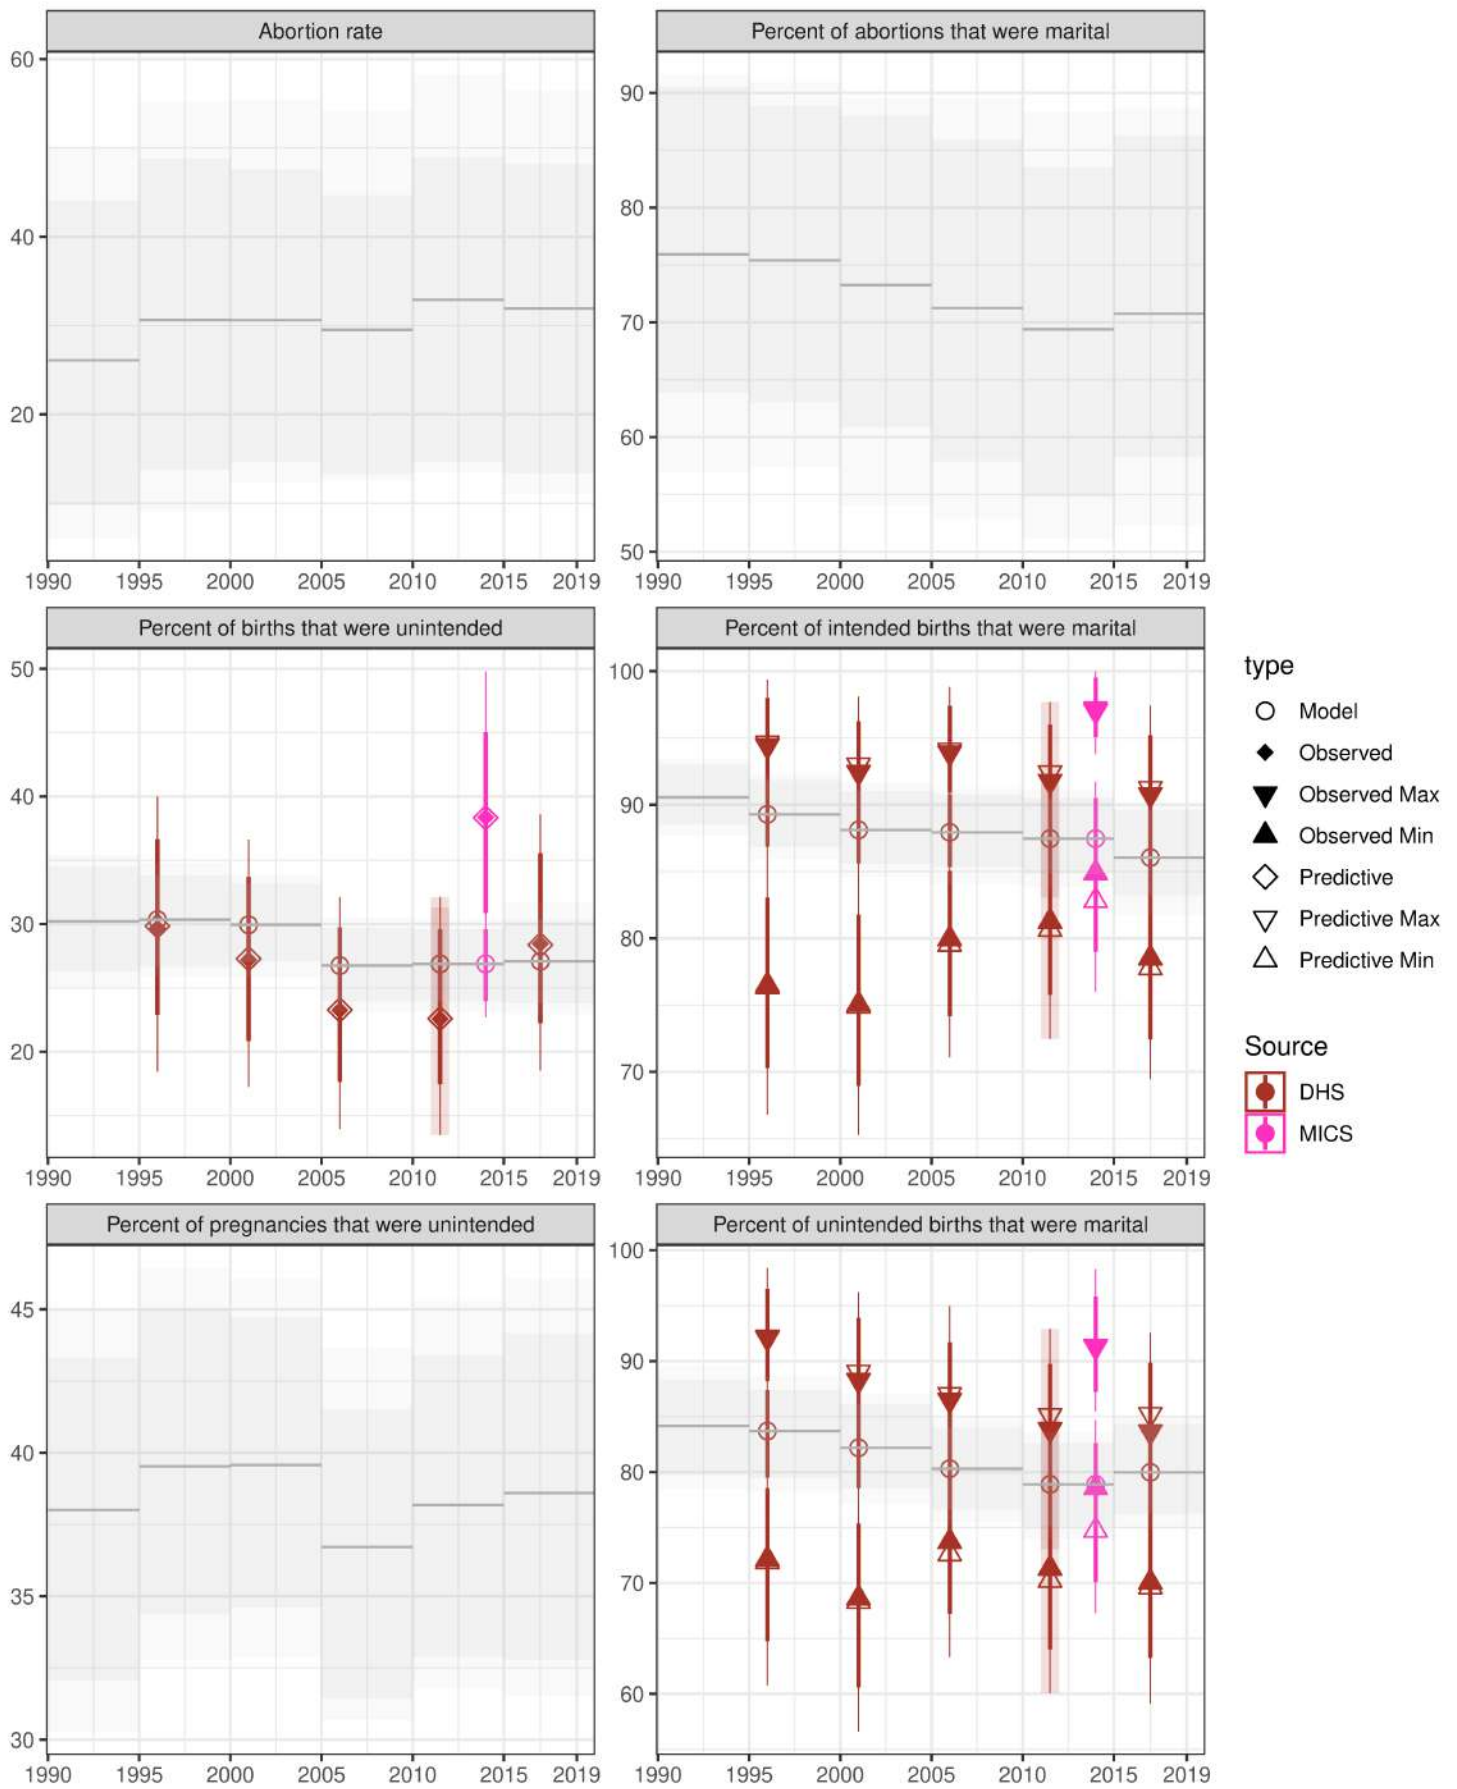

Note: Vertical lines and grey shading show 80% and 95% uncertainty intervals. Color shading shows when data were collected, if more than one year.

### Burkina Faso

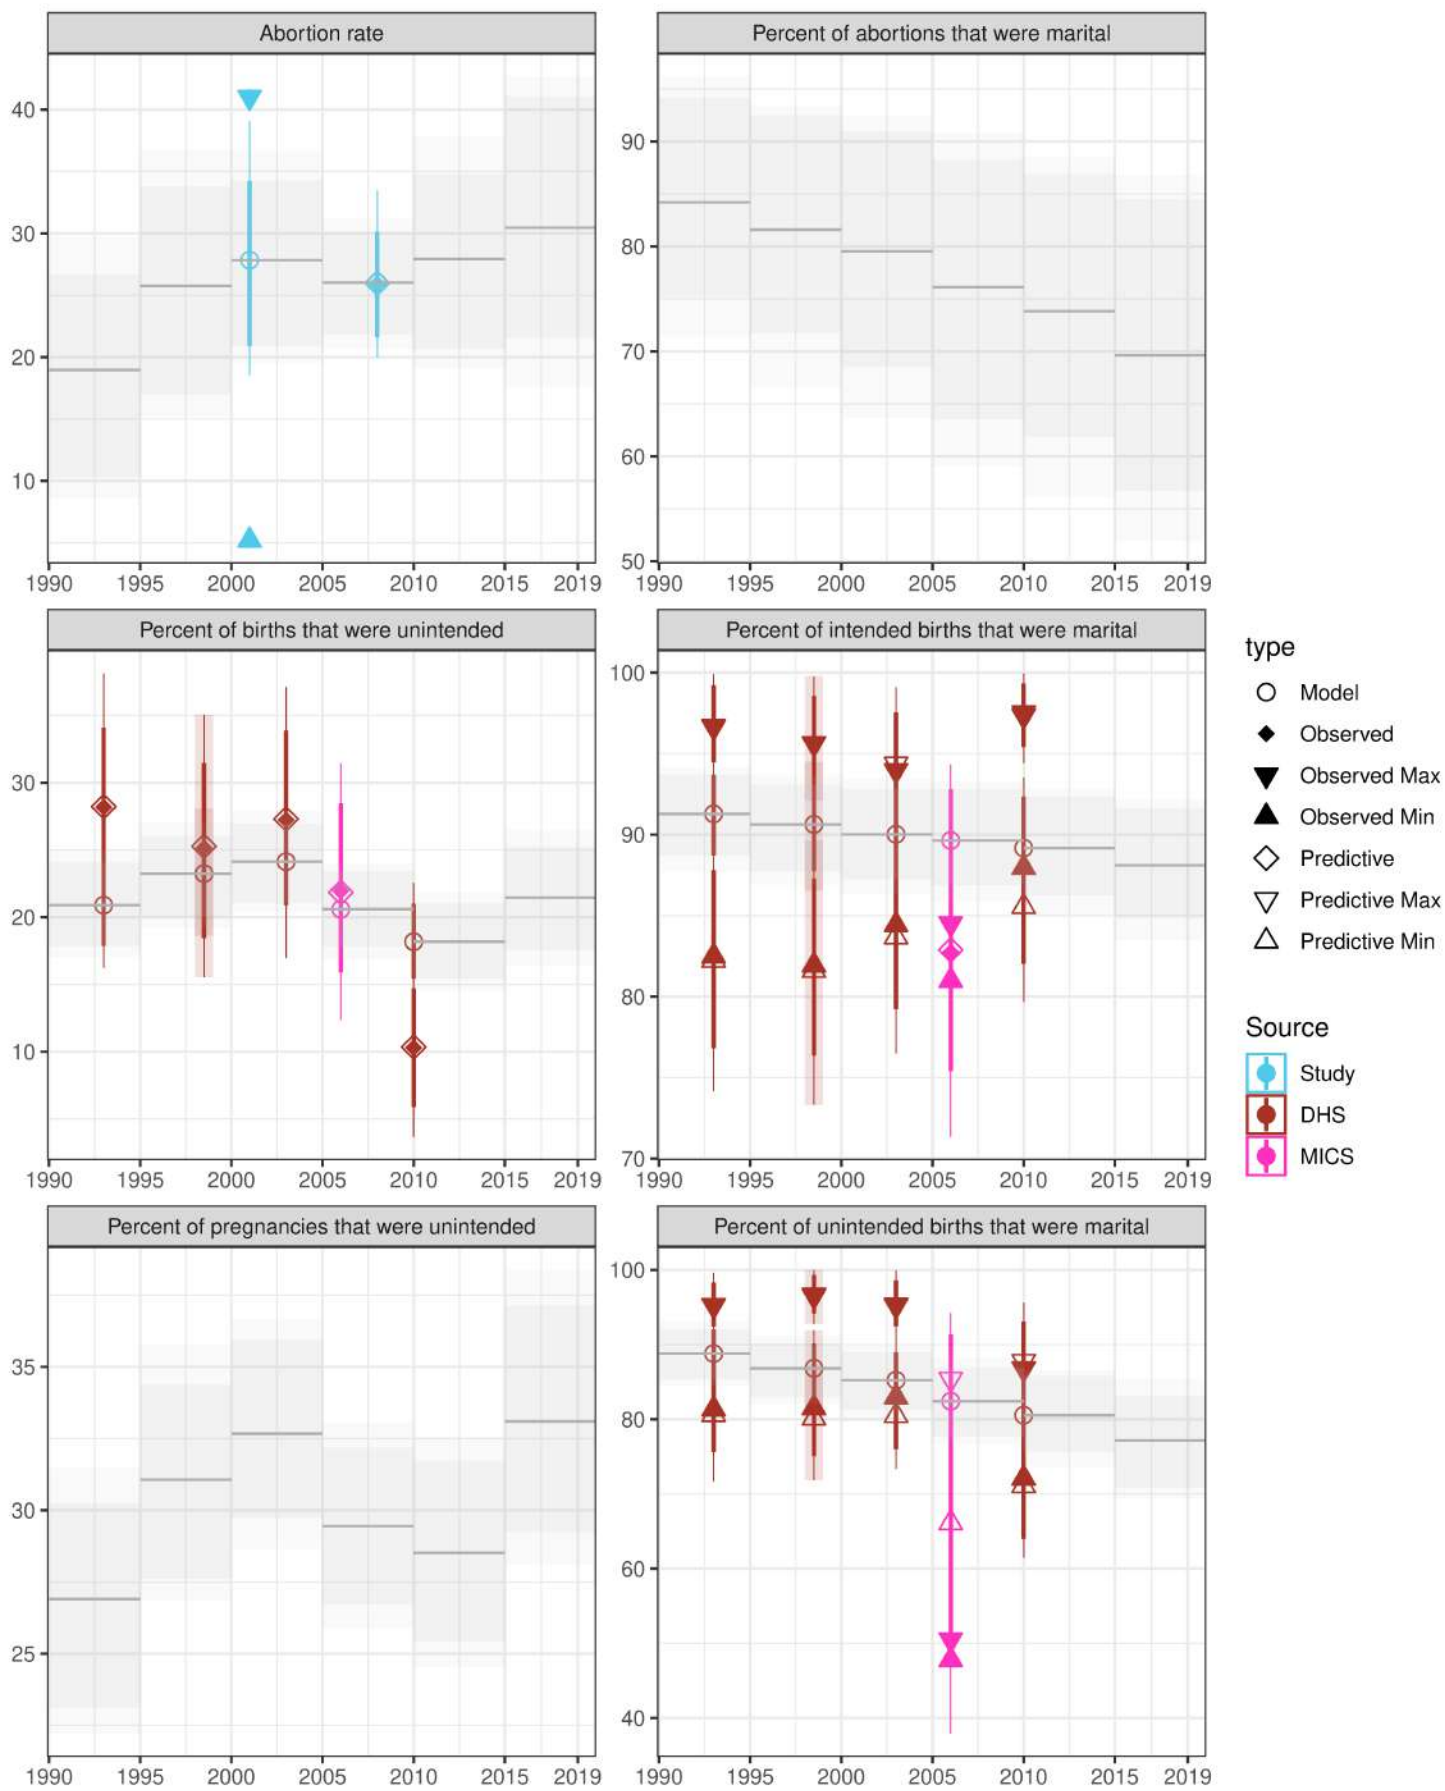

Note: Vertical lines and grey shading show 80% and 95% uncertainty intervals. Color shading shows when data were collected, if more than one year.

### Cabo Verde

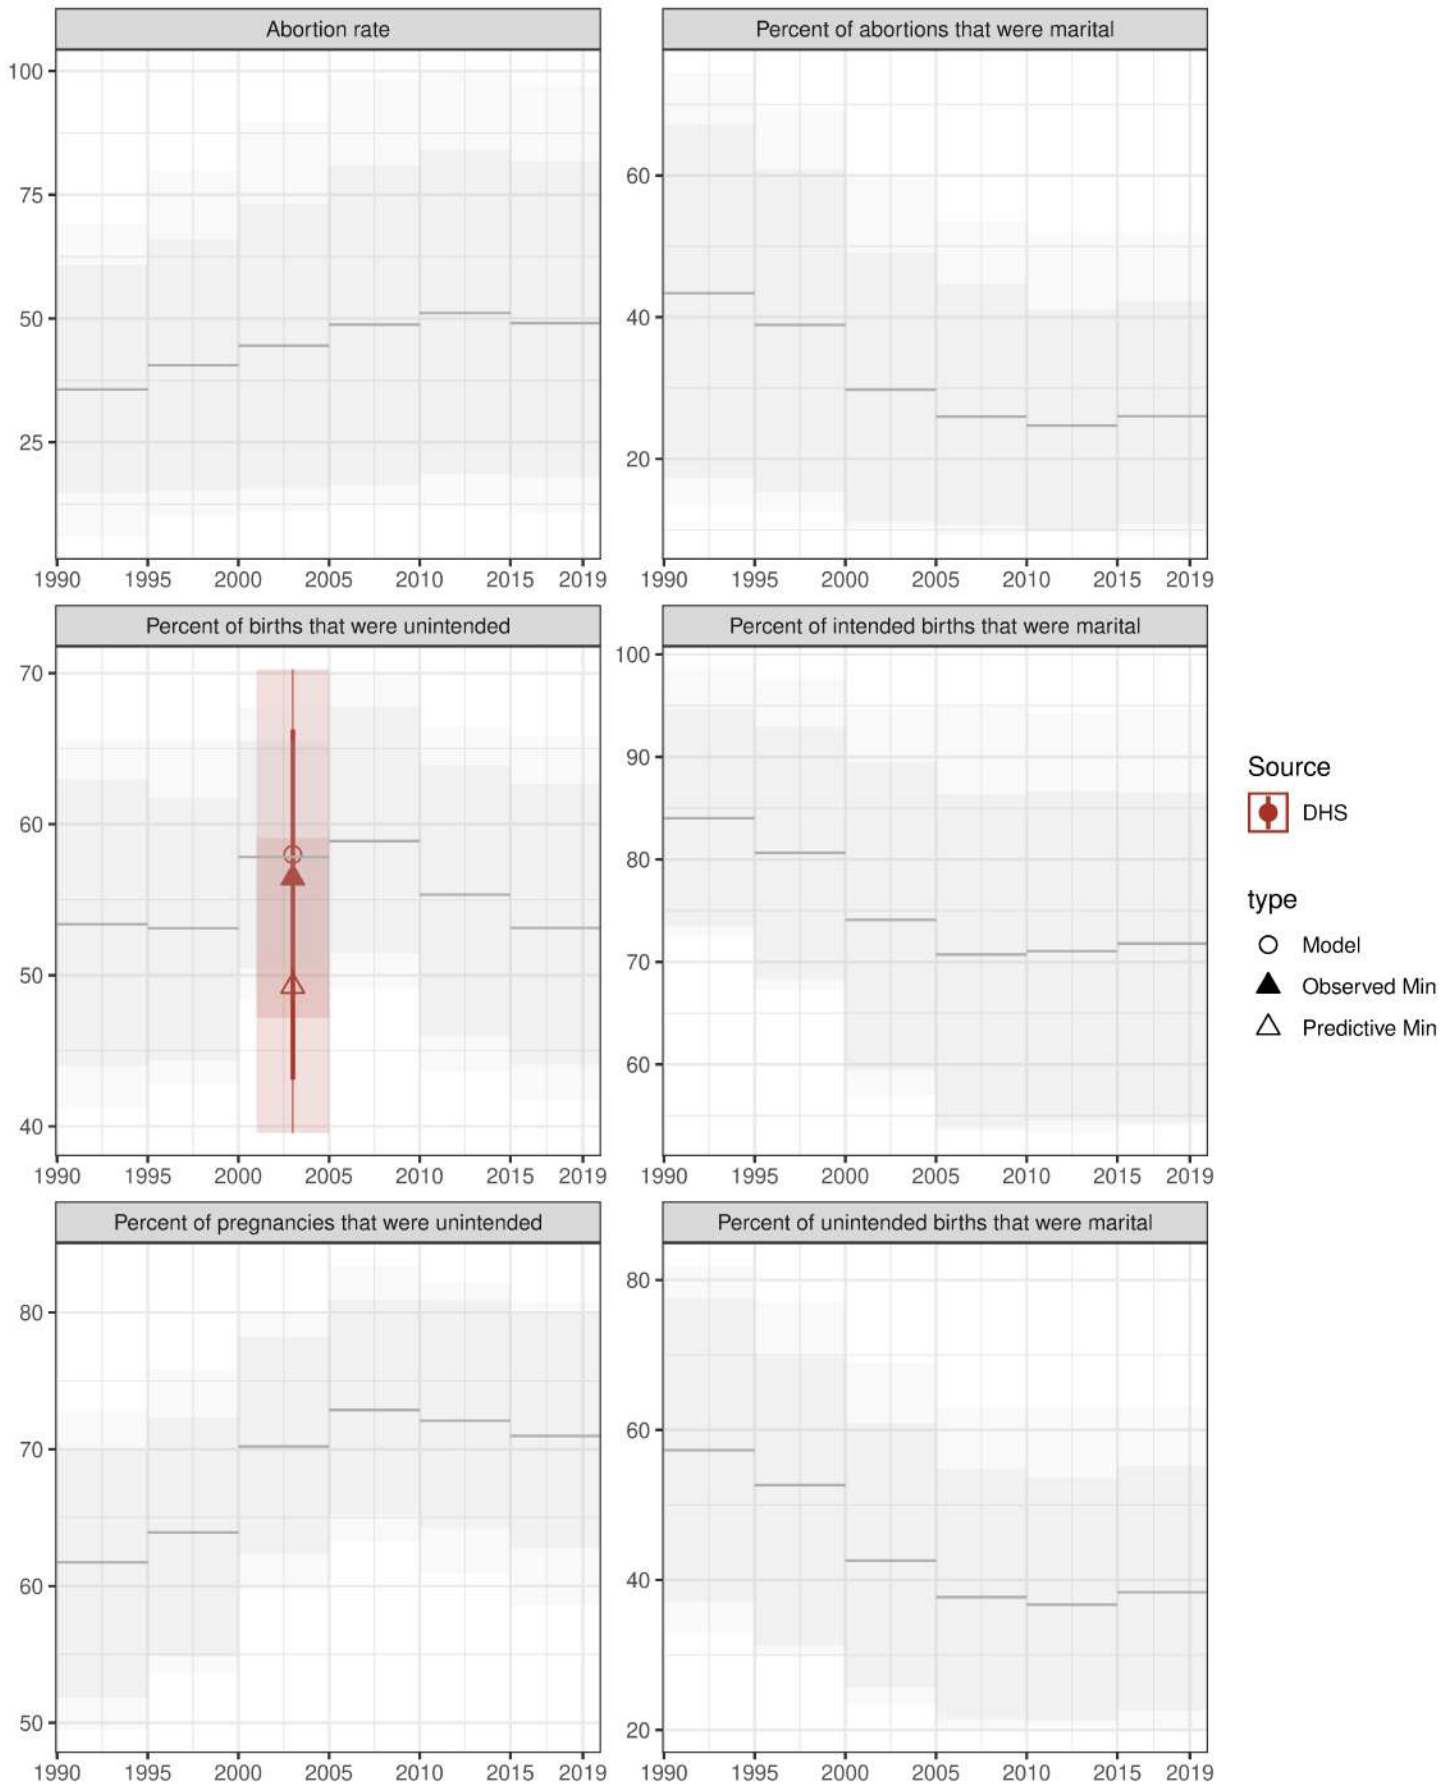

Note: Vertical lines and grey shading show 80% and 95% uncertainty intervals. Color shading shows when data were collected, if more than one year.

### Cote d'Ivoire

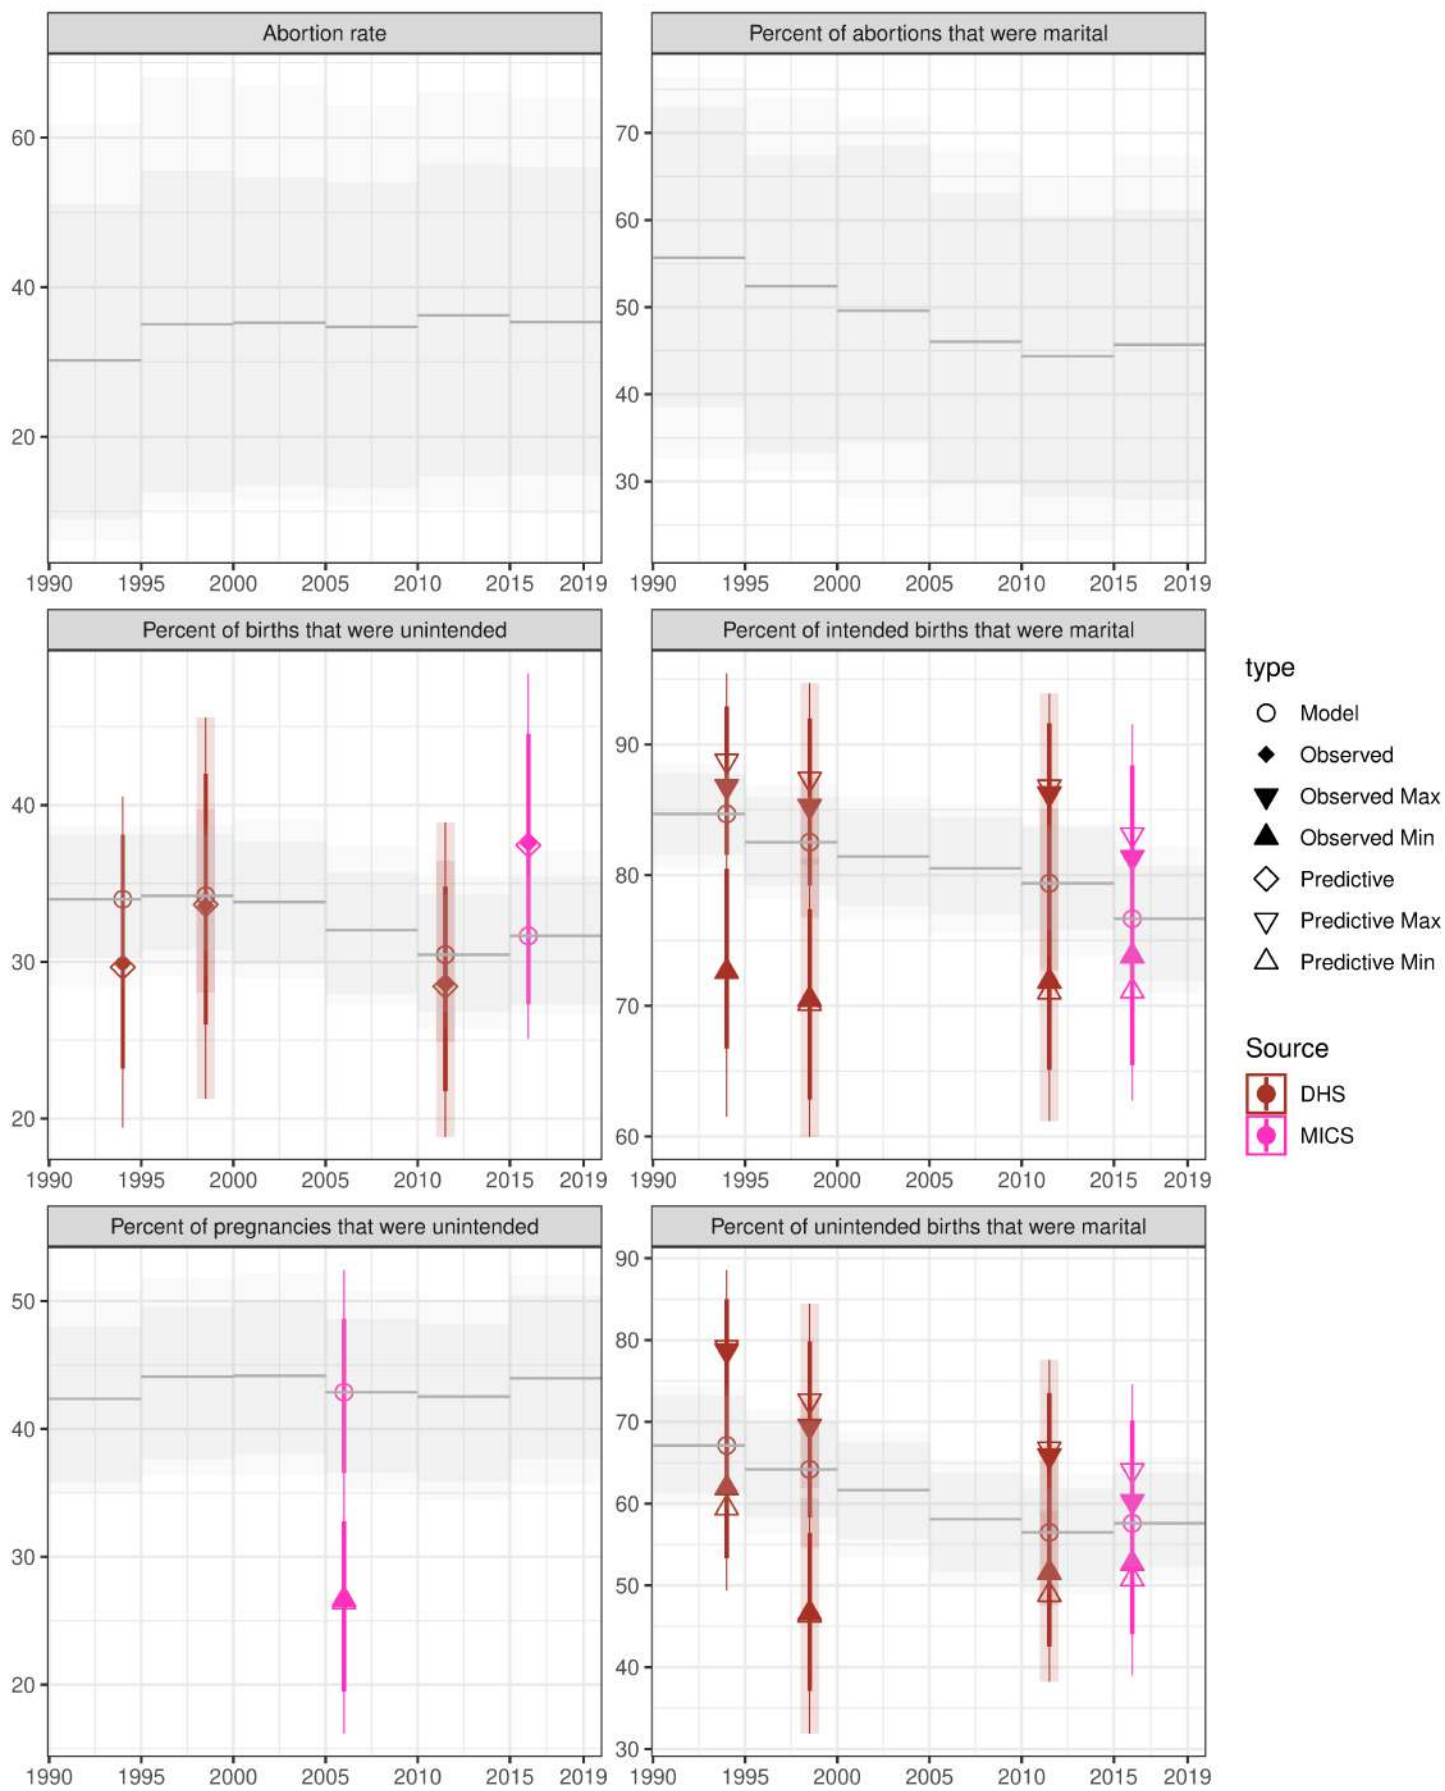

Note: Vertical lines and grey shading show 80% and 95% uncertainty intervals. Color shading shows when data were collected, if more than one year.

### Gambia

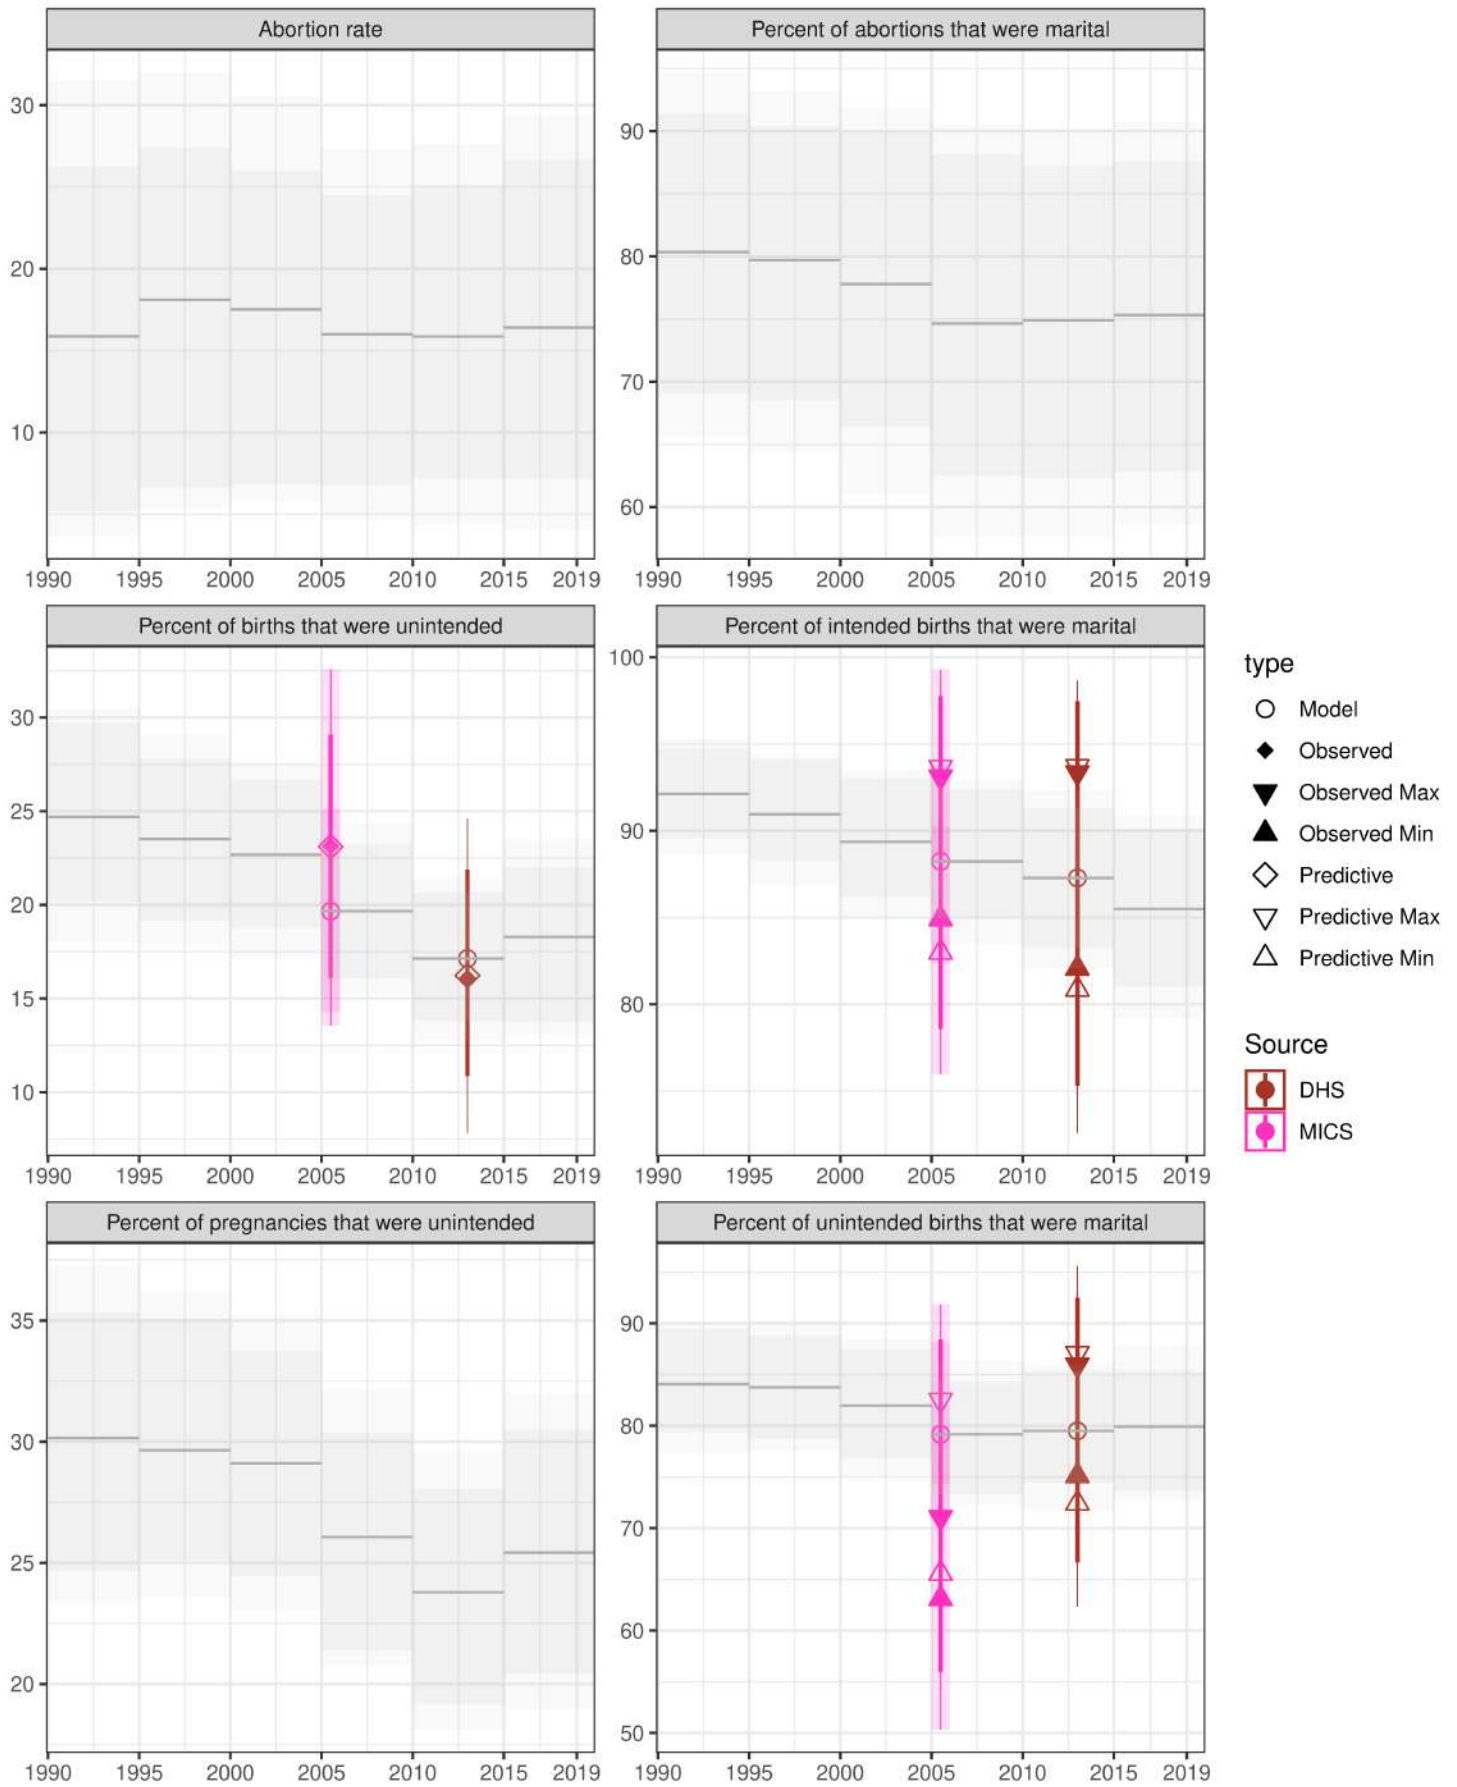

Note: Vertical lines and grey shading show 80% and 95% uncertainty intervals. Color shading shows when data were collected, if more than one year.

Ghana

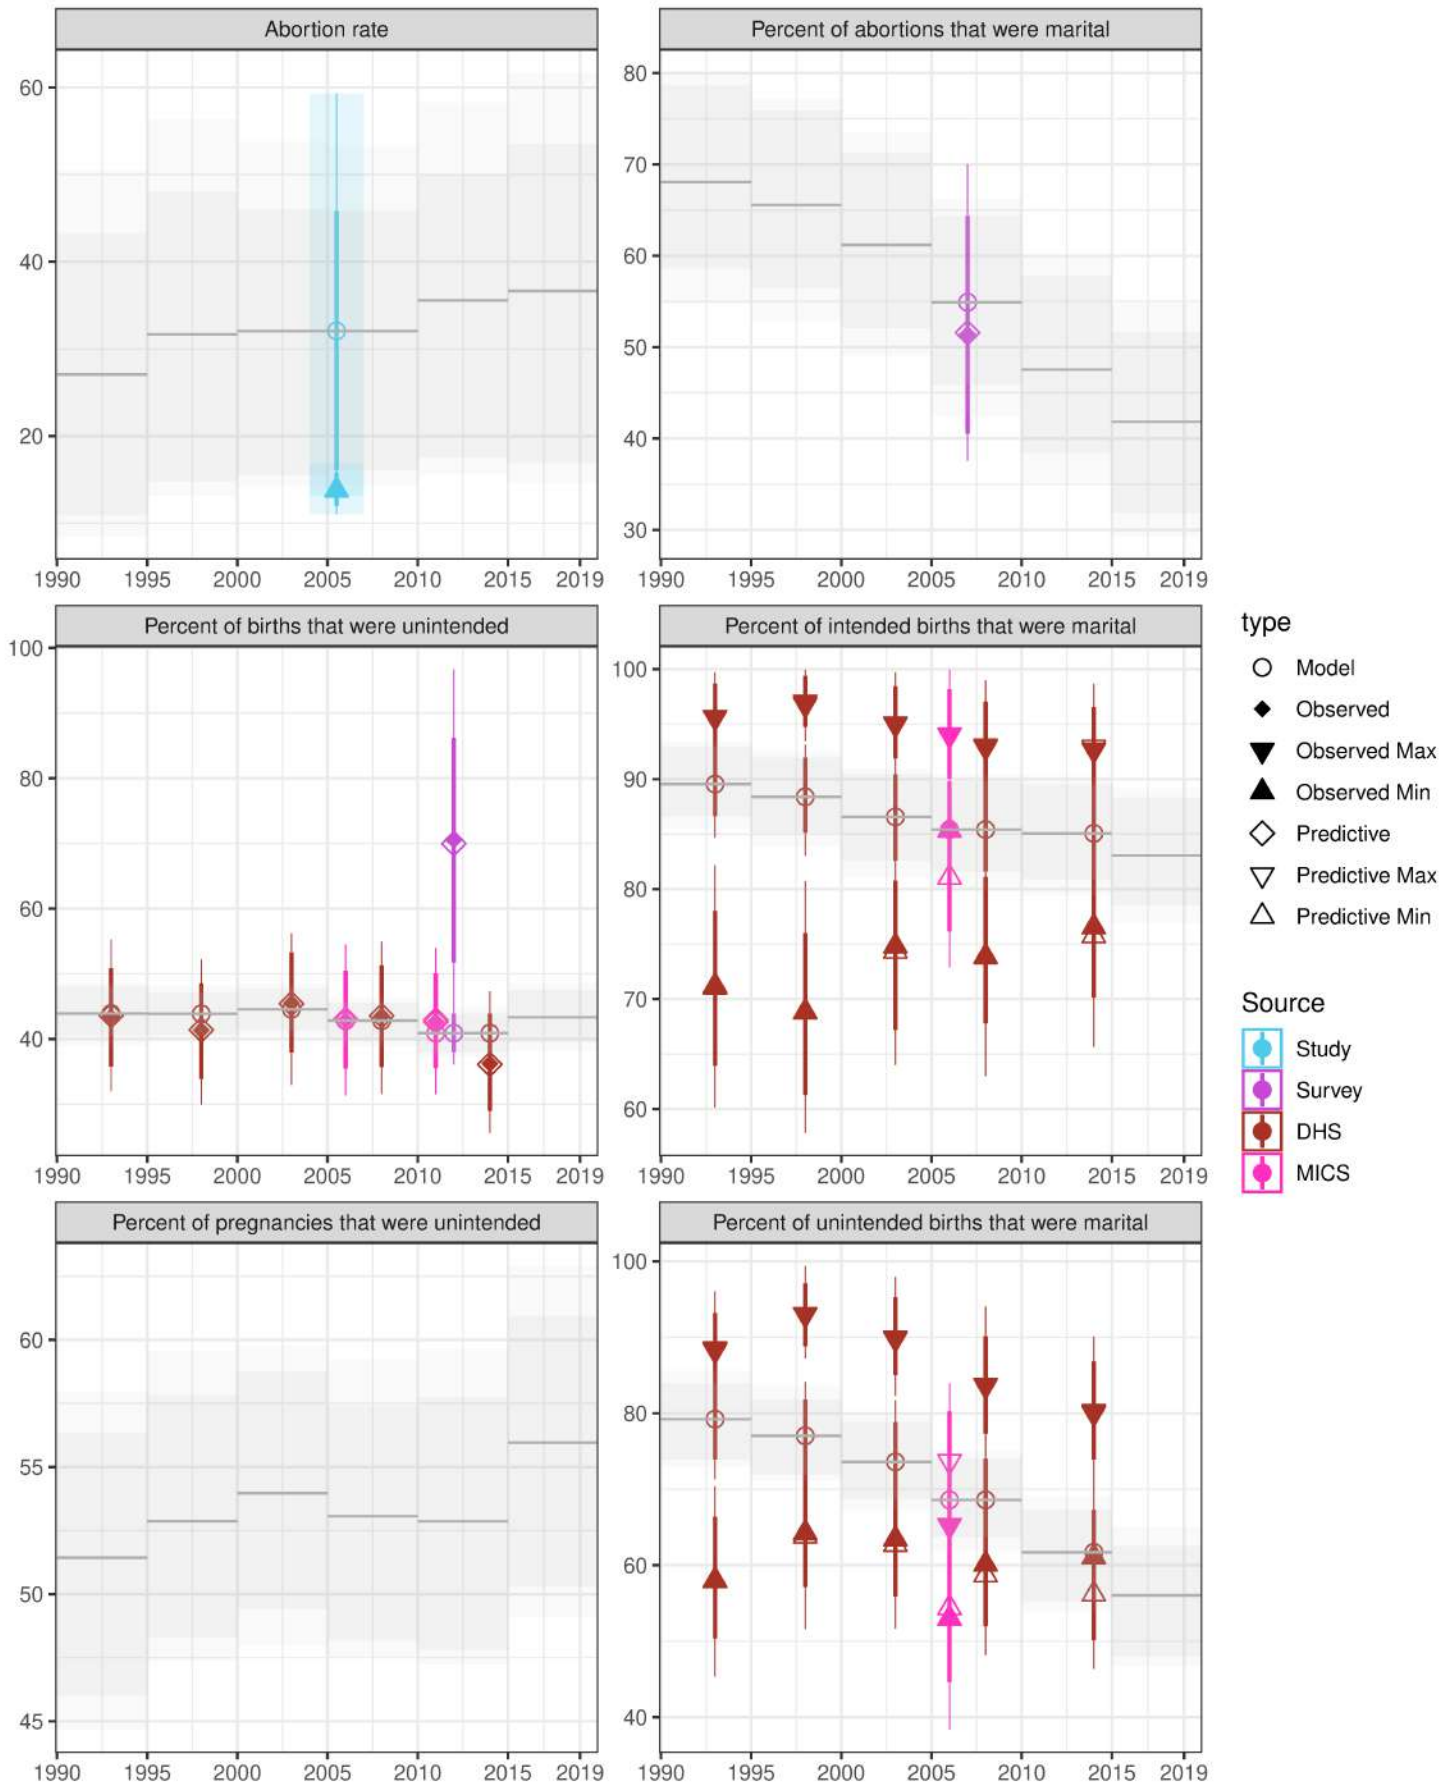

Note: Vertical lines and grey shading show 80% and 95% uncertainty intervals. Color shading shows when data were collected, if more than one year.

### Guinea

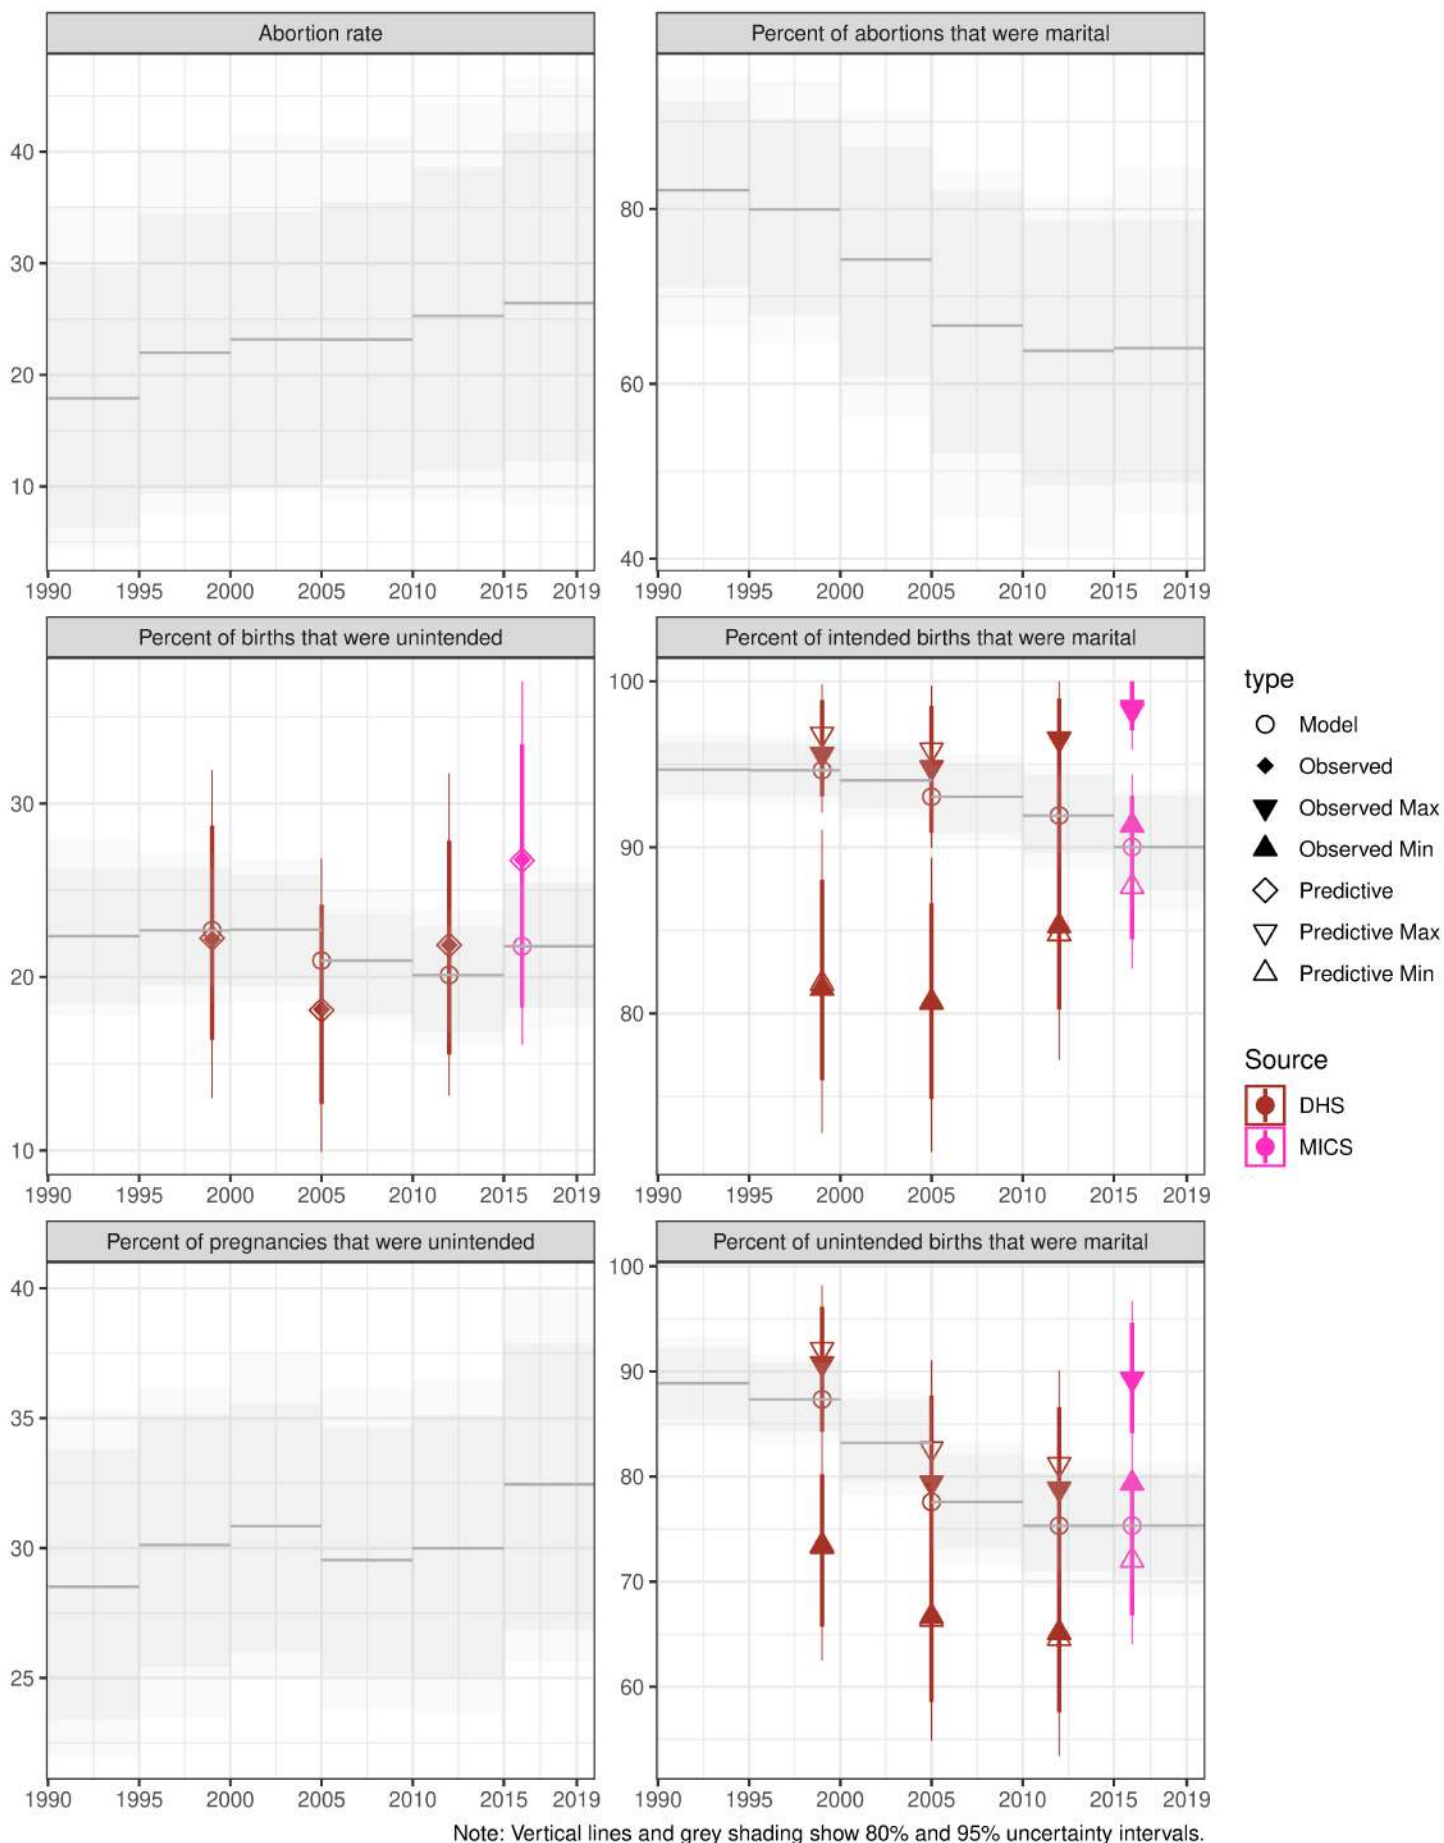

Note: Vertical lines and grey shading show 80% and 95% uncertainty intervals.

### Guinea-Bissau

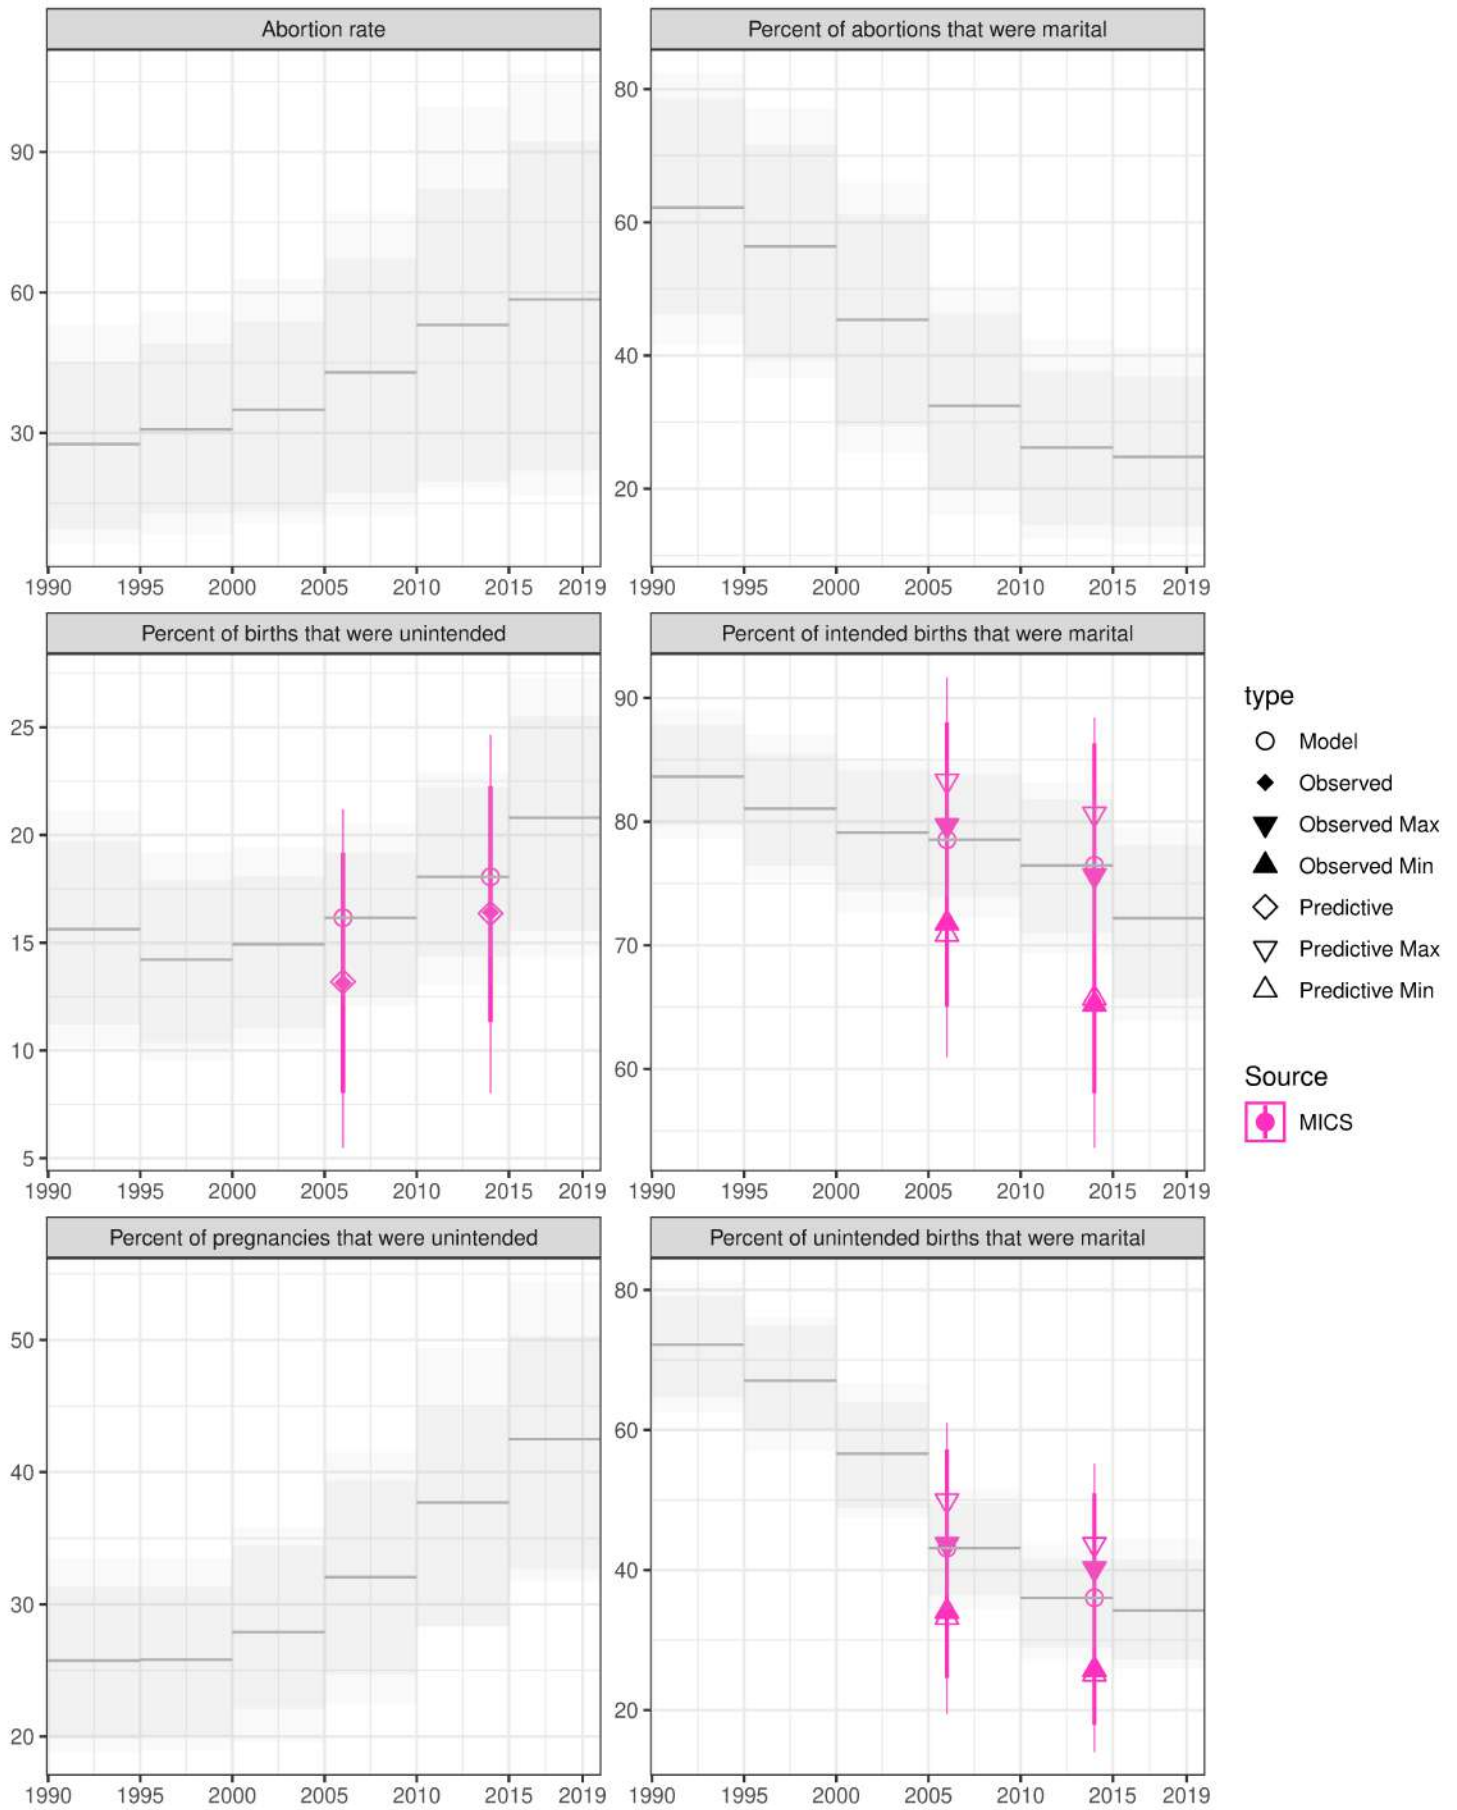

Note: Vertical lines and grey shading show 80% and 95% uncertainty intervals.



### Liberia

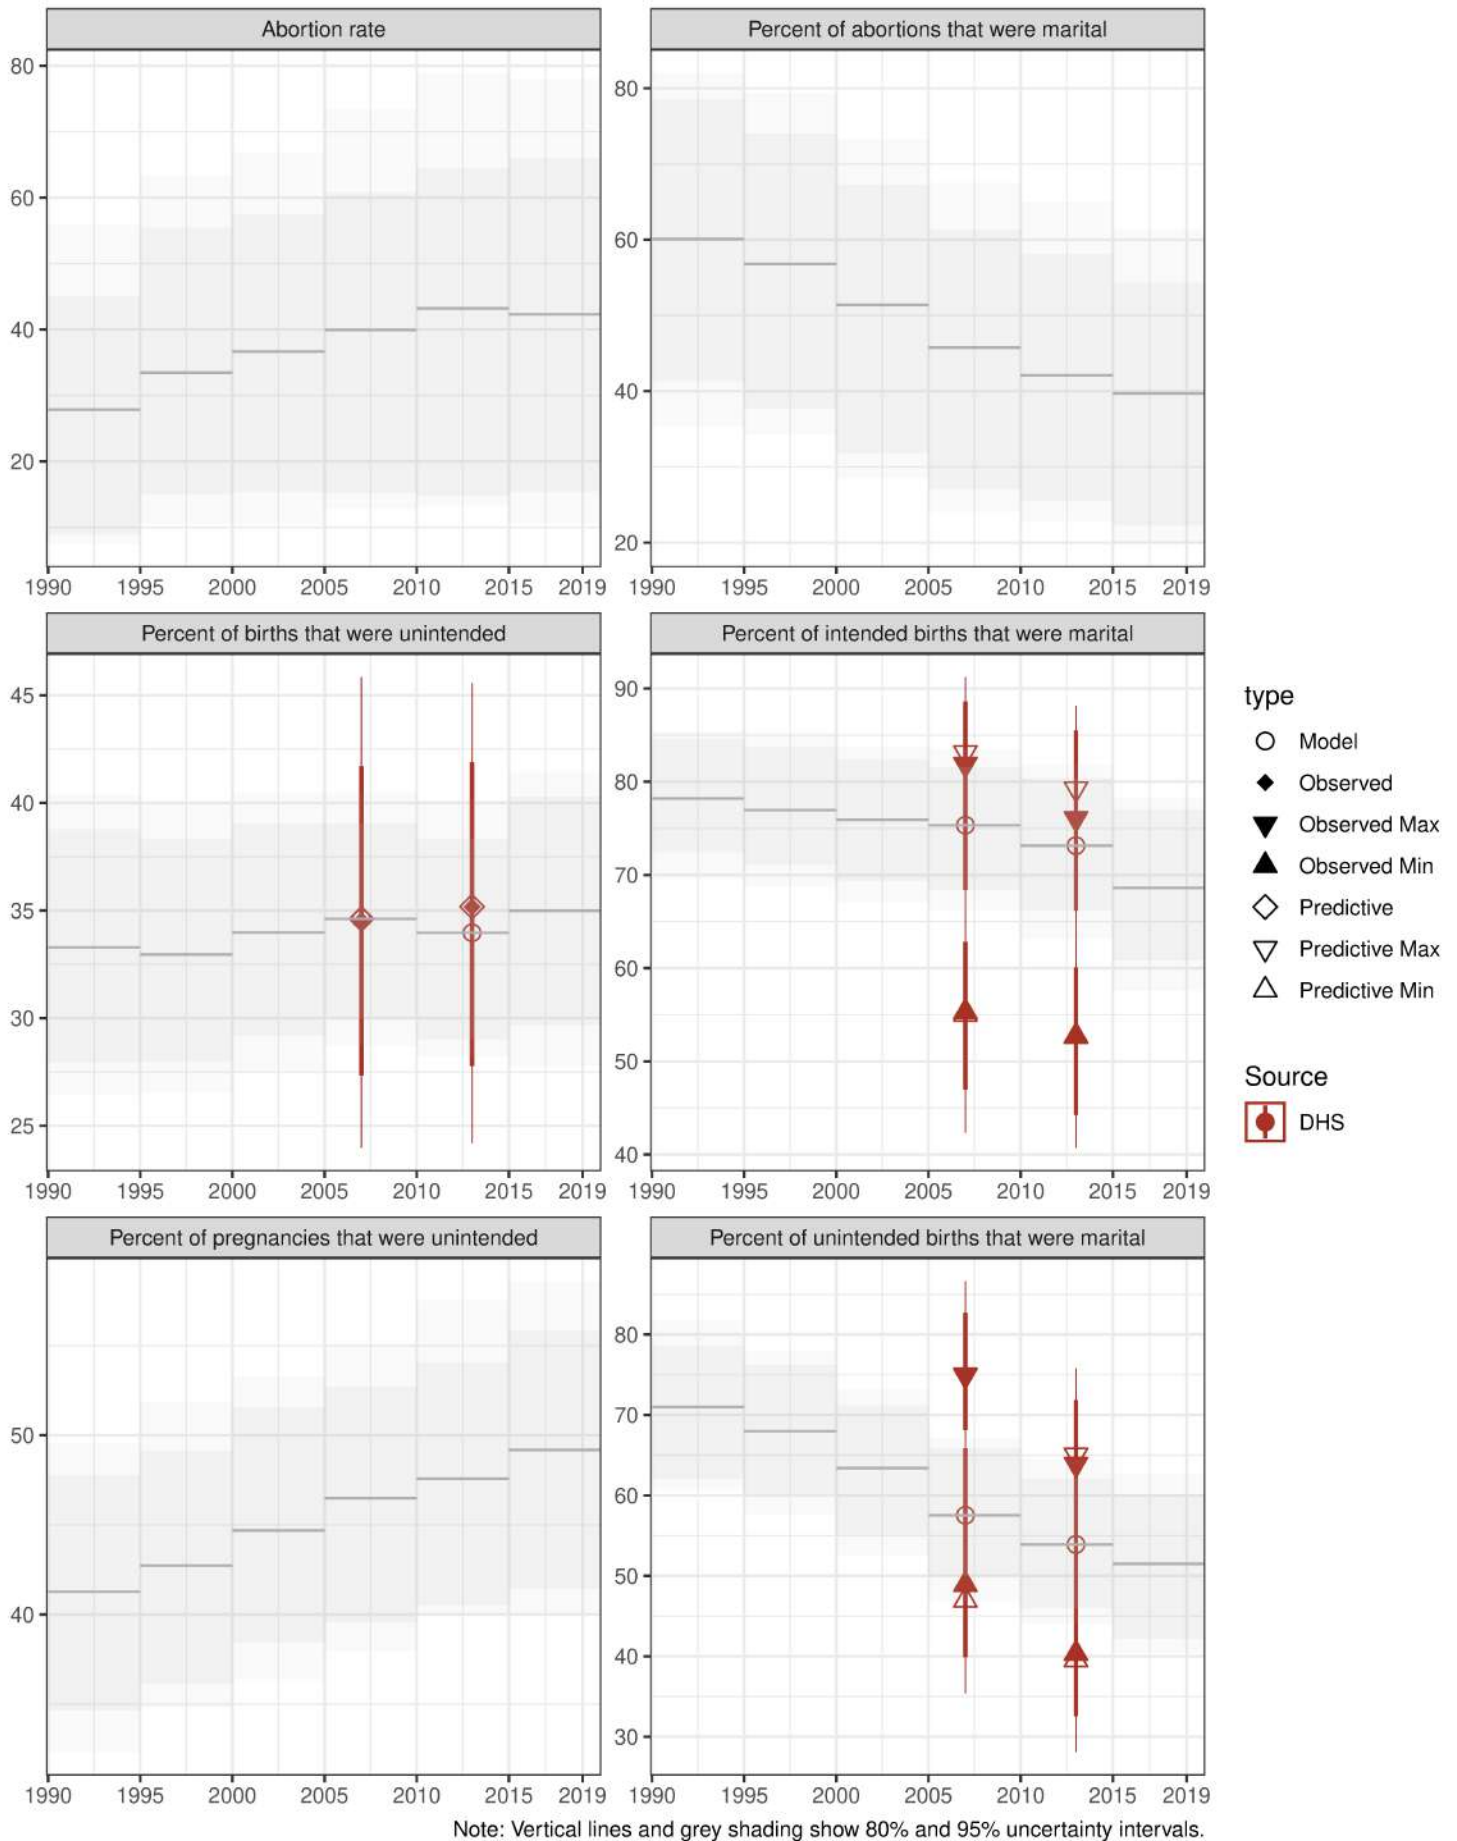

Note: Vertical lines and grey shading show 80% and 95% uncertainty intervals.

Mali

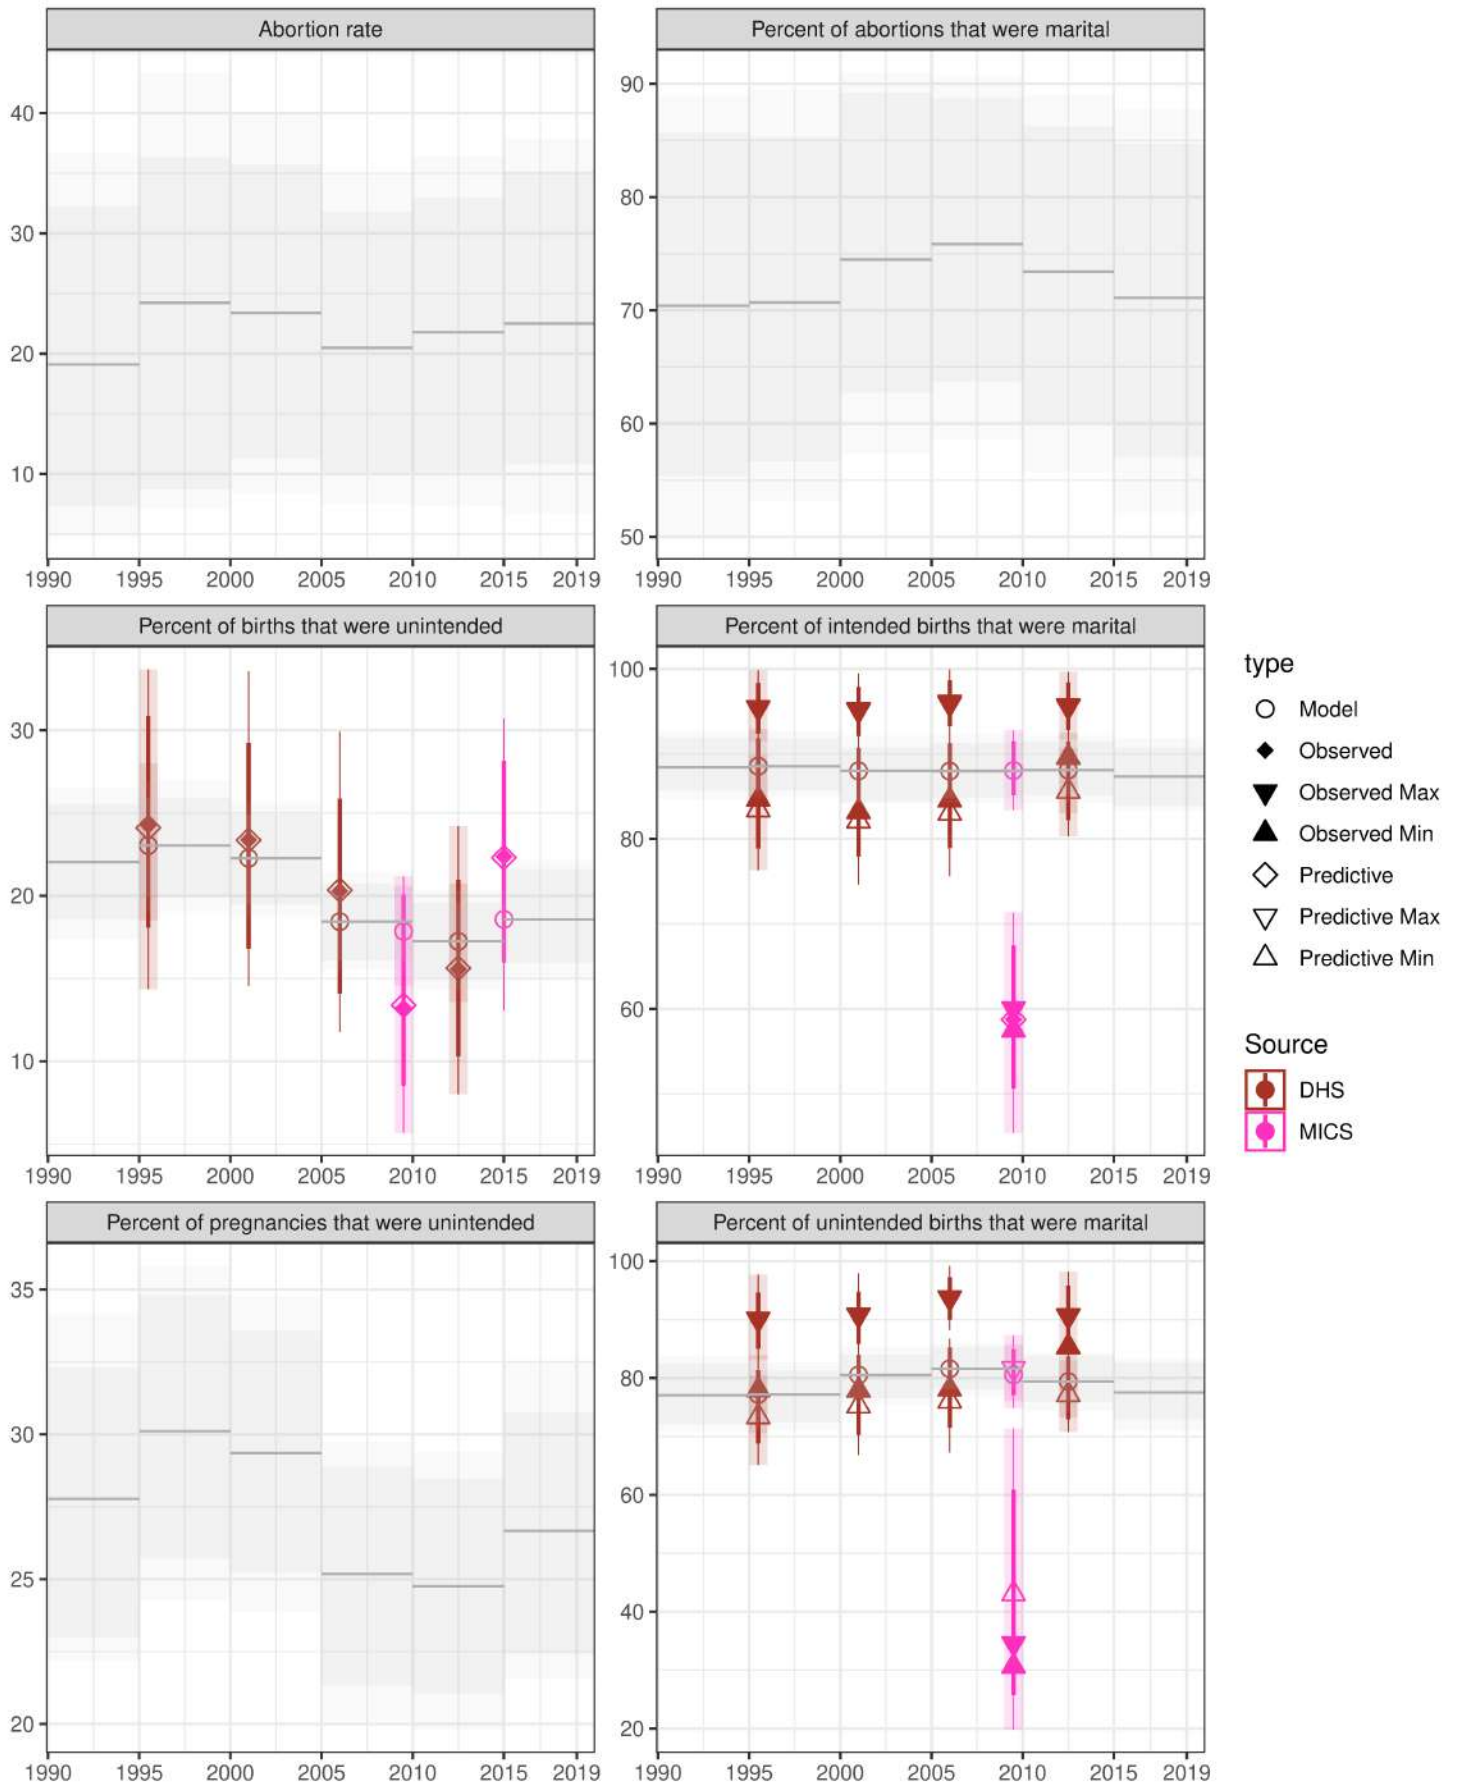

Note: Vertical lines and grey shading show 80% and 95% uncertainty intervals. Color shading shows when data were collected, if more than one year.

### Mauritania

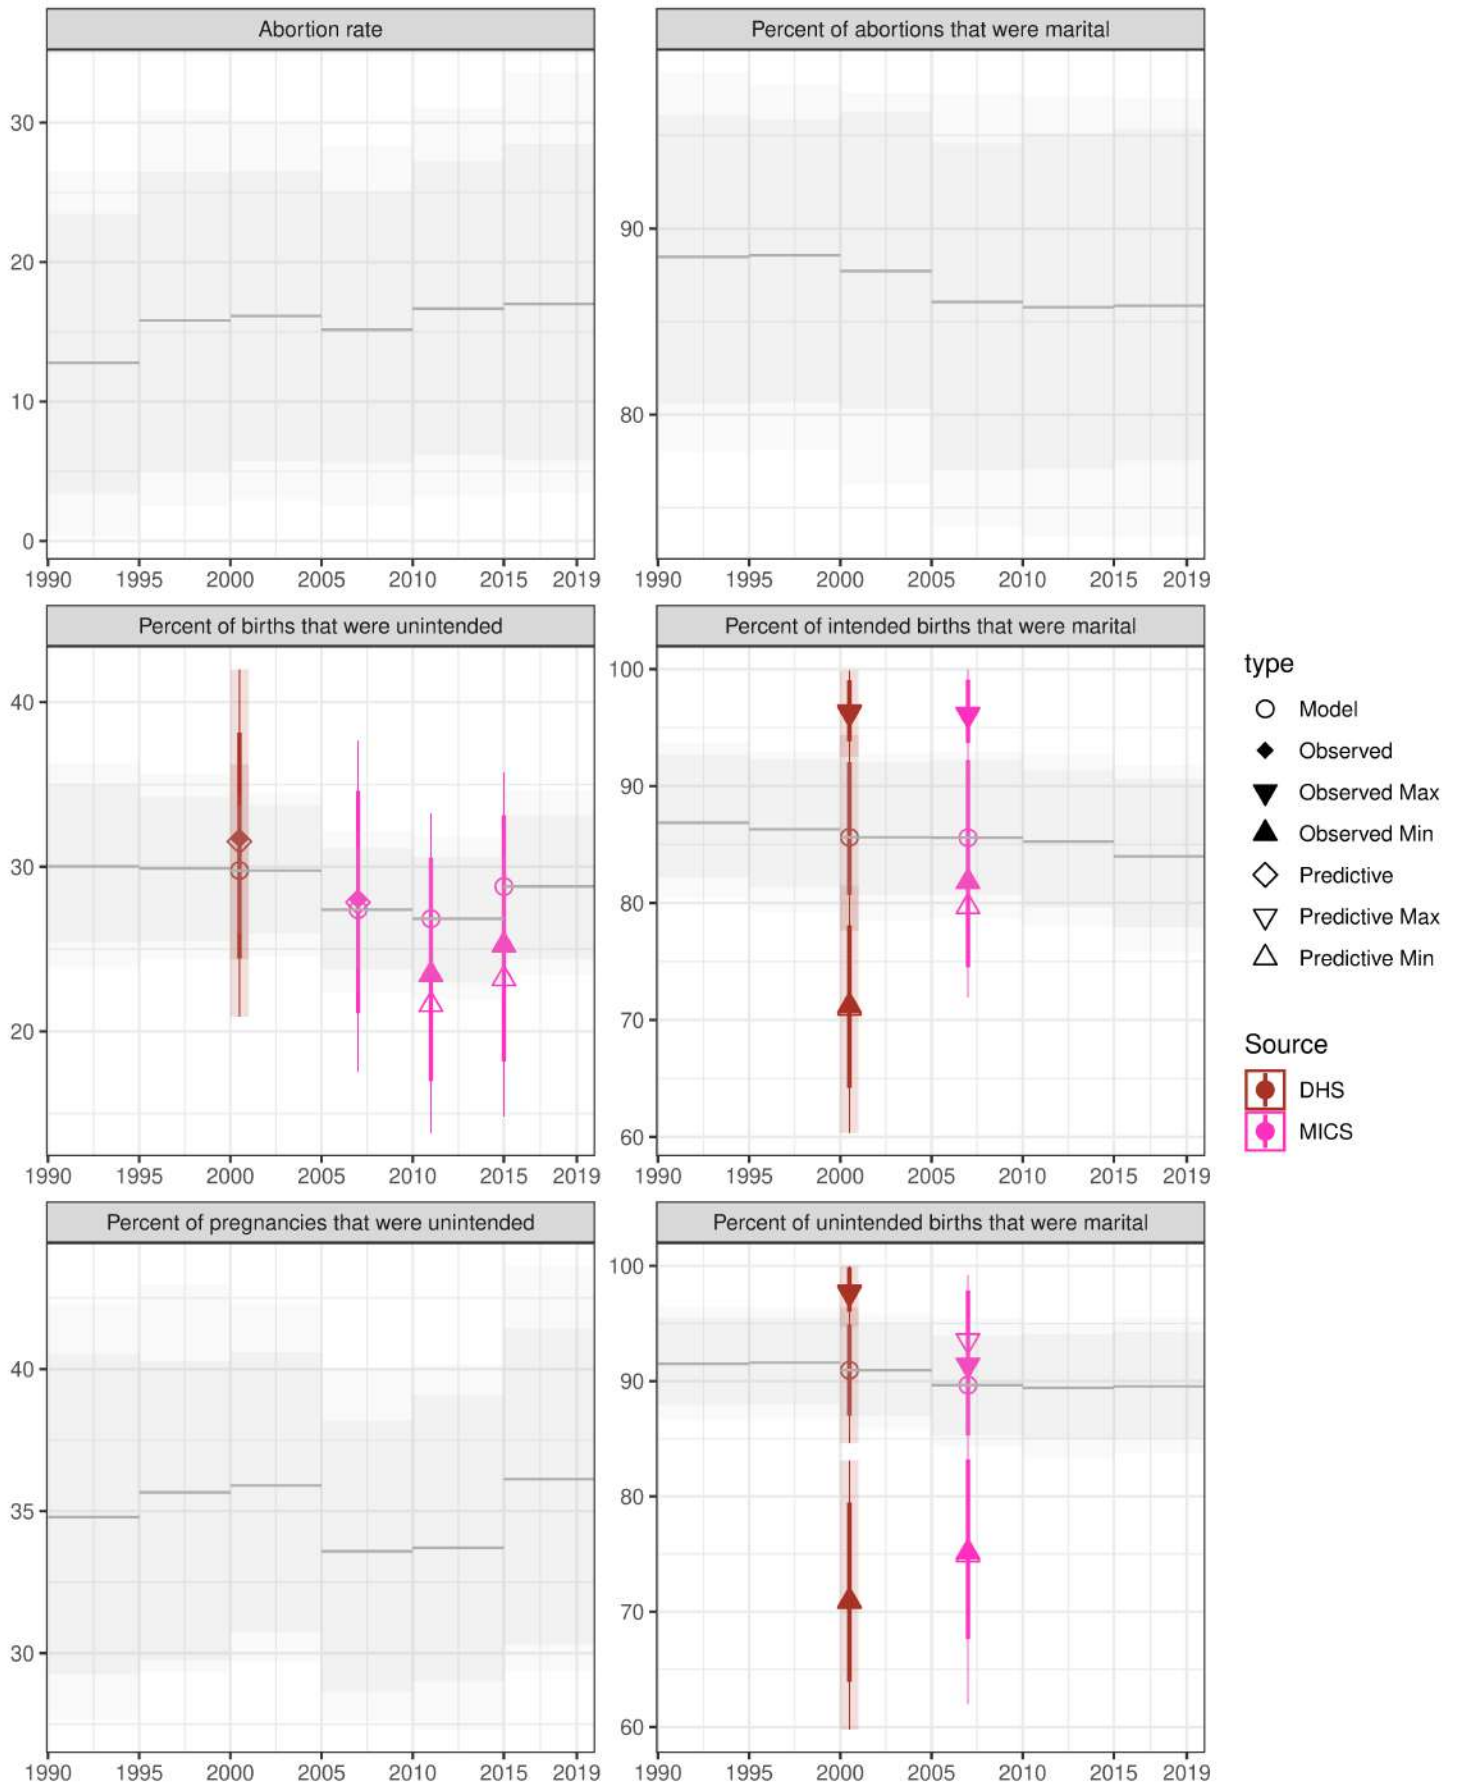

Note: Vertical lines and grey shading show 80% and 95% uncertainty intervals. Color shading shows when data were collected, if more than one year.

### Niger

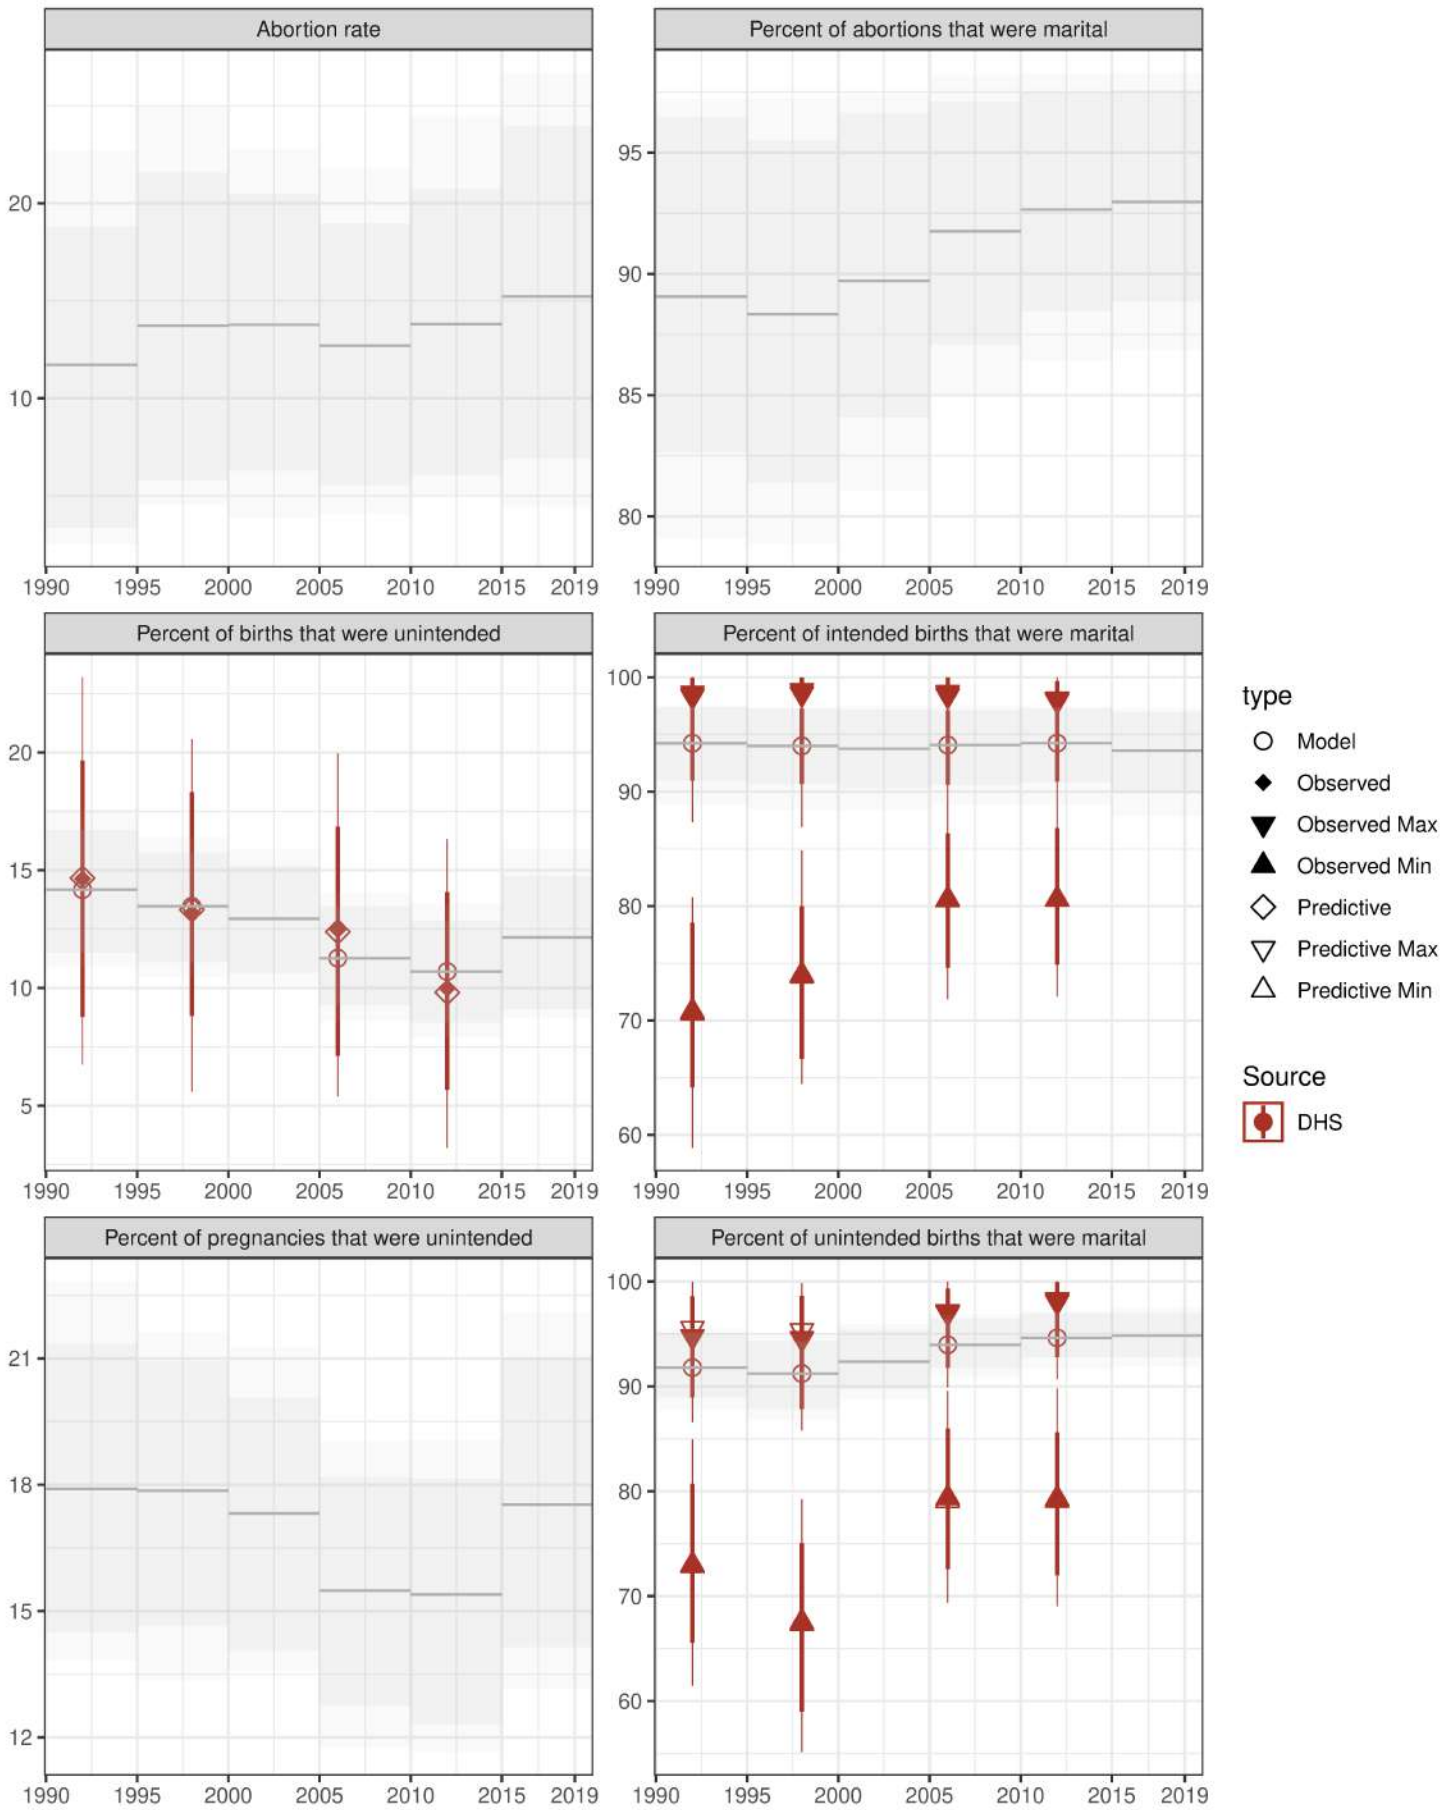

Note: Vertical lines and grey shading show 80% and 95% uncertainty intervals.

### Nigeria

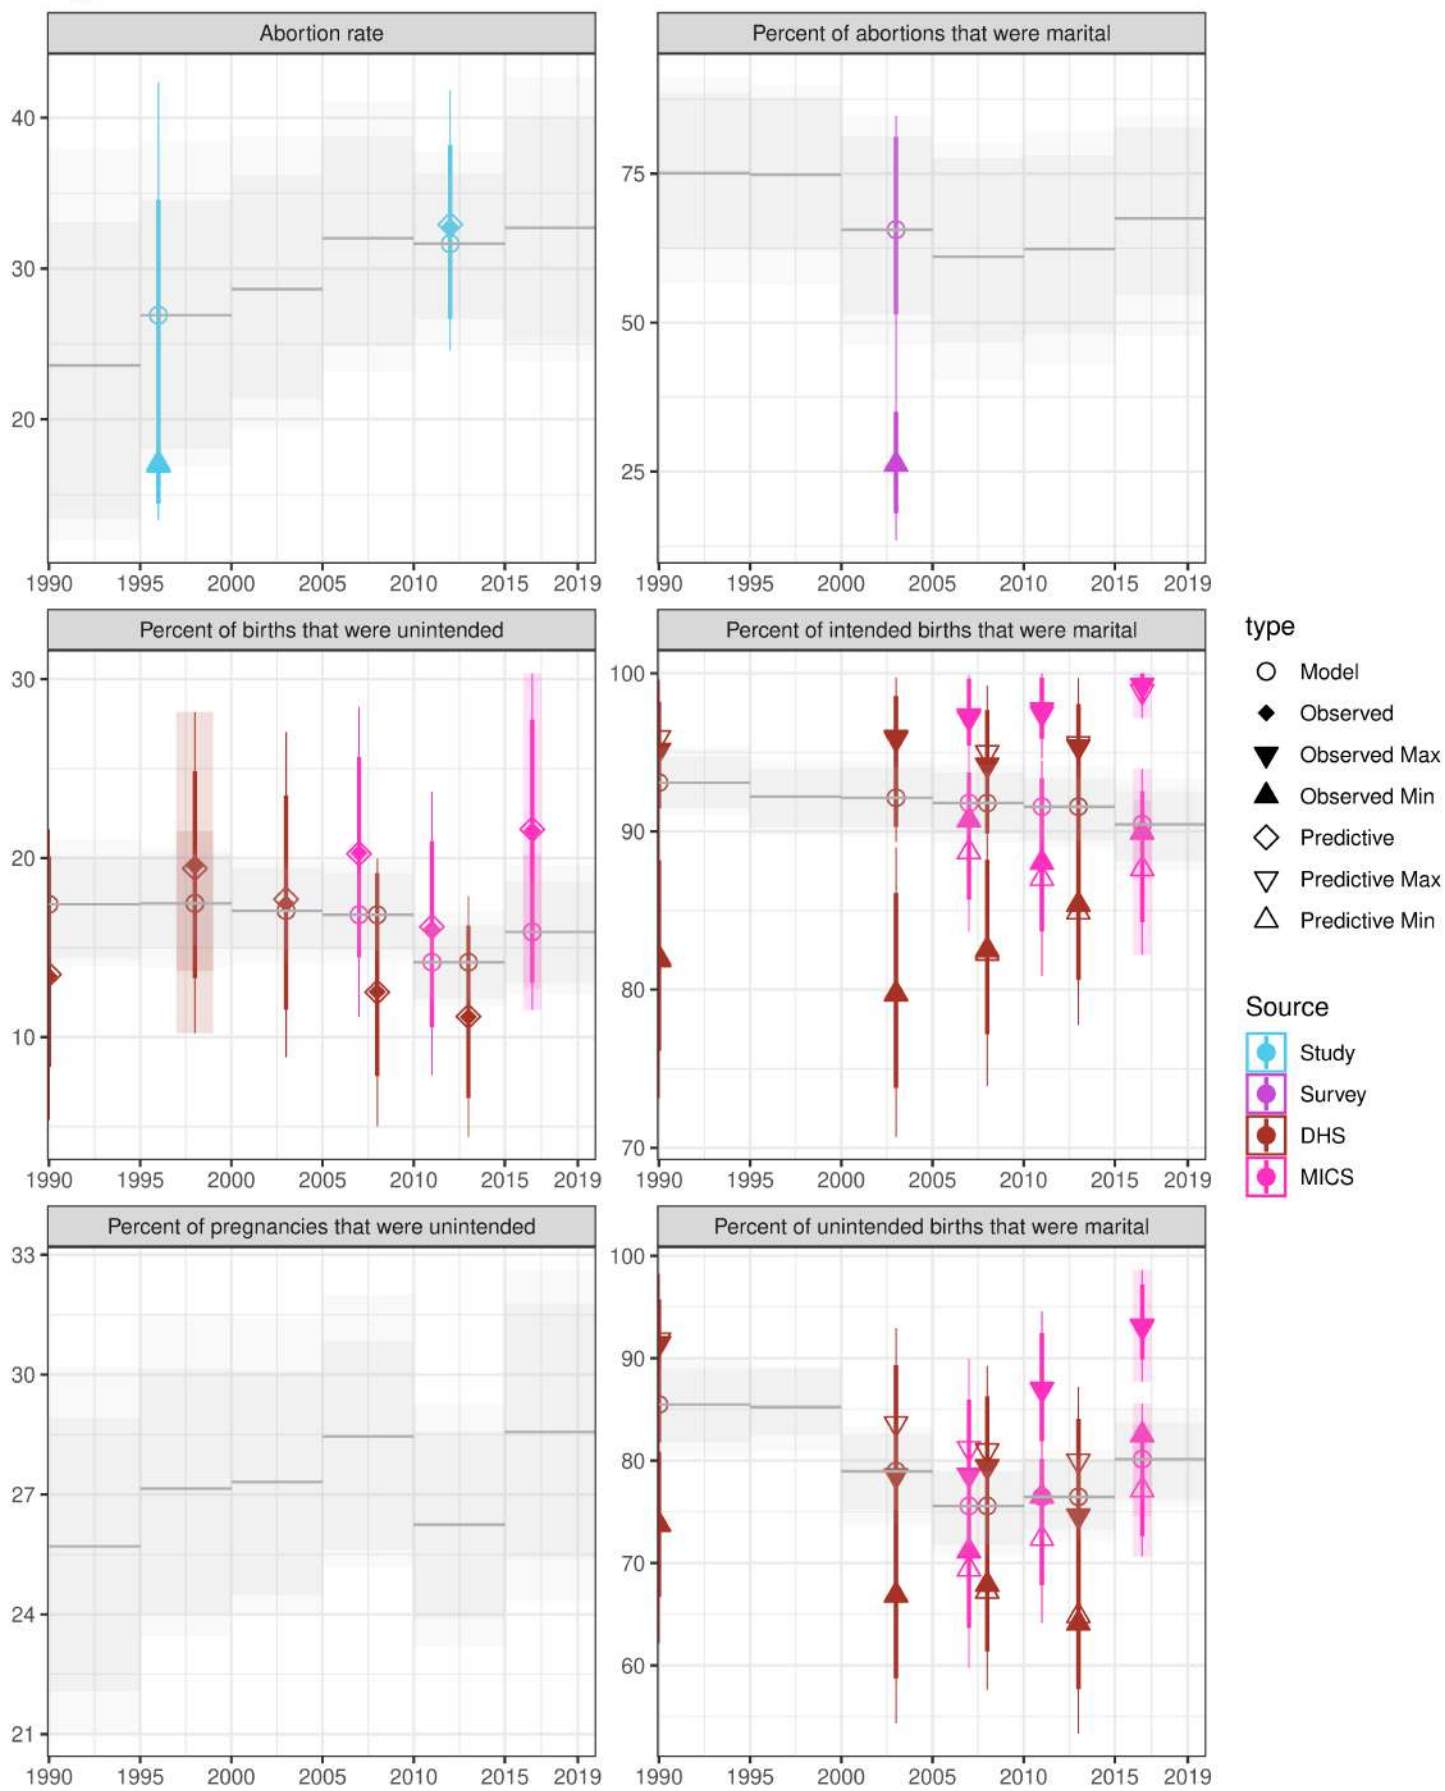

Note: Vertical lines and grey shading show 80% and 95% uncertainty intervals. Color shading shows when data were collected, if more than one year.

### Senegal

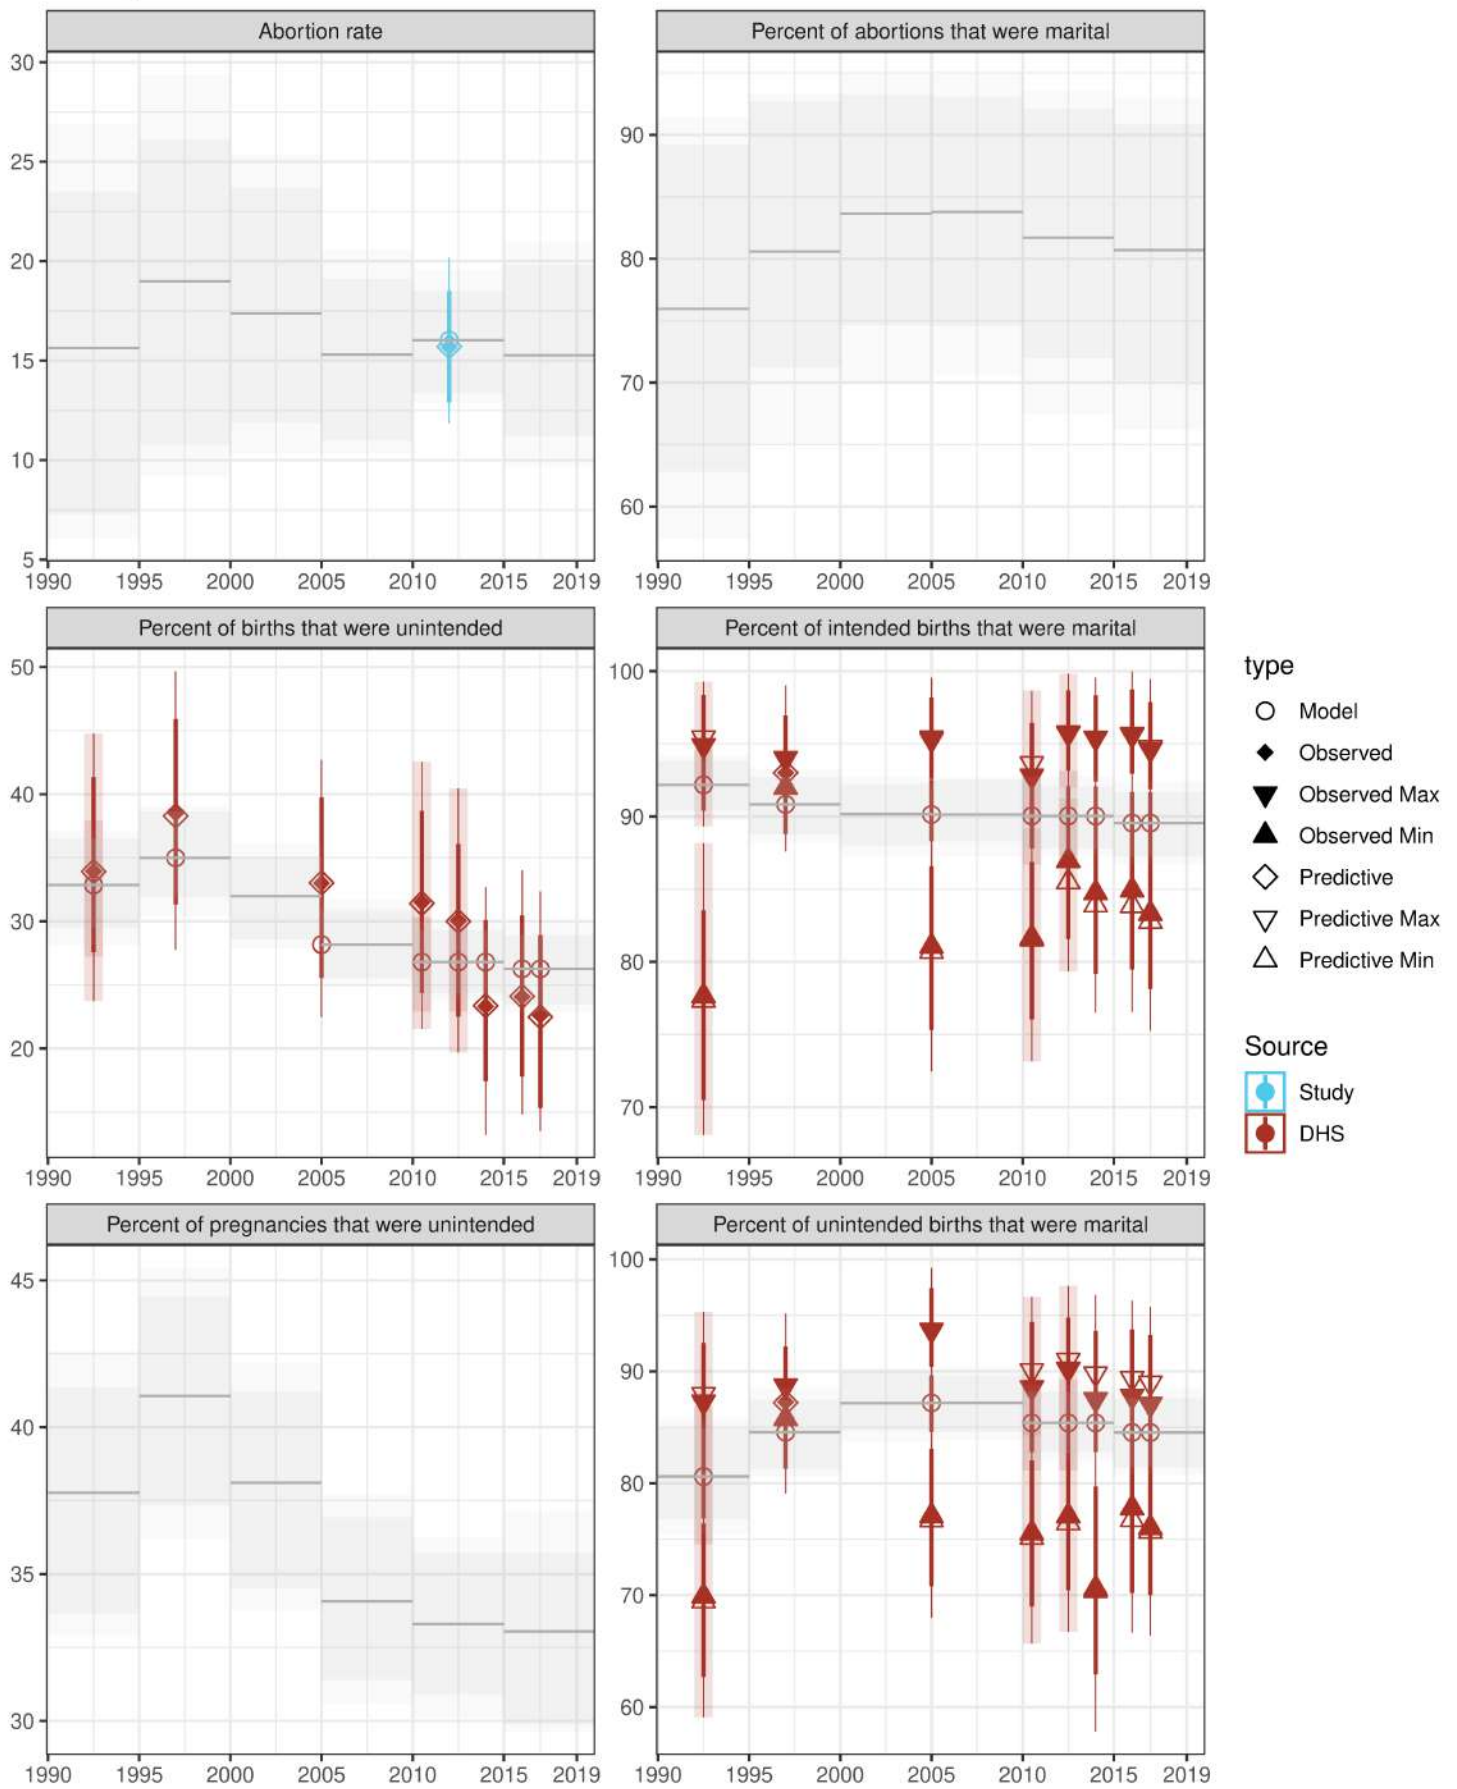

Note: Vertical lines and grey shading show 80% and 95% uncertainty intervals. Color shading shows when data were collected, if more than one year.

### Sierra Leone

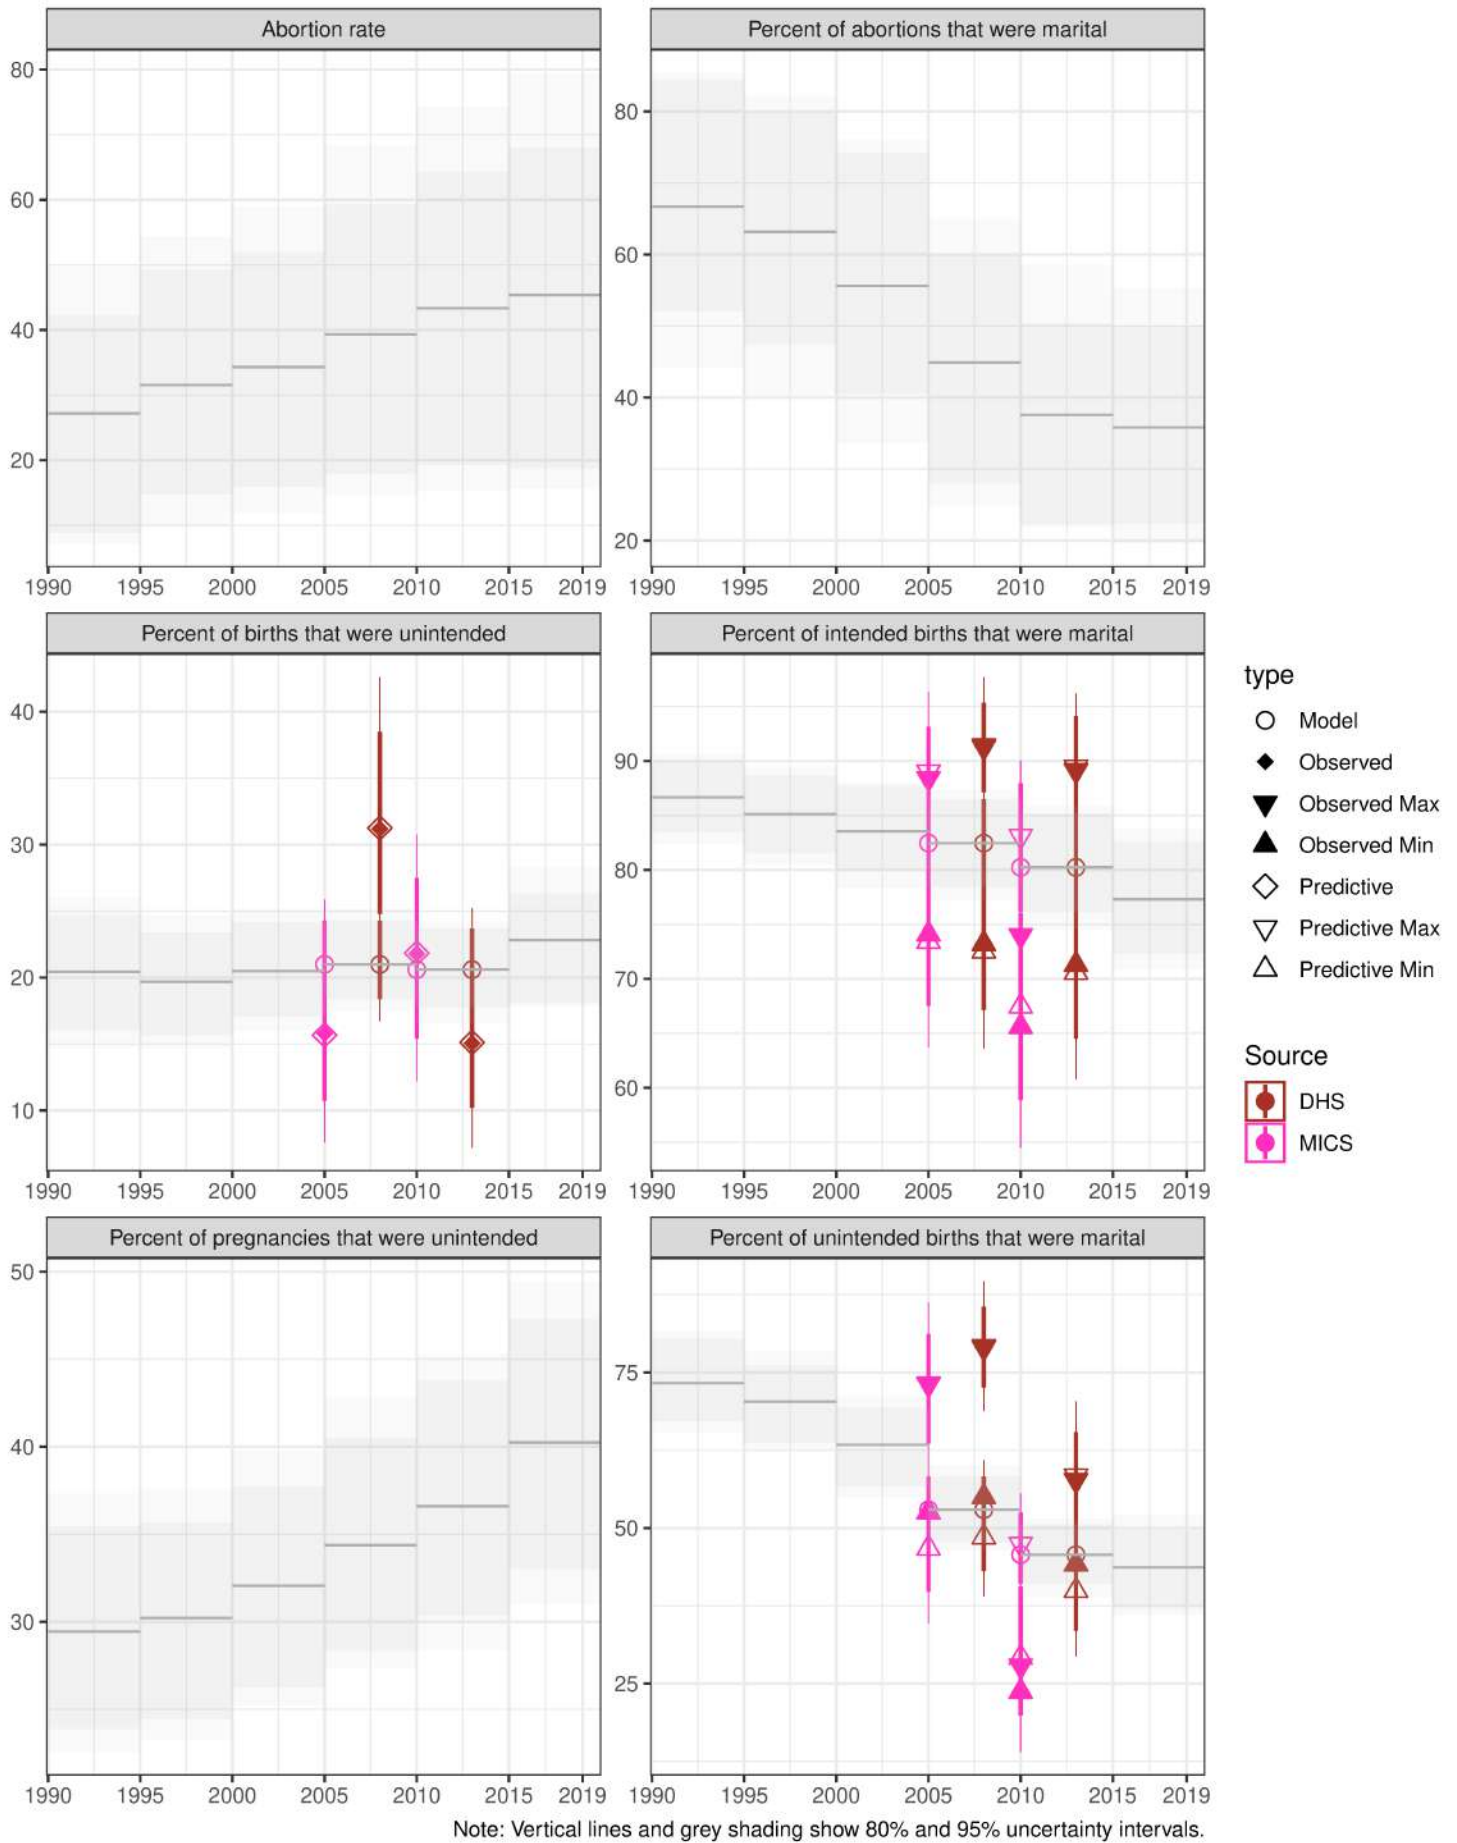

Note: Vertical lines and grey shading show 80% and 95% uncertainty intervals.

### Togo

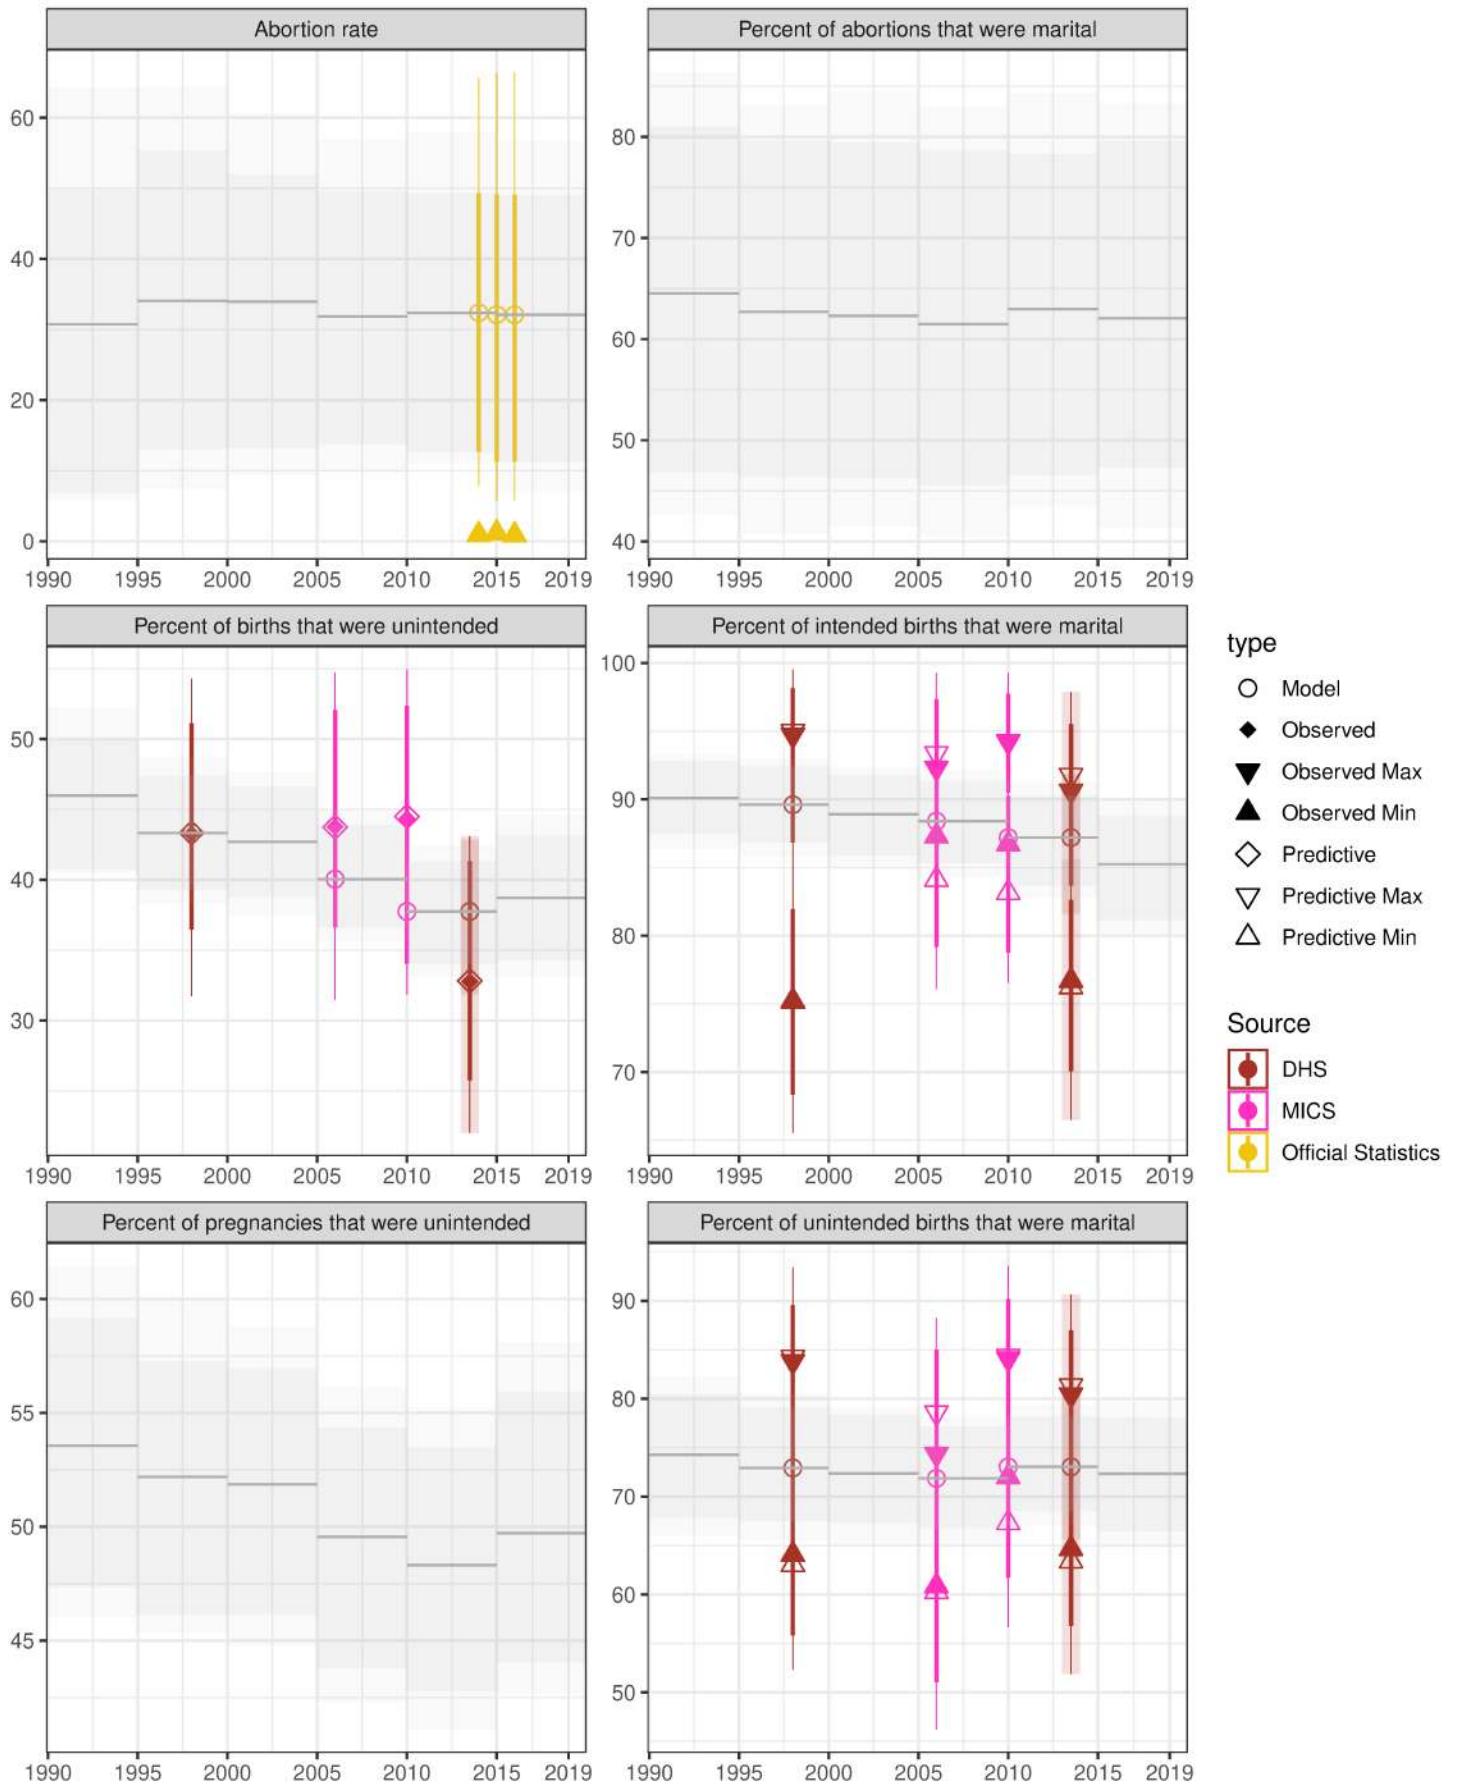

Note: Vertical lines and grey shading show 80% and 95% uncertainty intervals. Color shading shows when data were collected, if more than one year.



### 1.3 Middle Africa

### Angola

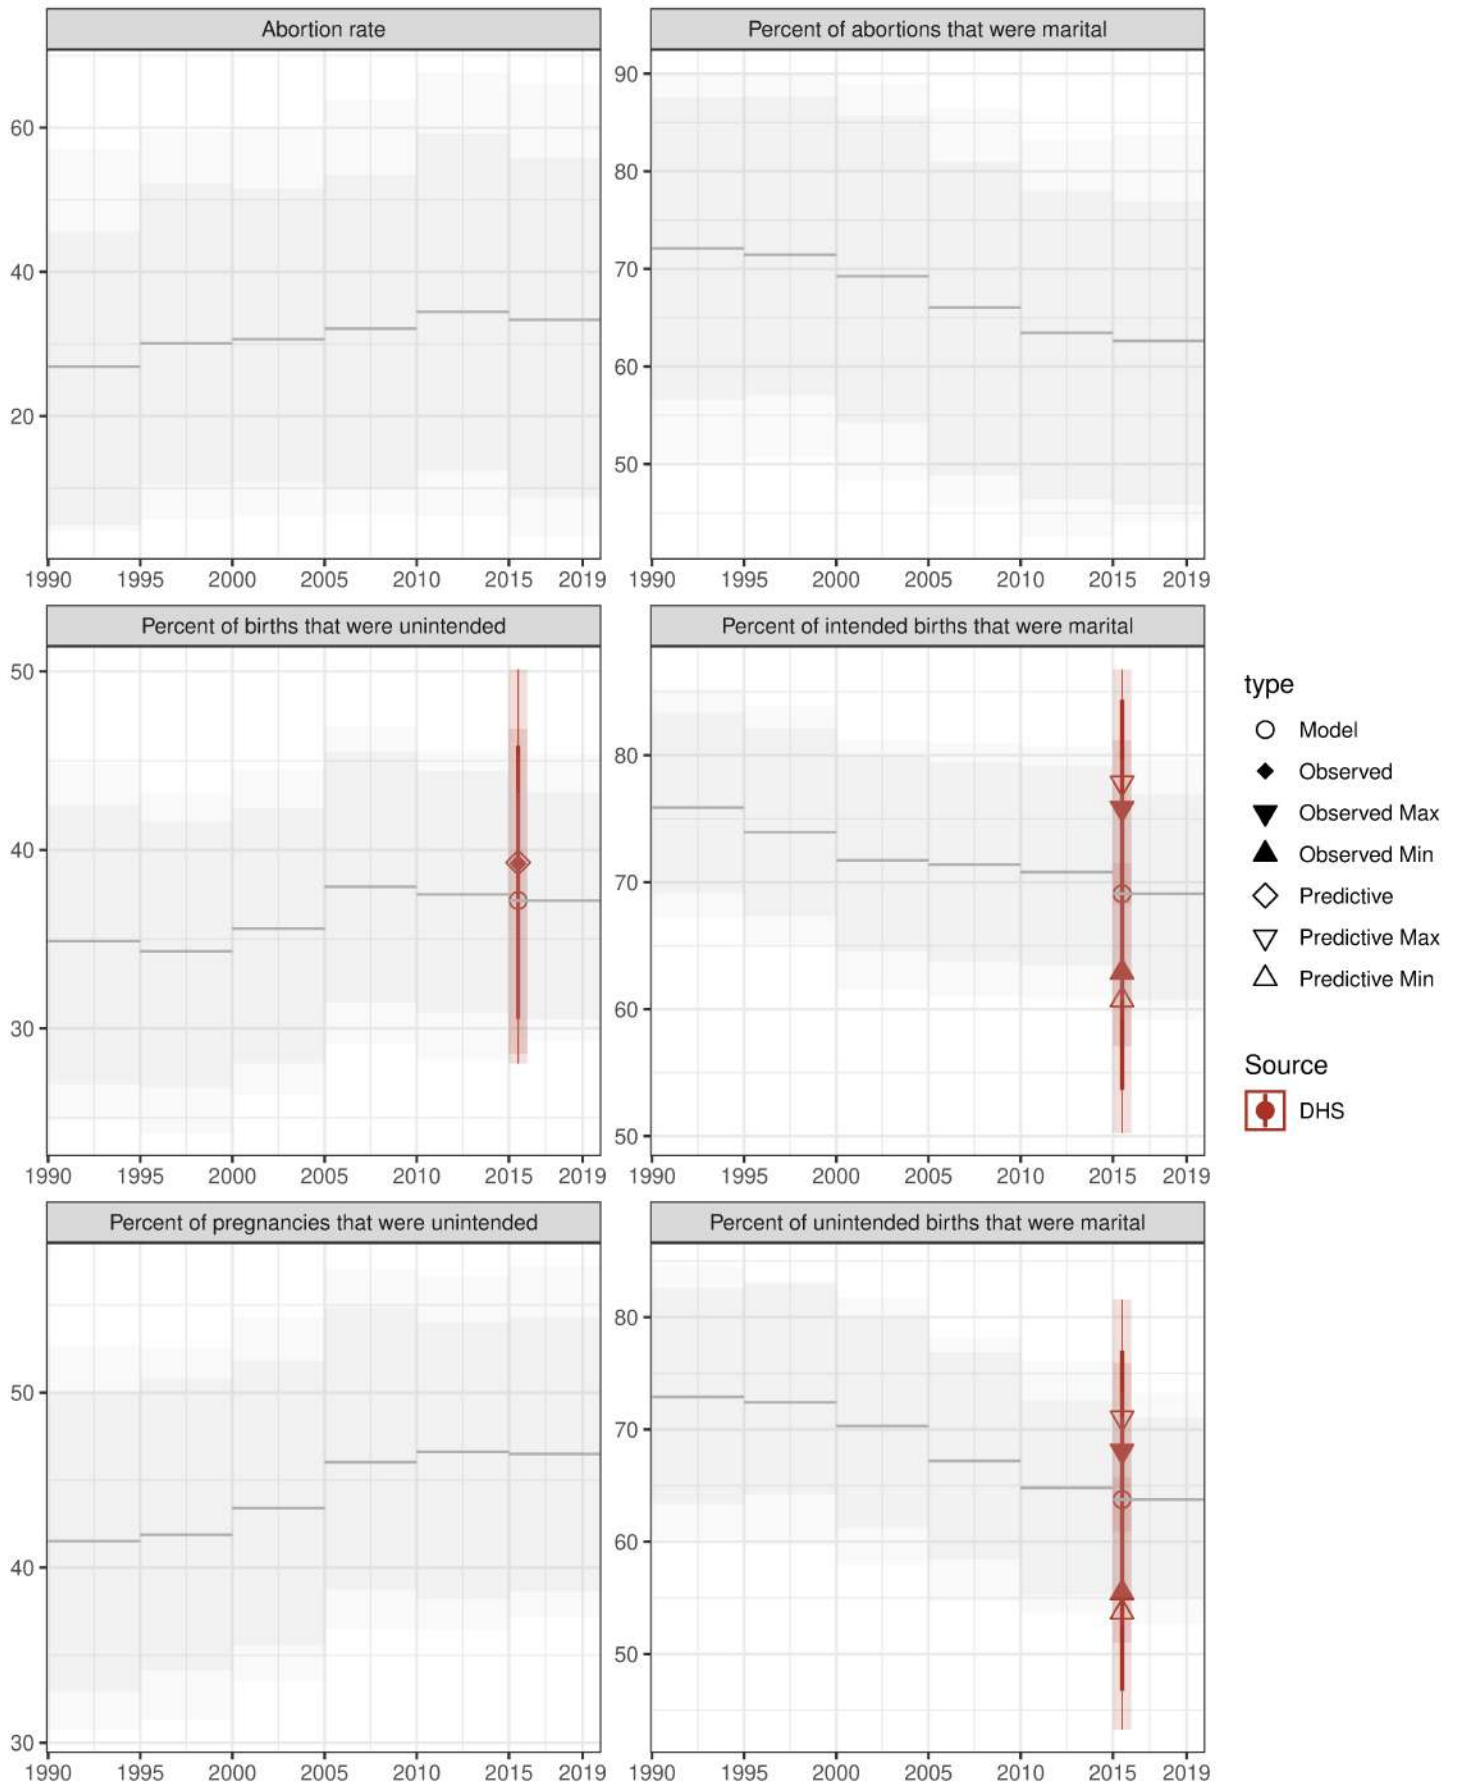

Note: Vertical lines and grey shading show 80% and 95% uncertainty intervals. Color shading shows when data were collected, if more than one year.

### Cameroon

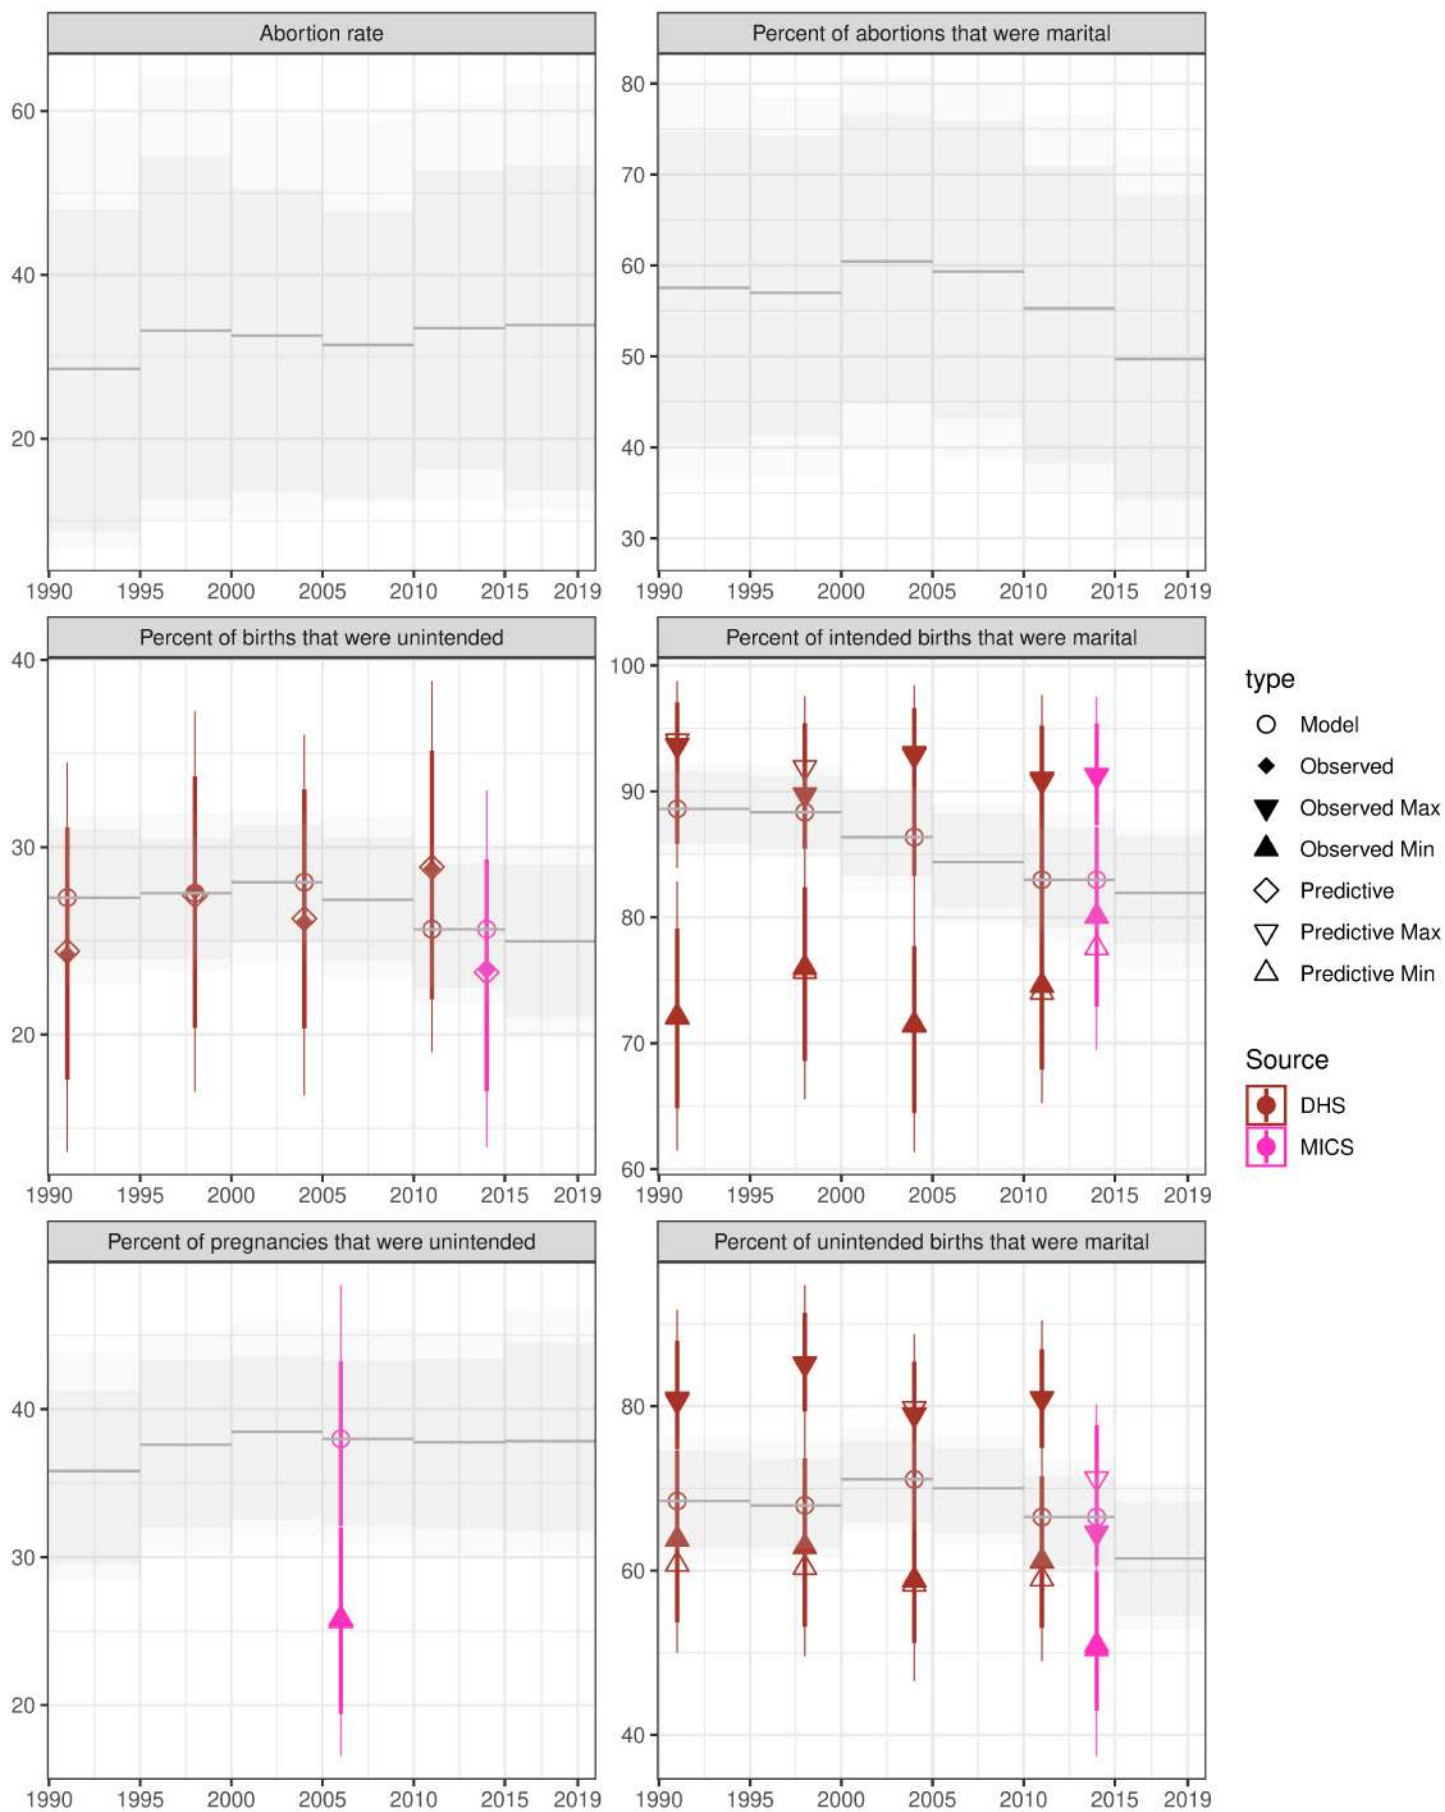

Note: Vertical lines and grey shading show 80% and 95% uncertainty intervals.

### Central African Republic

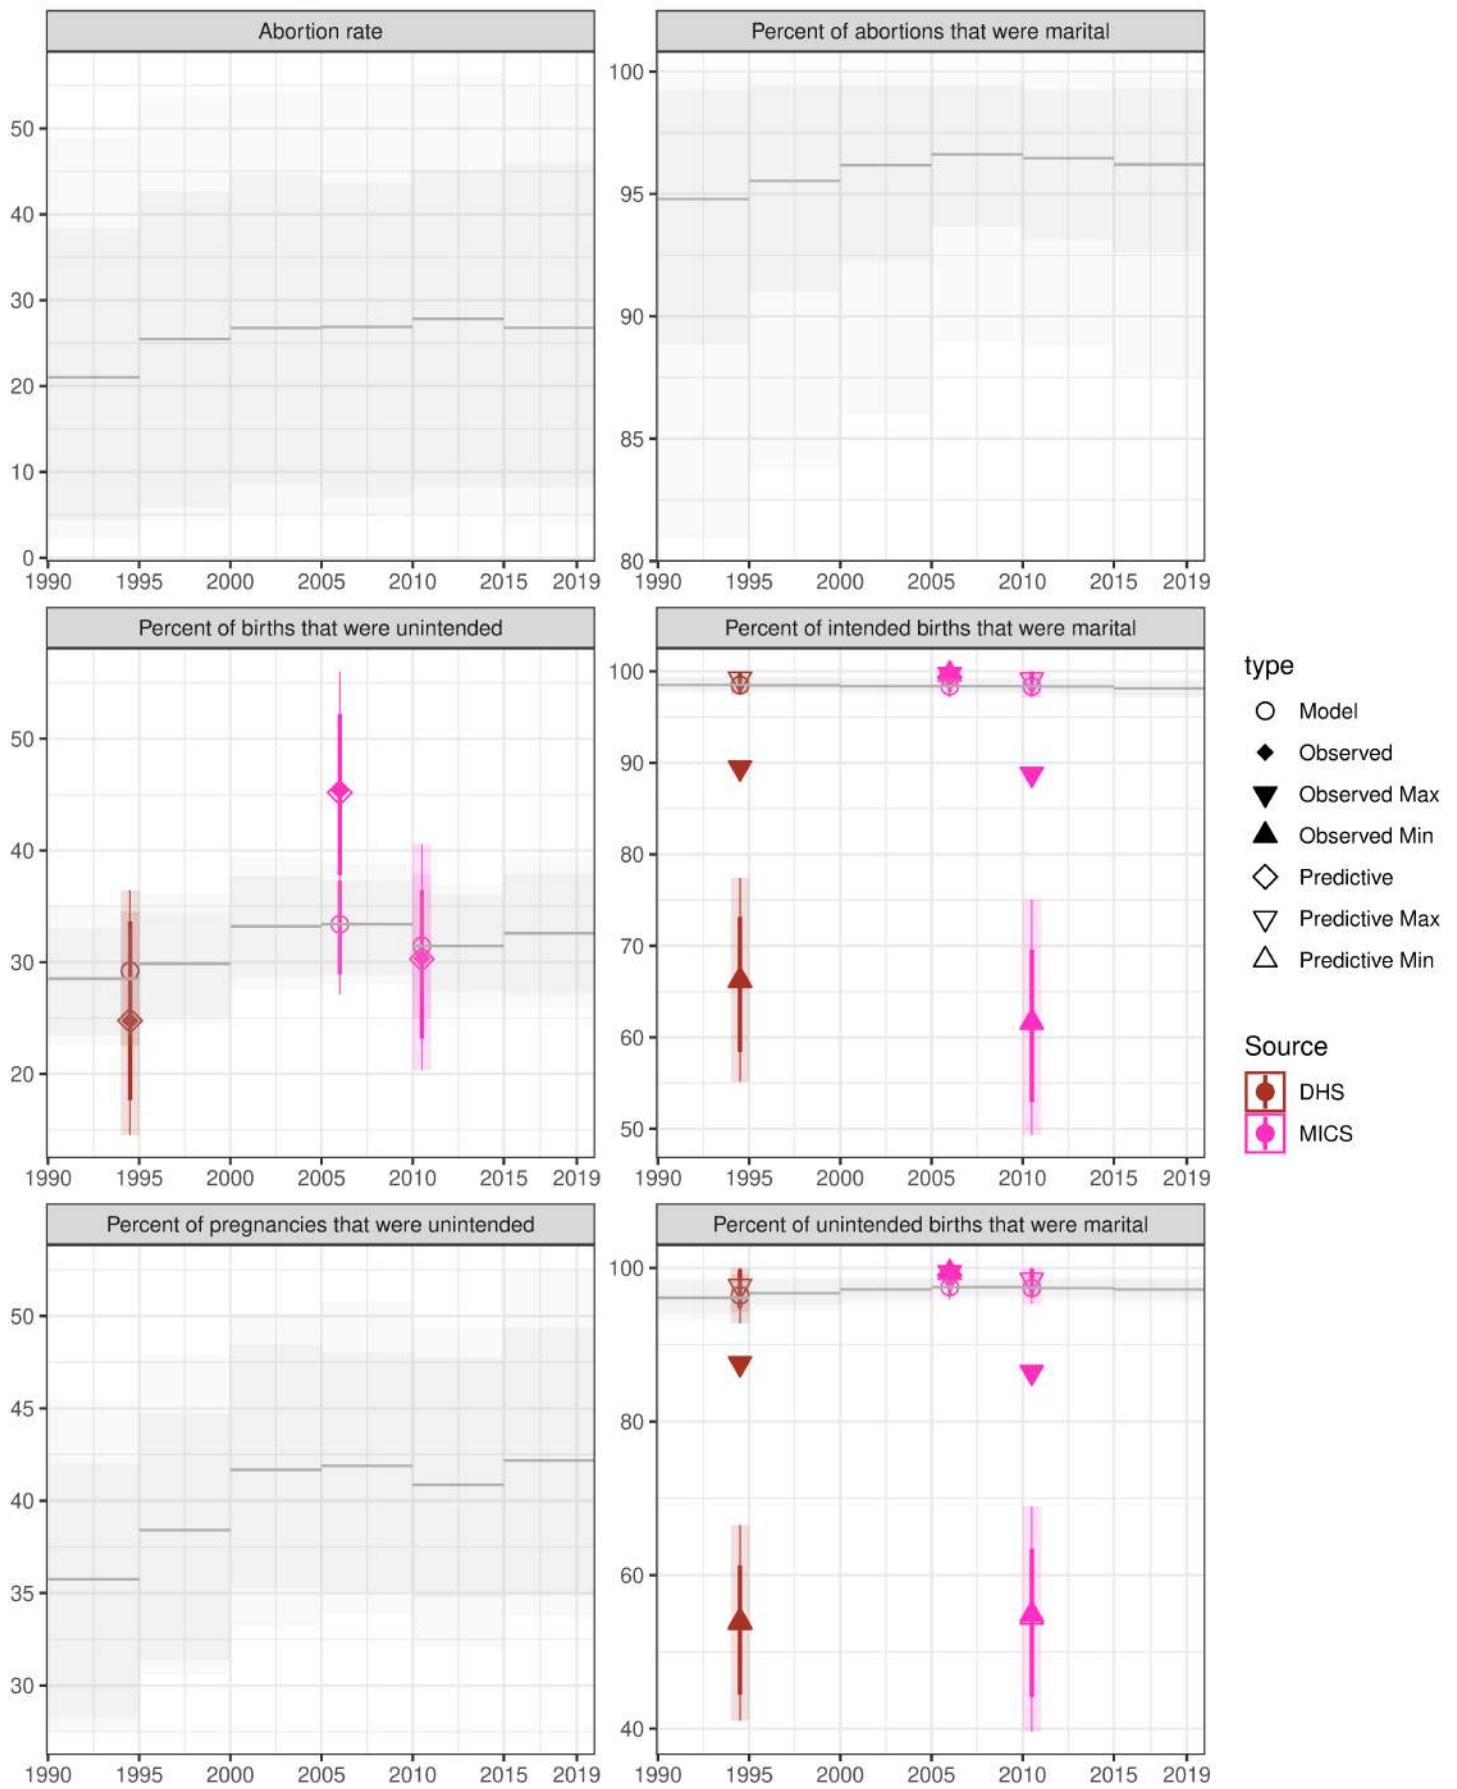

Note: Vertical lines and grey shading show 80% and 95% uncertainty intervals. Color shading shows when data were collected, if more than one year.

Chad

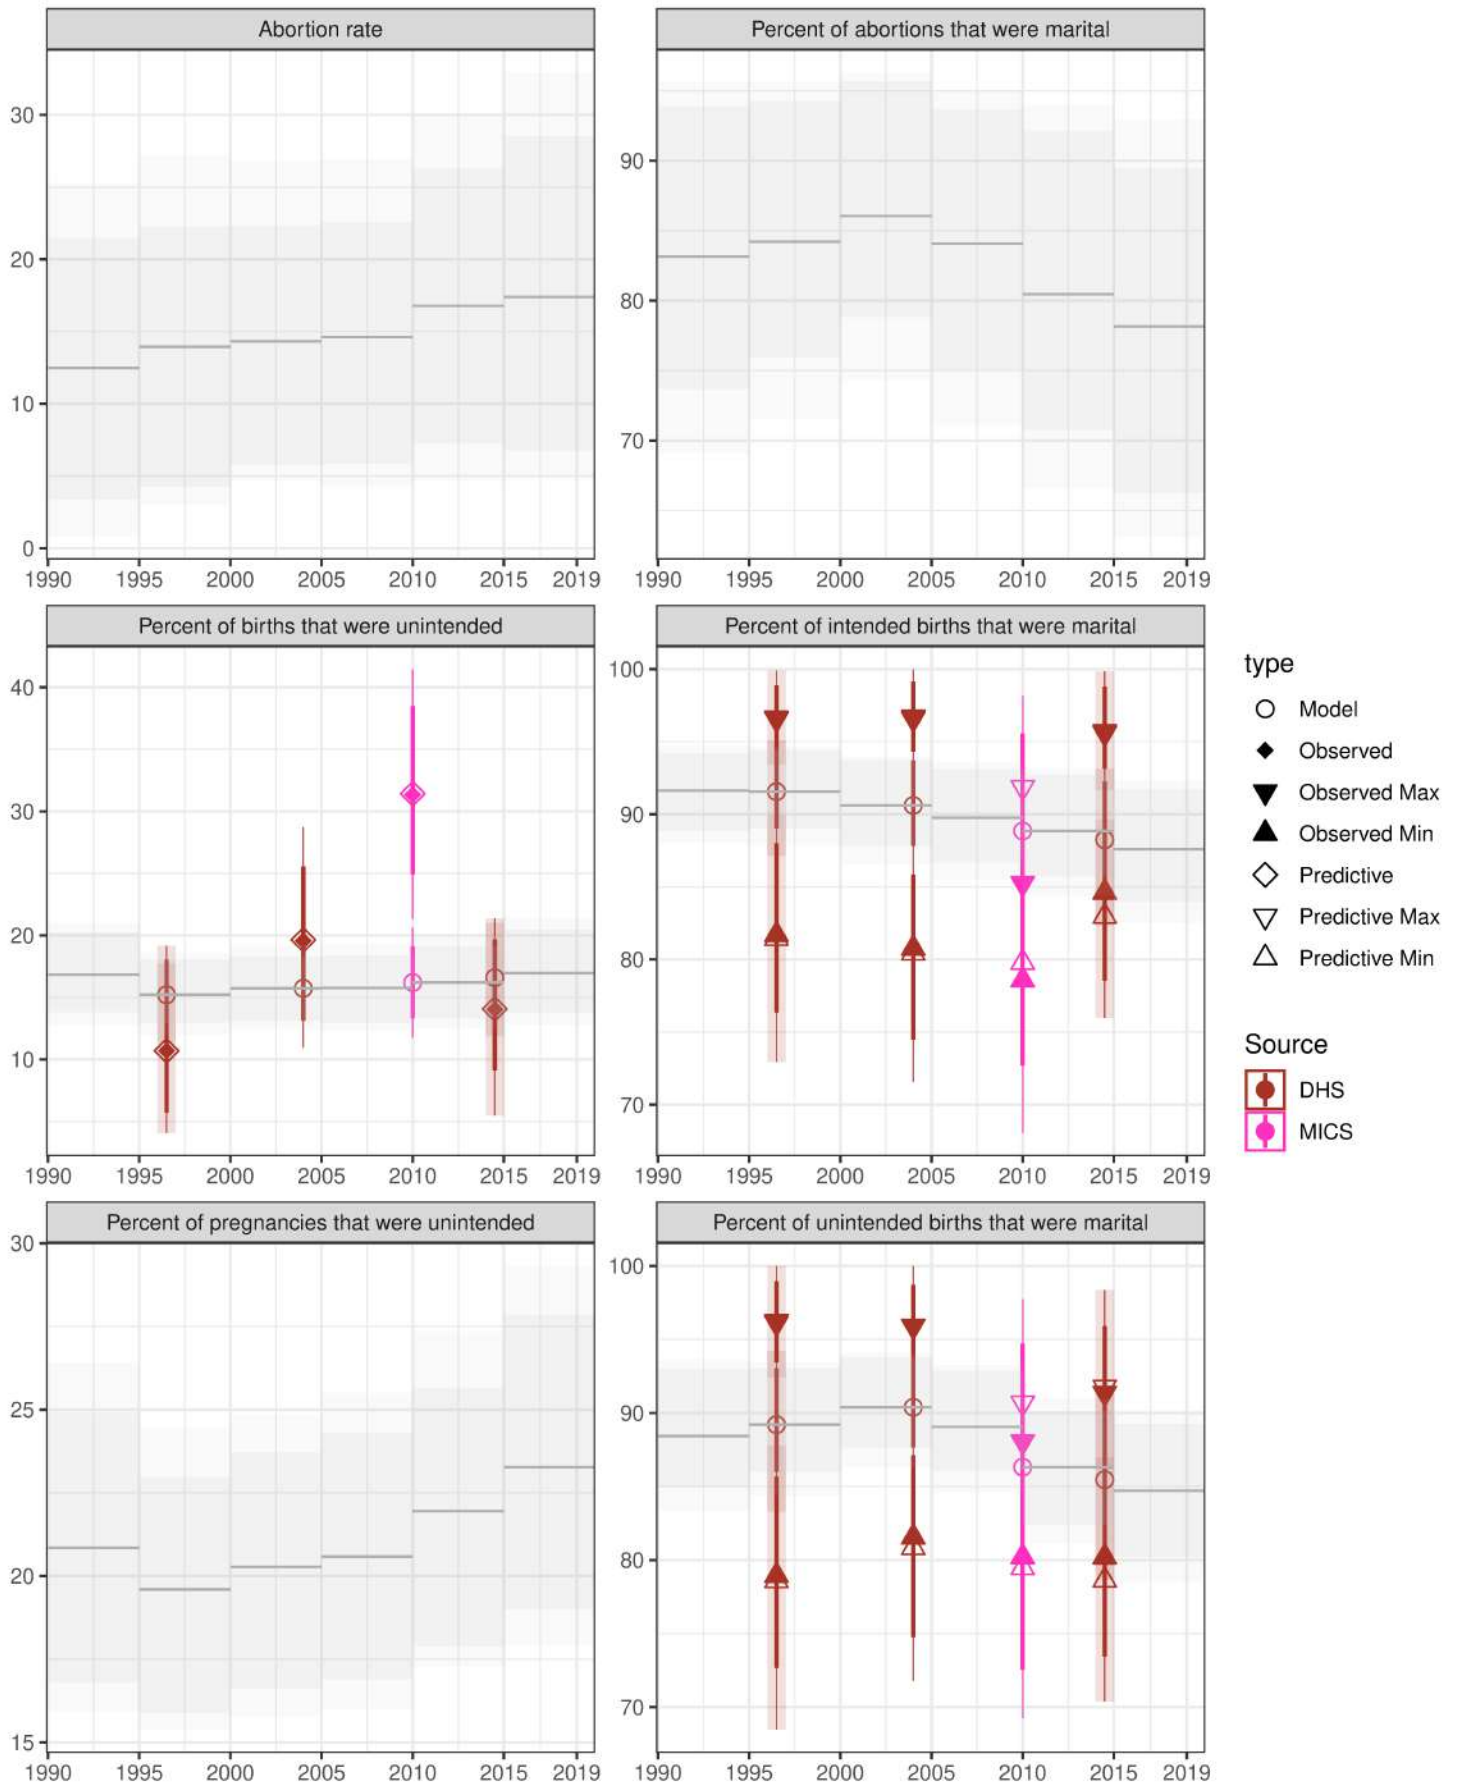

Note: Vertical lines and grey shading show 80% and 95% uncertainty intervals. Color shading shows when data were collected, if more than one year.

### Congo

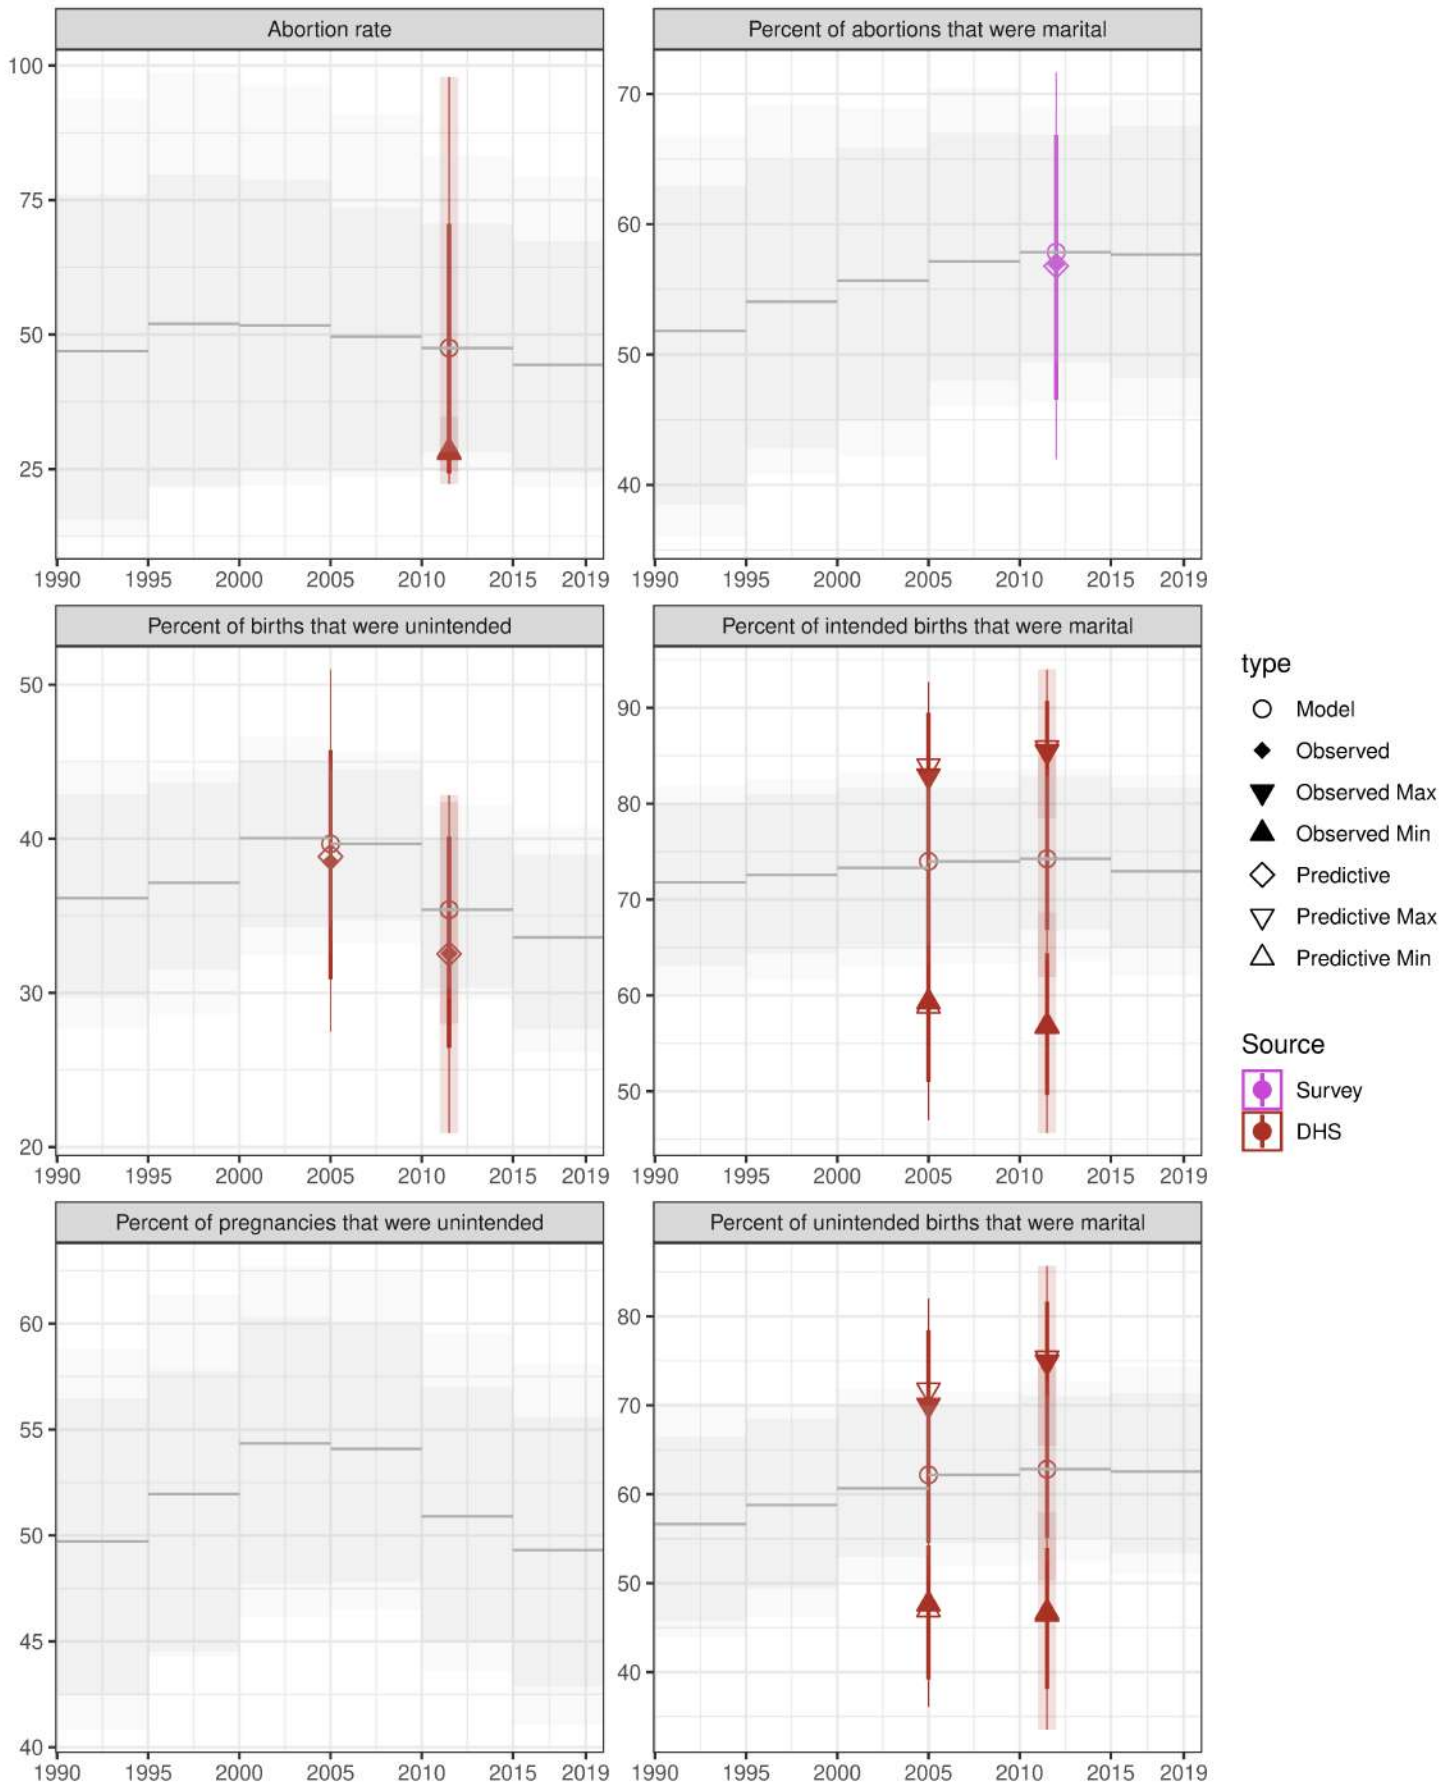

Note: Vertical lines and grey shading show 80% and 95% uncertainty intervals. Color shading shows when data were collected, if more than one year.

### DR Congo

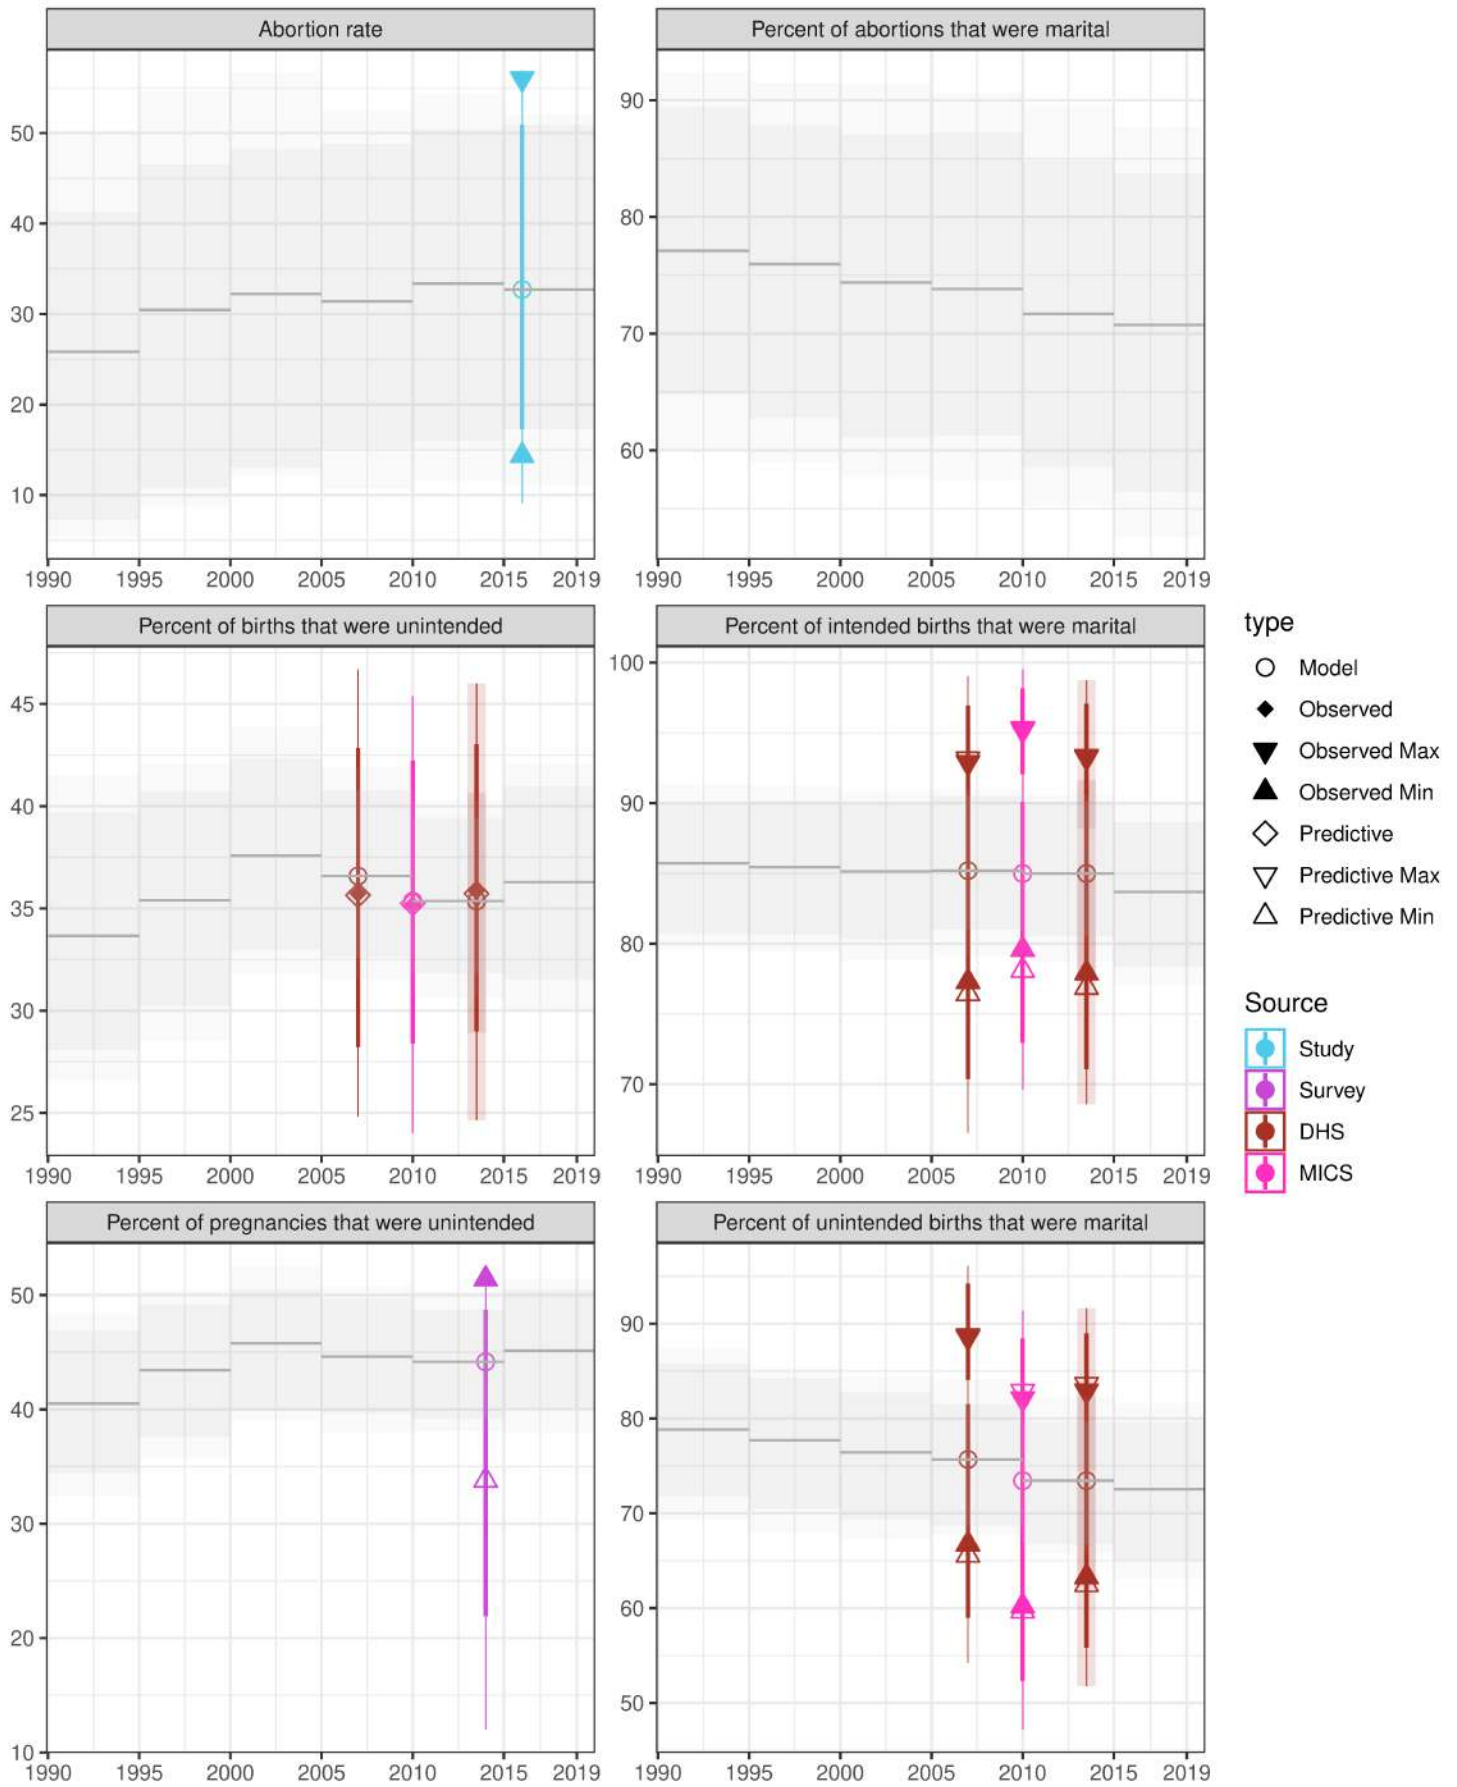

Note: Vertical lines and grey shading show 80% and 95% uncertainty intervals. Color shading shows when data were collected, if more than one year.

### Gabon

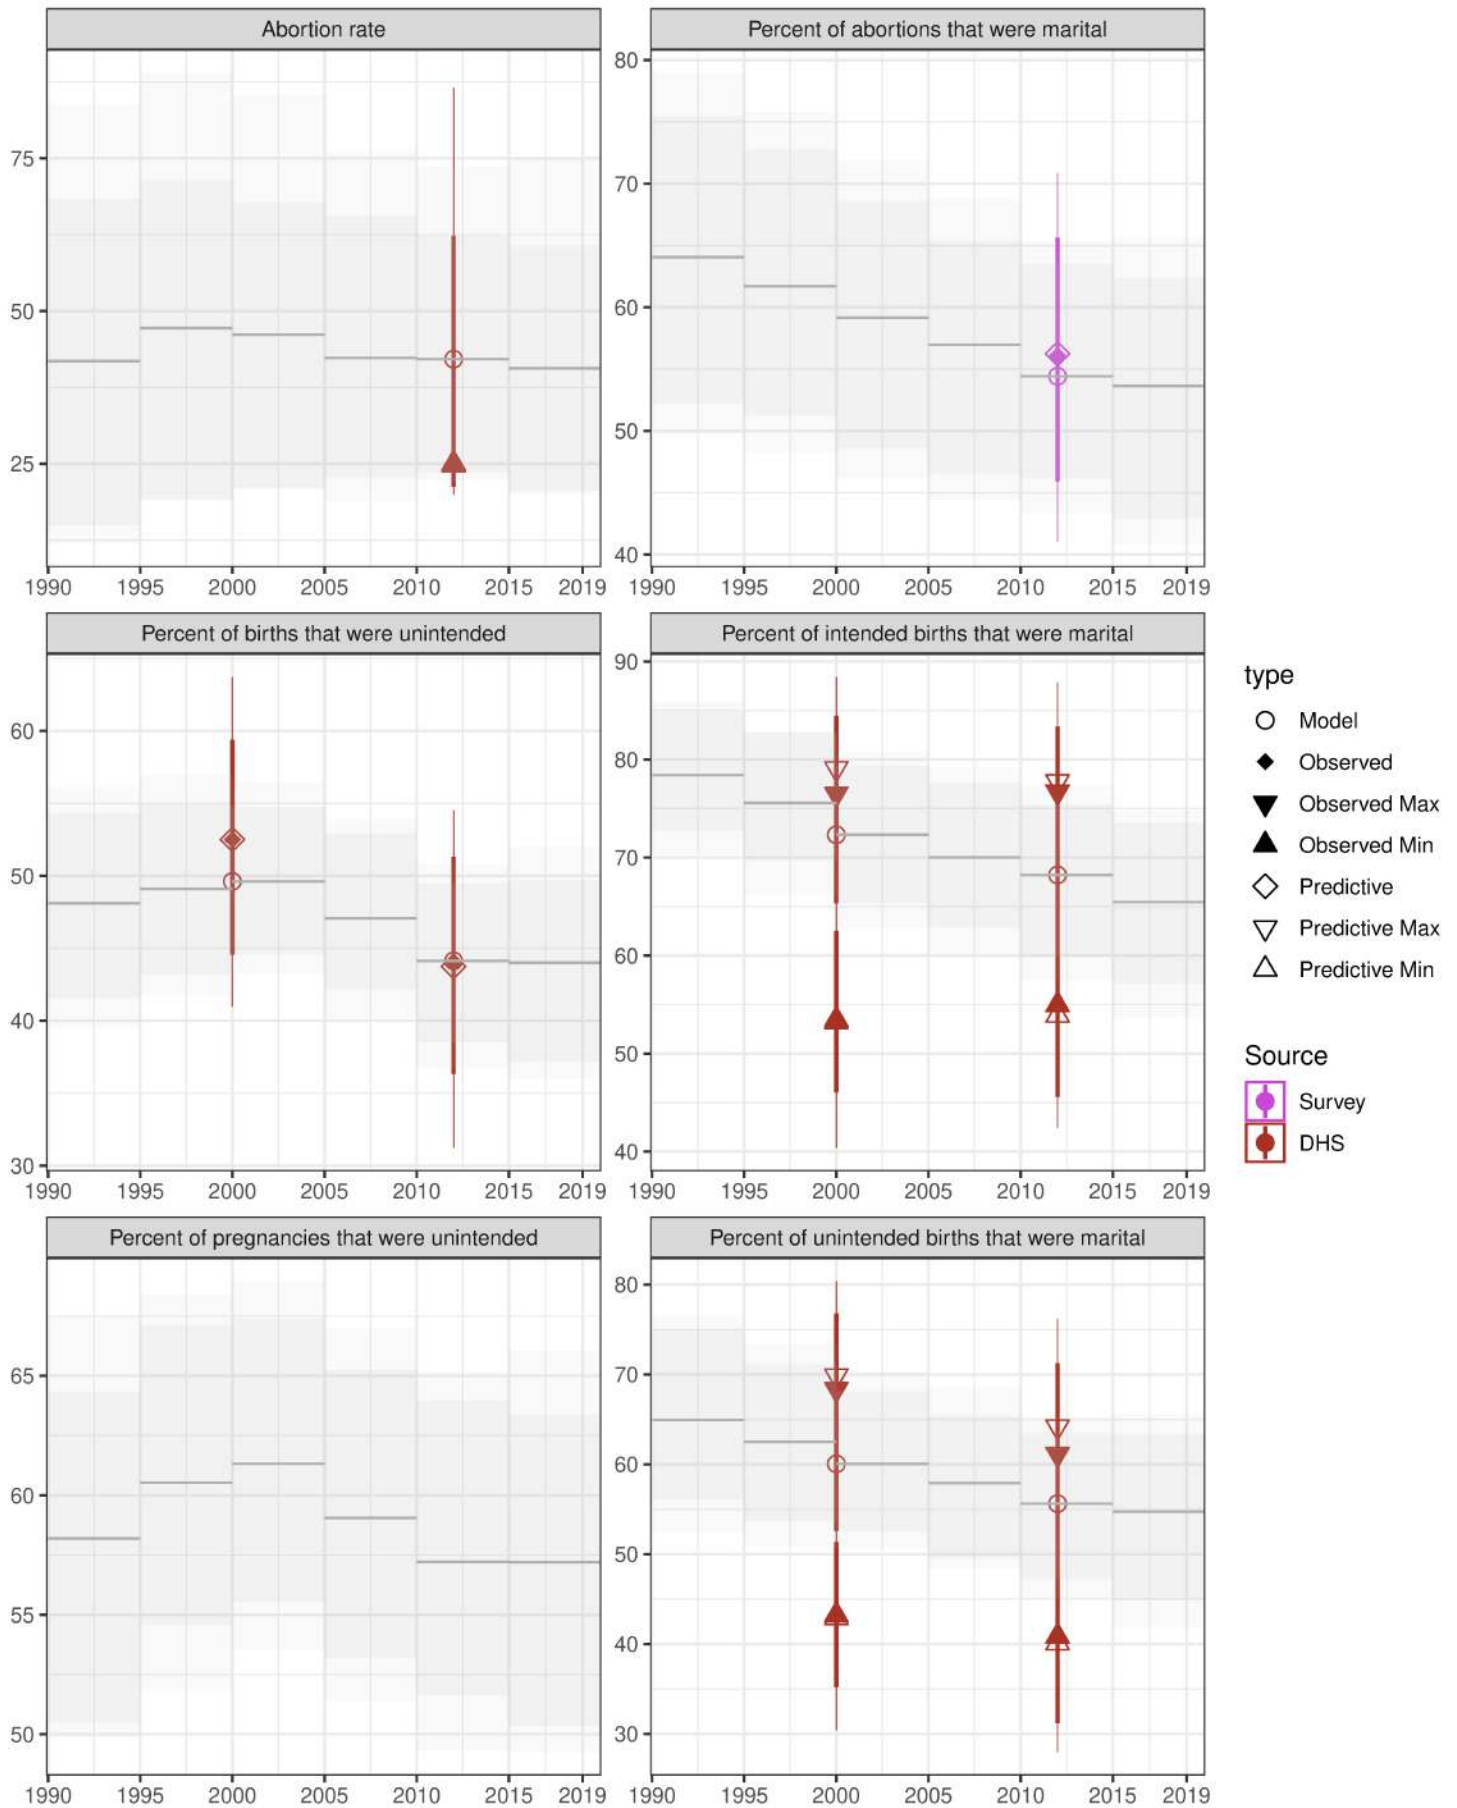

Note: Vertical lines and grey shading show 80% and 95% uncertainty intervals.



### Sao Tome and Principe

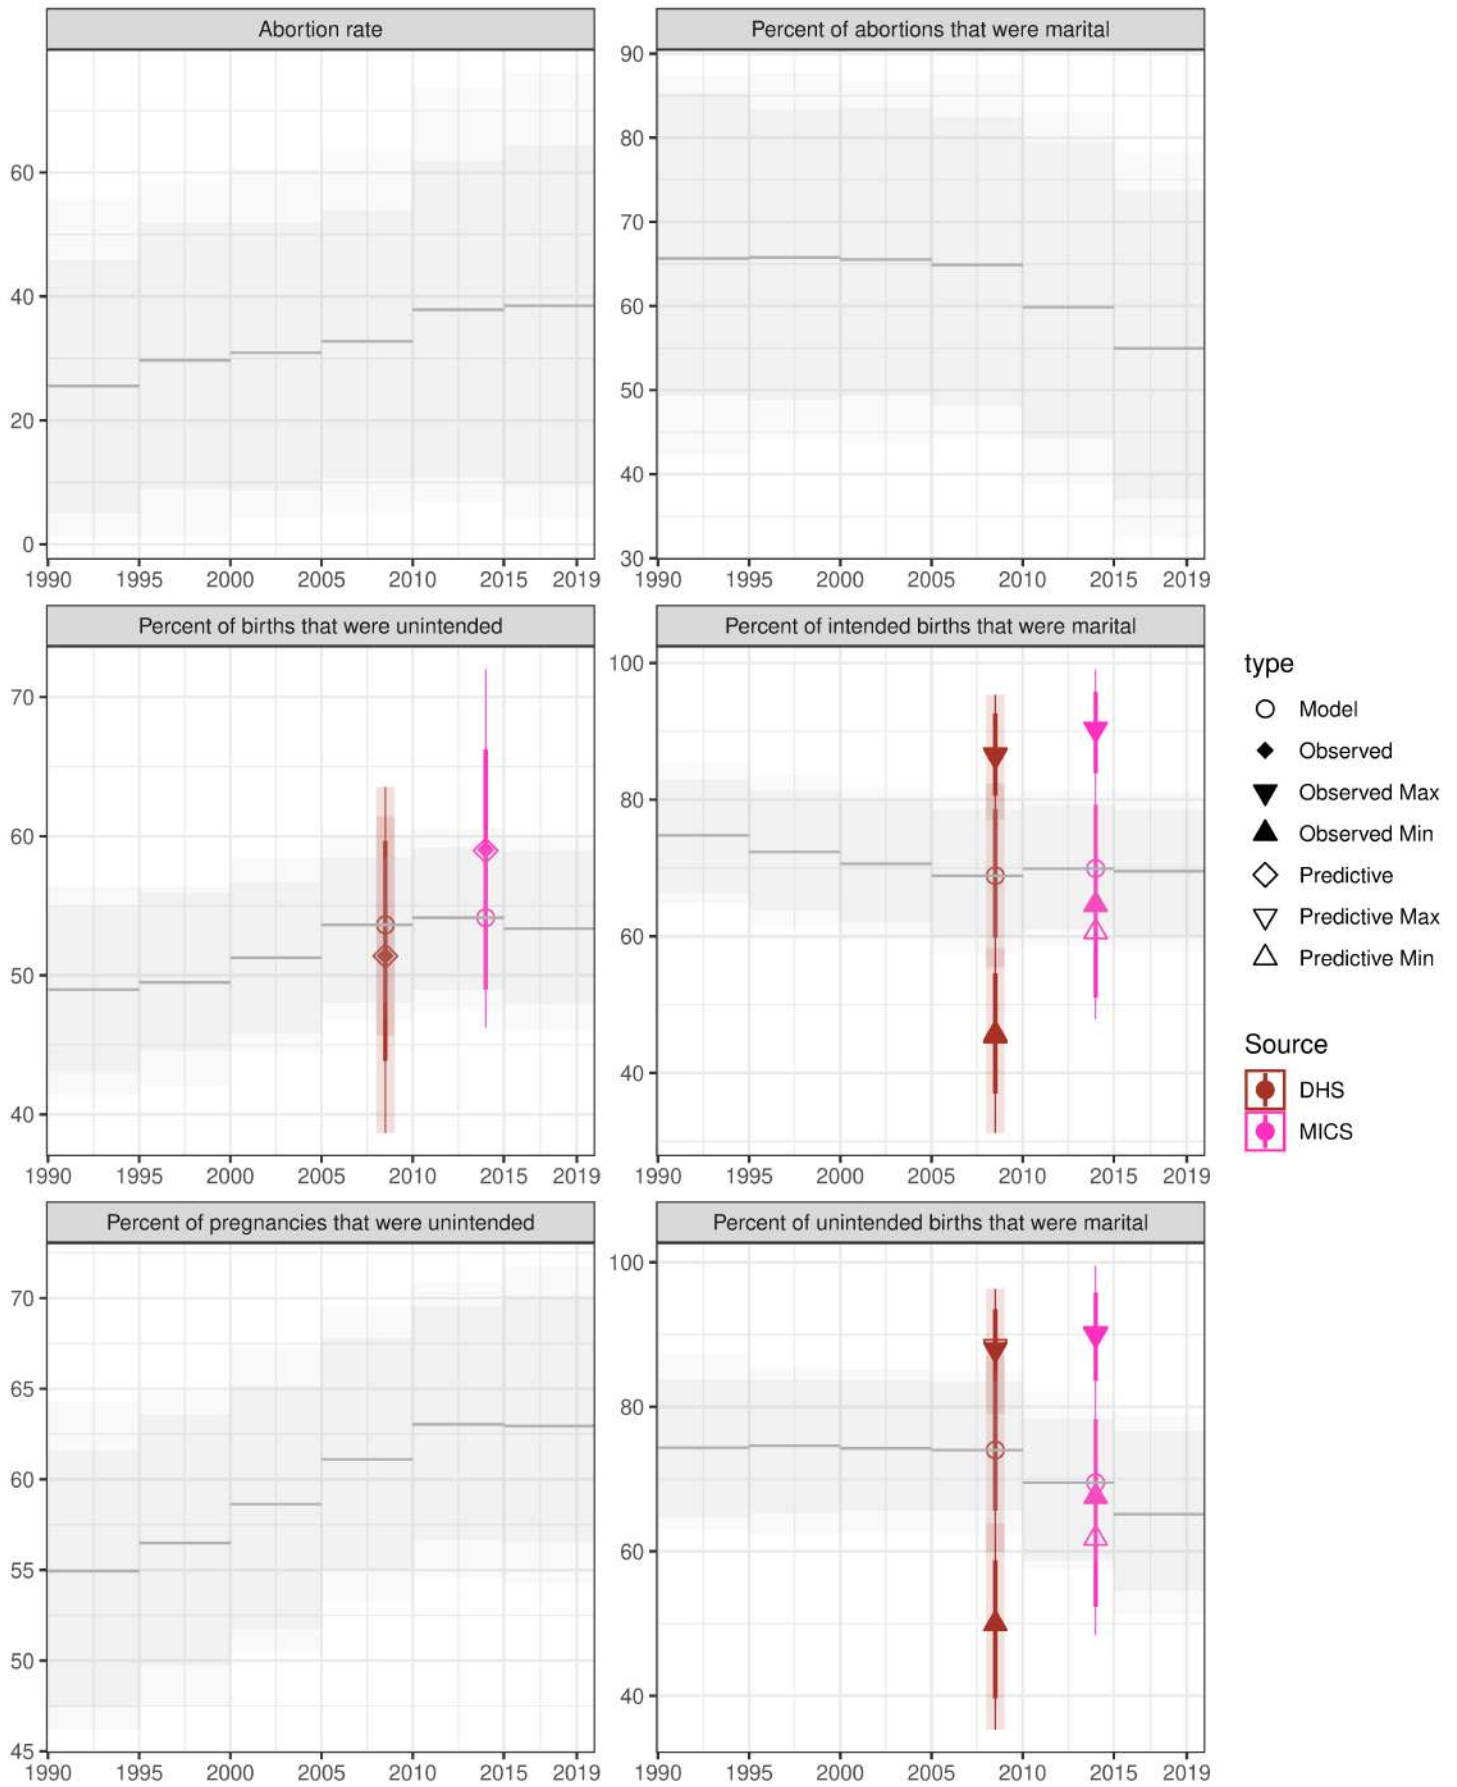

Note: Vertical lines and grey shading show 80% and 95% uncertainty intervals. Color shading shows when data were collected, if more than one year.

## 1.4 Southern Africa

### Botswana

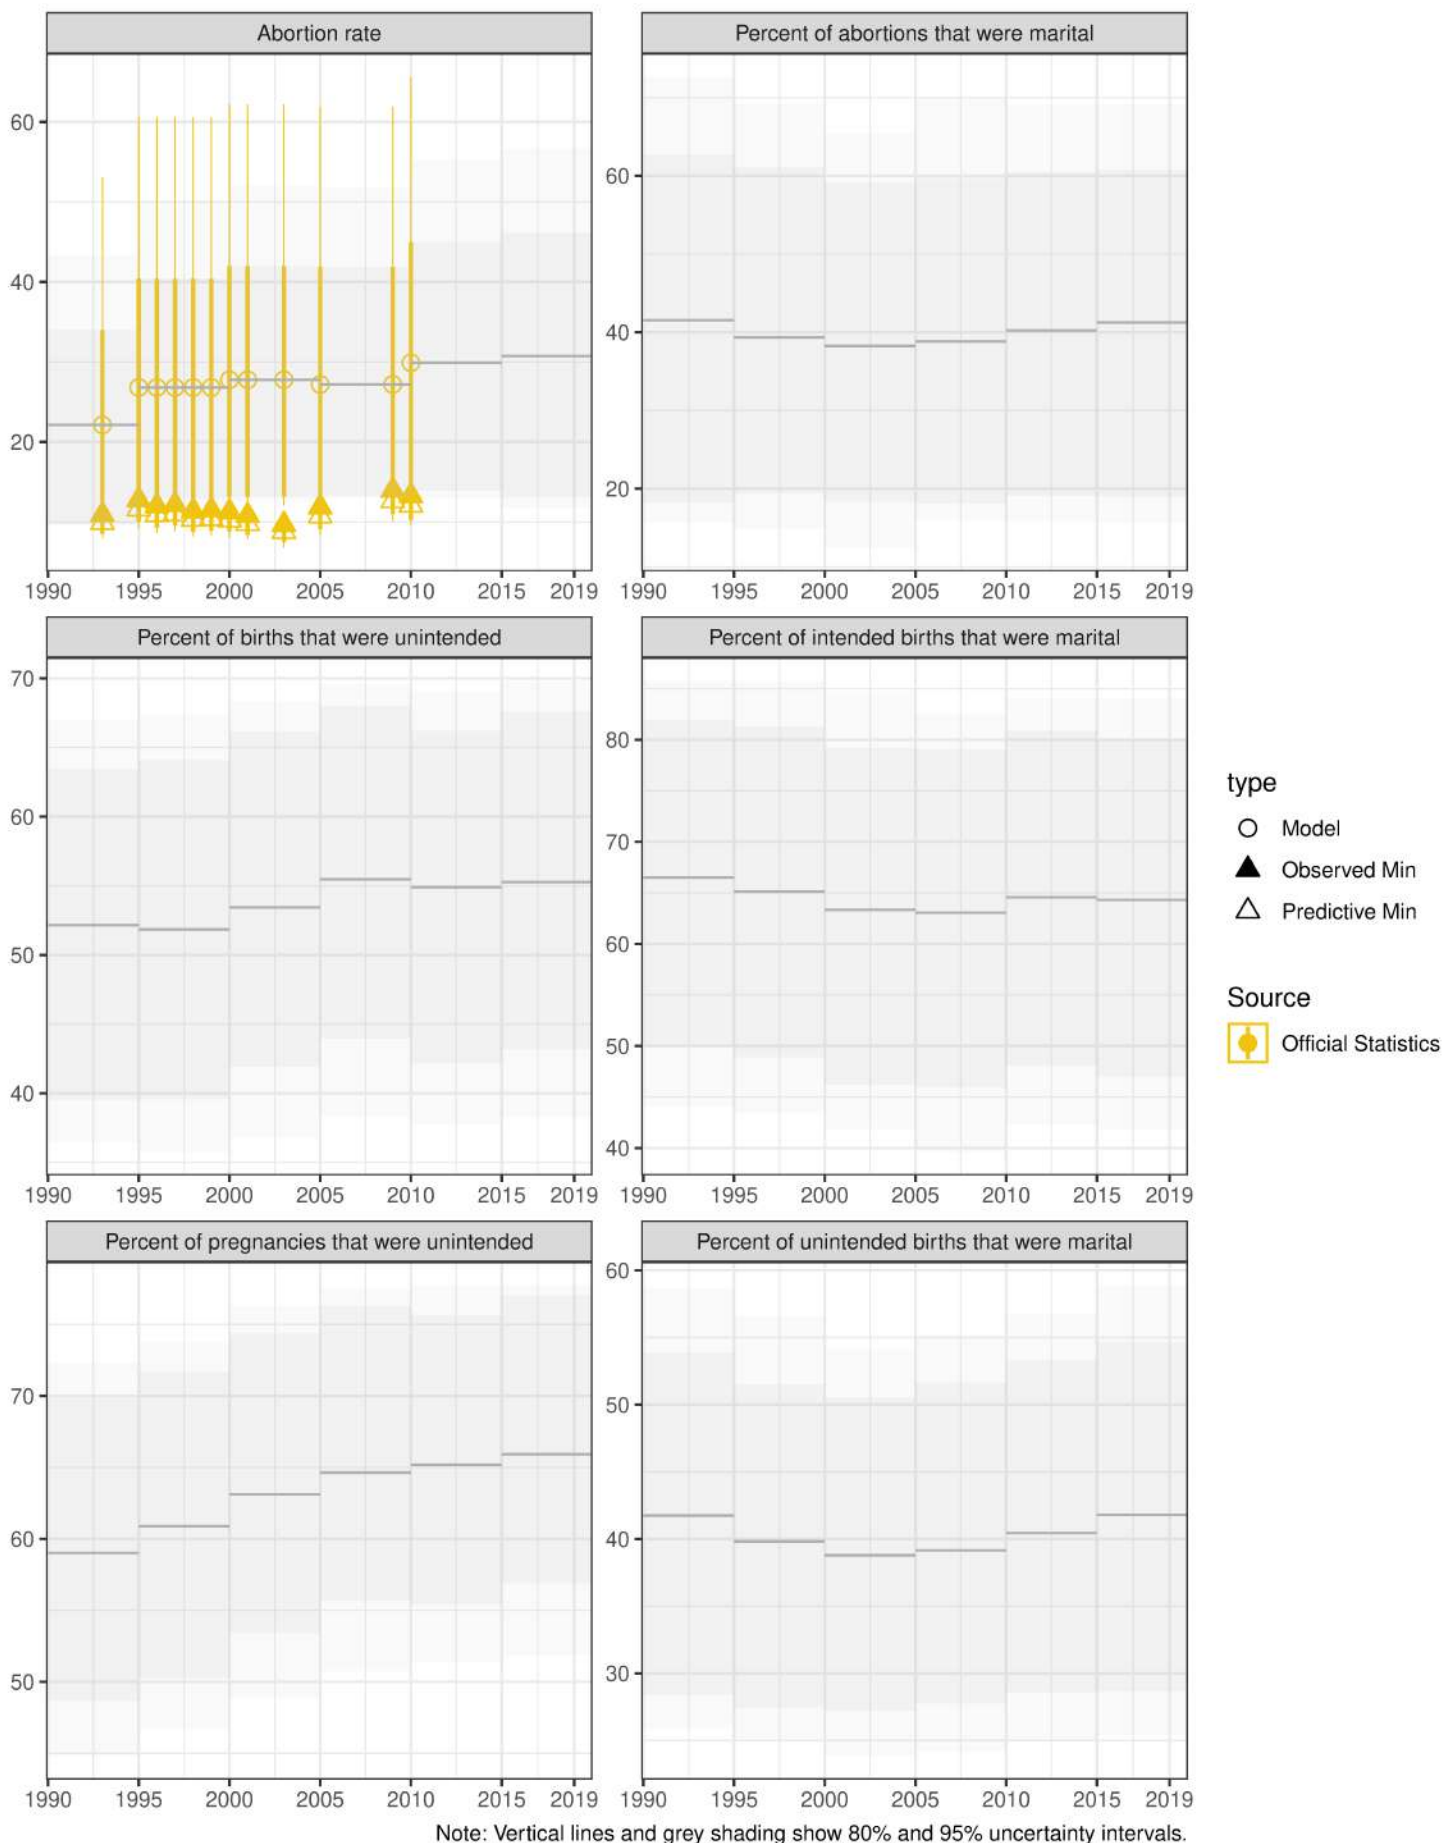

### Eswatini

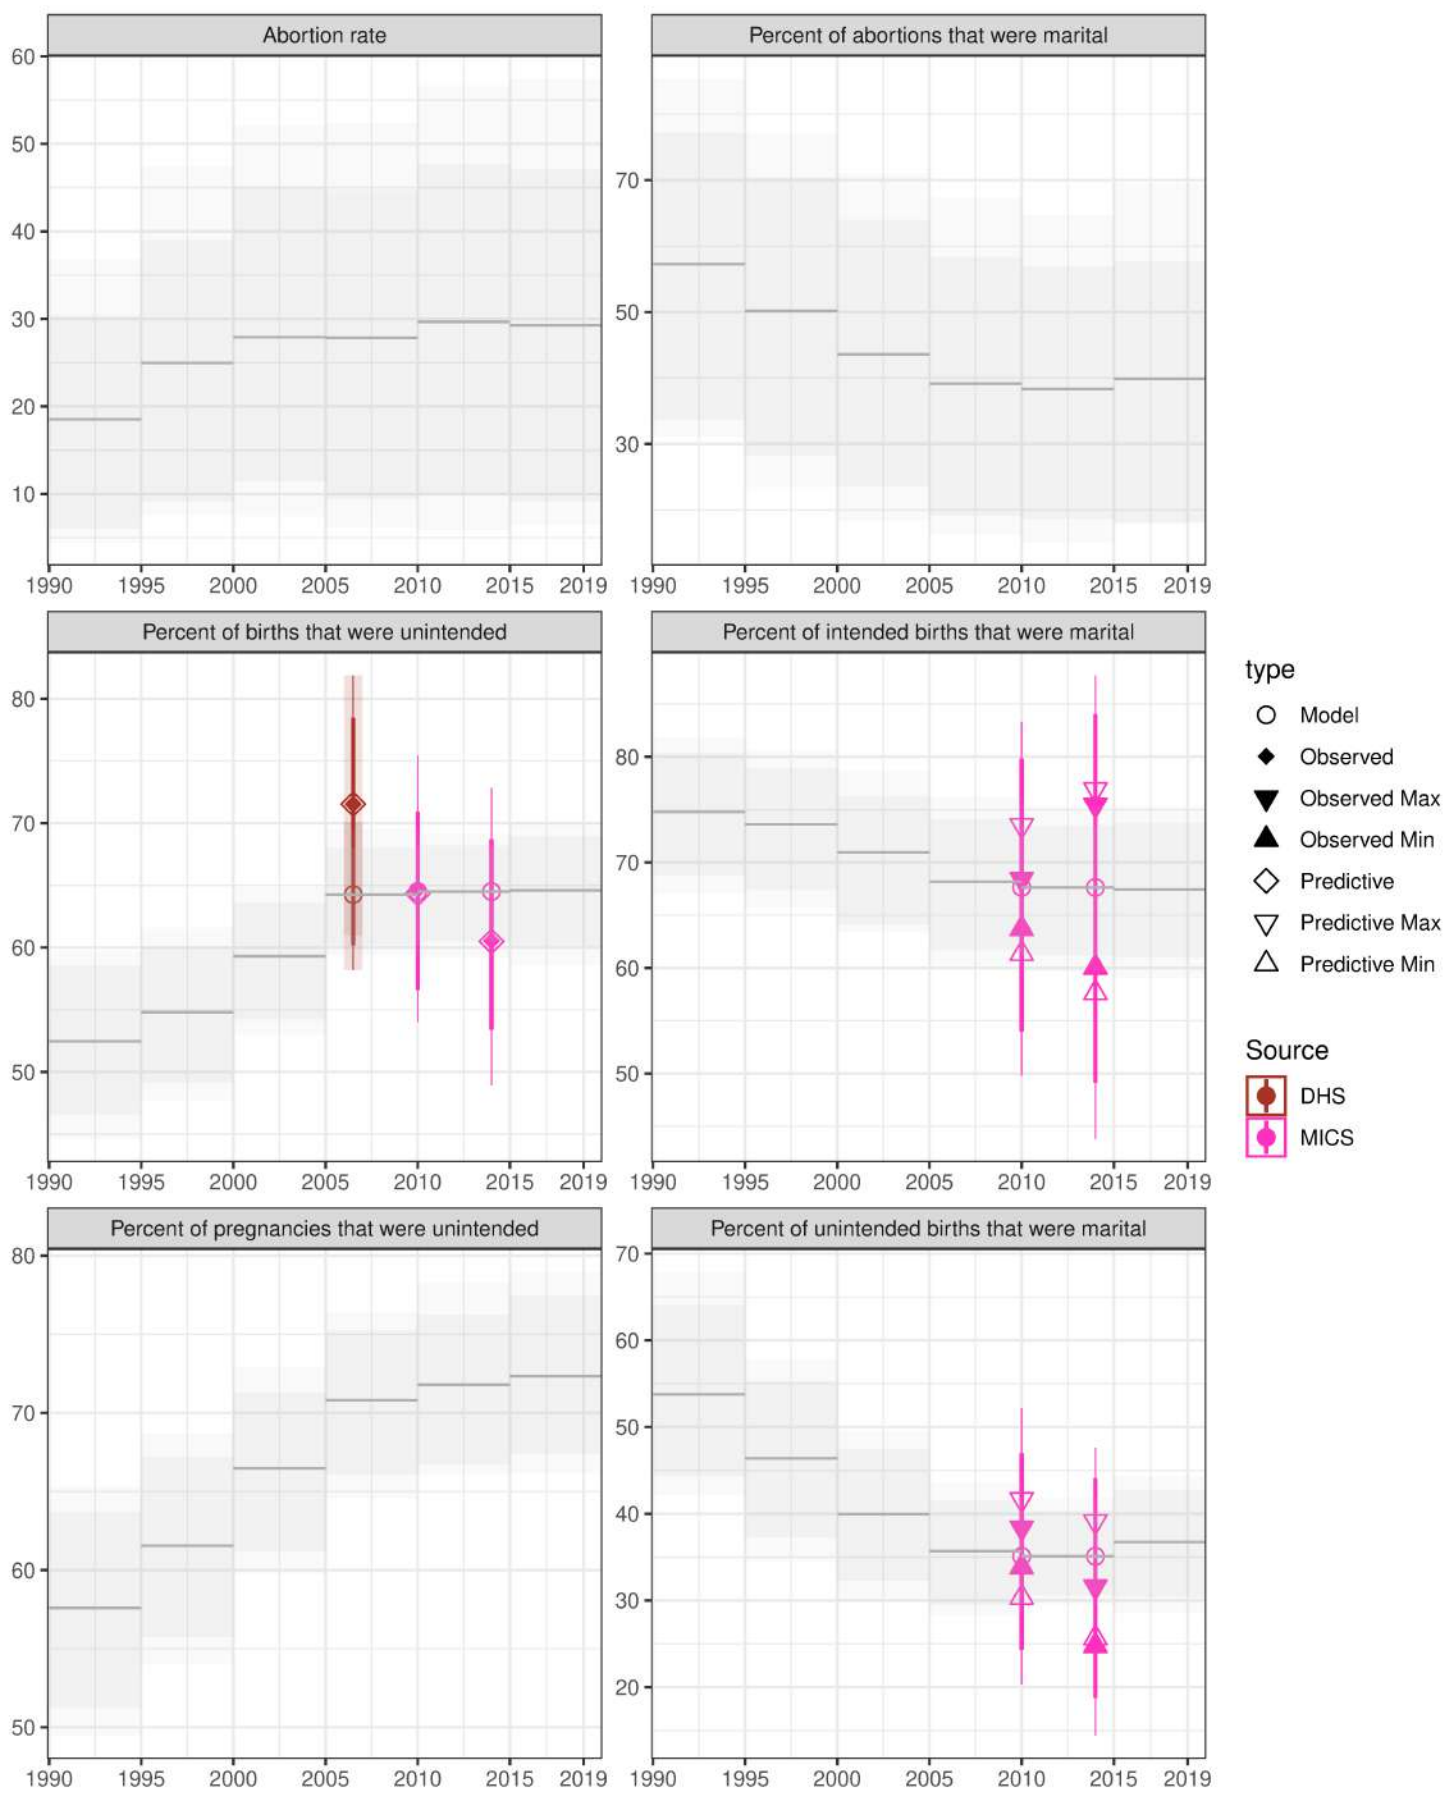

Note: Vertical lines and grey shading show 80% and 95% uncertainty intervals. Color shading shows when data were collected, if more than one year.

### Lesotho

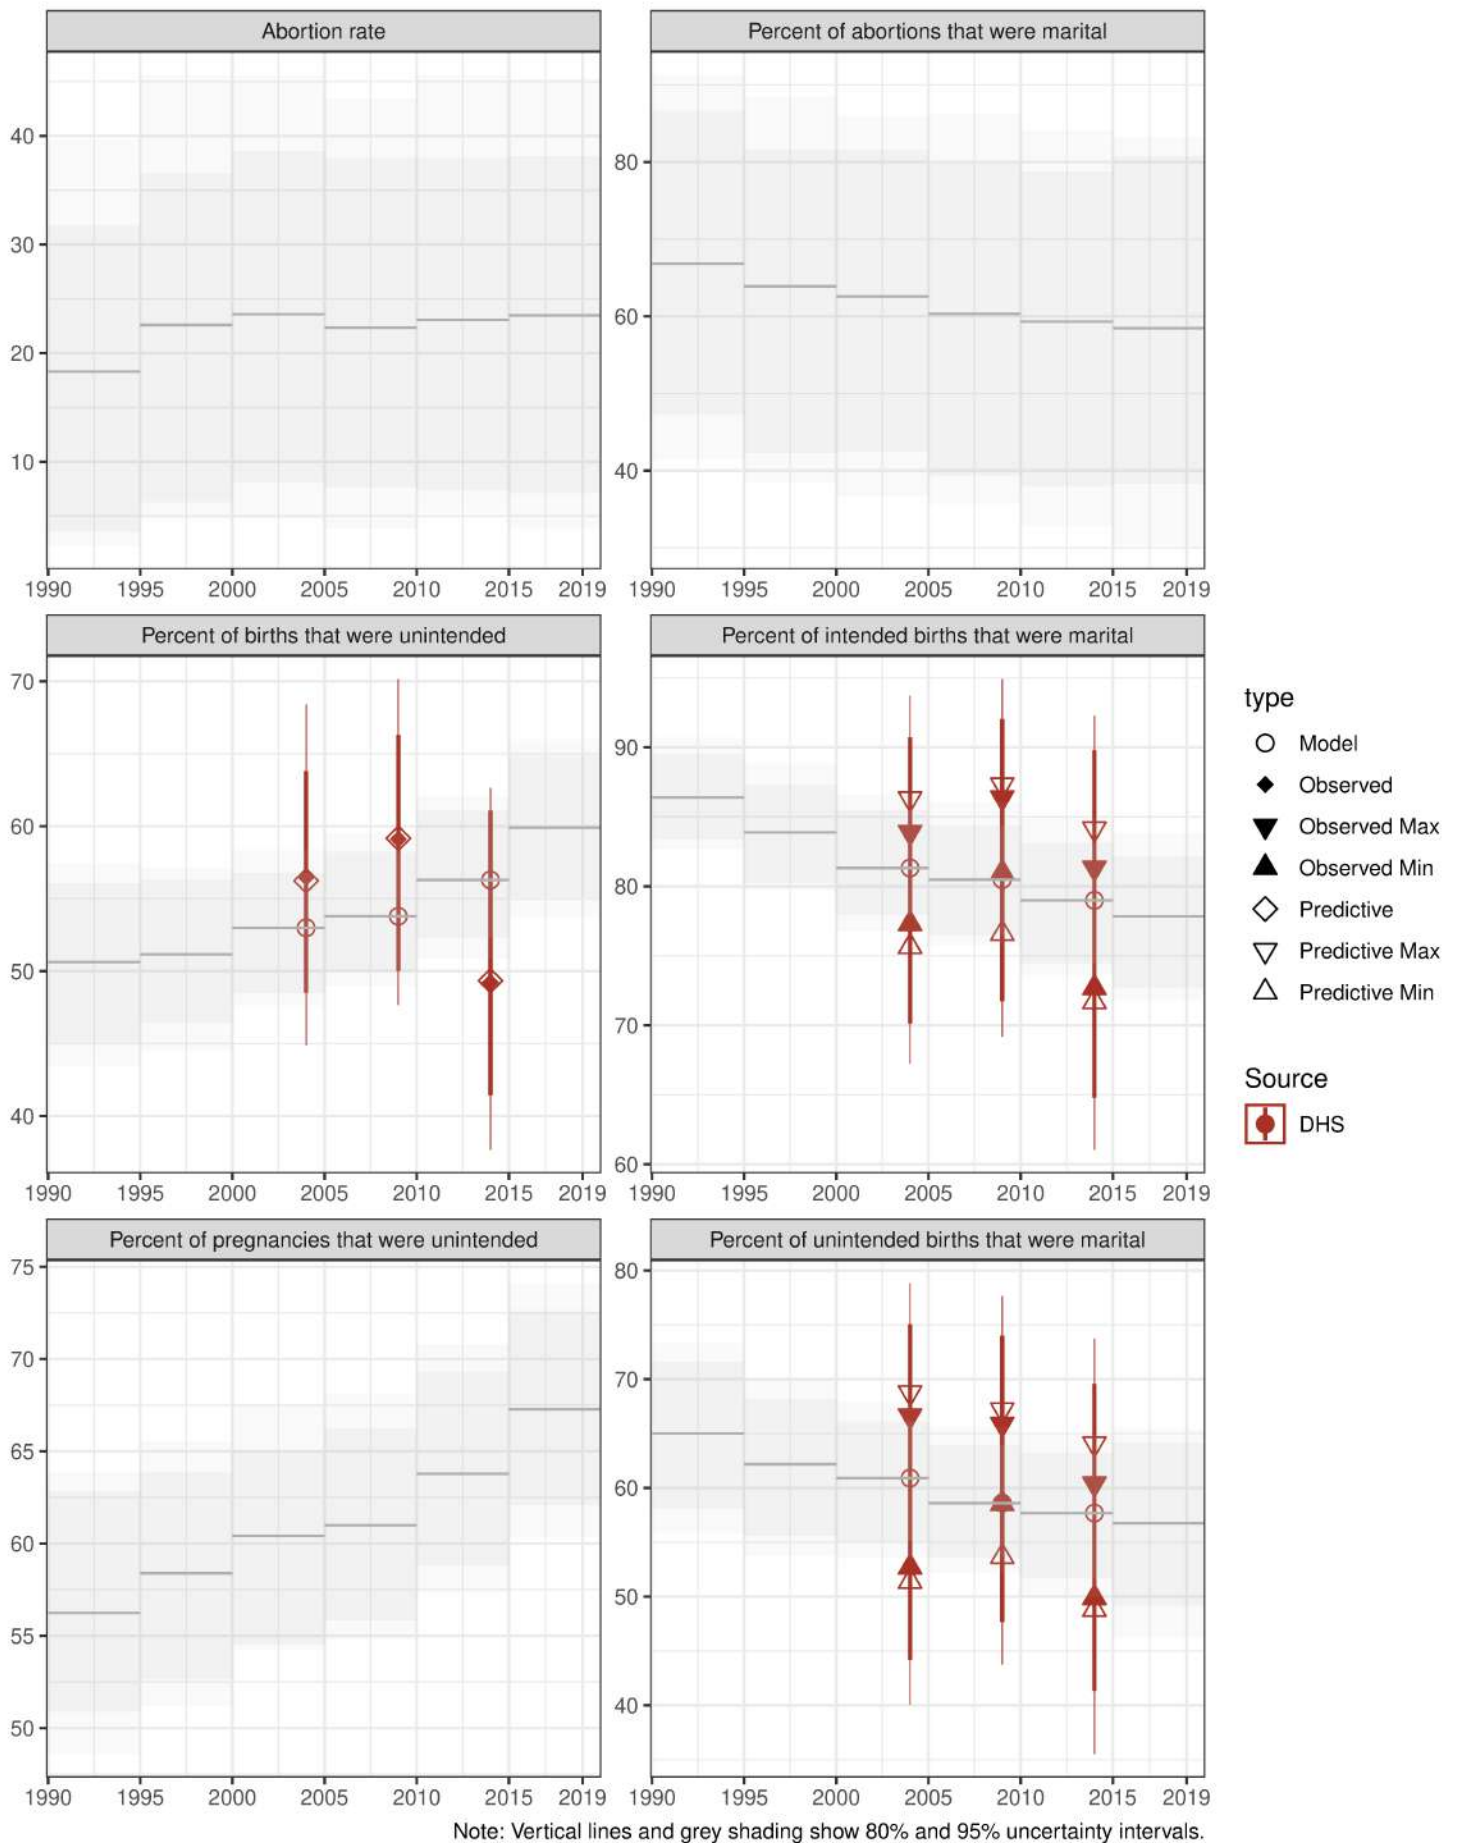

### Namibia

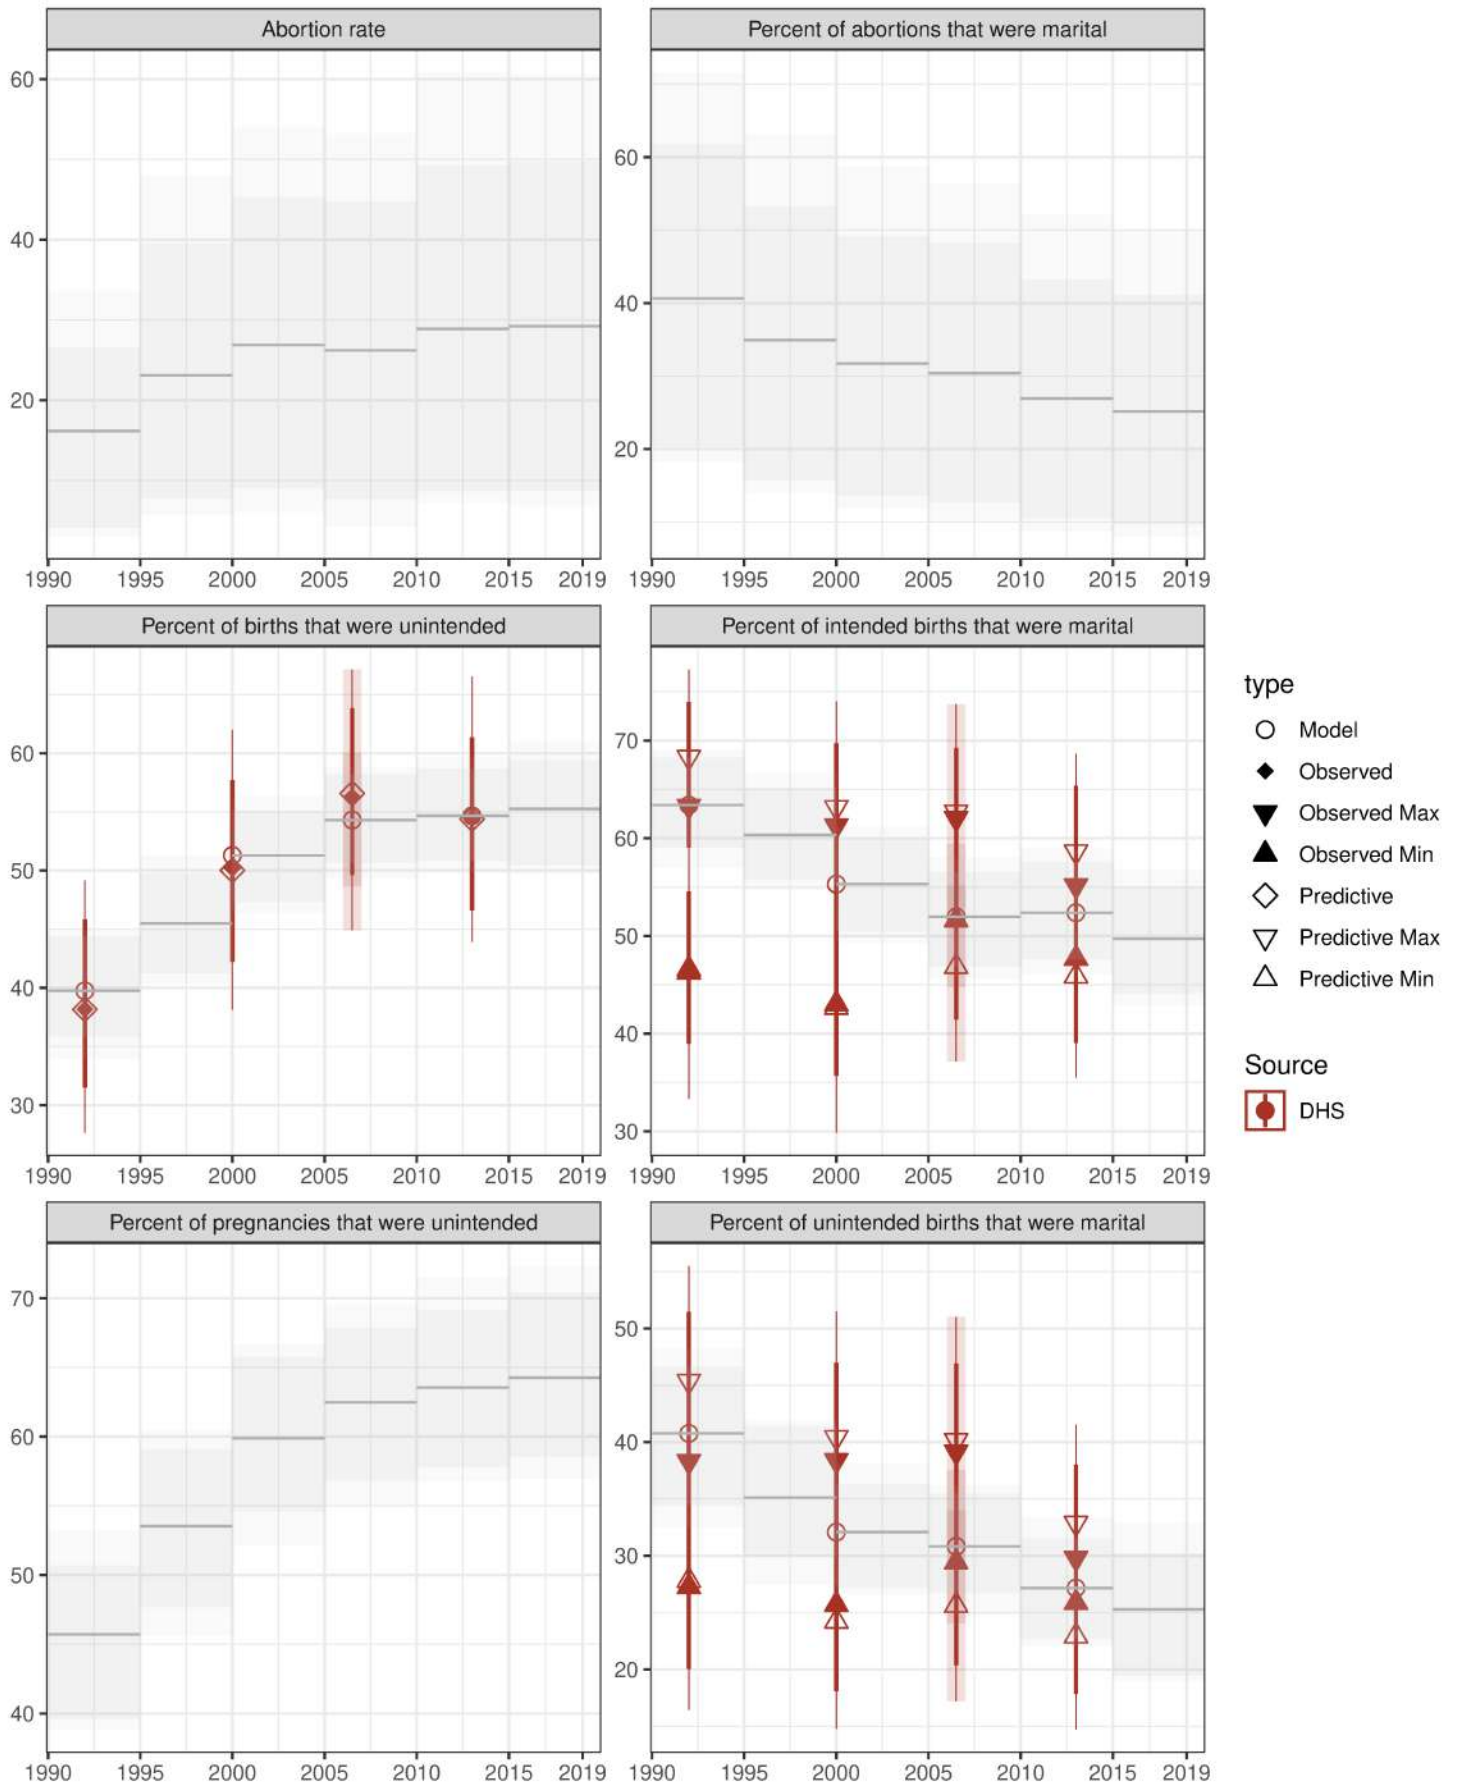

Note: Vertical lines and grey shading show 80% and 95% uncertainty intervals. Color shading shows when data were collected, if more than one year.

### South Africa

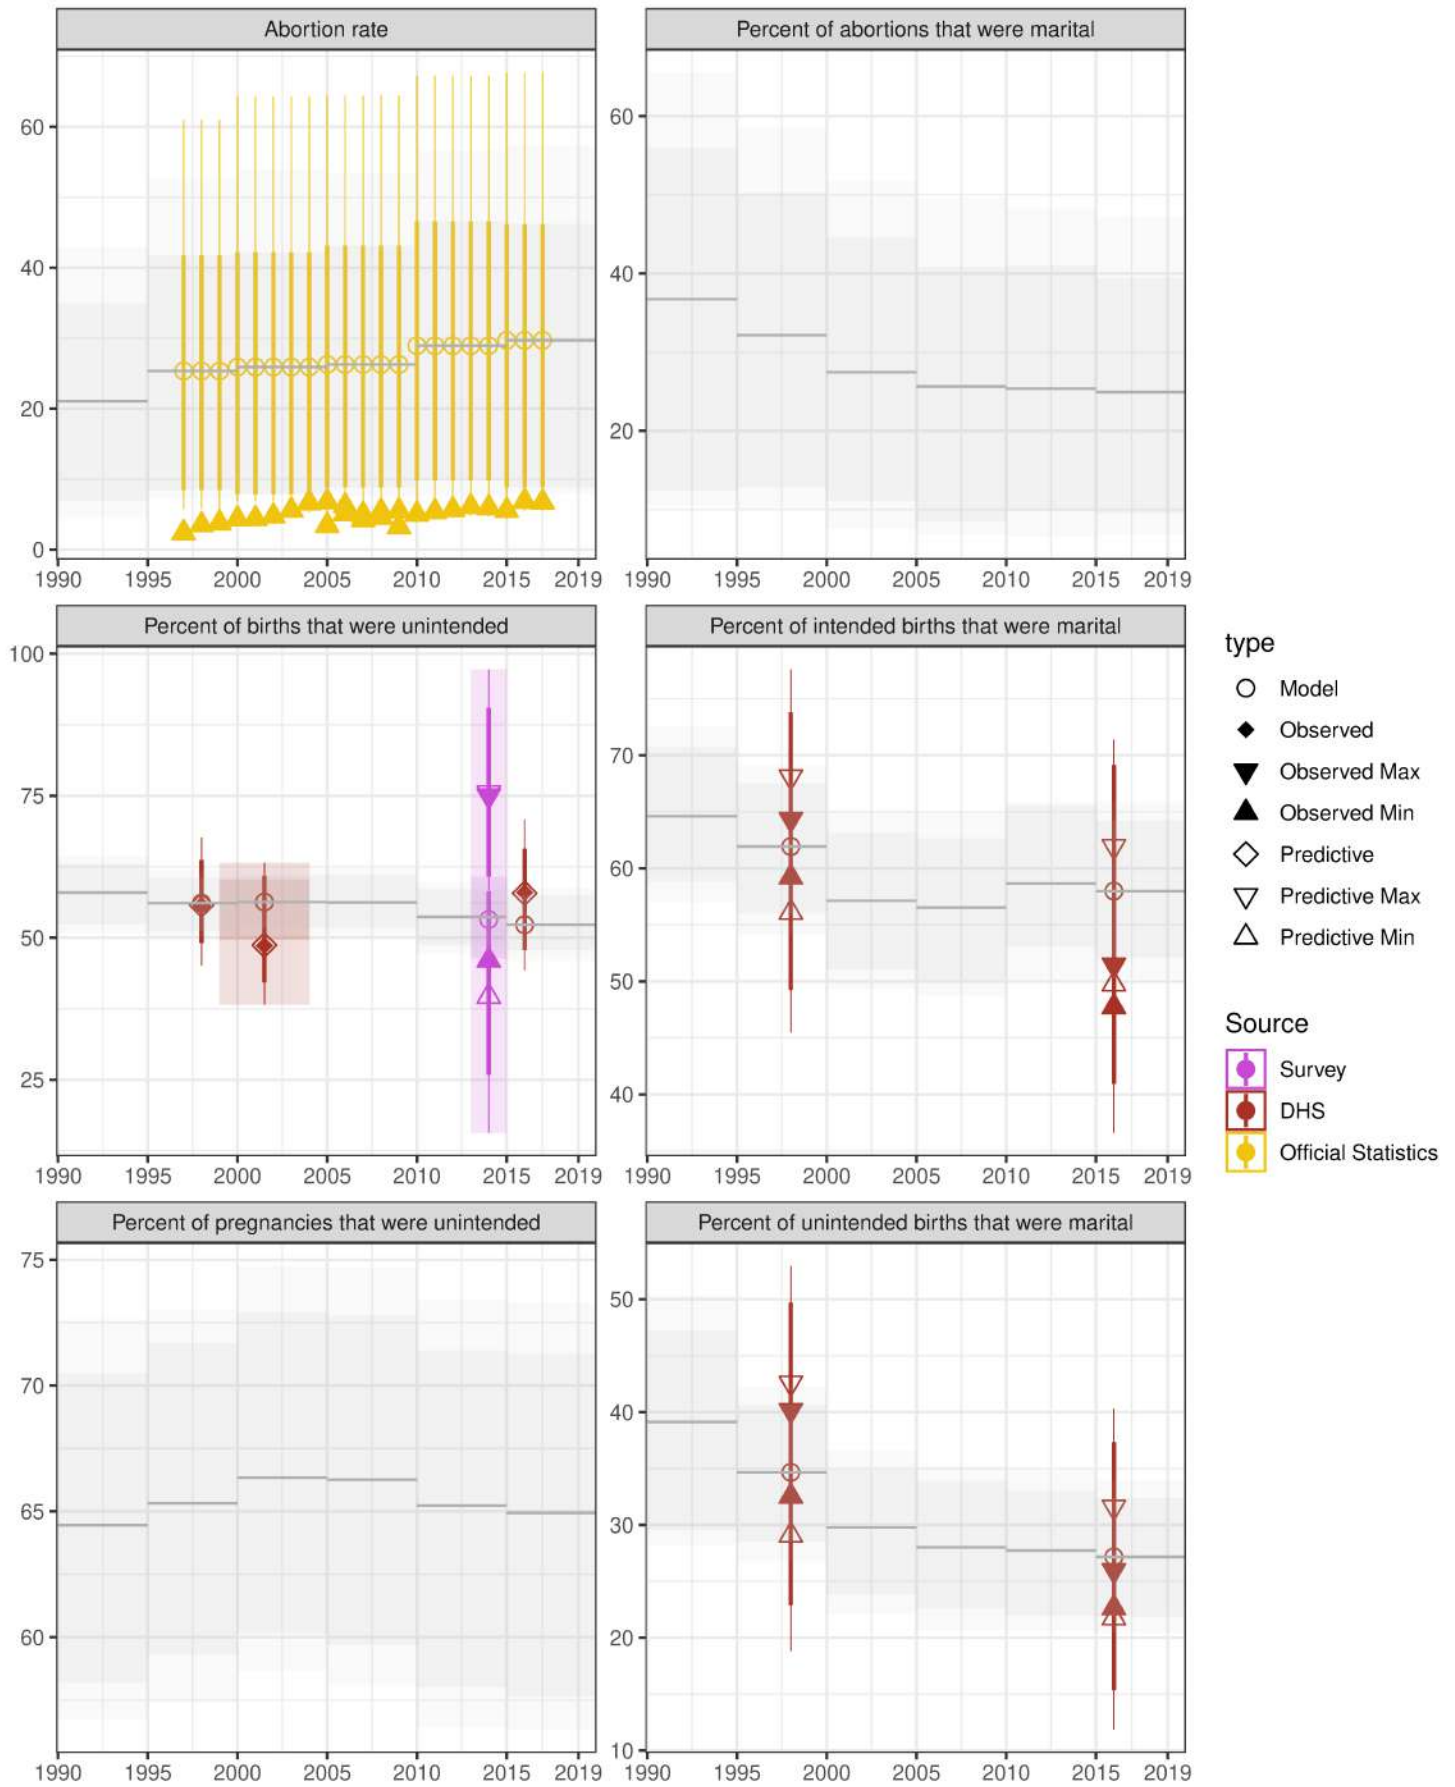

Note: Vertical lines and grey shading show 80% and 95% uncertainty intervals. Color shading shows when data were collected, if more than one year.

## 2 Western Asia



### Armenia

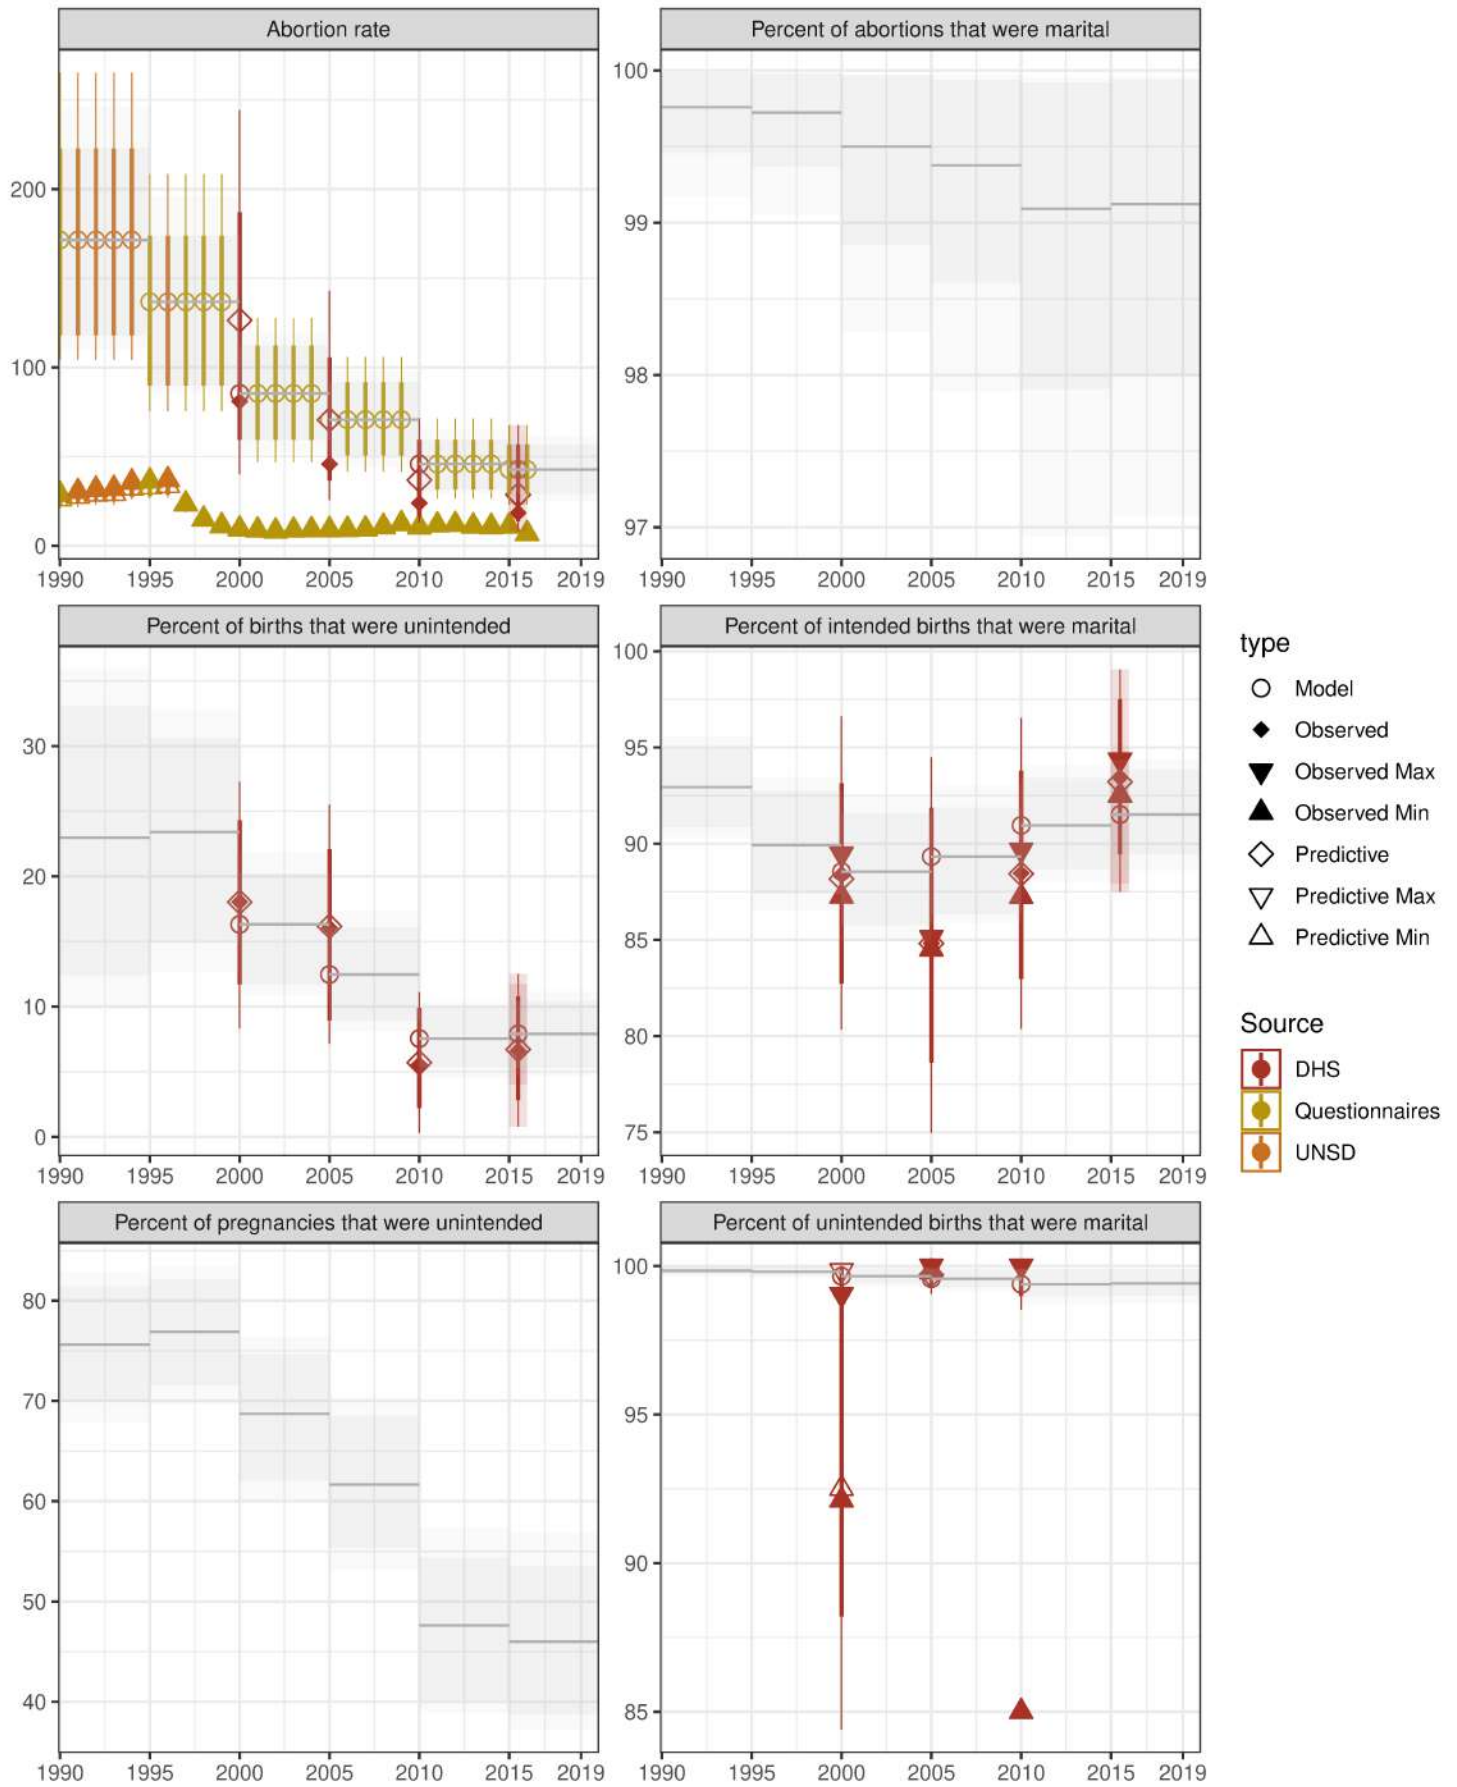

Note: Vertical lines and grey shading show 80% and 95% uncertainty intervals. Color shading shows when data were collected, if more than one year.

### Azerbaijan

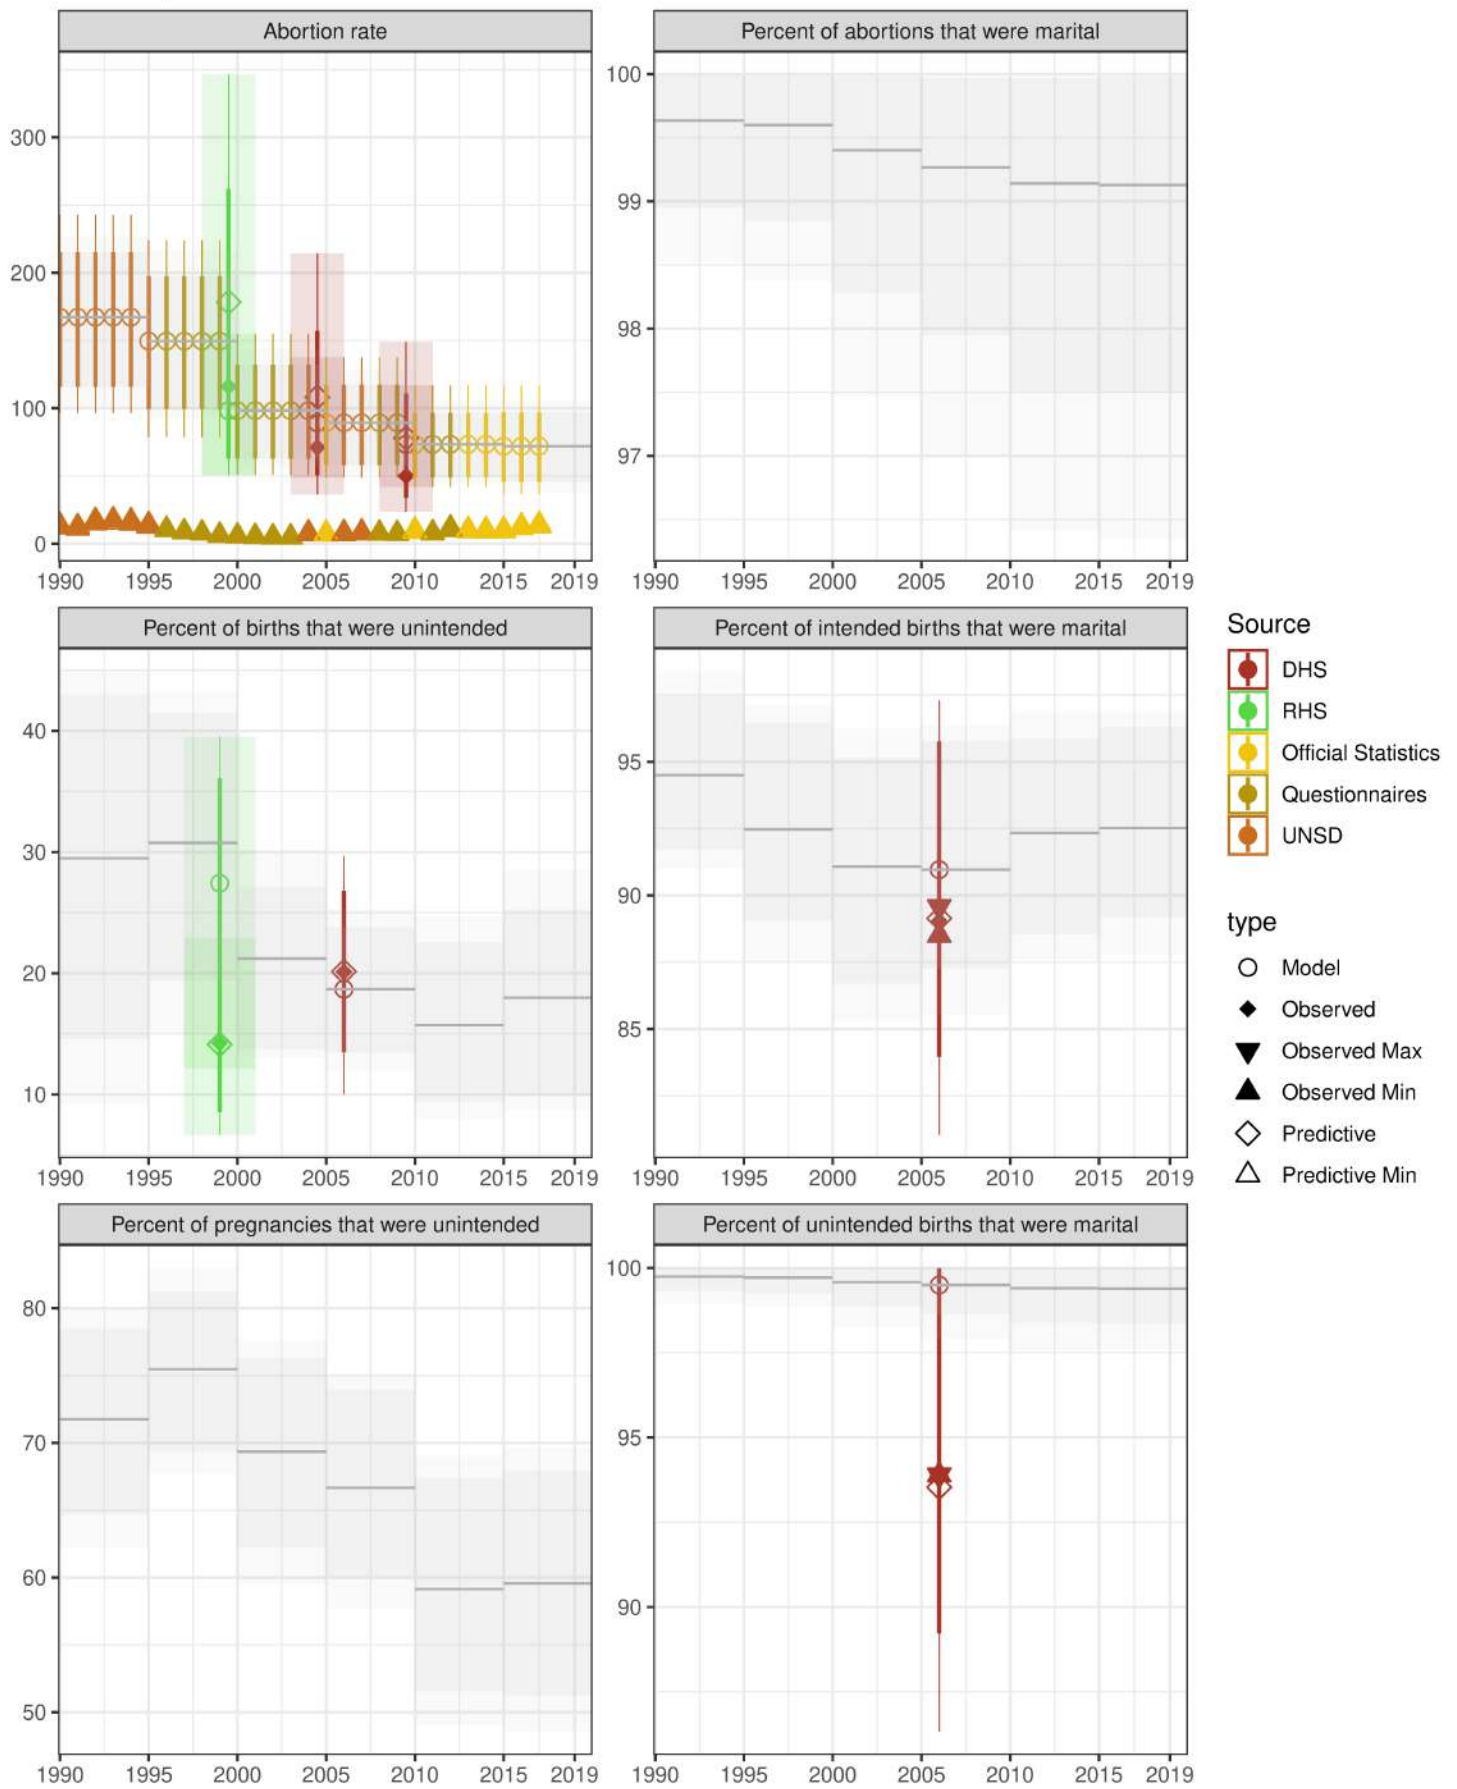

Note: Vertical lines and grey shading show 80% and 95% uncertainty intervals. Color shading shows when data were collected, if more than one year.

### Georgia

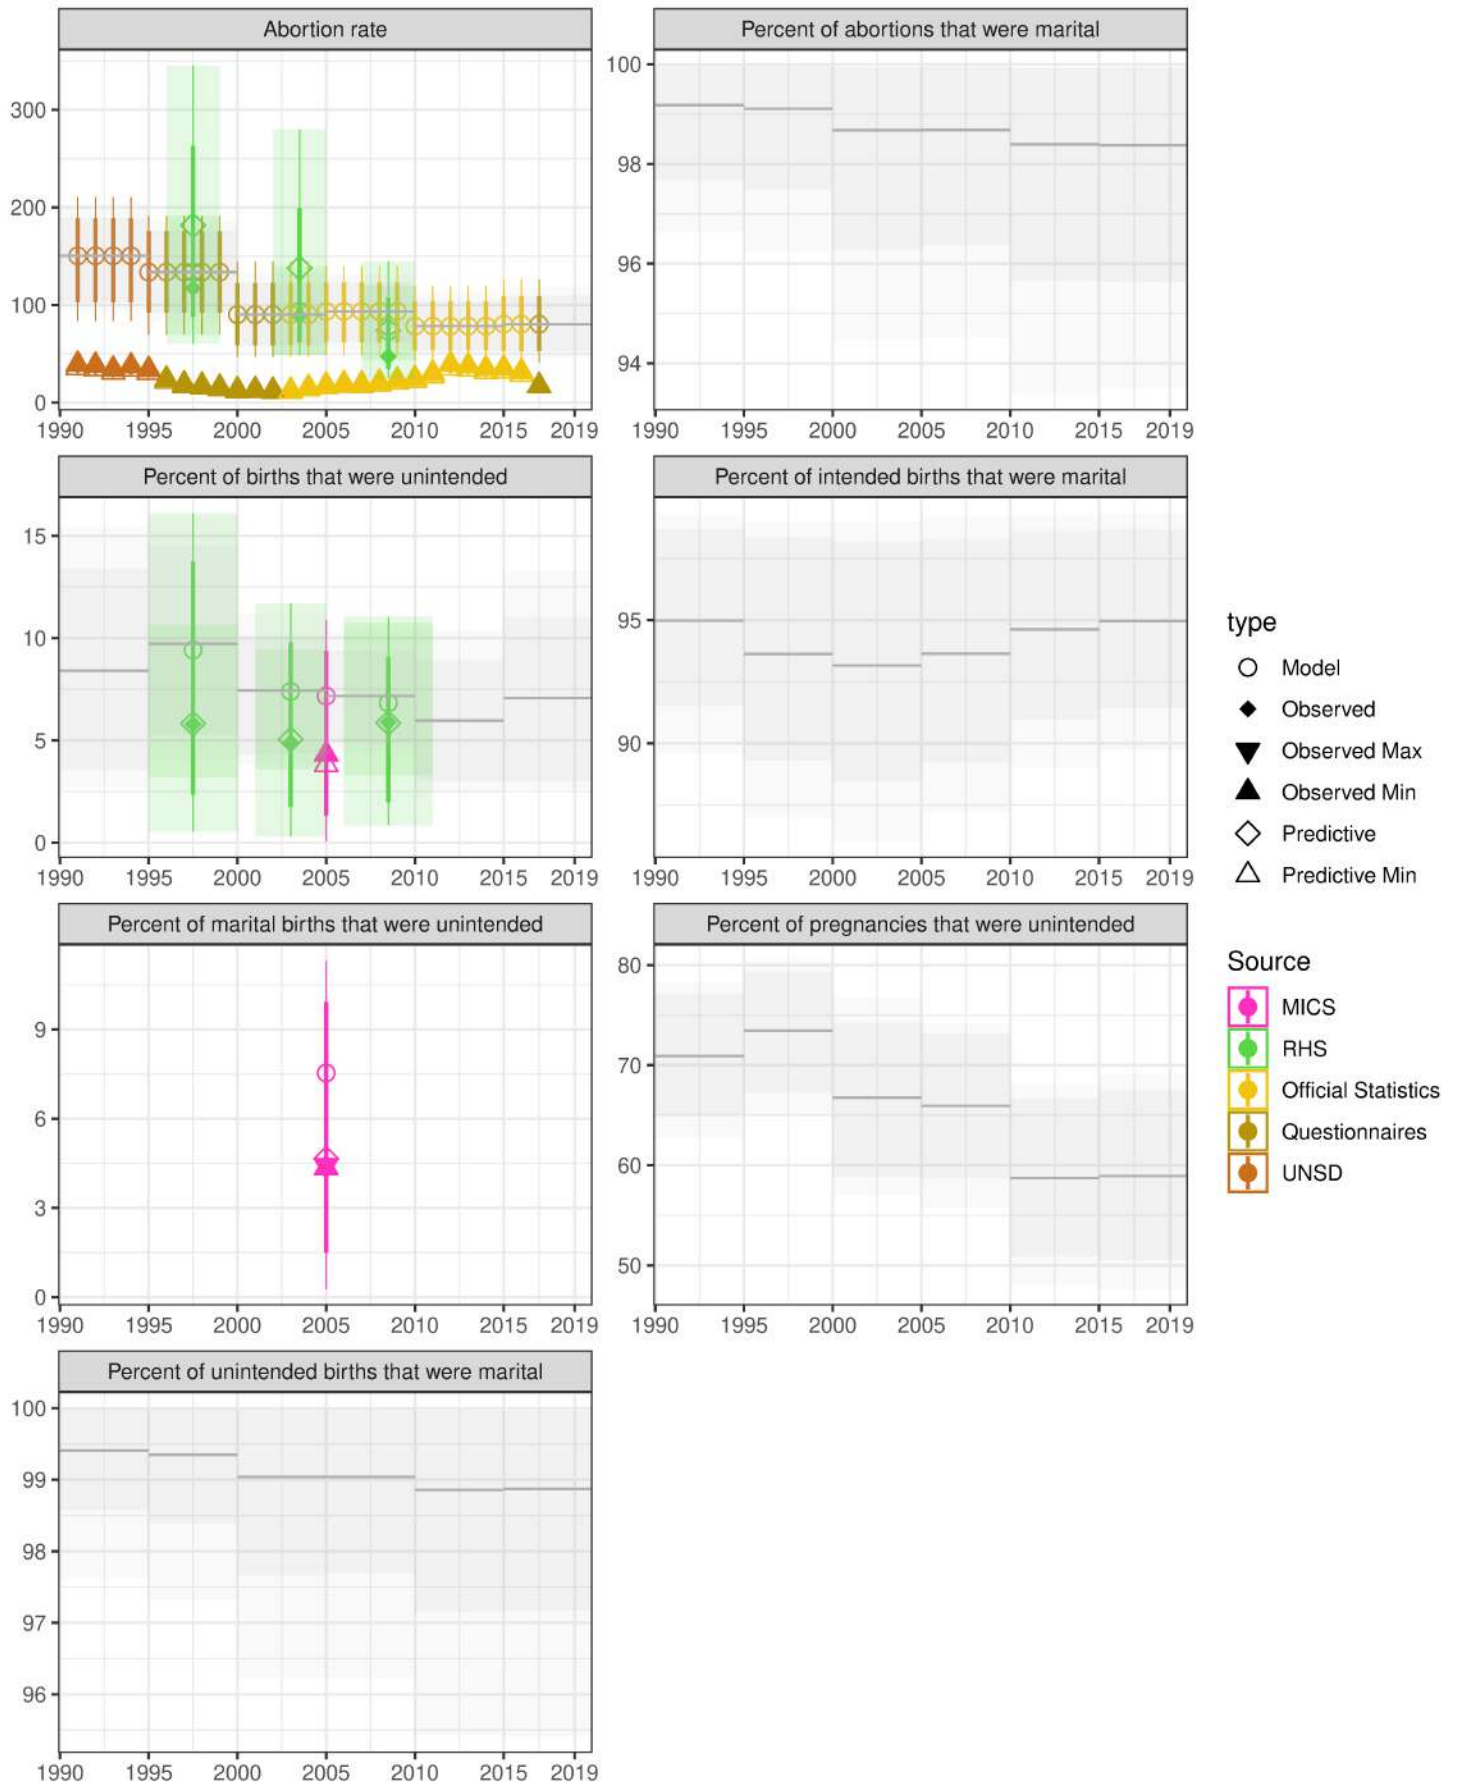

Note: Vertical lines and grey shading show 80% and 95% uncertainty intervals. Color shading shows when data were collected, if more than one year.

### **3 Central and Southern Asia**

#### **3.1 Central Asia**

### Kazakhstan

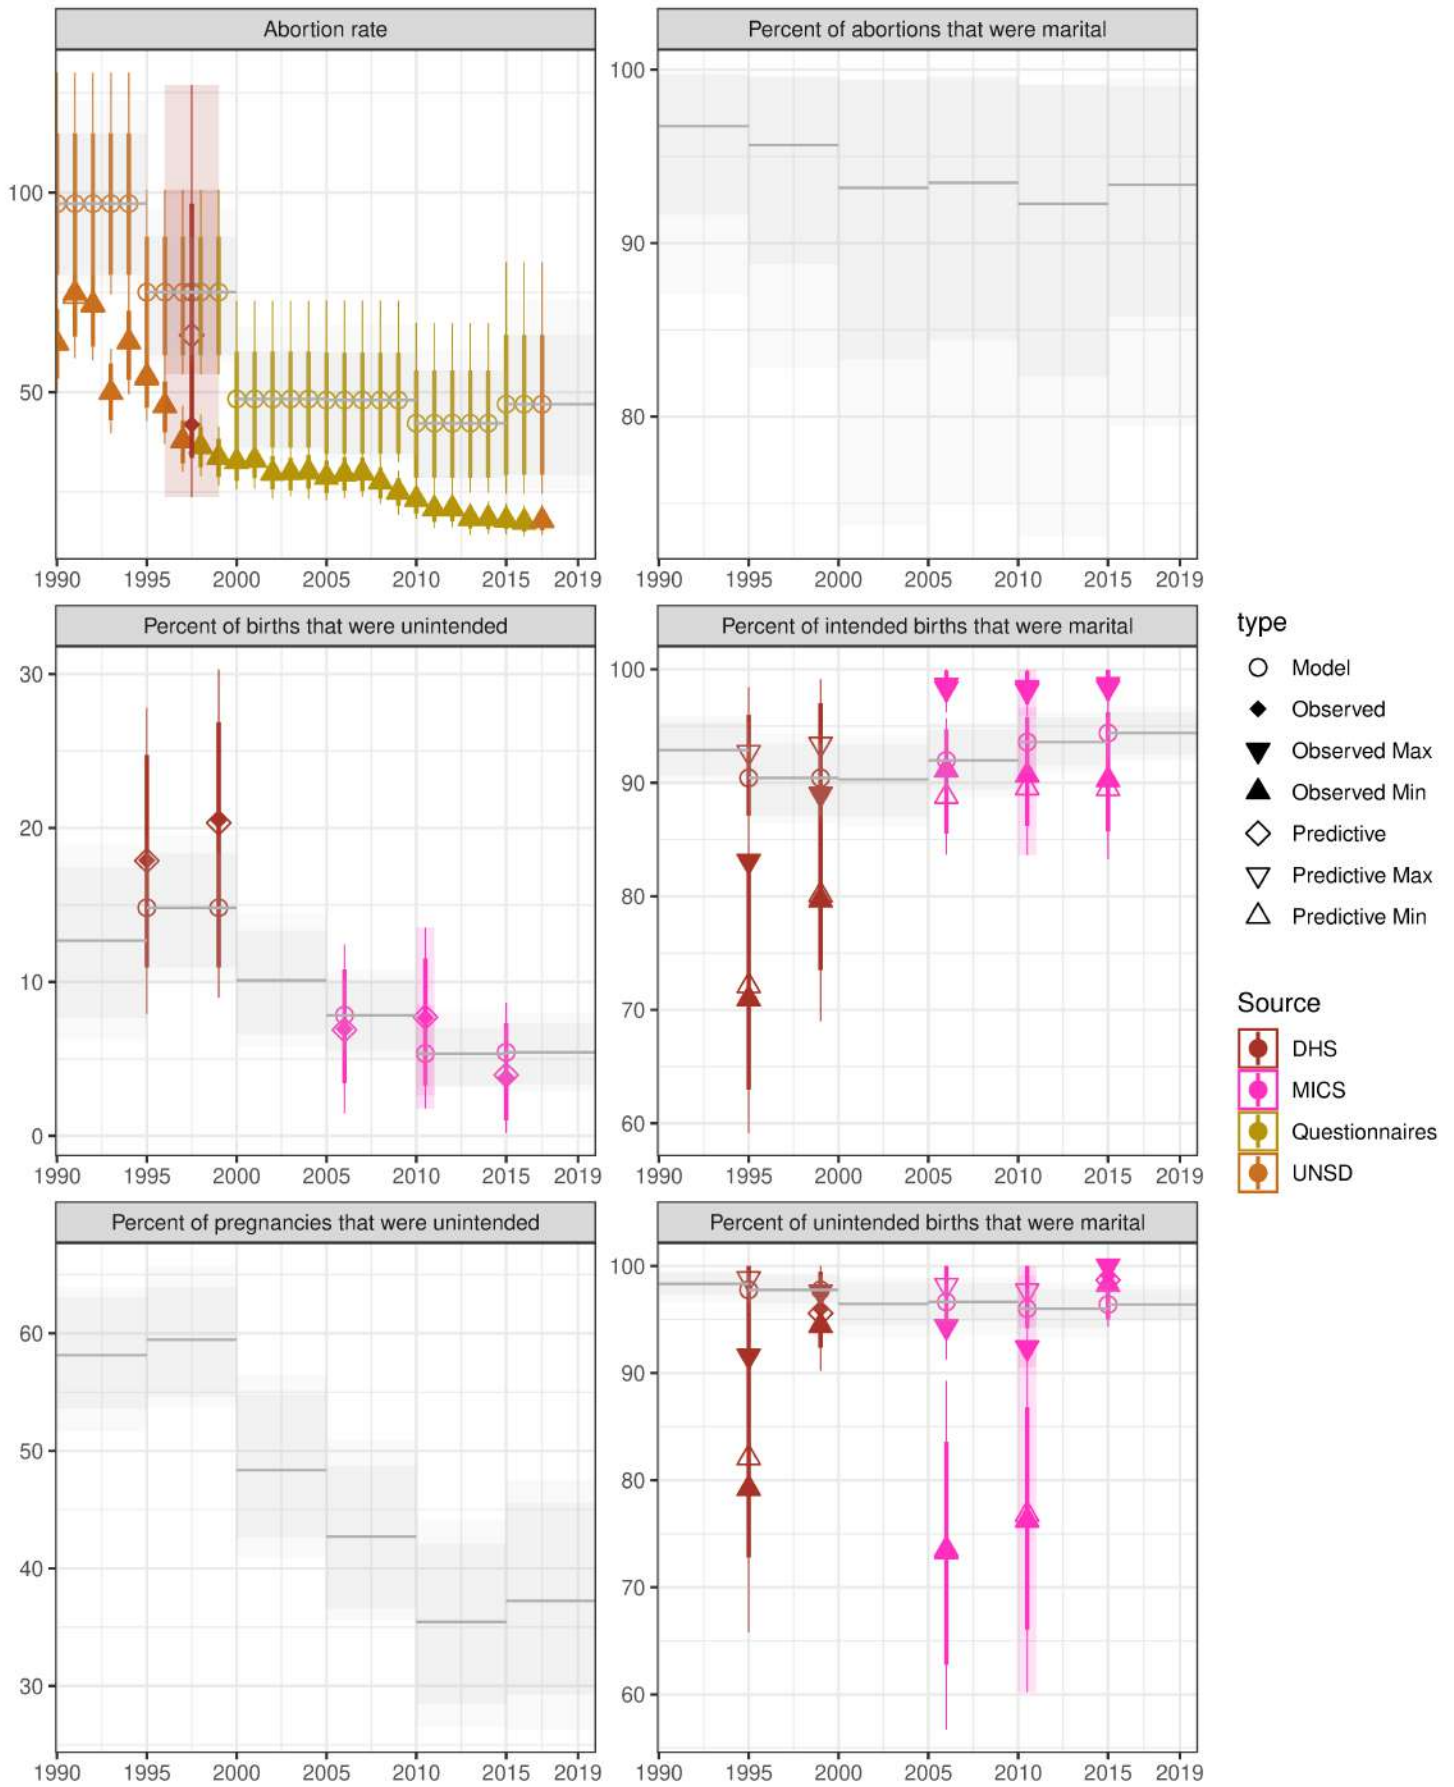

Note: Vertical lines and grey shading show 80% and 95% uncertainty intervals. Color shading shows when data were collected, if more than one year.

### Kyrgyzstan

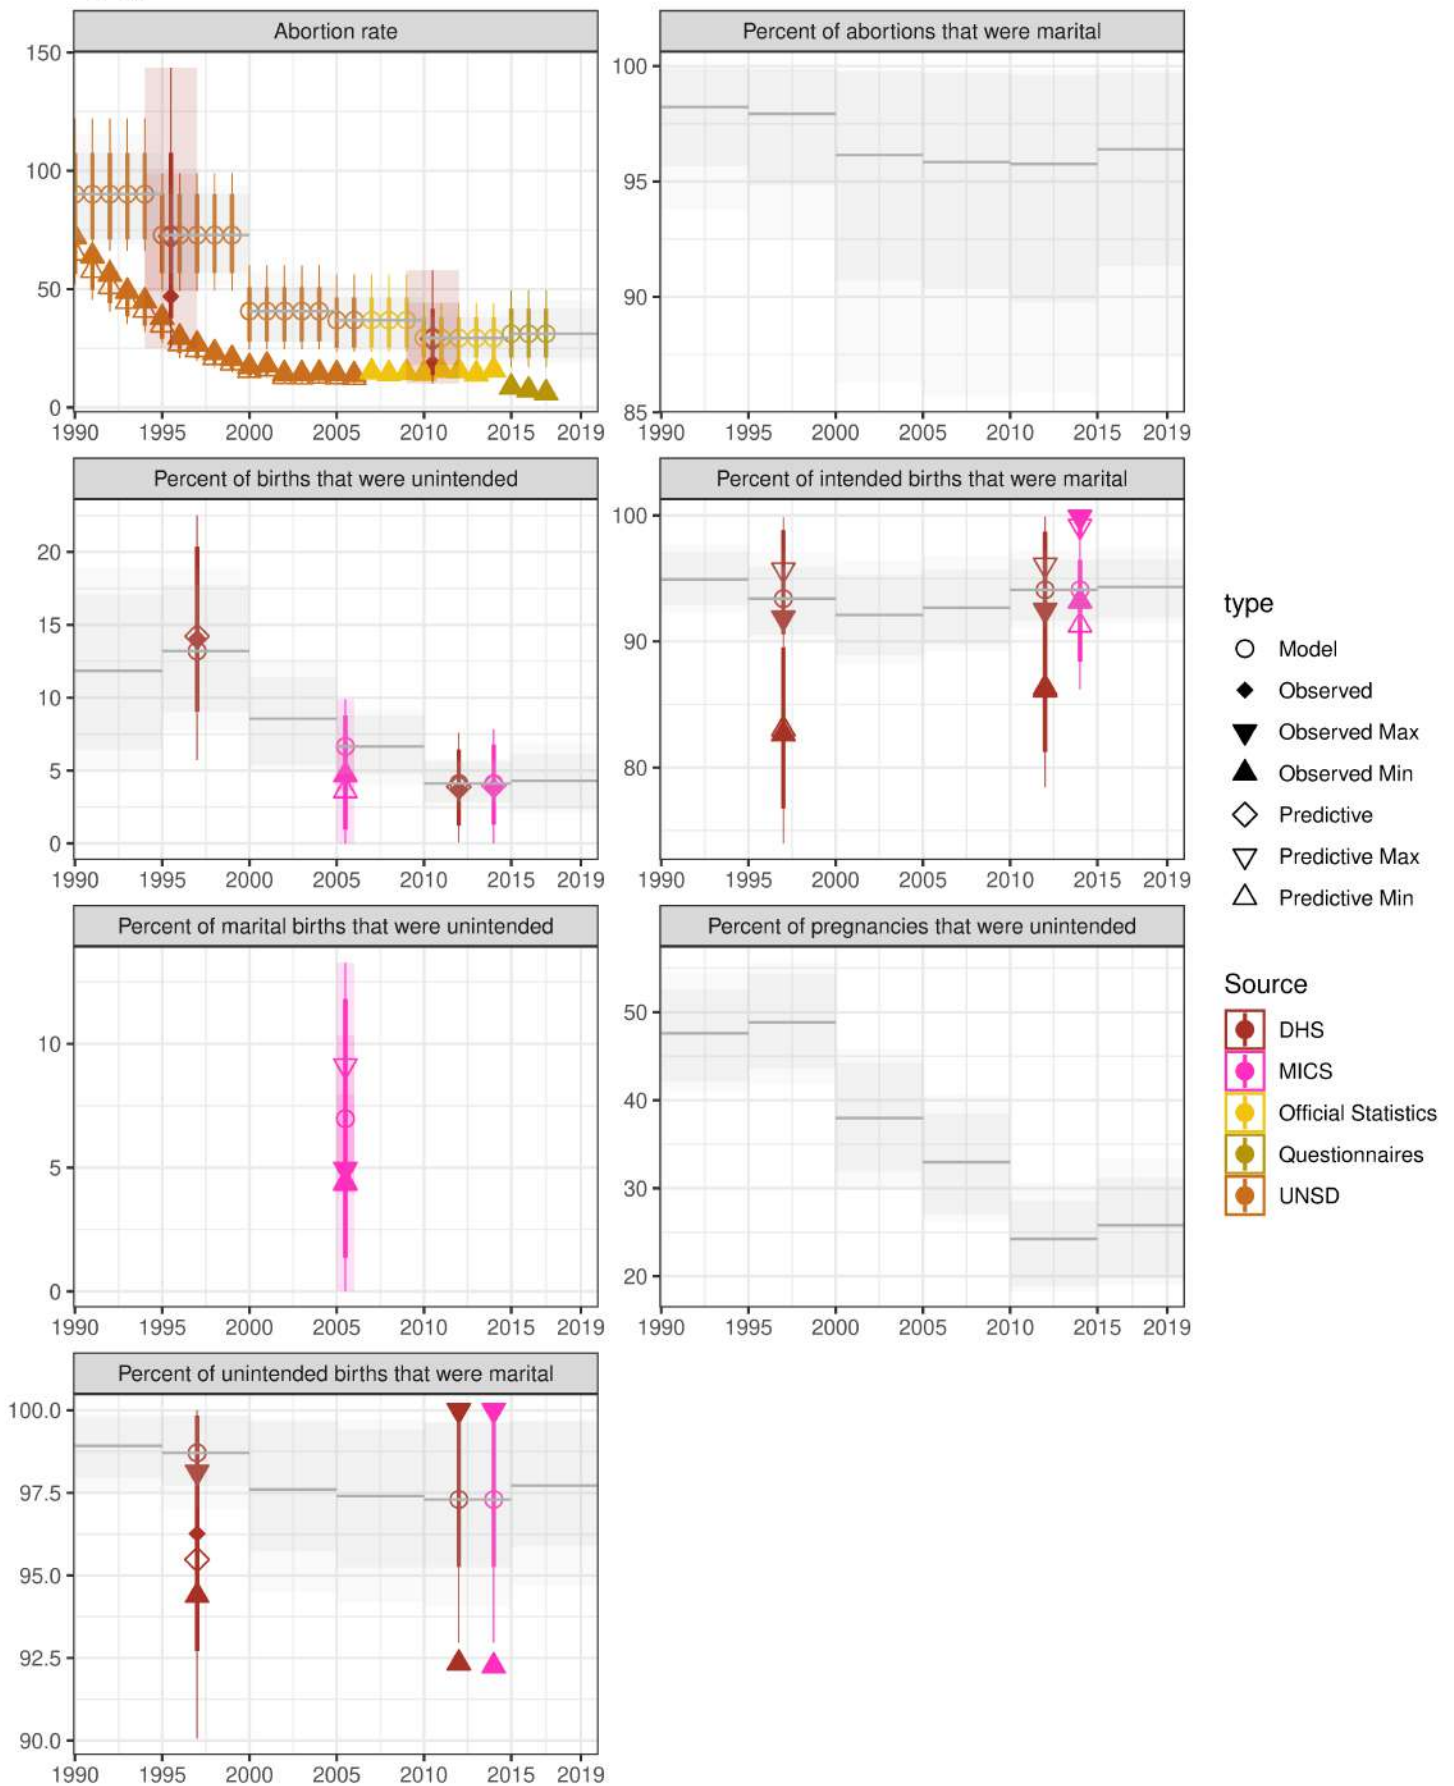

Note: Vertical lines and grey shading show 80% and 95% uncertainty intervals. Color shading shows when data were collected, if more than one year.

### Tajikistan

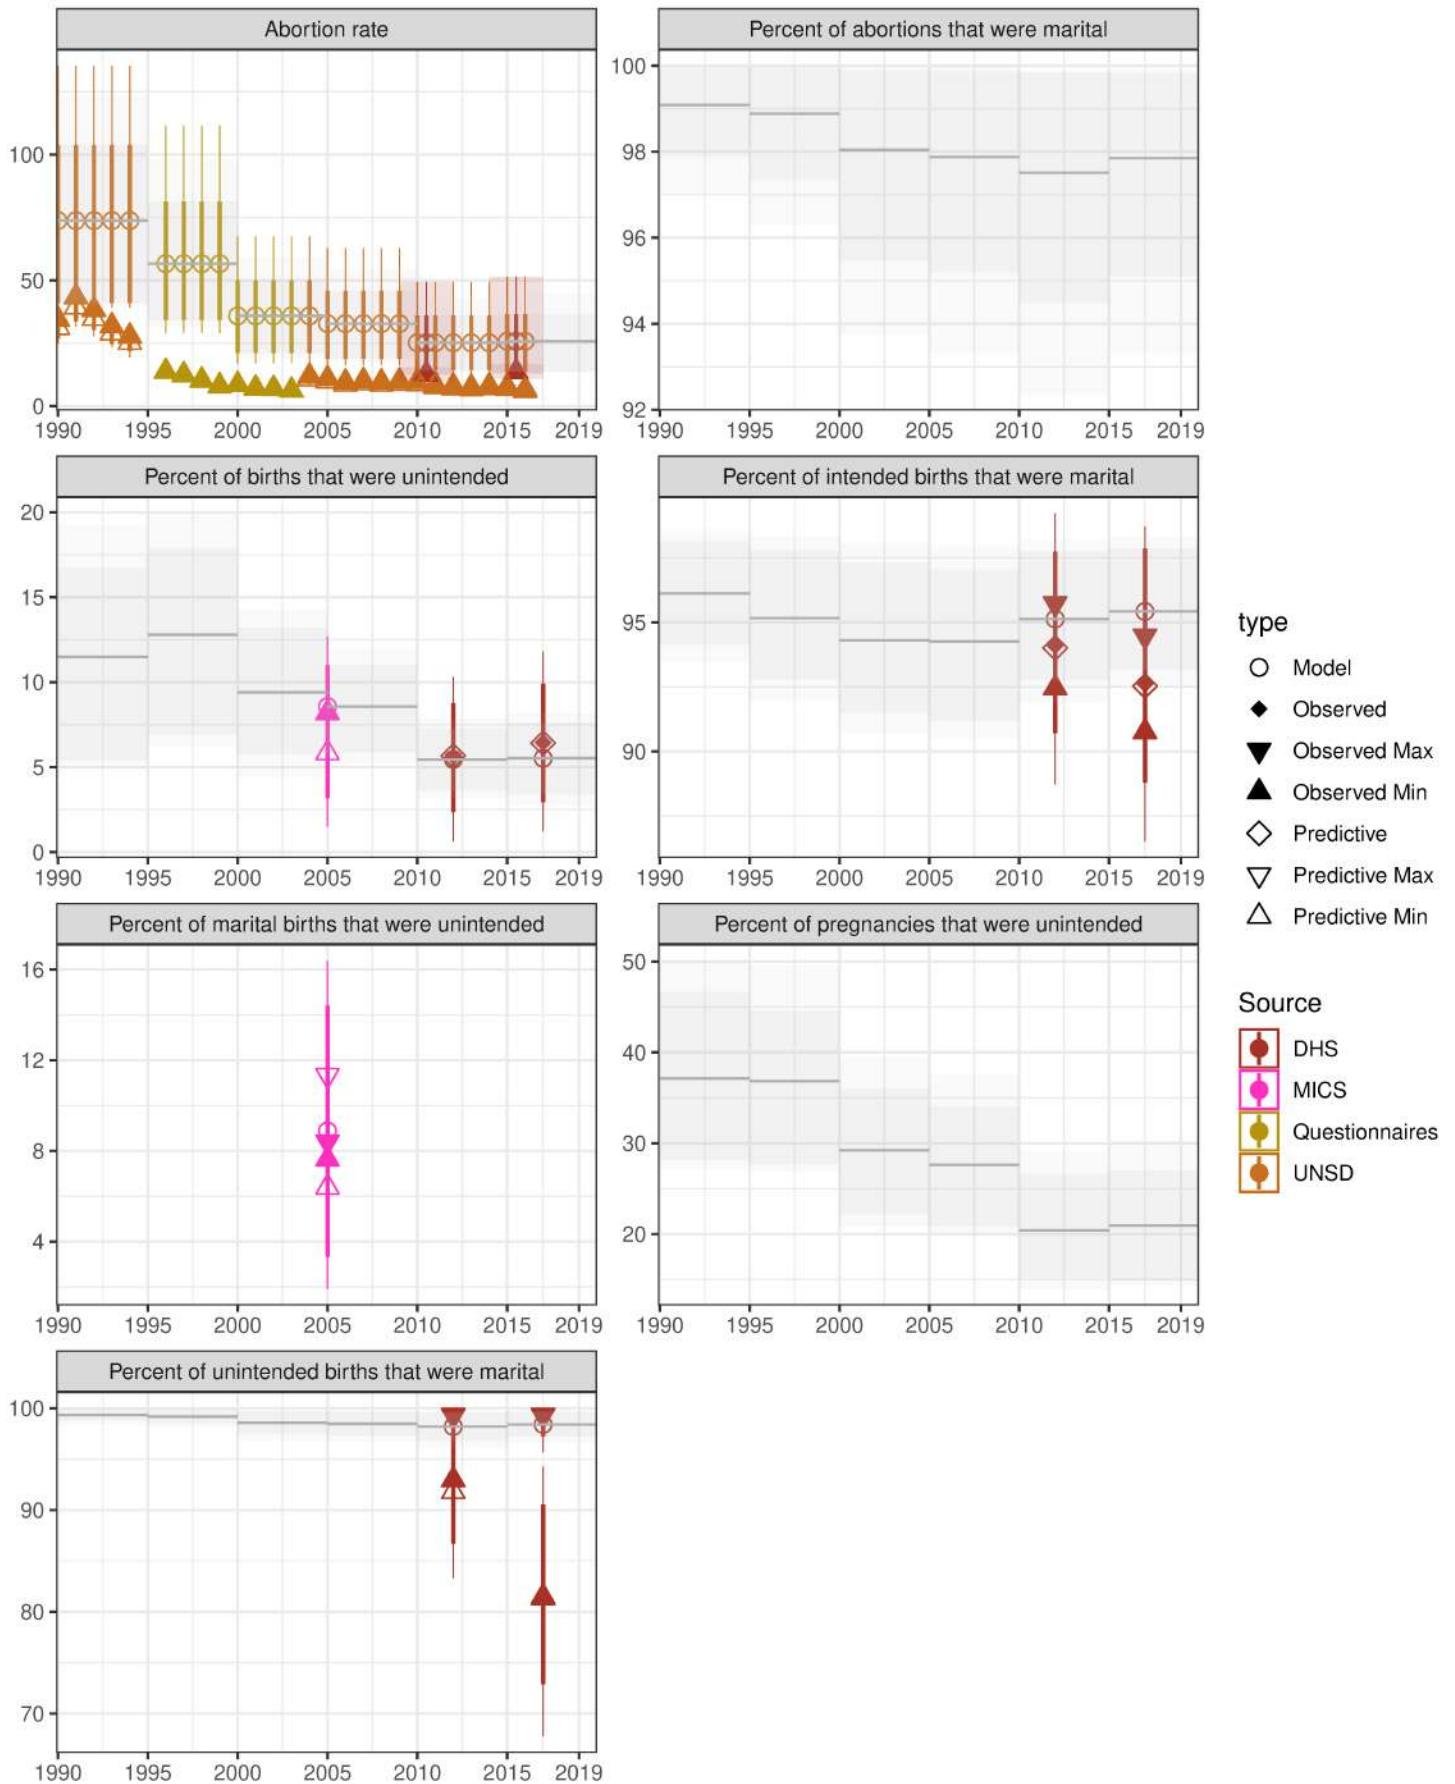

Note: Vertical lines and grey shading show 80% and 95% uncertainty intervals. Color shading shows when data were collected, if more than one year.

### Turkmenistan

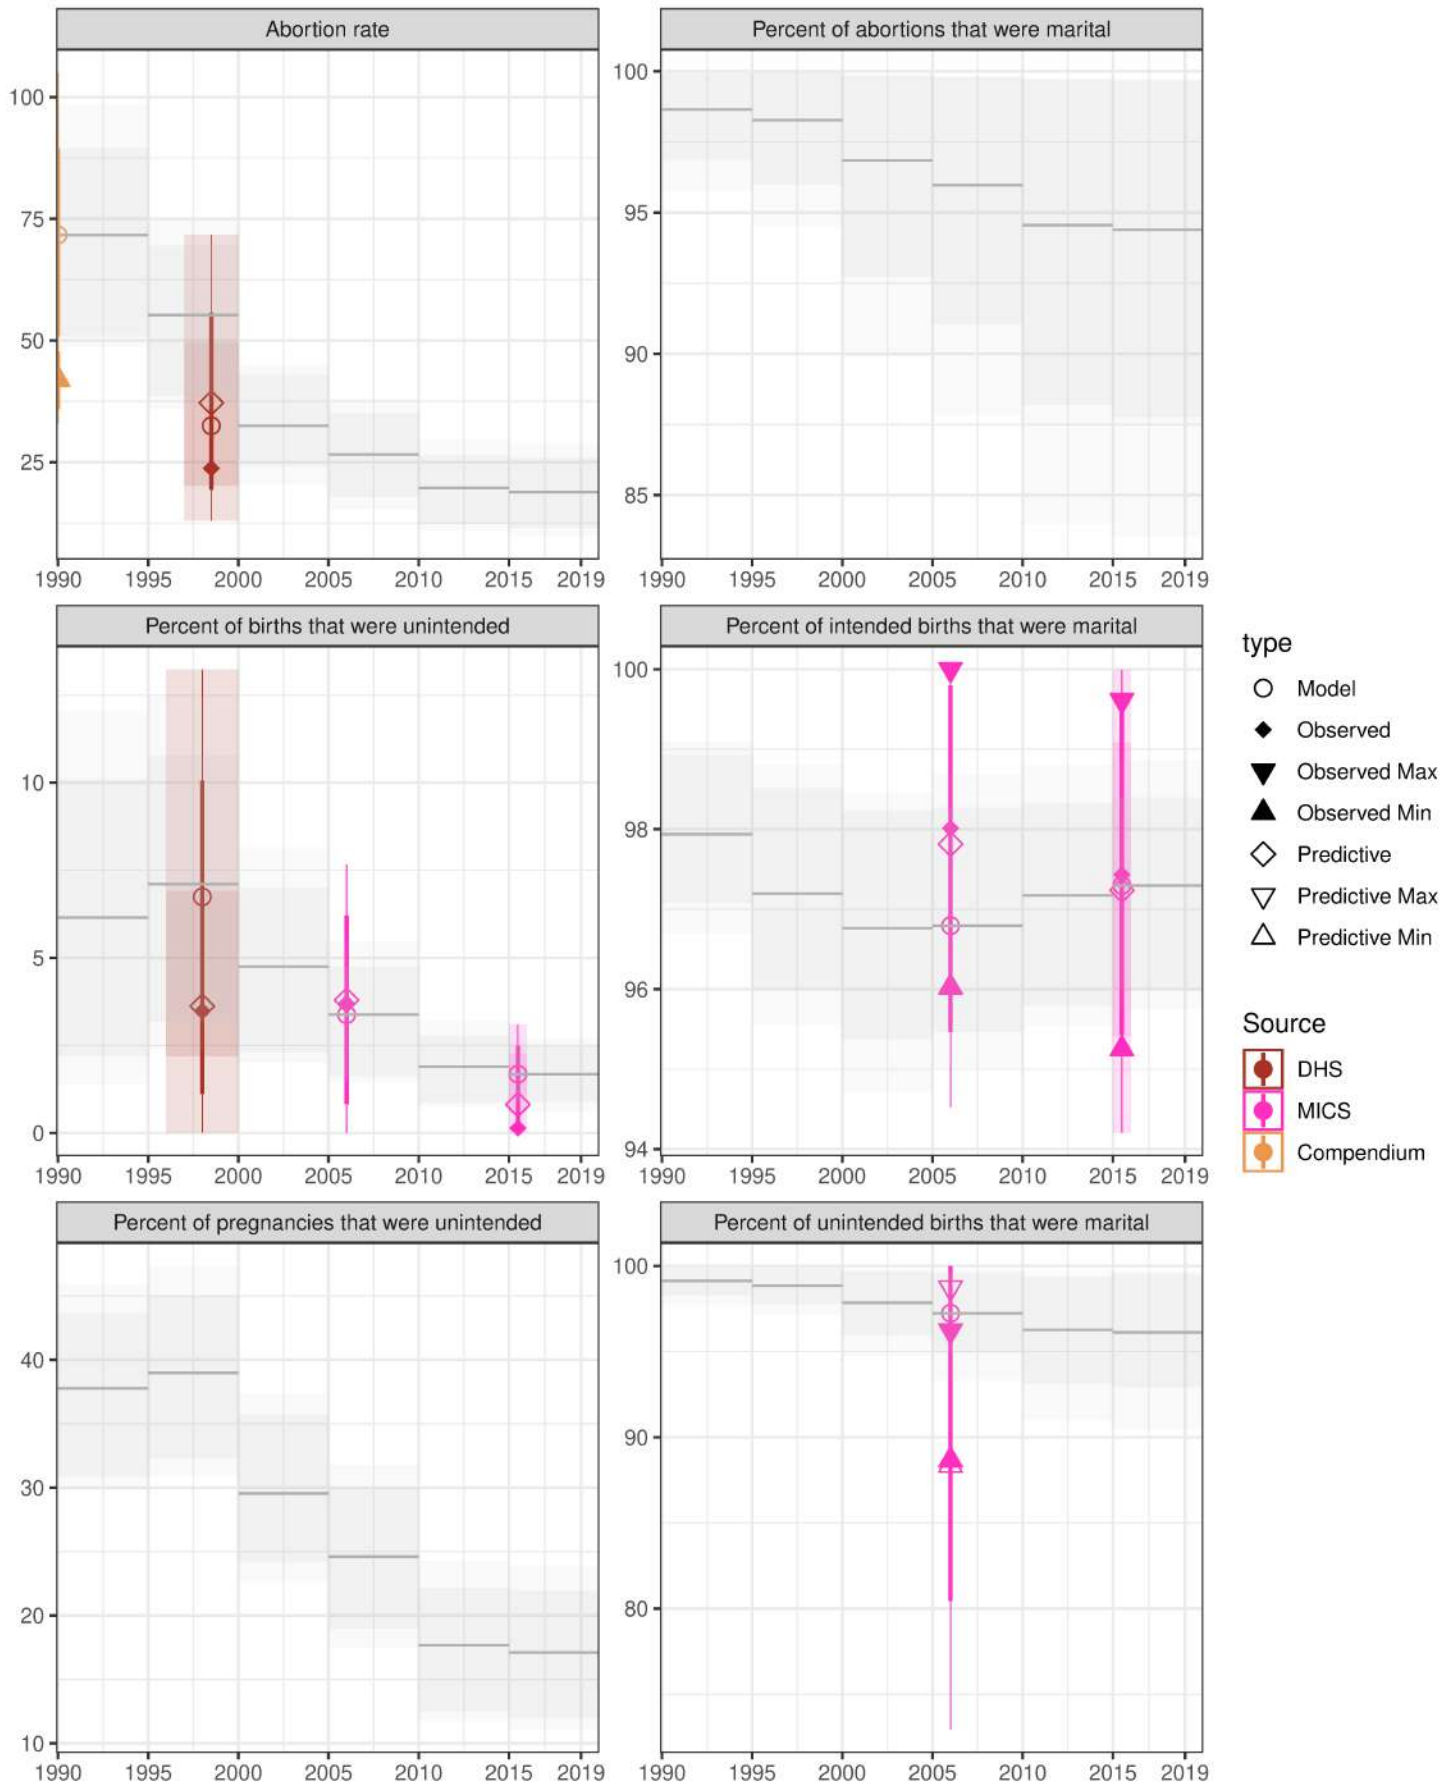

Note: Vertical lines and grey shading show 80% and 95% uncertainty intervals. Color shading shows when data were collected, if more than one year.



### Uzbekistan

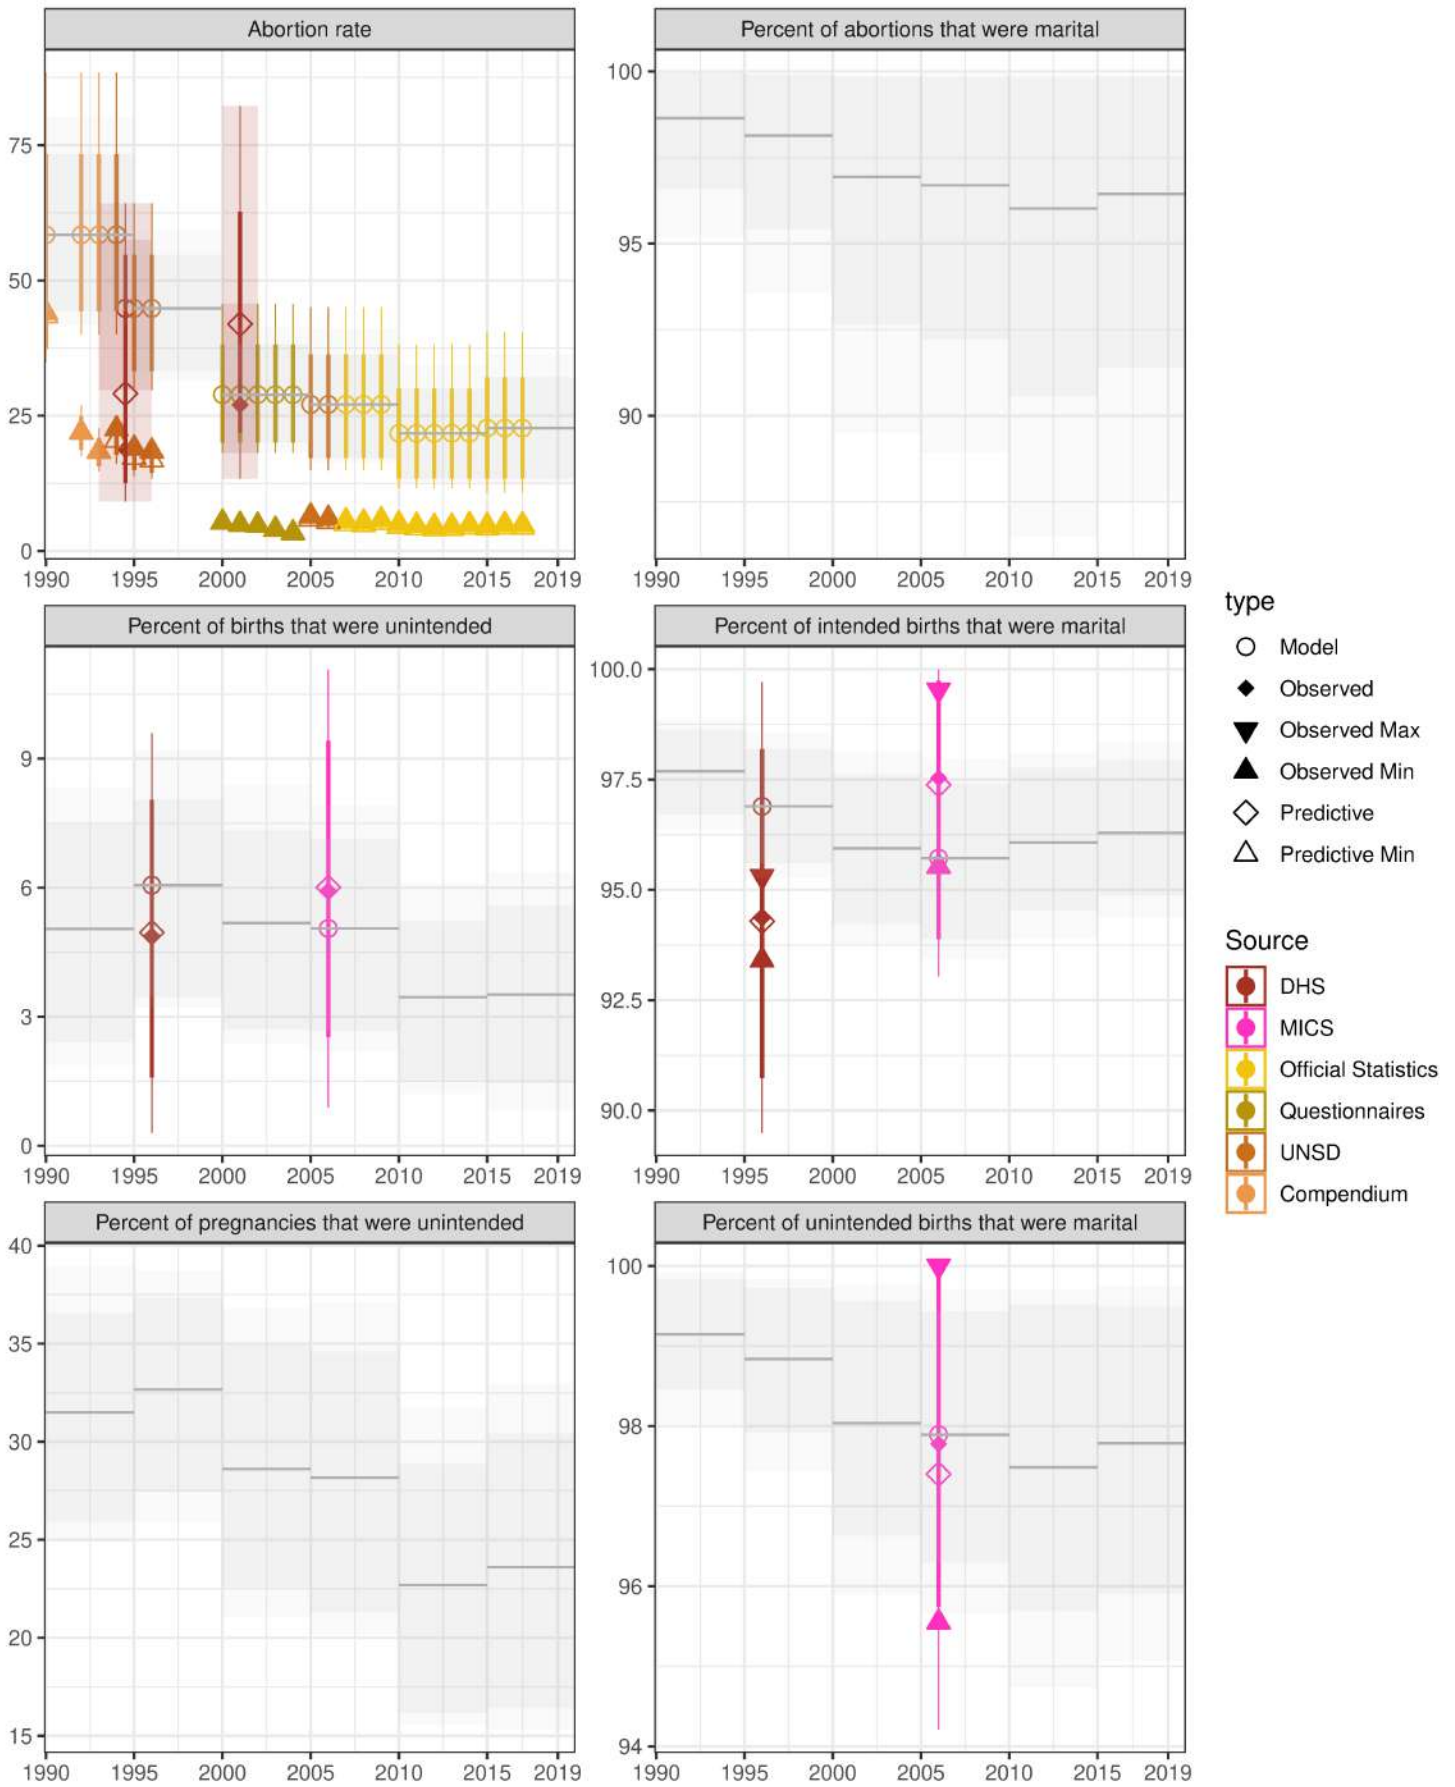

## 3.2 Southern Asia

### Bangladesh

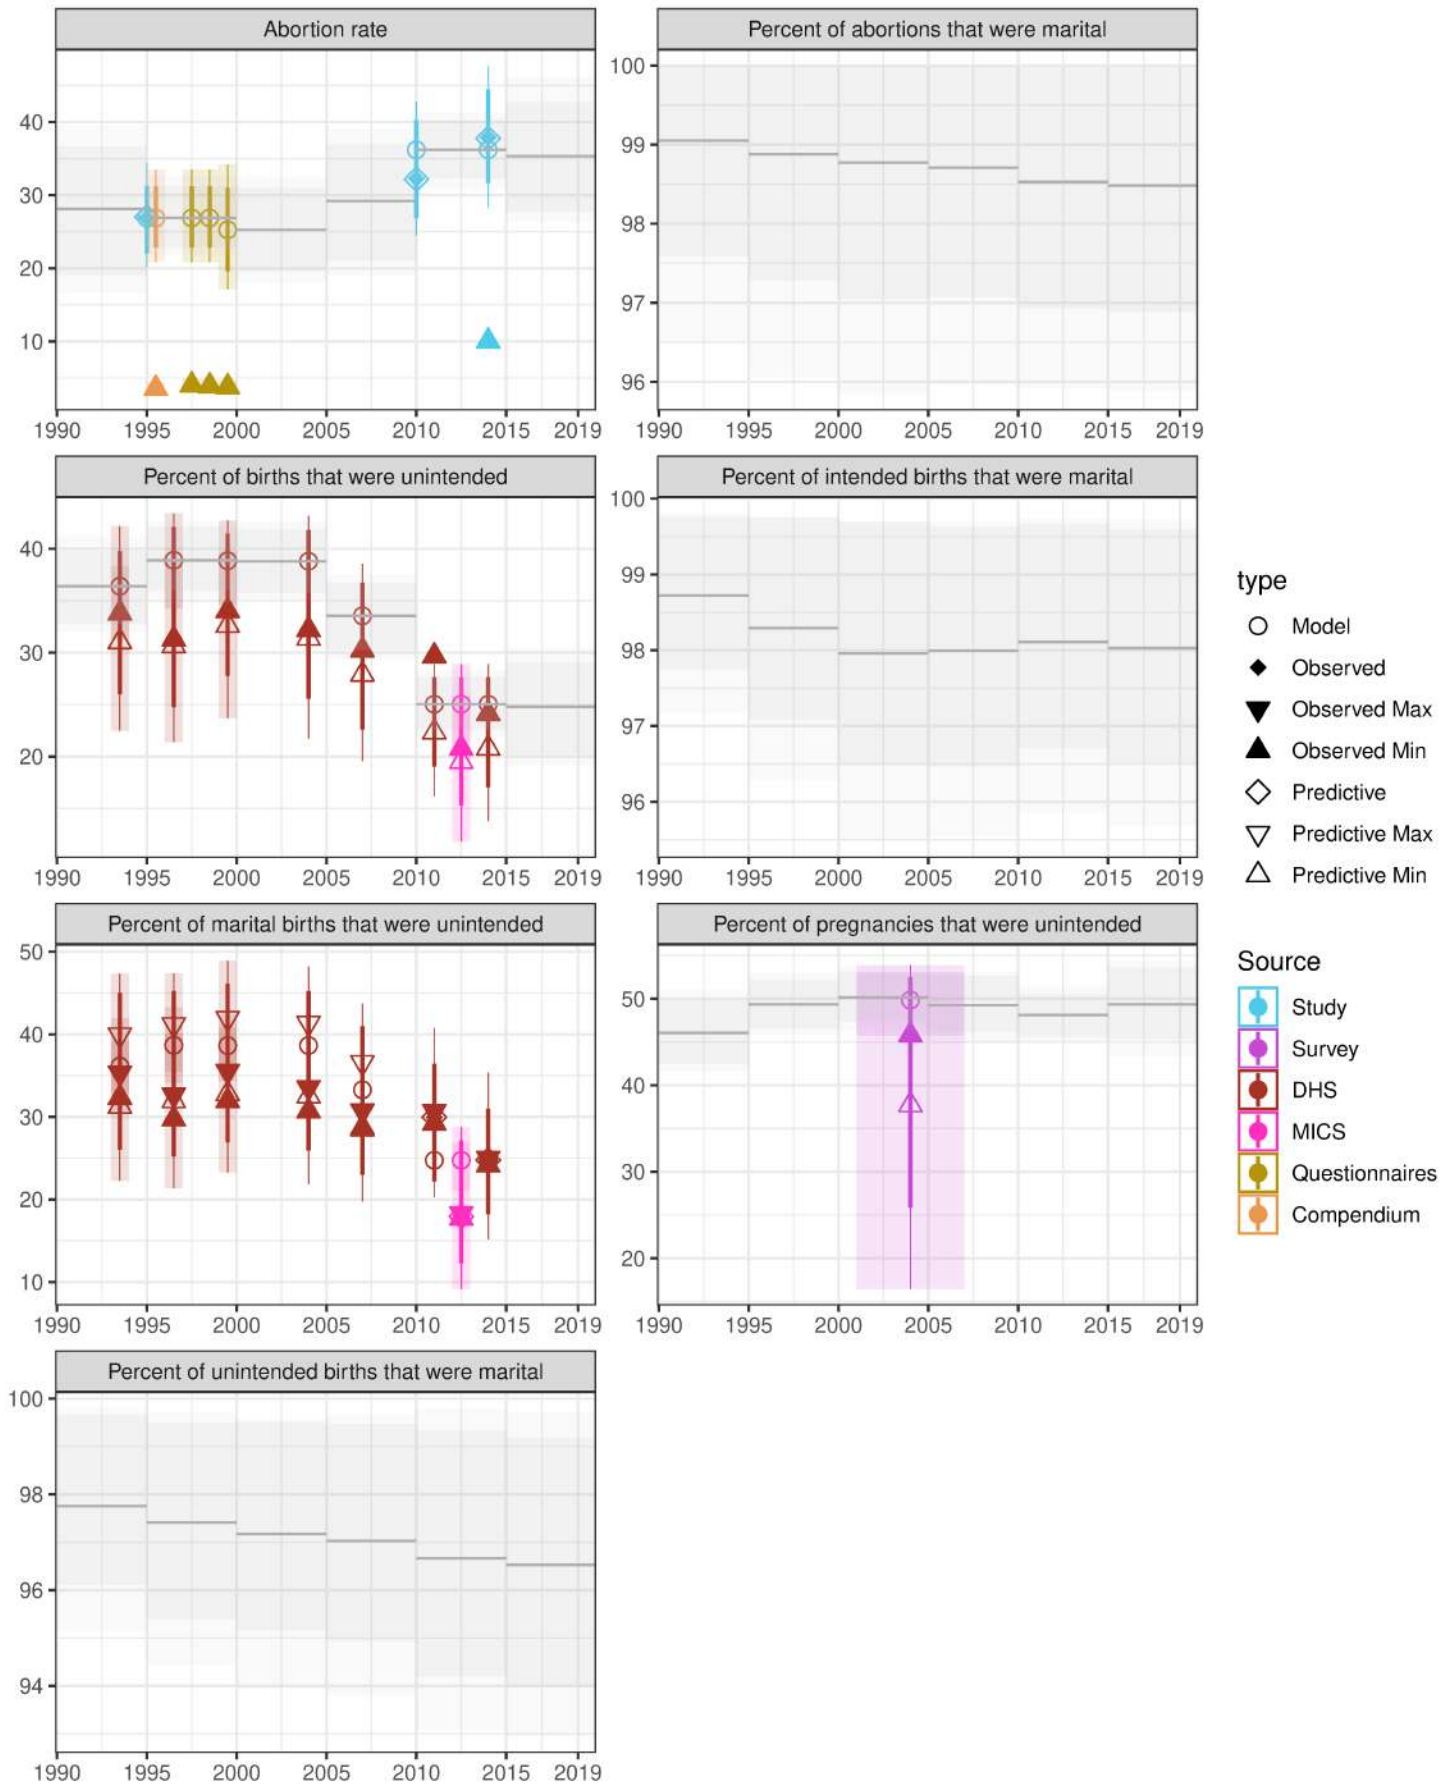

Note: Vertical lines and grey shading show 80% and 95% uncertainty intervals. Color shading shows when data were collected, if more than one year.

### Bhutan

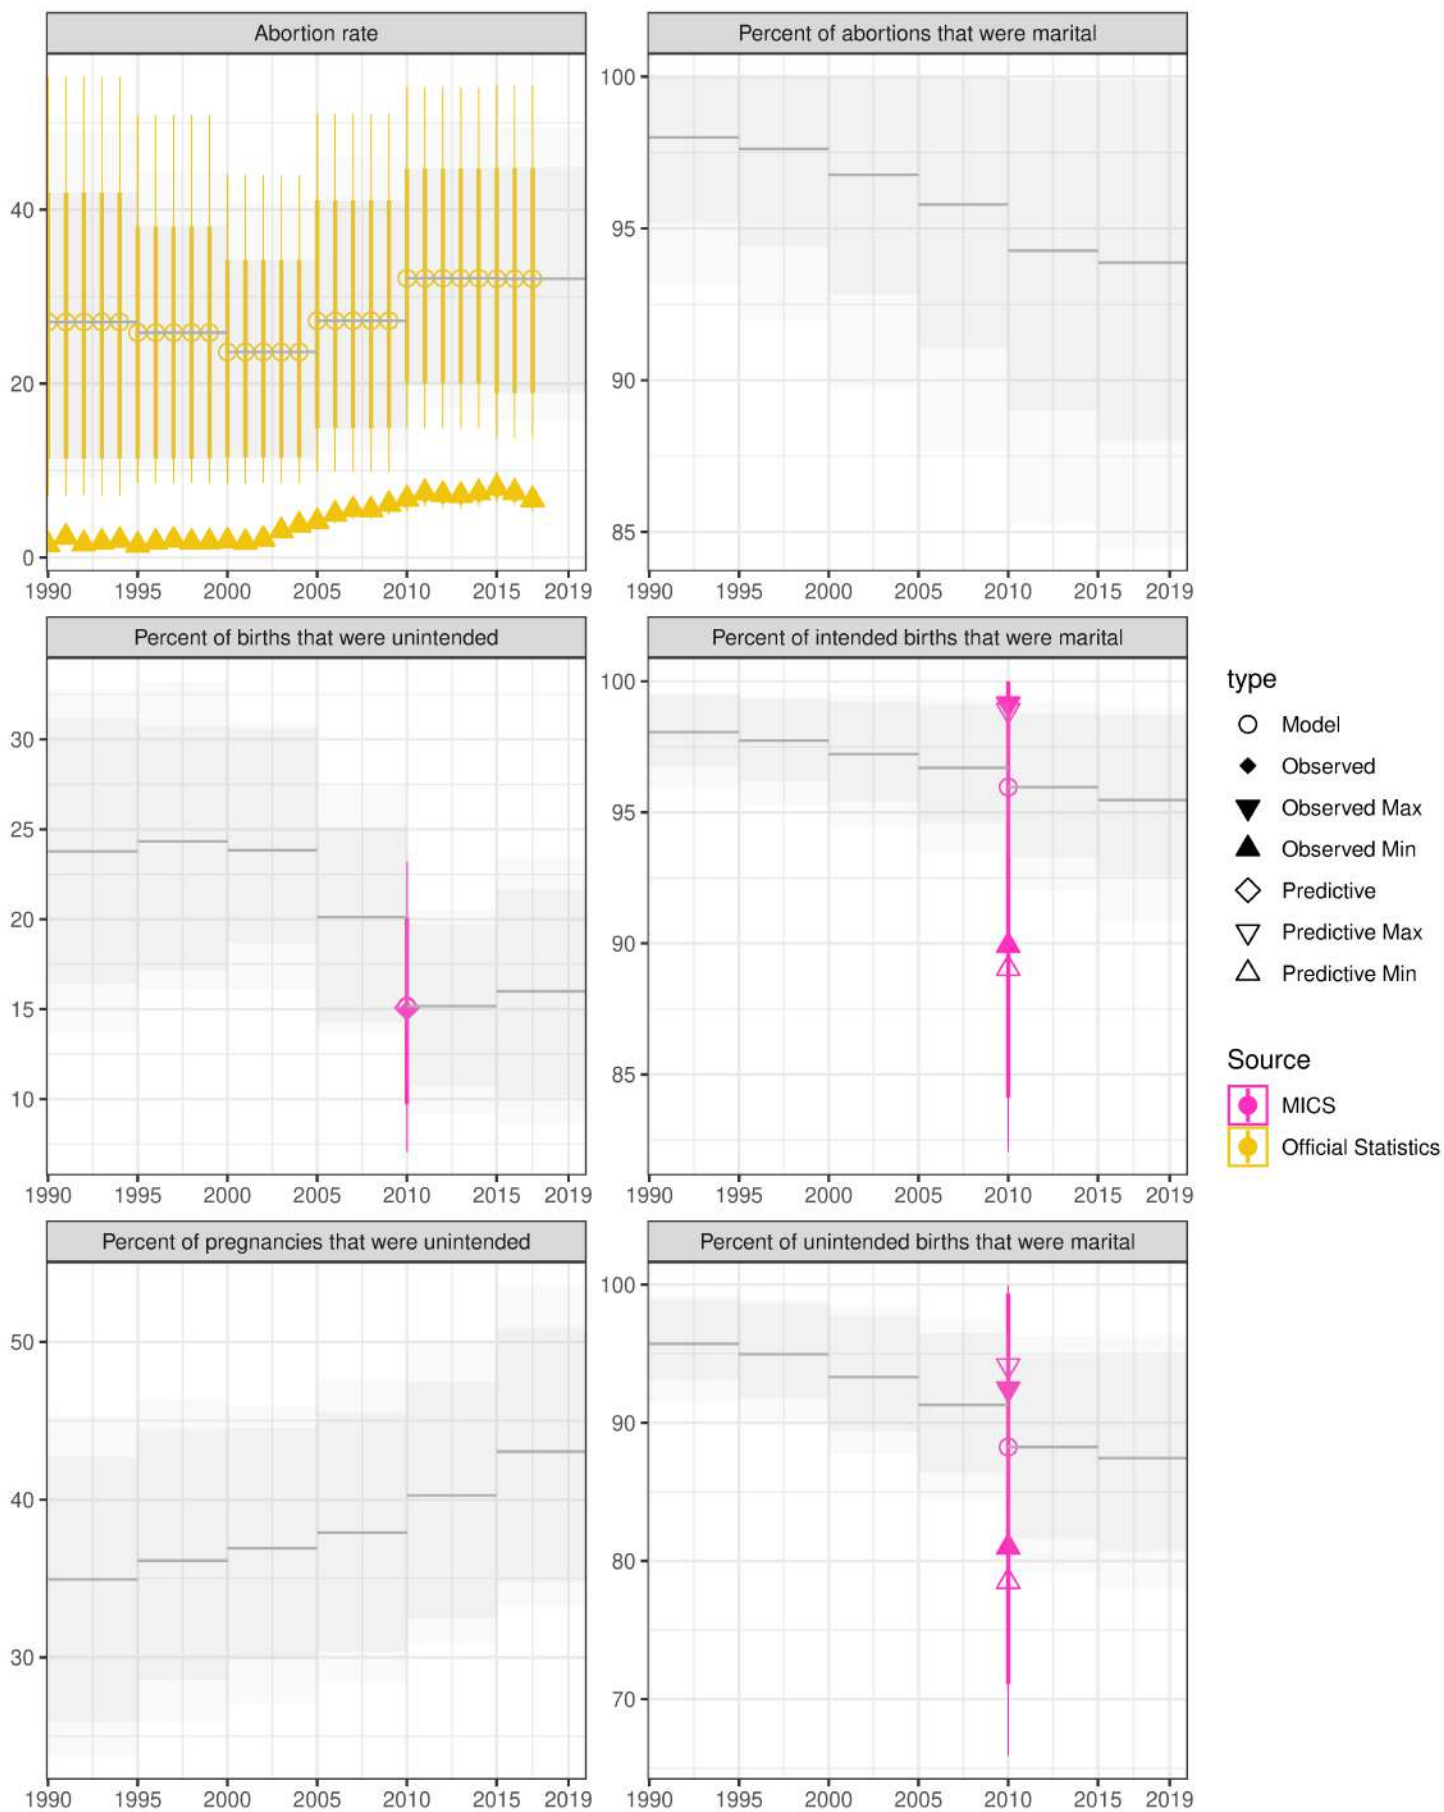

### India

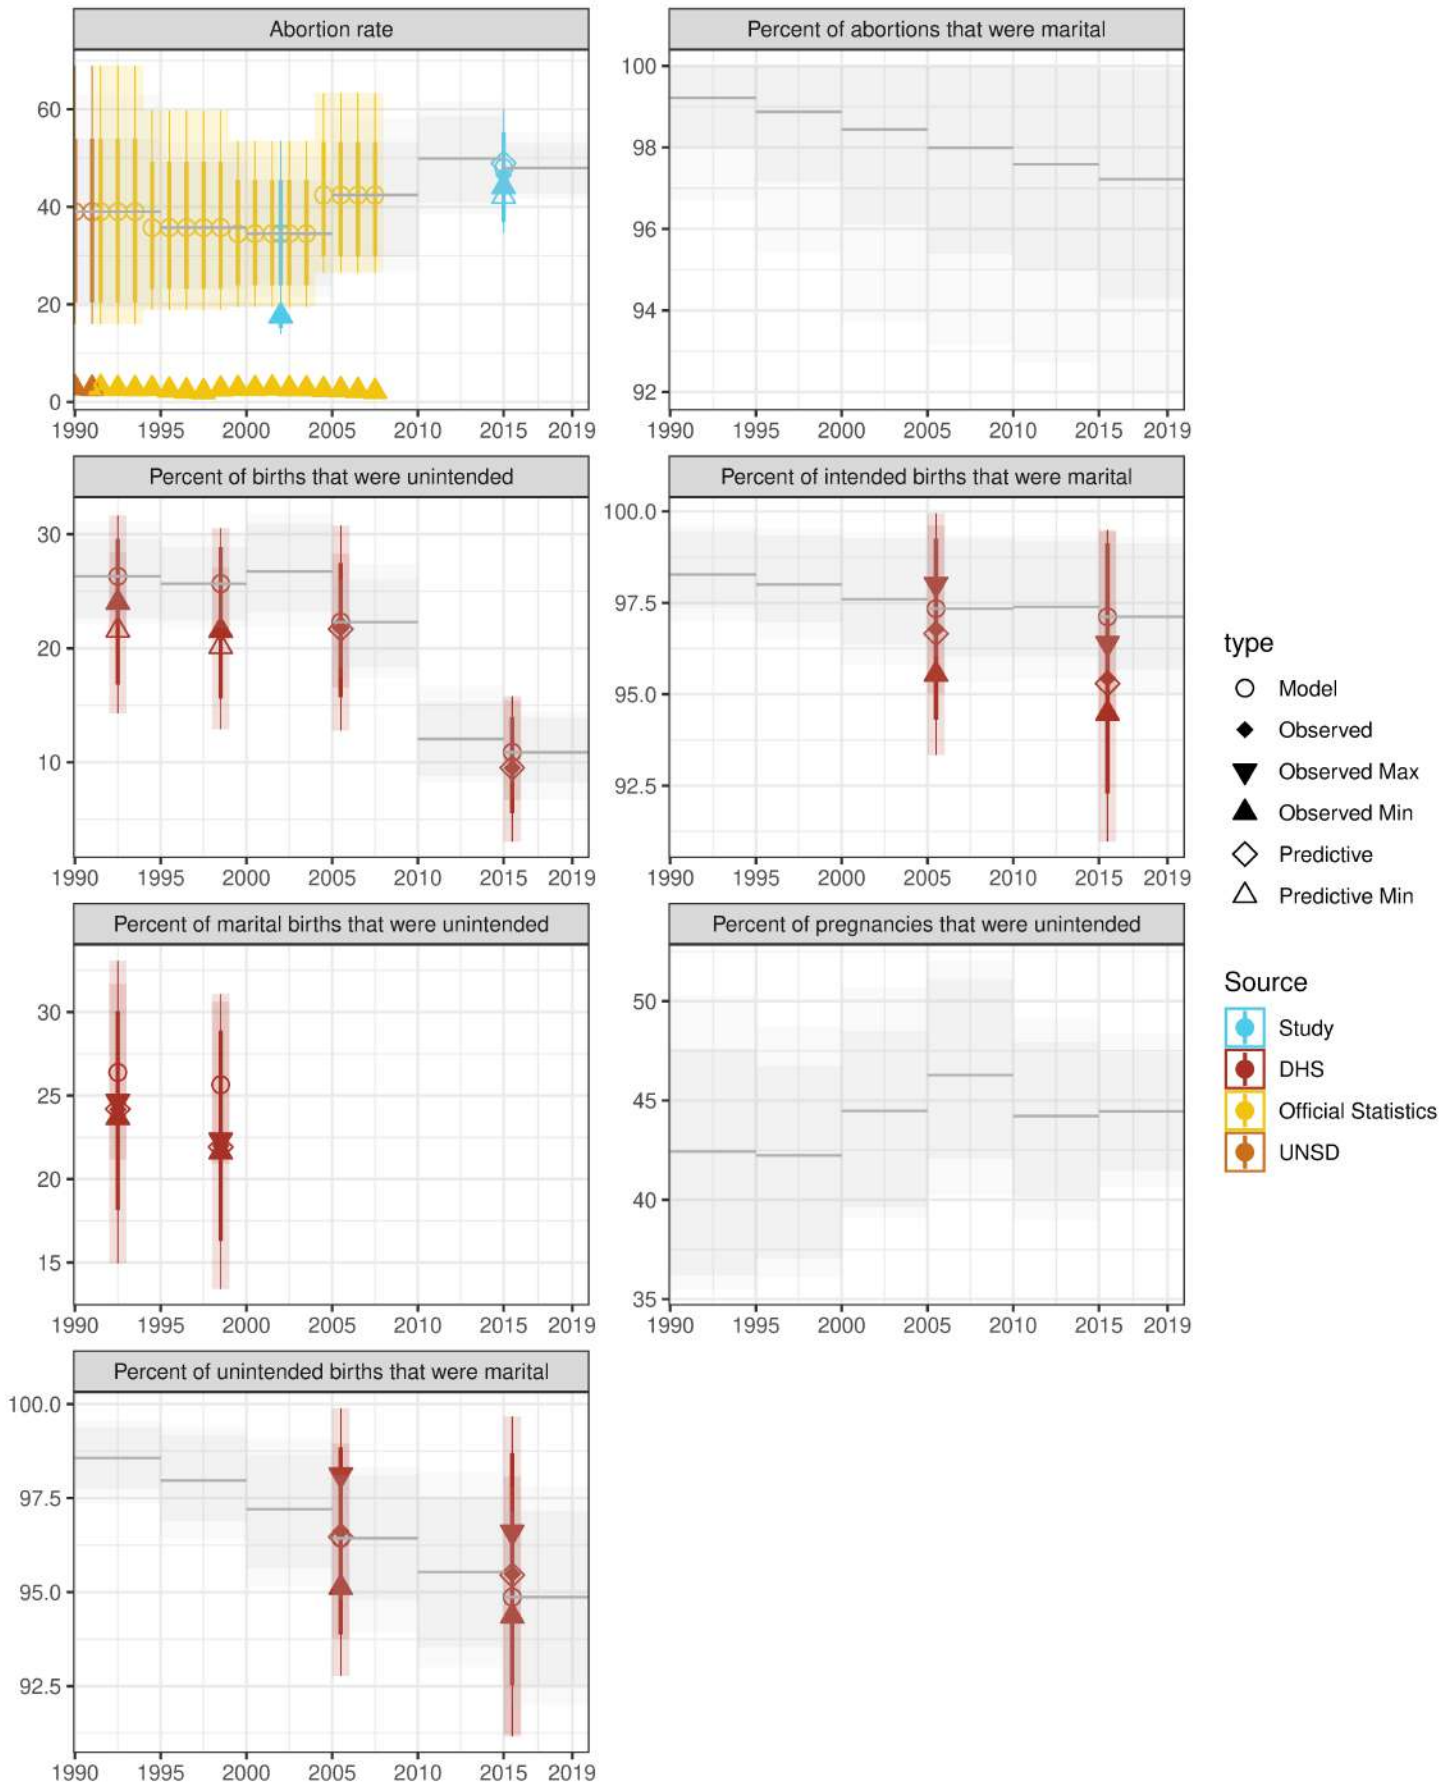

### Maldives

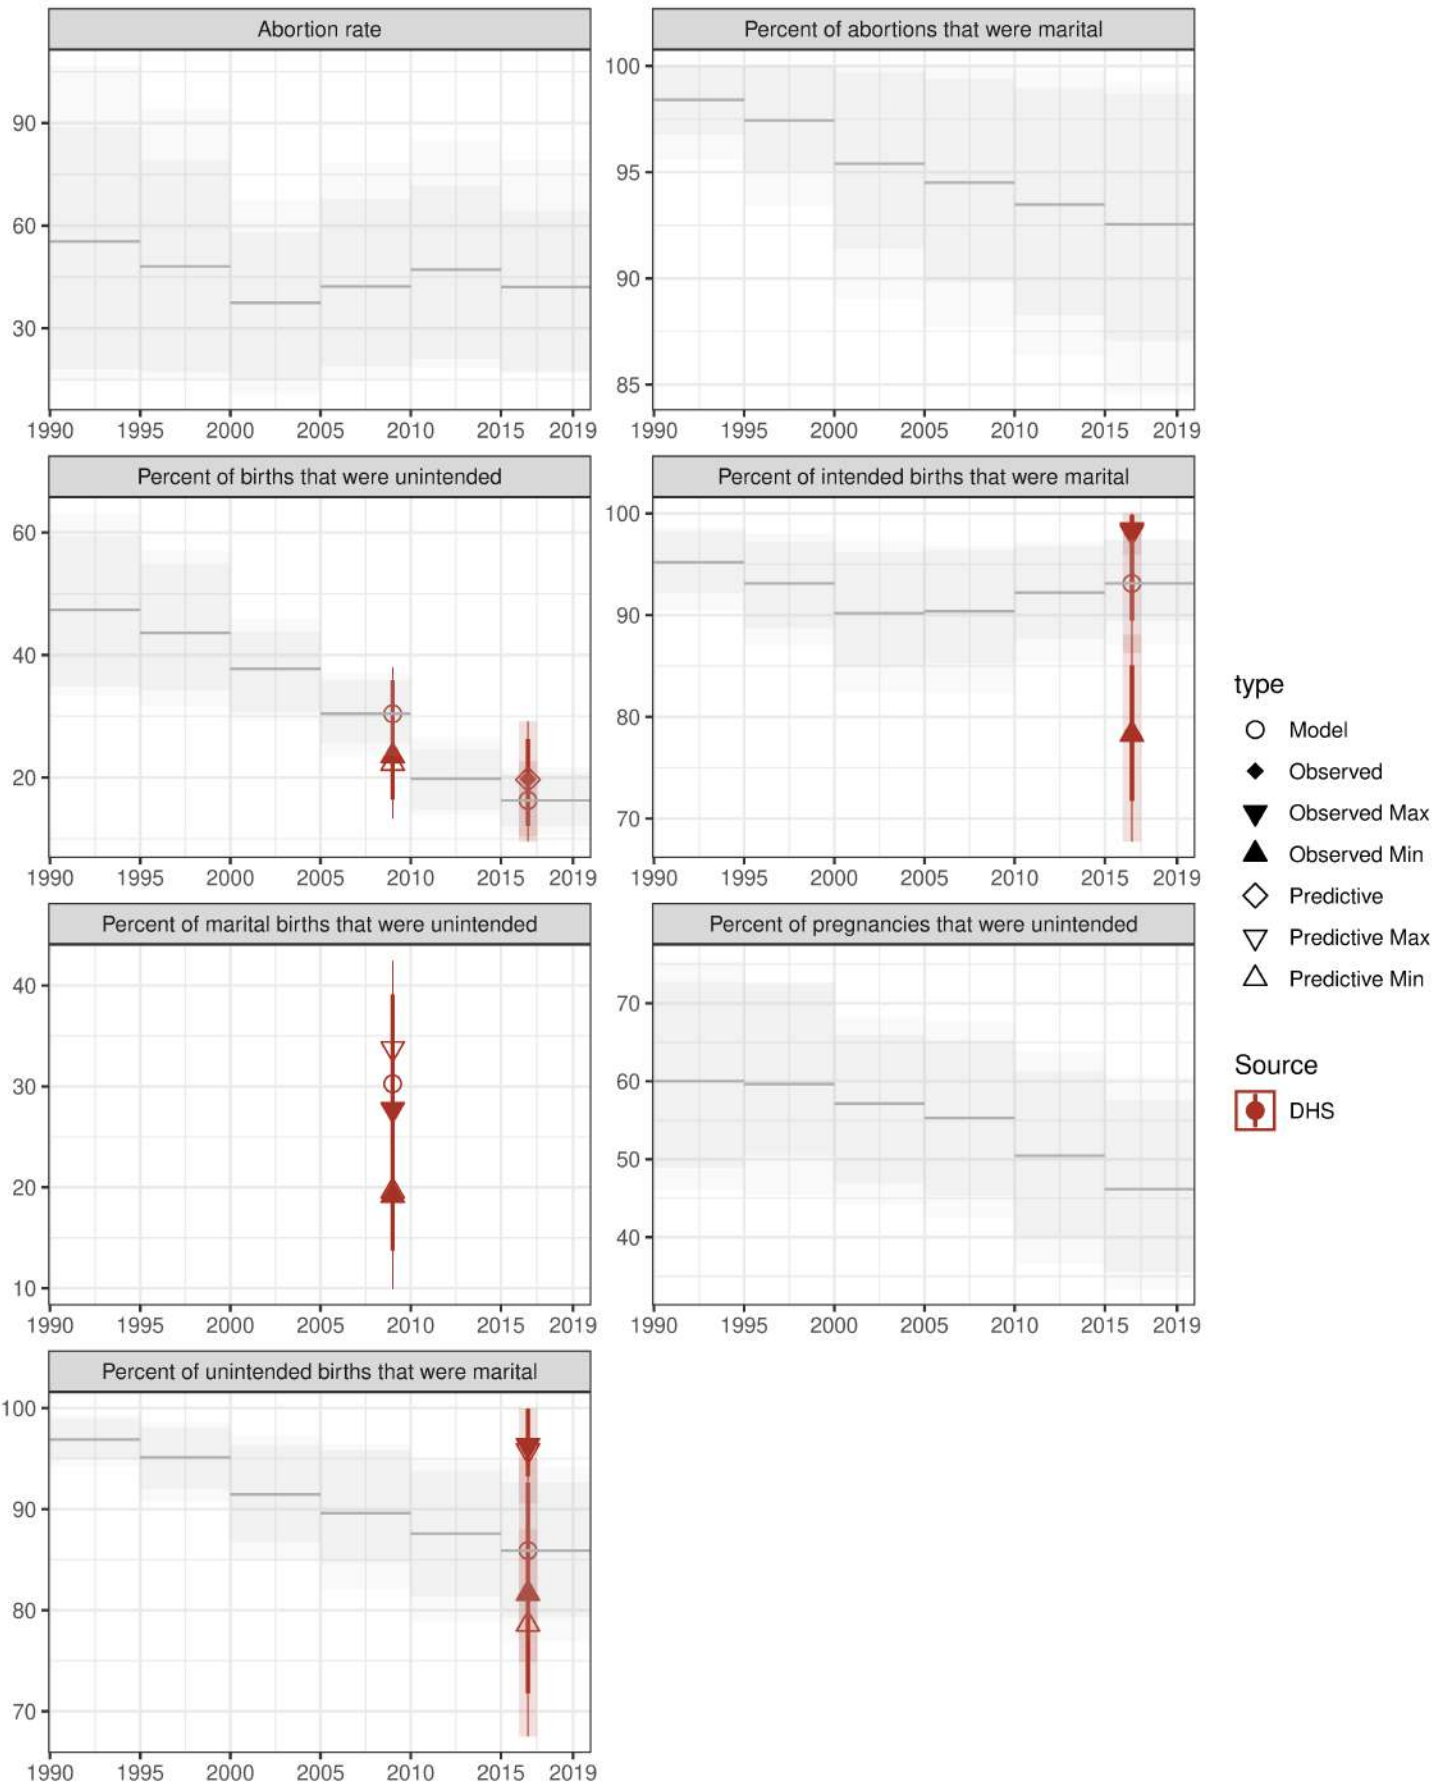

Note: Vertical lines and grey shading show 80% and 95% uncertainty intervals. Color shading shows when data were collected, if more than one year.

### Nepal

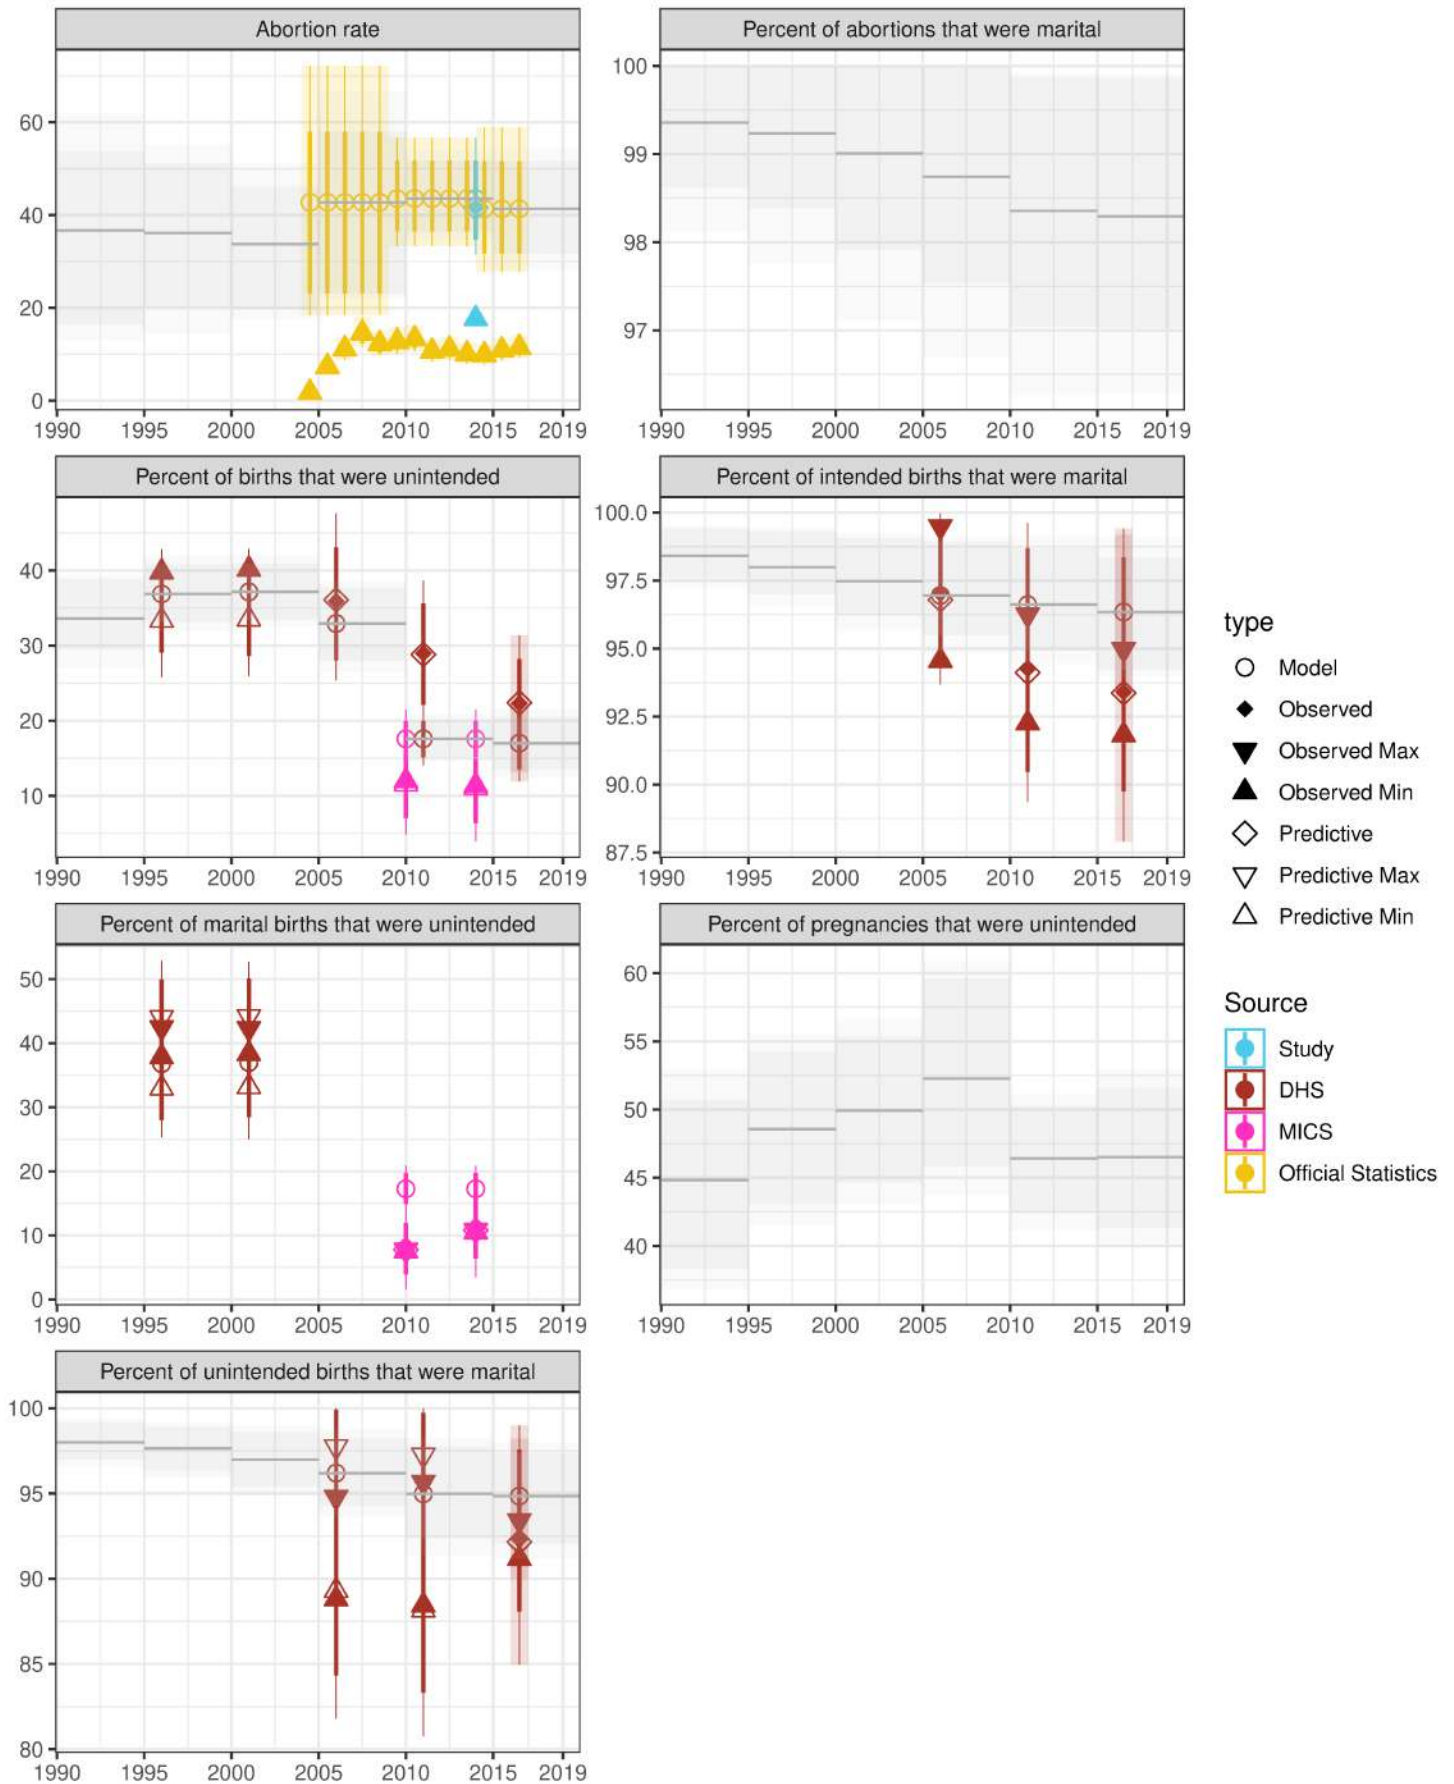

Note: Vertical lines and grey shading show 80% and 95% uncertainty intervals. Color shading shows when data were collected, if more than one year.

### Pakistan

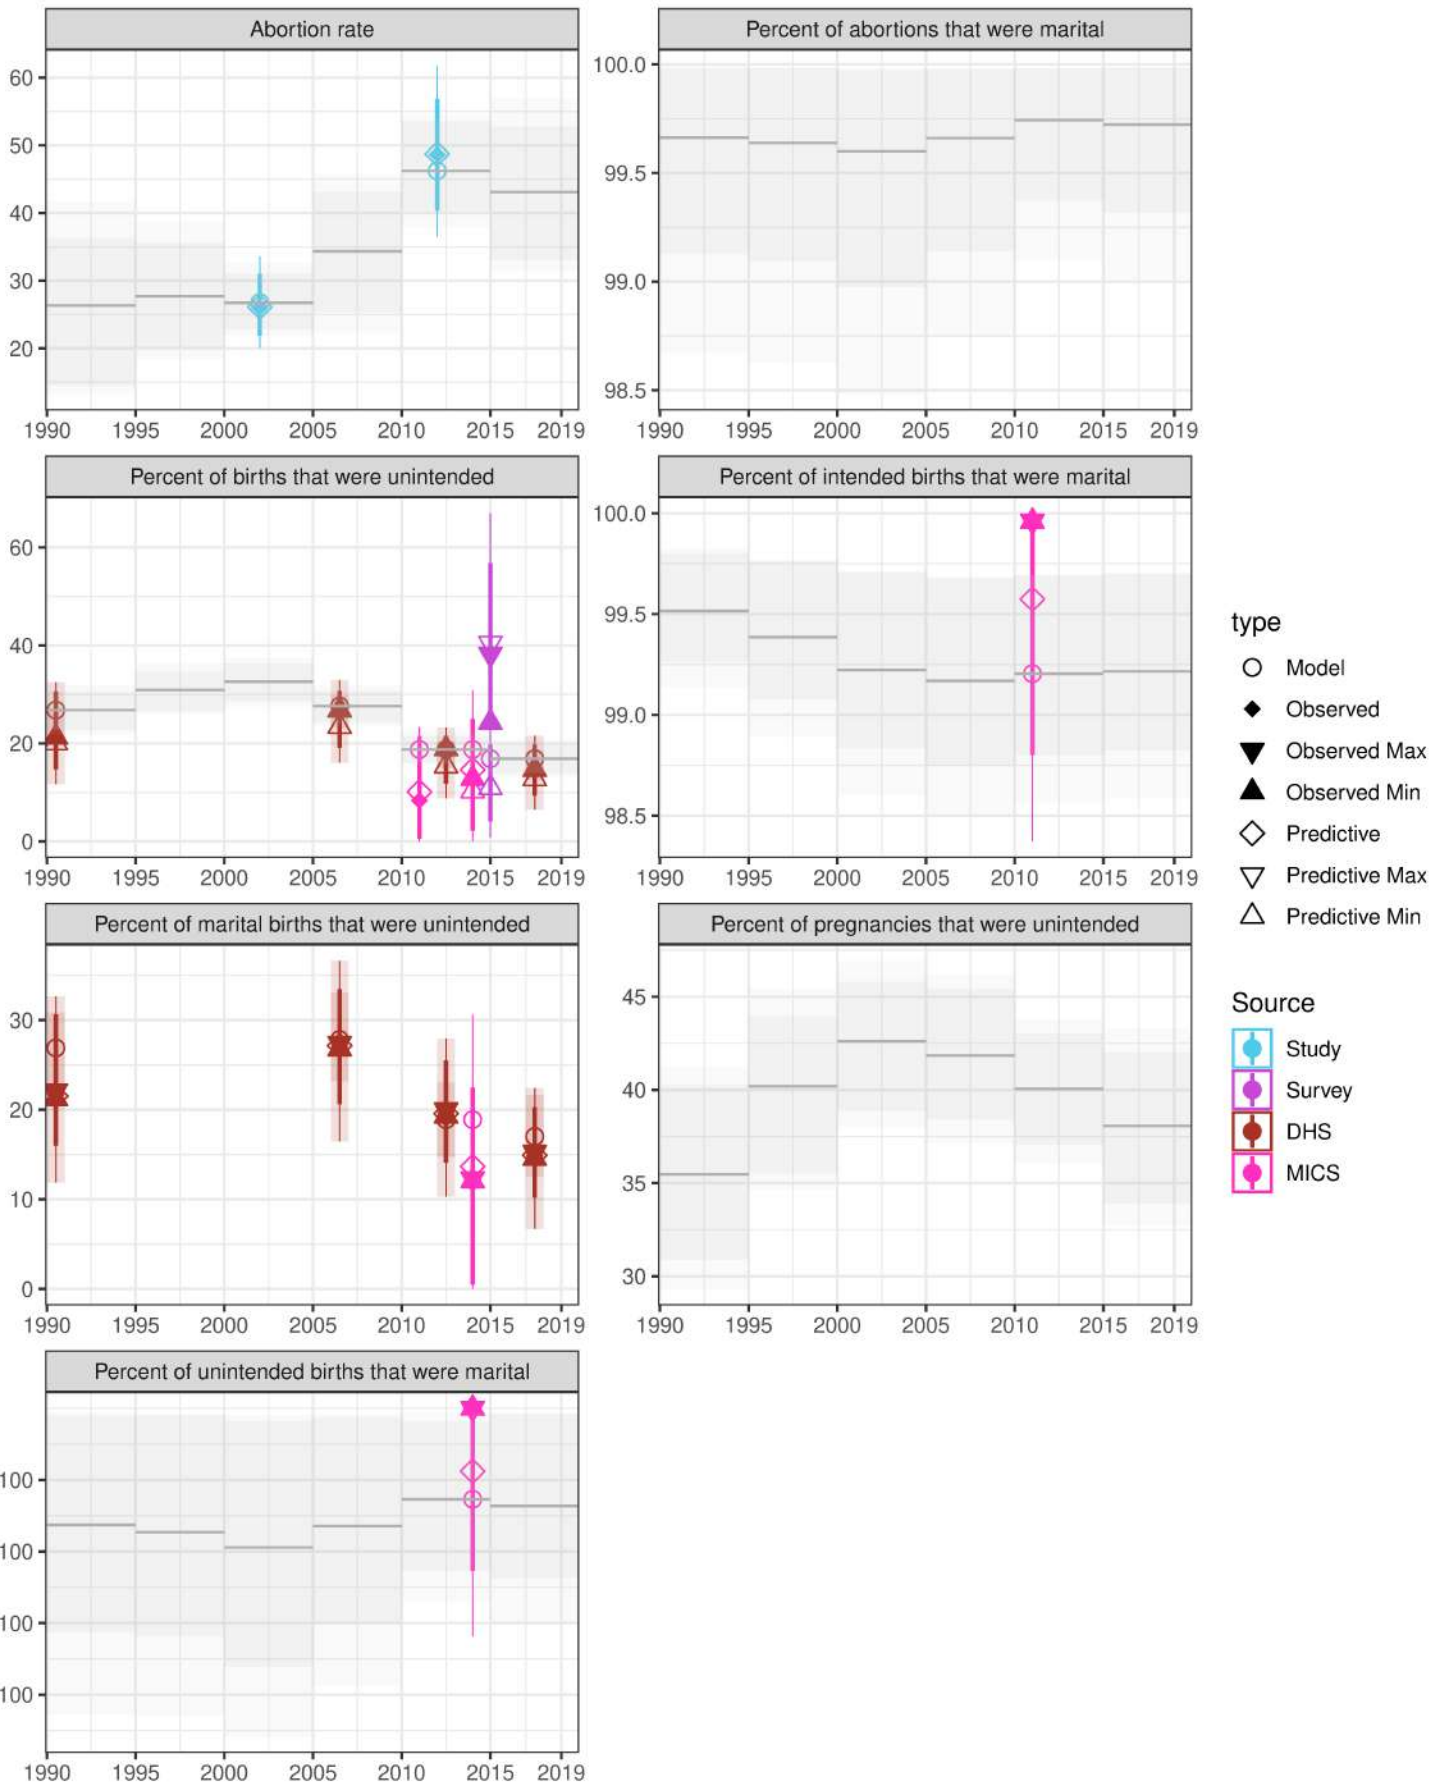

Note: Vertical lines and grey shading show 80% and 95% uncertainty intervals. Color shading shows when data were collected, if more than one year.



### Sri Lanka

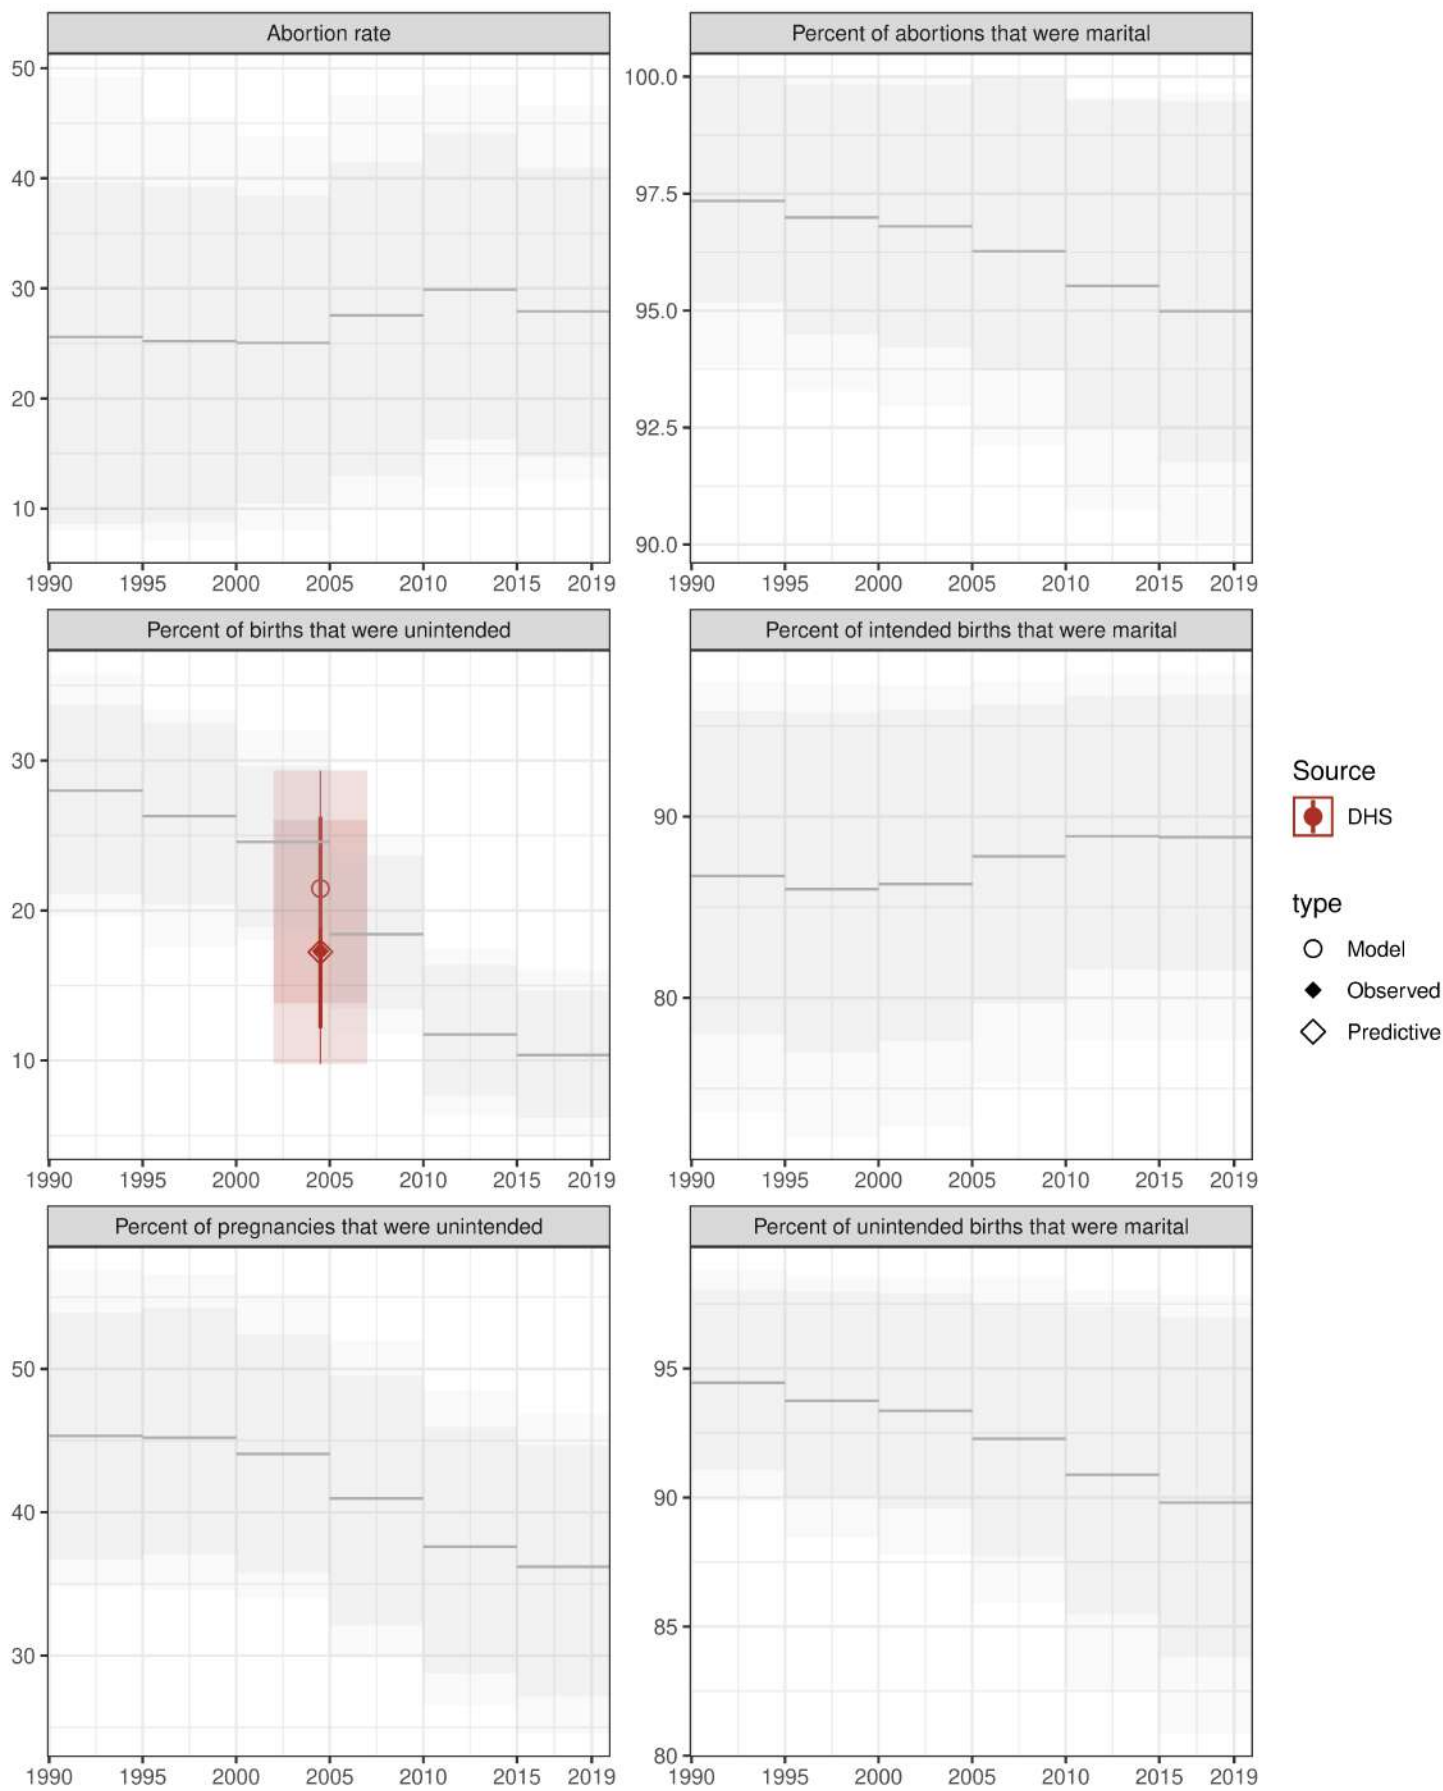

Note: Vertical lines and grey shading show 80% and 95% uncertainty intervals. Color shading shows when data were collected, if more than one year.

## **4 Eastern and Southeastern Asia**

### **4.1 Eastern Asia**

### China

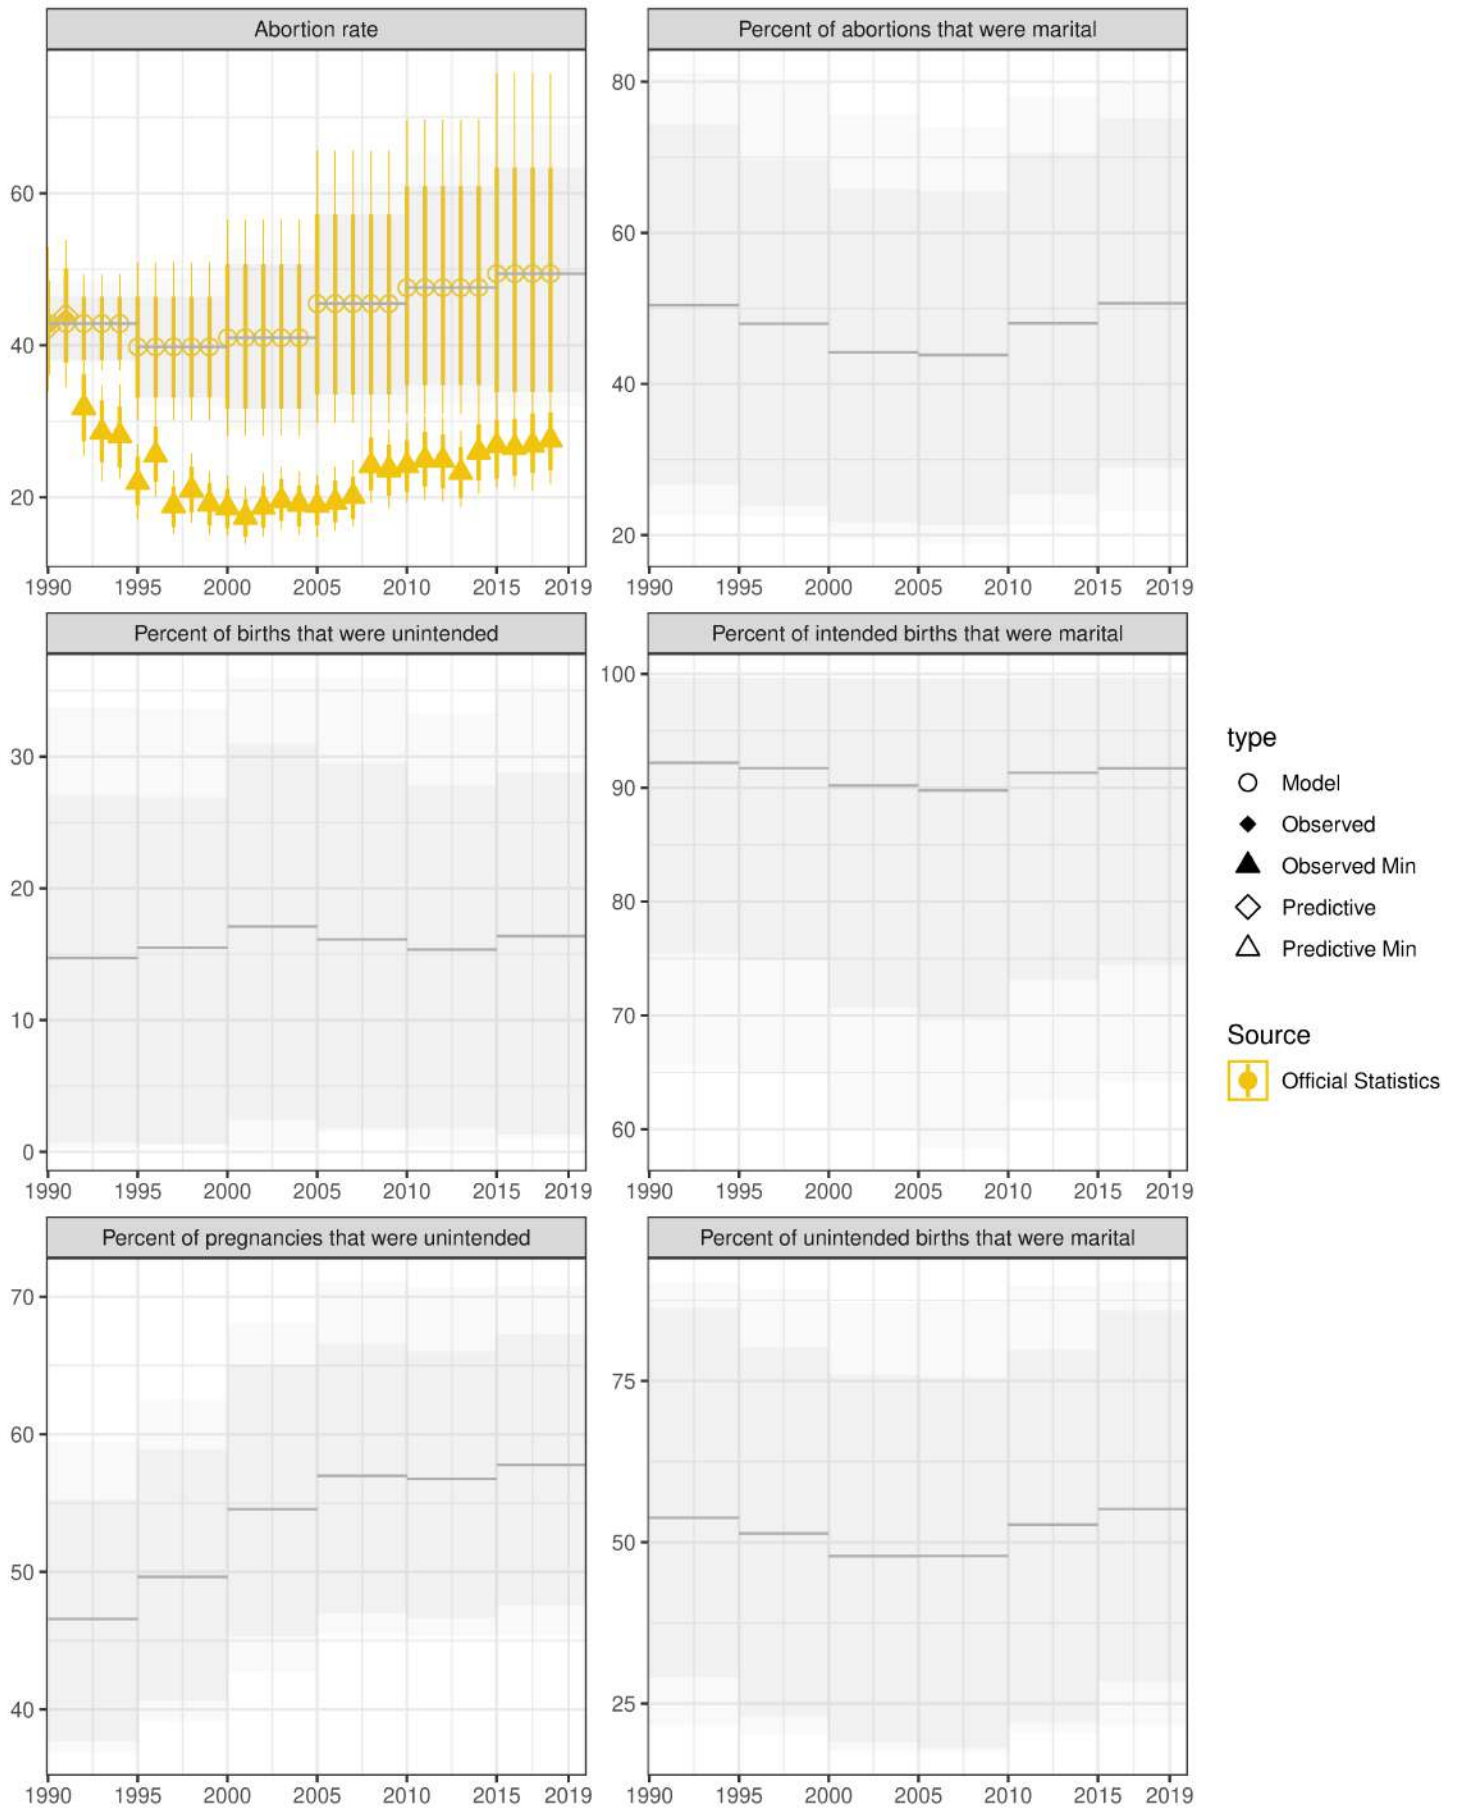

Note: Vertical lines and grey shading show 80% and 95% uncertainty intervals.

### Hong Kong

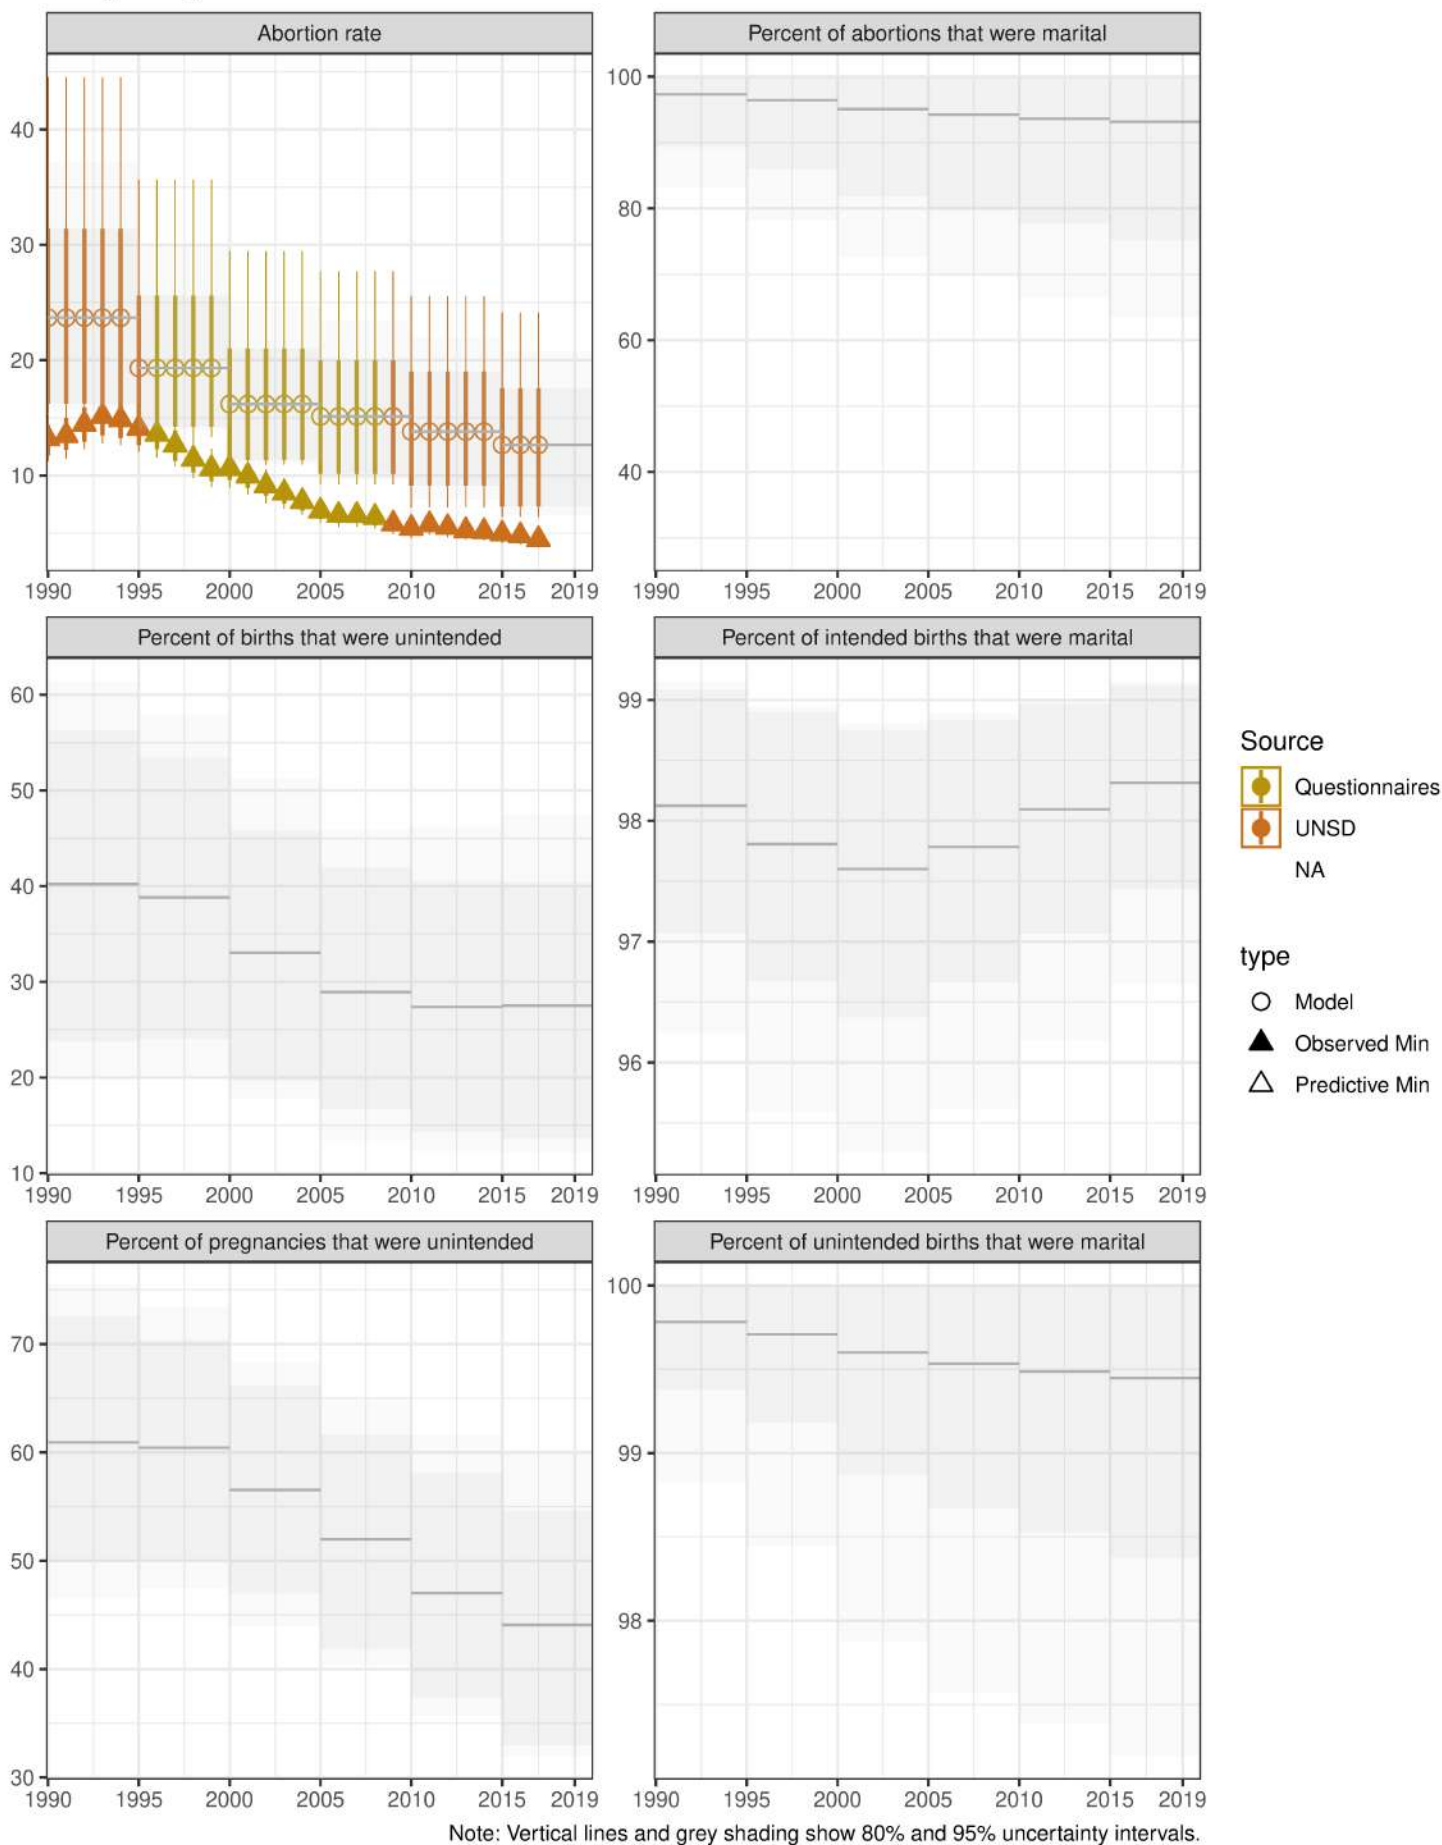

Japan

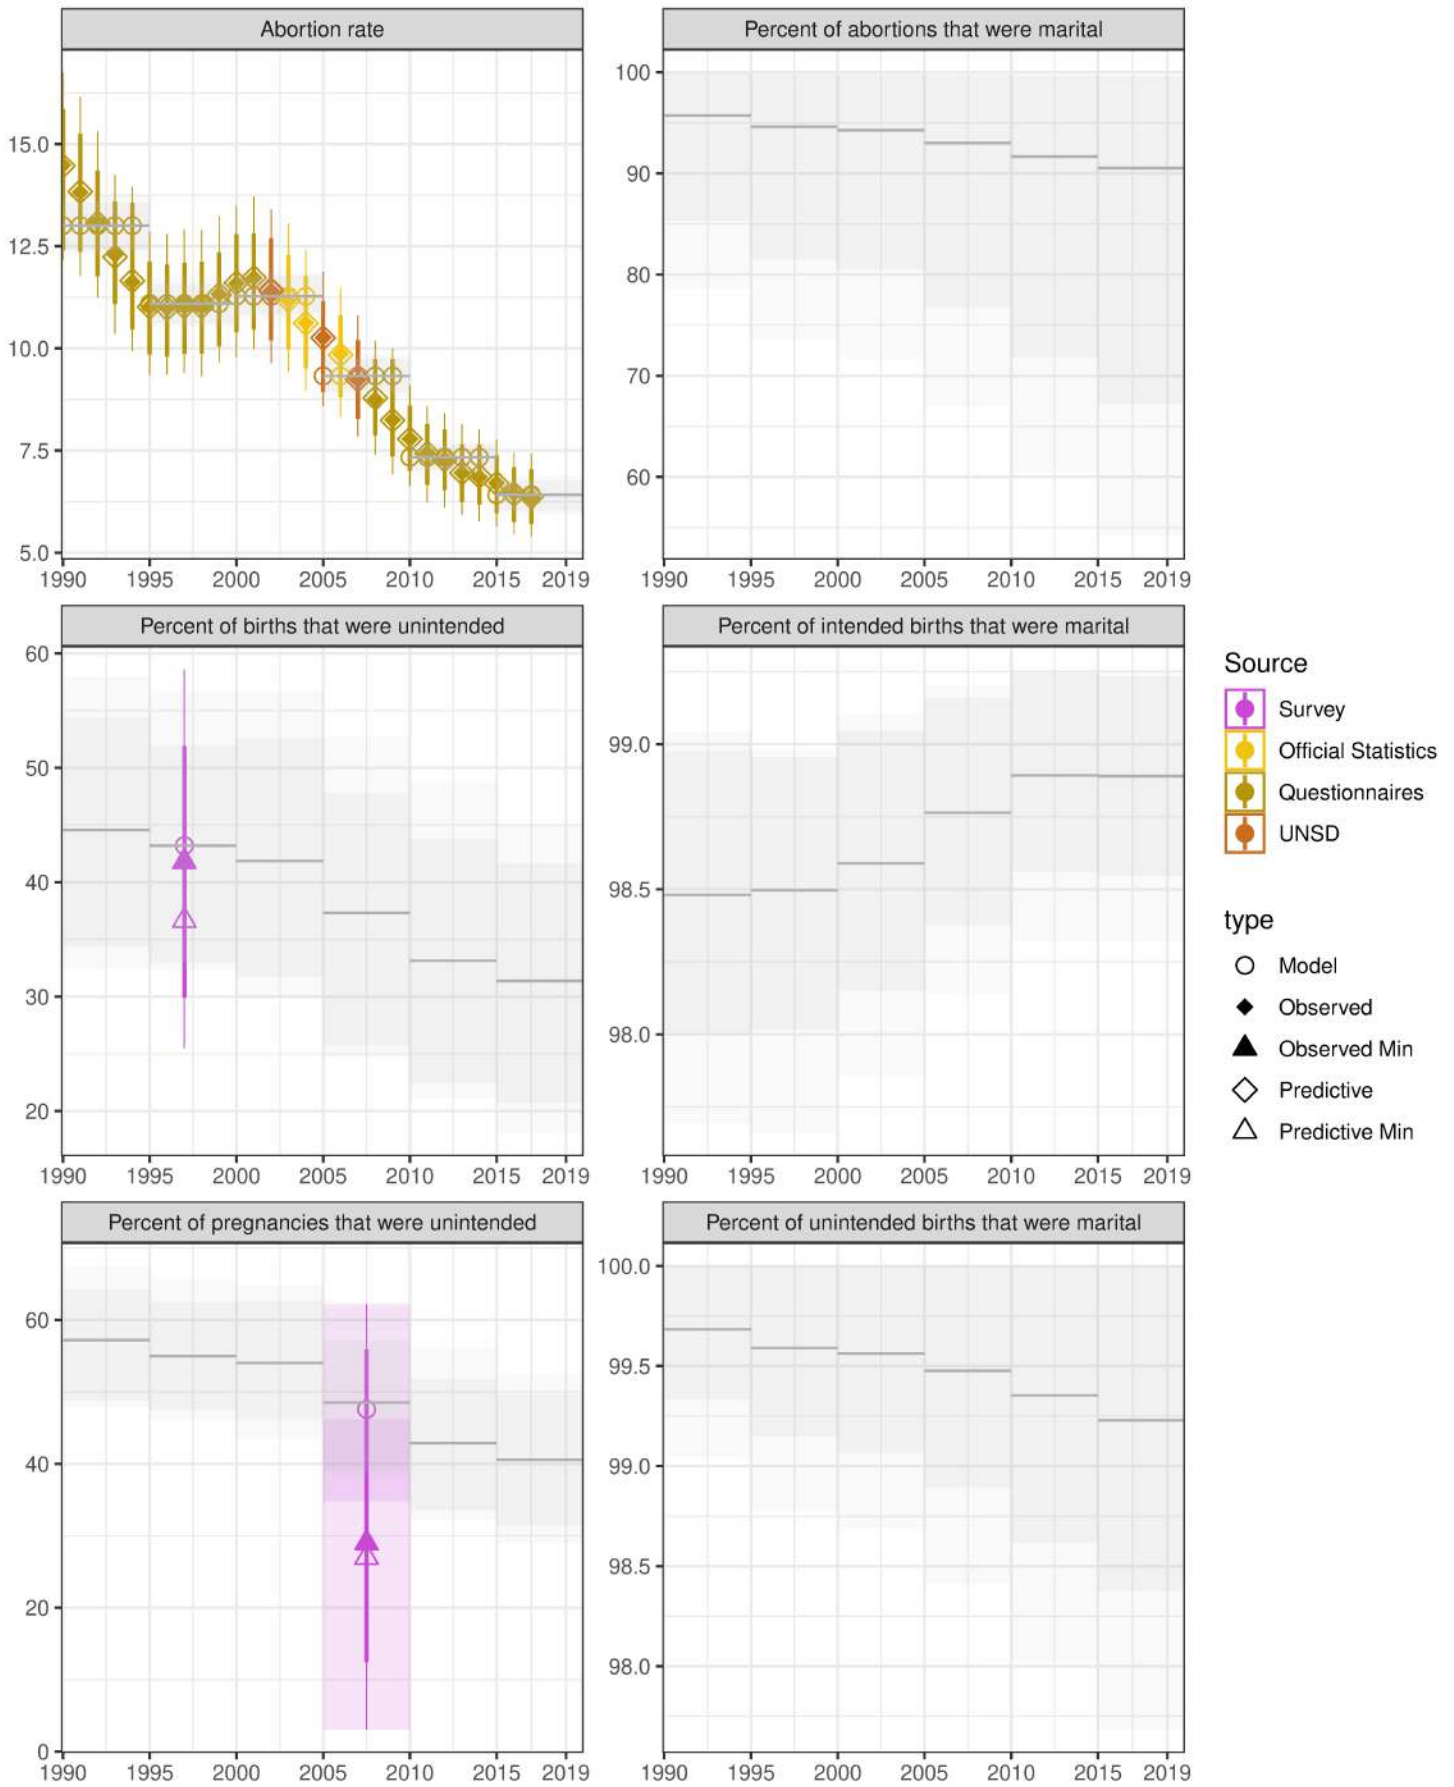

Note: Vertical lines and grey shading show 80% and 95% uncertainty intervals. Color shading shows when data were collected, if more than one year.

### Mongolia

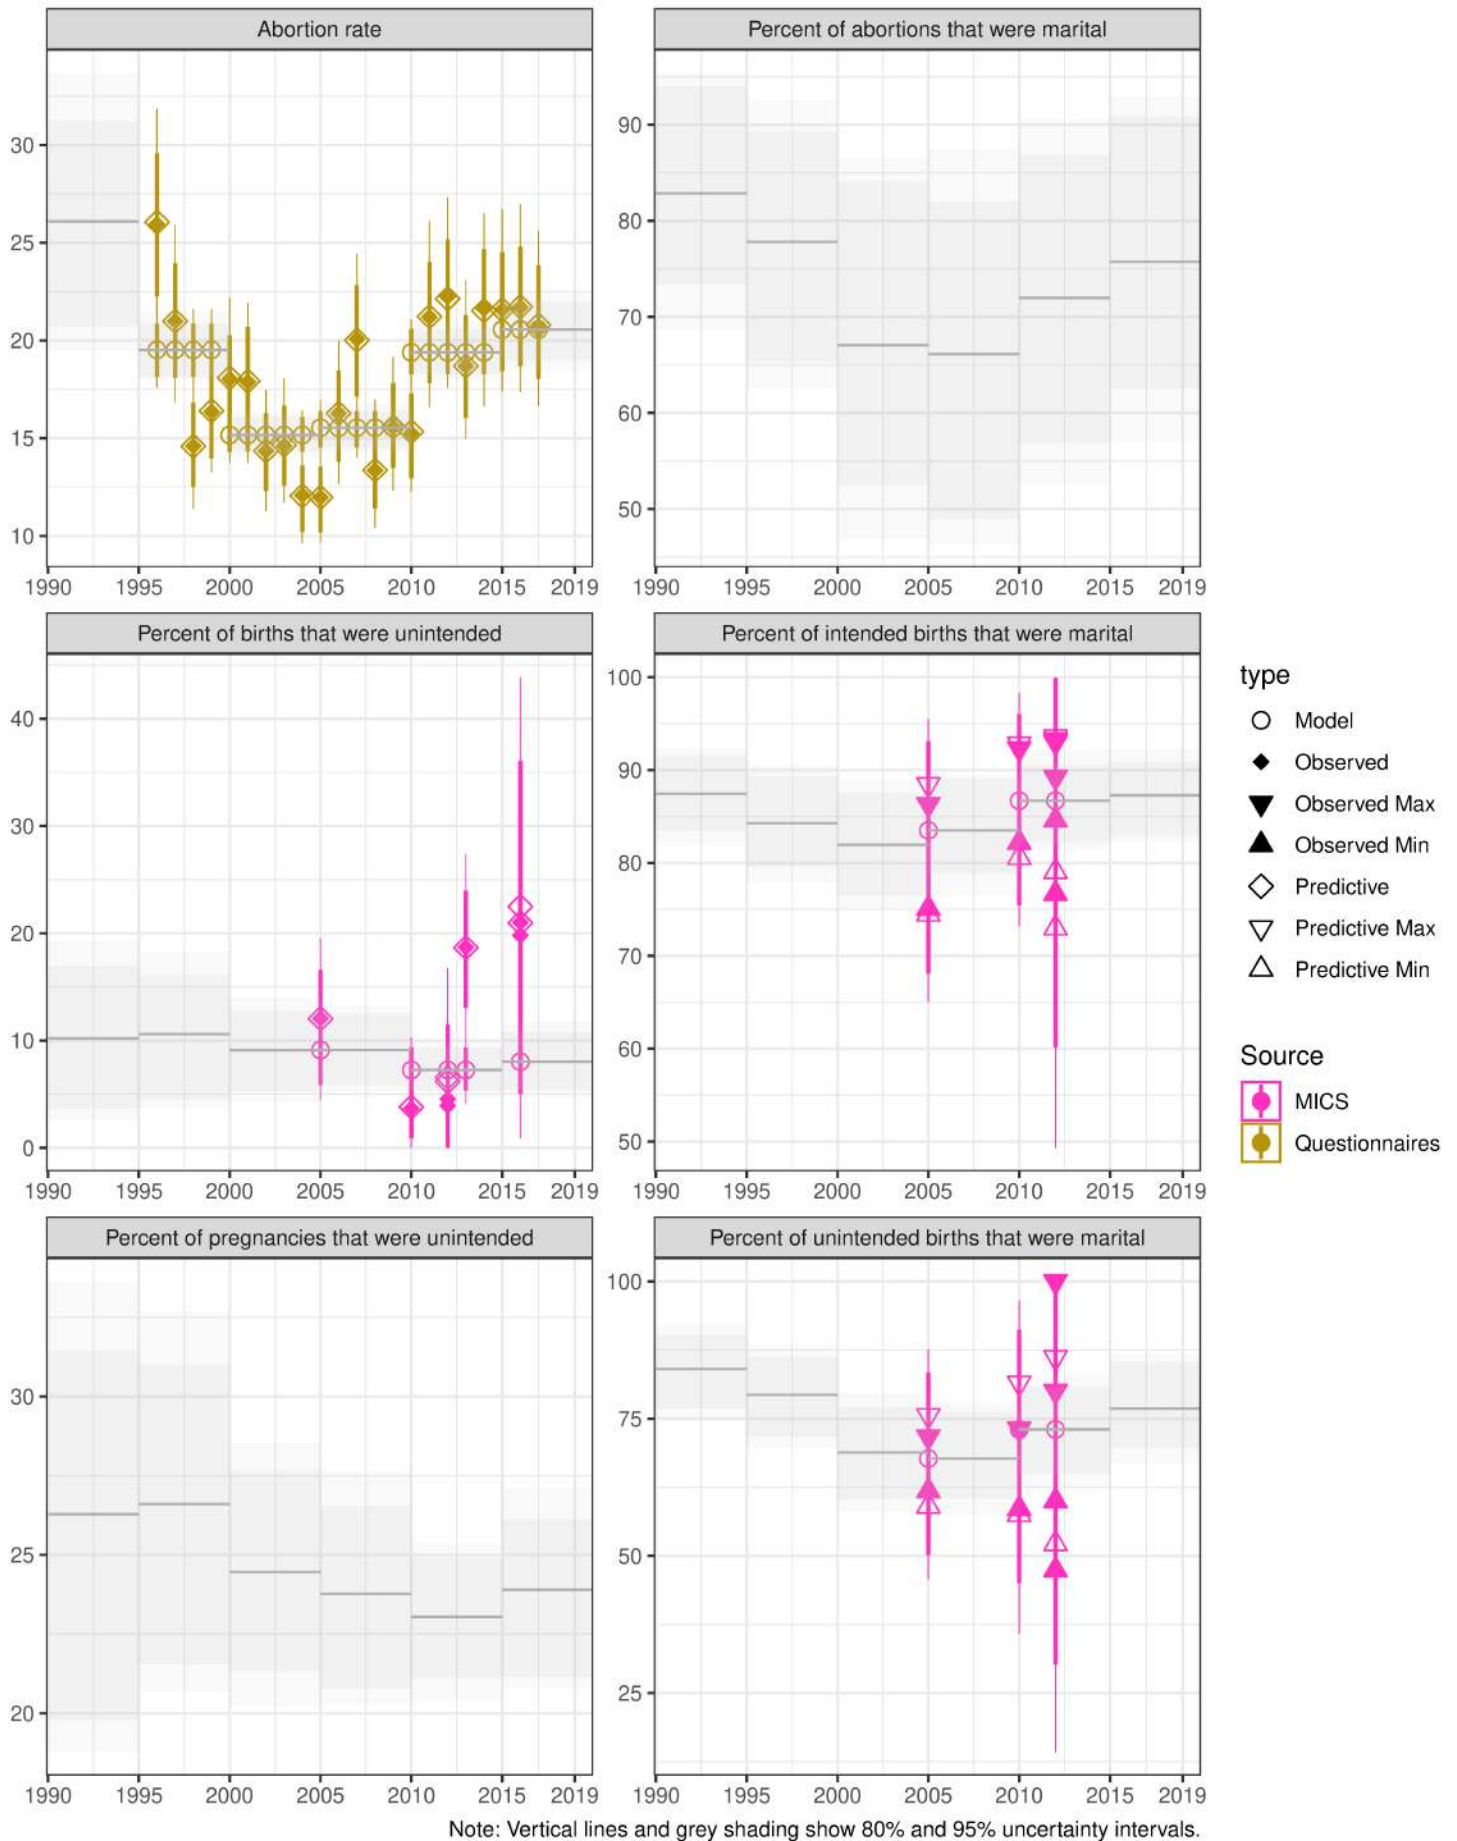

Note: Vertical lines and grey shading show 80% and 95% uncertainty intervals.

### South Korea

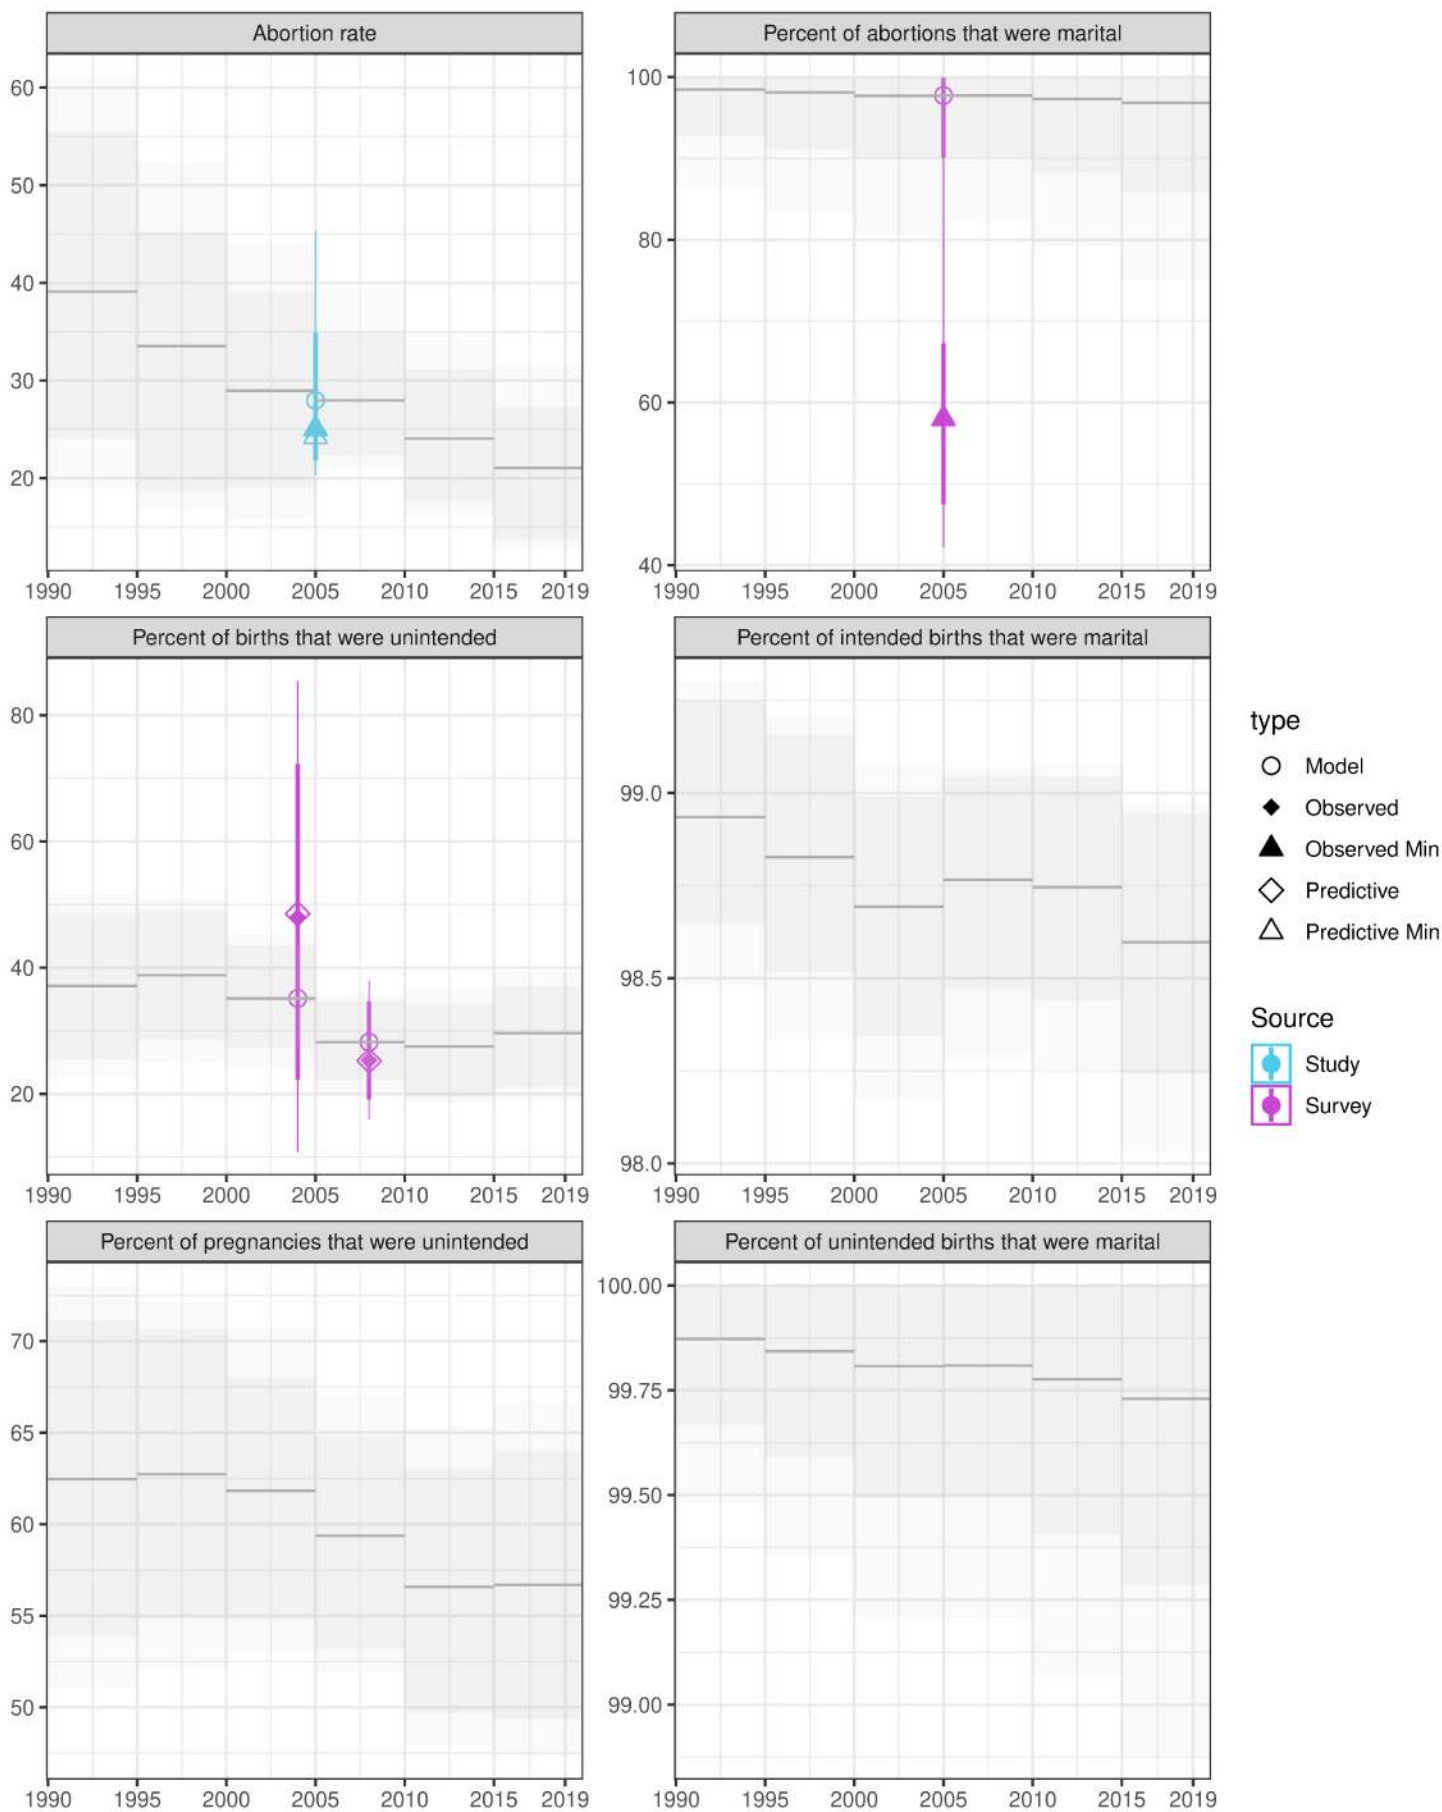

Note: Vertical lines and grey shading show 80% and 95% uncertainty intervals.

## 4.2 South-Eastern Asia



### Cambodia

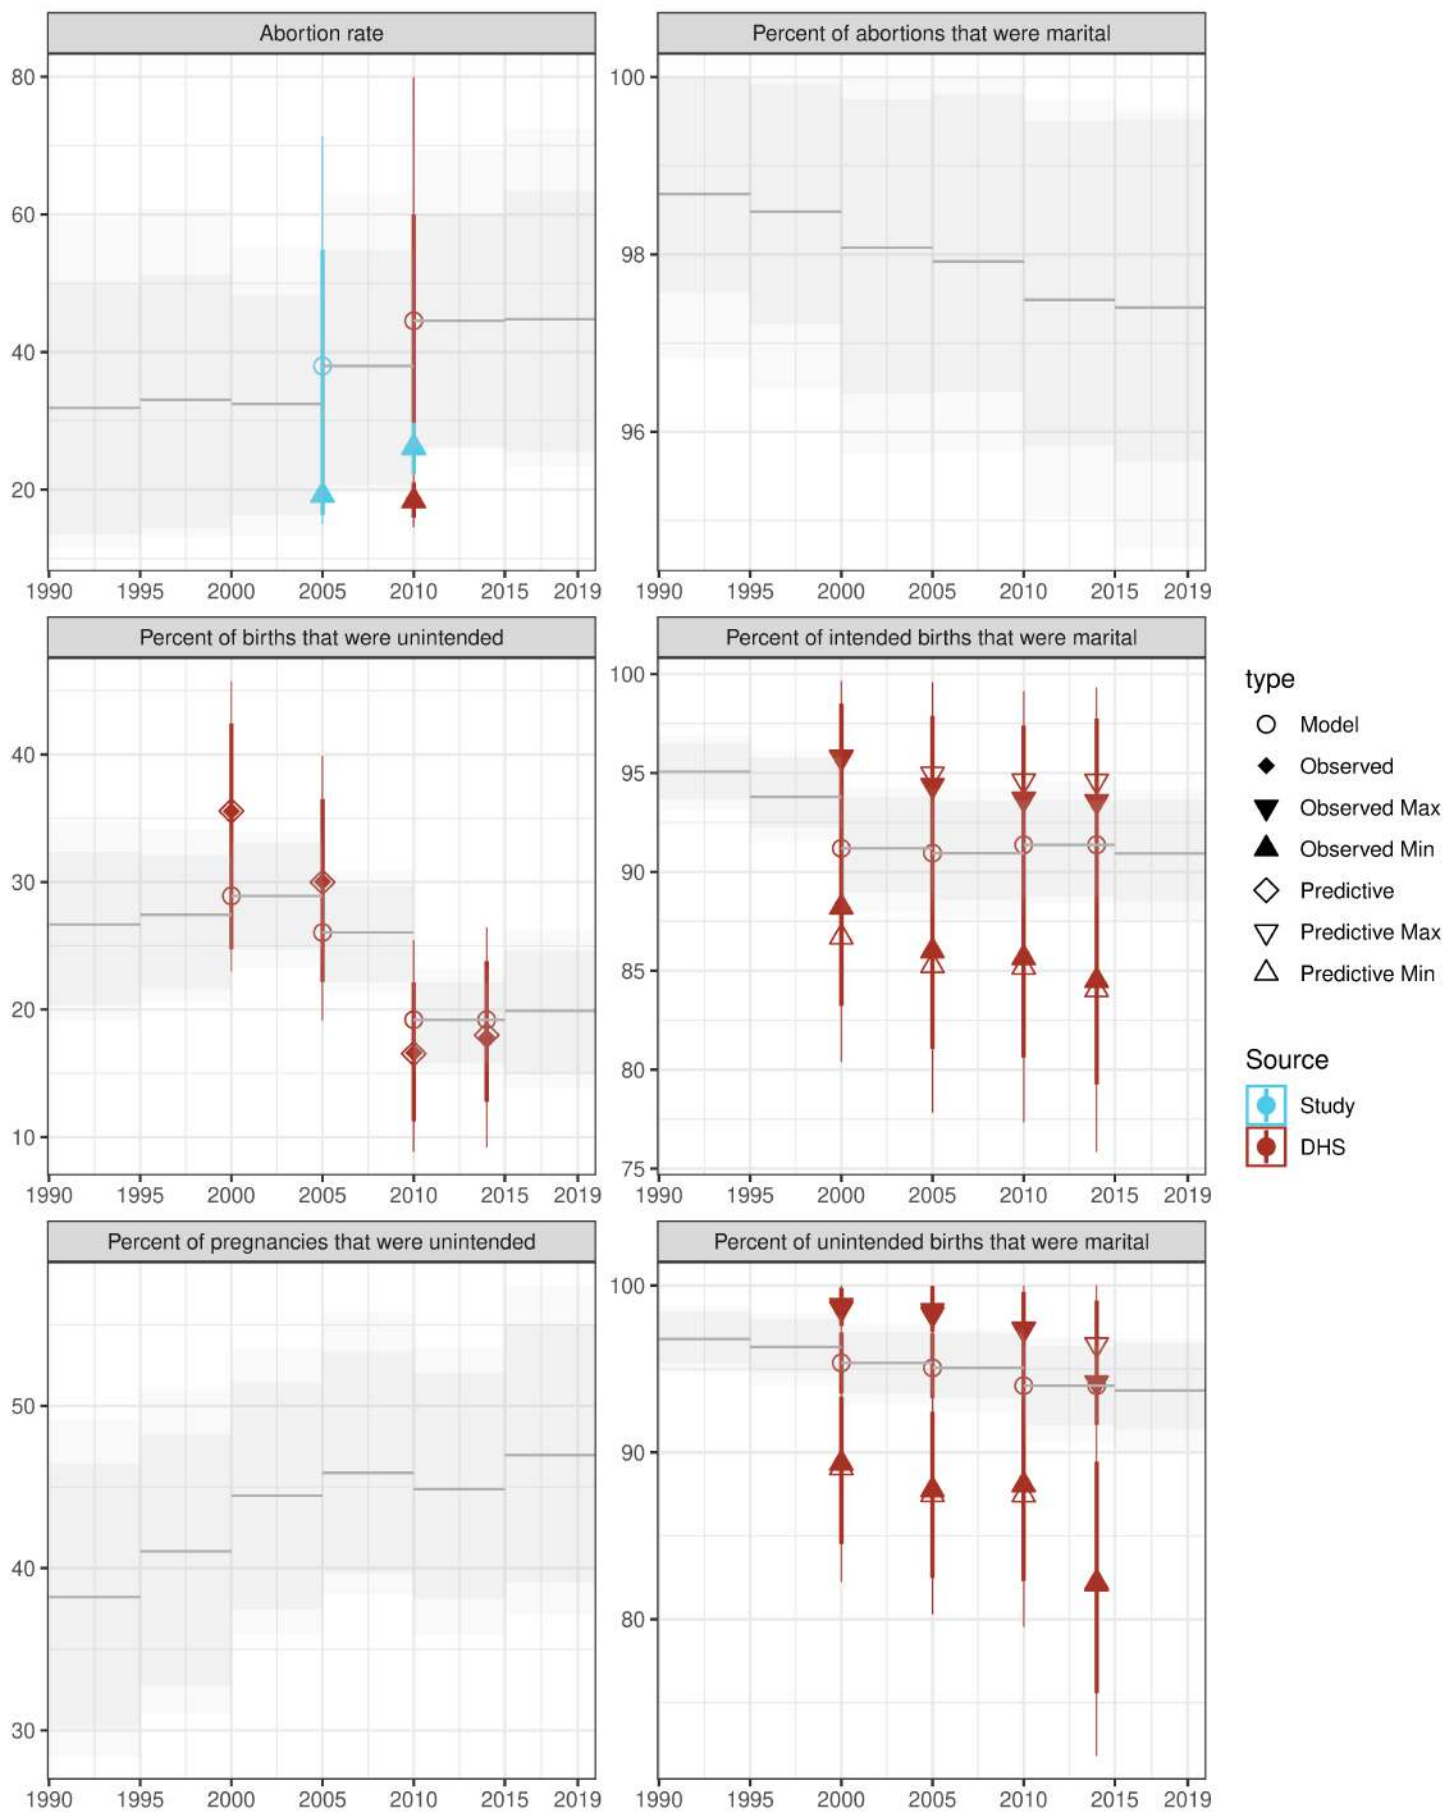

Note: Vertical lines and grey shading show 80% and 95% uncertainty intervals.

### Indonesia

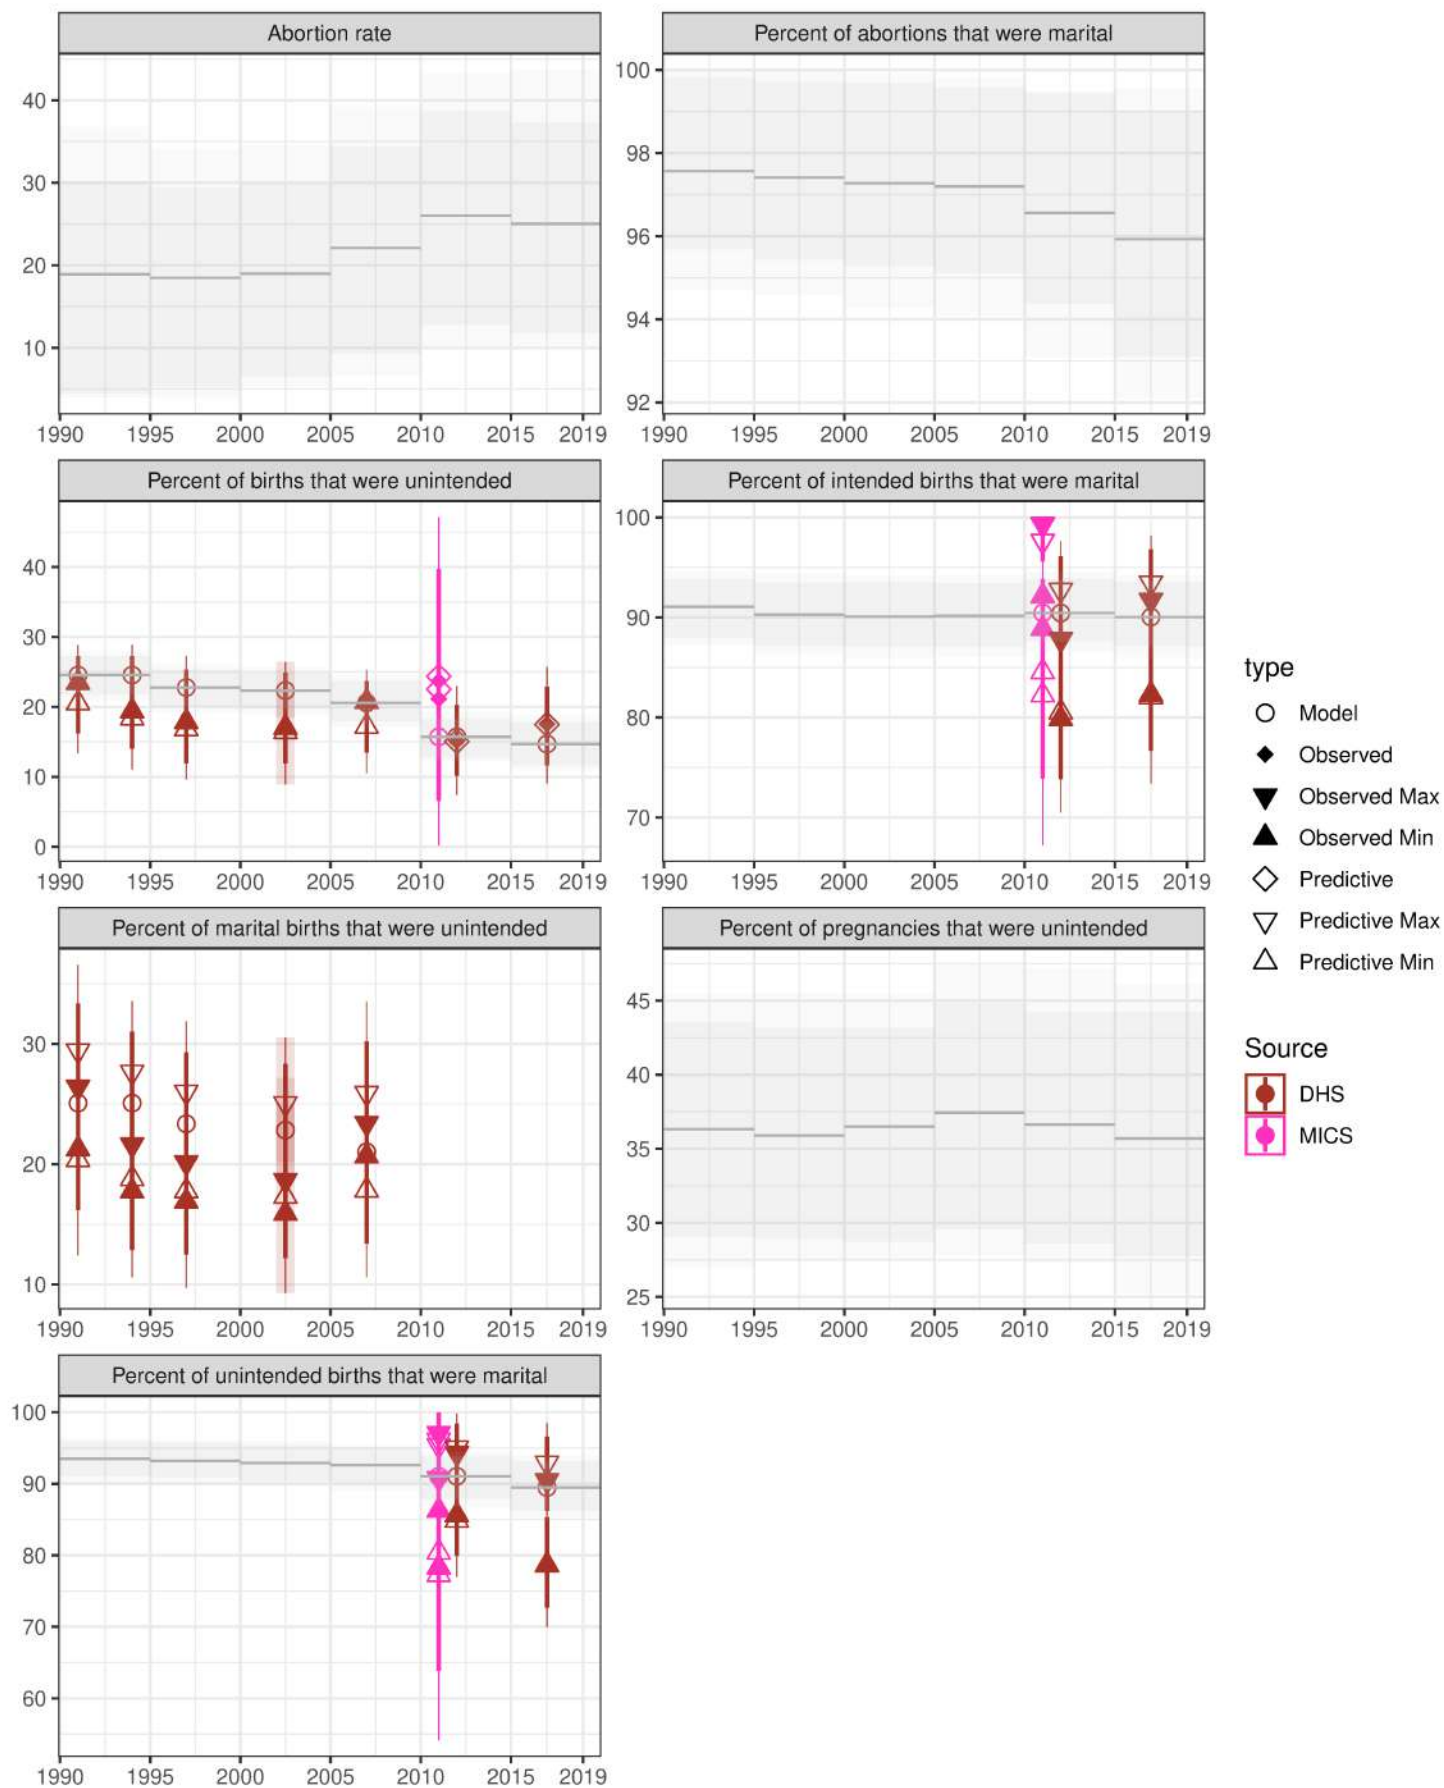

Note: Vertical lines and grey shading show 80% and 95% uncertainty intervals. Color shading shows when data were collected, if more than one year.

### Laos

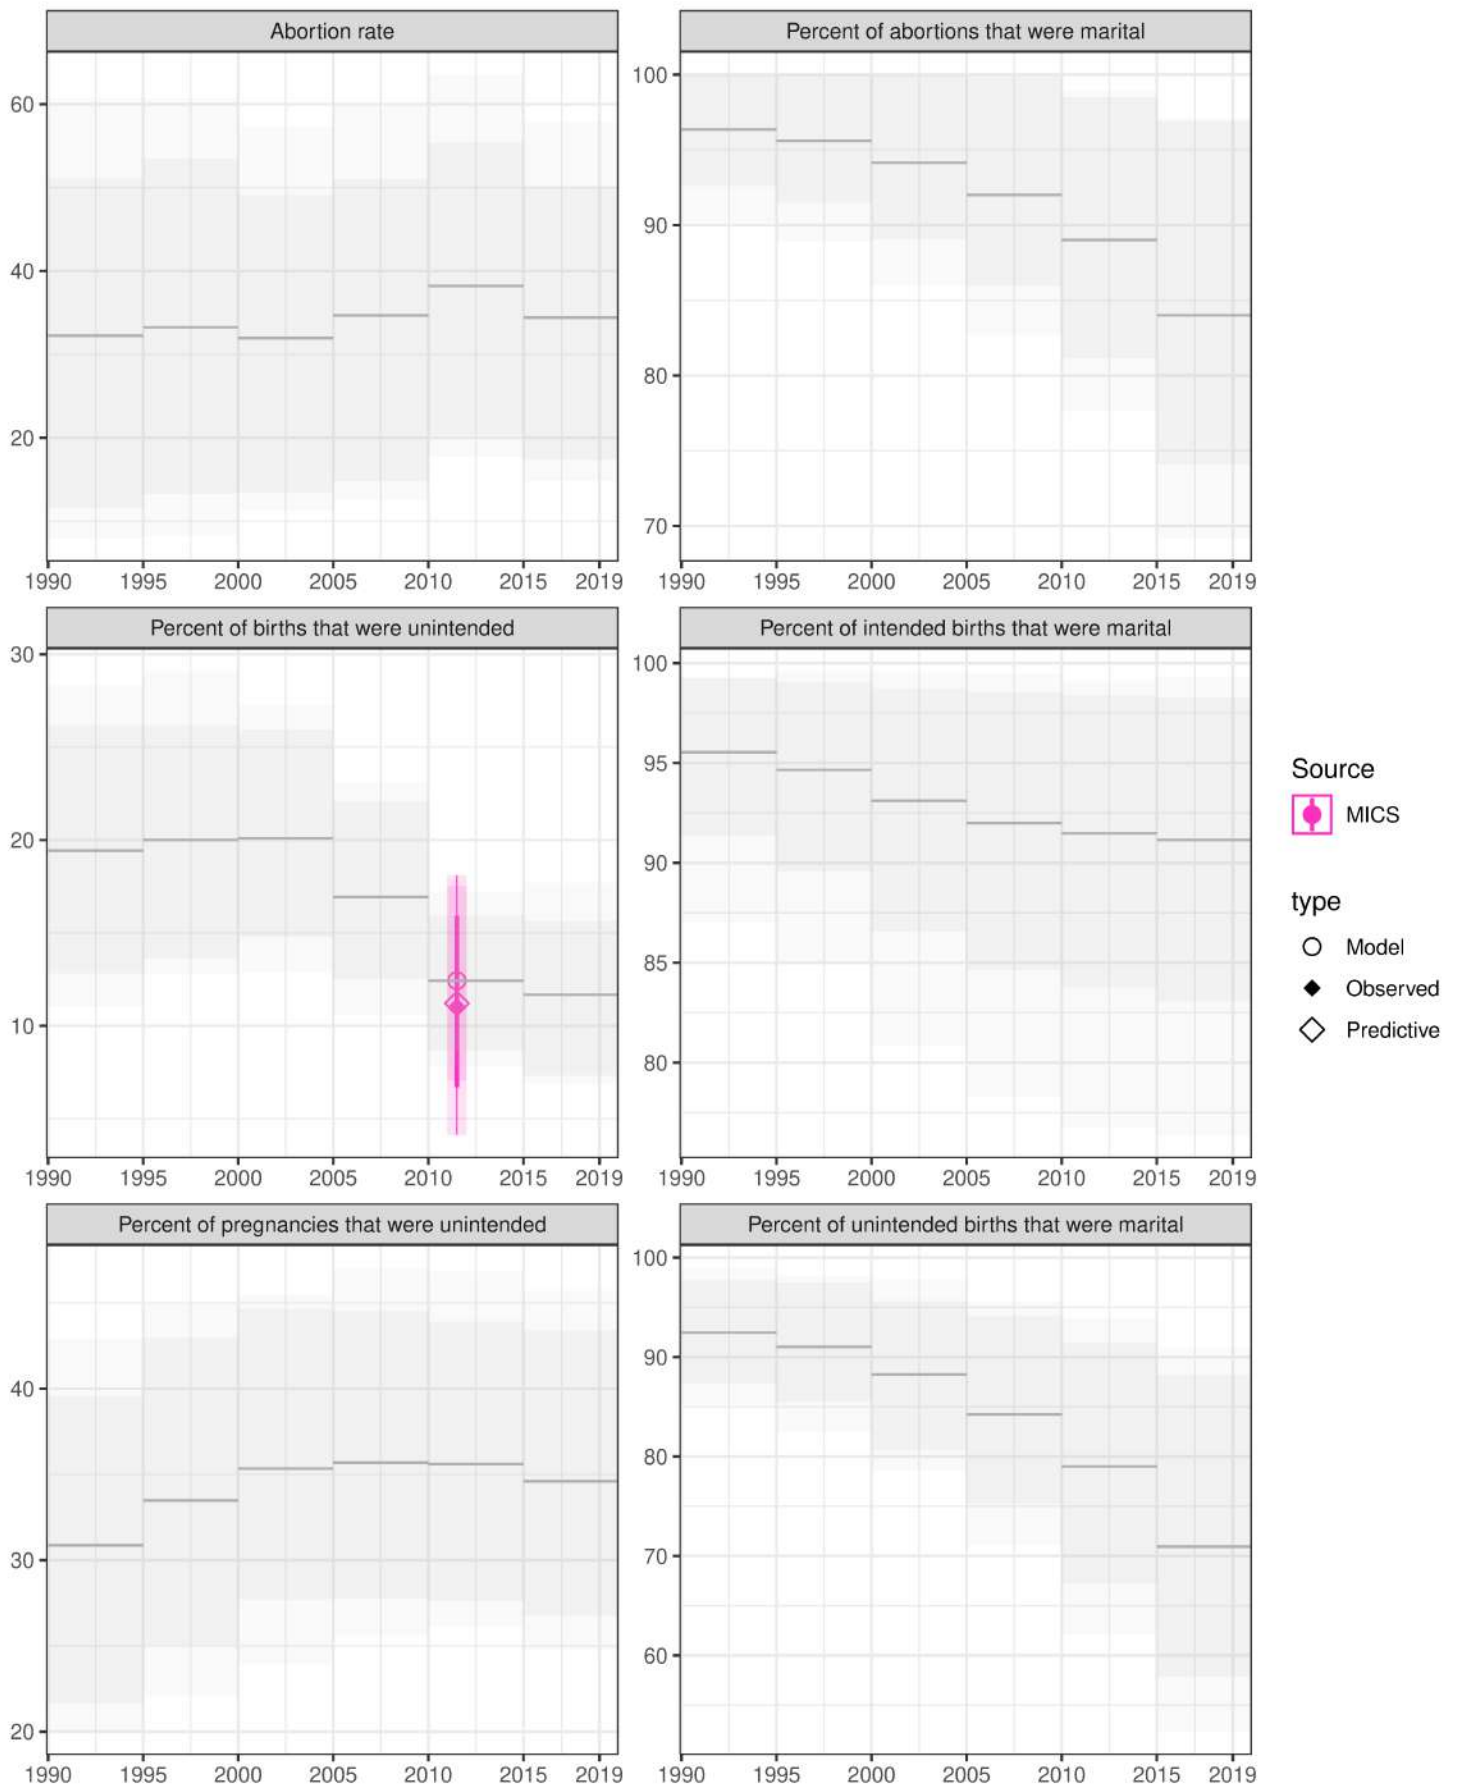

Note: Vertical lines and grey shading show 80% and 95% uncertainty intervals. Color shading shows when data were collected, if more than one year.

### Myanmar

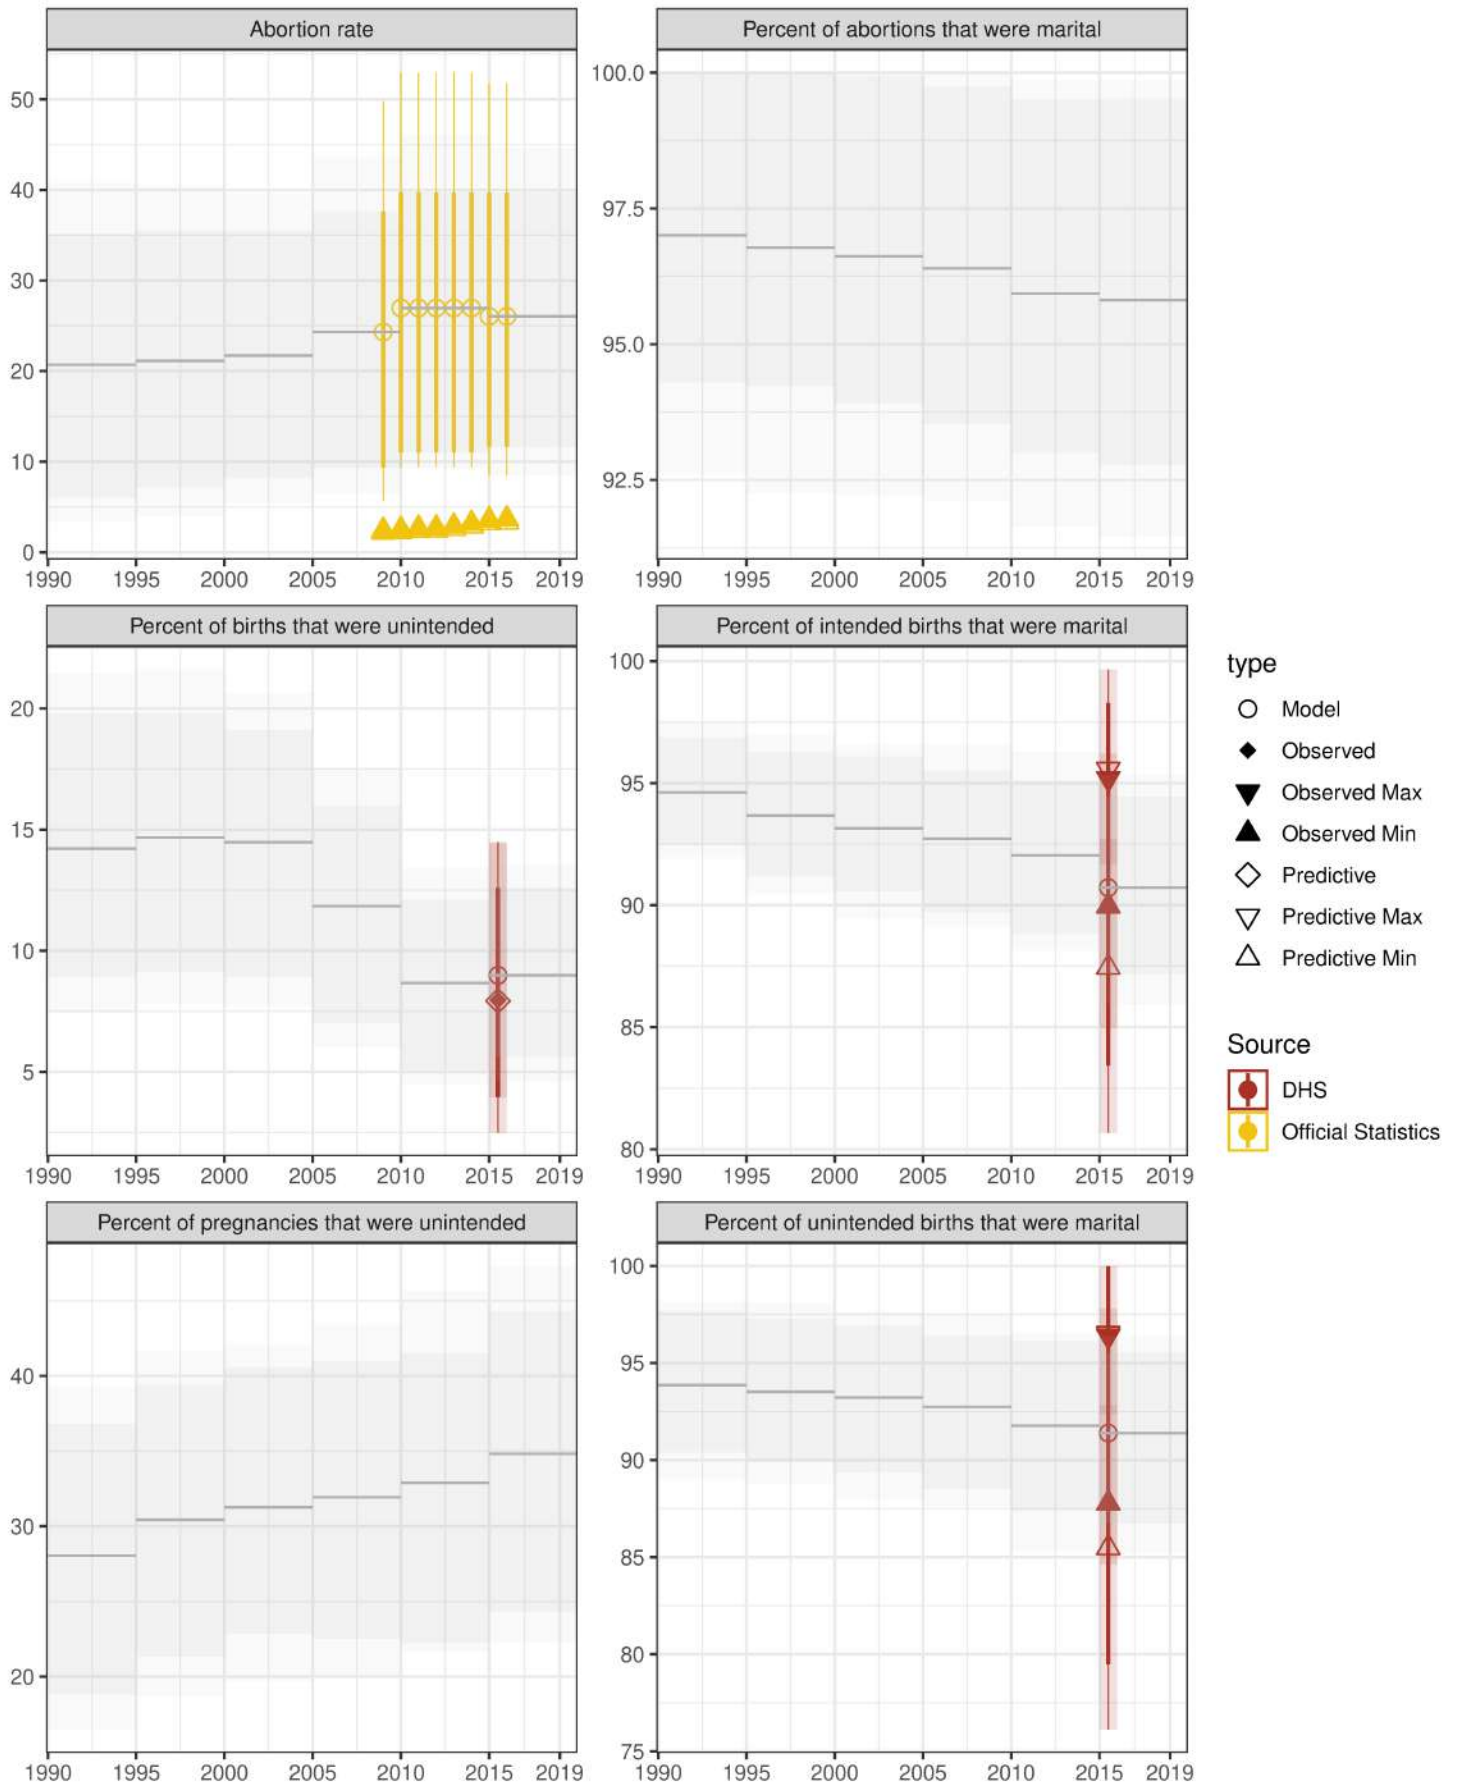

Note: Vertical lines and grey shading show 80% and 95% uncertainty intervals. Color shading shows when data were collected, if more than one year.

### Philippines

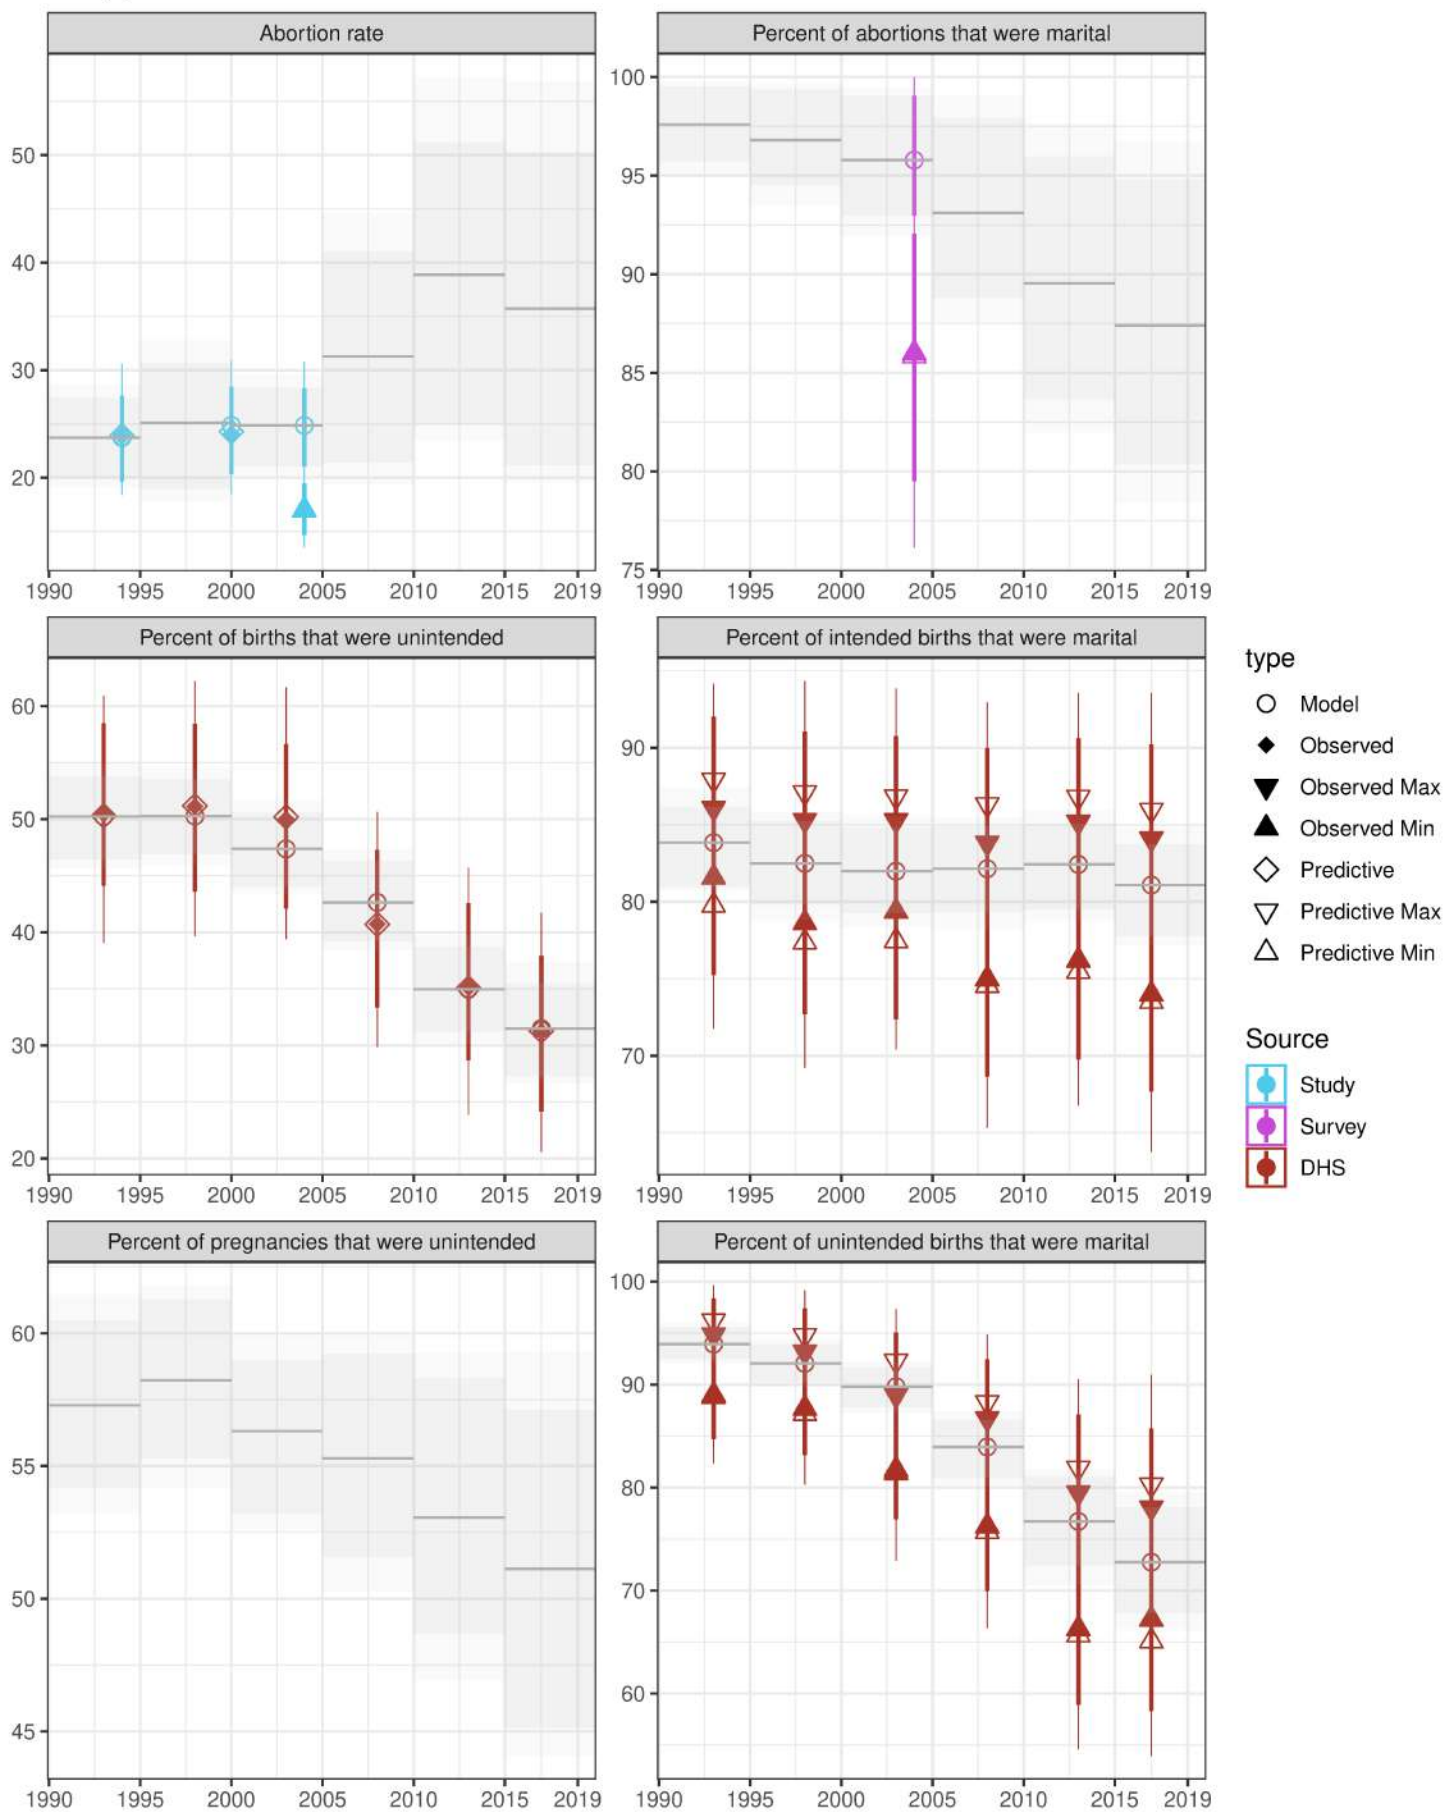

Note: Vertical lines and grey shading show 80% and 95% uncertainty intervals.

# Singapore

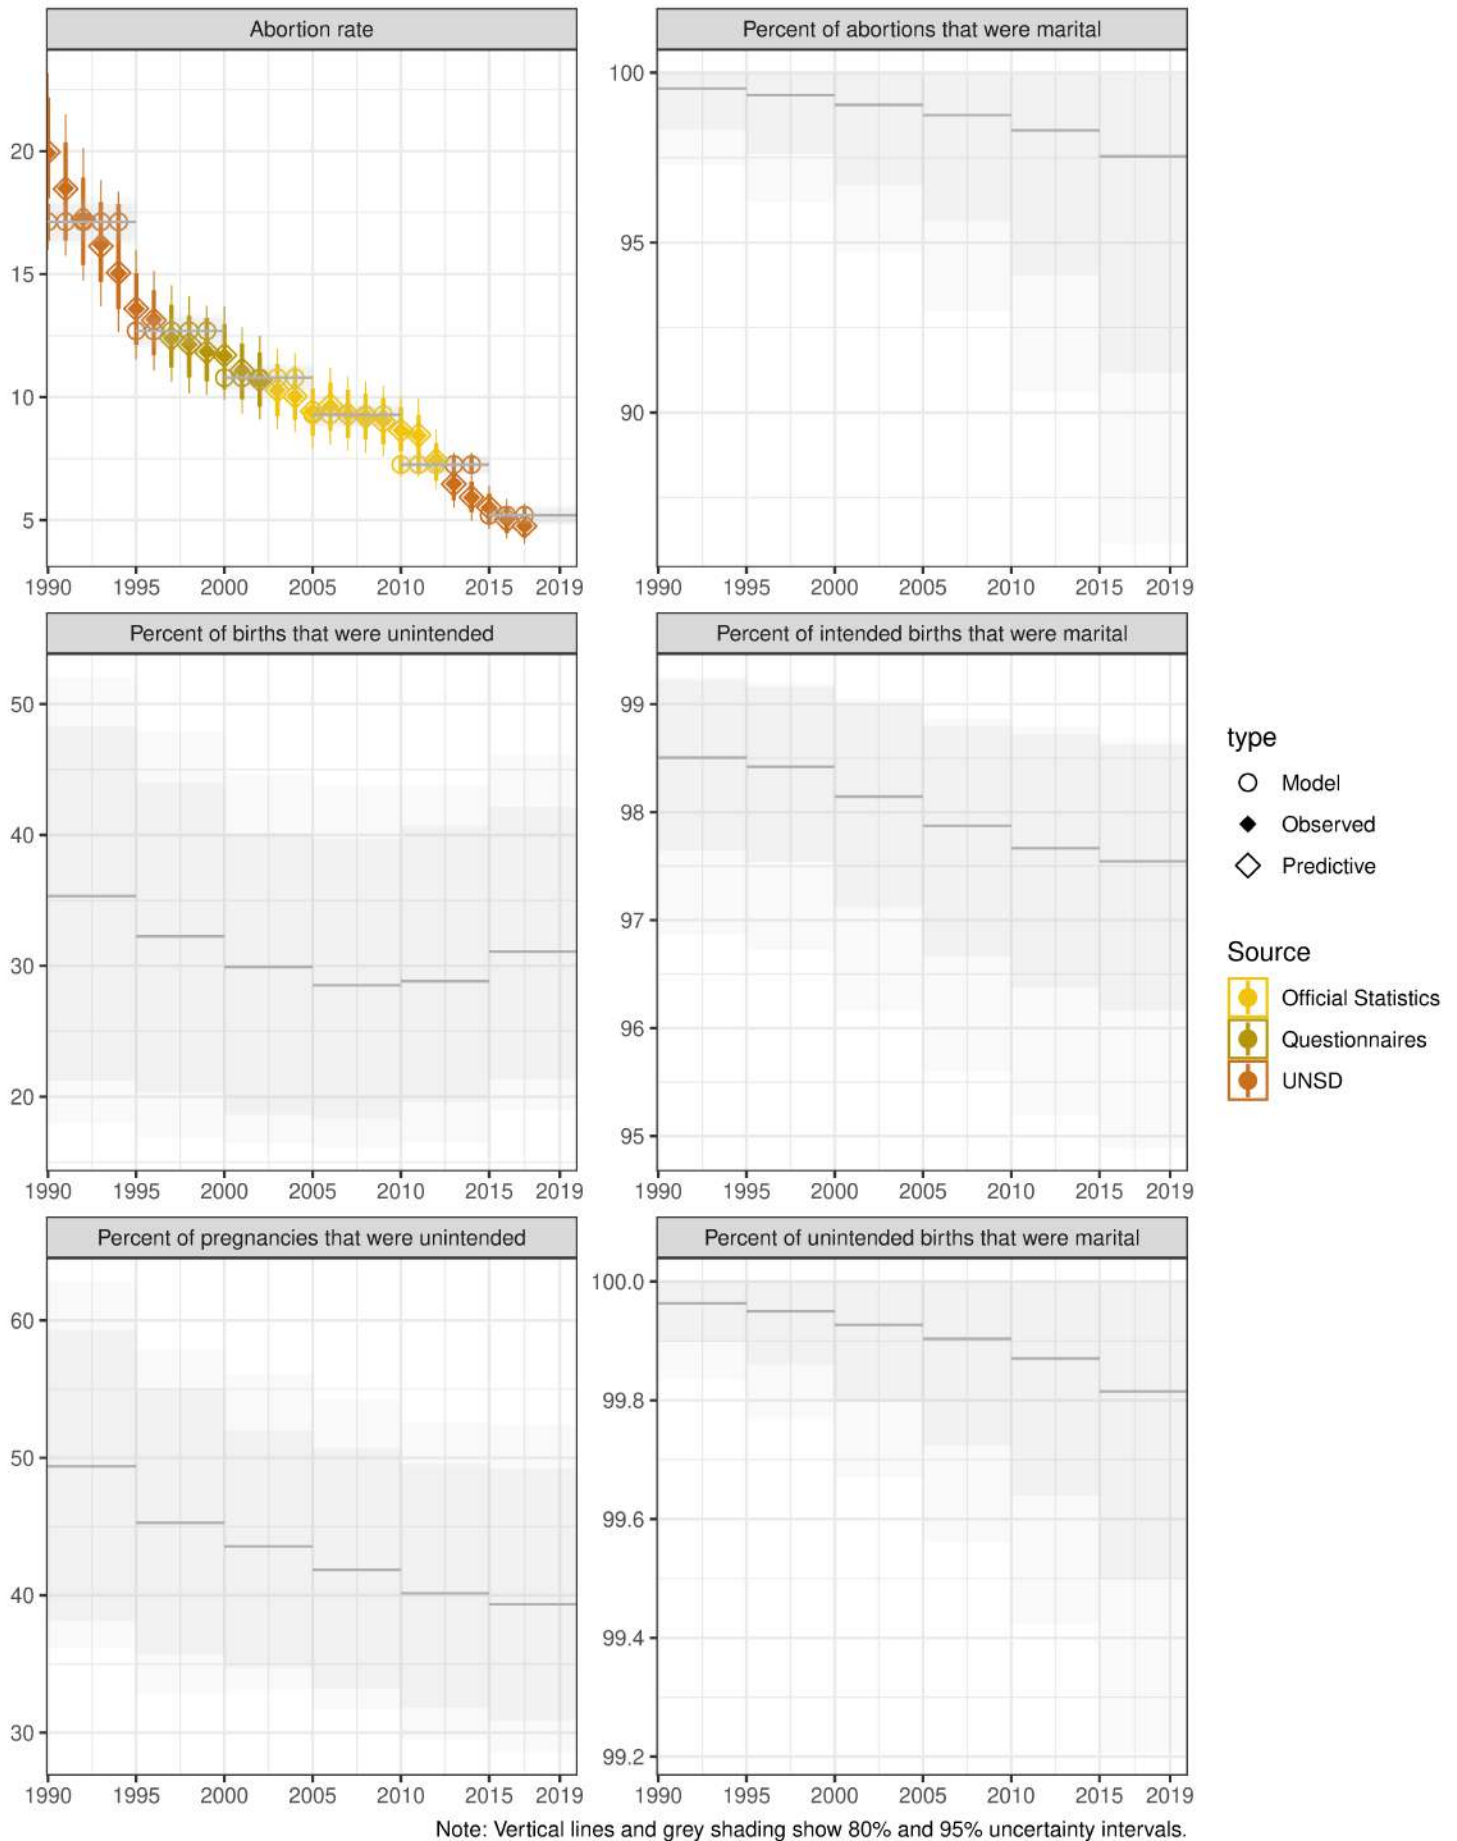

Note: Vertical lines and grey shading show 80% and 95% uncertainty intervals.

### Thailand

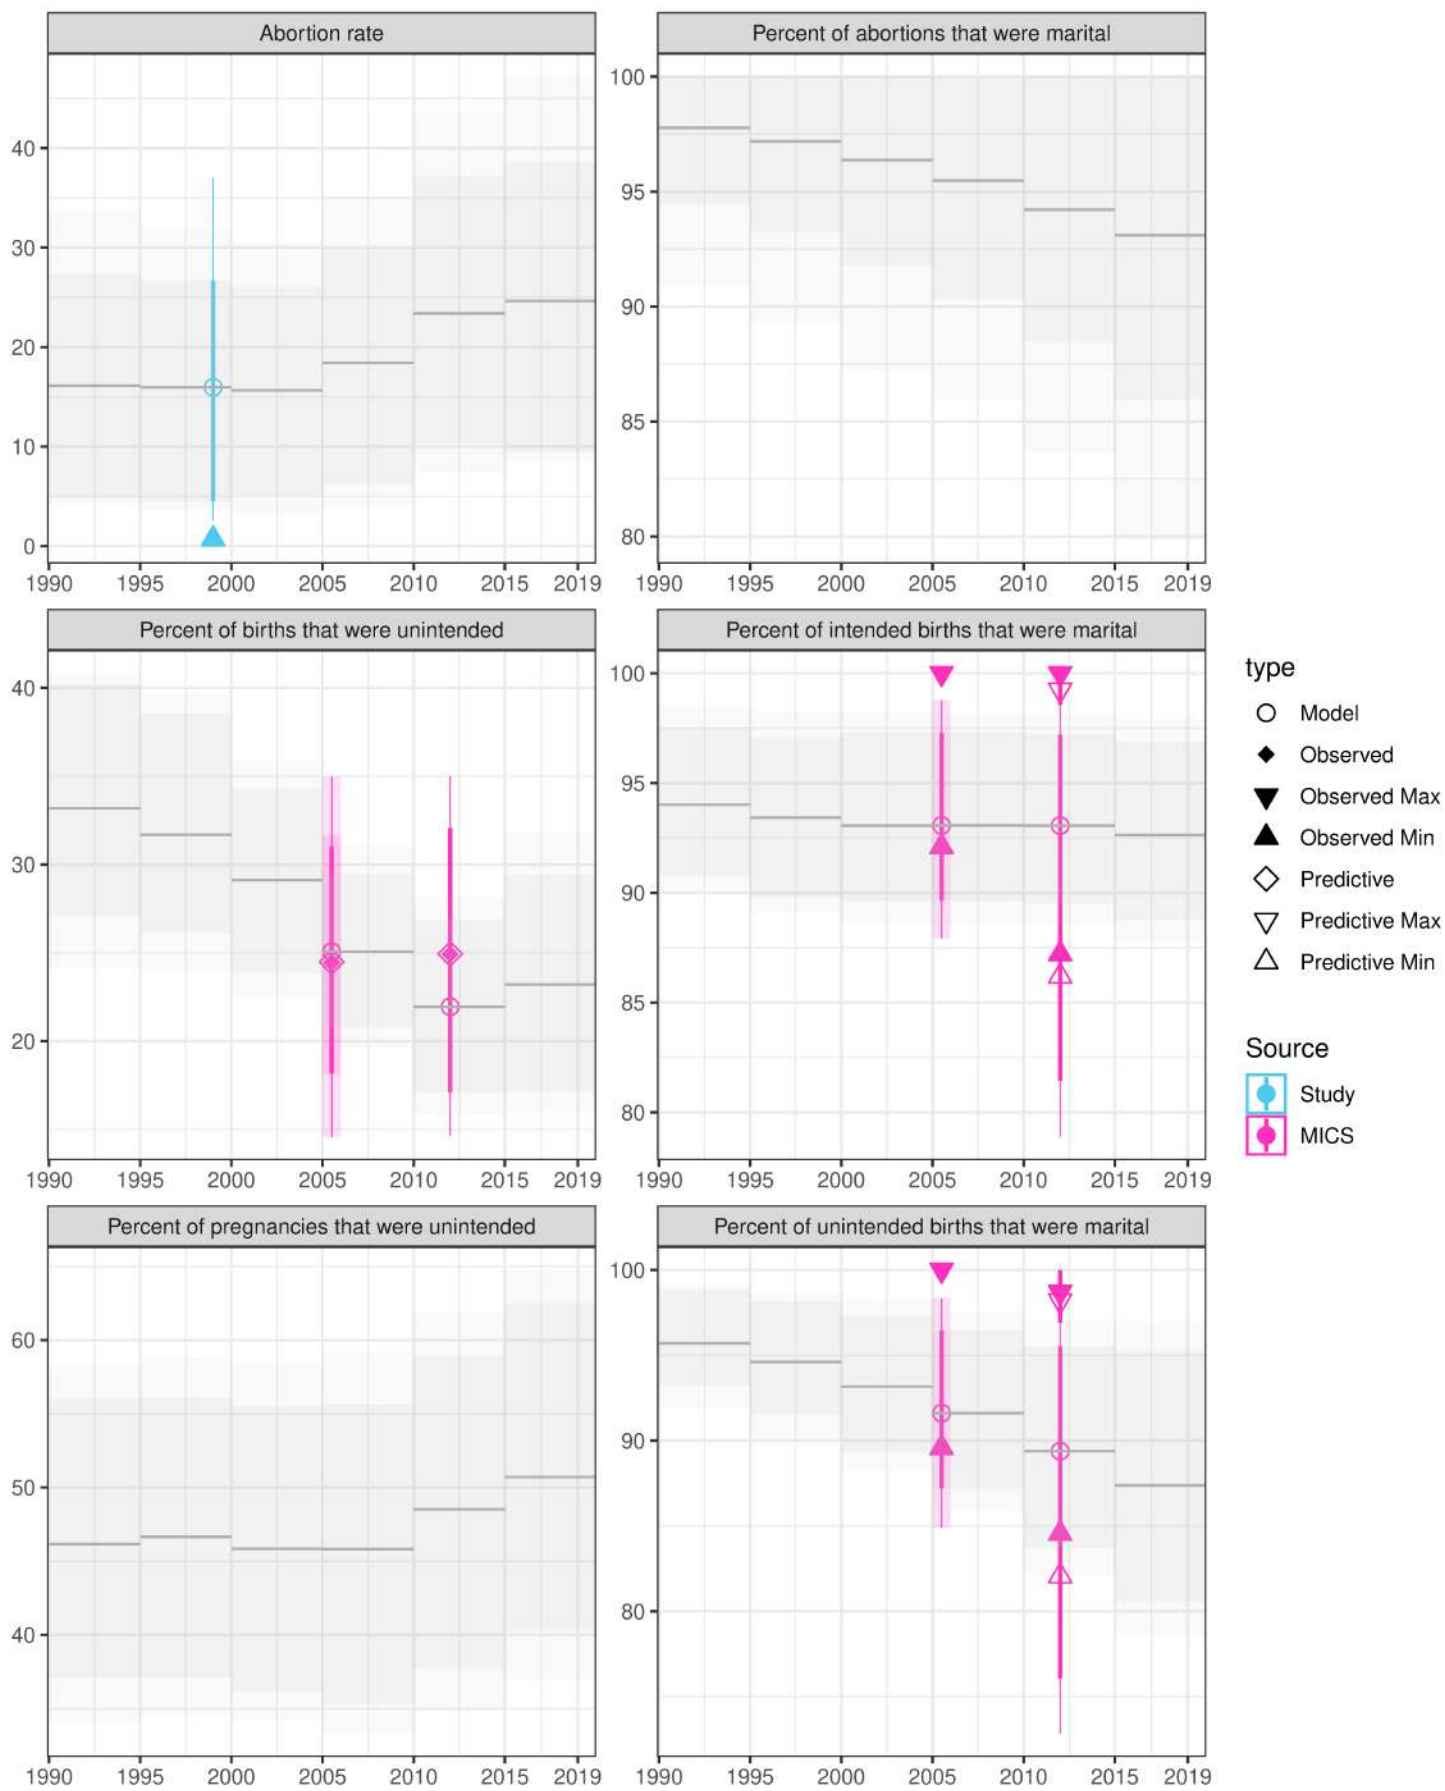

Note: Vertical lines and grey shading show 80% and 95% uncertainty intervals. Color shading shows when data were collected, if more than one year.

### Timor-Leste

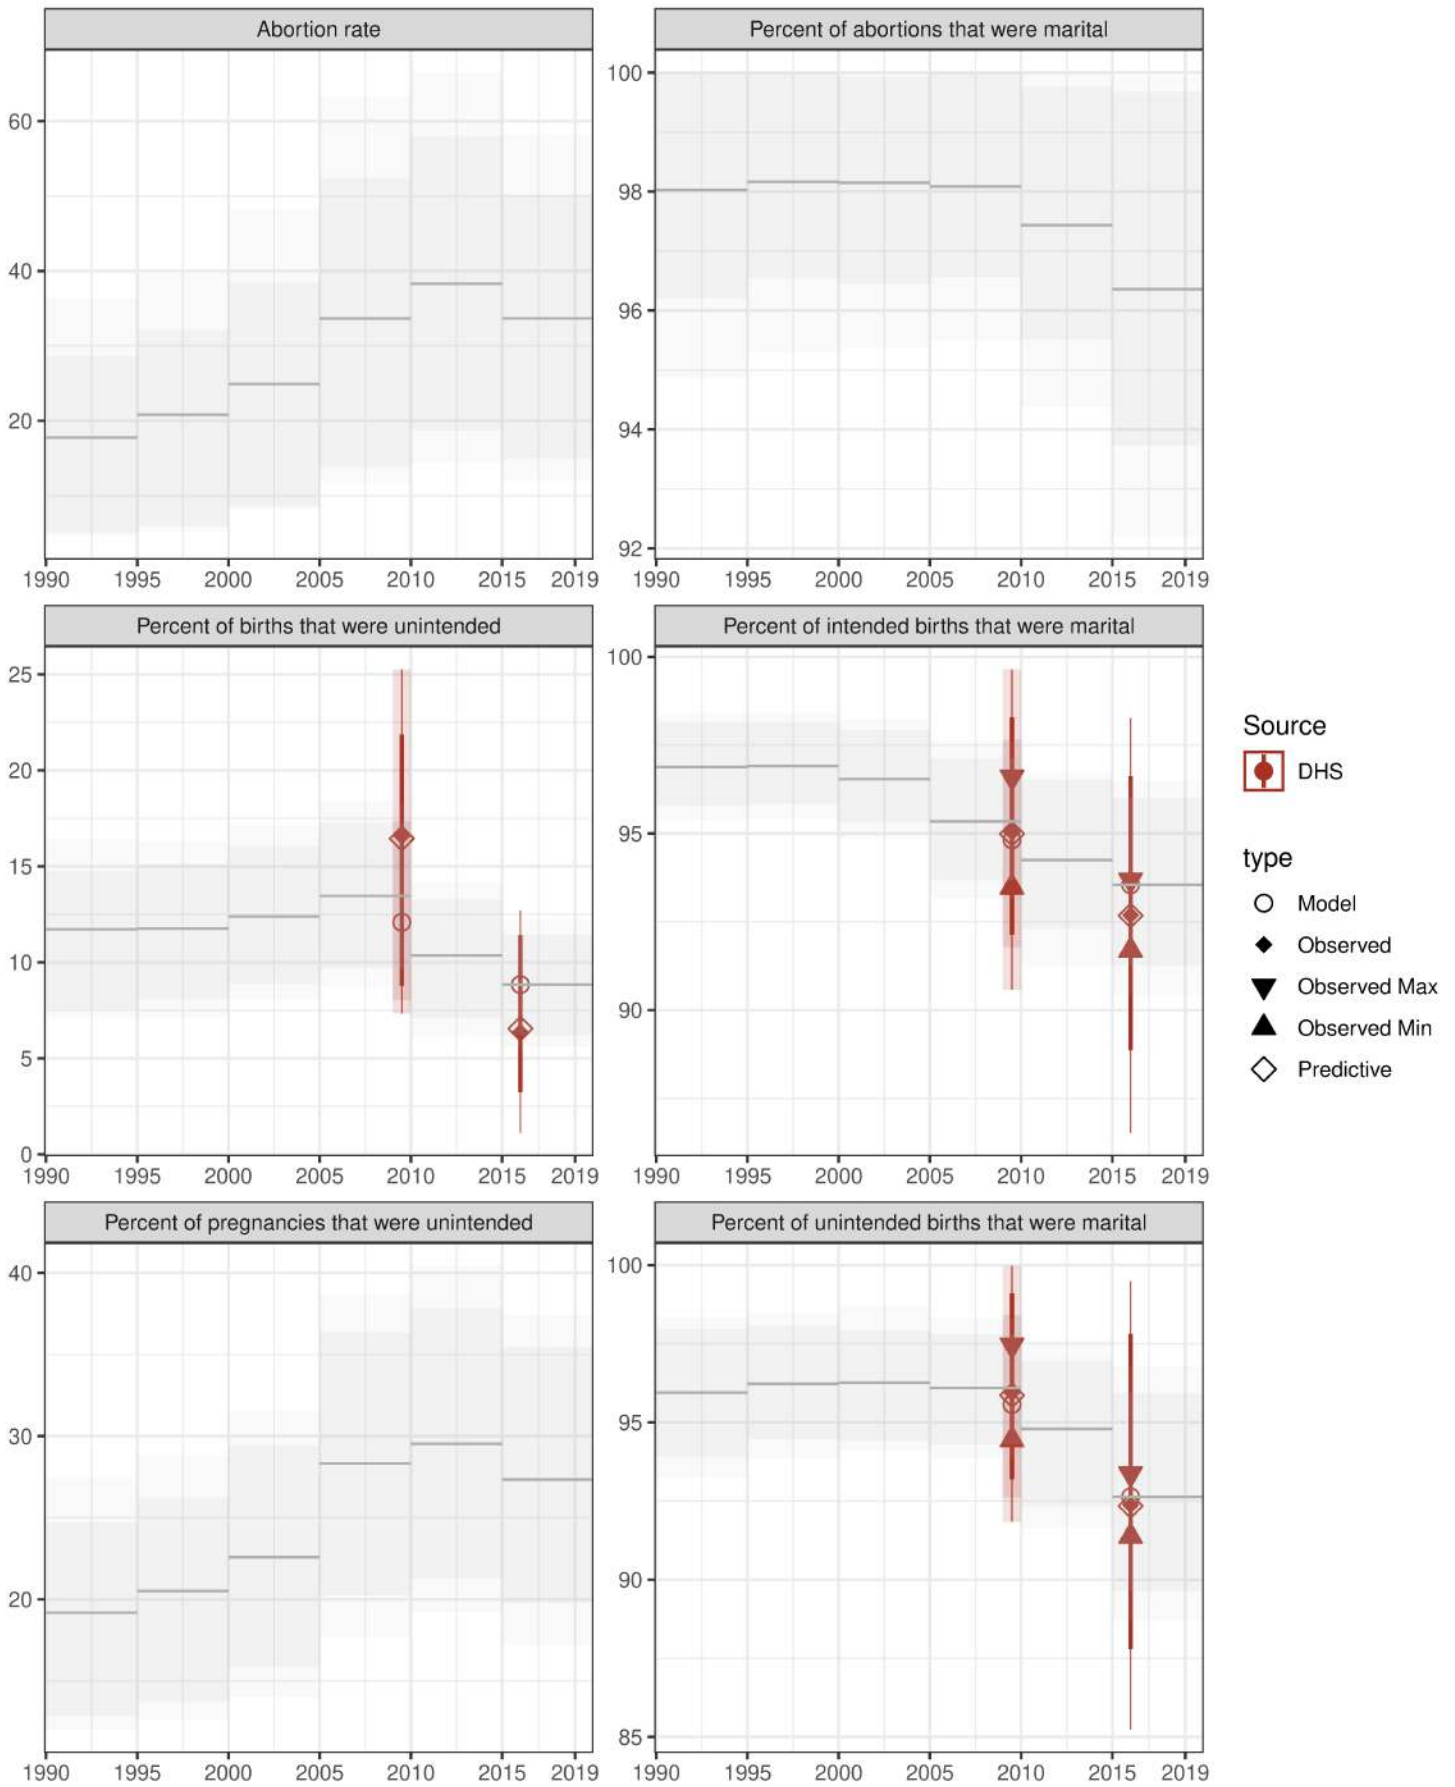

Note: Vertical lines and grey shading show 80% and 95% uncertainty intervals. Color shading shows when data were collected, if more than one year.



Viet Nam

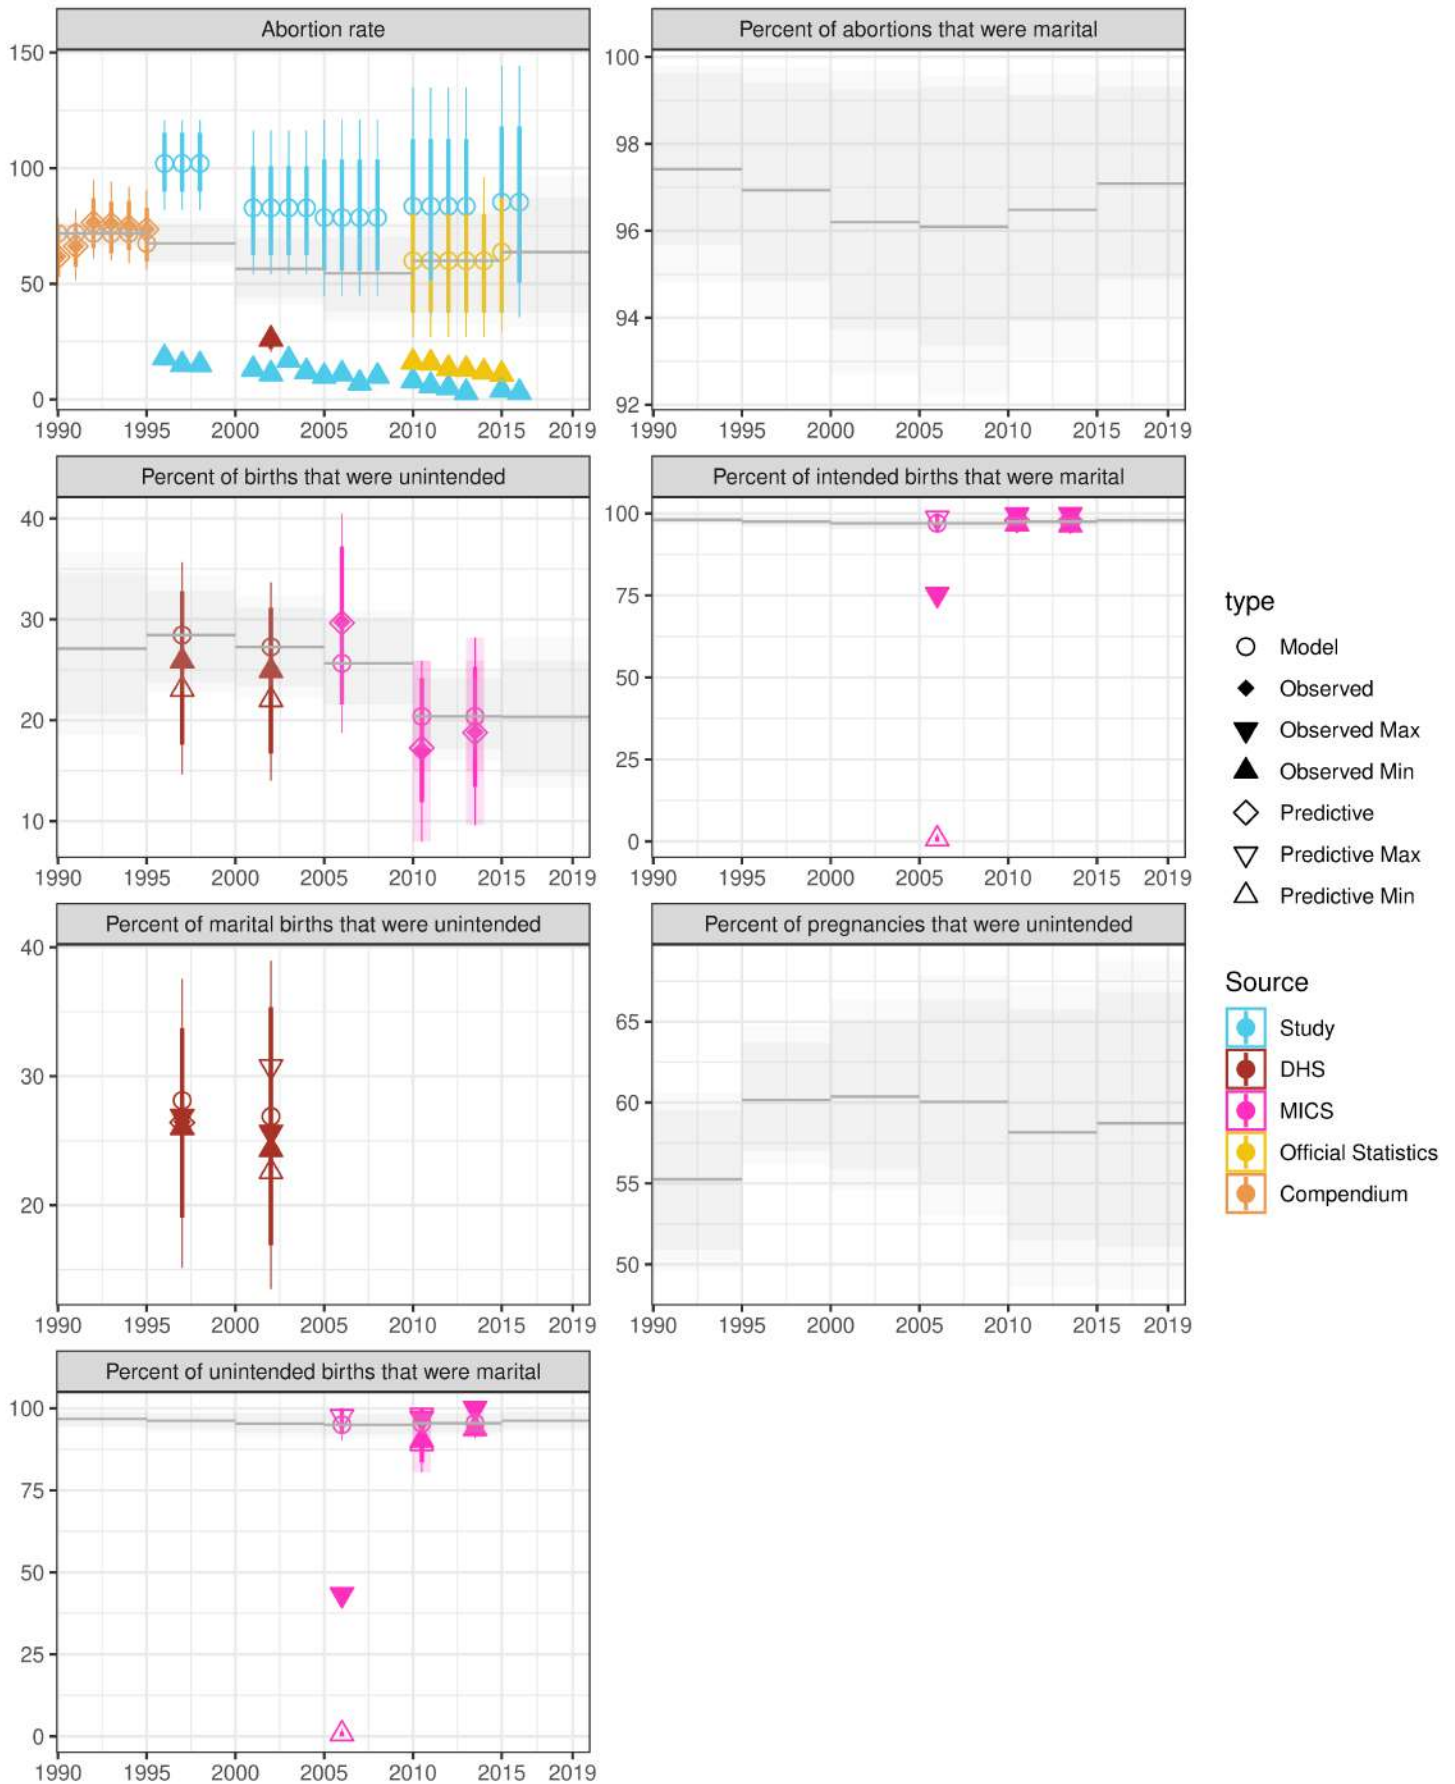

Note: Vertical lines and grey shading show 80% and 95% uncertainty intervals. Color shading shows when data were collected, if more than one year.

## **5 Latin America and the Caribbean**

### **5.1 South America**

### Argentina

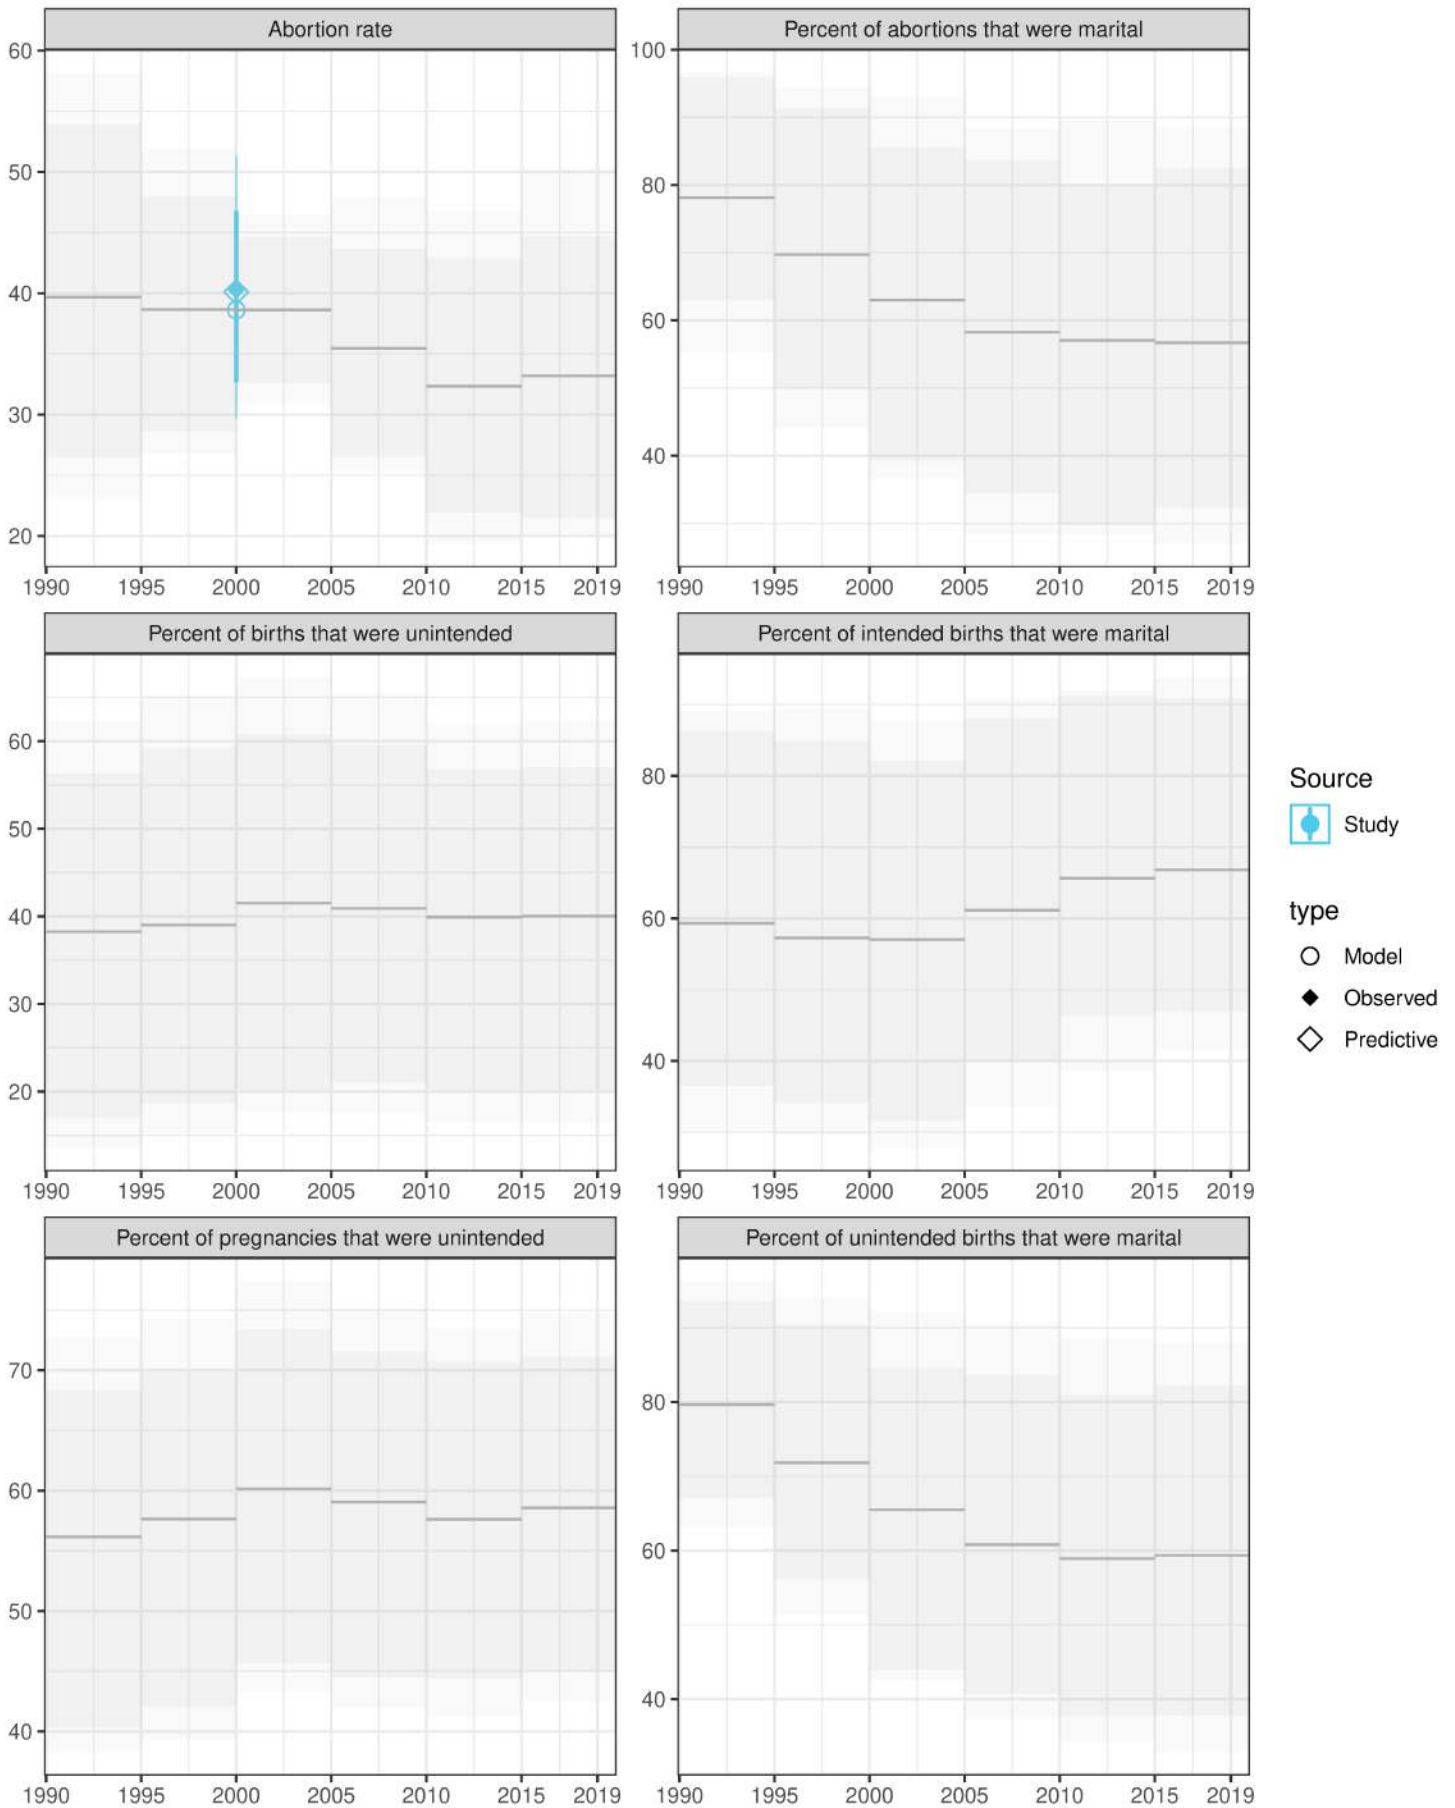

Note: Vertical lines and grey shading show 80% and 95% uncertainty intervals.

### Bolivia

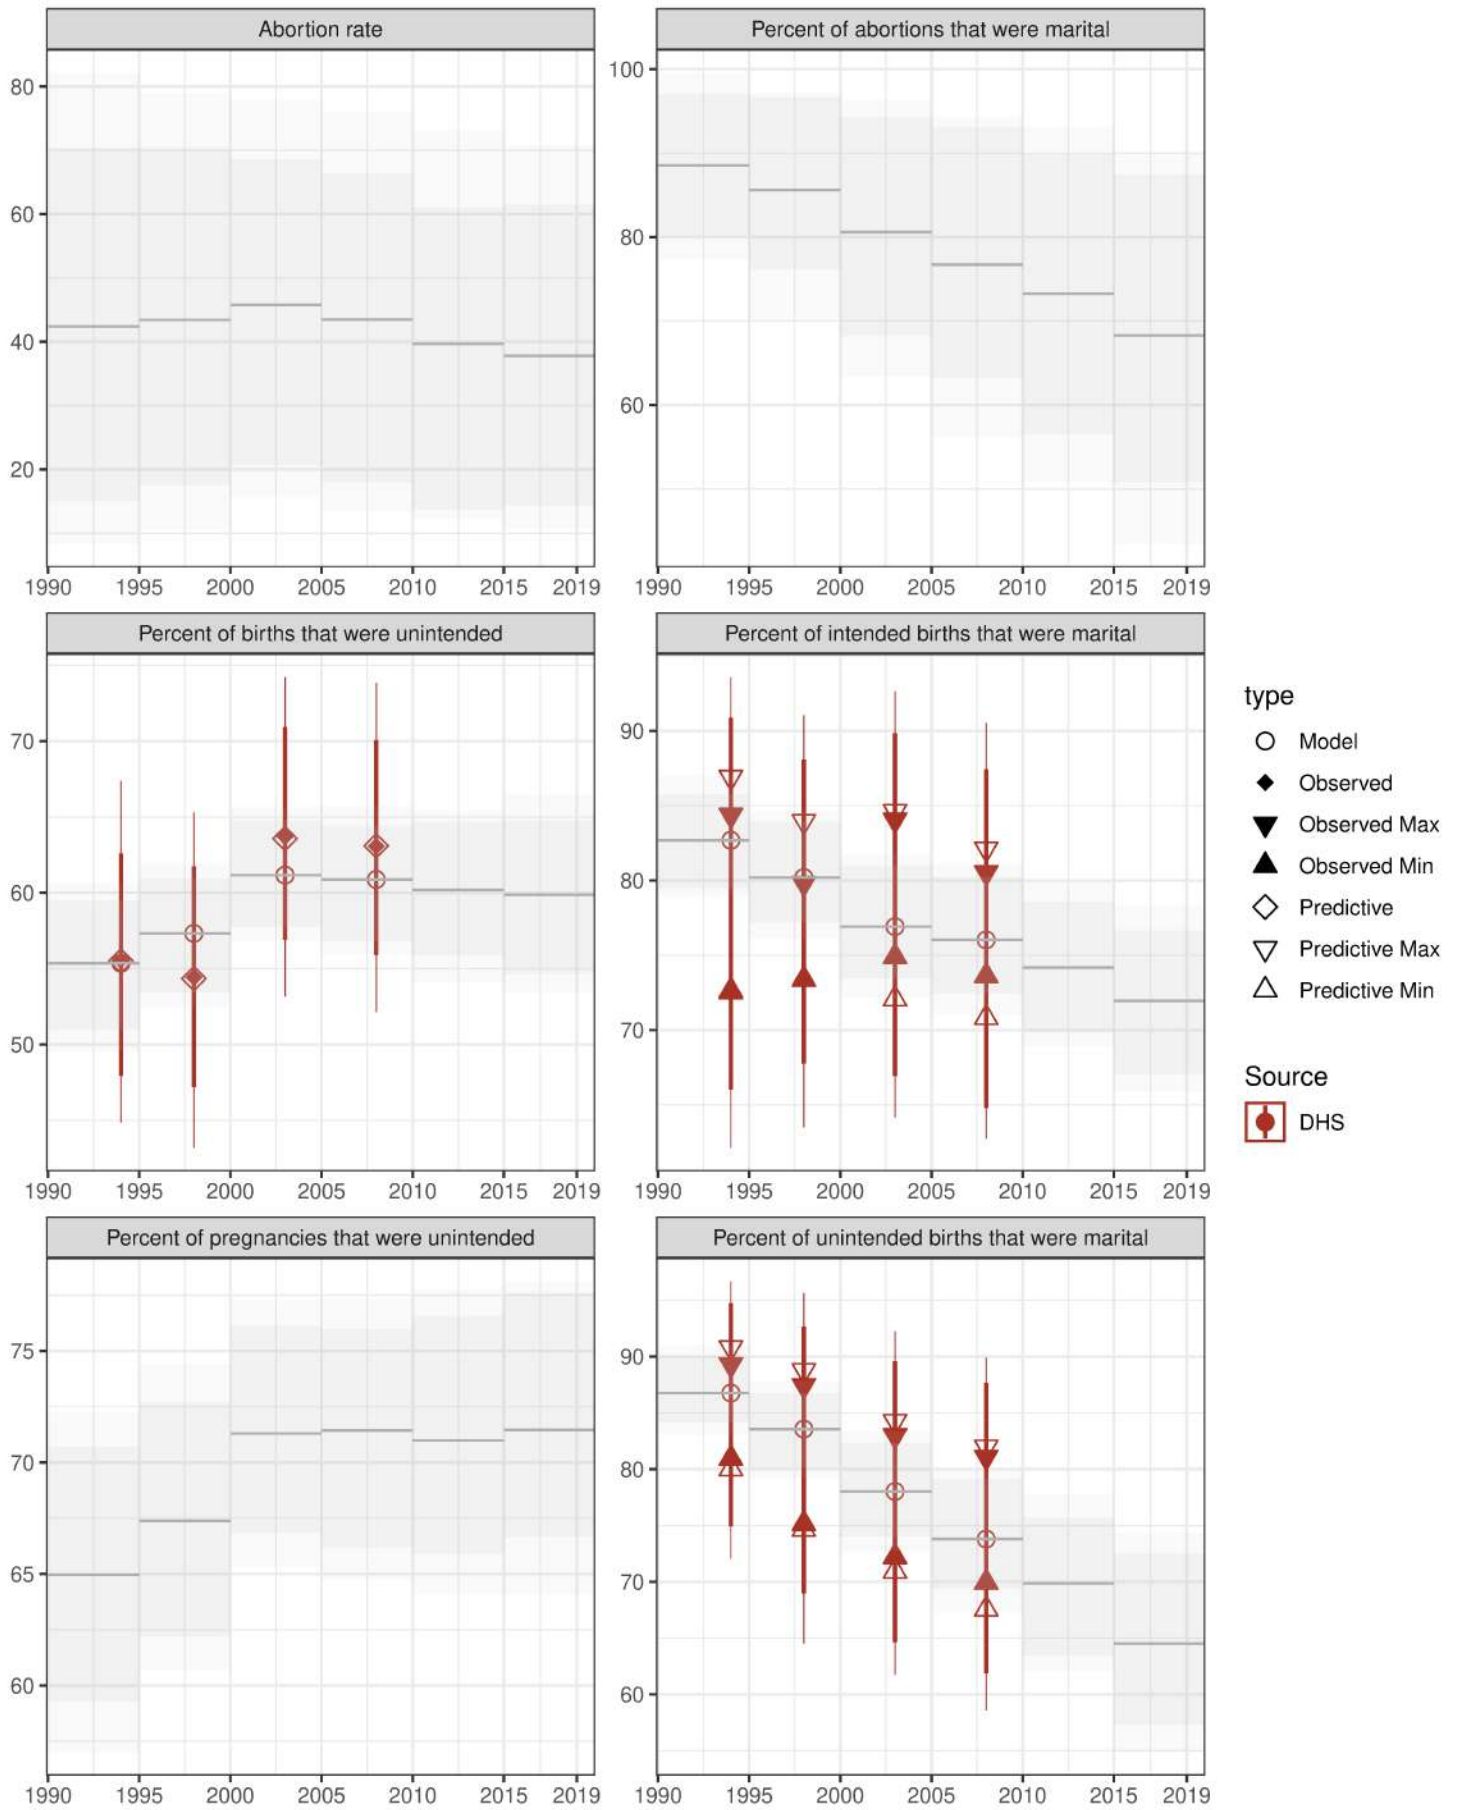

Note: Vertical lines and grey shading show 80% and 95% uncertainty intervals.

### Brazil

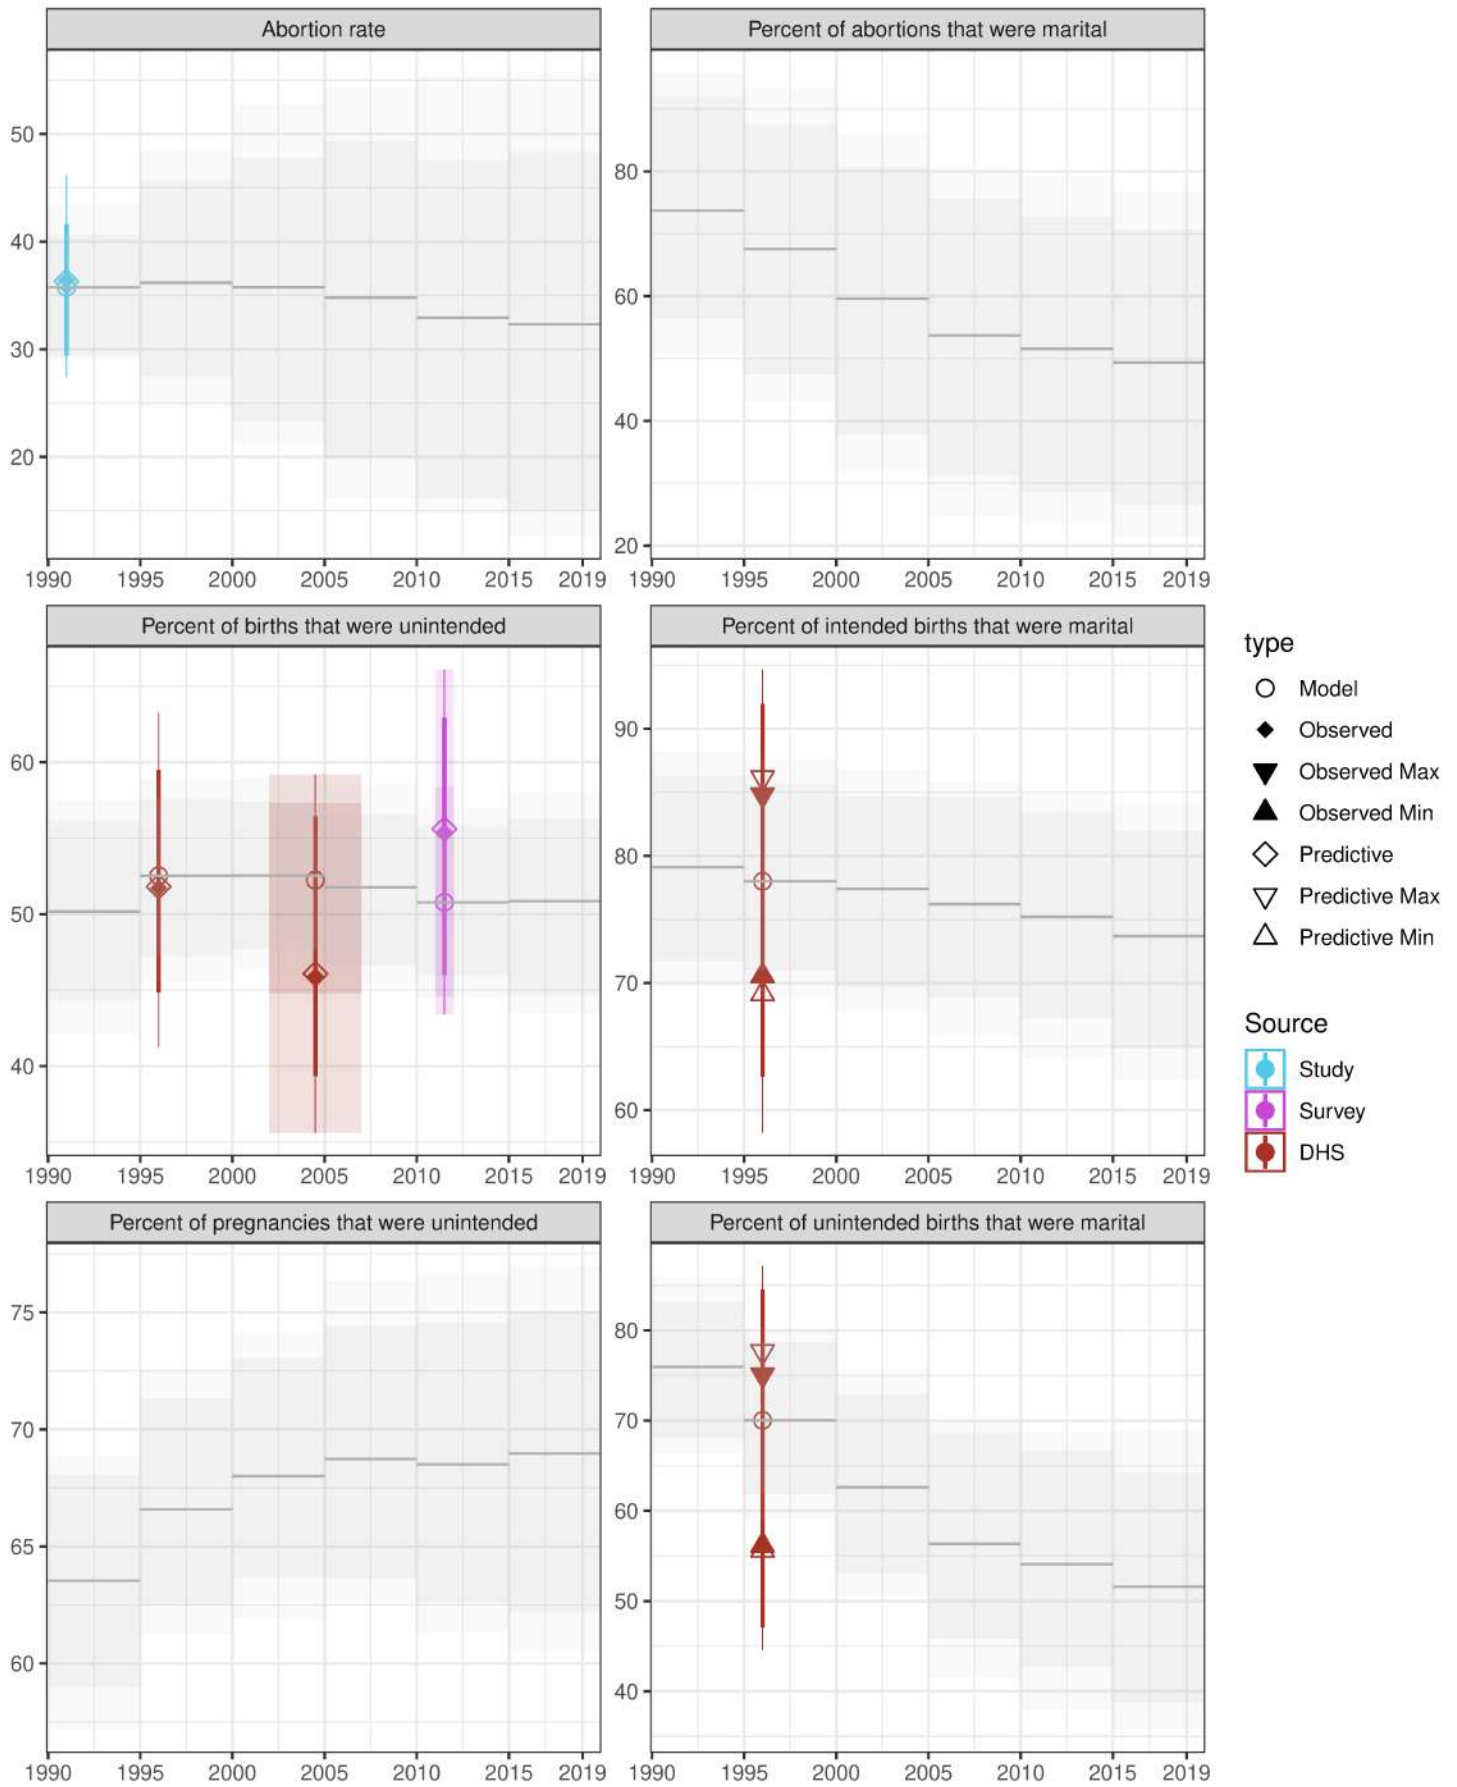

Note: Vertical lines and grey shading show 80% and 95% uncertainty intervals. Color shading shows when data were collected, if more than one year.

### Chile

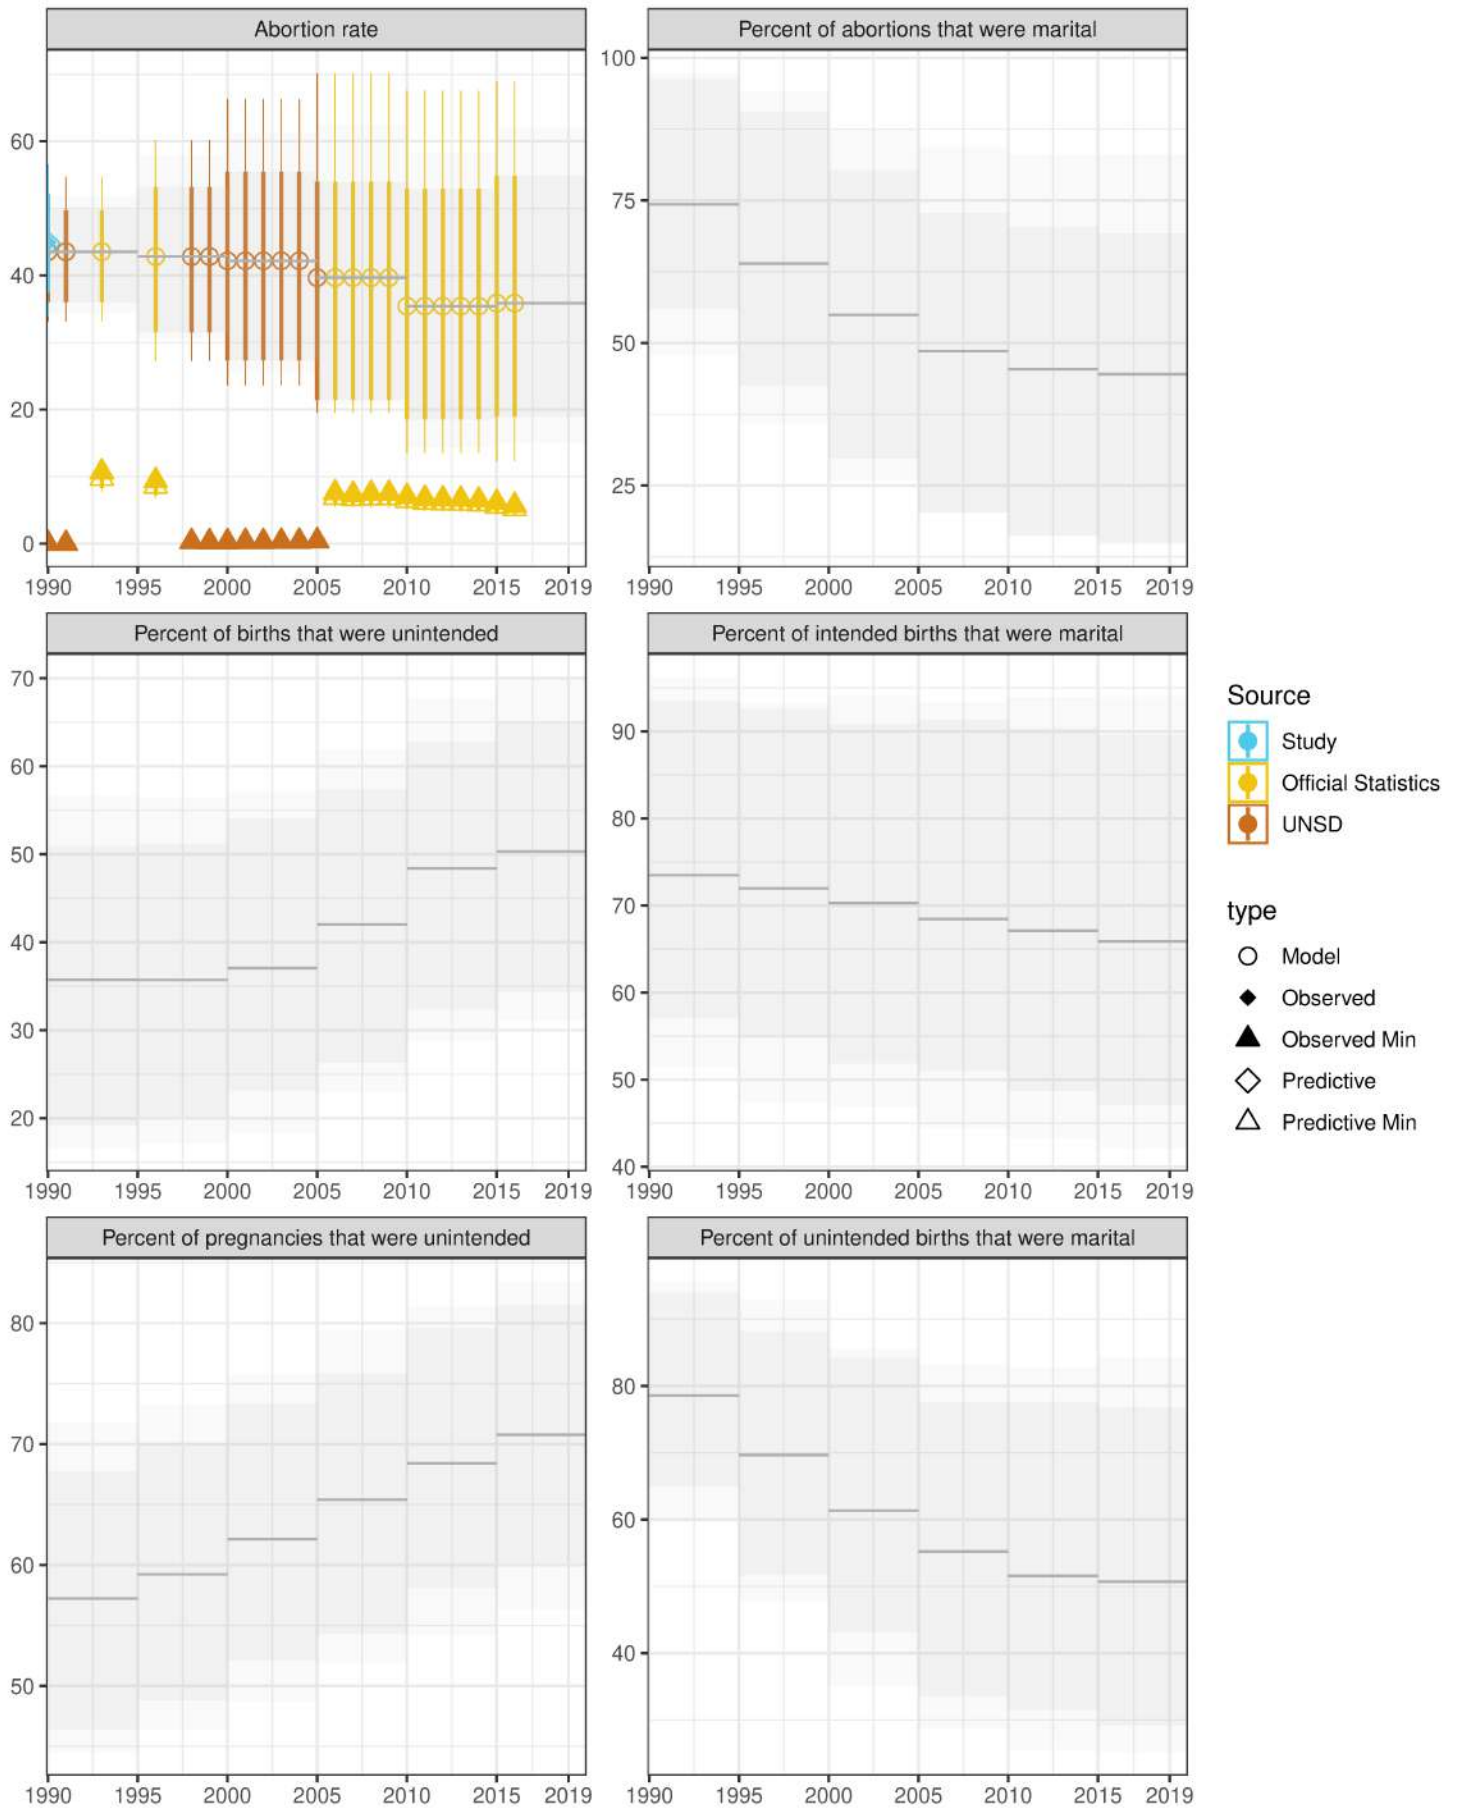

### Colombia

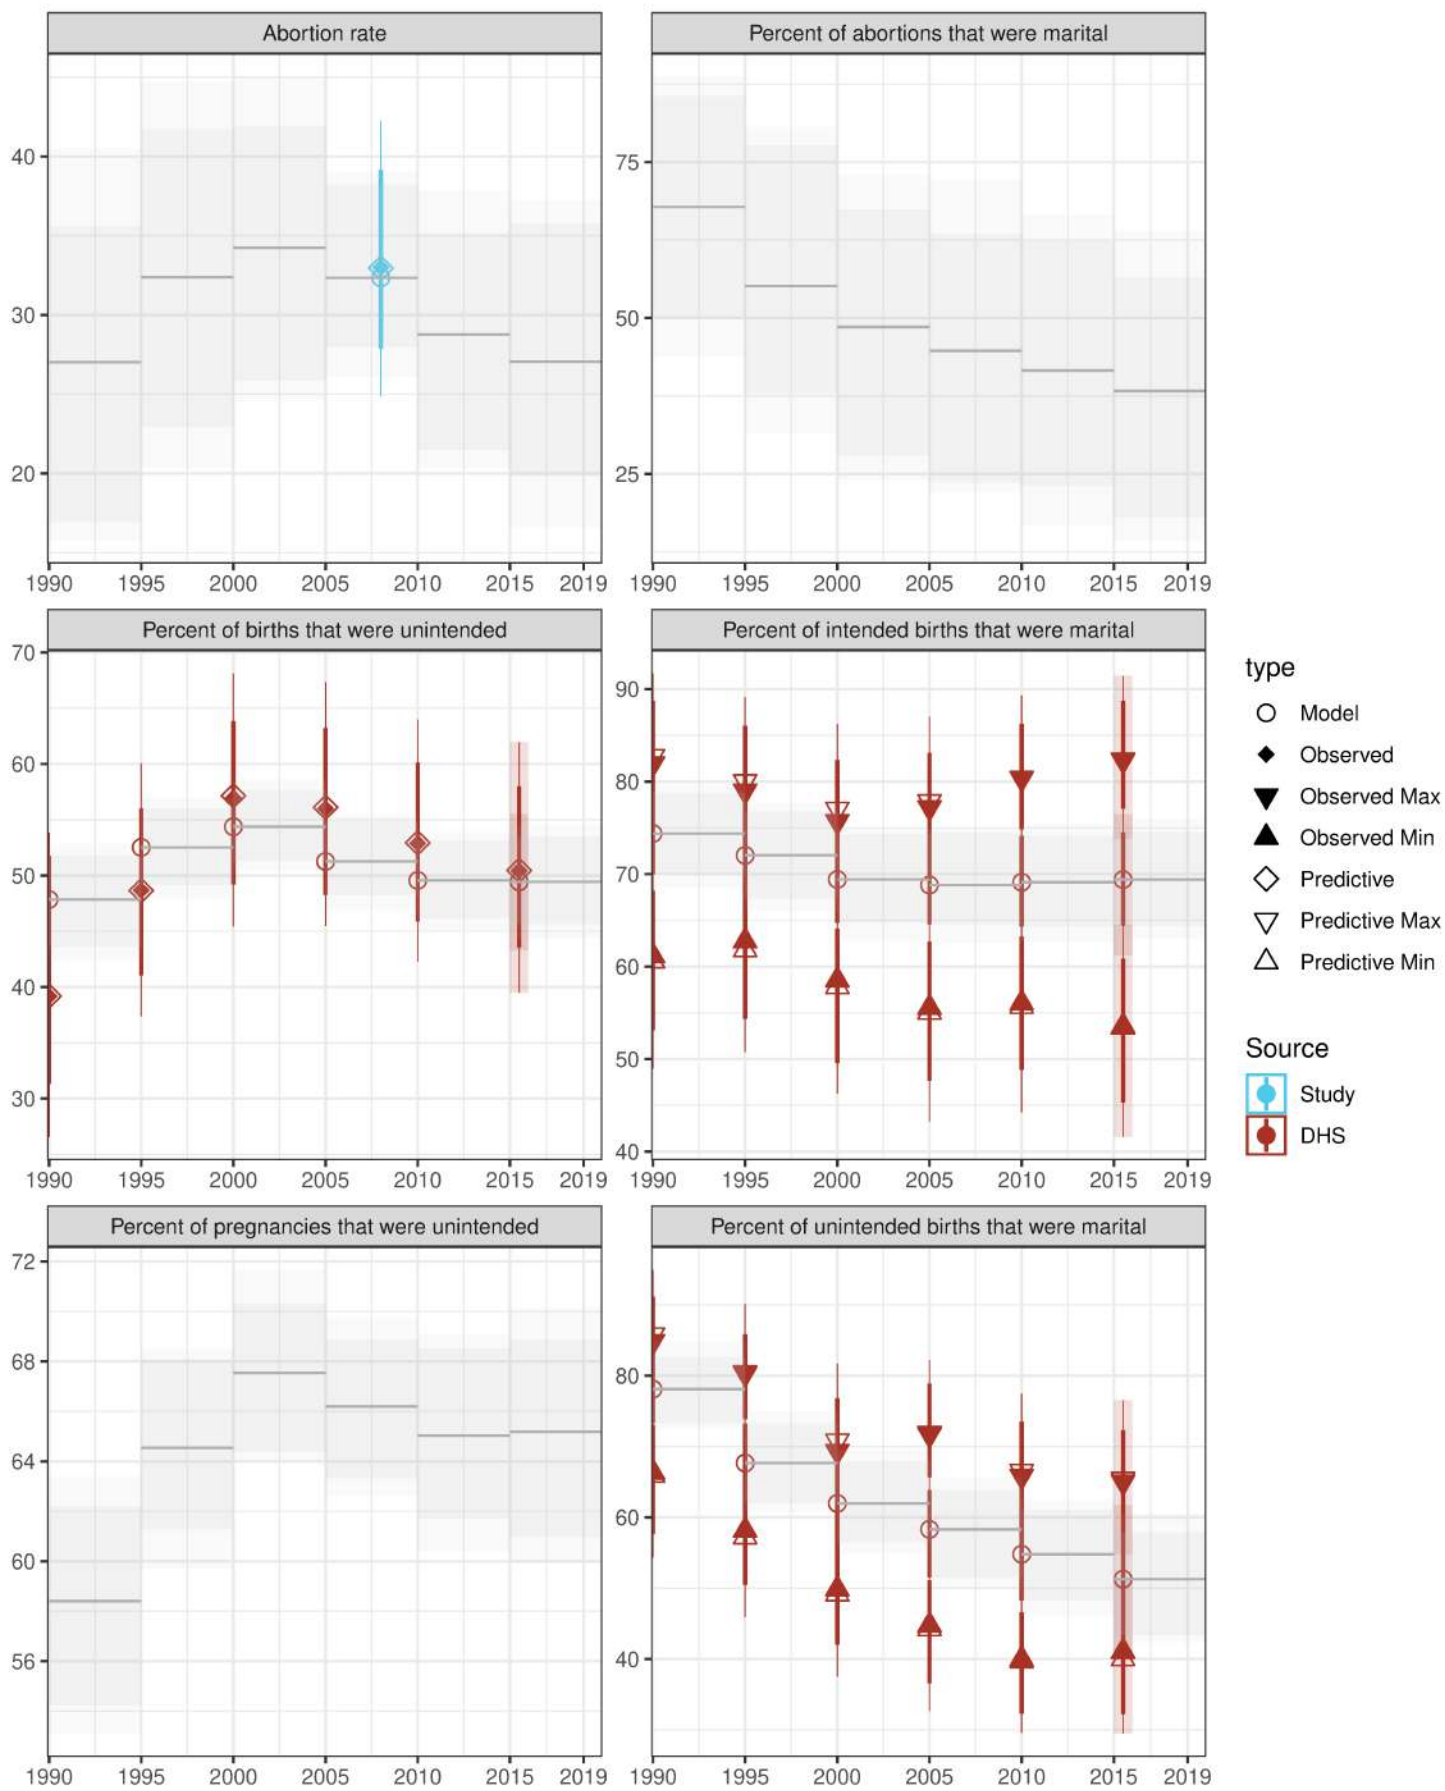

Note: Vertical lines and grey shading show 80% and 95% uncertainty intervals. Color shading shows when data were collected, if more than one year.

### Ecuador

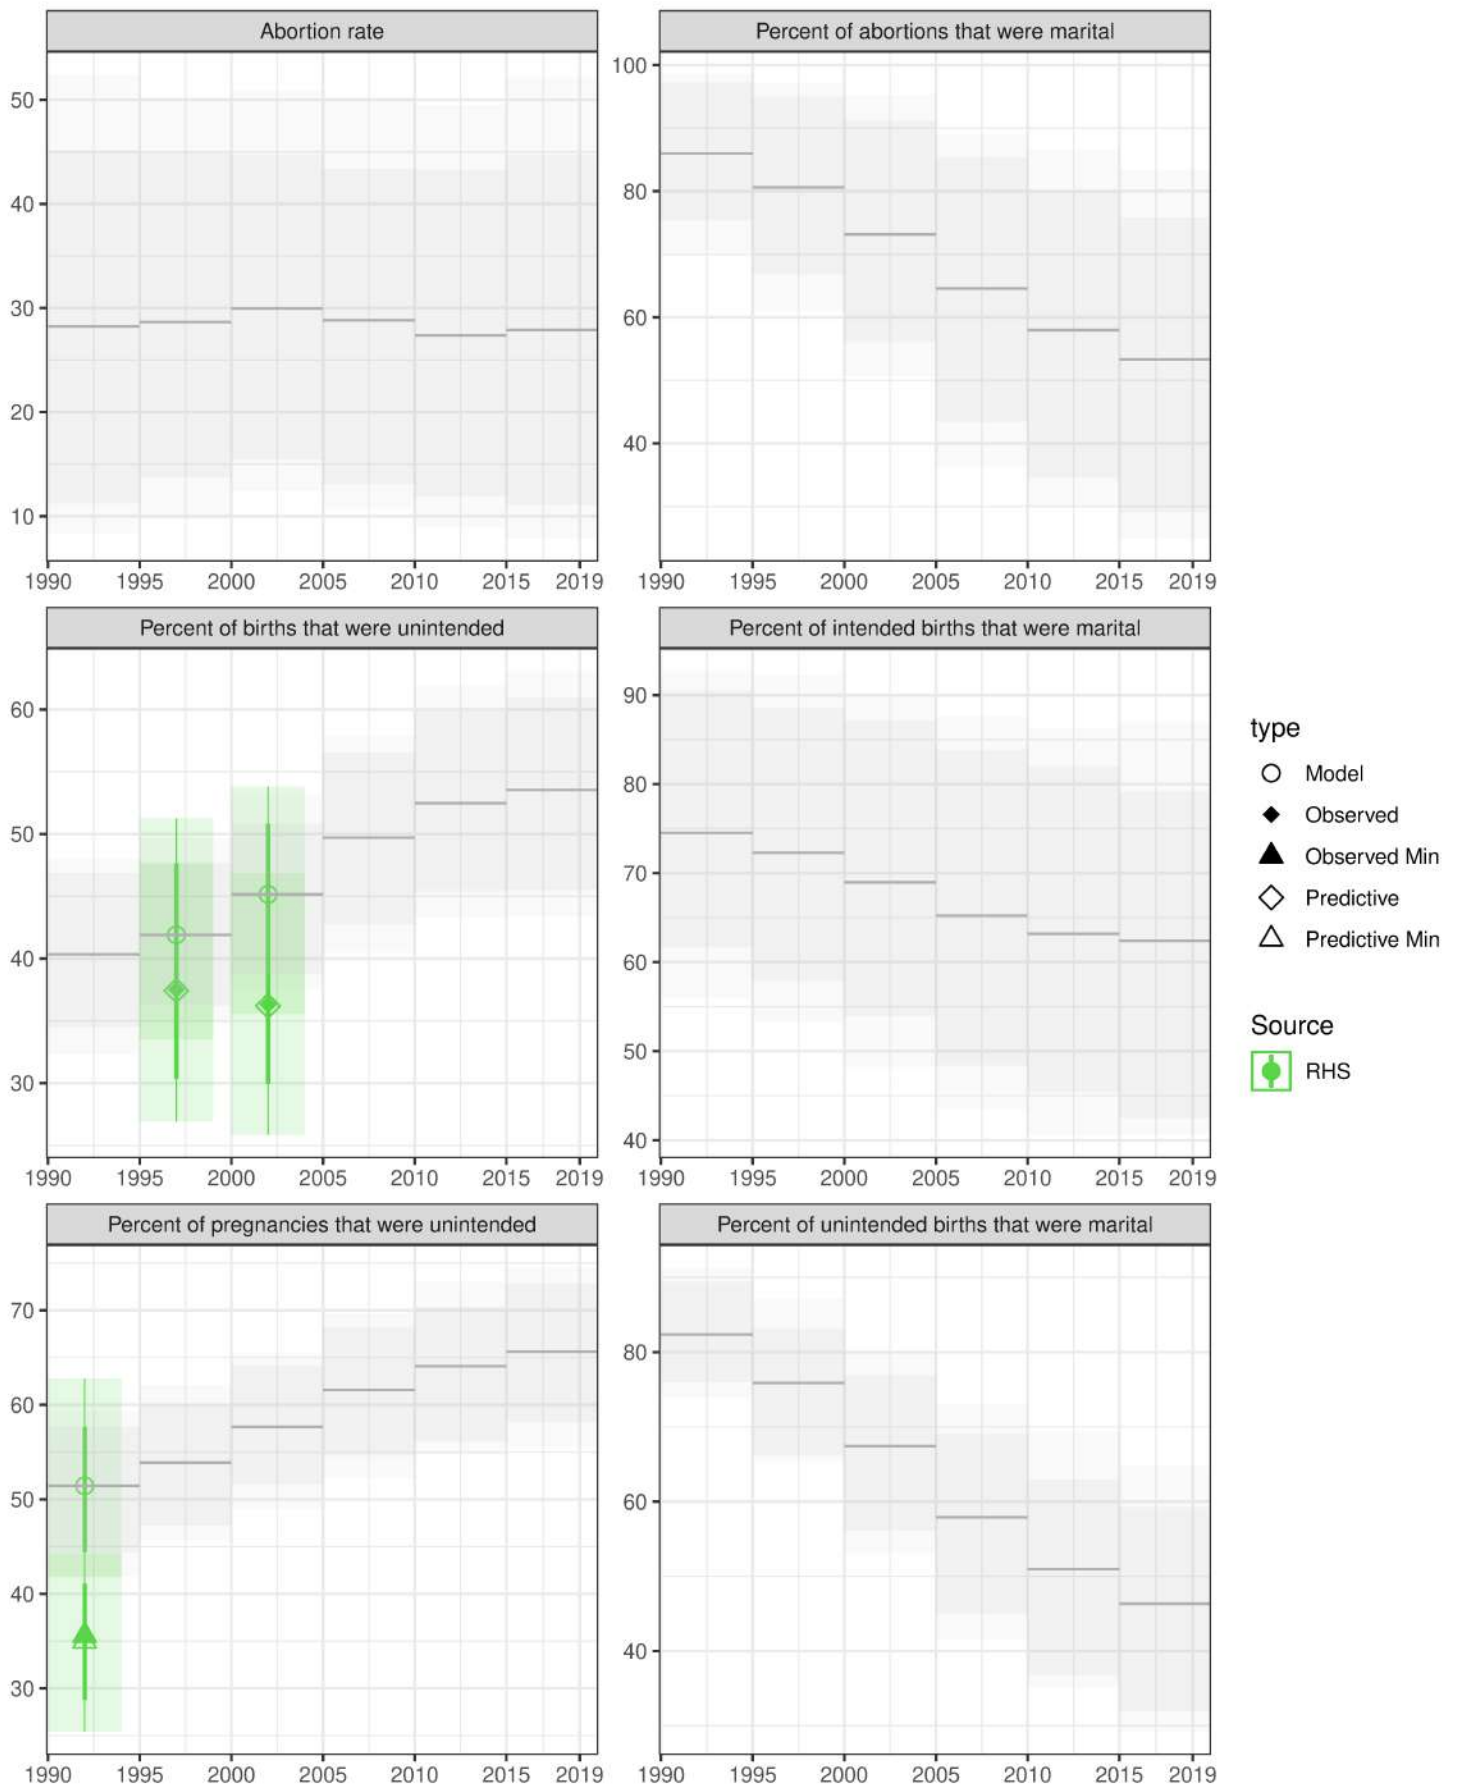

Note: Vertical lines and grey shading show 80% and 95% uncertainty intervals. Color shading shows when data were collected, if more than one year.



### French Guiana

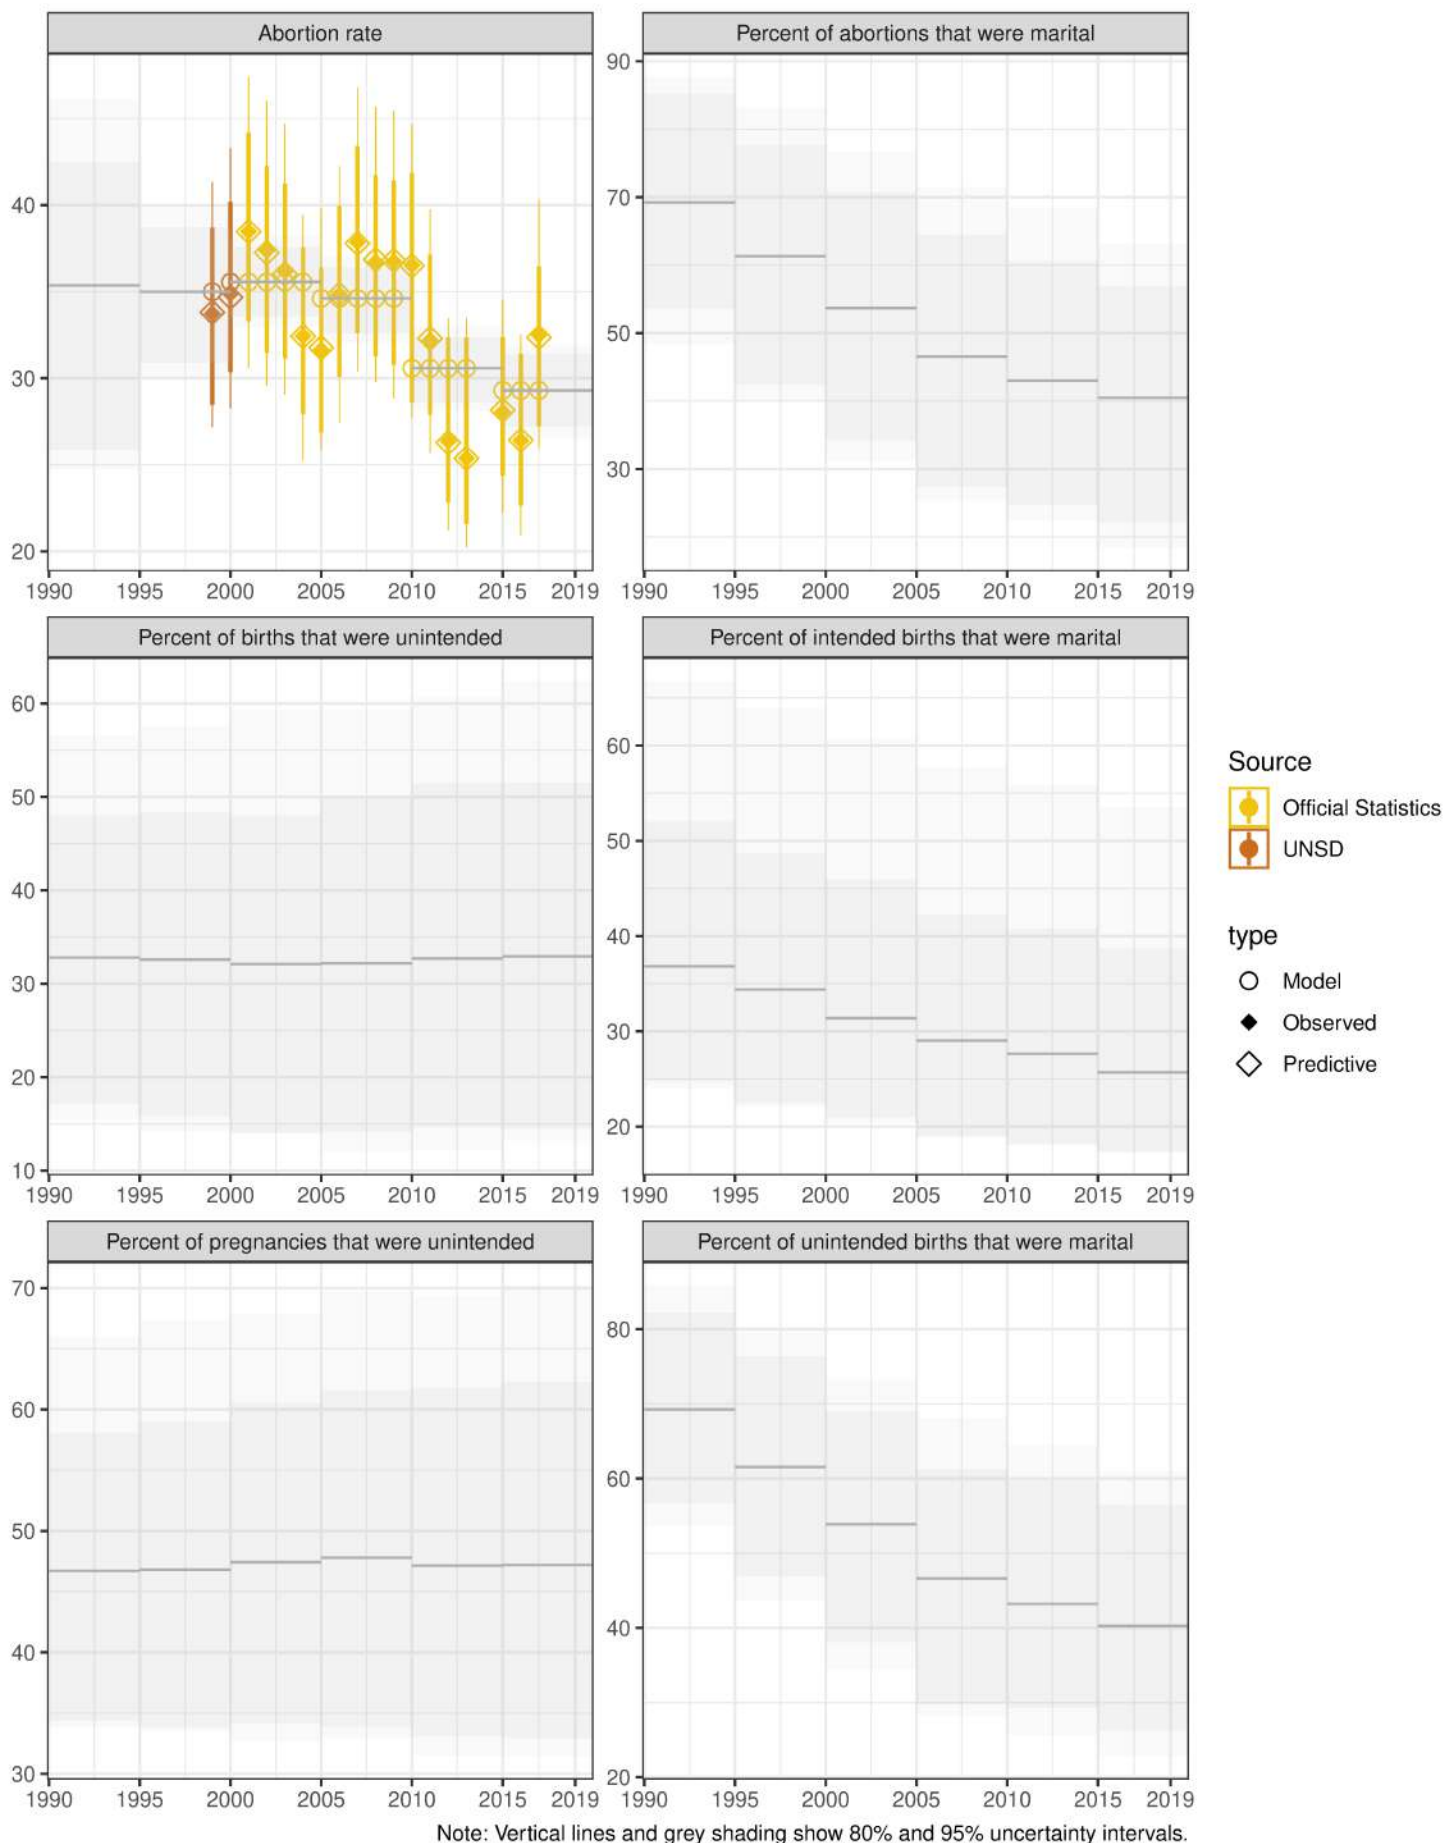

### Guyana

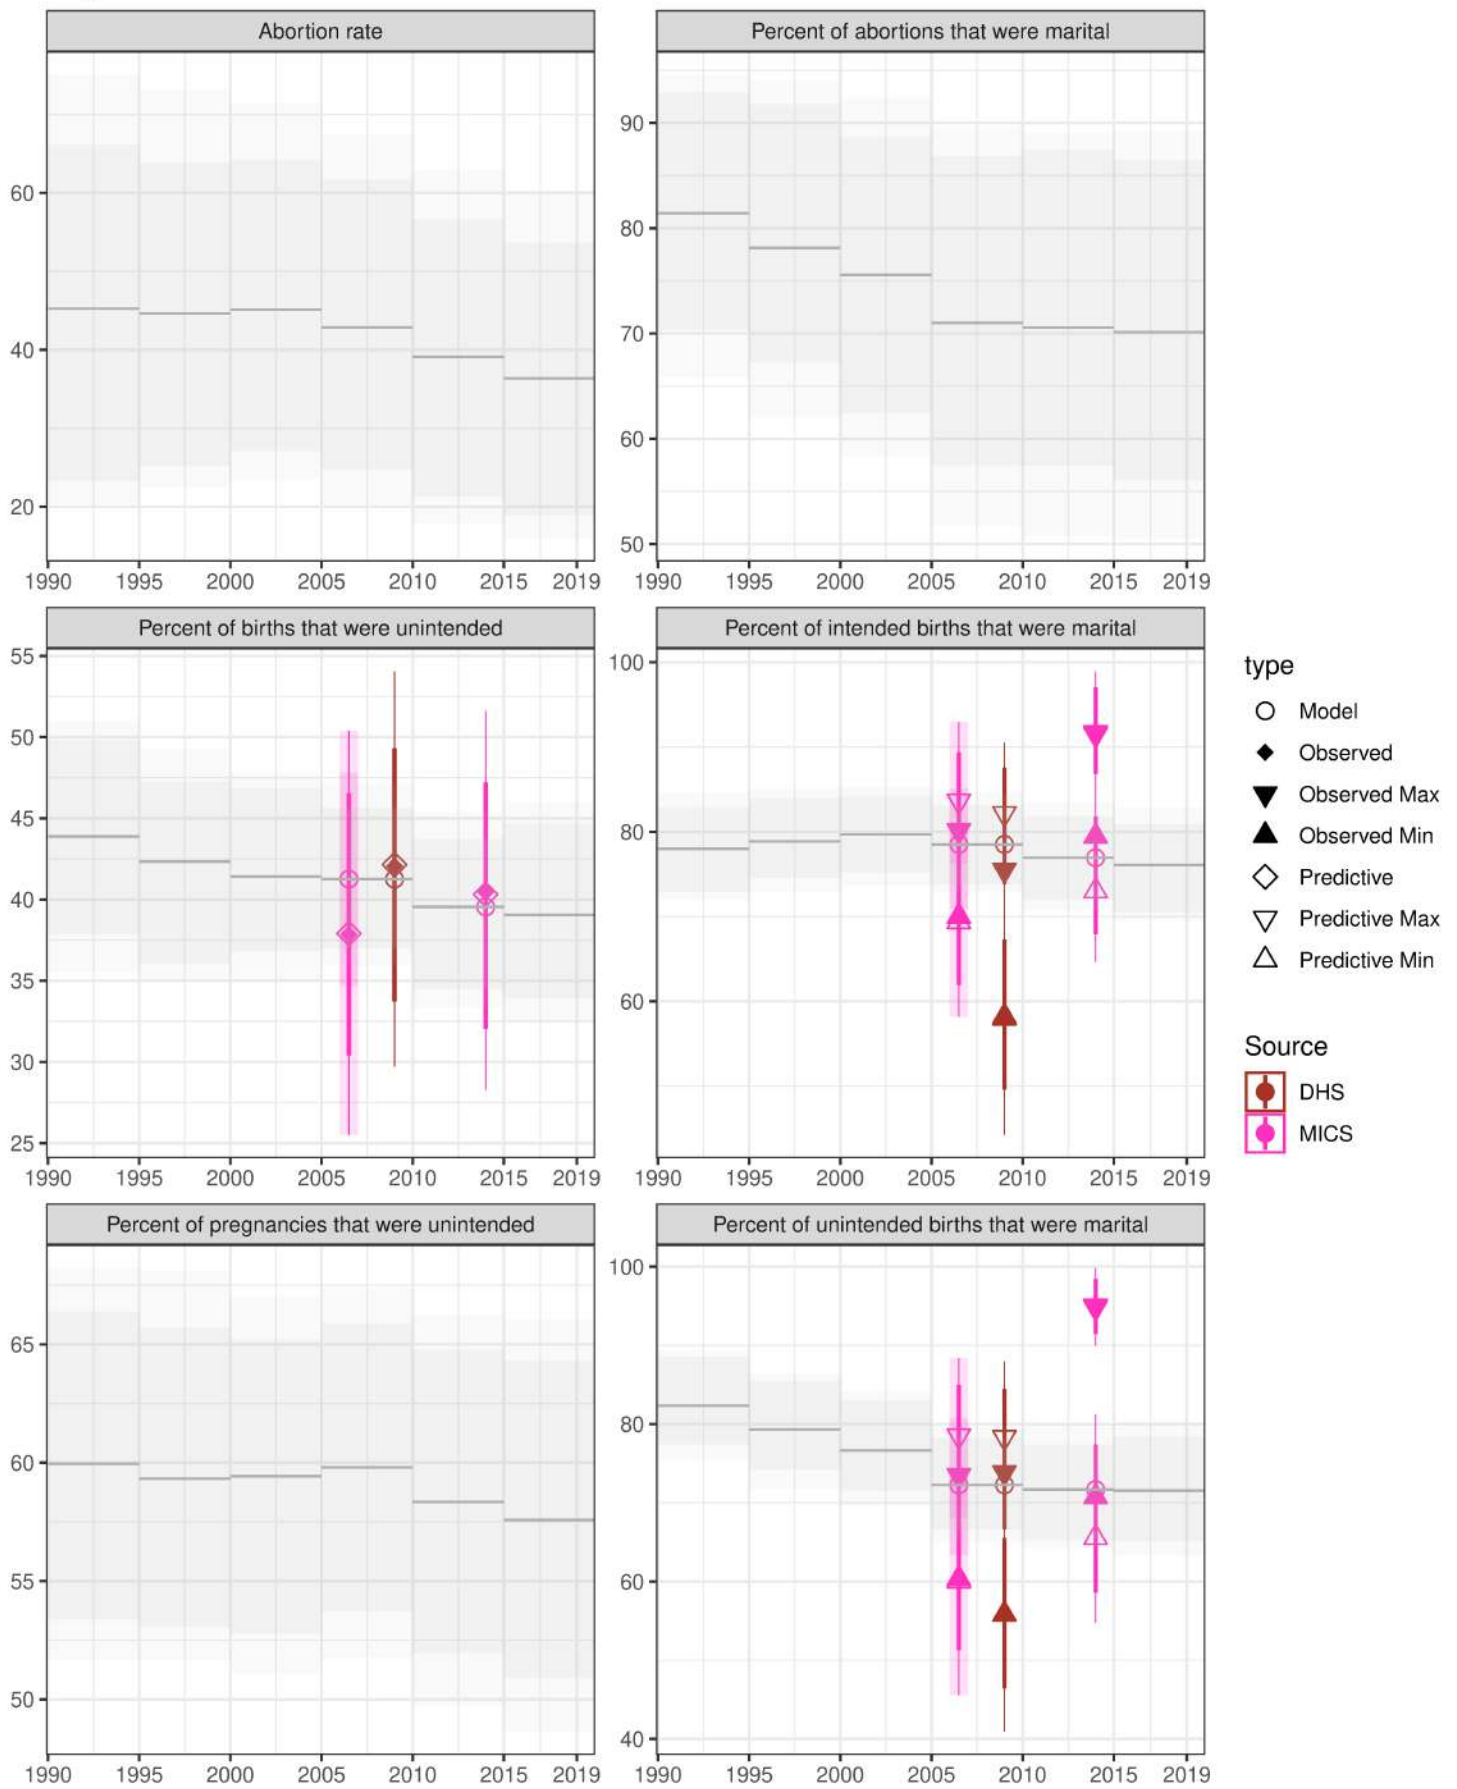

Note: Vertical lines and grey shading show 80% and 95% uncertainty intervals. Color shading shows when data were collected, if more than one year.

### Paraguay

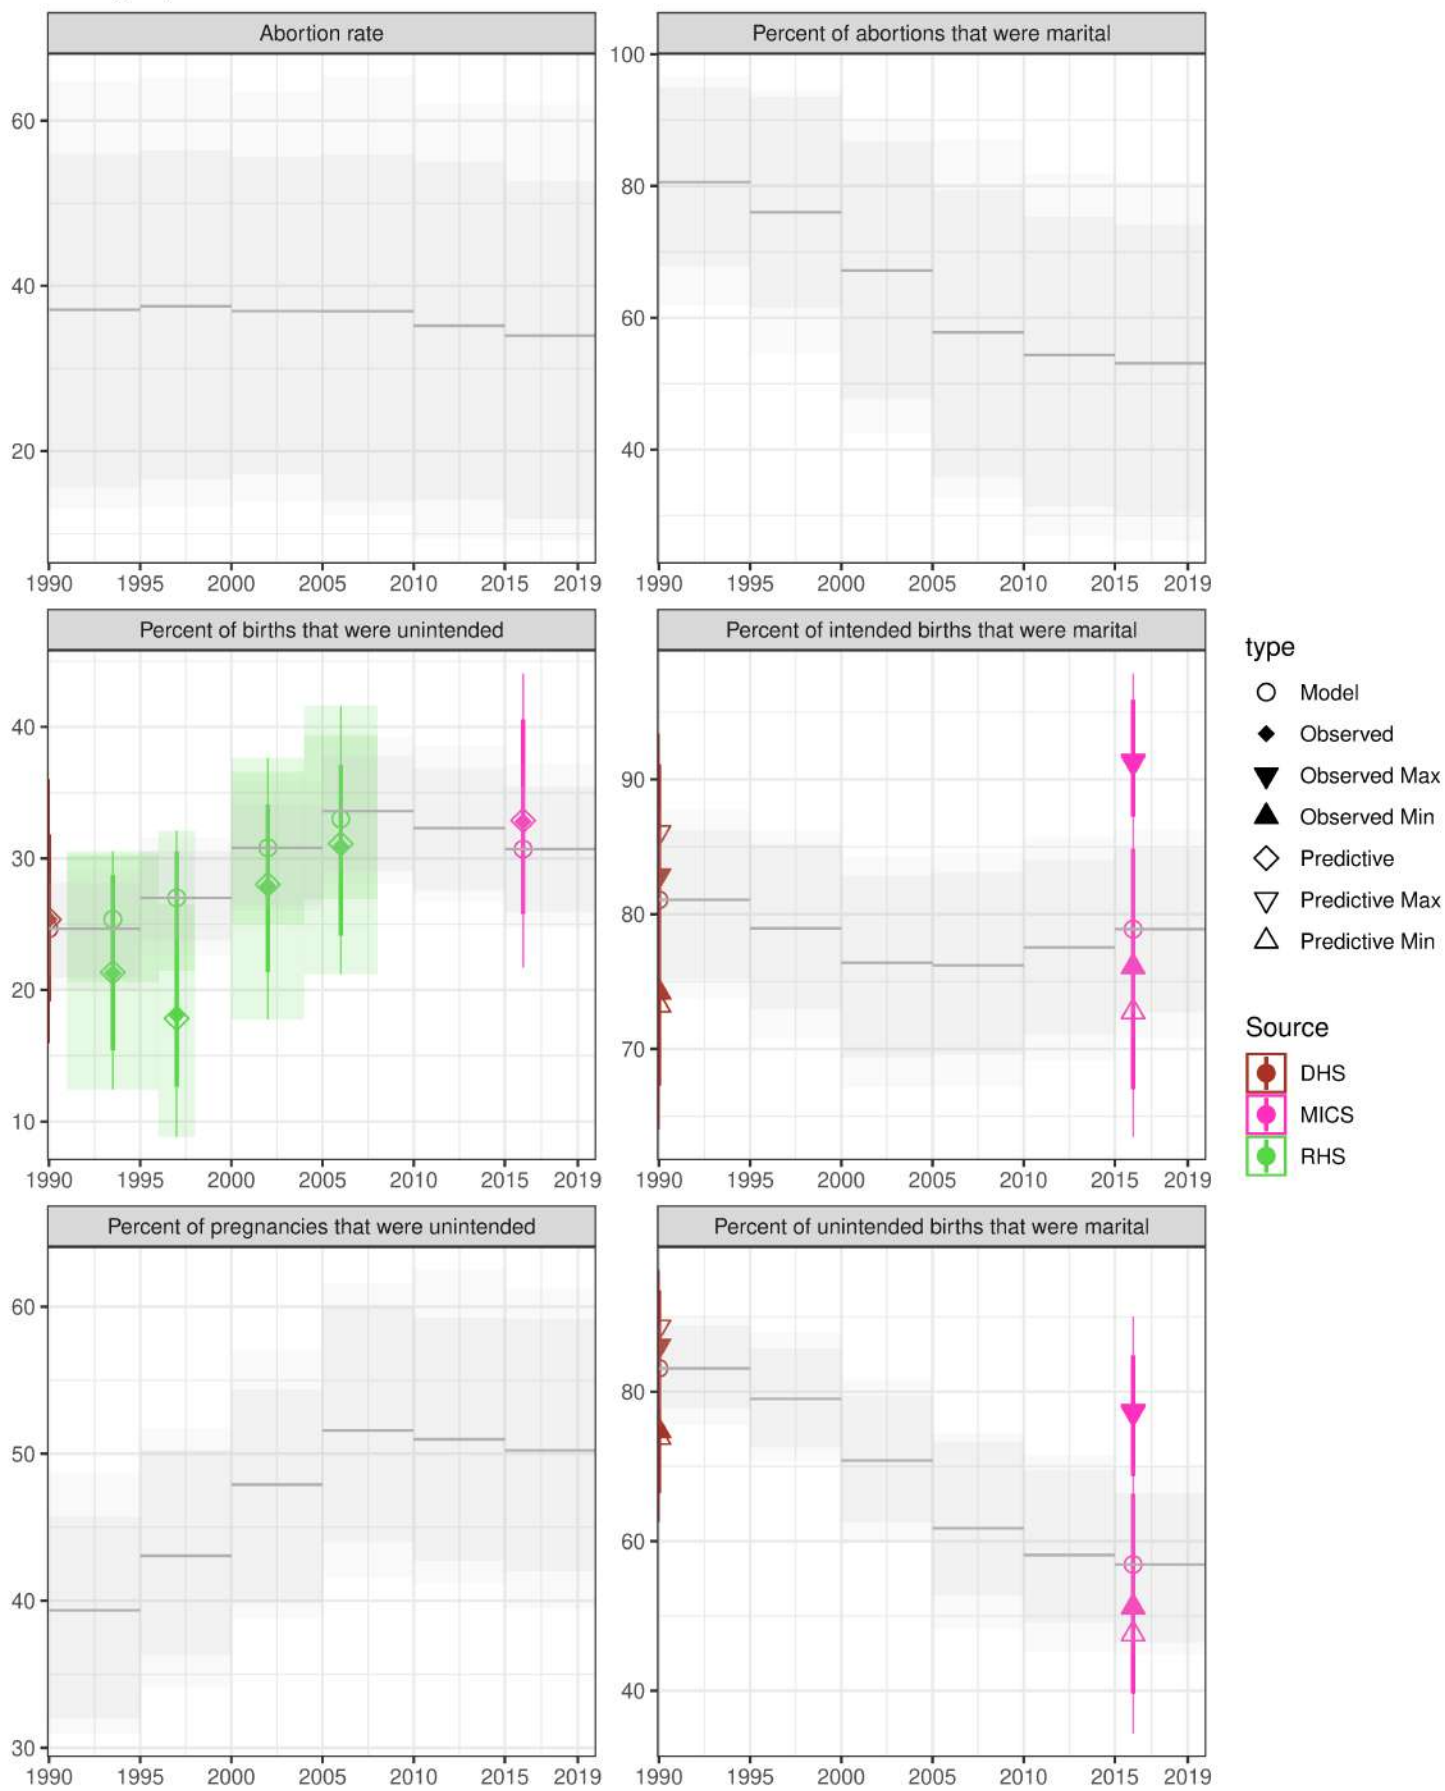

Note: Vertical lines and grey shading show 80% and 95% uncertainty intervals. Color shading shows when data were collected, if more than one year.

Peru

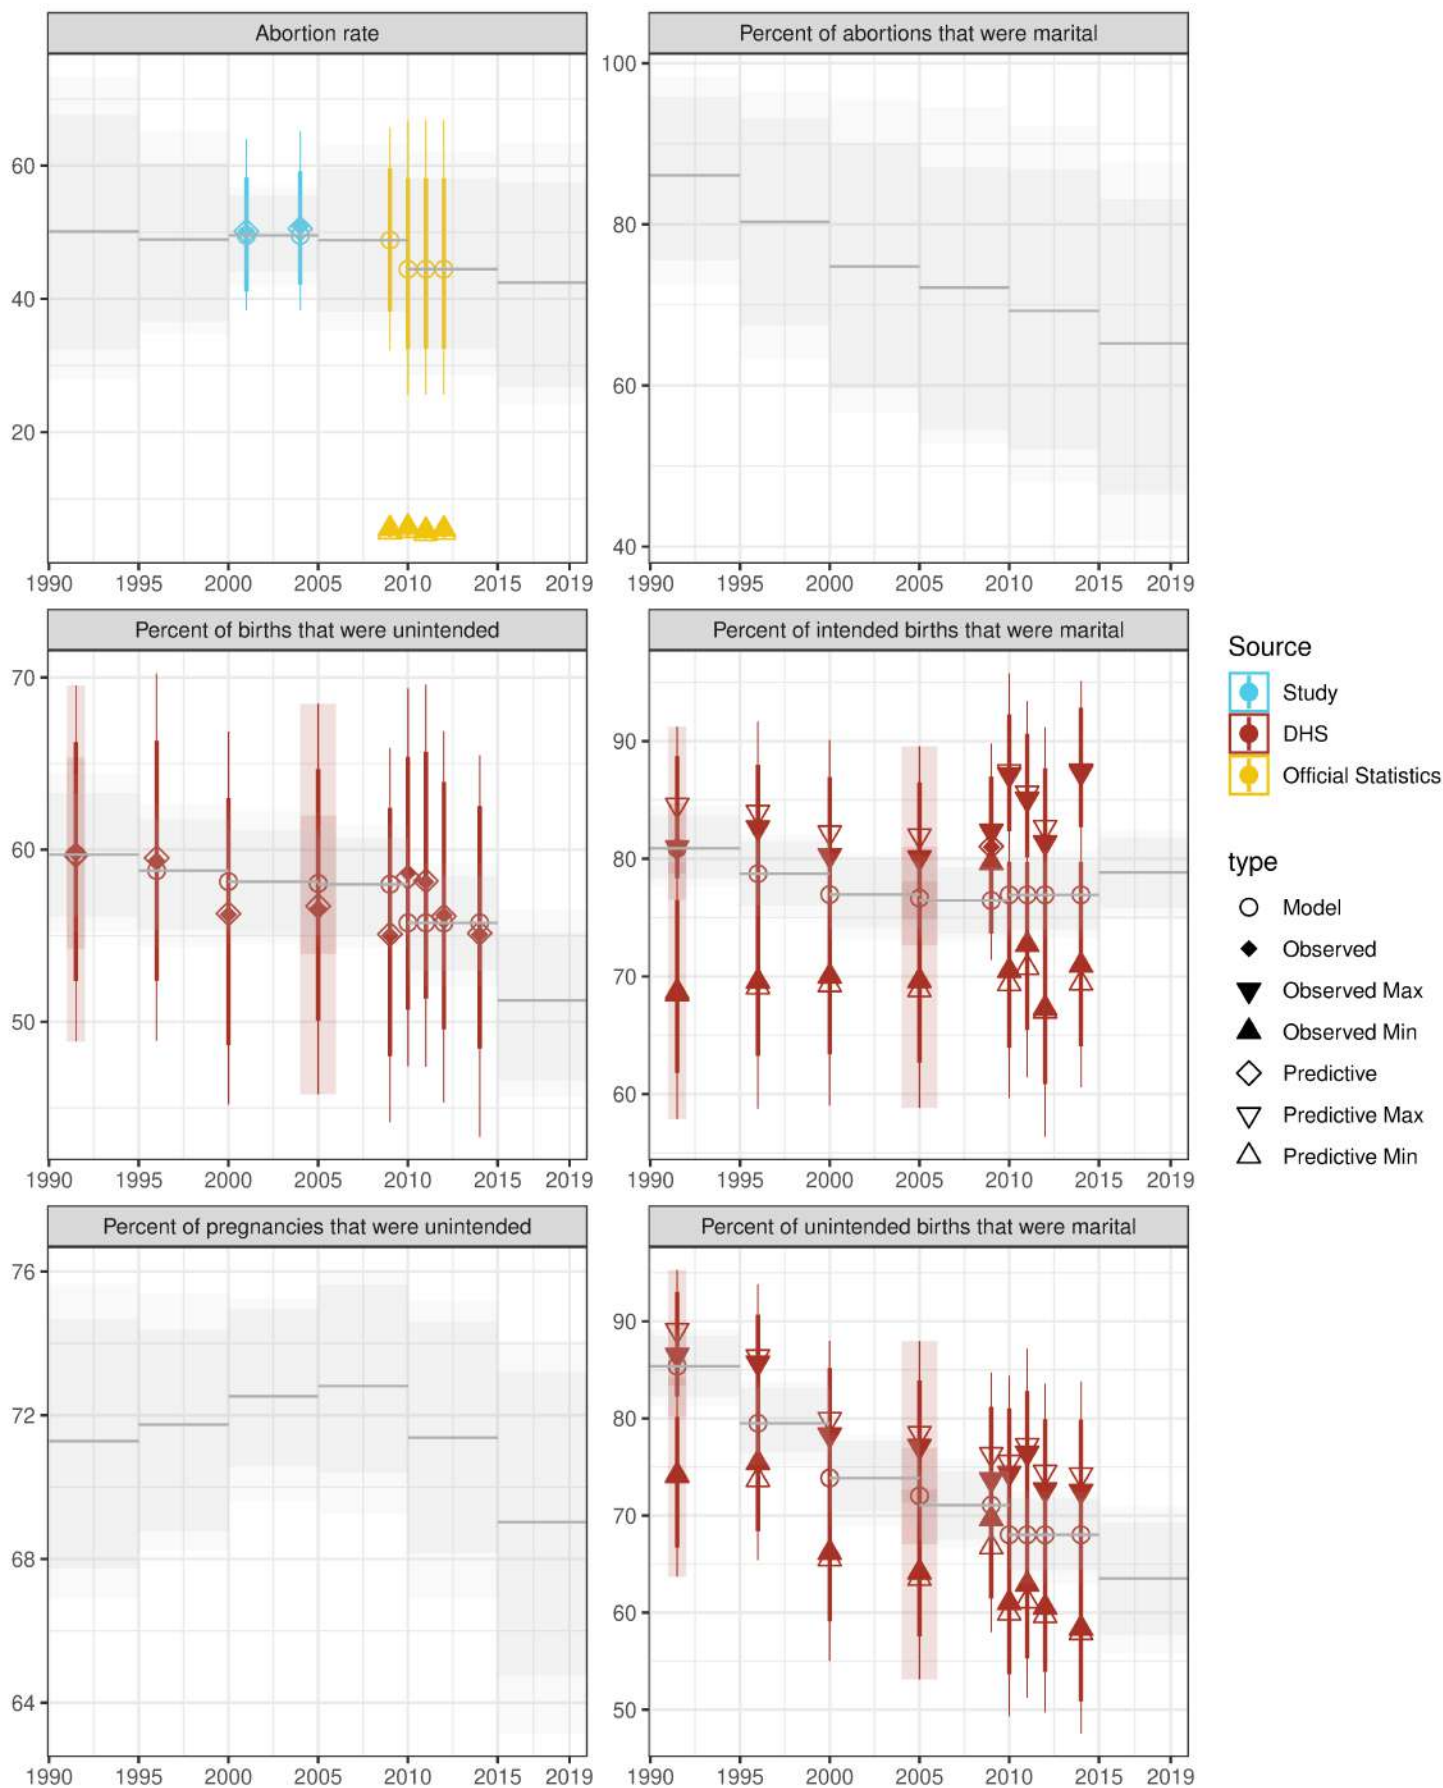

Note: Vertical lines and grey shading show 80% and 95% uncertainty intervals. Color shading shows when data were collected, if more than one year.

### Suriname

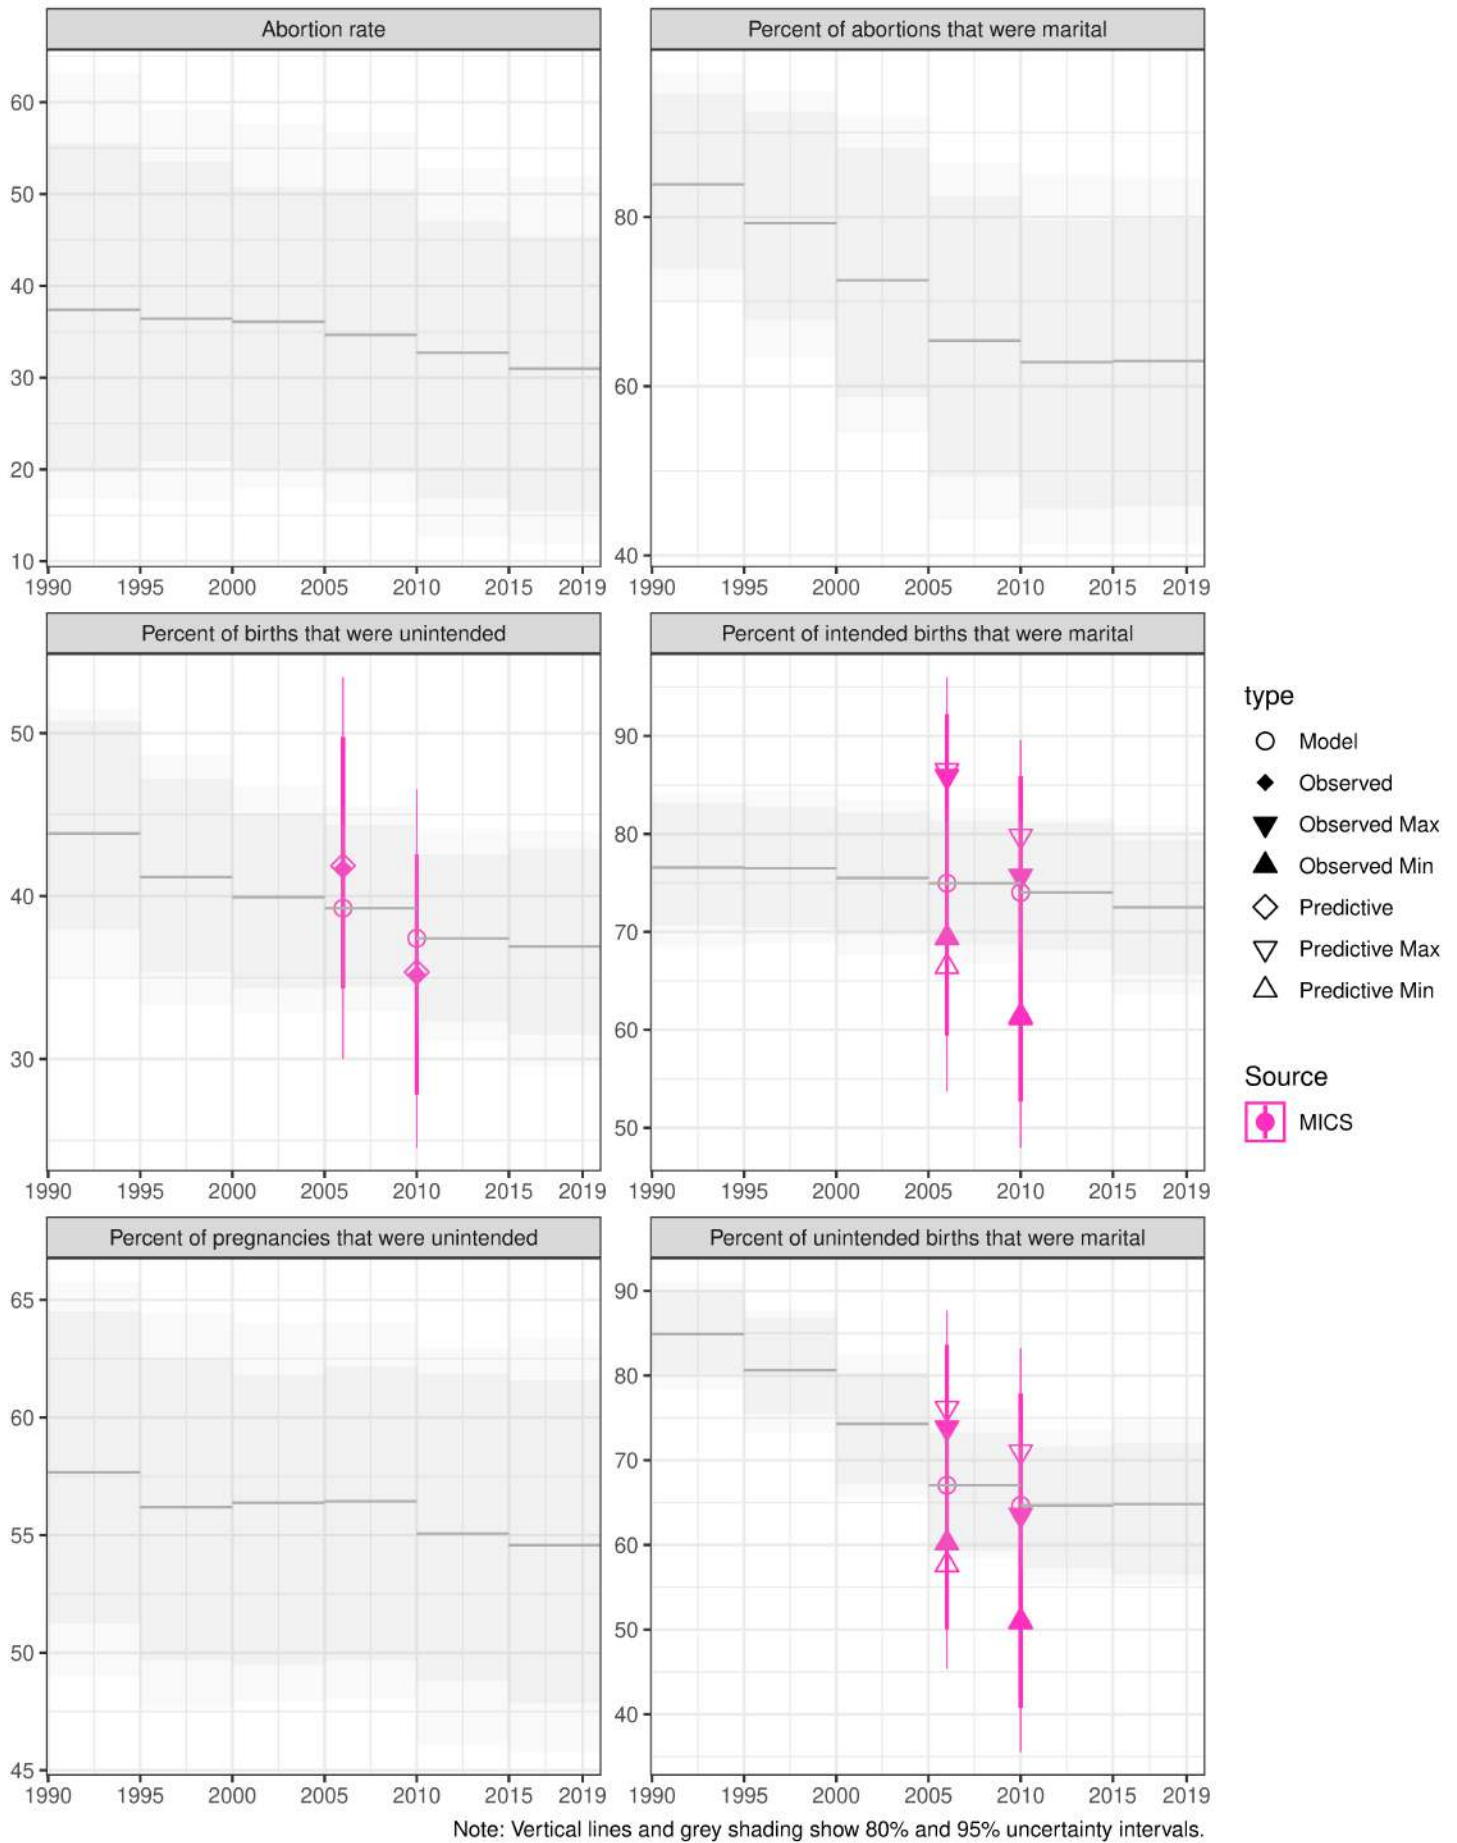

# Uruguay

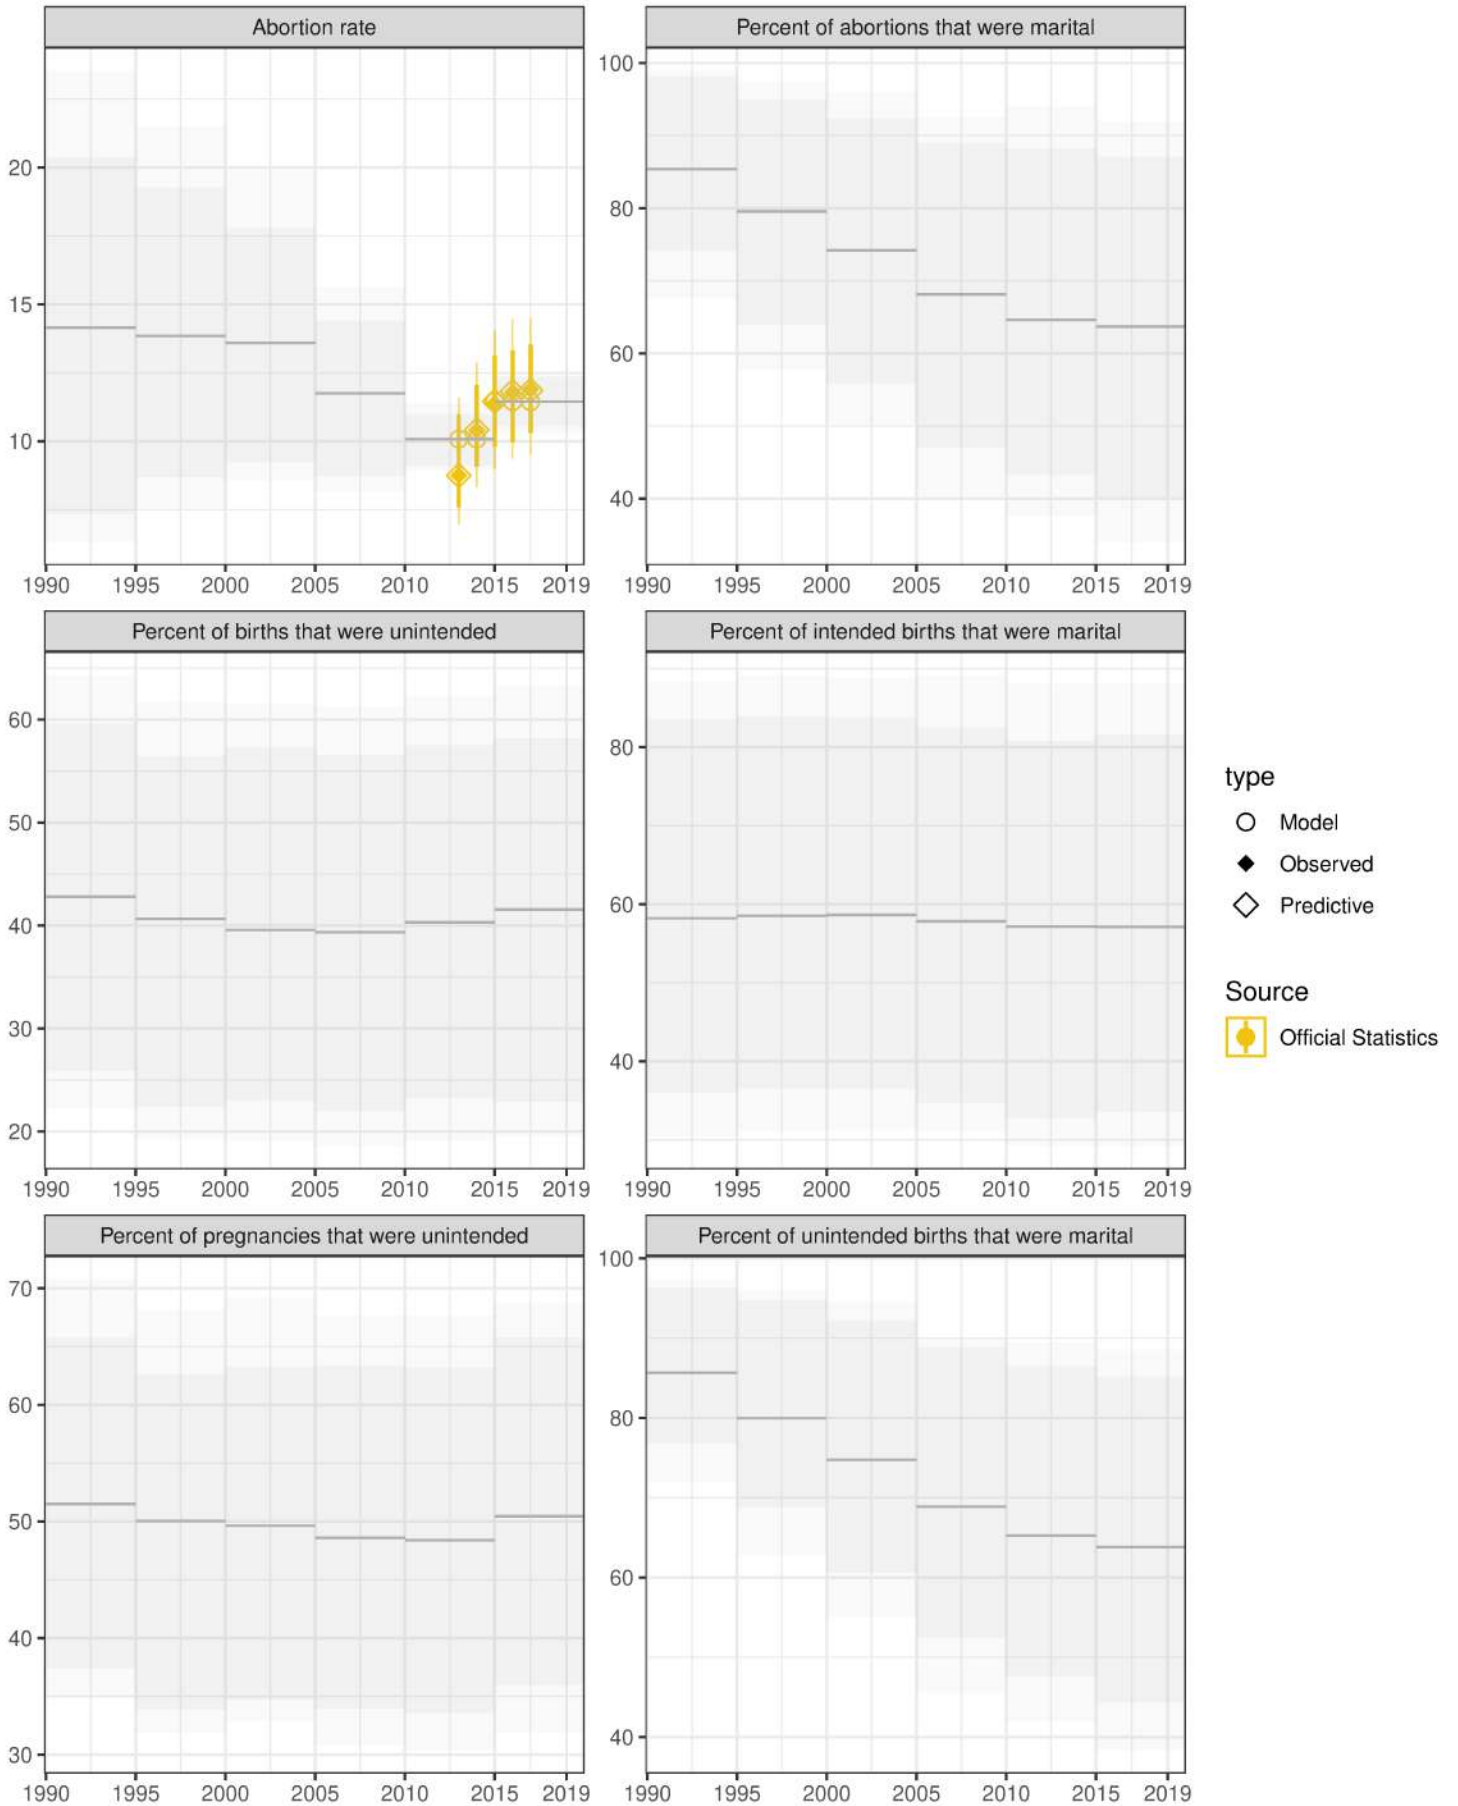

Note: Vertical lines and grey shading show 80% and 95% uncertainty intervals.

## 5.2 Central America

### Belize

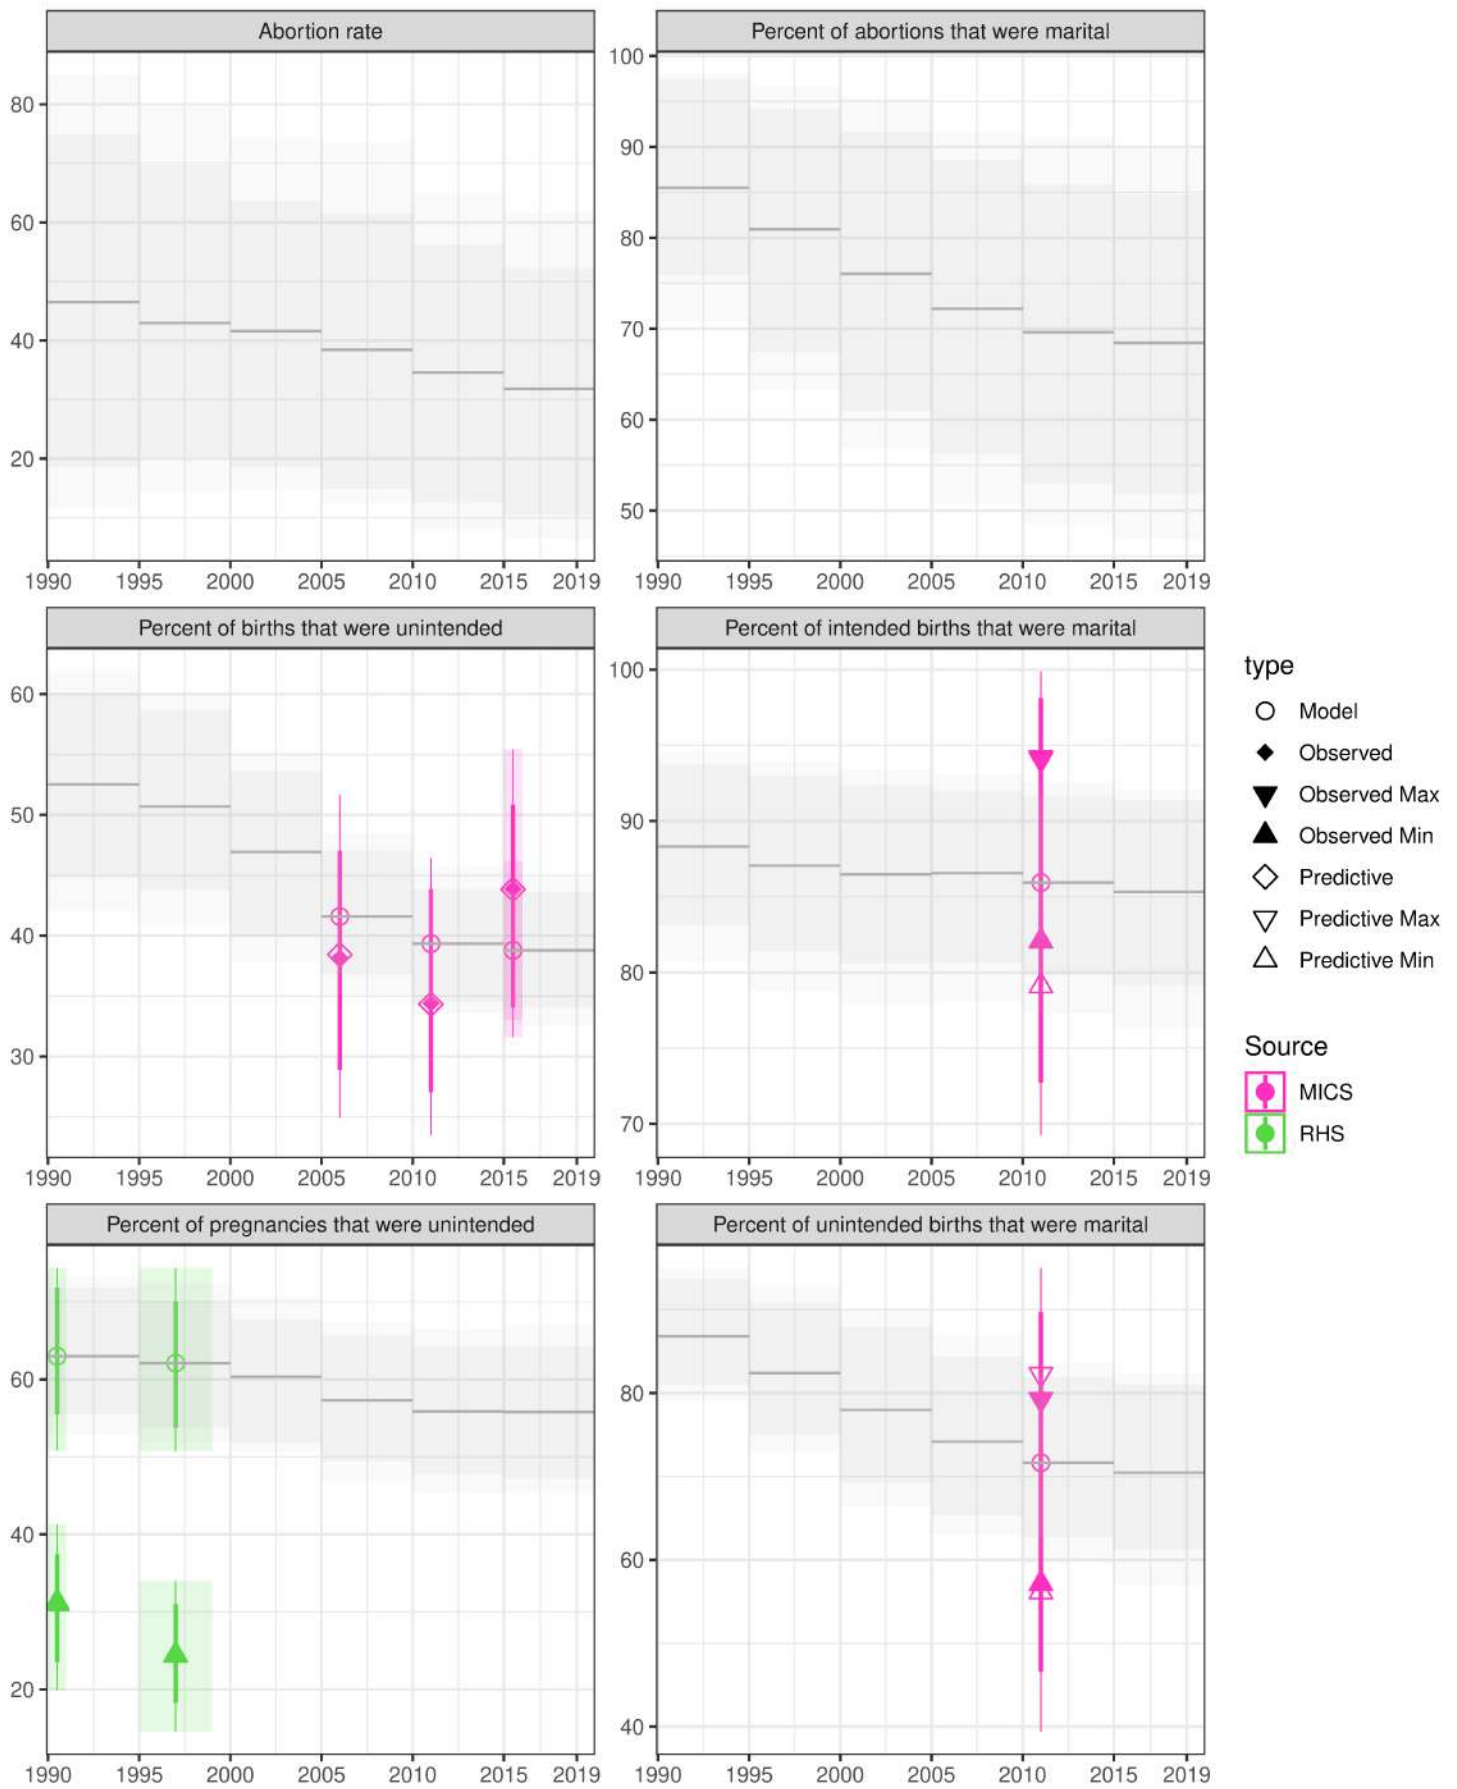

Note: Vertical lines and grey shading show 80% and 95% uncertainty intervals. Color shading shows when data were collected, if more than one year.



### Costa Rica

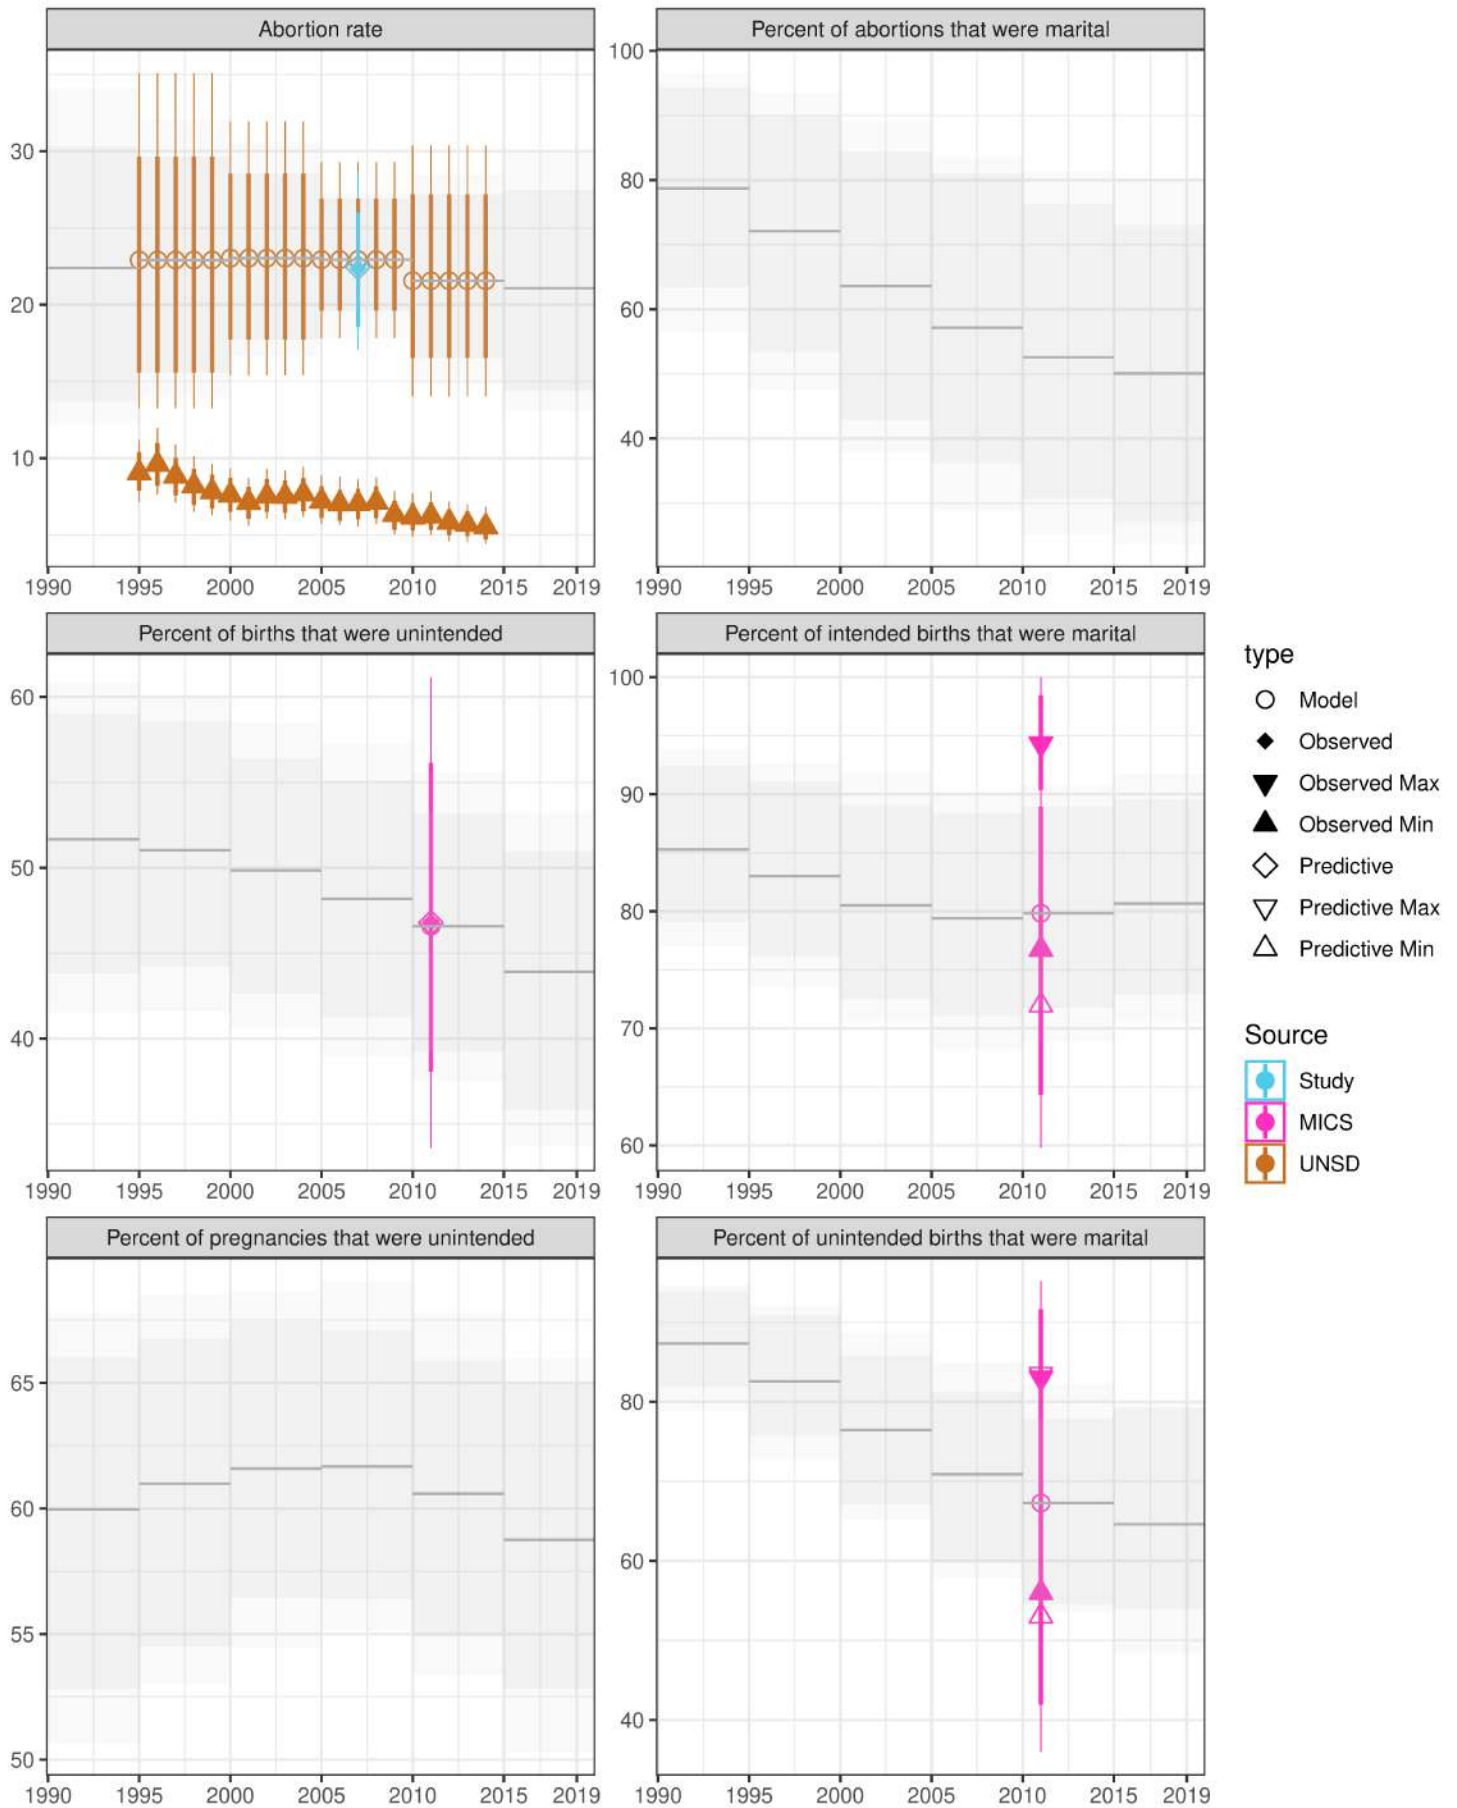

Note: Vertical lines and grey shading show 80% and 95% uncertainty intervals.

### El Salvador

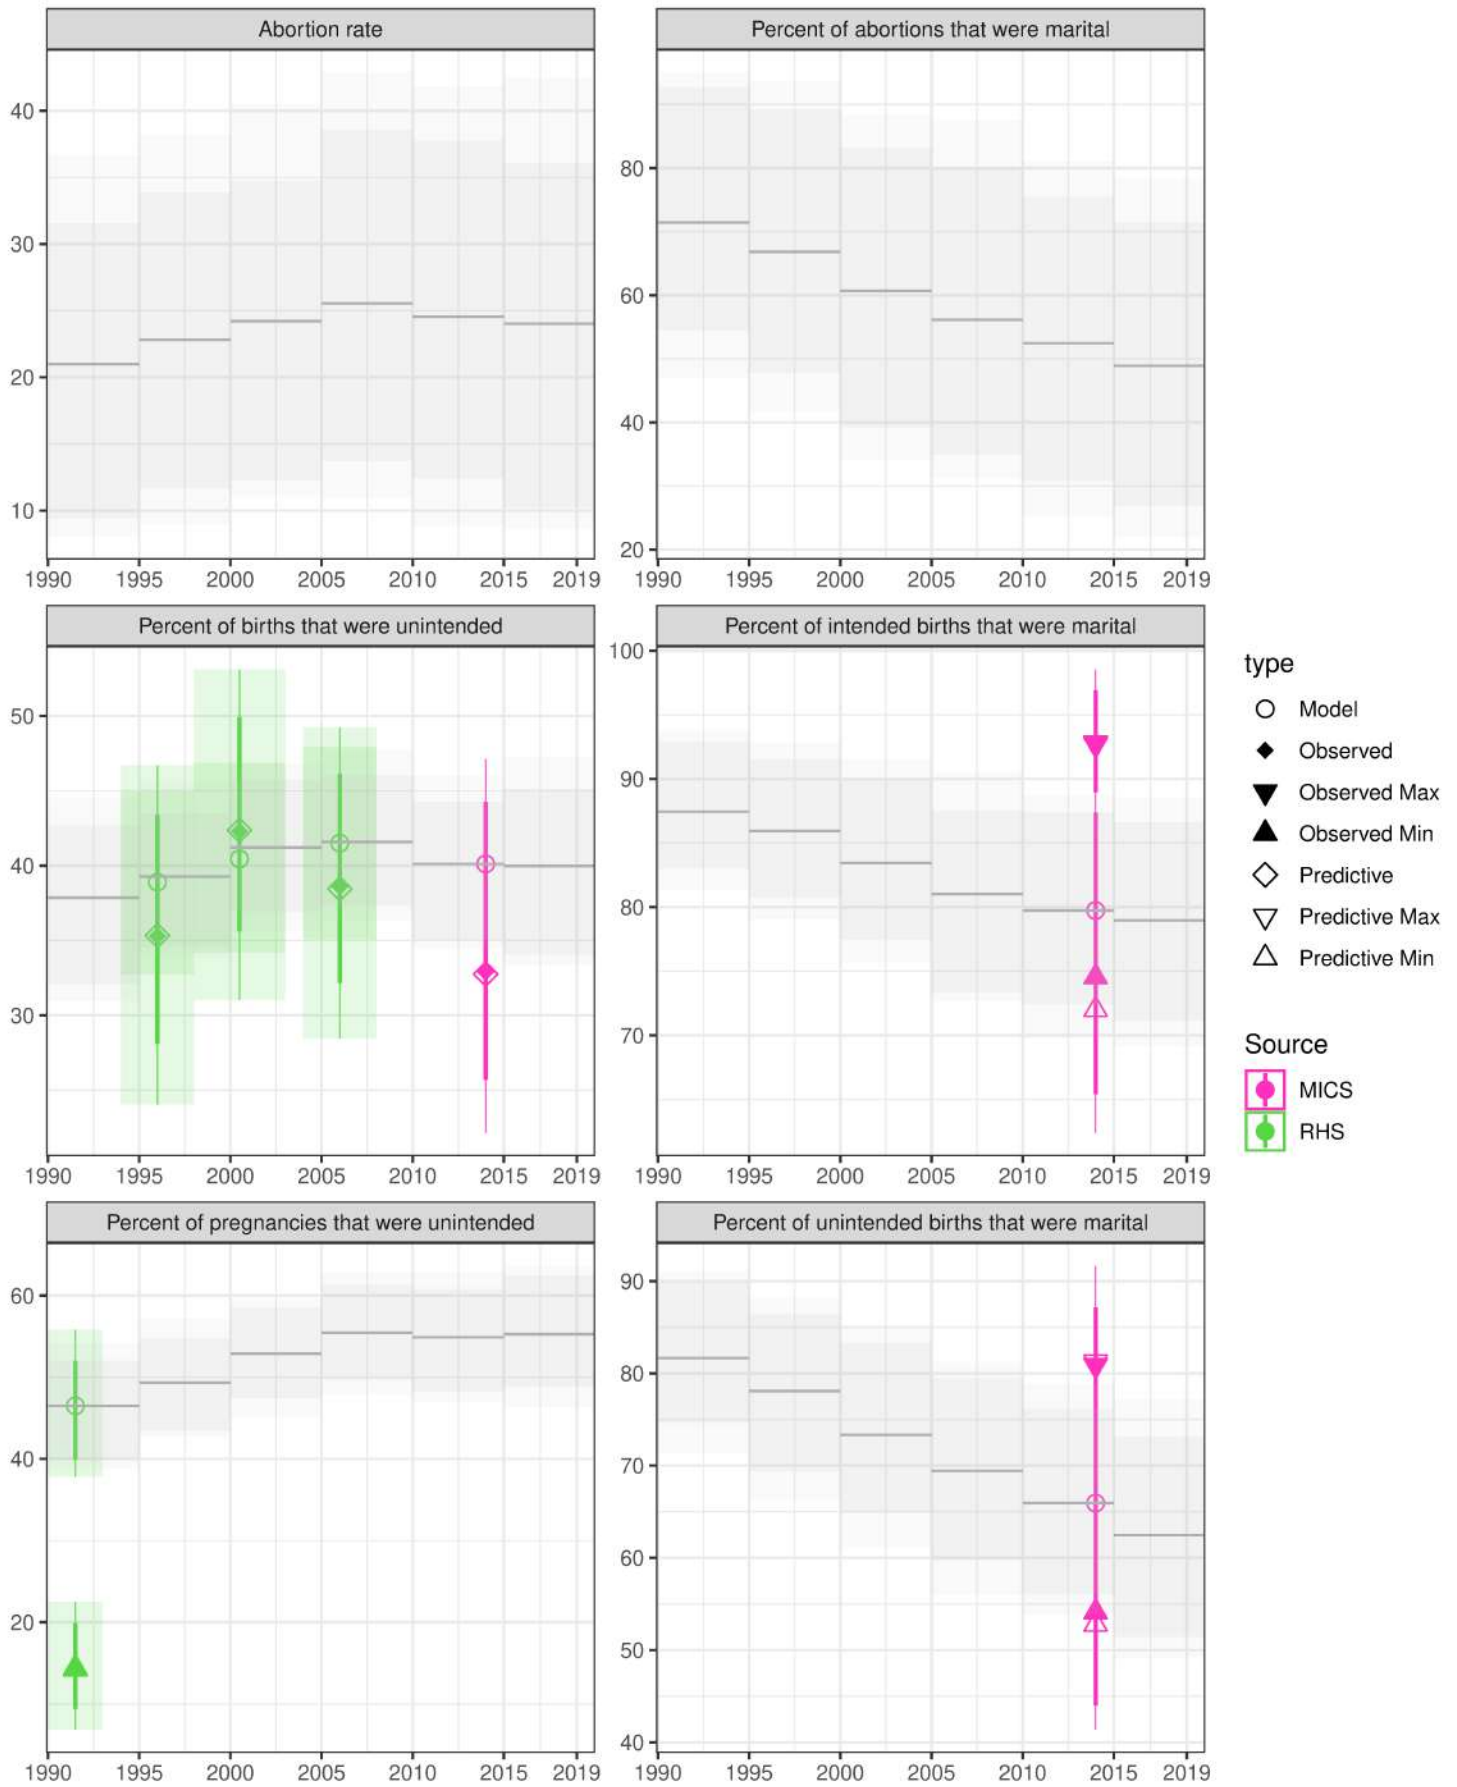

Note: Vertical lines and grey shading show 80% and 95% uncertainty intervals. Color shading shows when data were collected, if more than one year.

### Guatemala

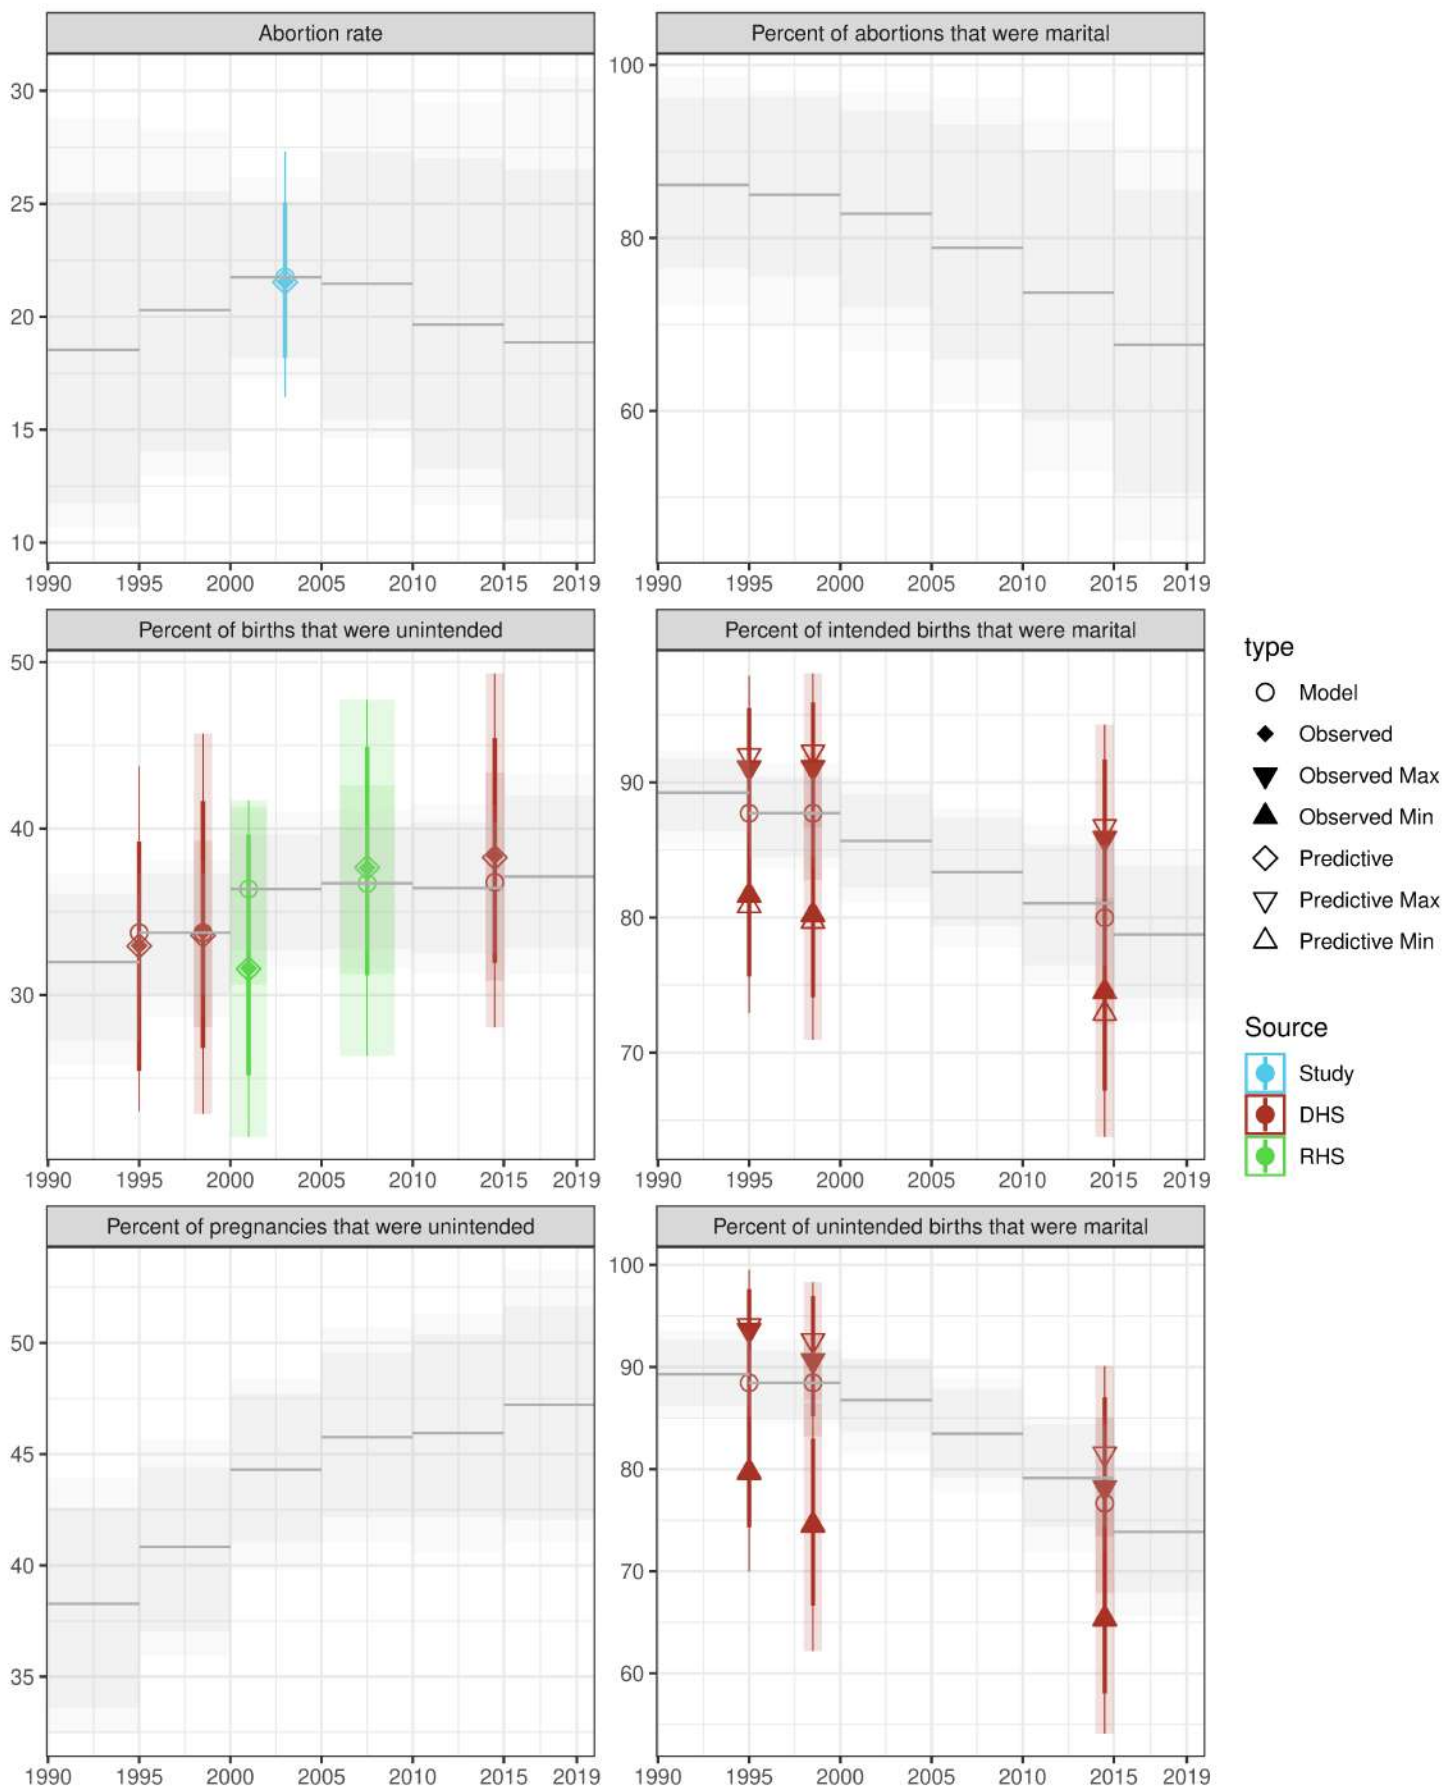

Note: Vertical lines and grey shading show 80% and 95% uncertainty intervals. Color shading shows when data were collected, if more than one year.

### Honduras

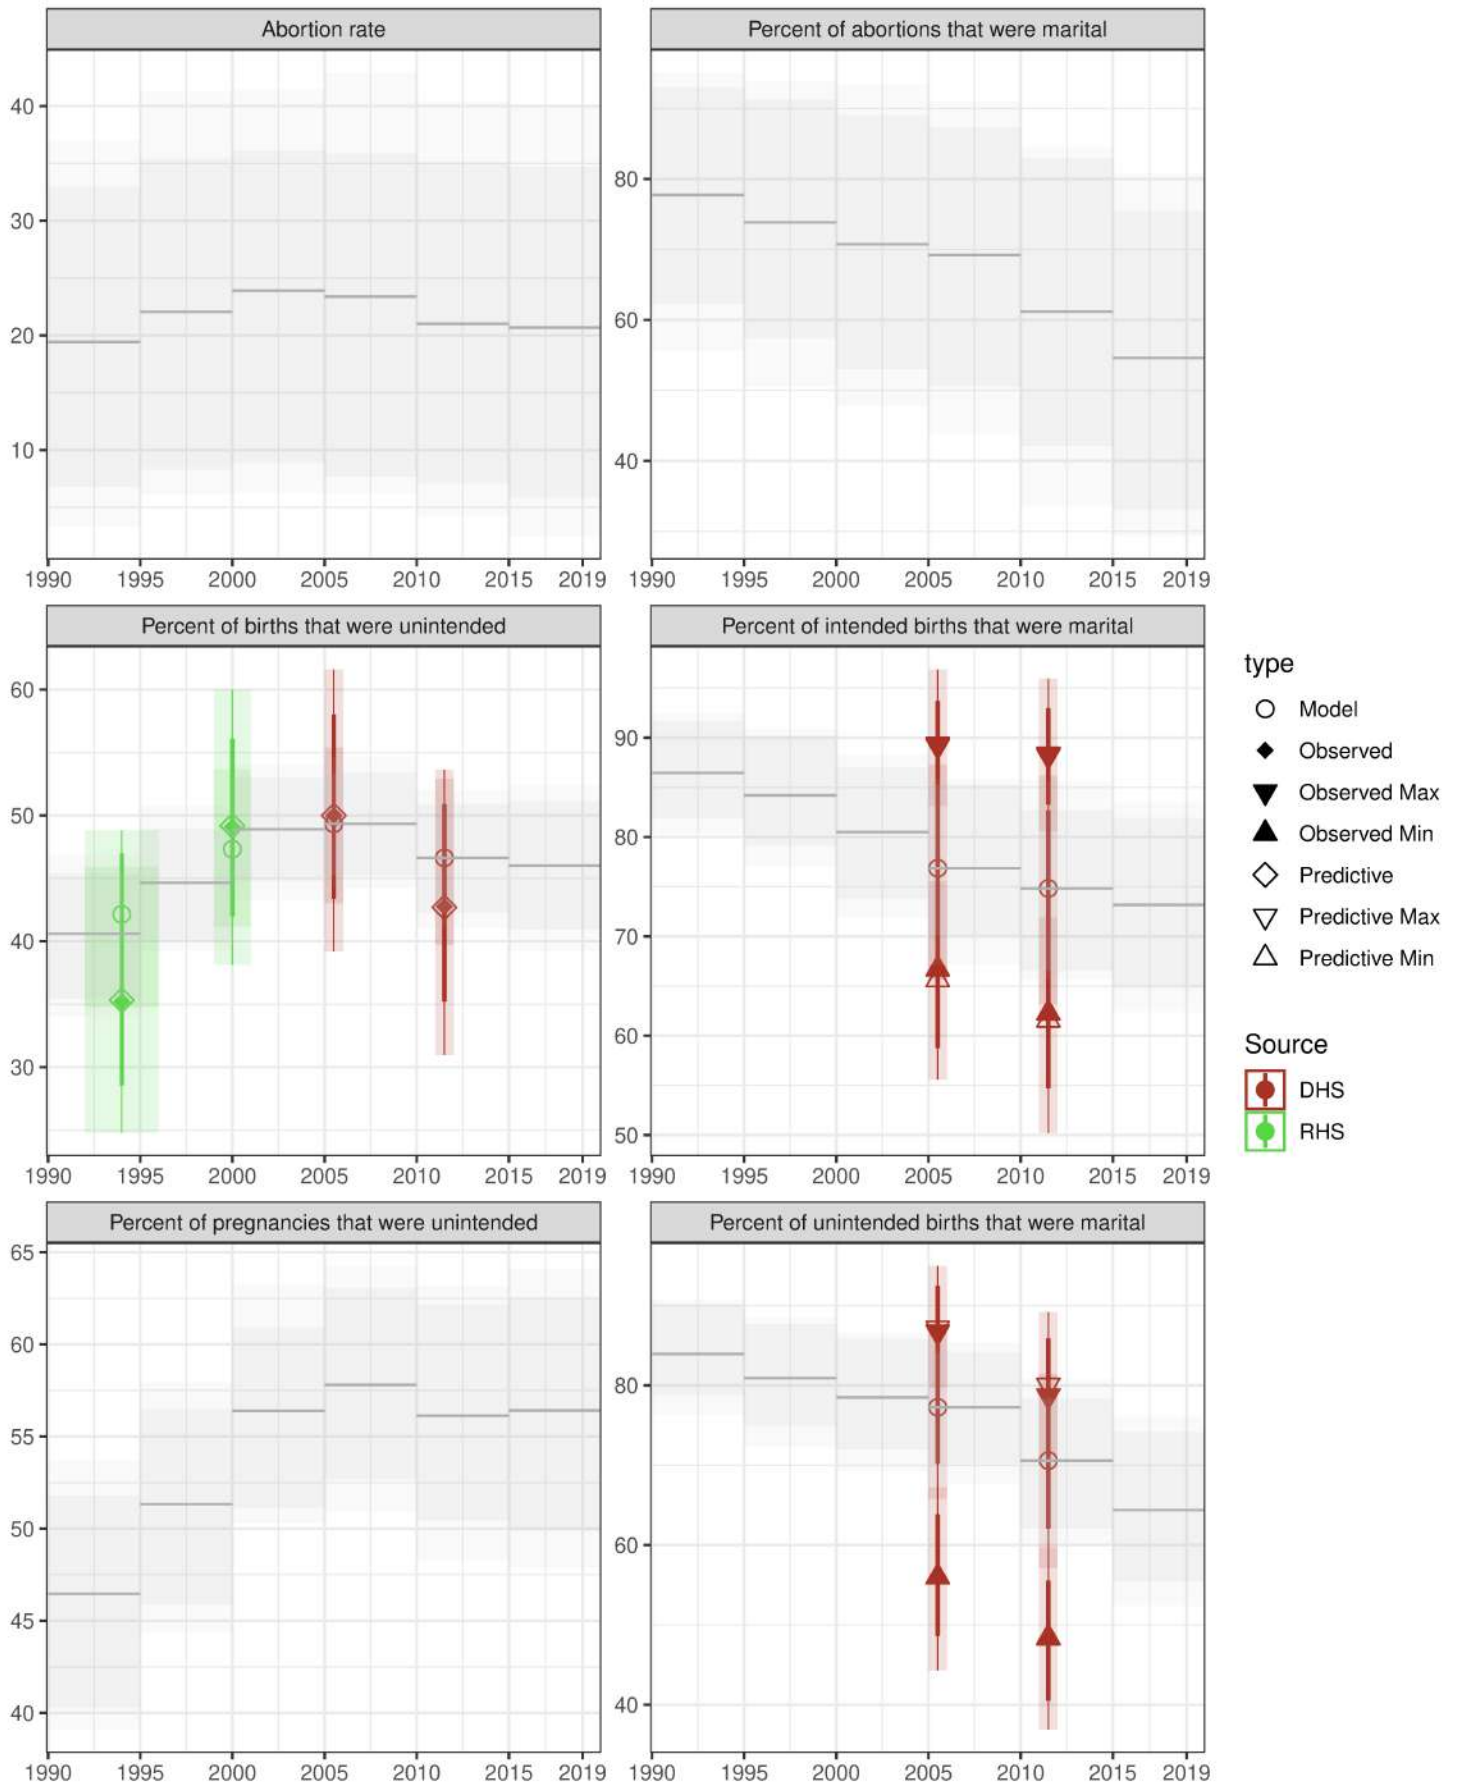

Note: Vertical lines and grey shading show 80% and 95% uncertainty intervals. Color shading shows when data were collected, if more than one year.

### Mexico

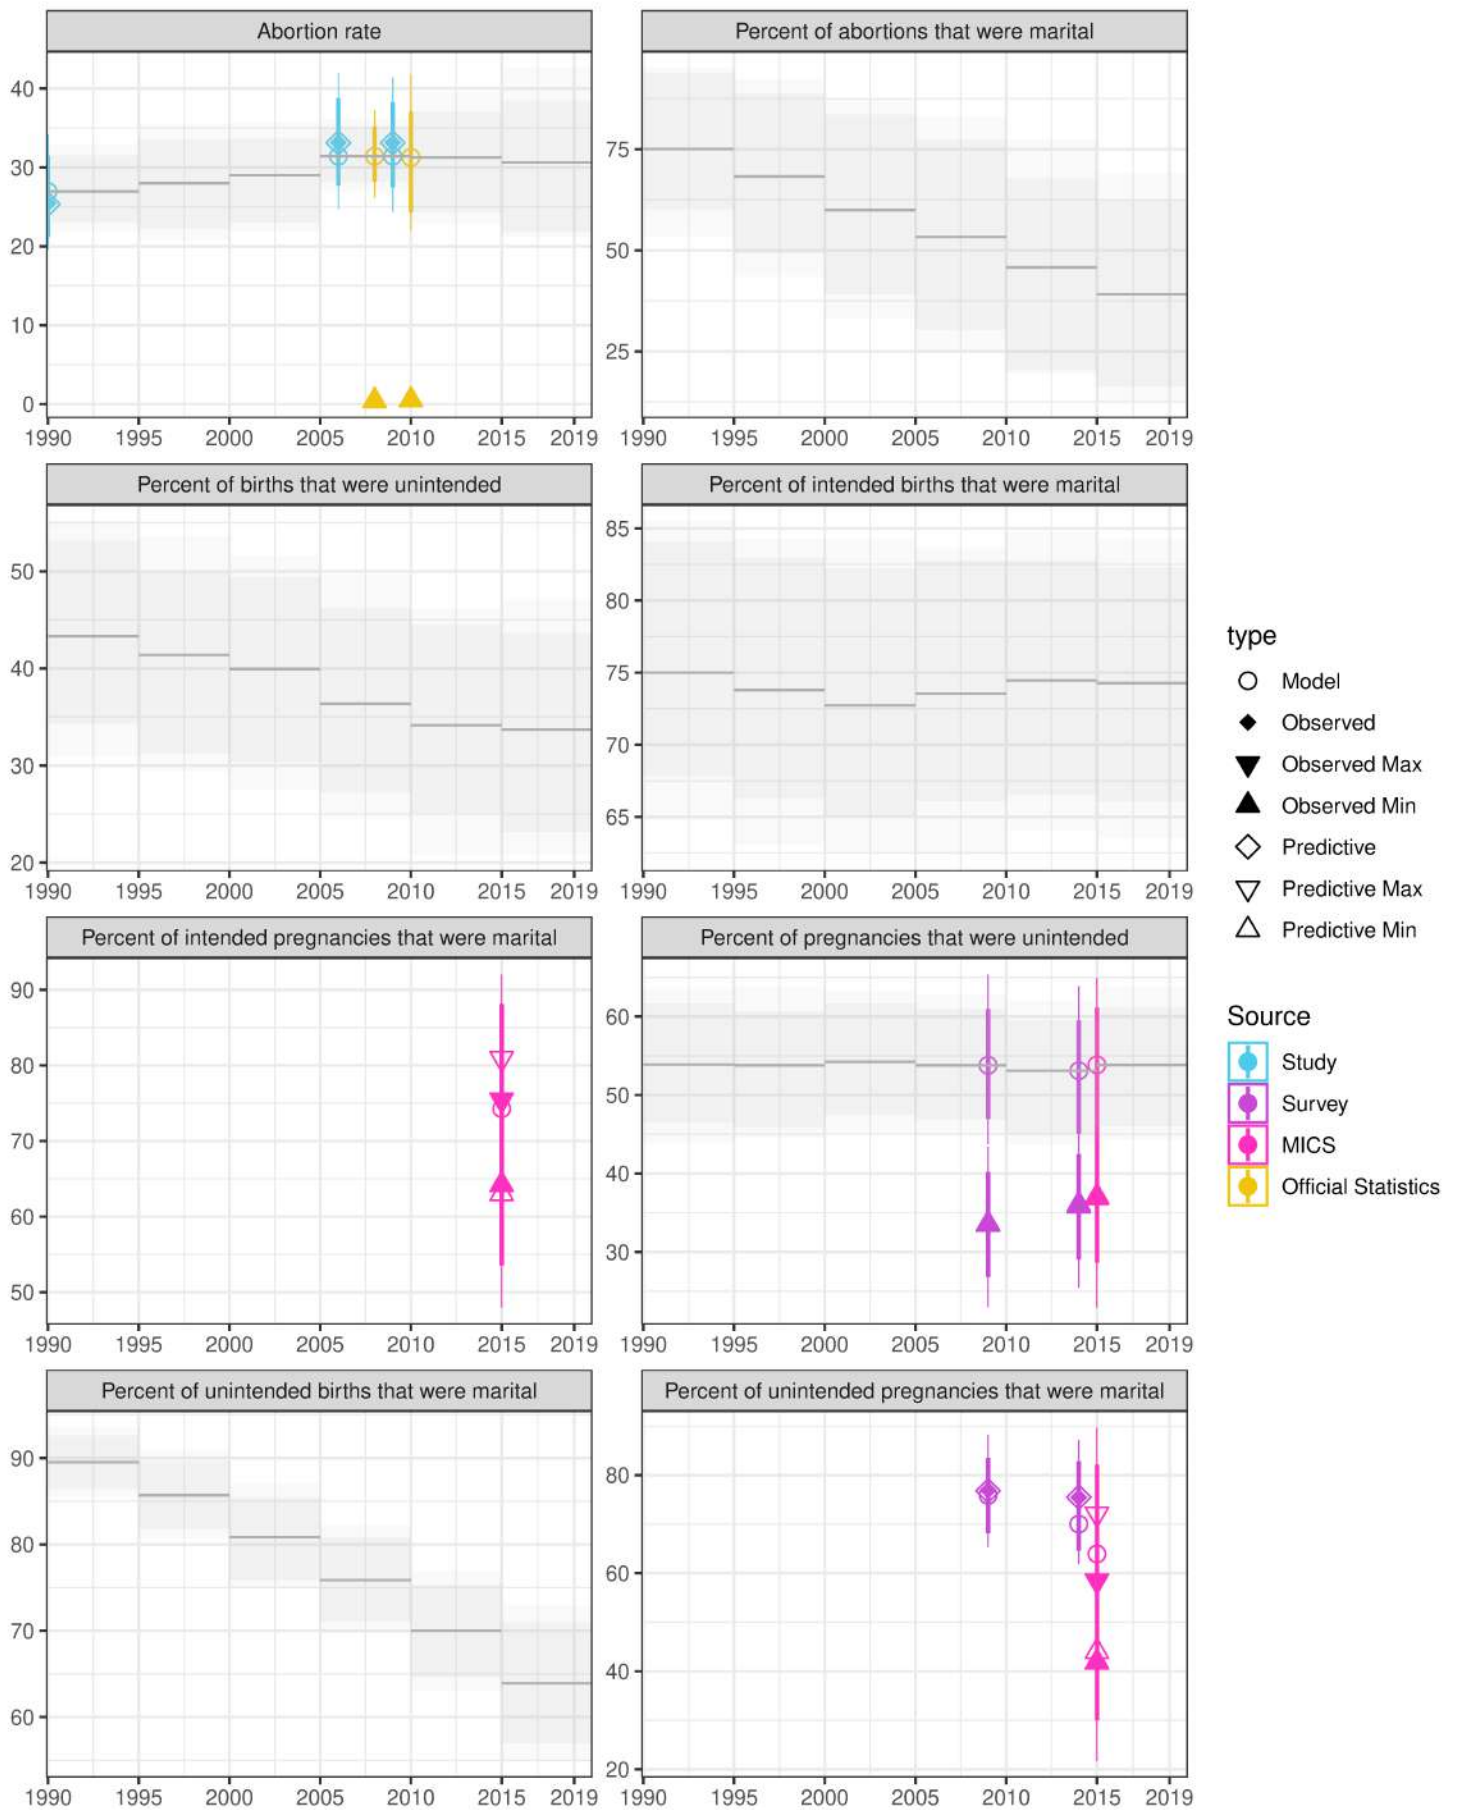

### Nicaragua

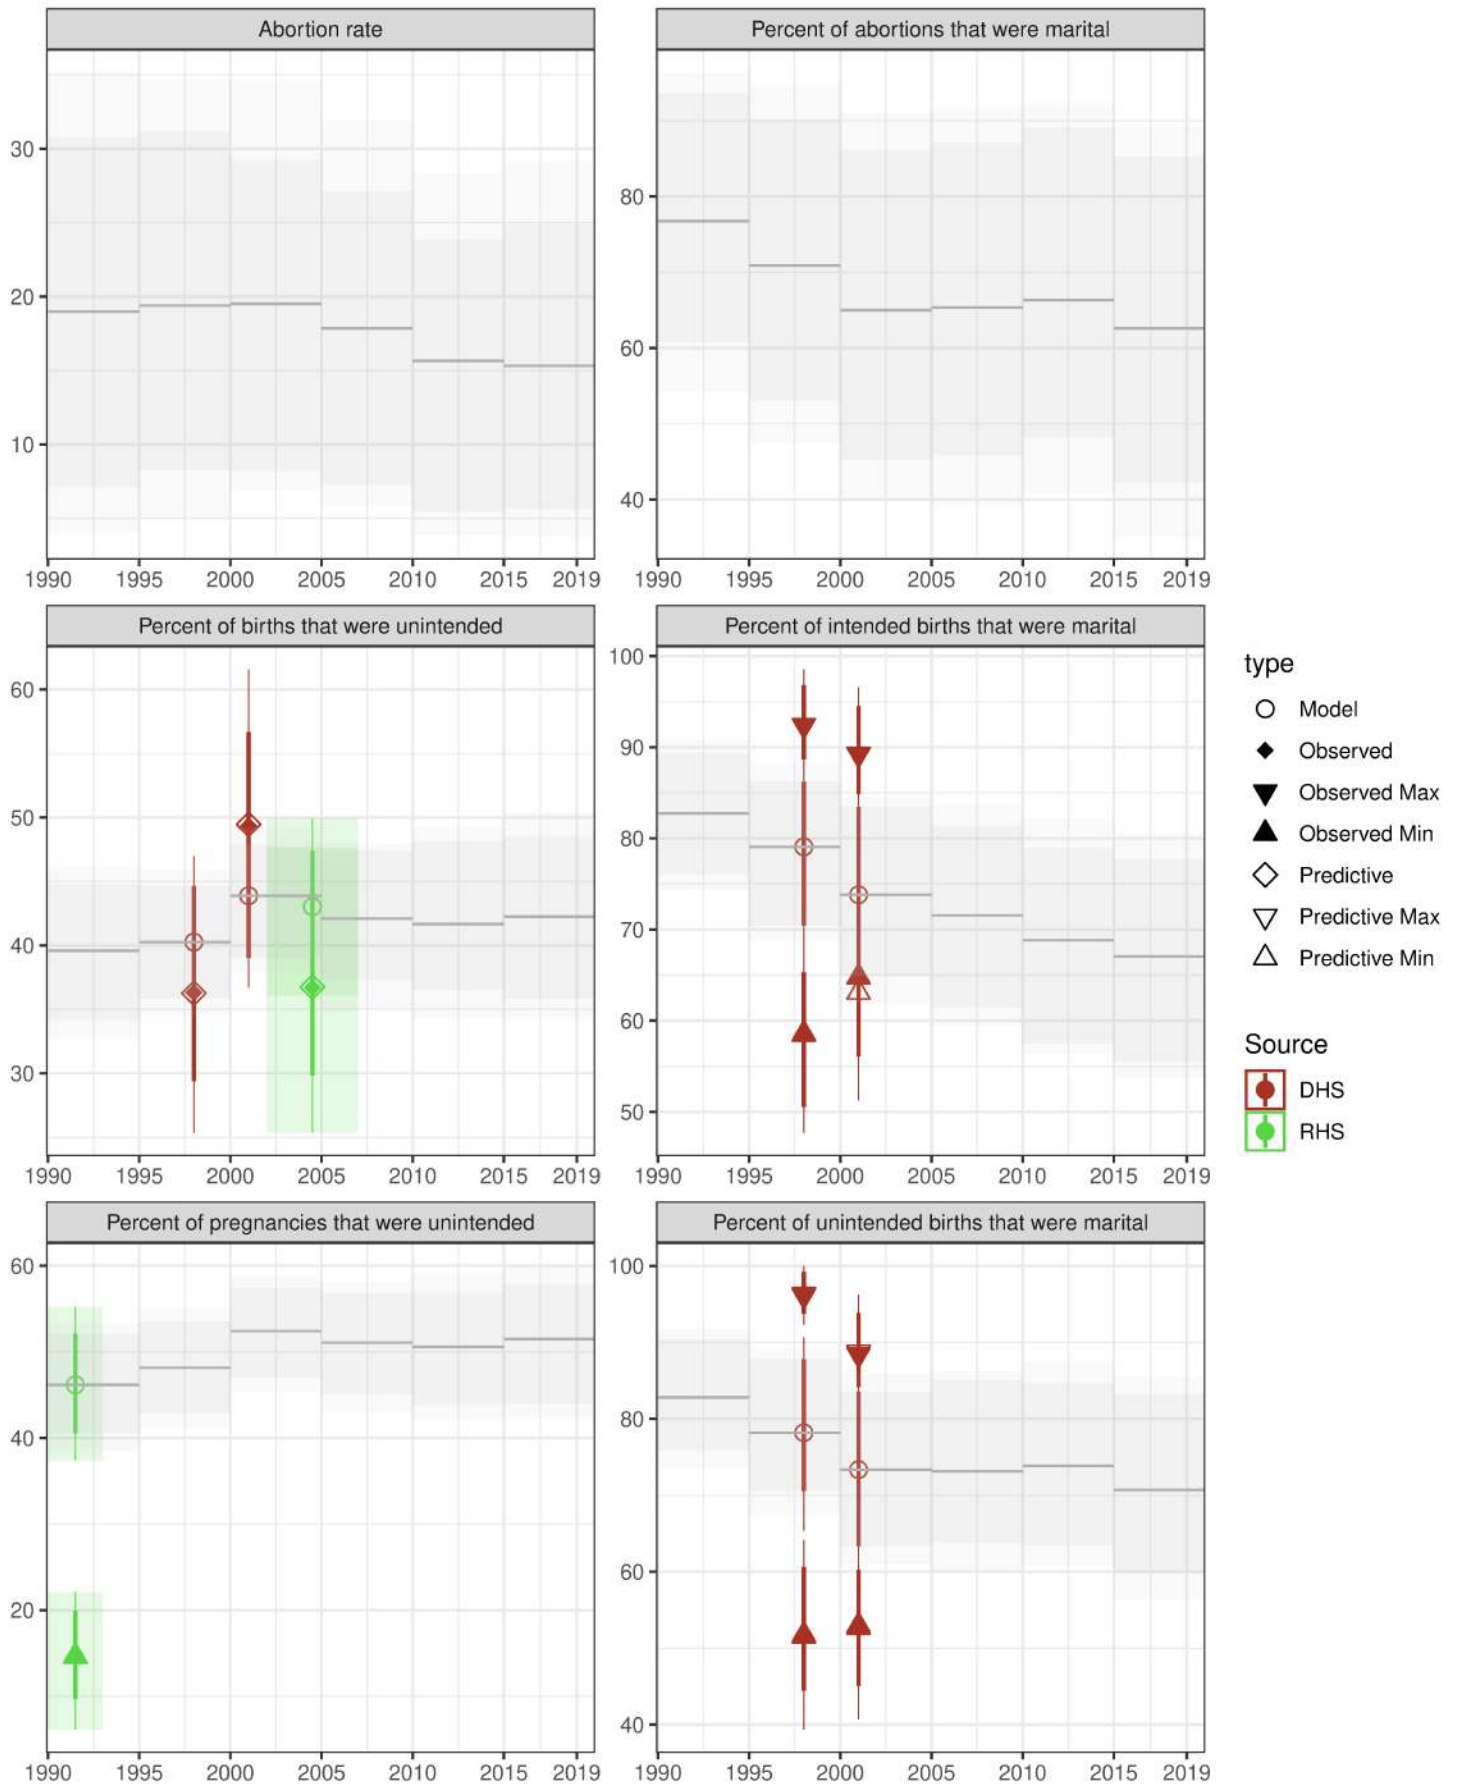

Note: Vertical lines and grey shading show 80% and 95% uncertainty intervals. Color shading shows when data were collected, if more than one year.

### Panama

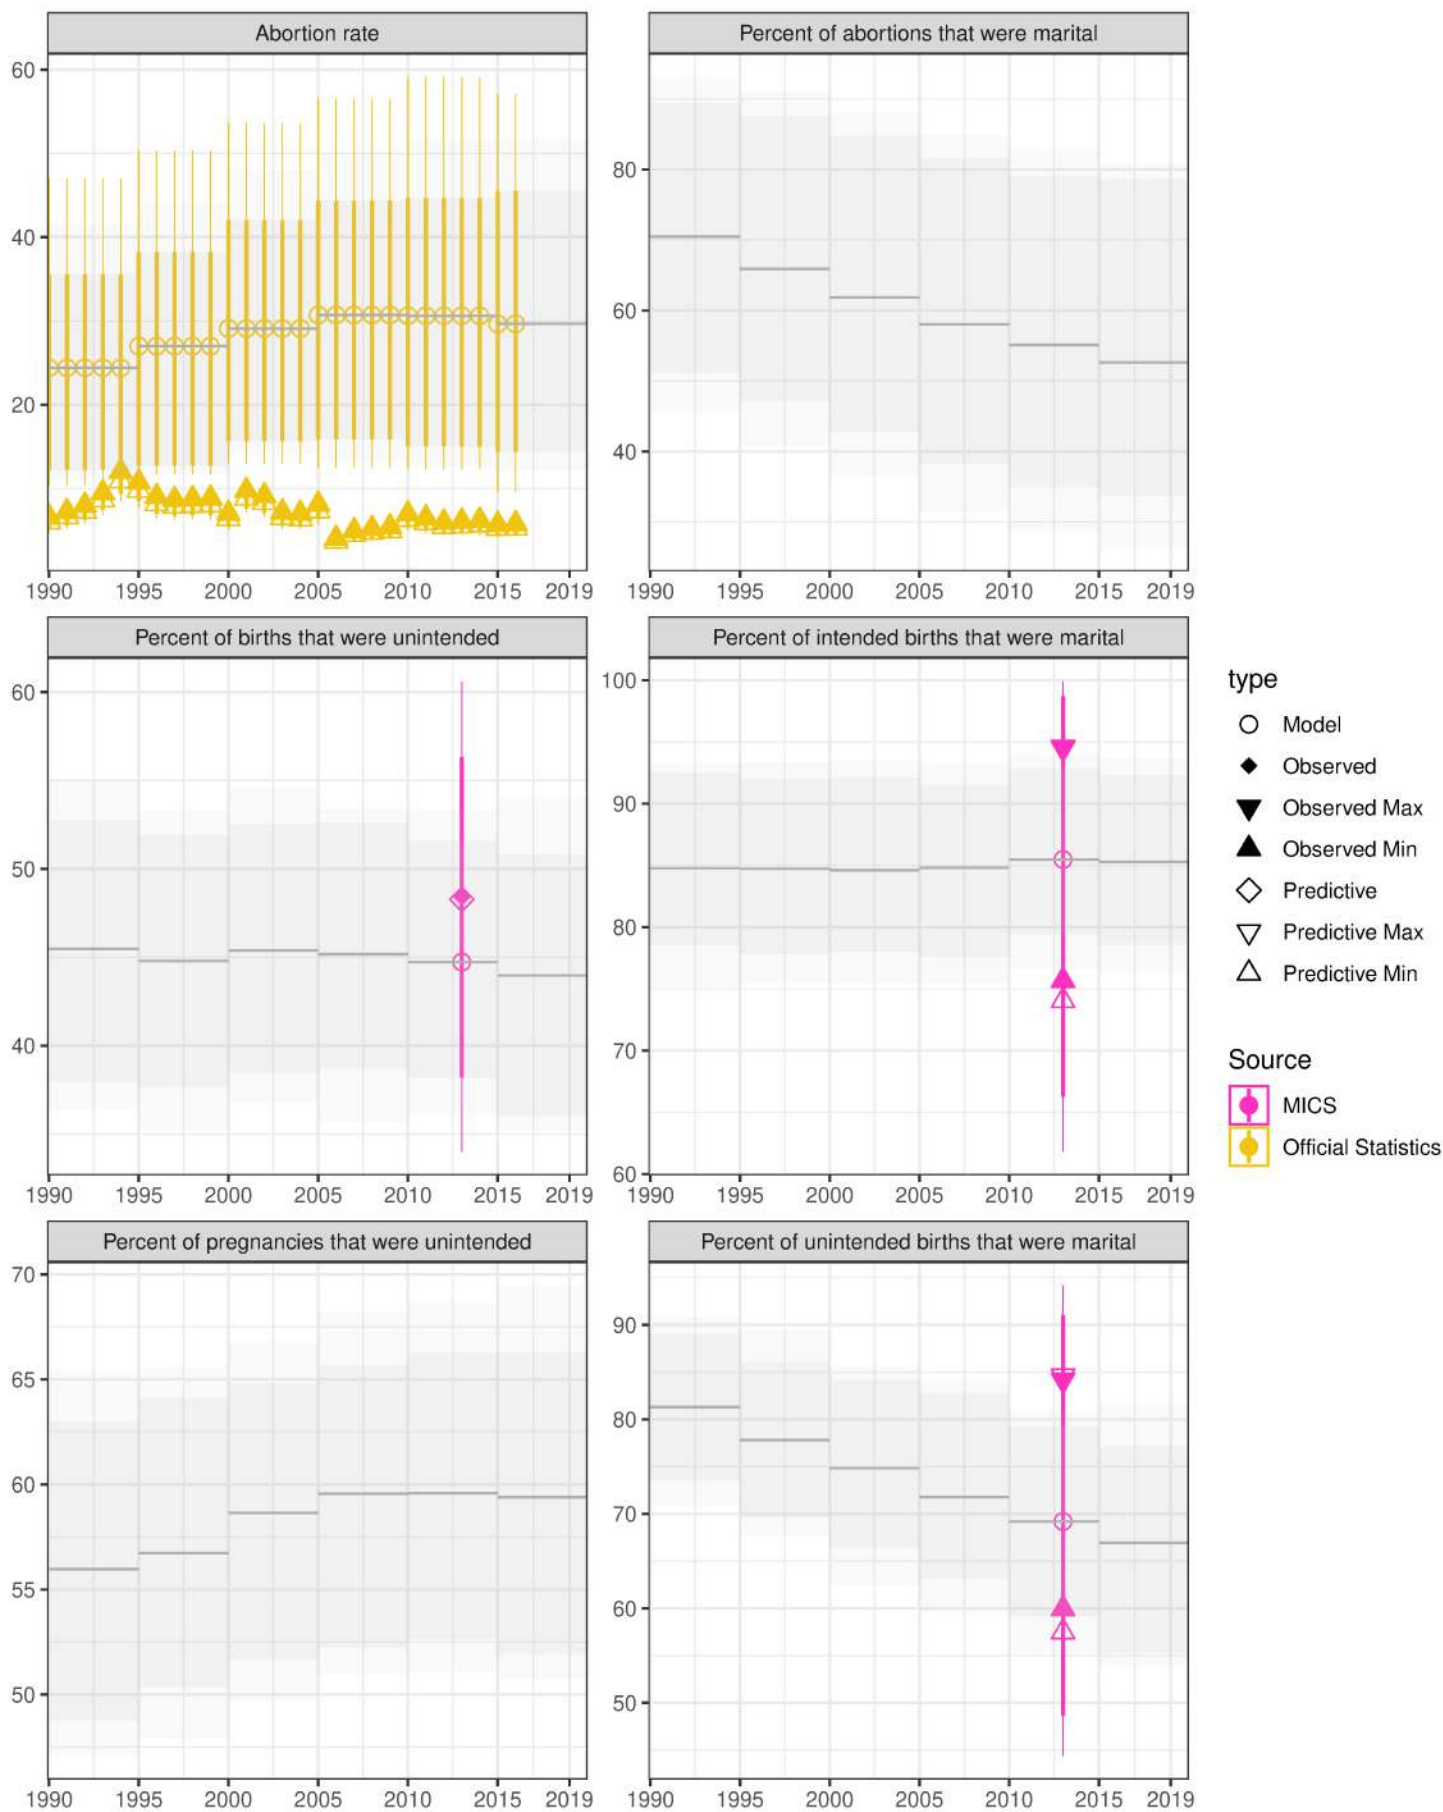

Note: Vertical lines and grey shading show 80% and 95% uncertainty intervals.

### 5.3 Caribbean



### Barbados

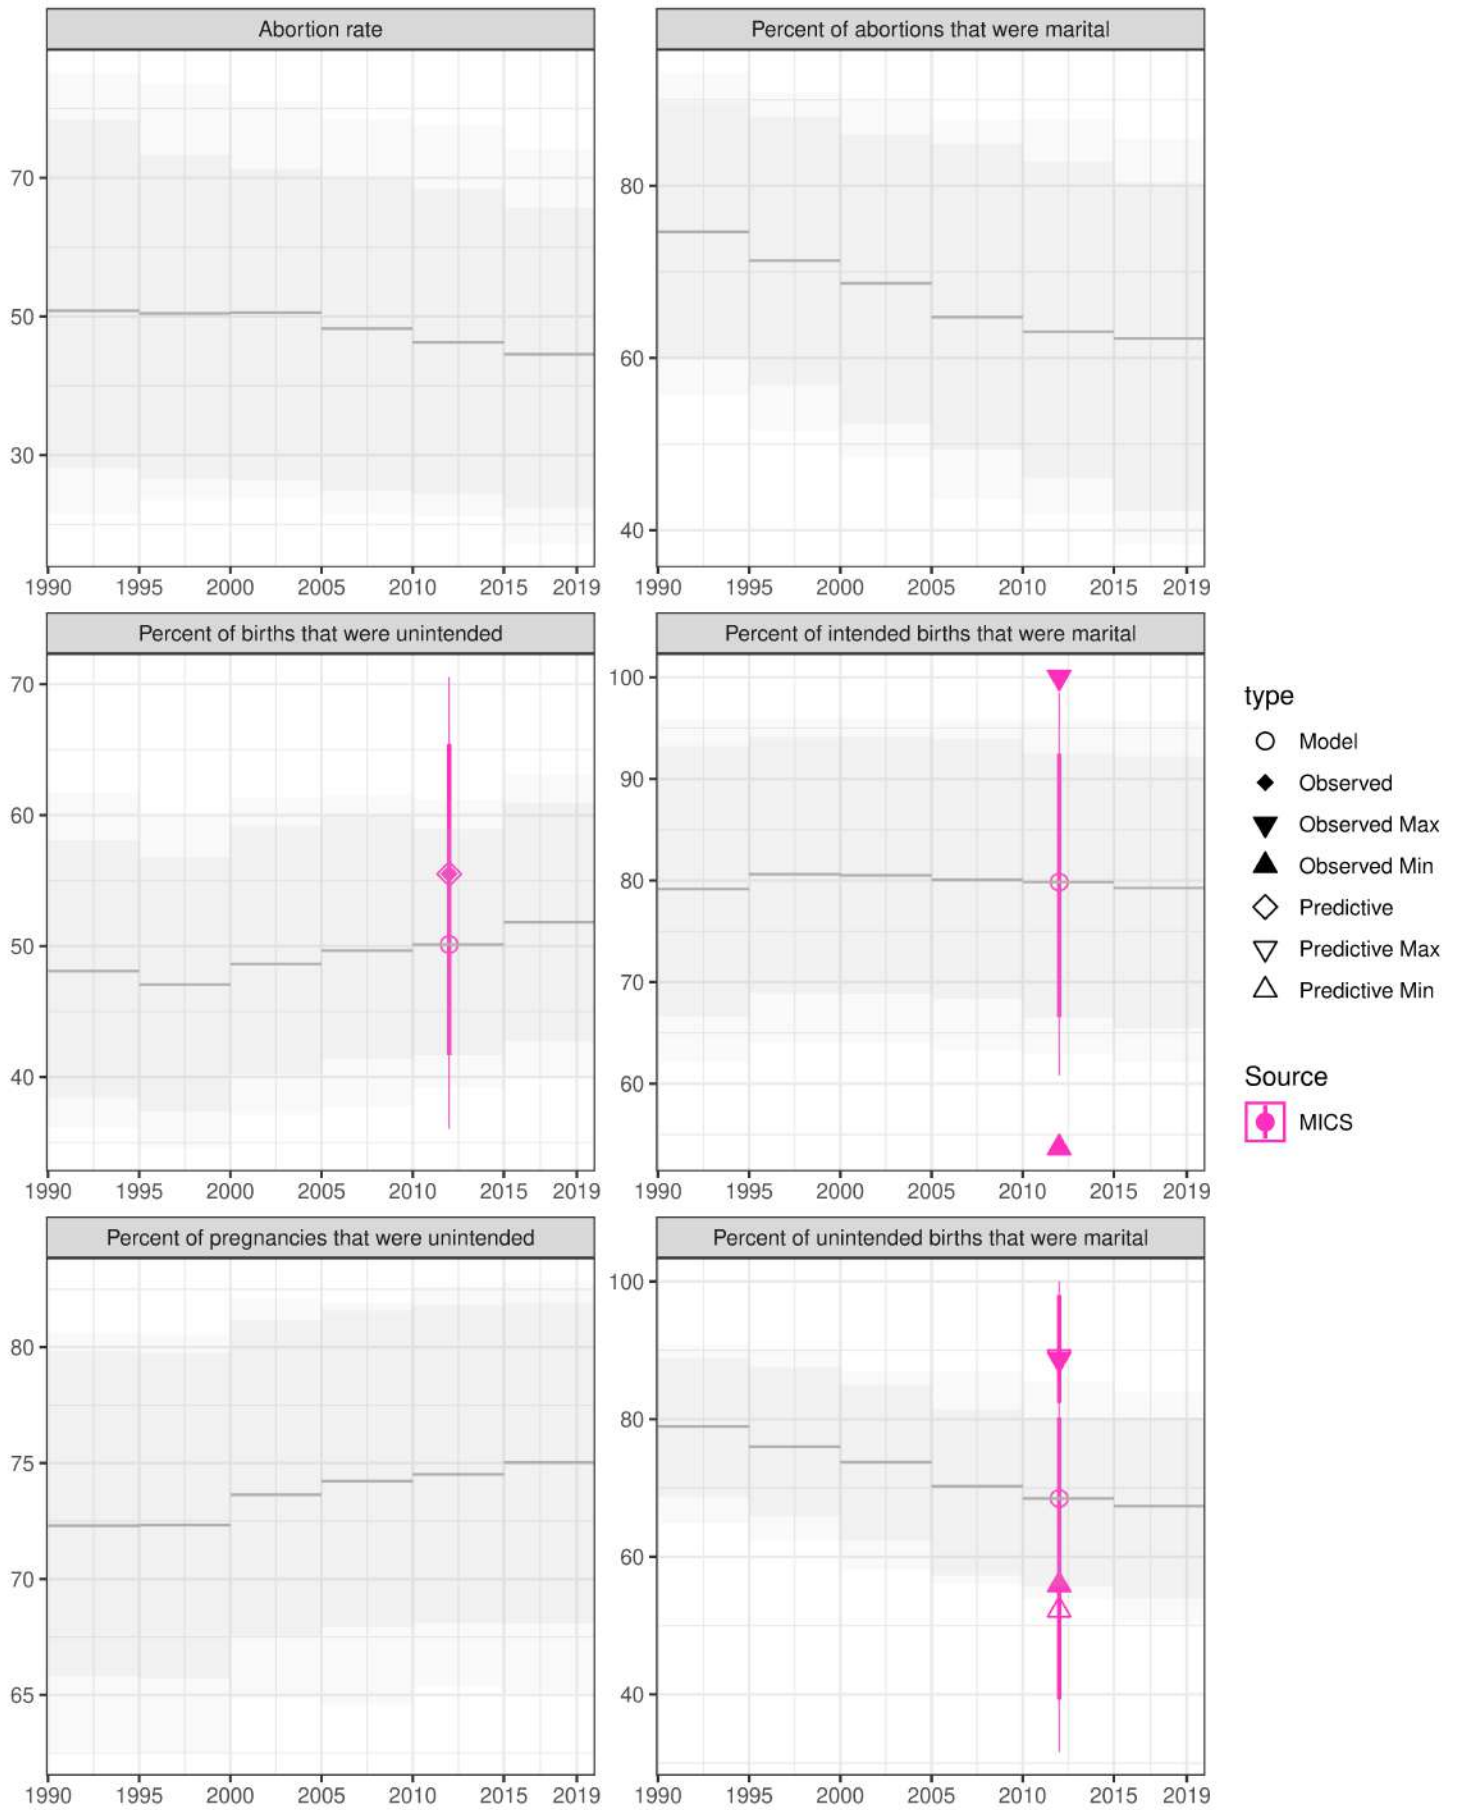

Note: Vertical lines and grey shading show 80% and 95% uncertainty intervals.

Cuba

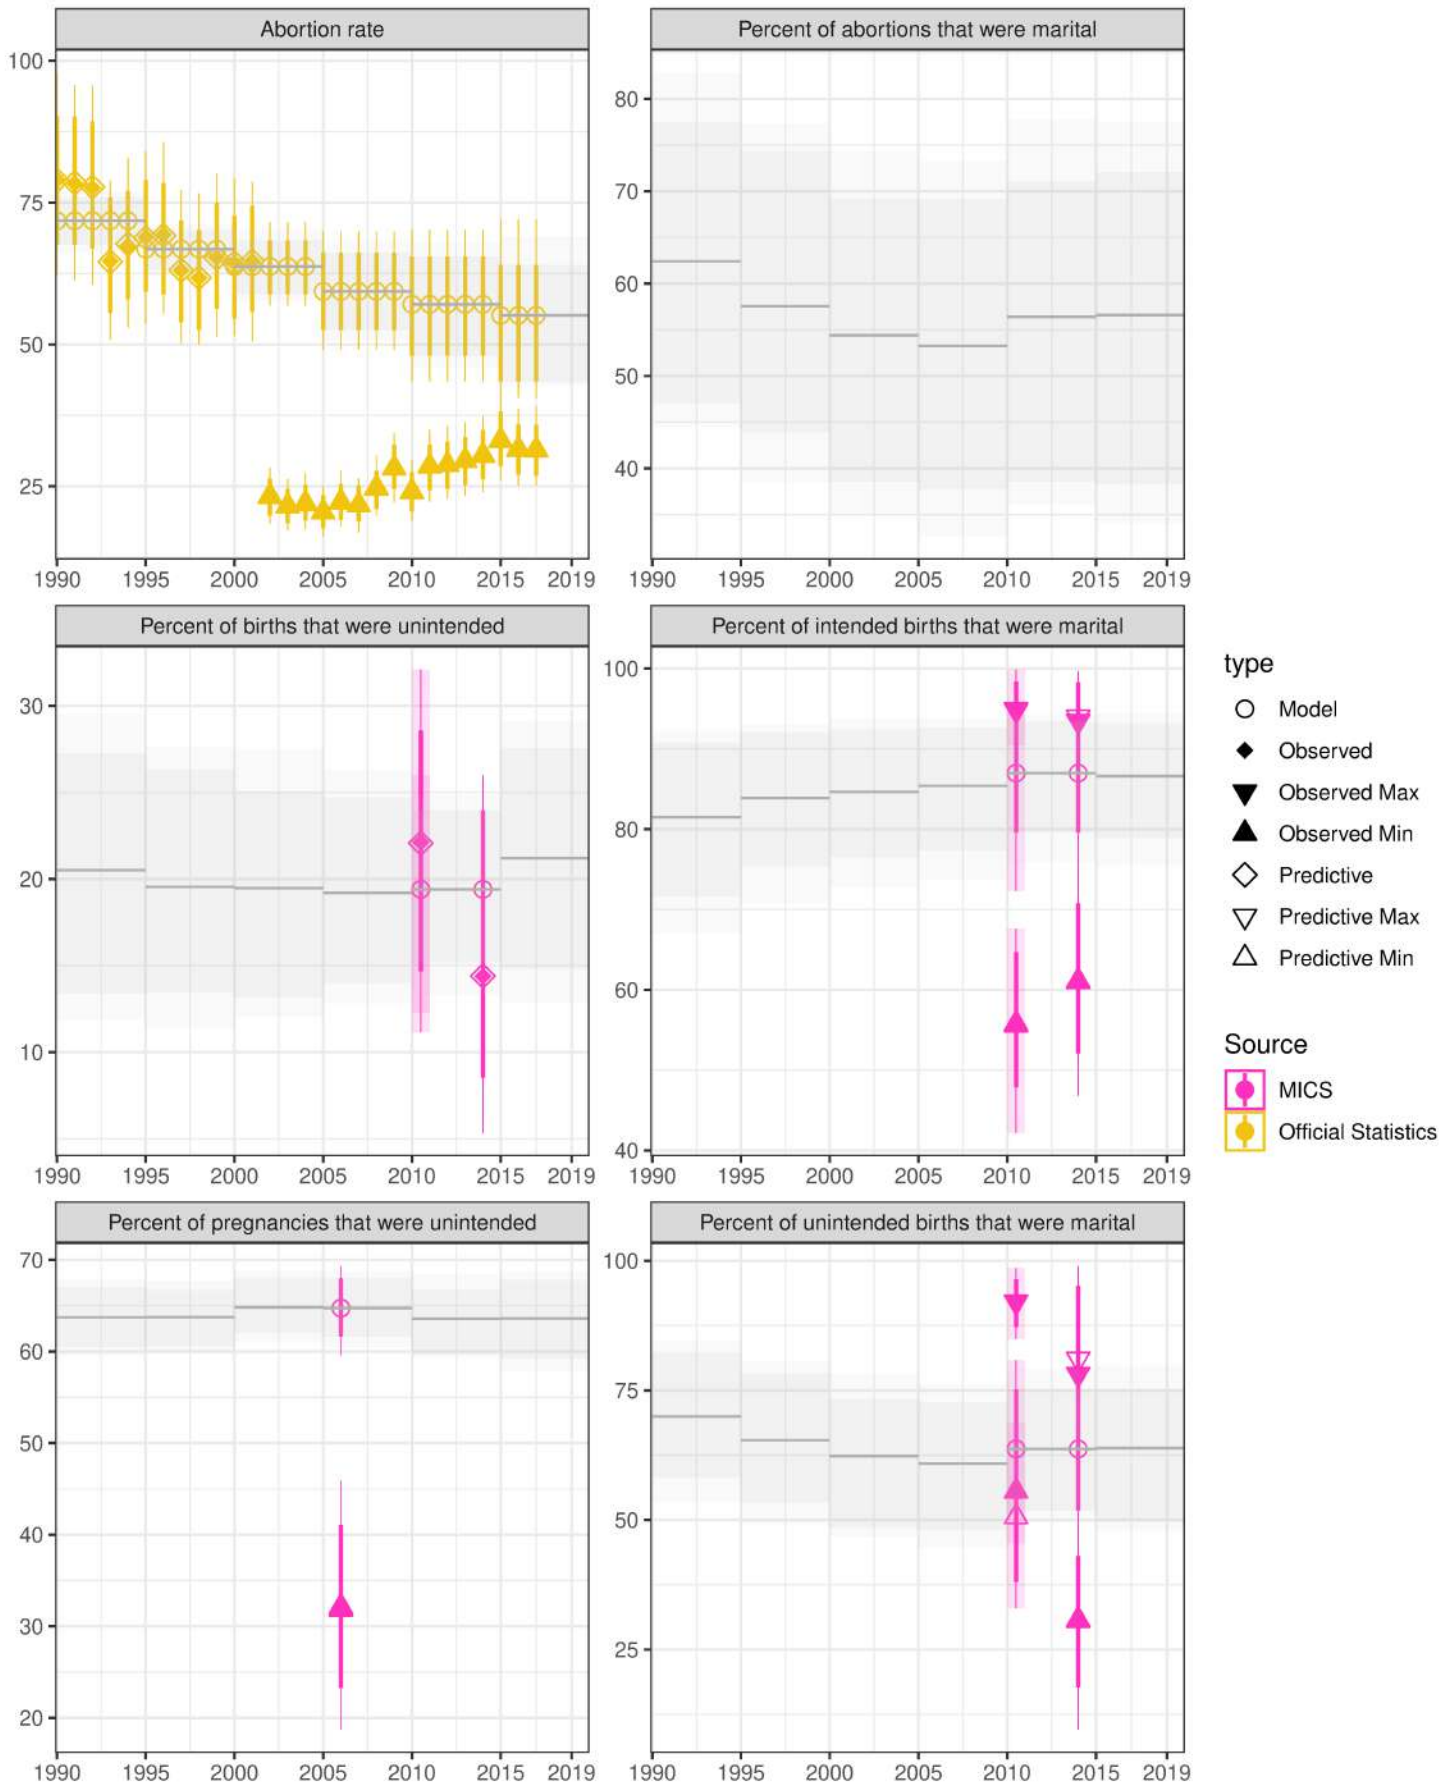

Note: Vertical lines and grey shading show 80% and 95% uncertainty intervals. Color shading shows when data were collected, if more than one year.

### Dominican Republic

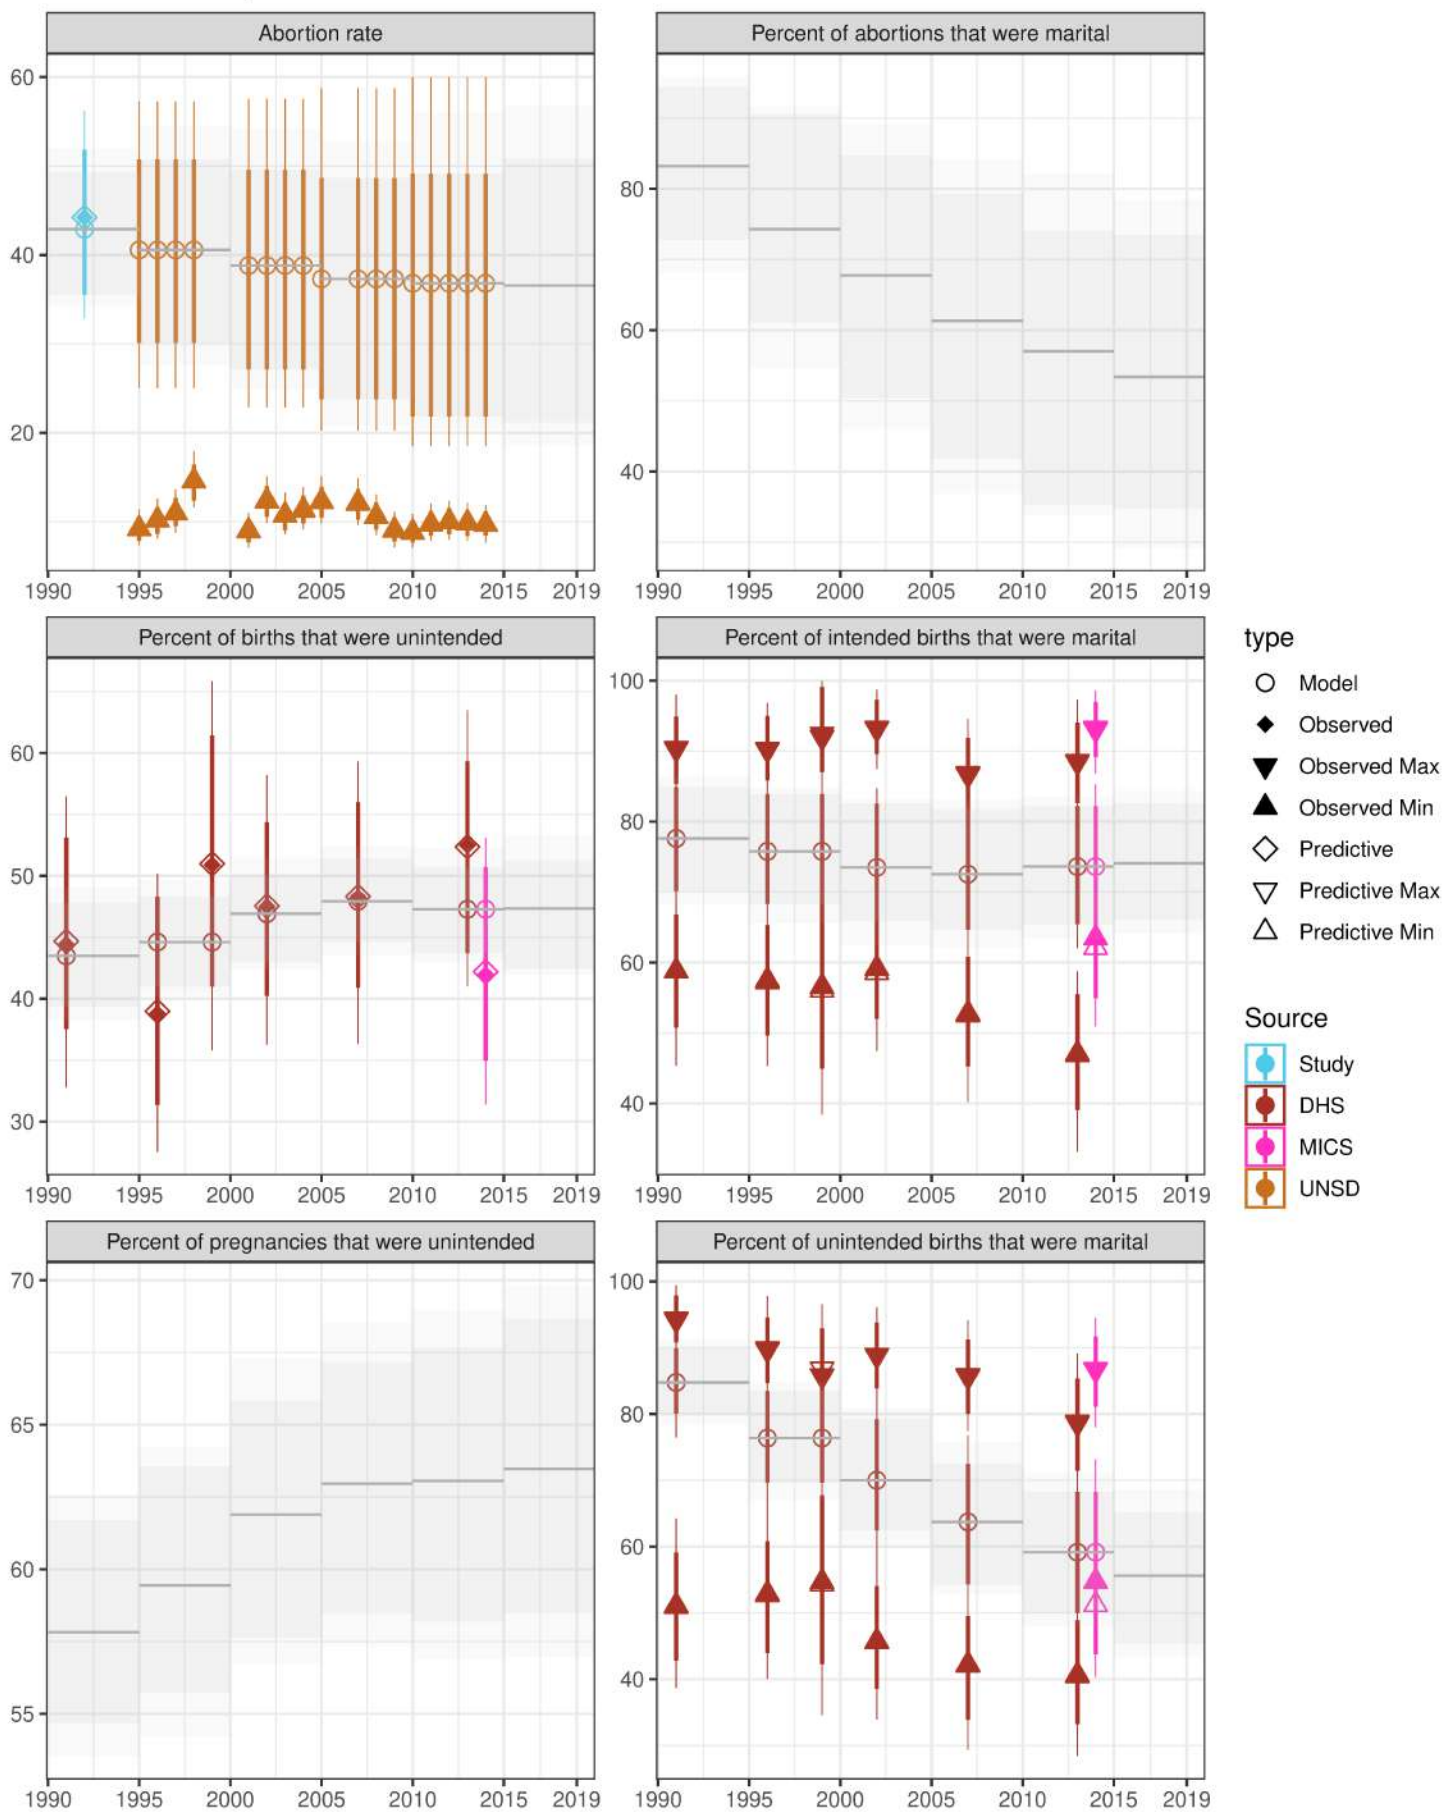

Note: Vertical lines and grey shading show 80% and 95% uncertainty intervals.

### Guadeloupe

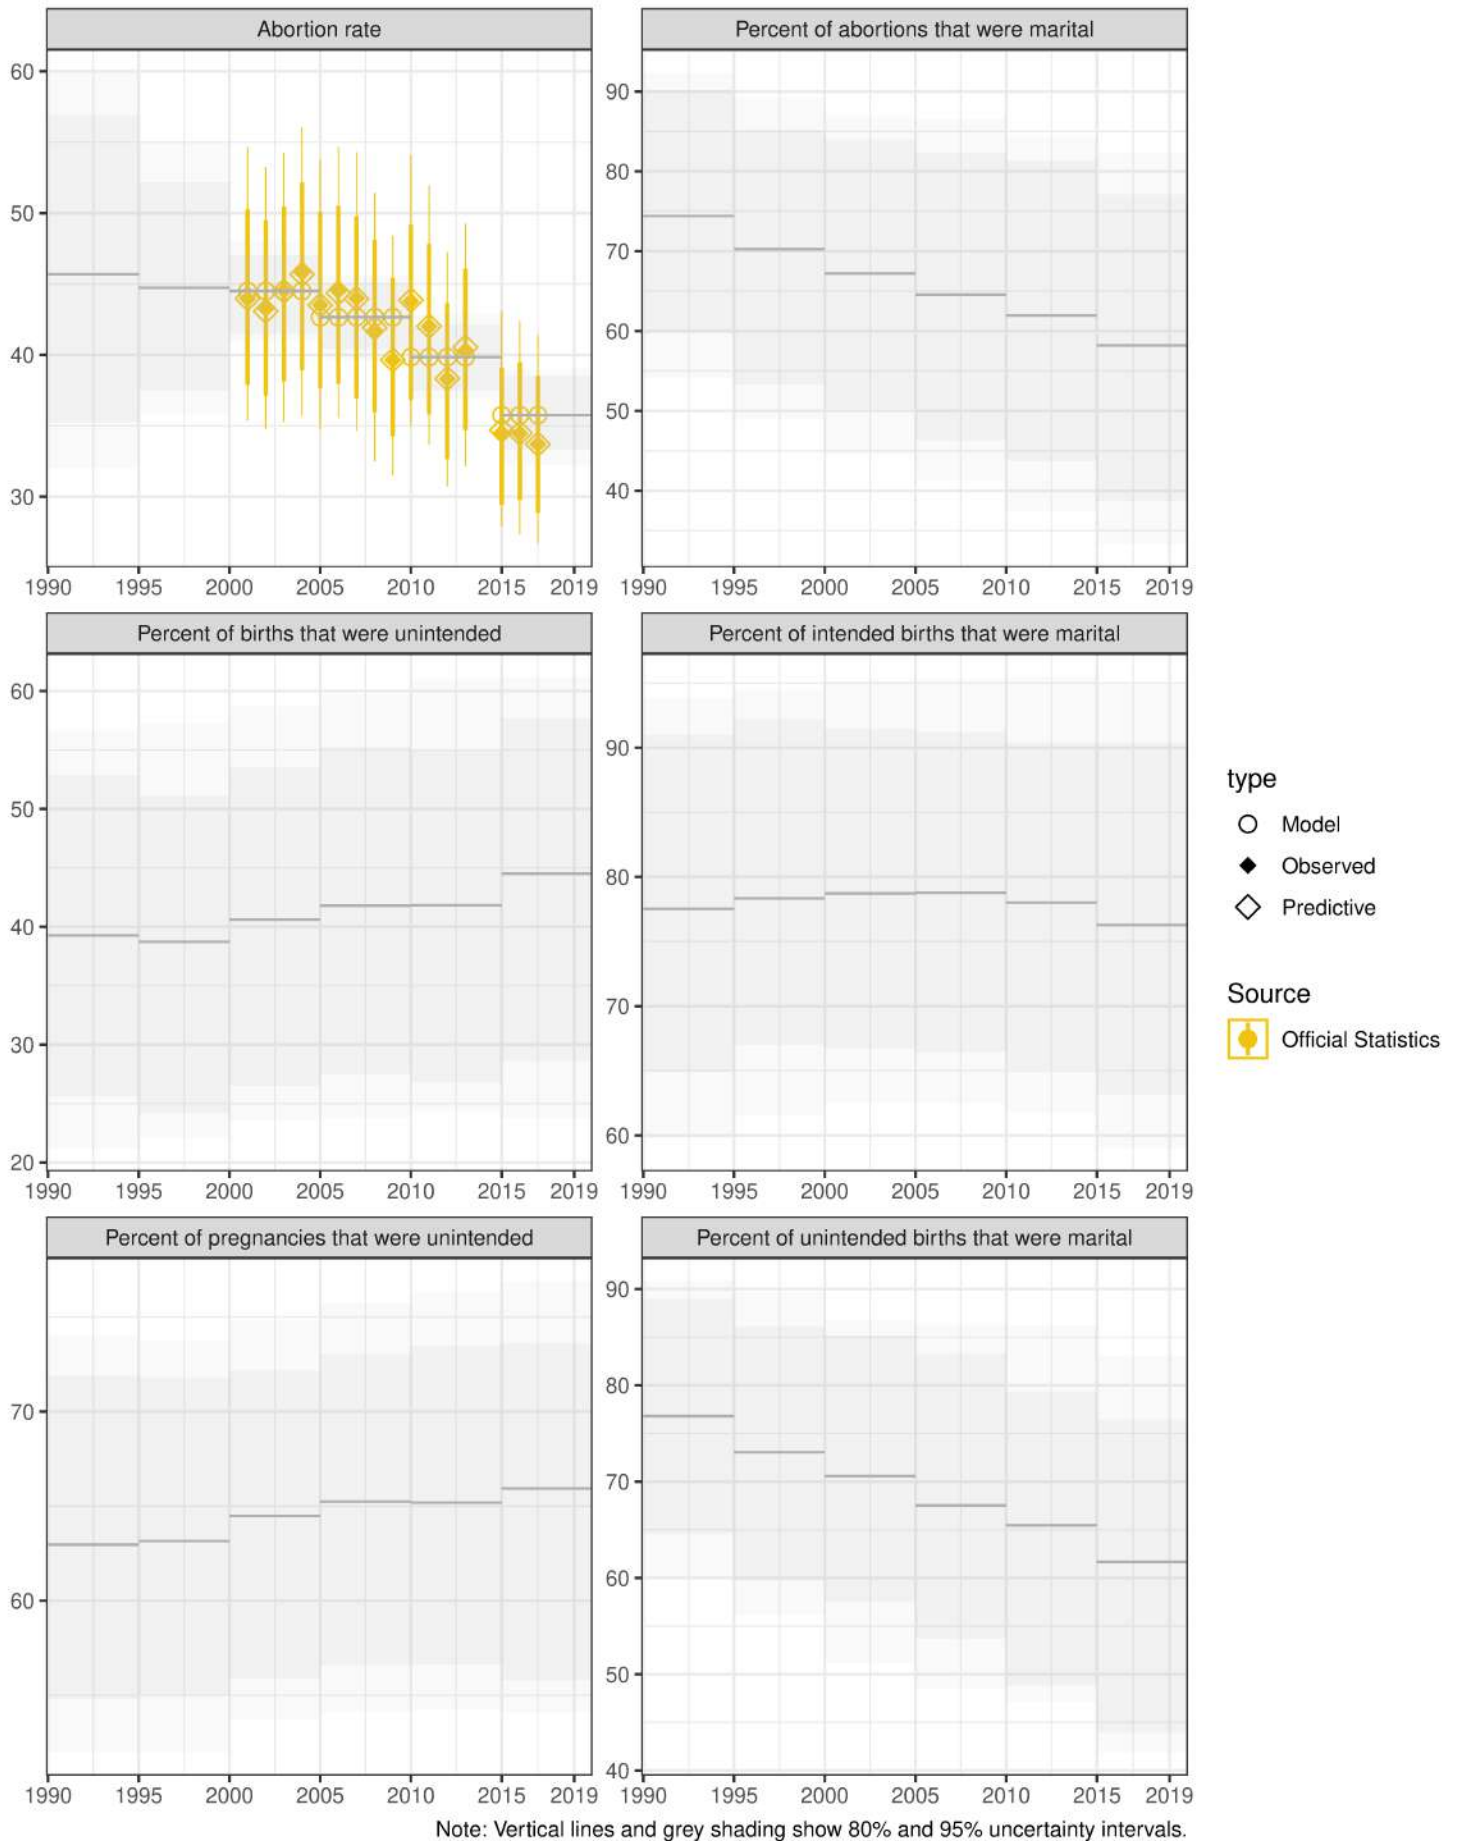

Haiti

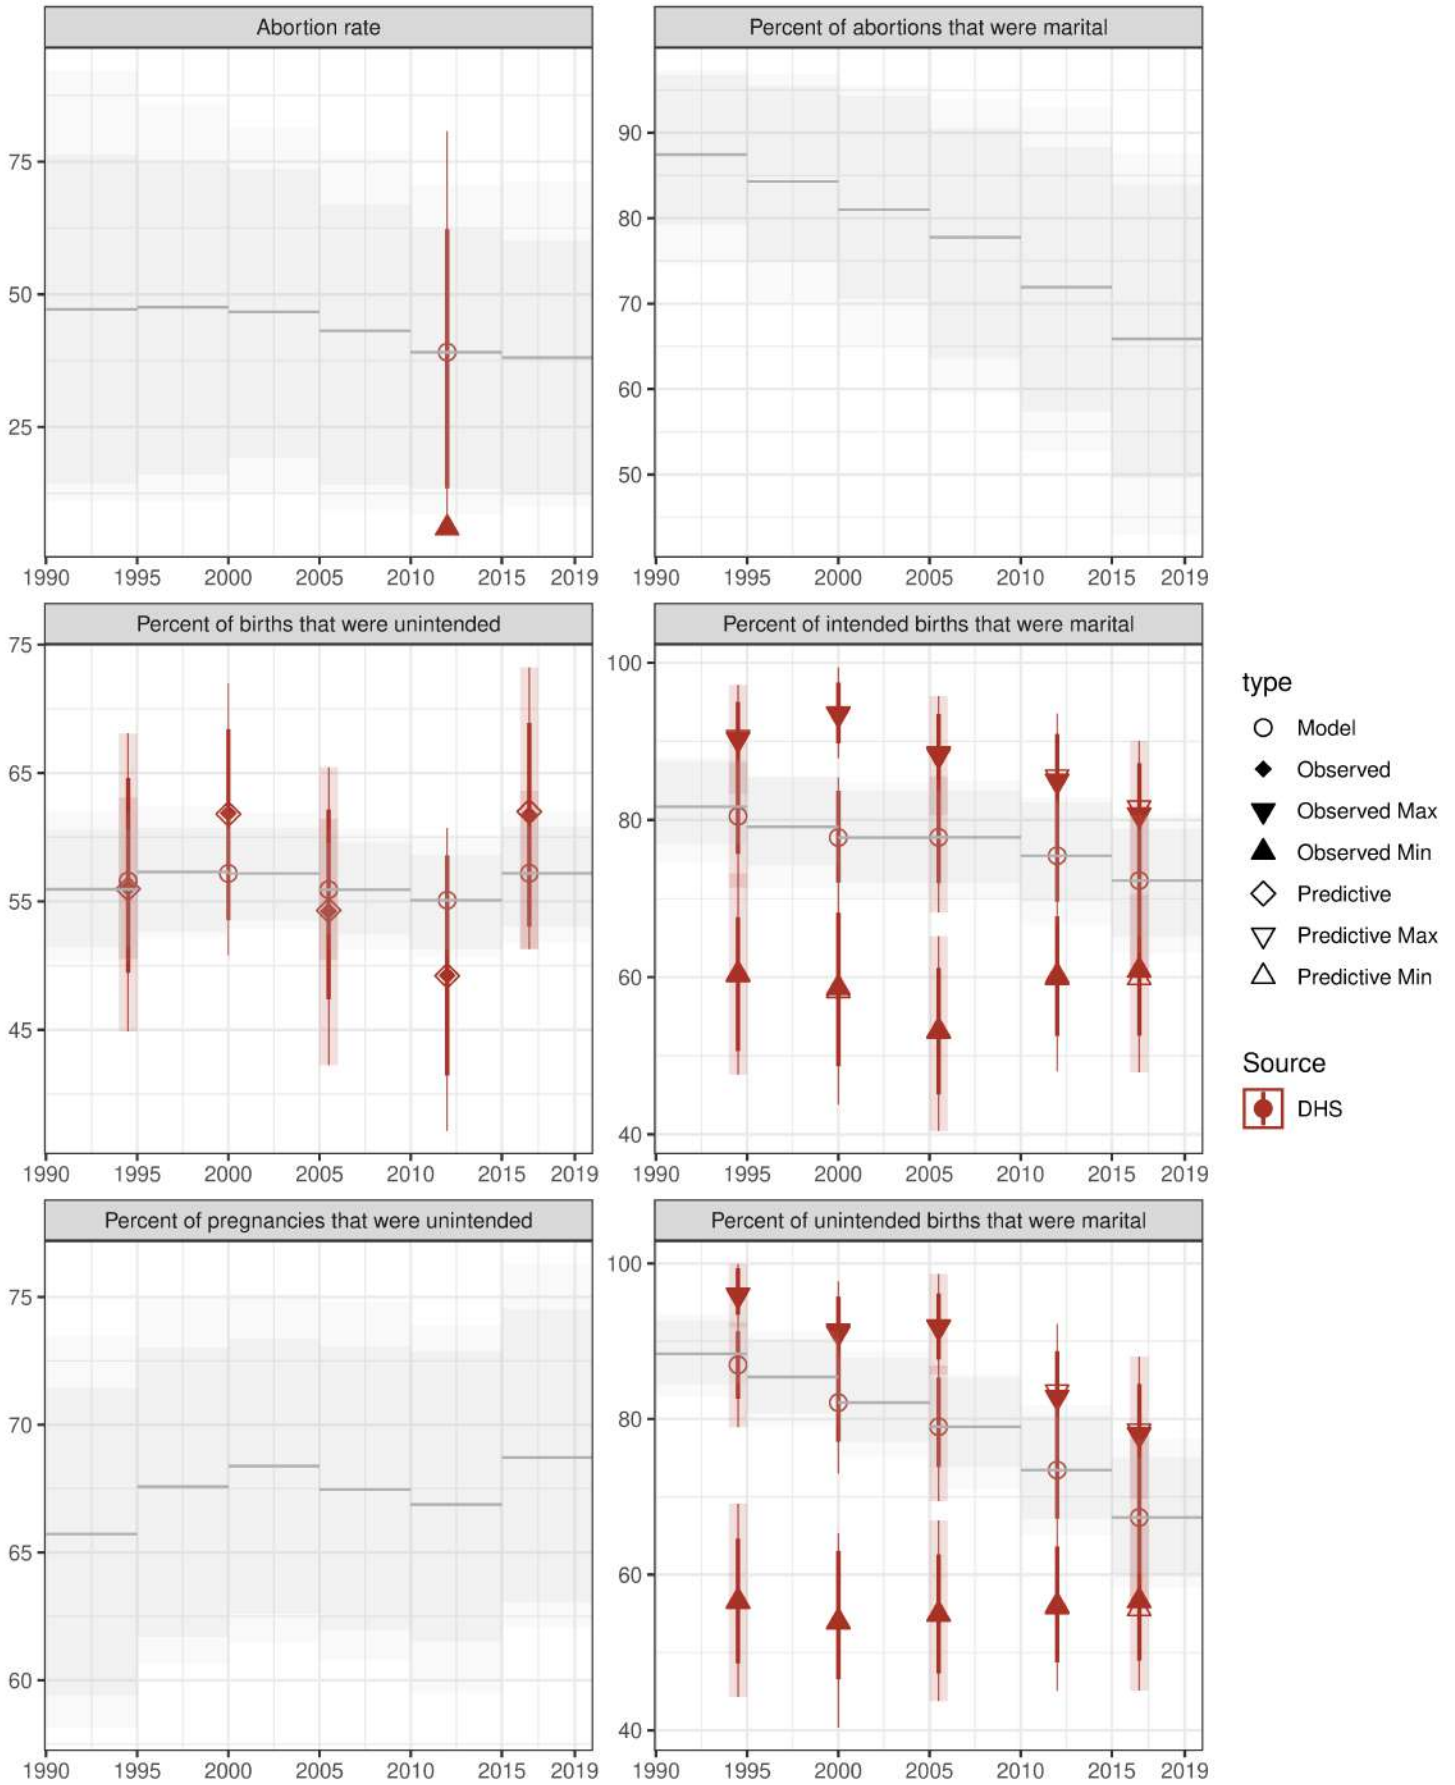

Note: Vertical lines and grey shading show 80% and 95% uncertainty intervals. Color shading shows when data were collected, if more than one year.

### Jamaica

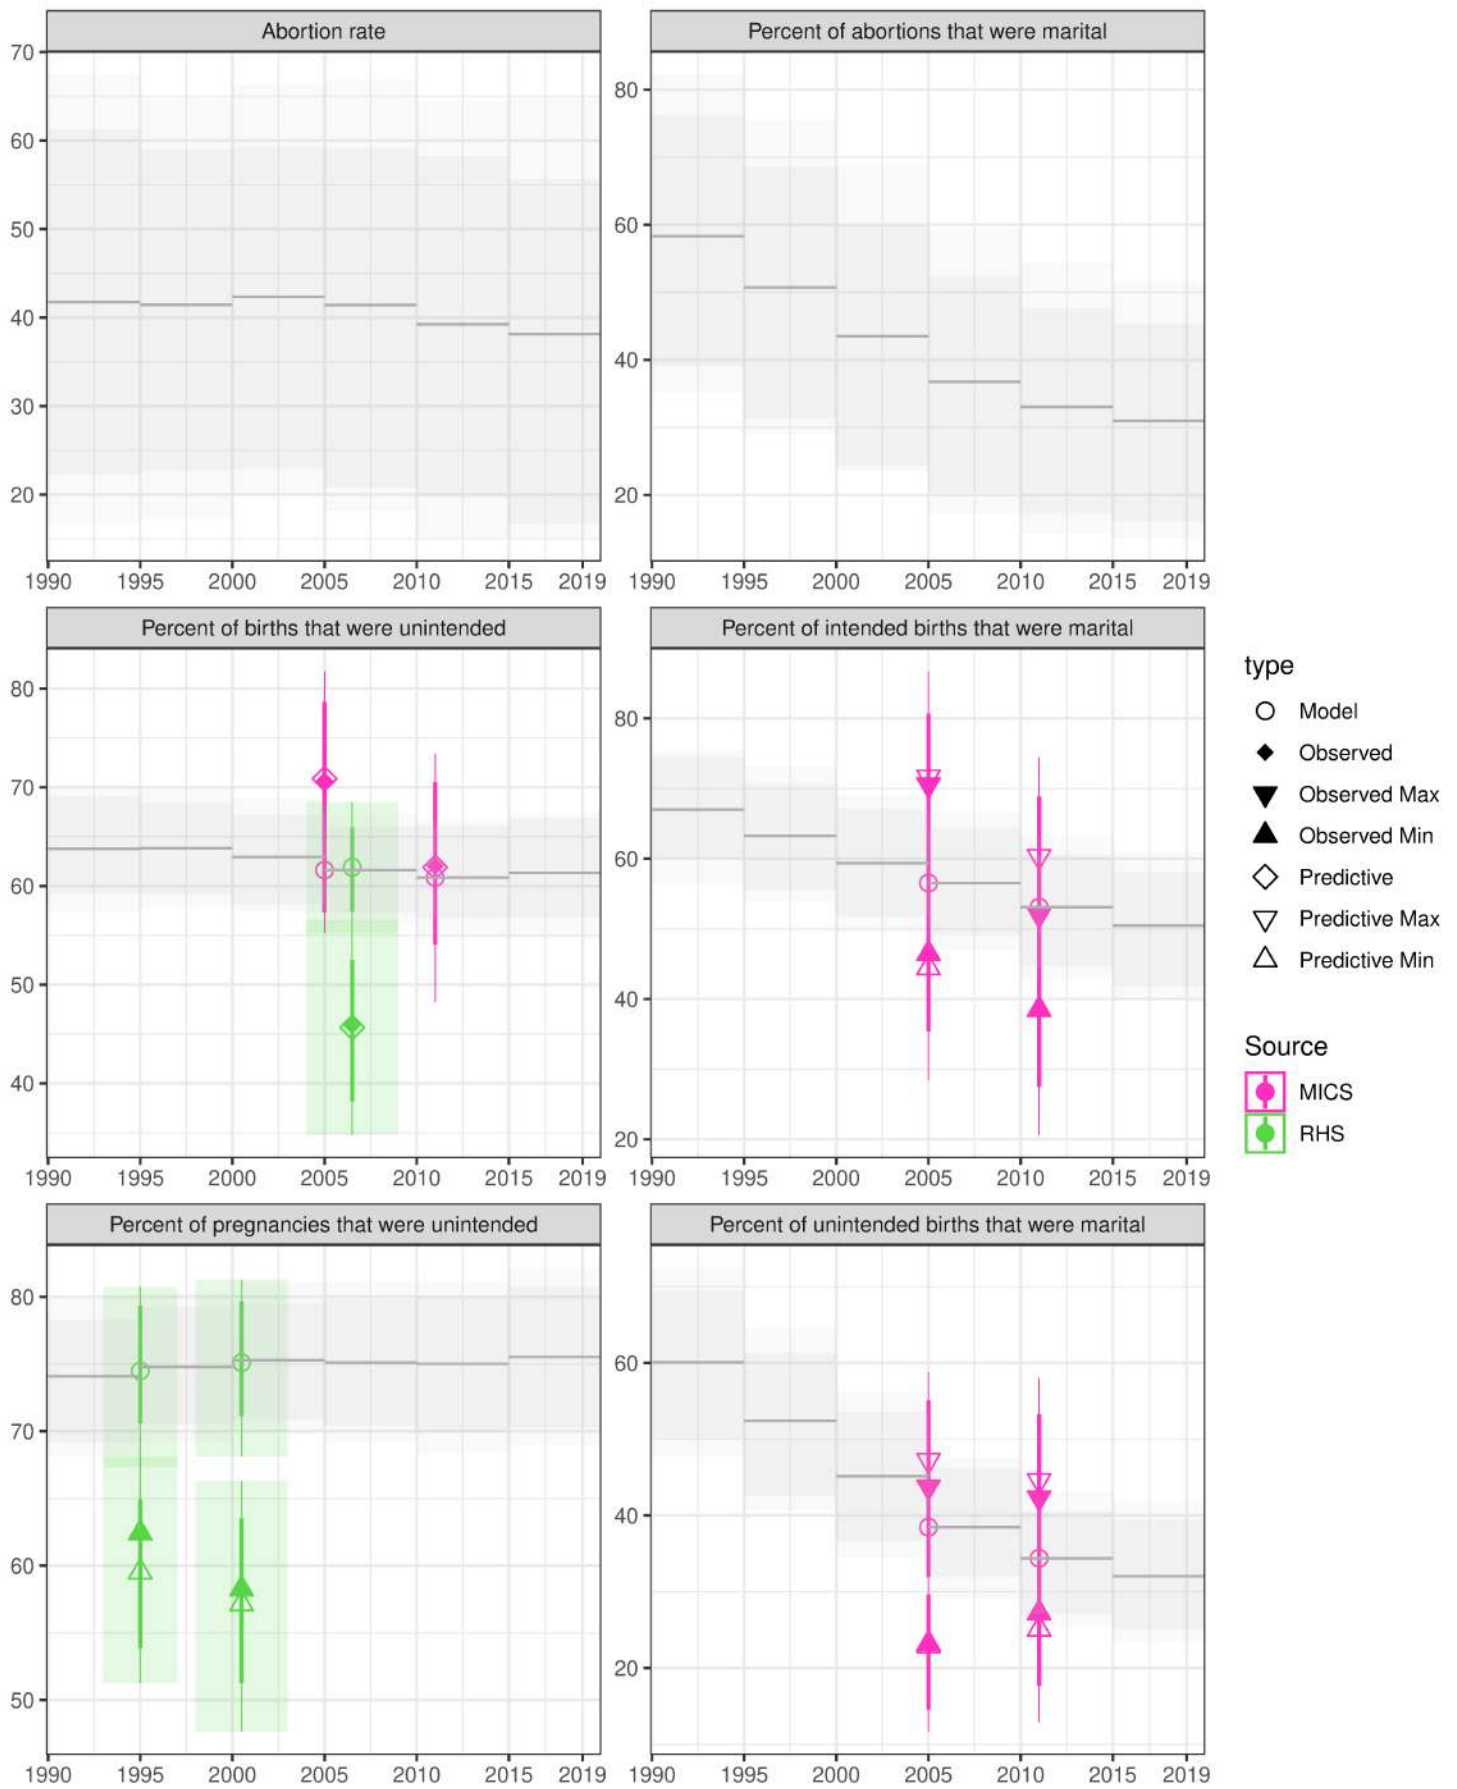

Note: Vertical lines and grey shading show 80% and 95% uncertainty intervals. Color shading shows when data were collected, if more than one year.

### Martinique

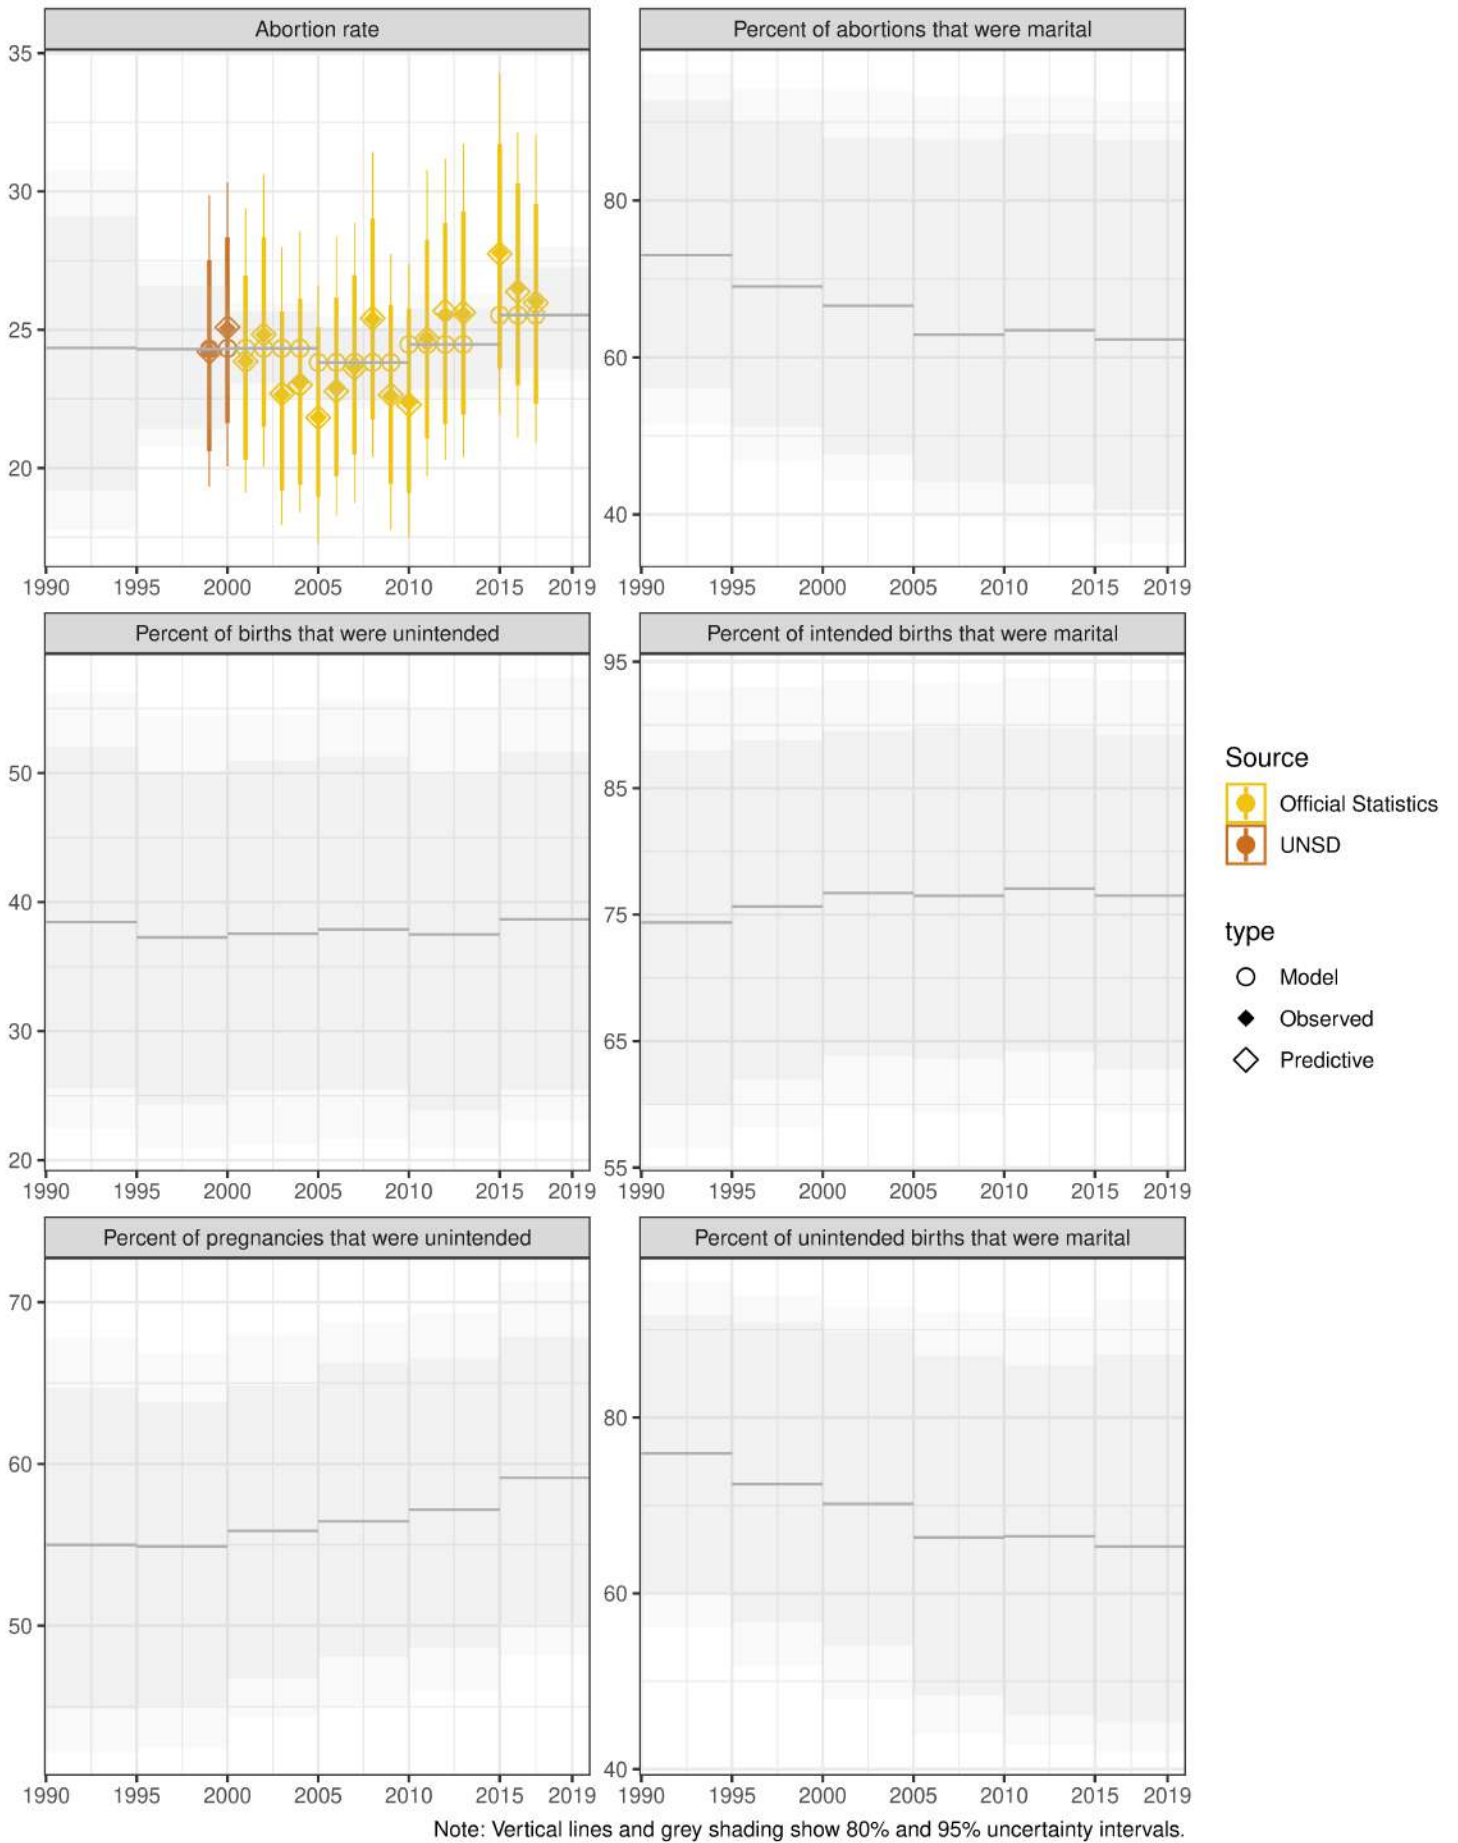

### Puerto Rico

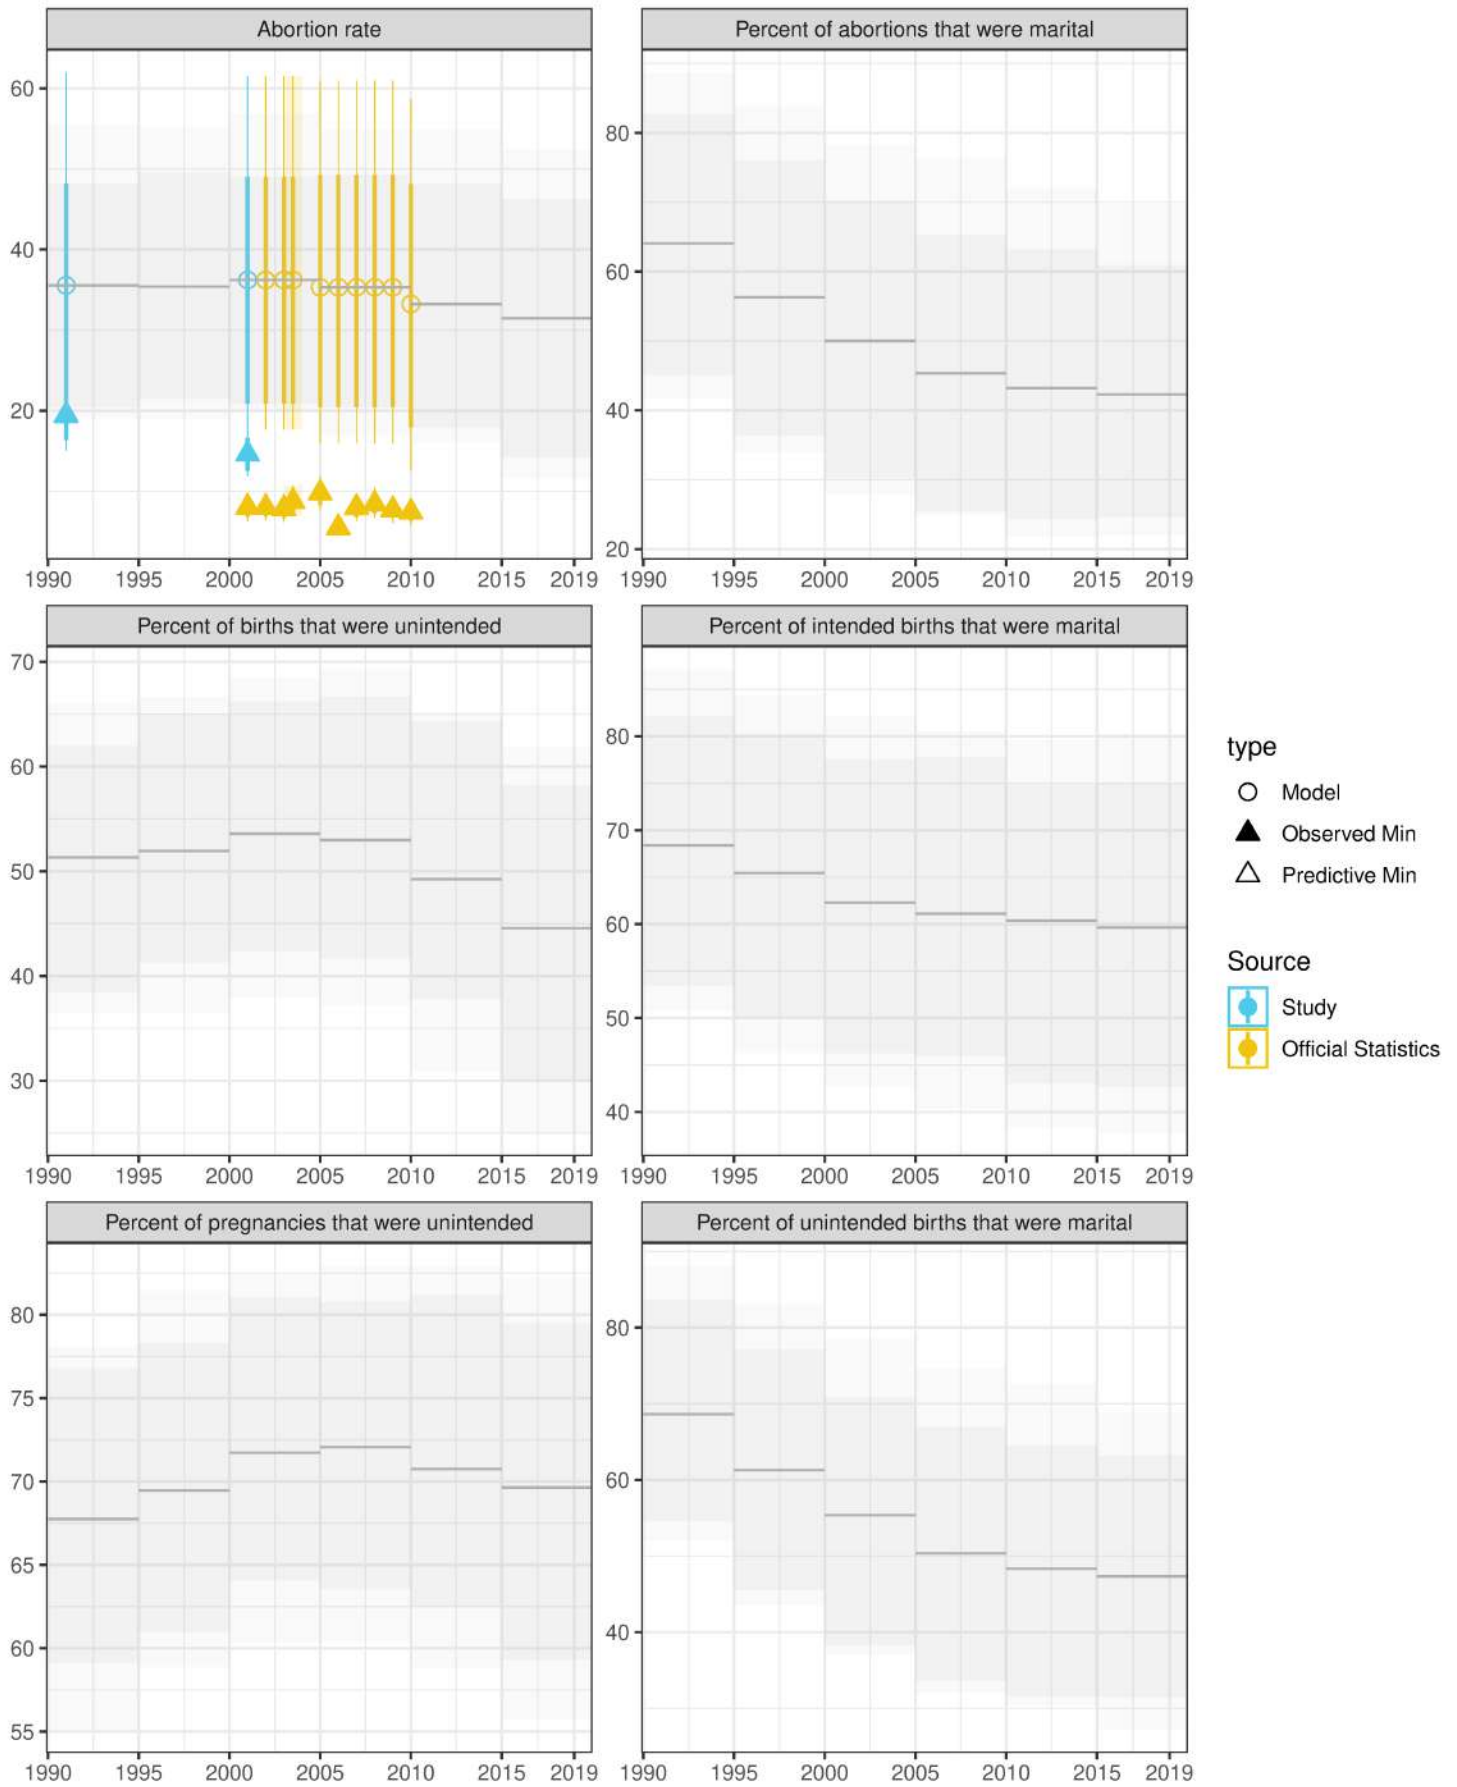

Note: Vertical lines and grey shading show 80% and 95% uncertainty intervals. Color shading shows when data were collected, if more than one year.



### Saint Lucia

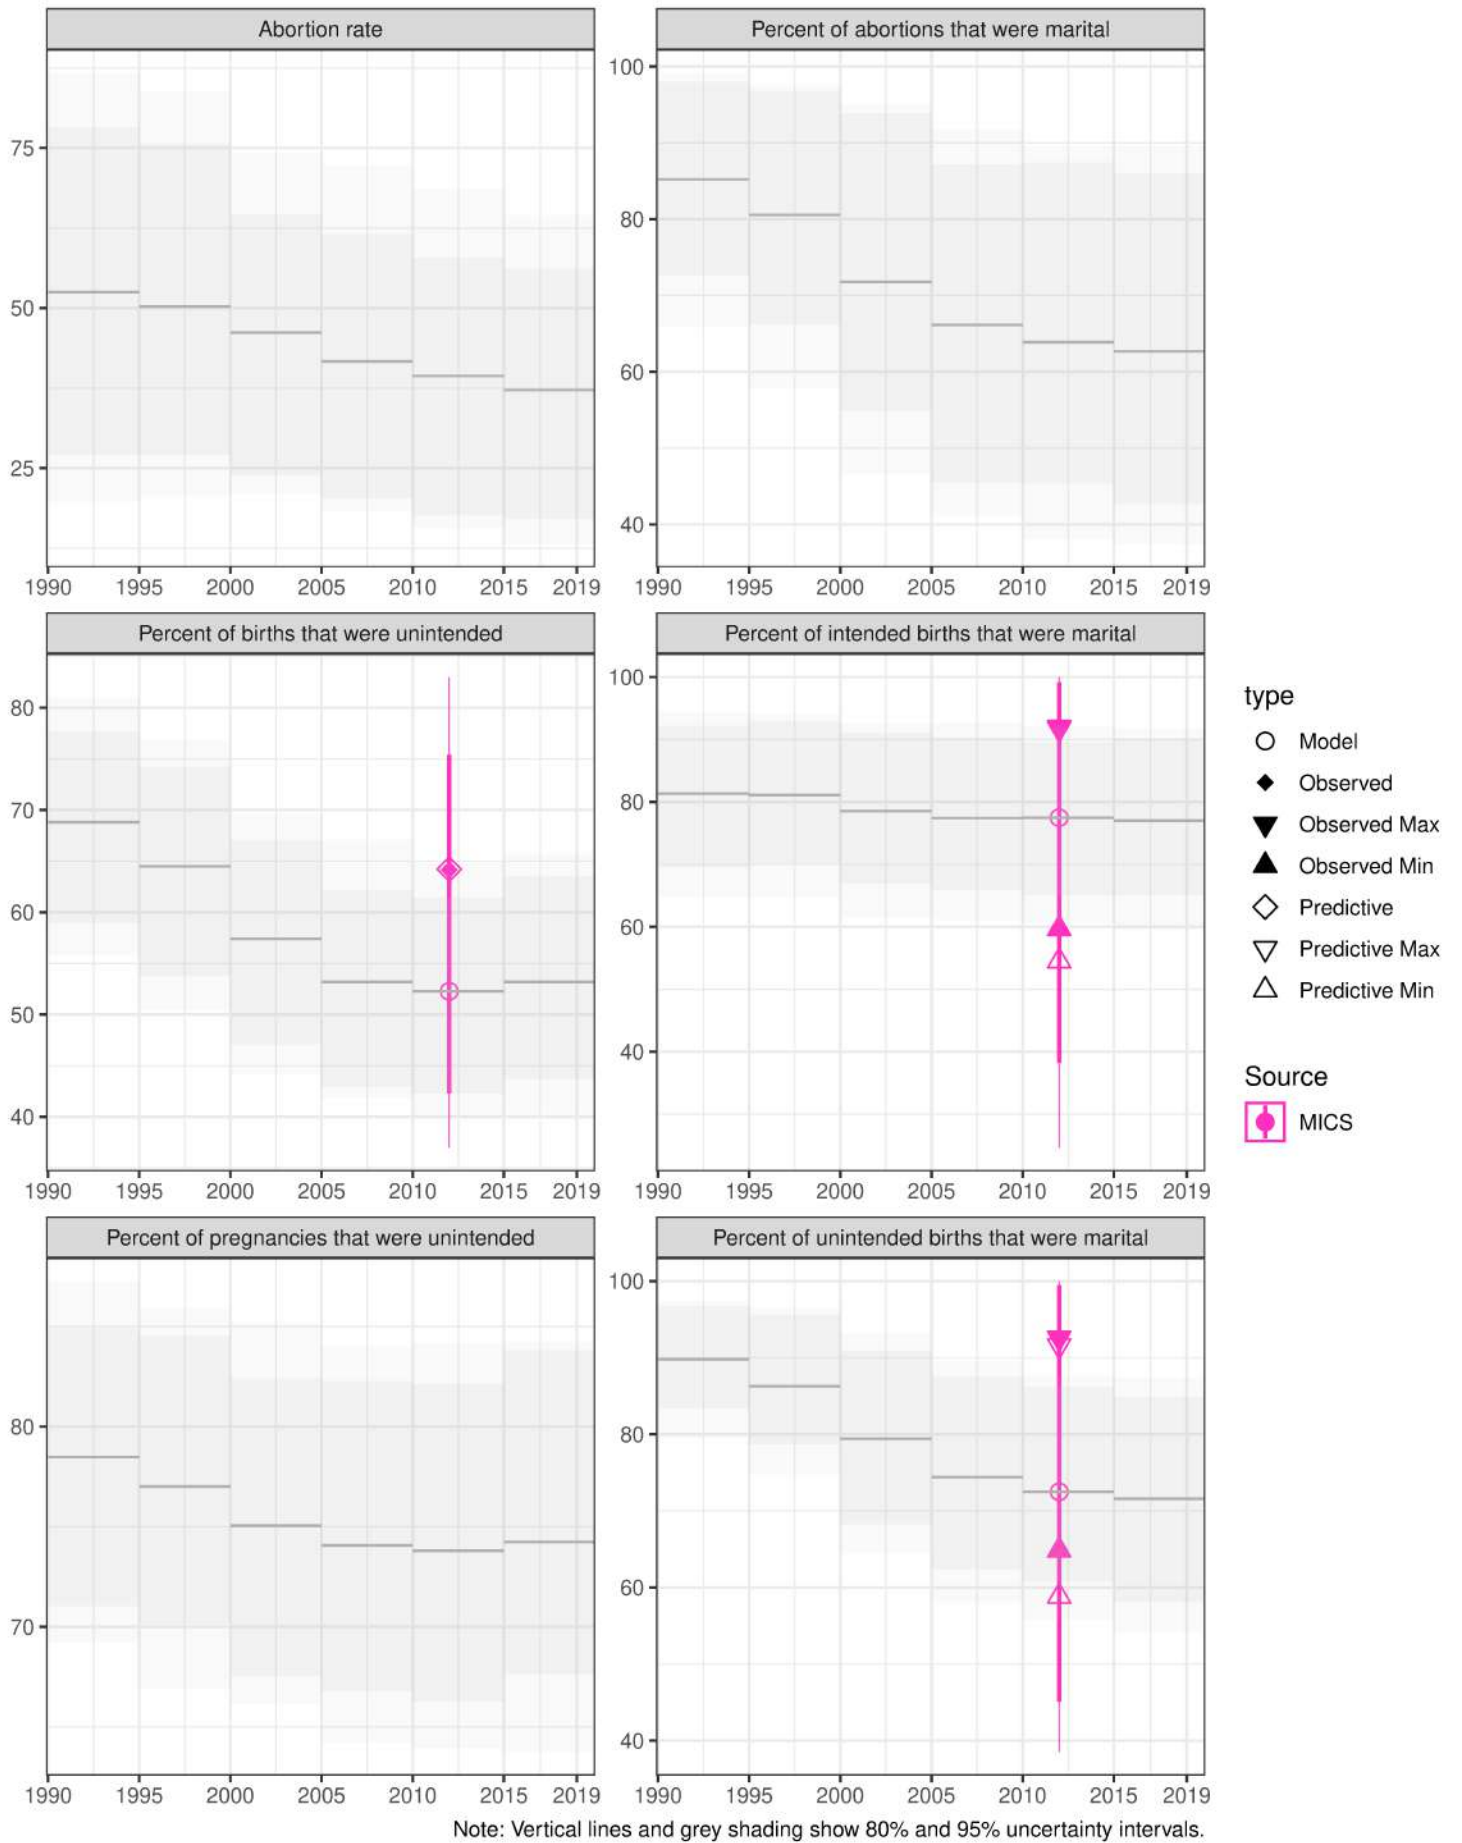

### Trinidad and Tobago

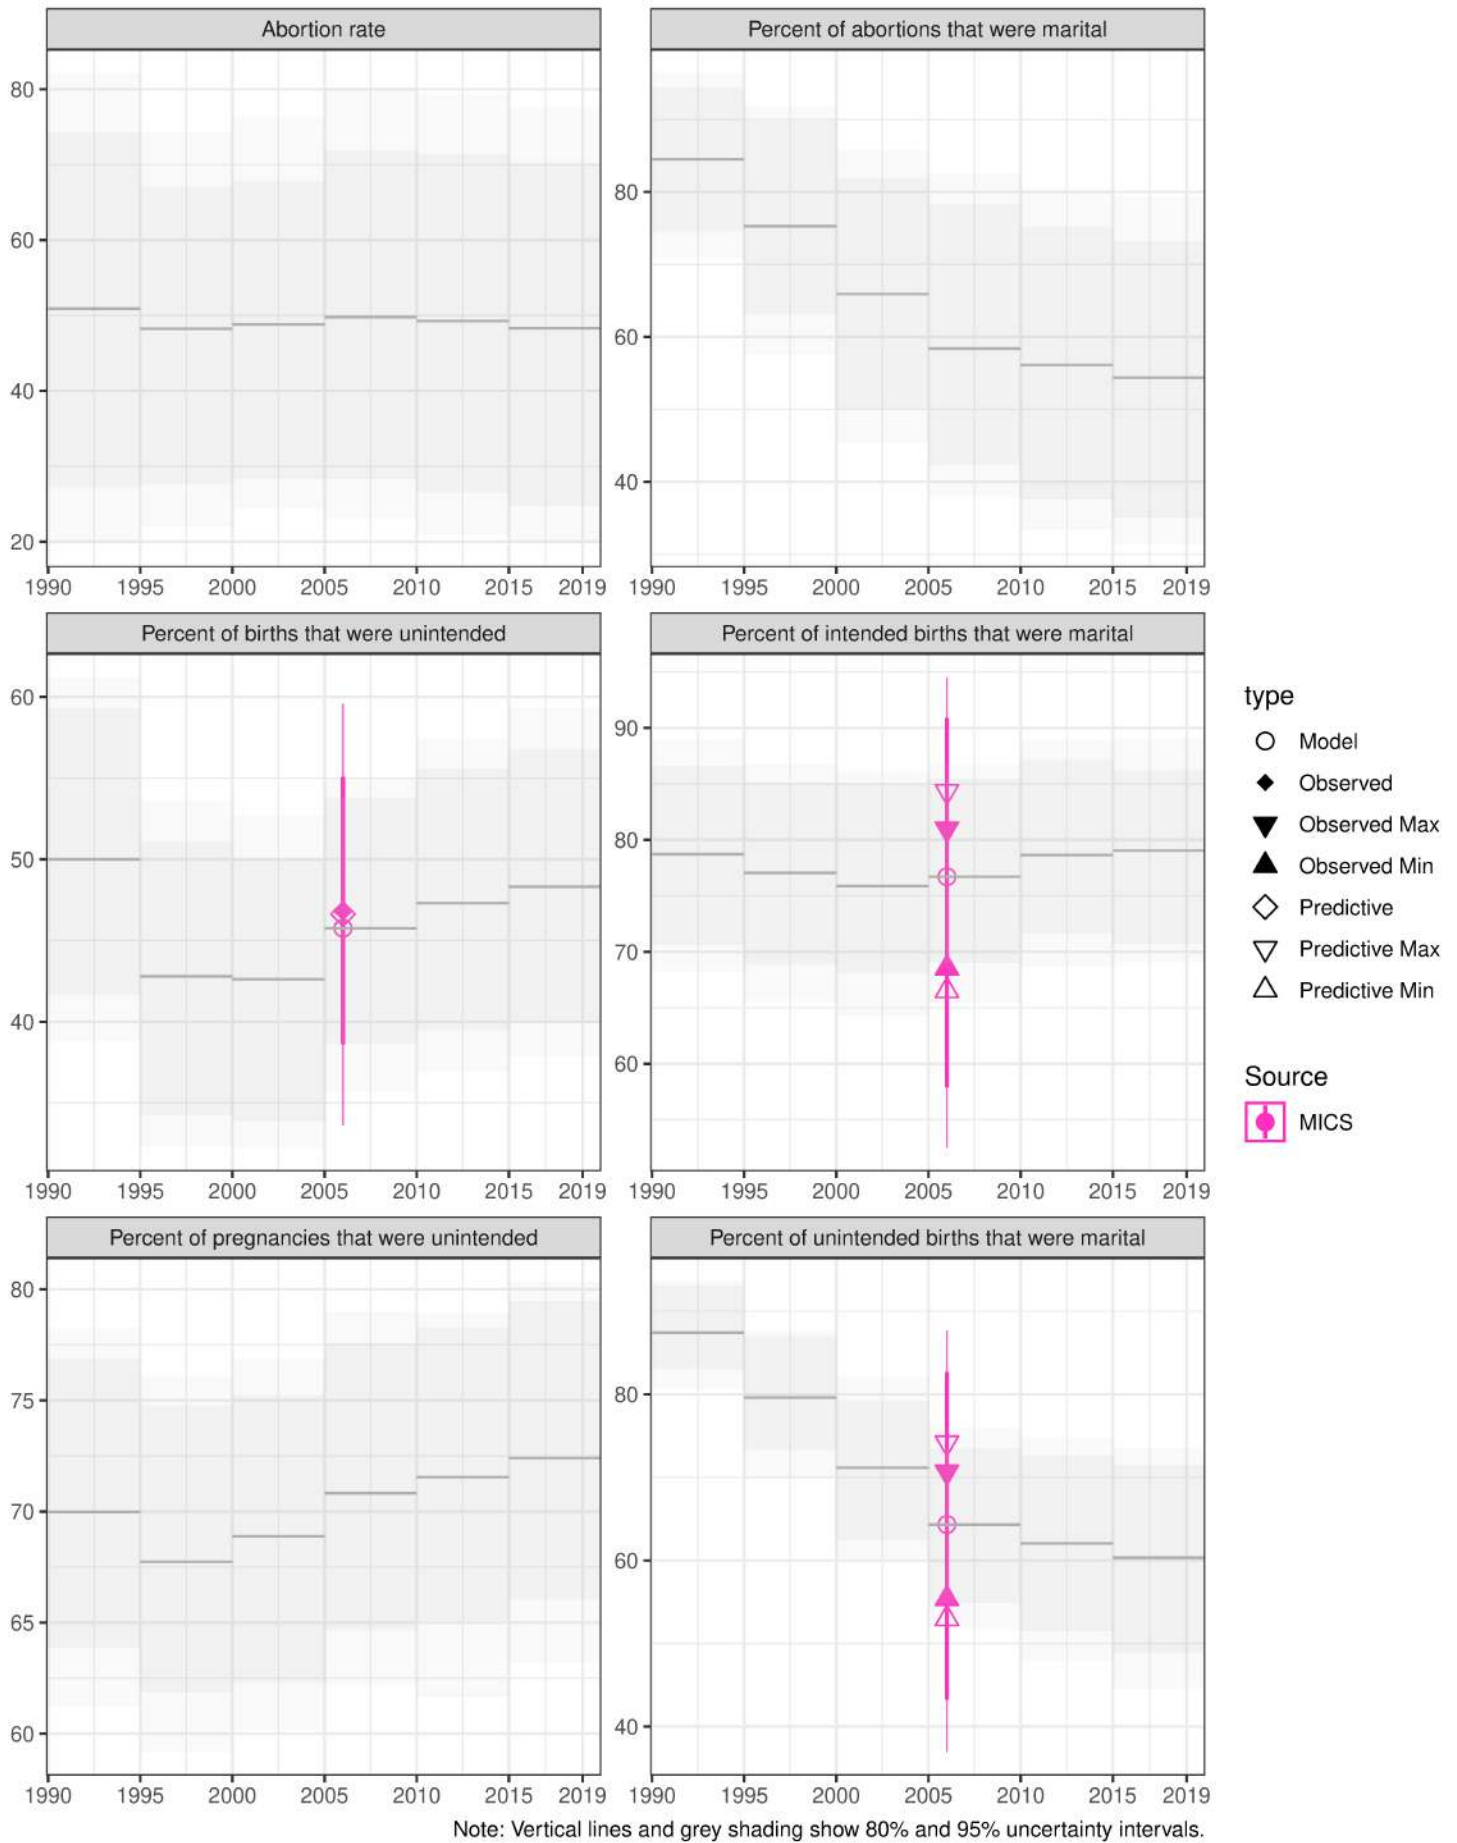

Note: Vertical lines and grey shading show 80% and 95% uncertainty intervals.

## 6 Oceania

### Australia

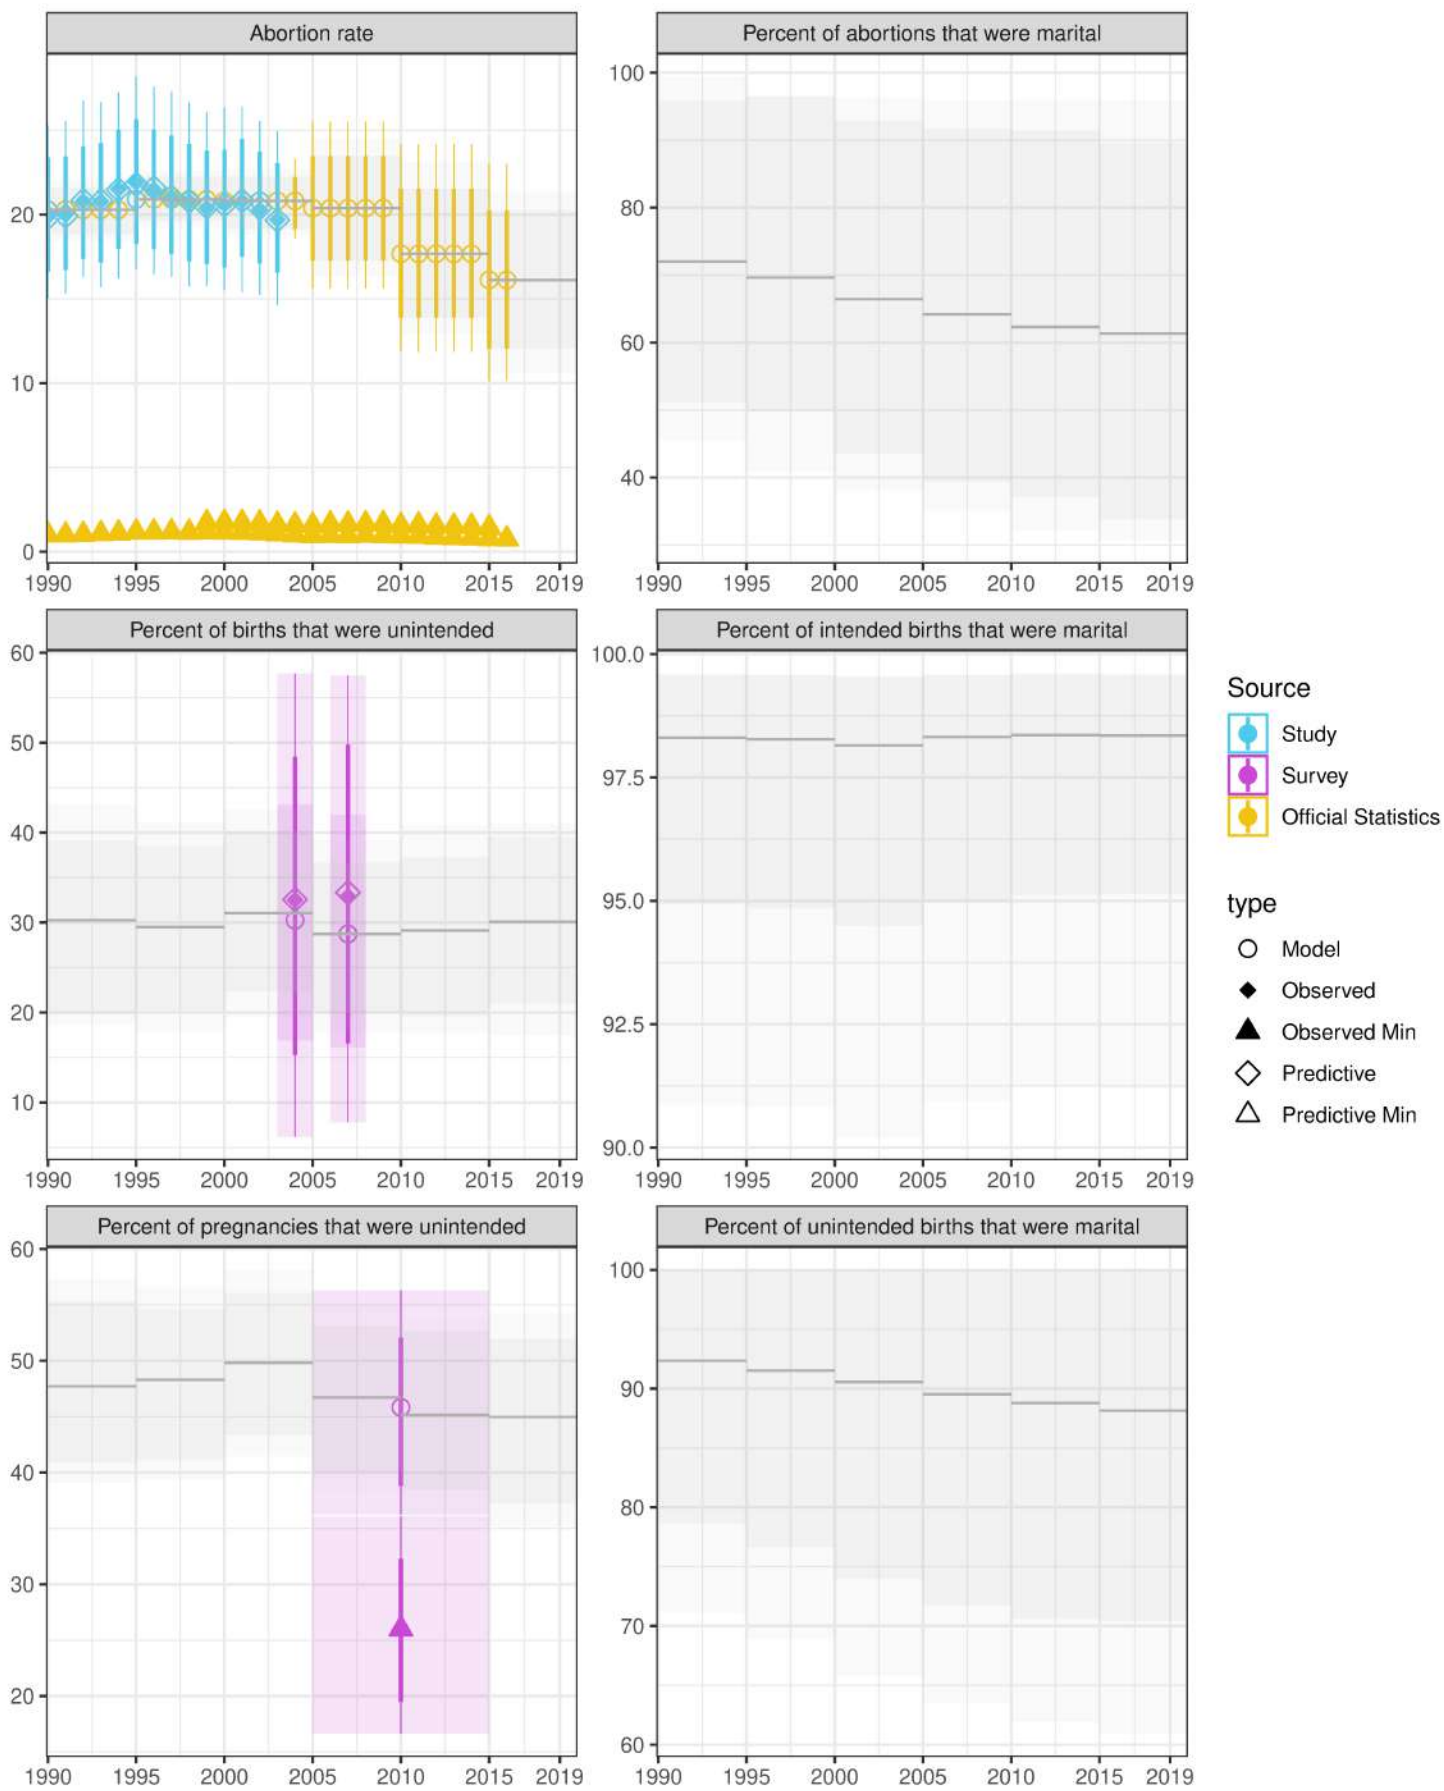

Note: Vertical lines and grey shading show 80% and 95% uncertainty intervals. Color shading shows when data were collected, if more than one year.

### New Zealand

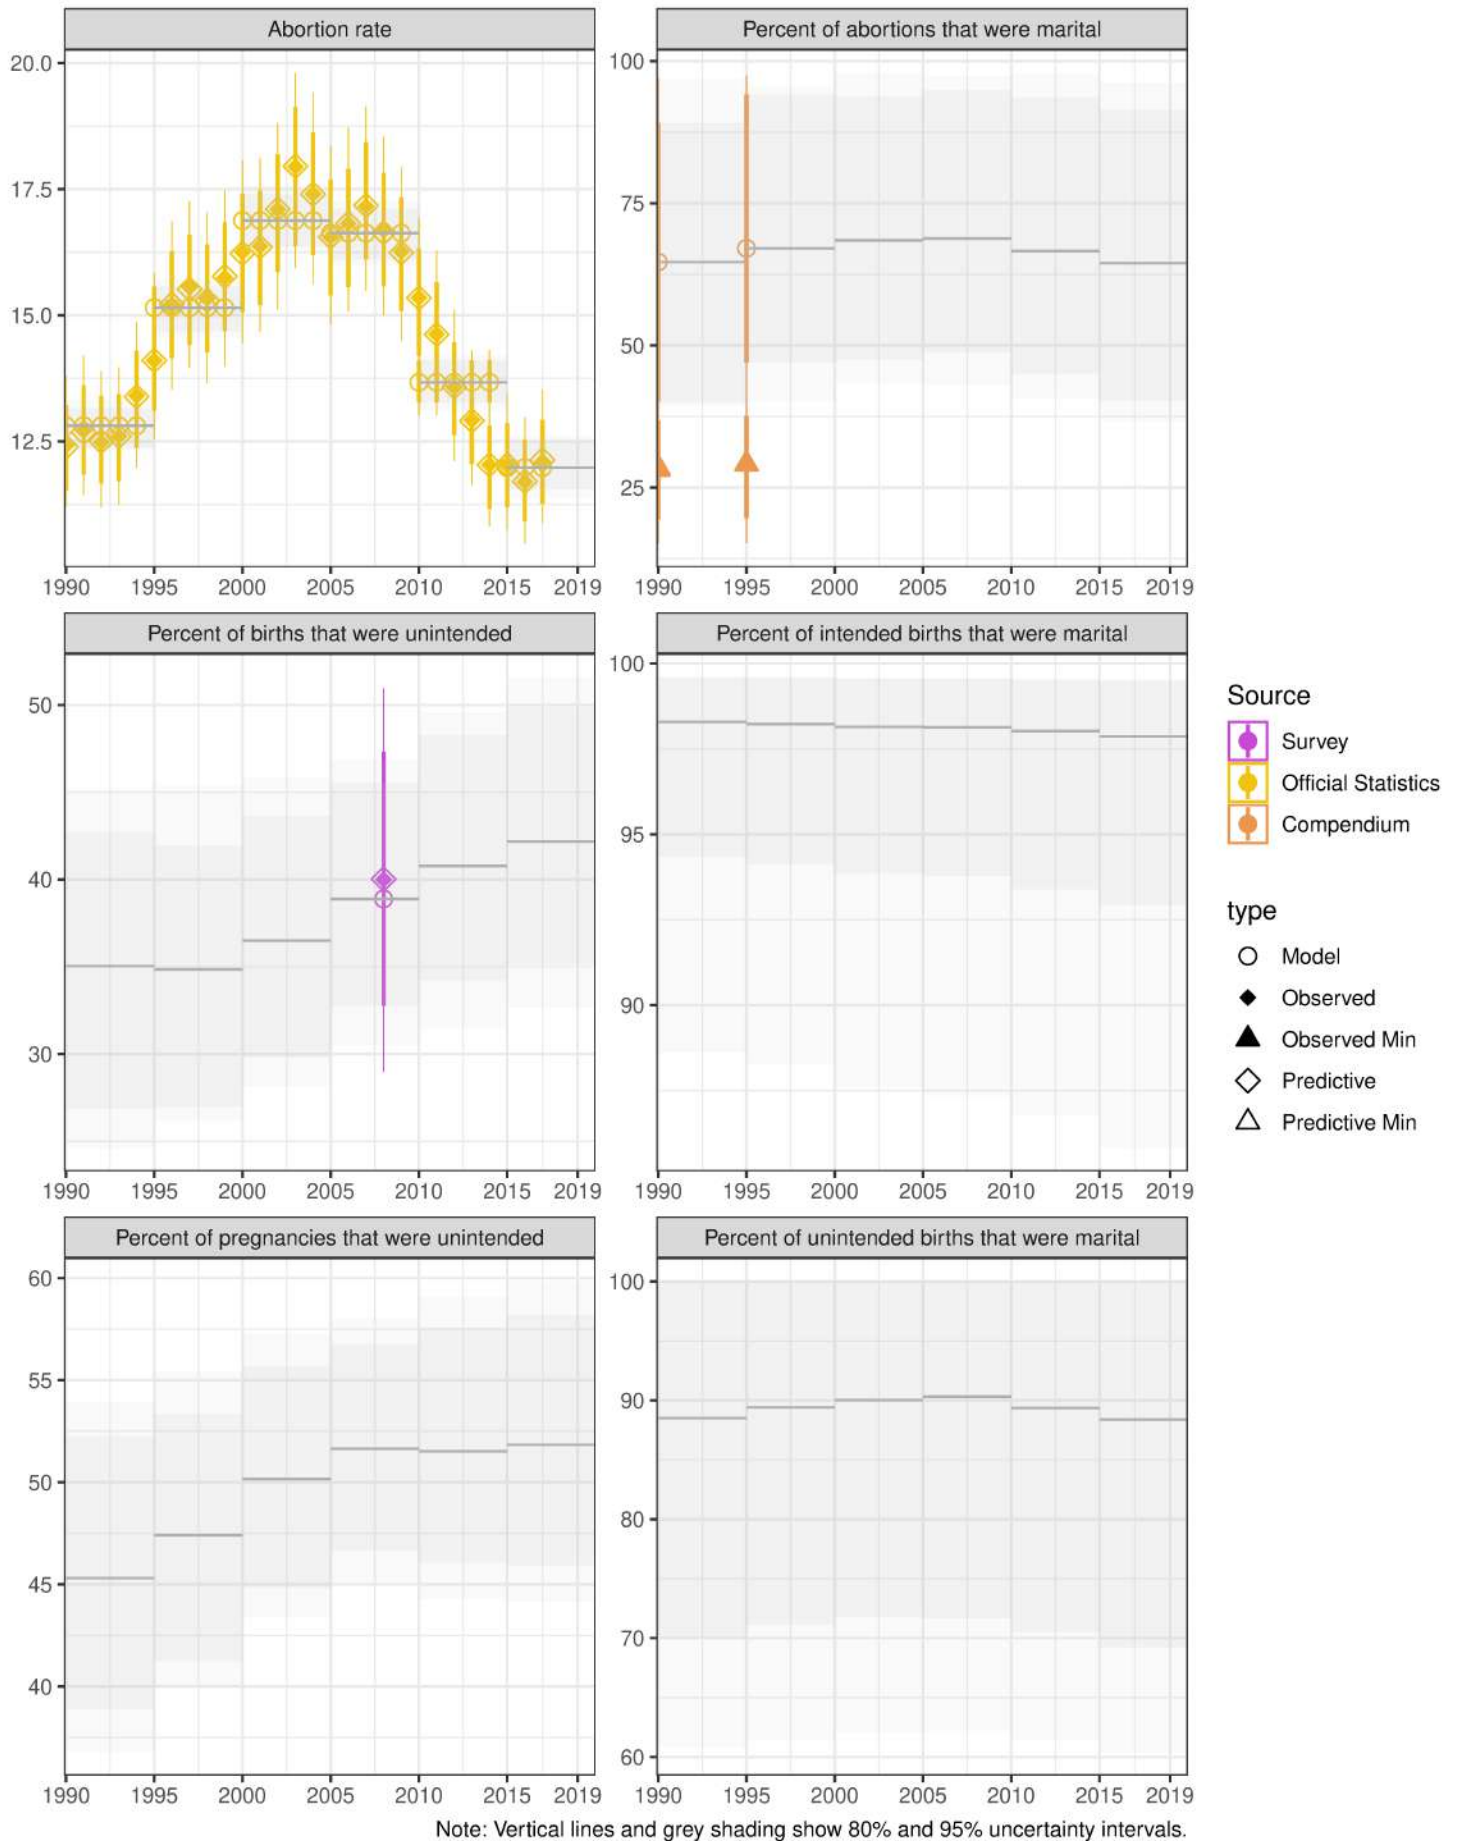

### Papua New Guinea

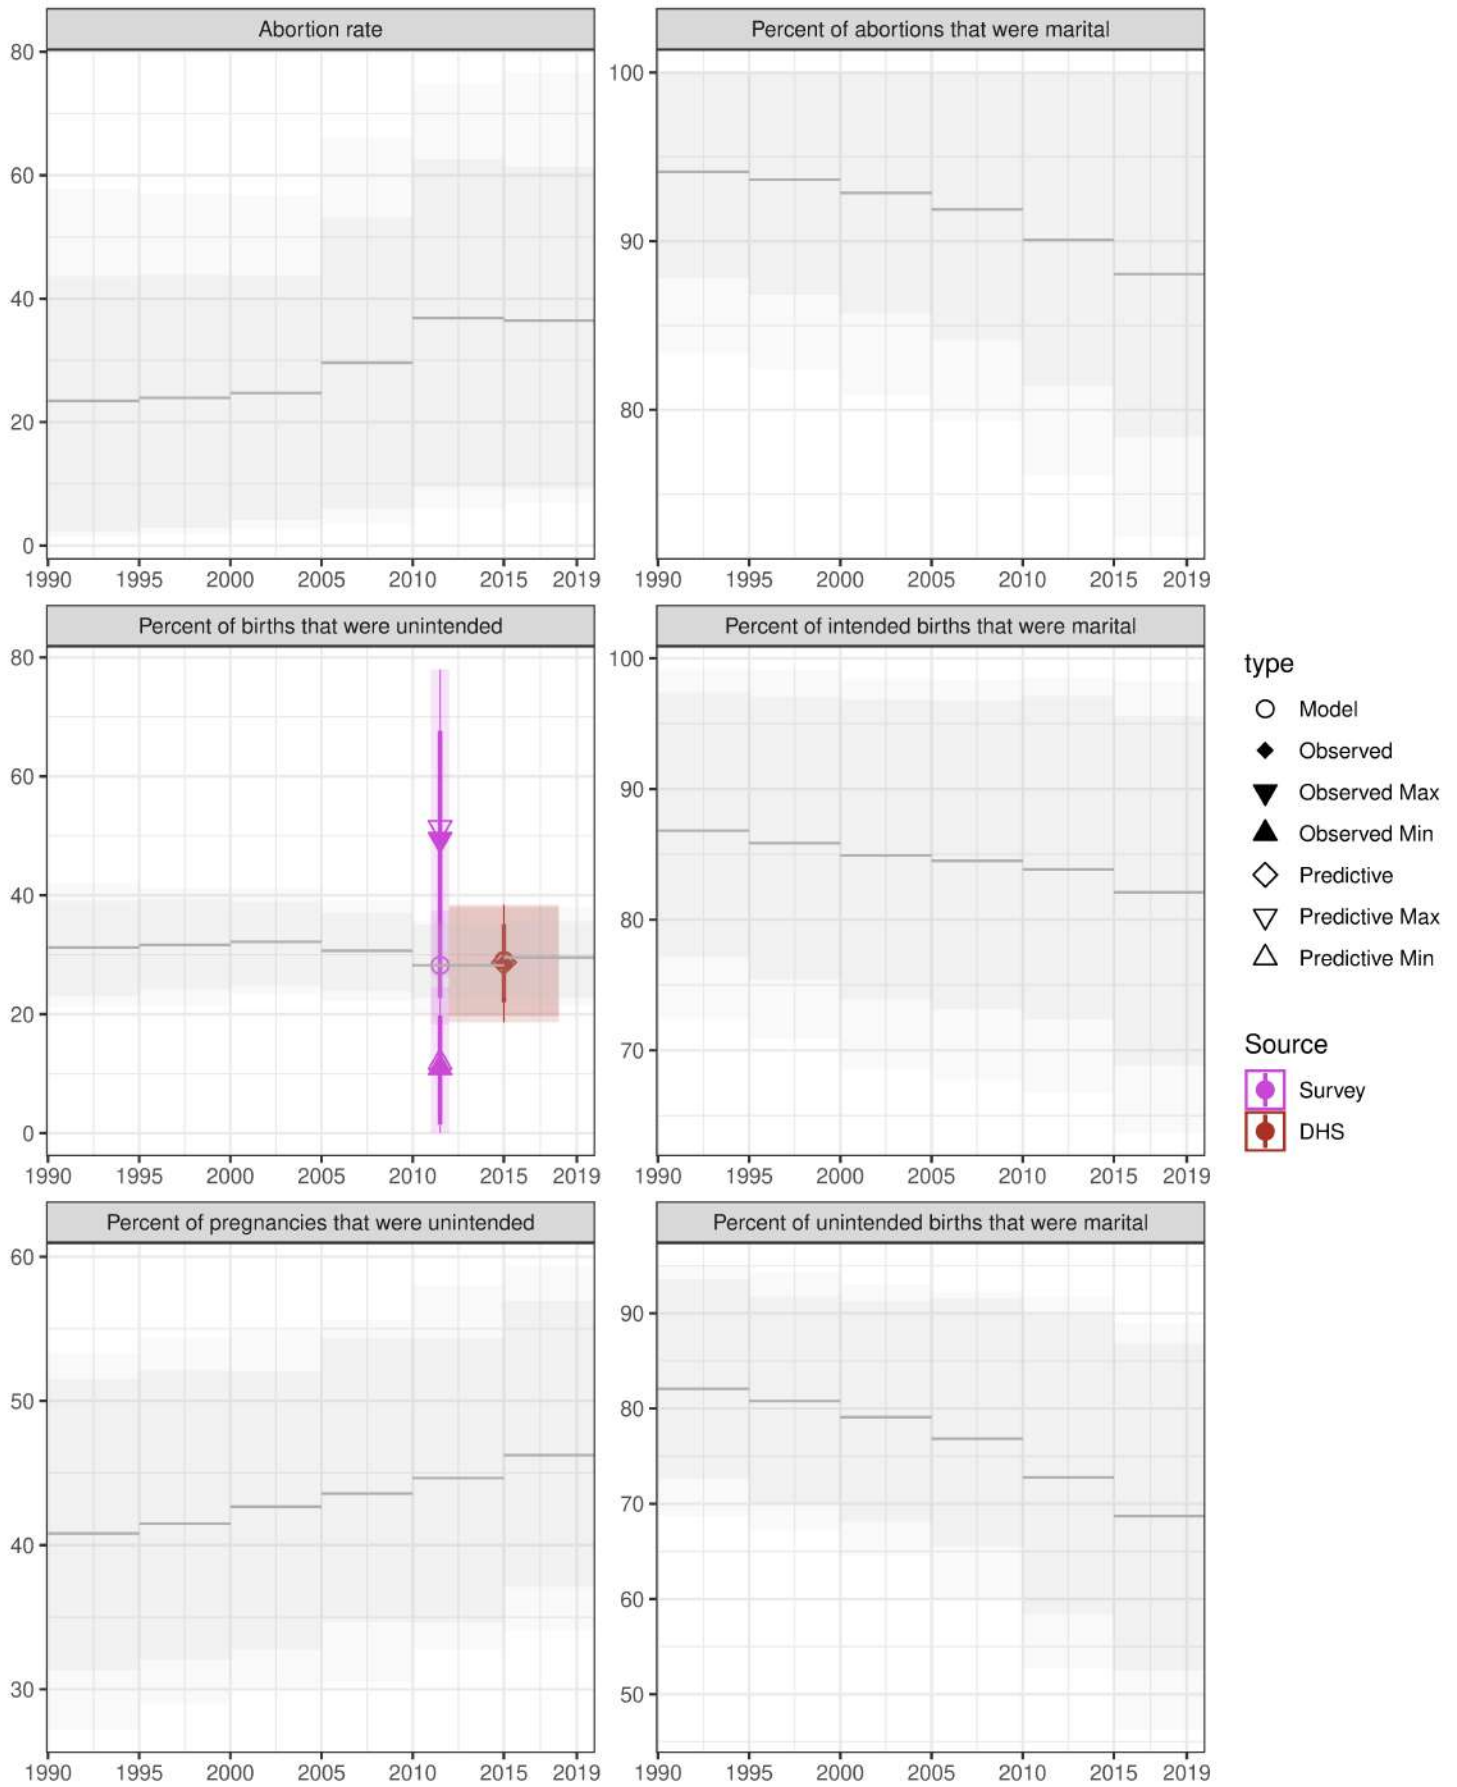

Note: Vertical lines and grey shading show 80% and 95% uncertainty intervals. Color shading shows when data were collected, if more than one year.

### Samoa

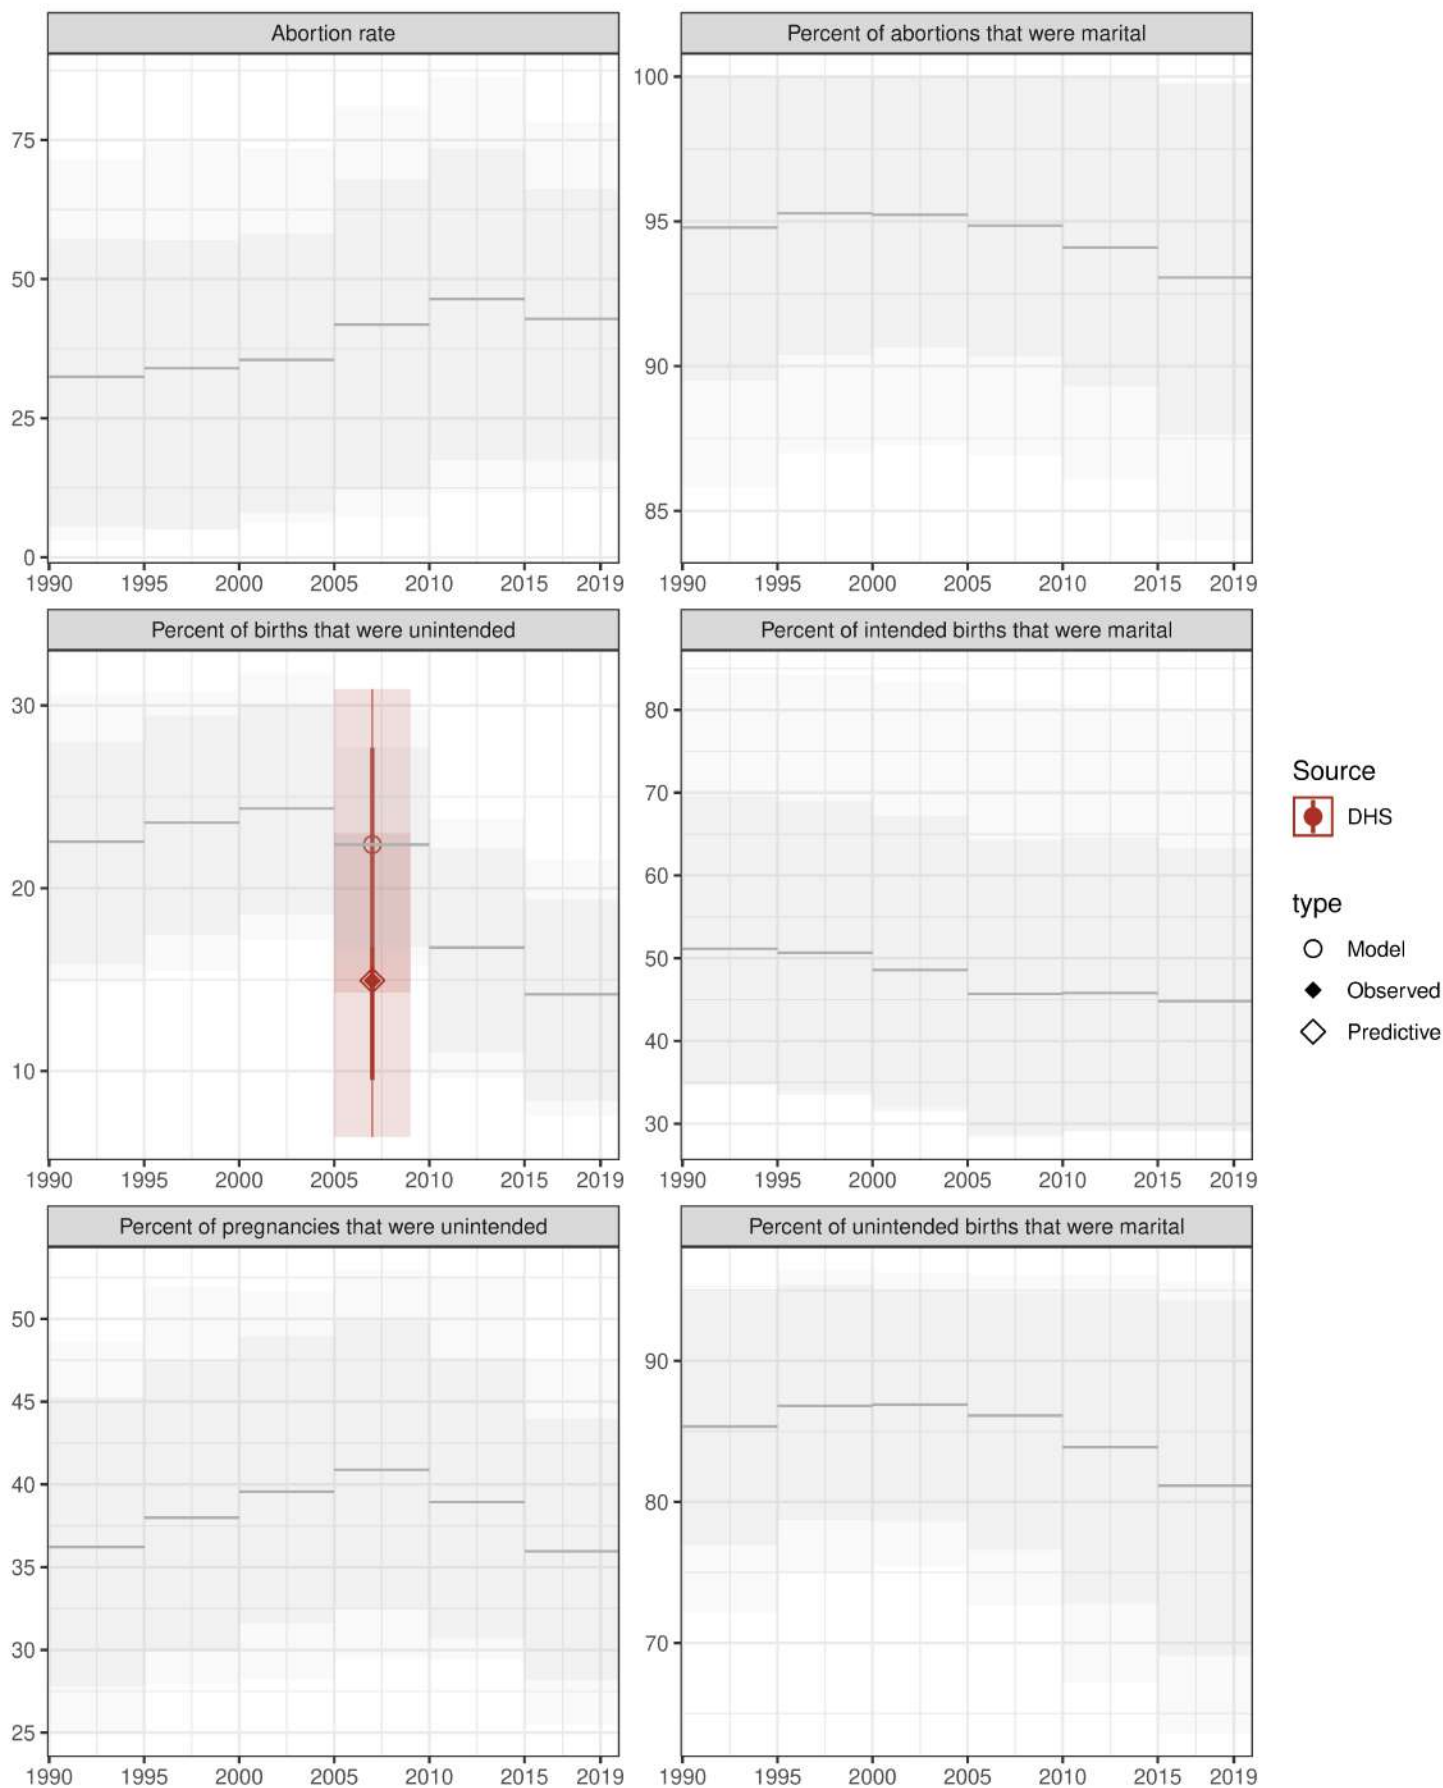

Note: Vertical lines and grey shading show 80% and 95% uncertainty intervals. Color shading shows when data were collected, if more than one year.

### Solomon Islands

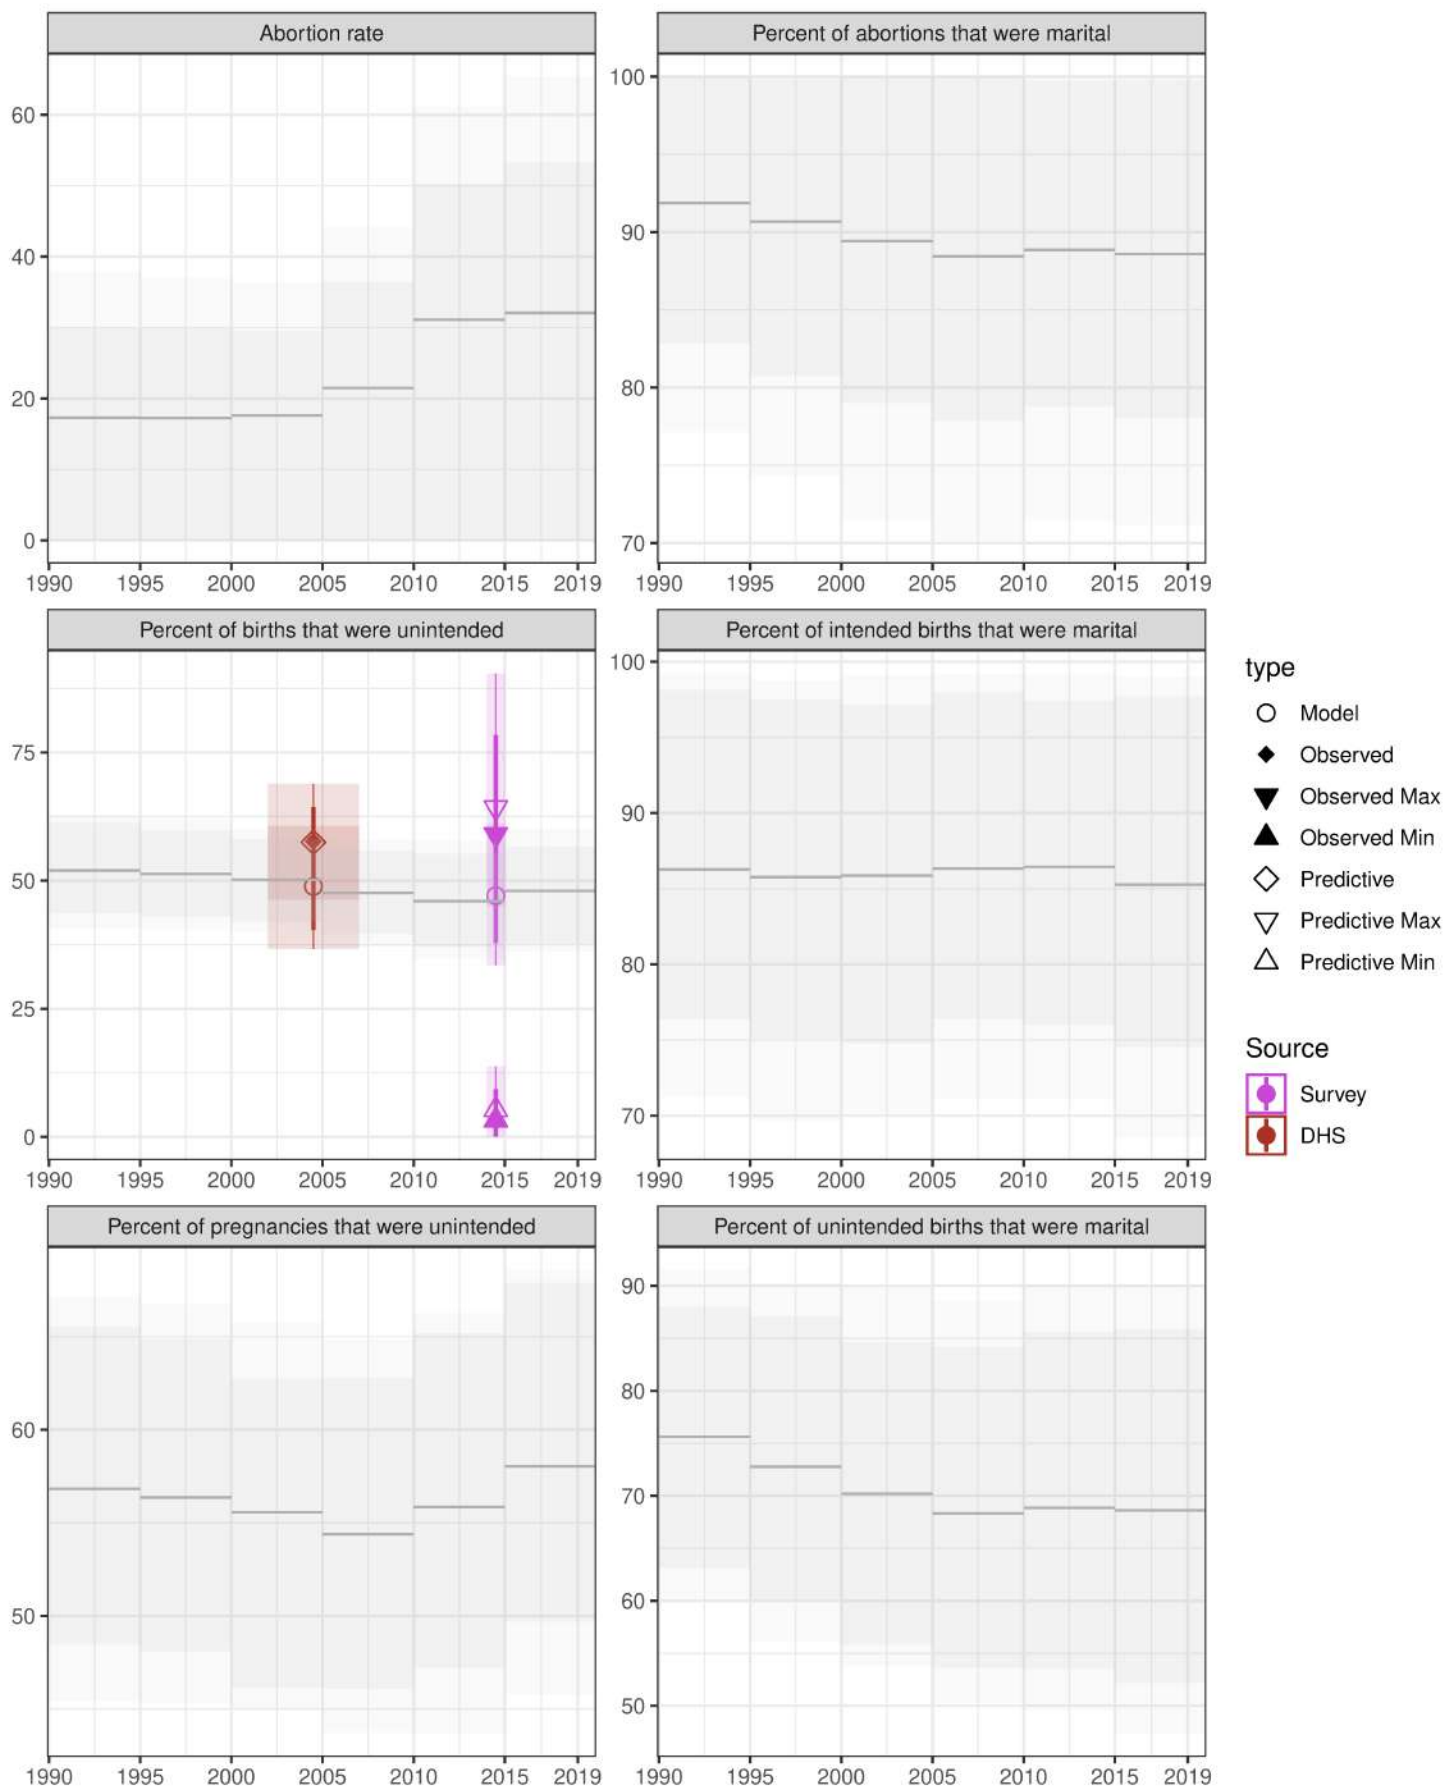

Note: Vertical lines and grey shading show 80% and 95% uncertainty intervals. Color shading shows when data were collected, if more than one year.



### Vanuatu

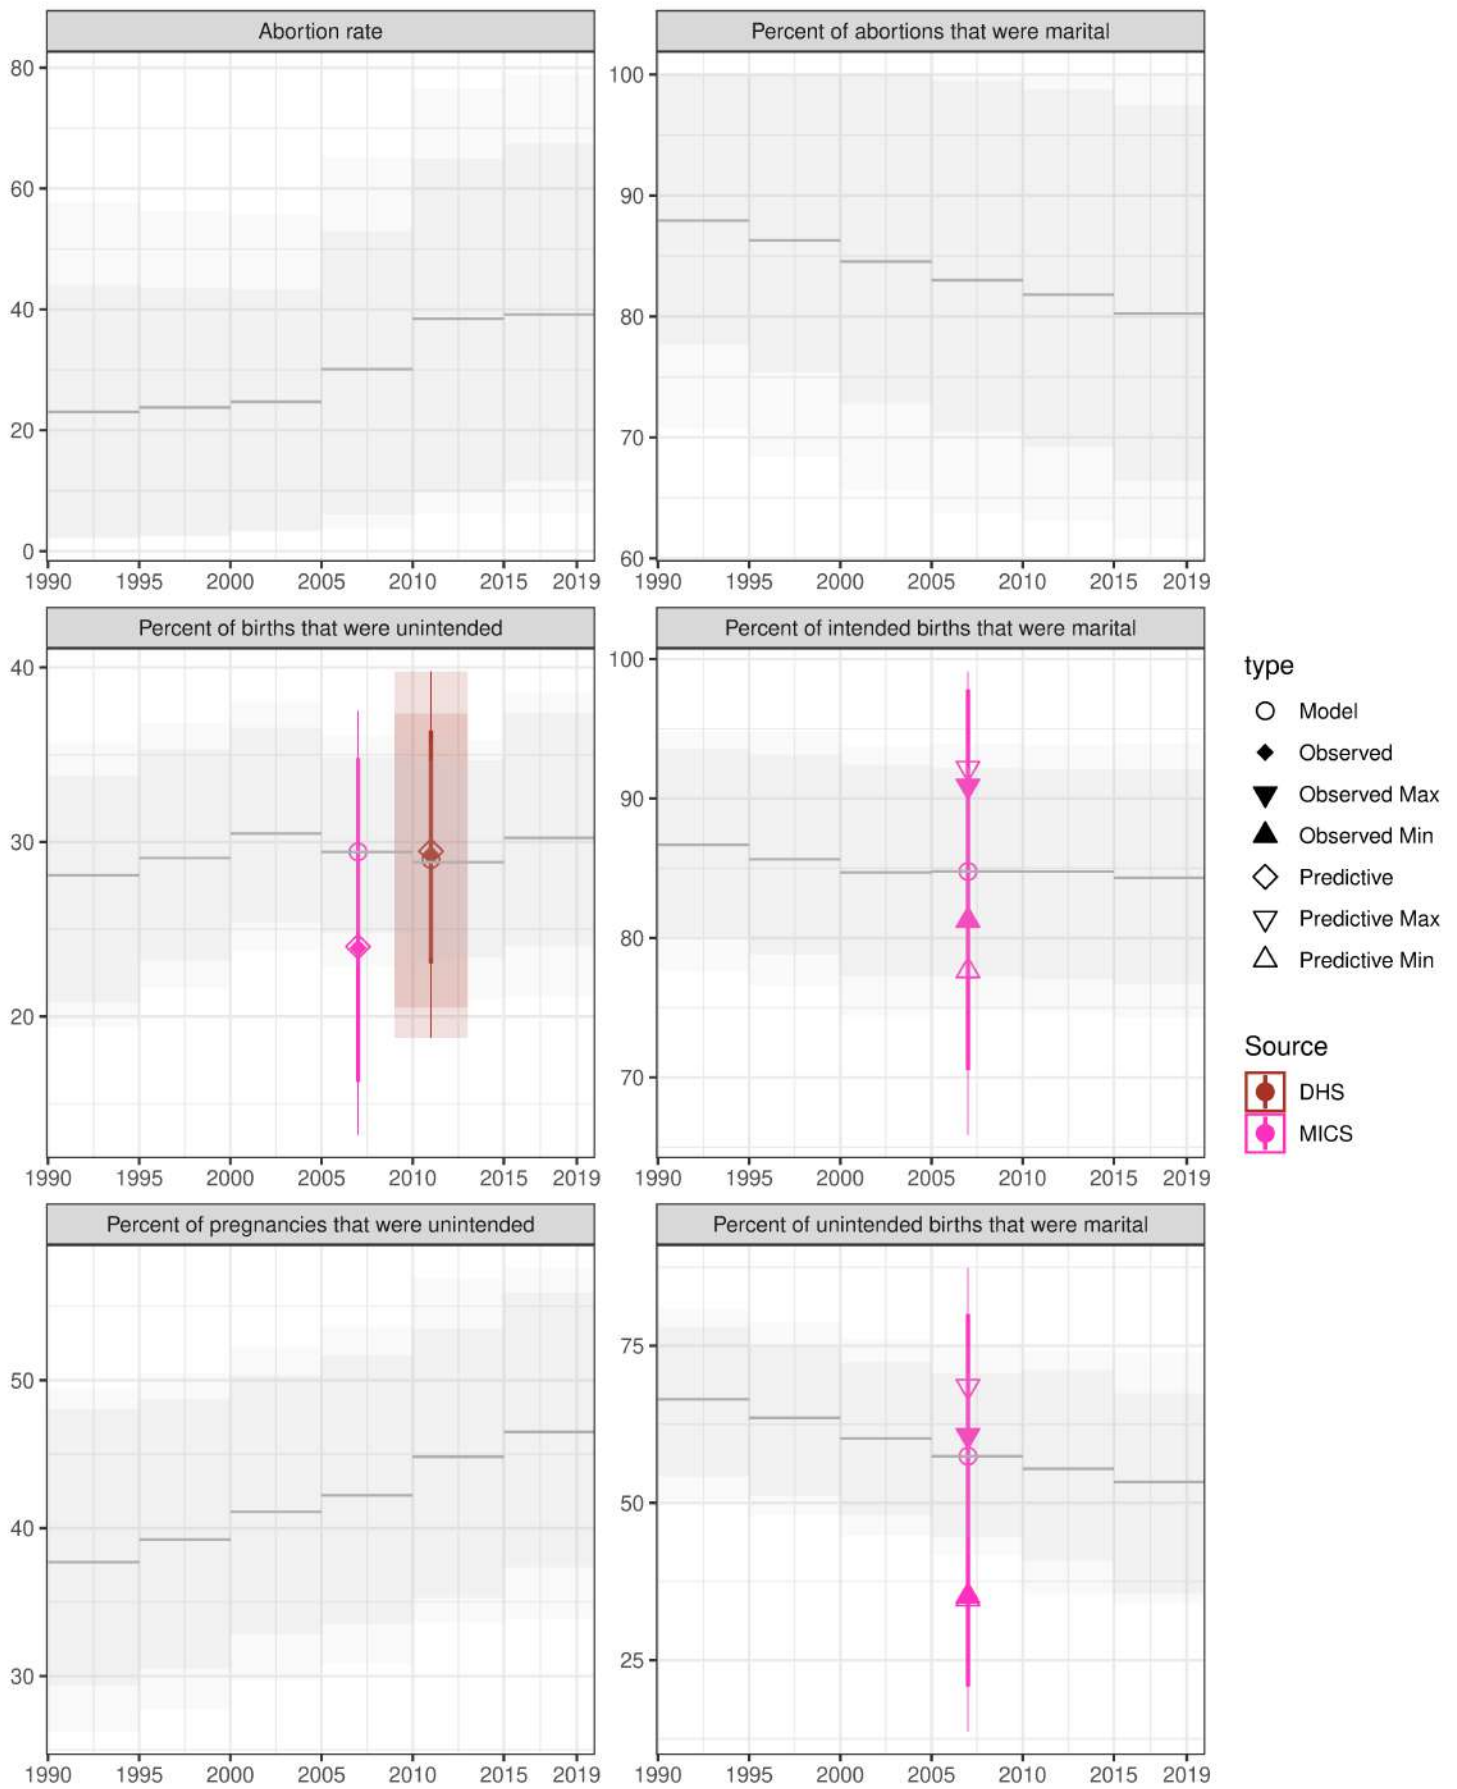

Note: Vertical lines and grey shading show 80% and 95% uncertainty intervals. Color shading shows when data were collected, if more than one year.

## **7 Europe and Northern America**

### **7.1 Eastern Europe**

### Belarus

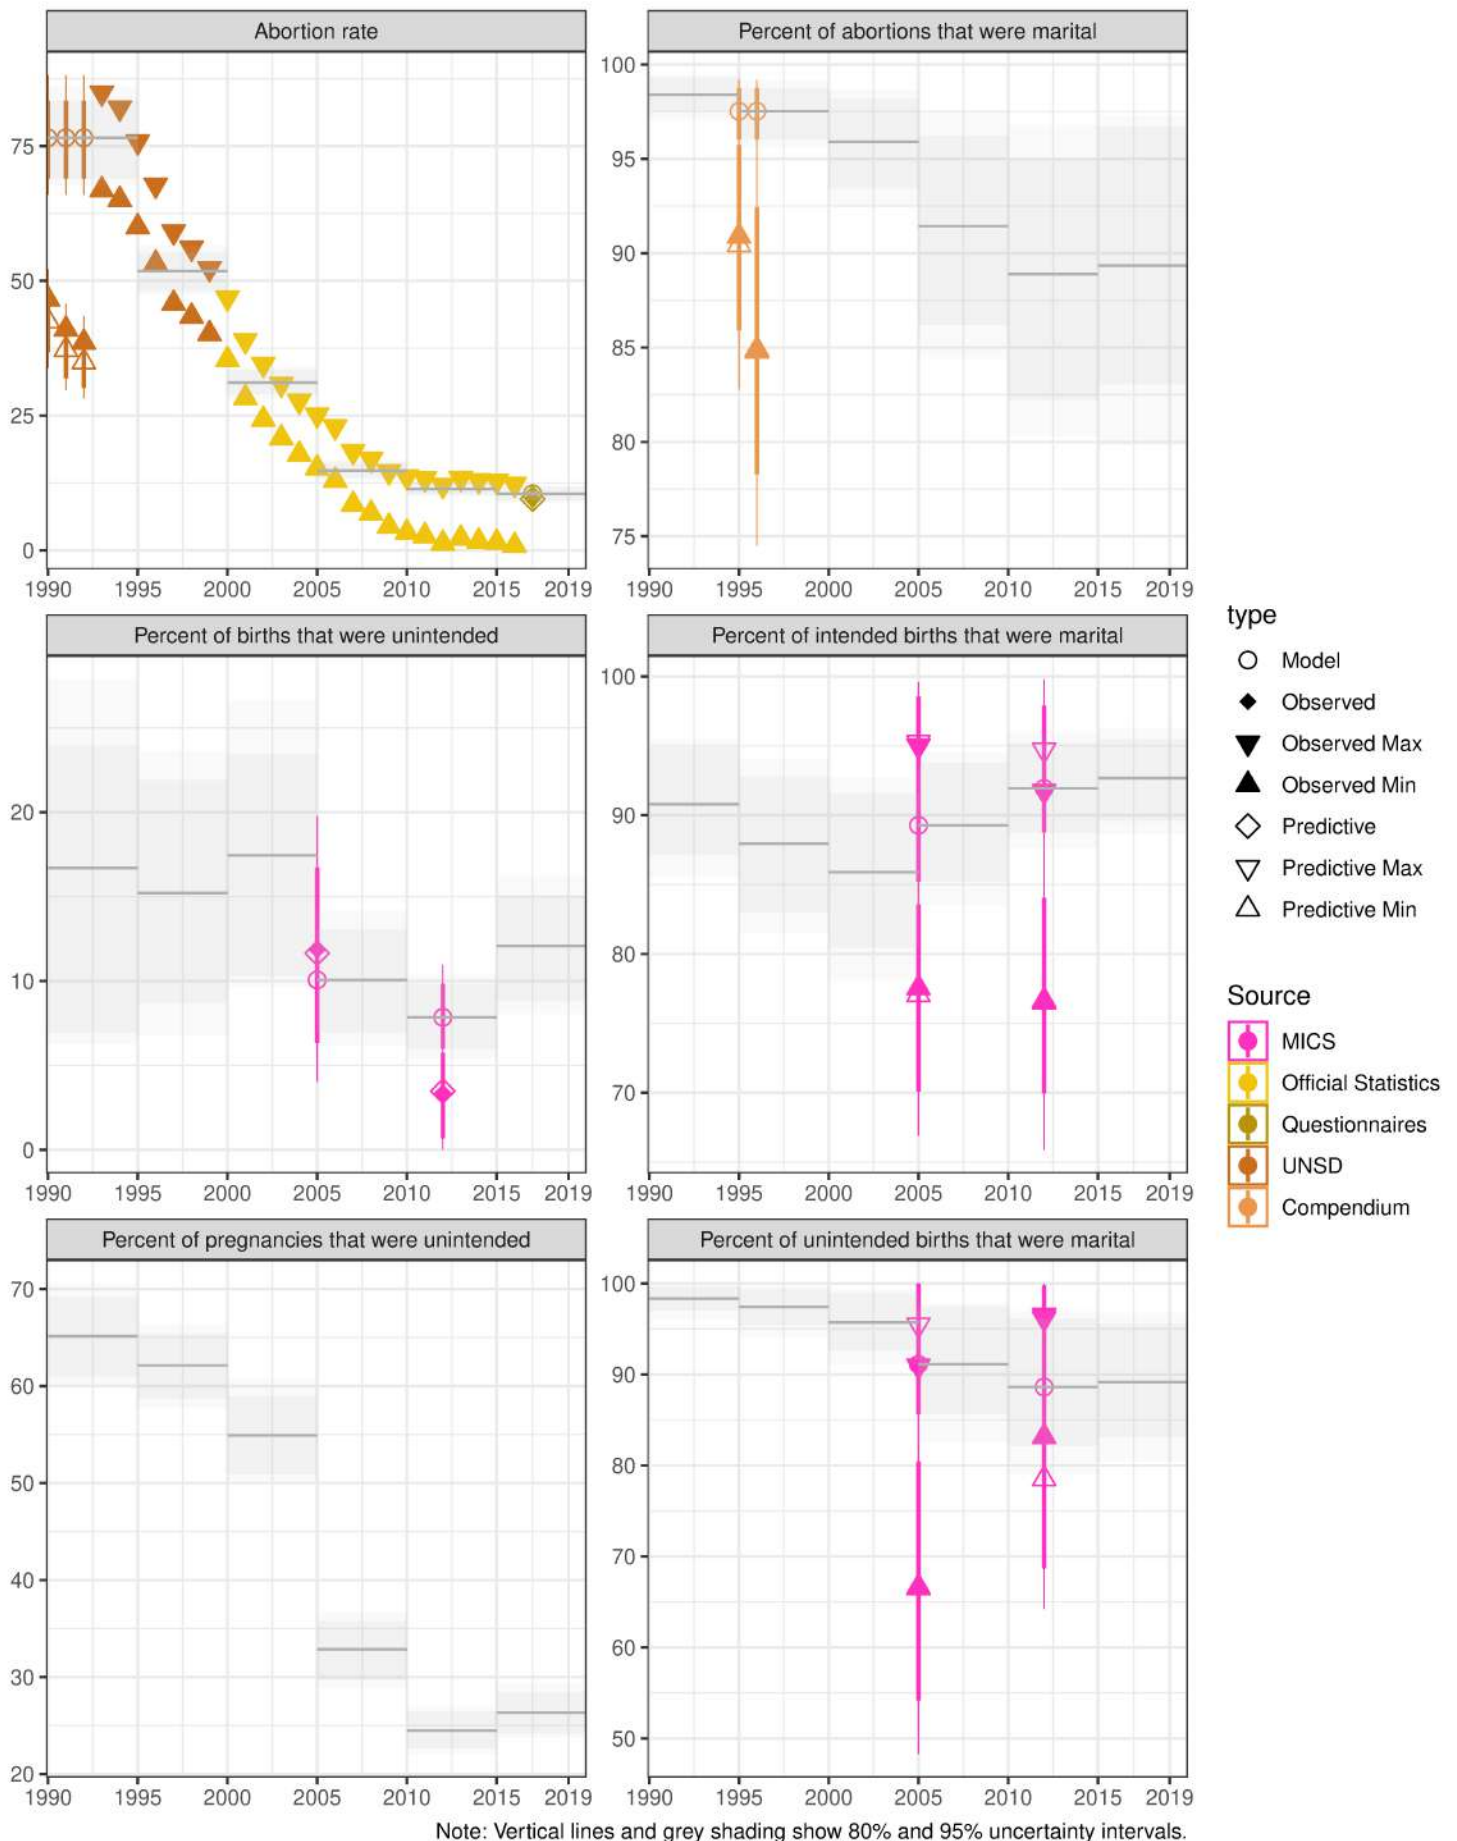

### Bulgaria

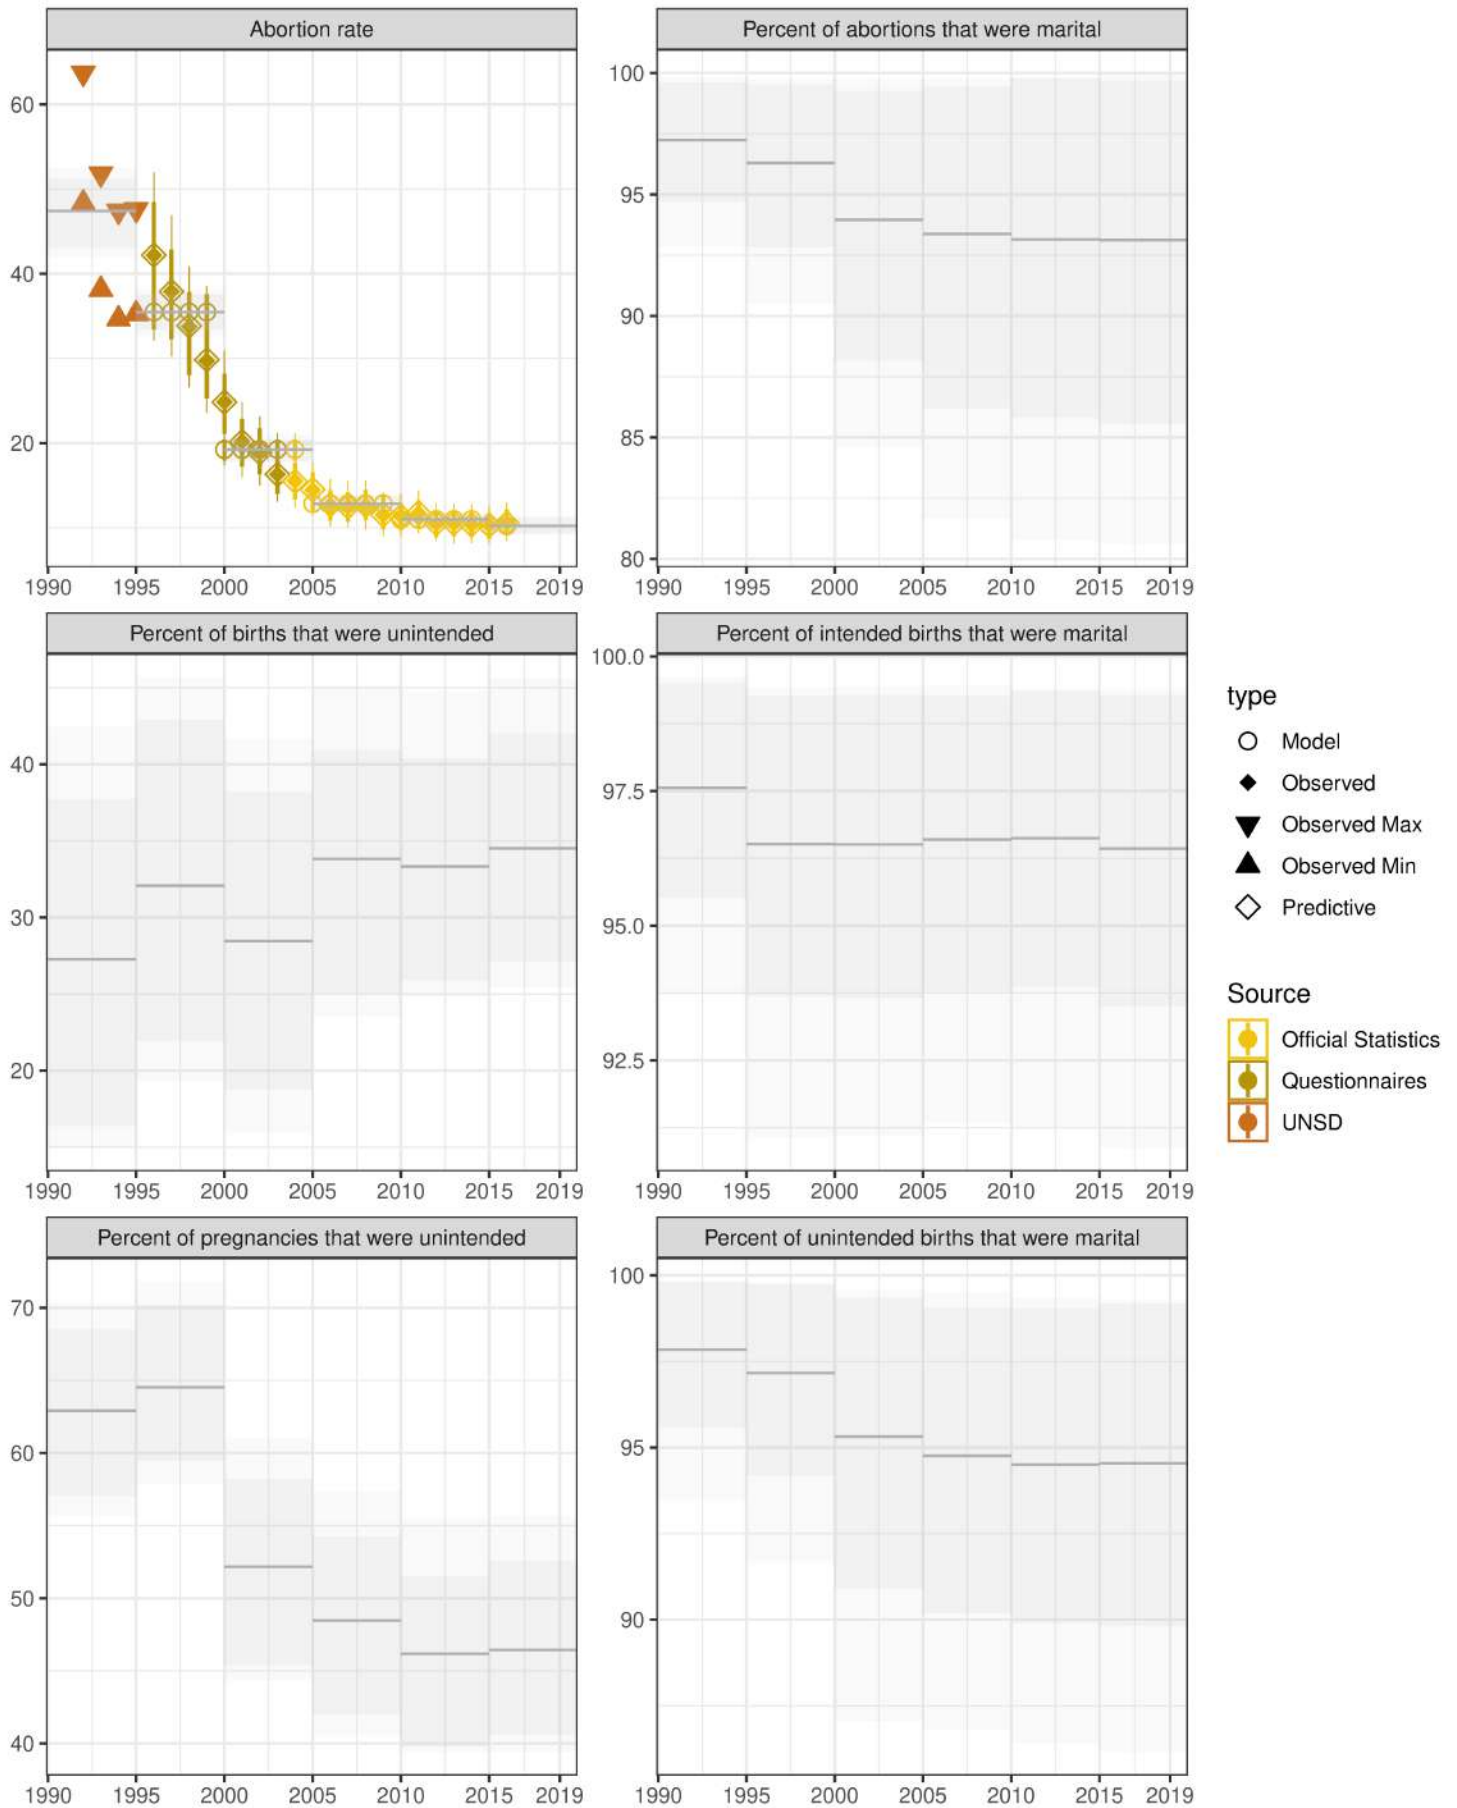

### Czechia

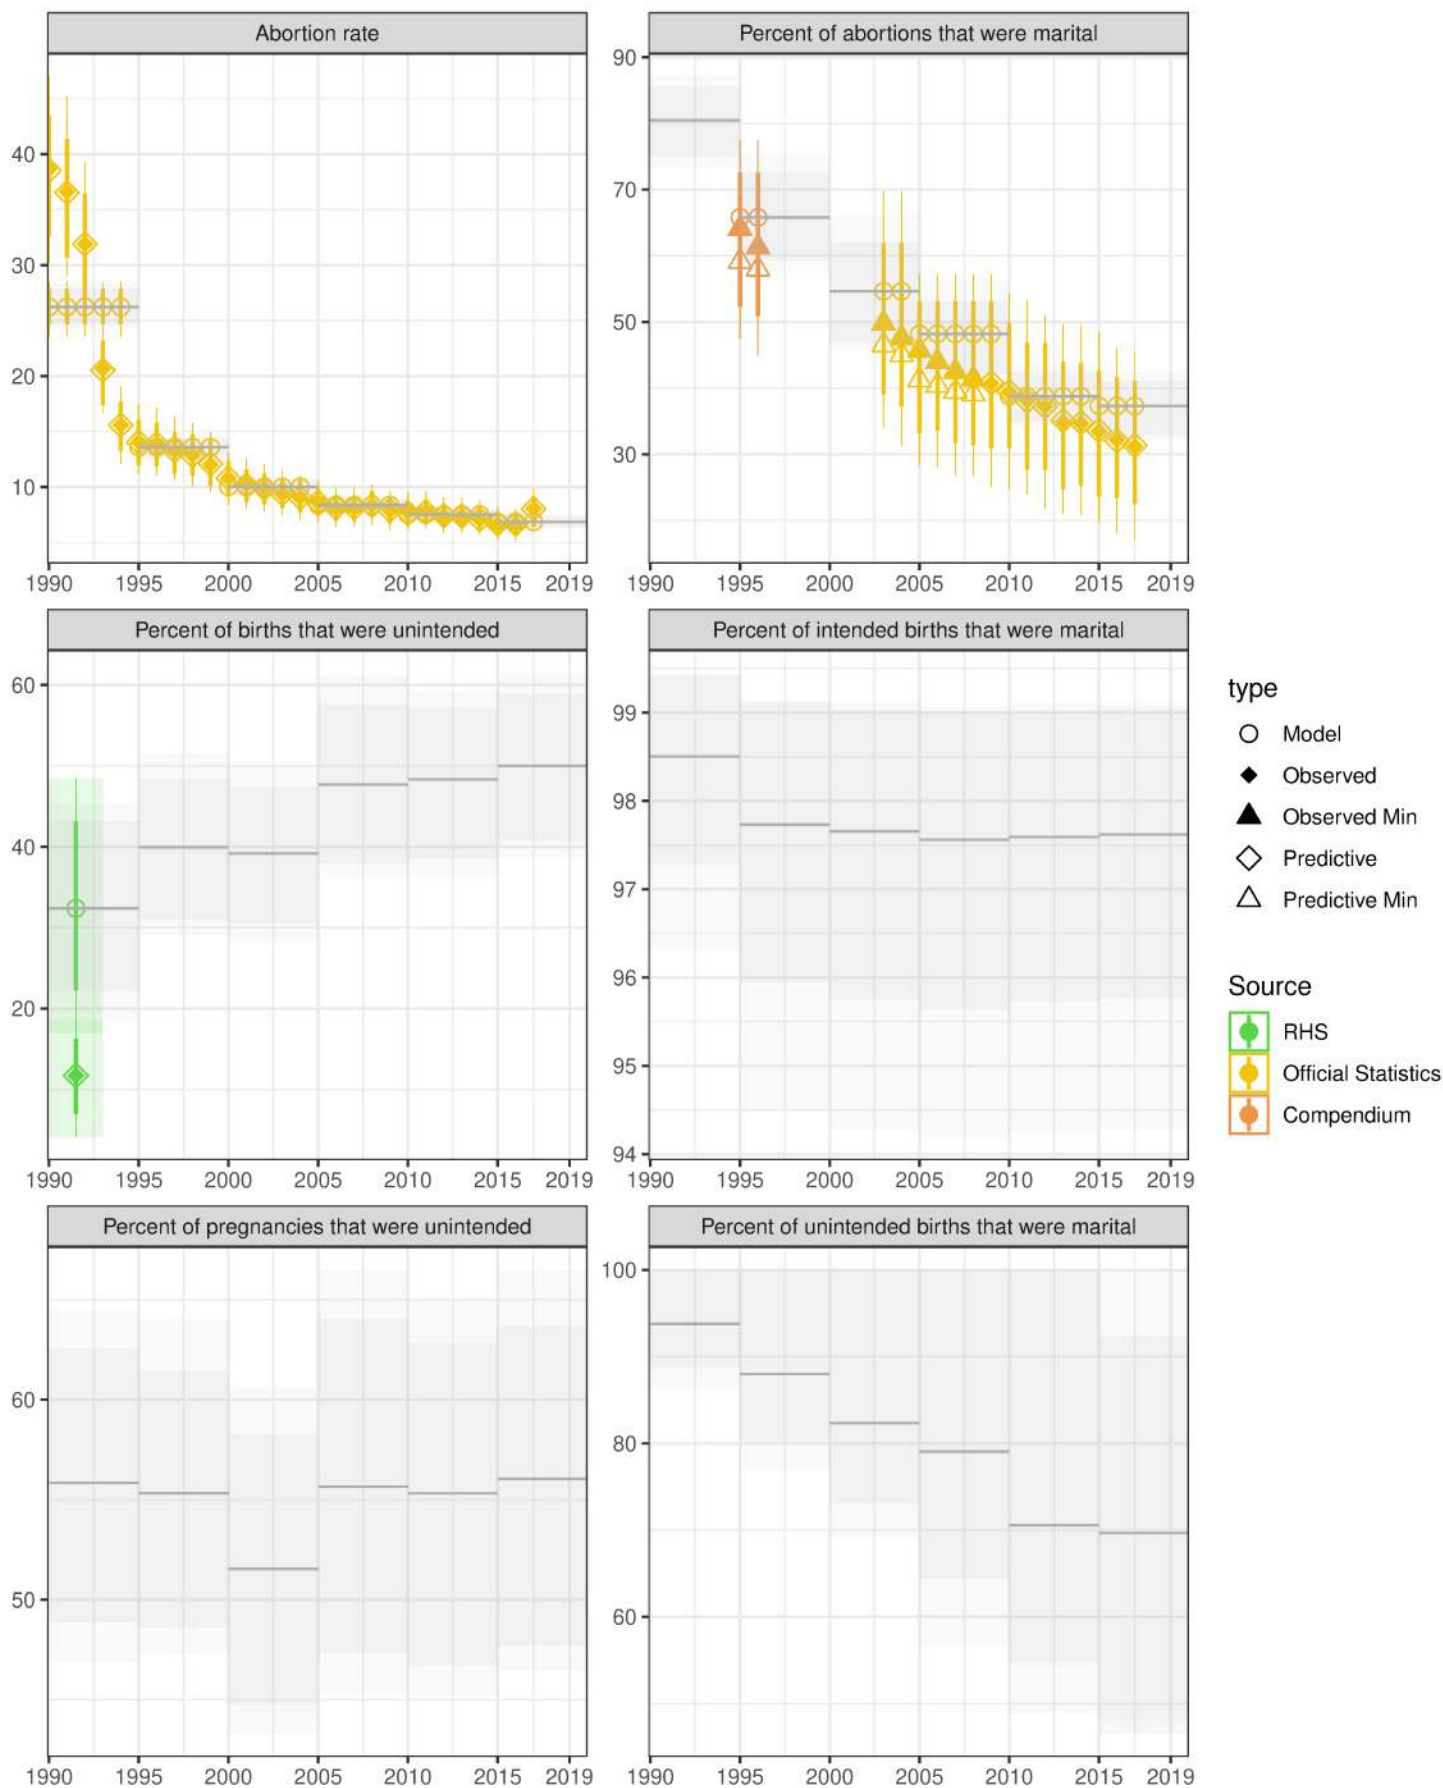

Note: Vertical lines and grey shading show 80% and 95% uncertainty intervals. Color shading shows when data were collected, if more than one year.

### Hungary

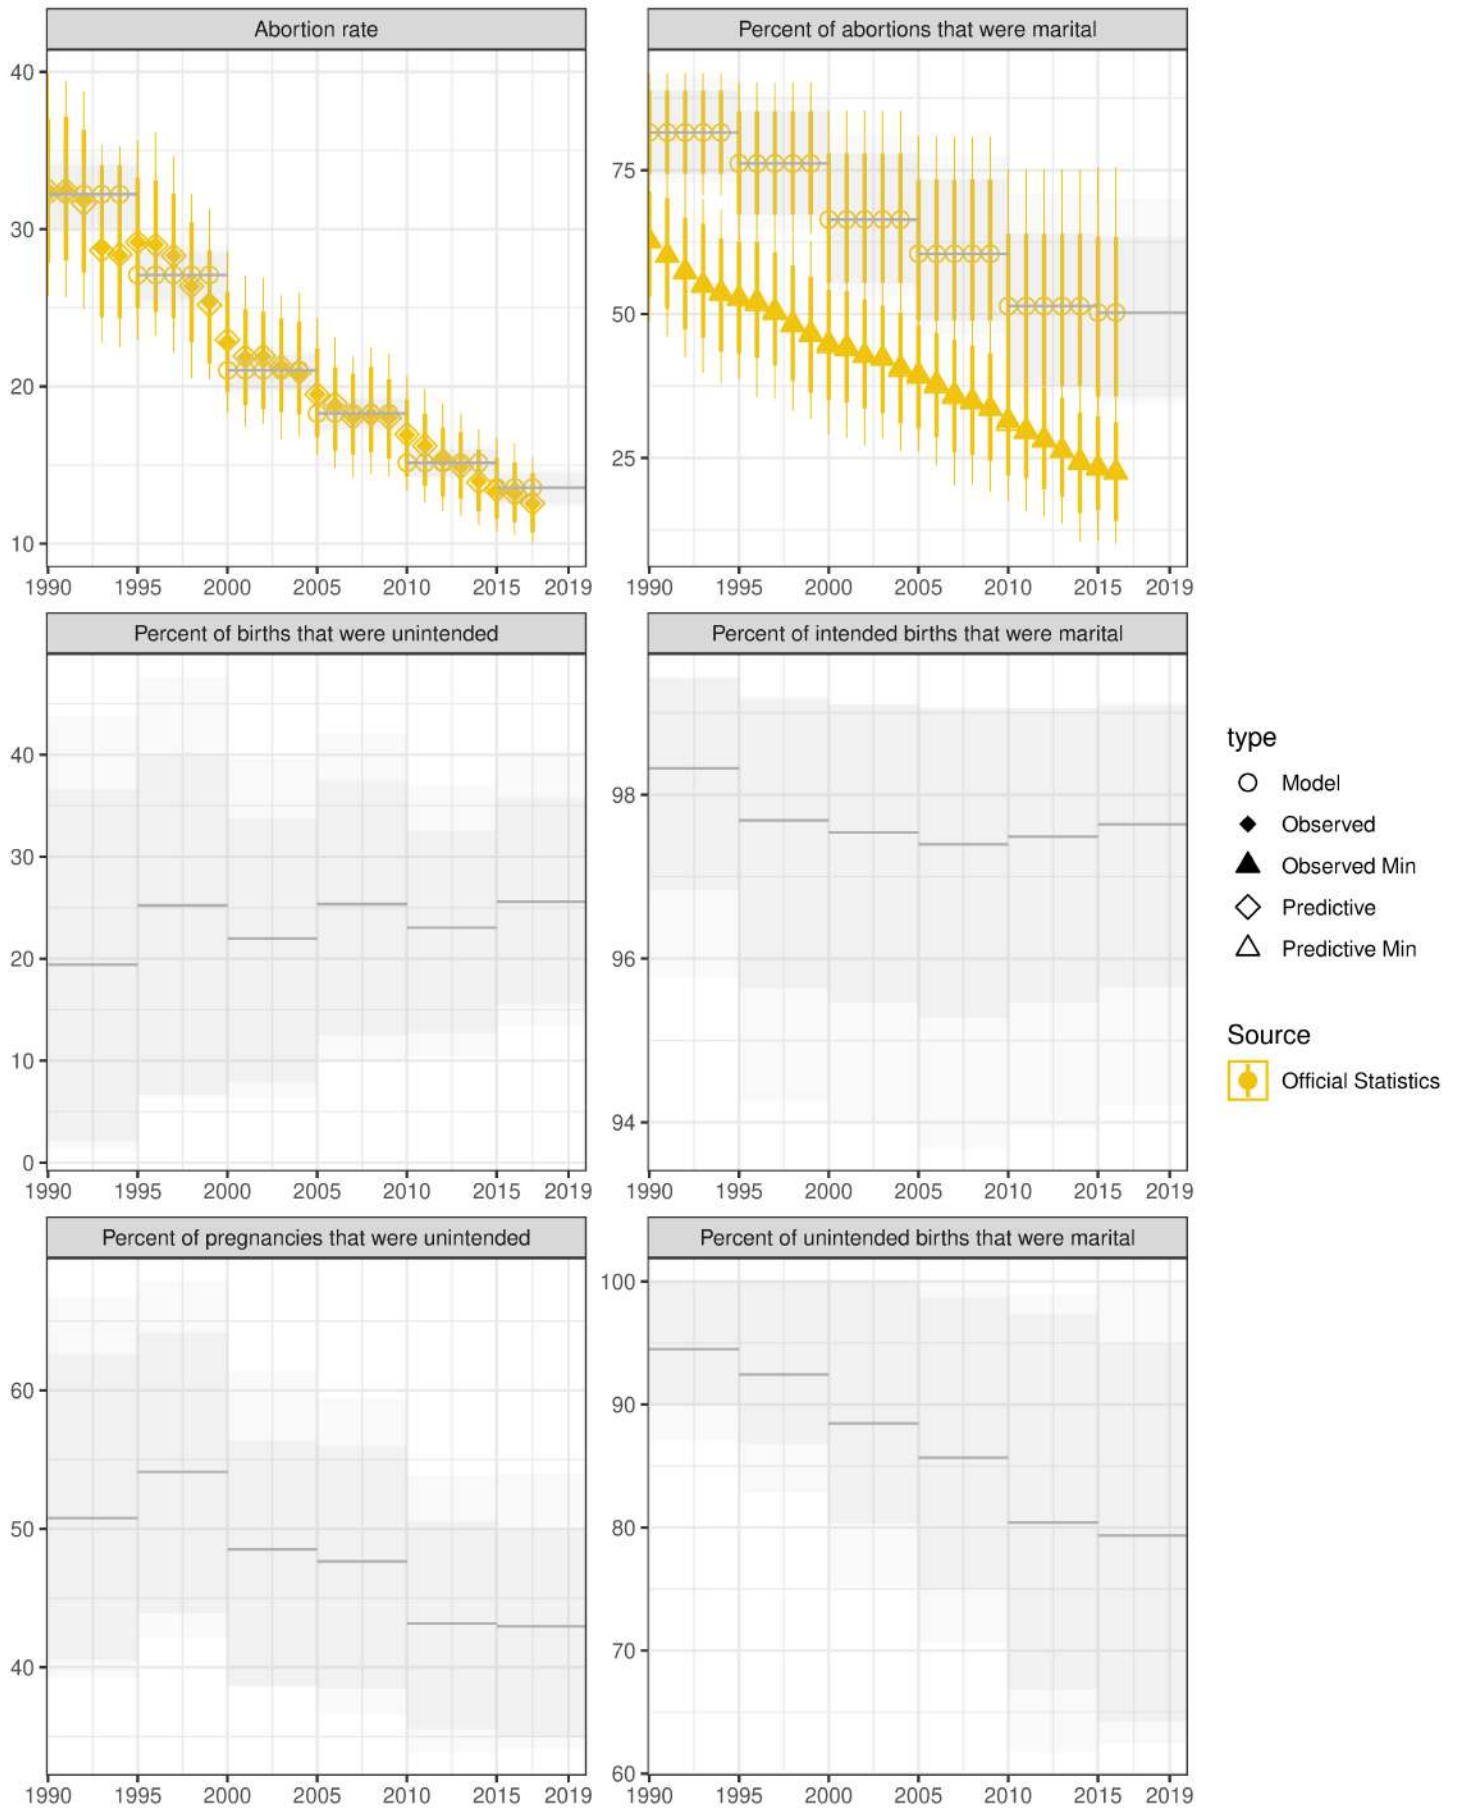

Note: Vertical lines and grey shading show 80% and 95% uncertainty intervals.

Moldova

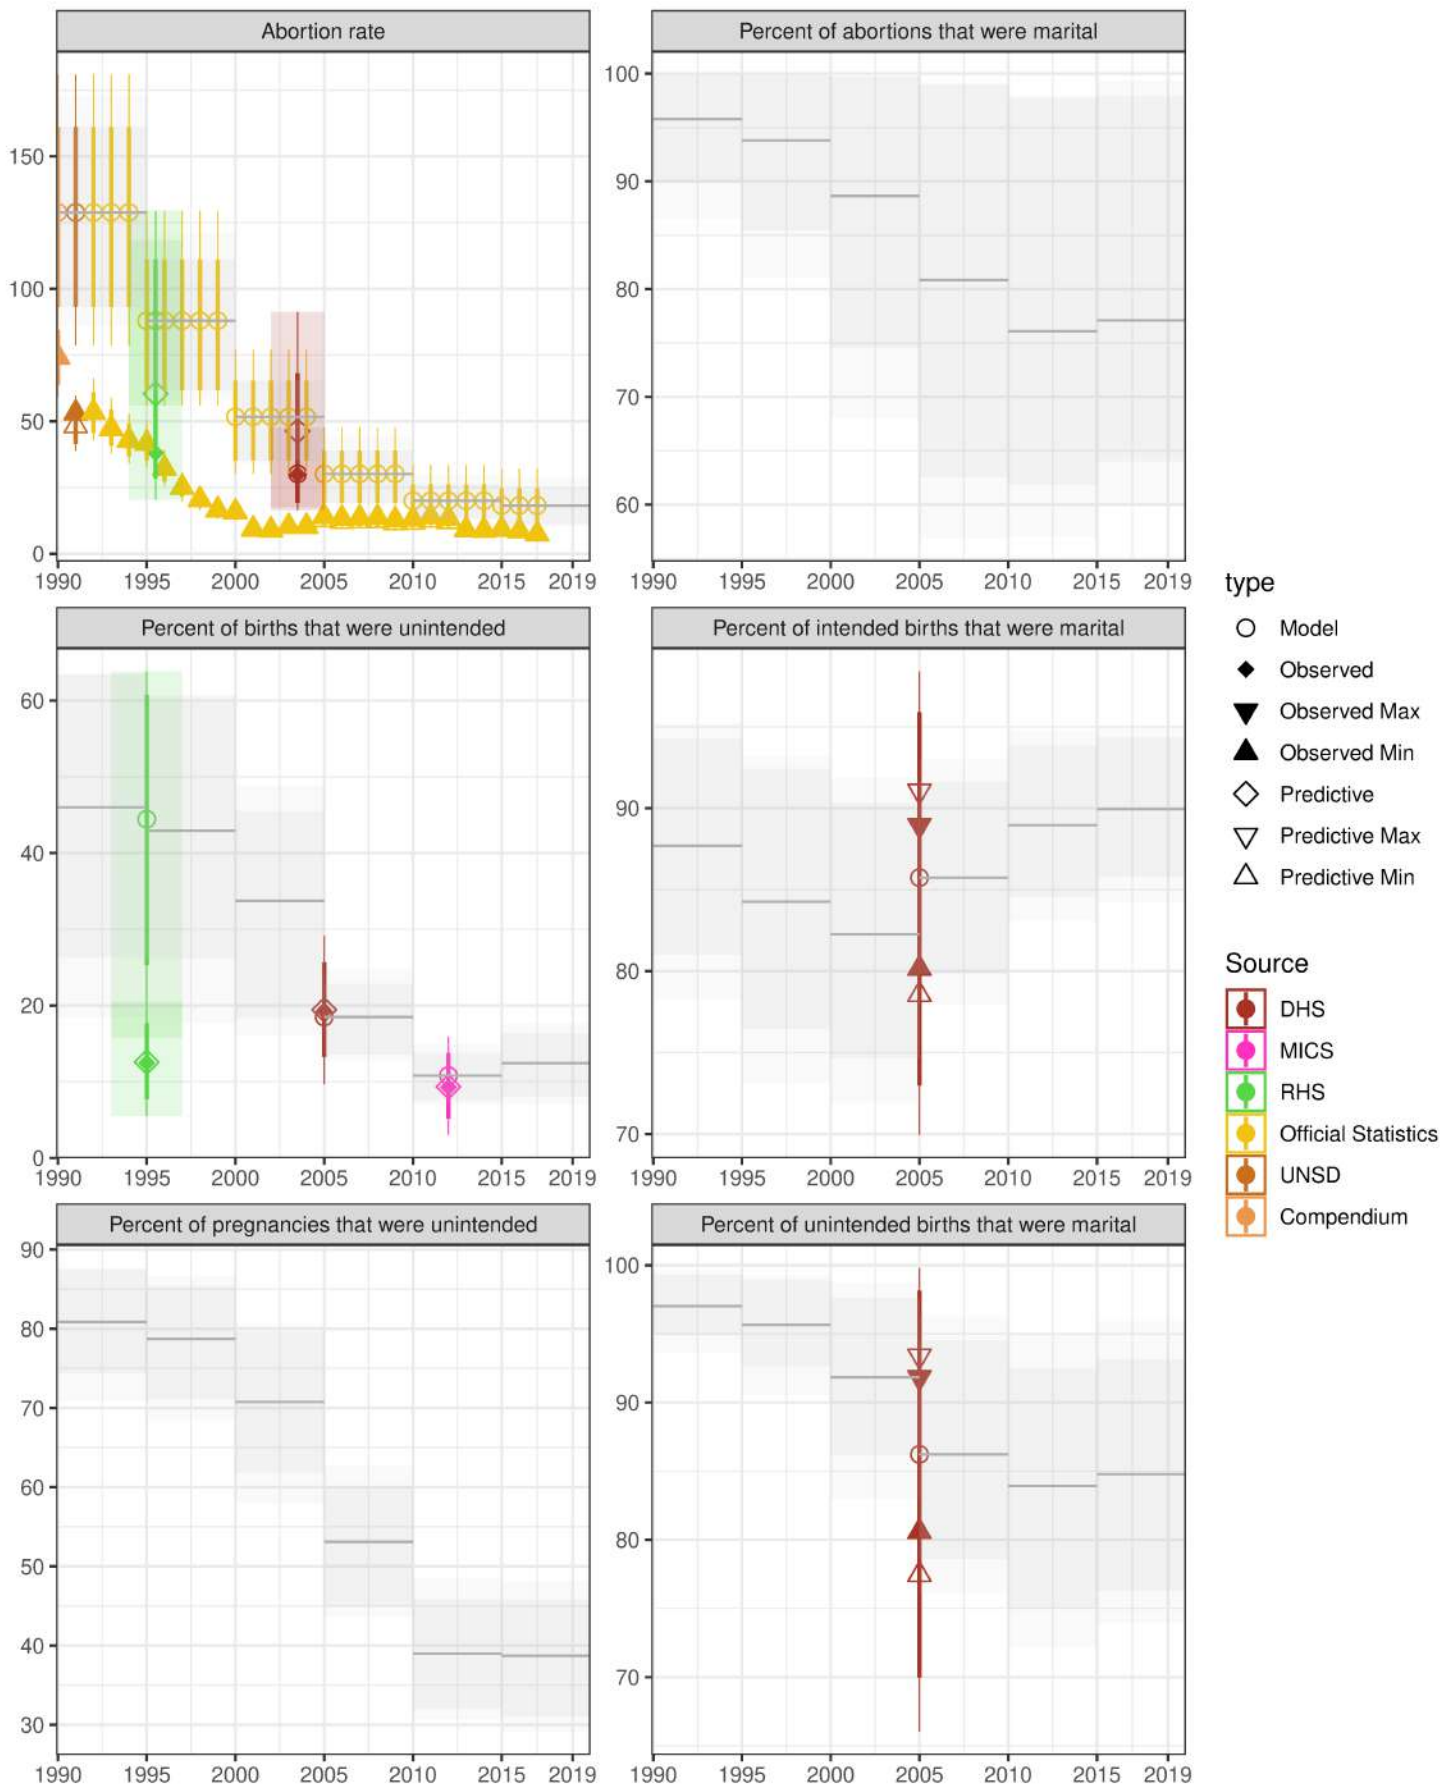

Note: Vertical lines and grey shading show 80% and 95% uncertainty intervals. Color shading shows when data were collected, if more than one year.

### Poland

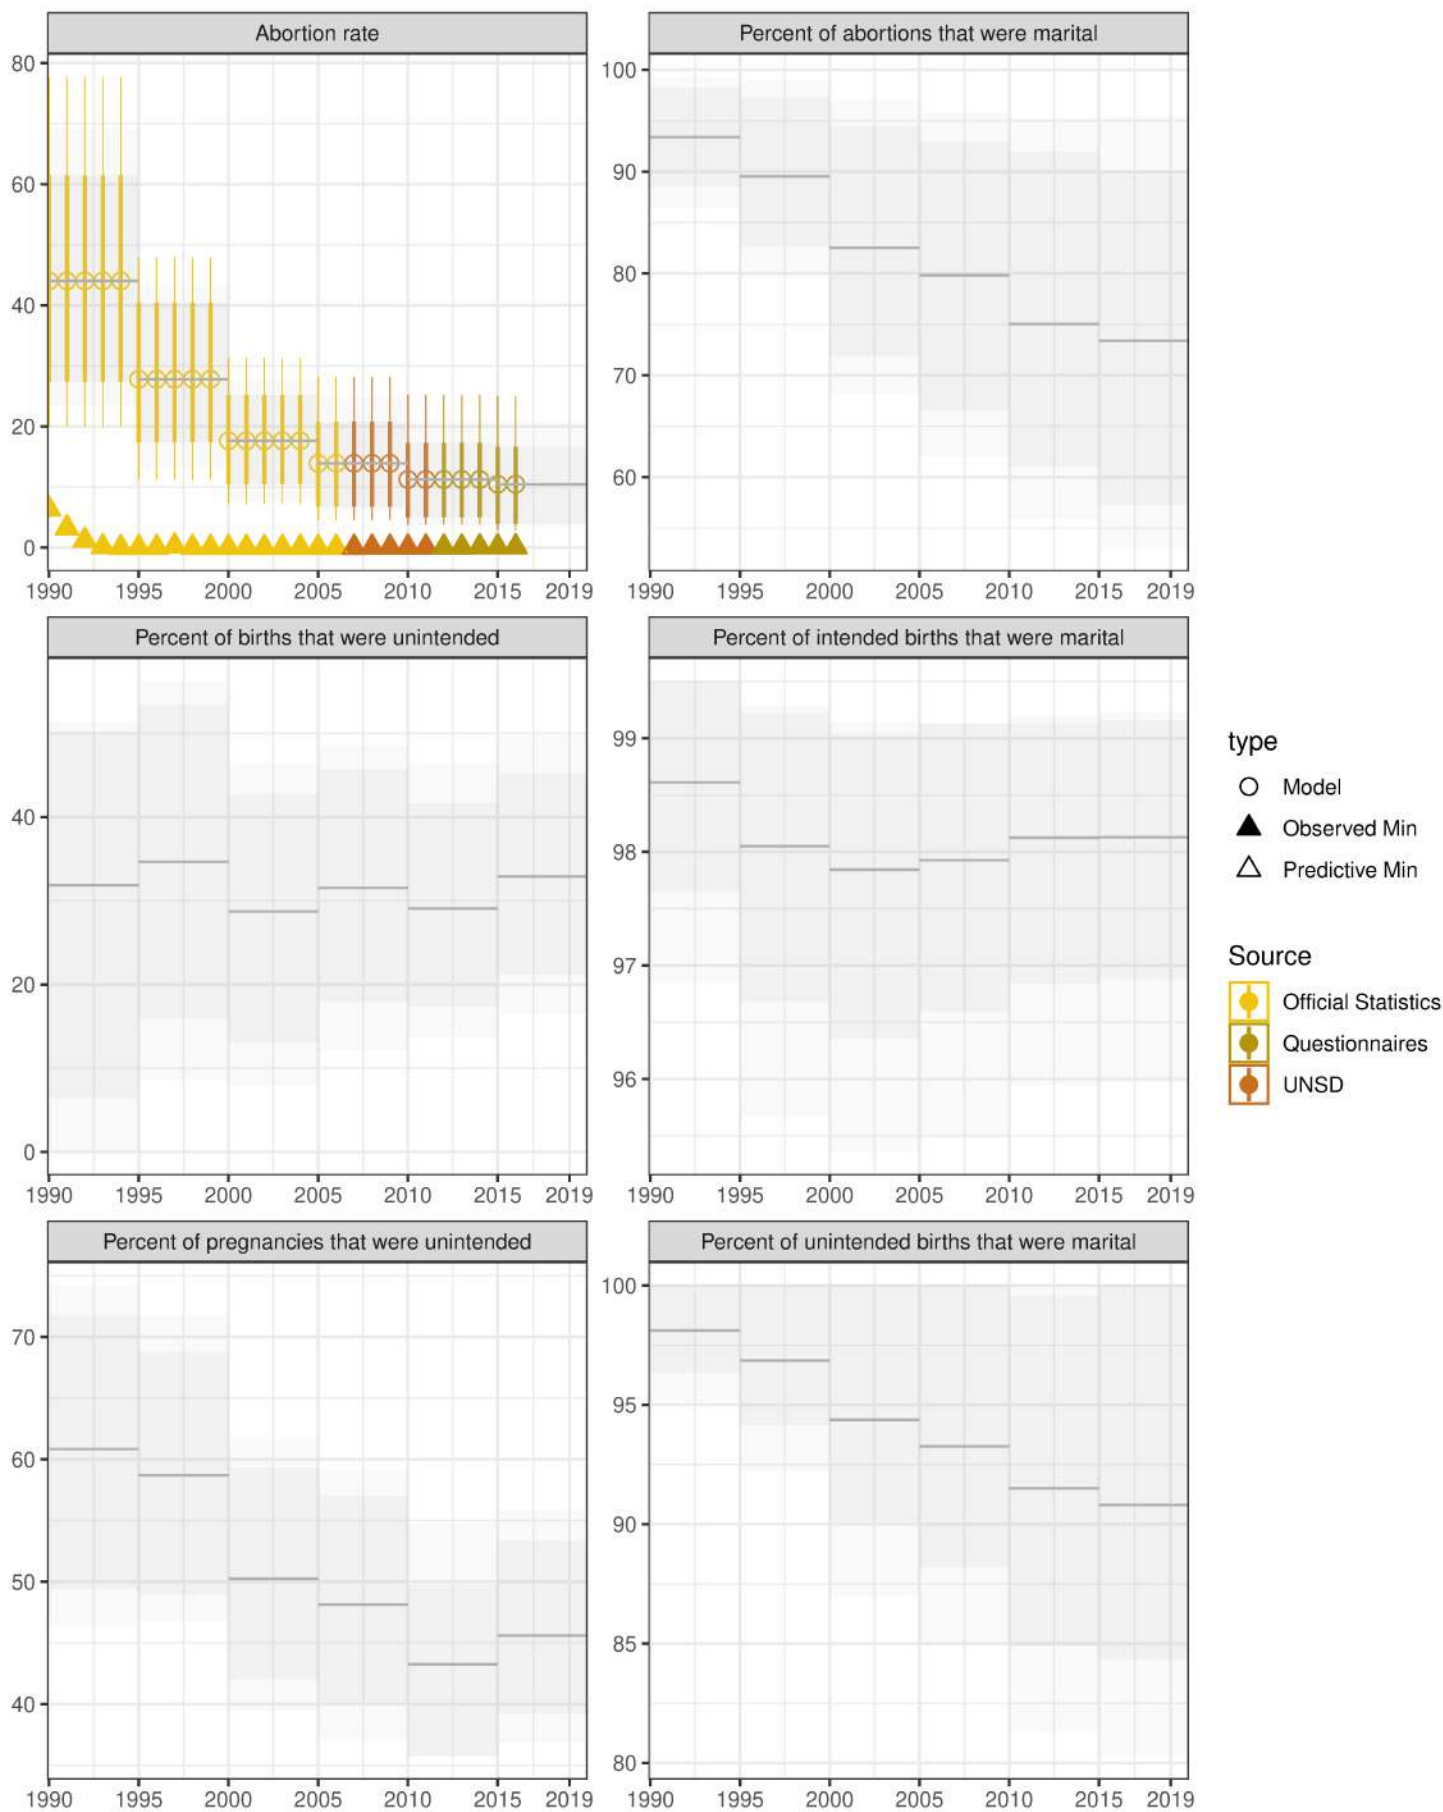

Note: Vertical lines and grey shading show 80% and 95% uncertainty intervals.



### Romania

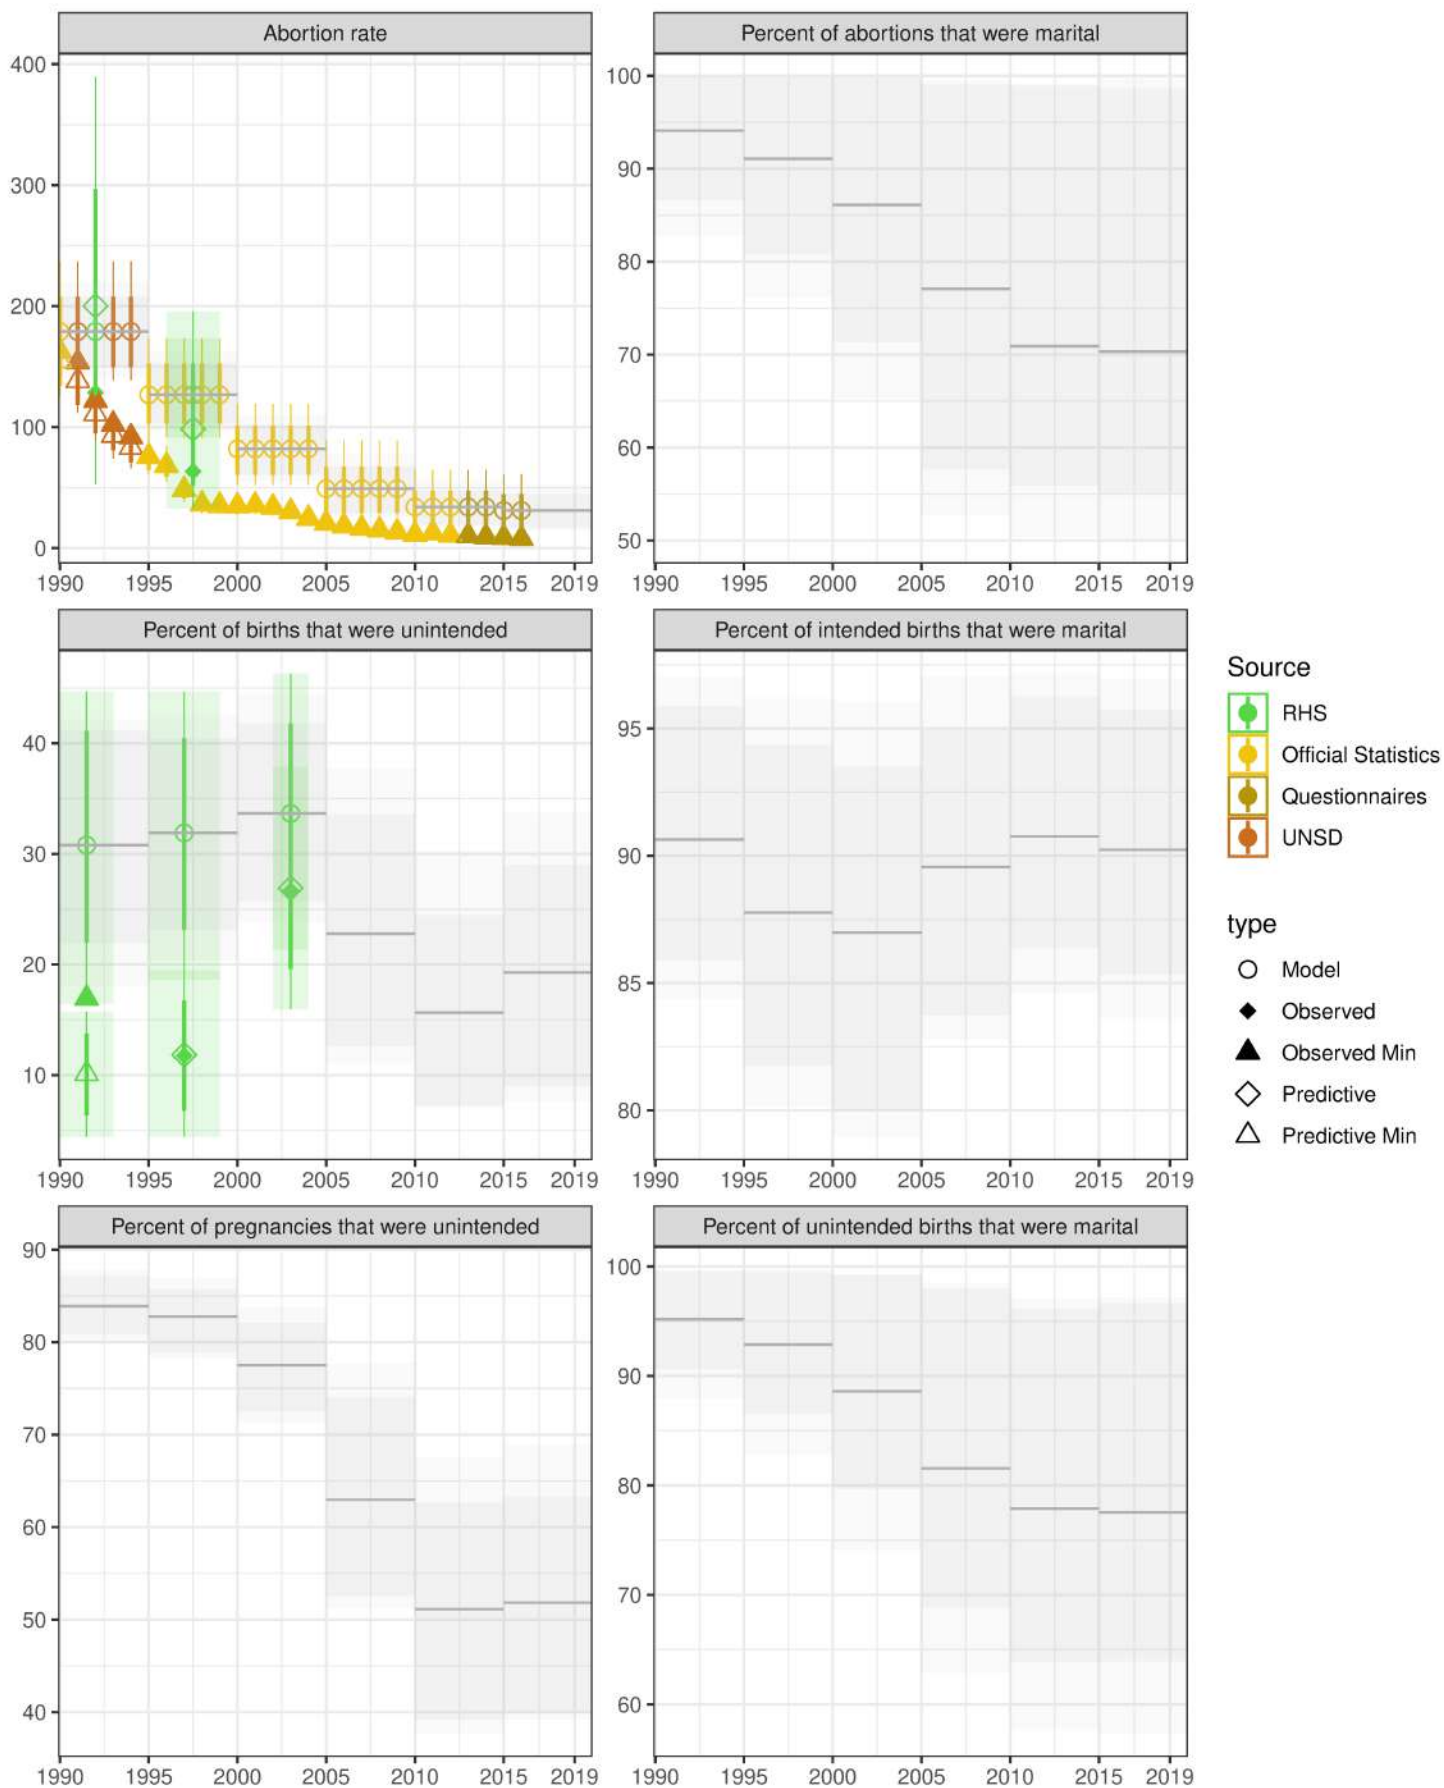

Note: Vertical lines and grey shading show 80% and 95% uncertainty intervals. Color shading shows when data were collected, if more than one year.

Russia

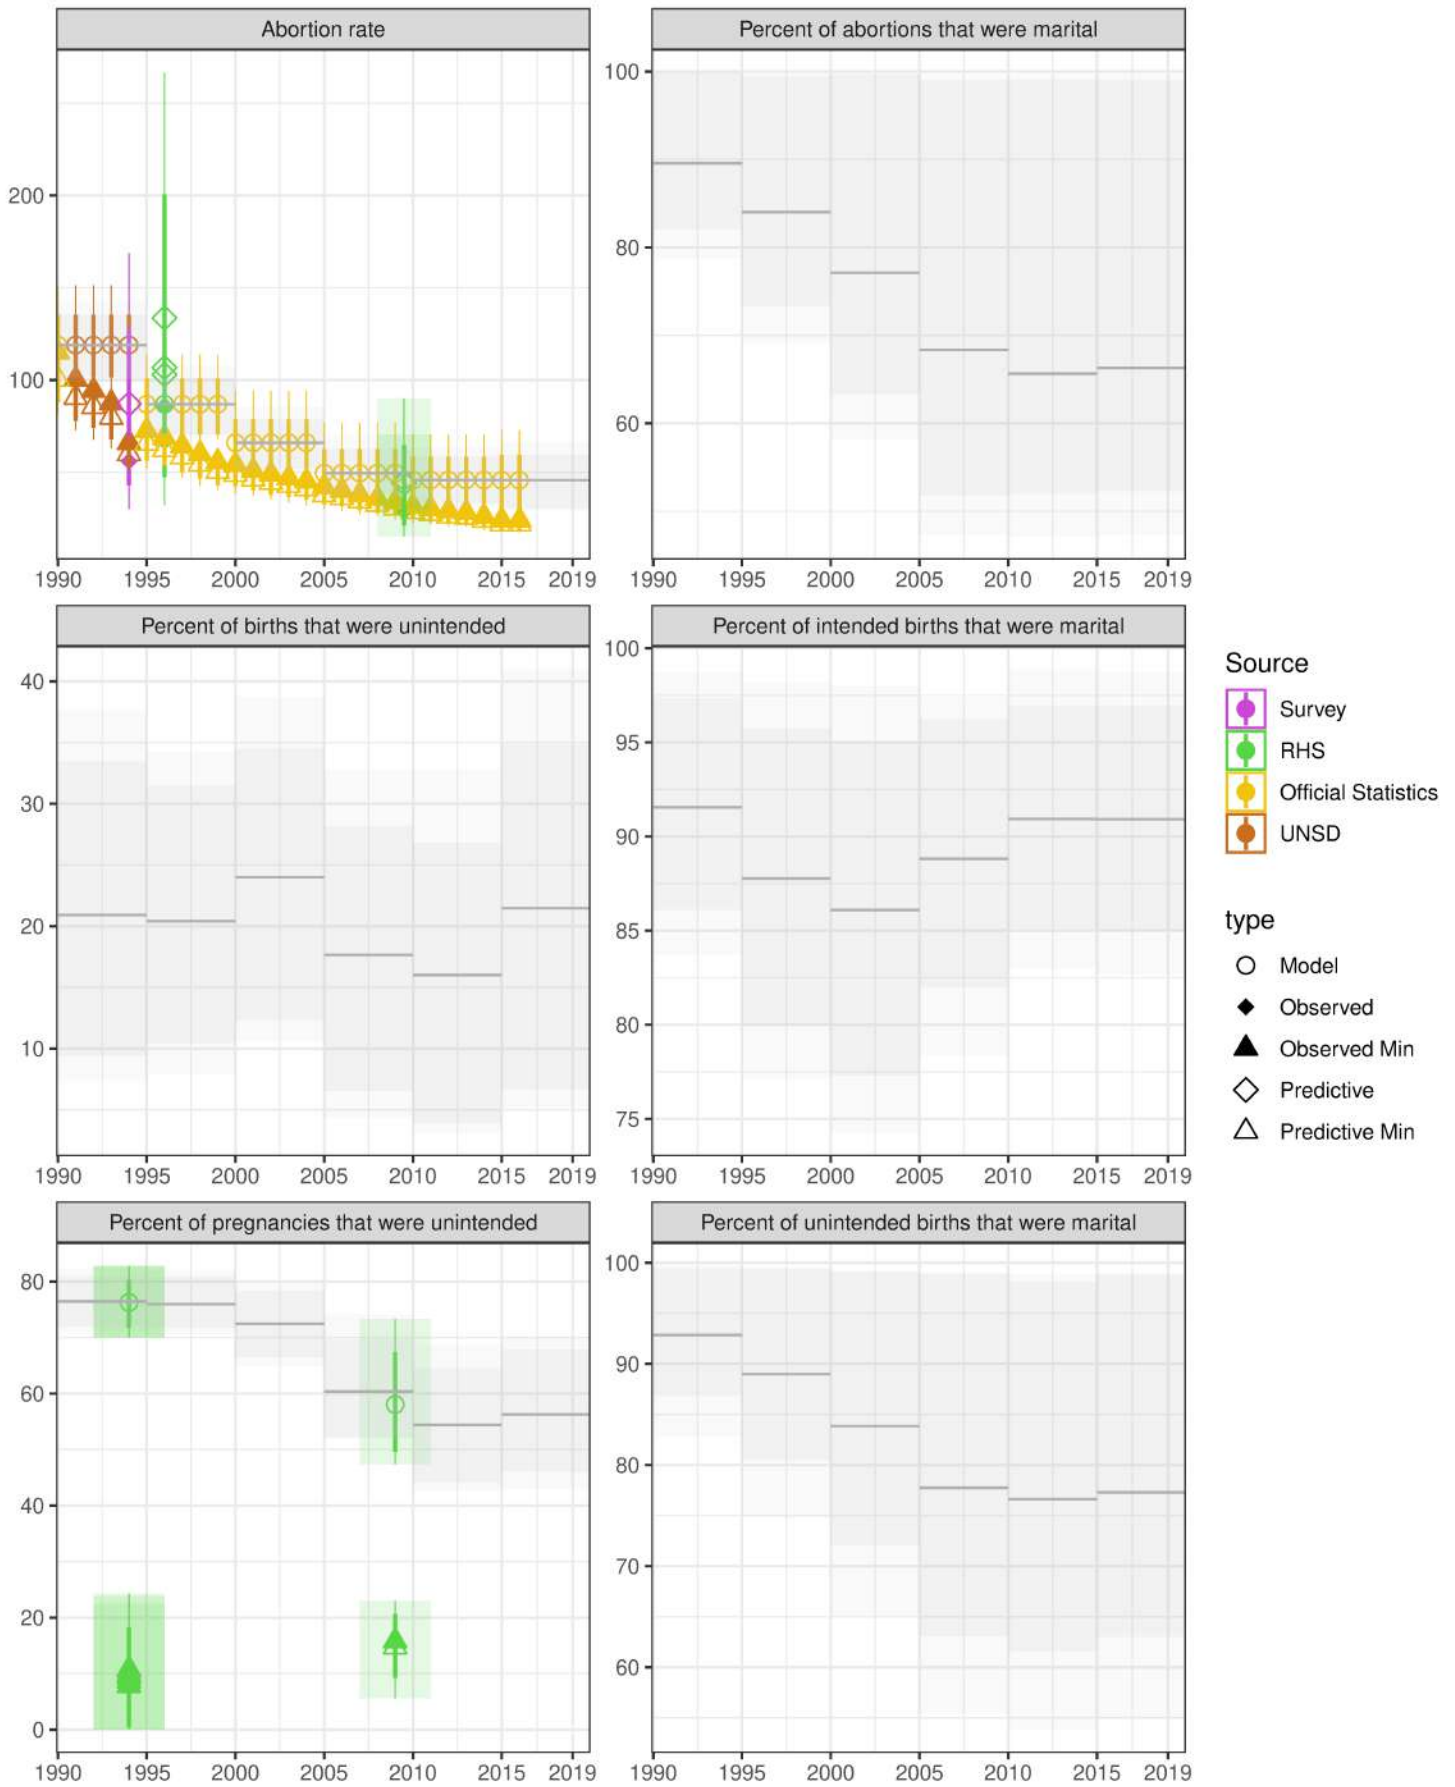

Note: Vertical lines and grey shading show 80% and 95% uncertainty intervals. Color shading shows when data were collected, if more than one year.

### Slovakia

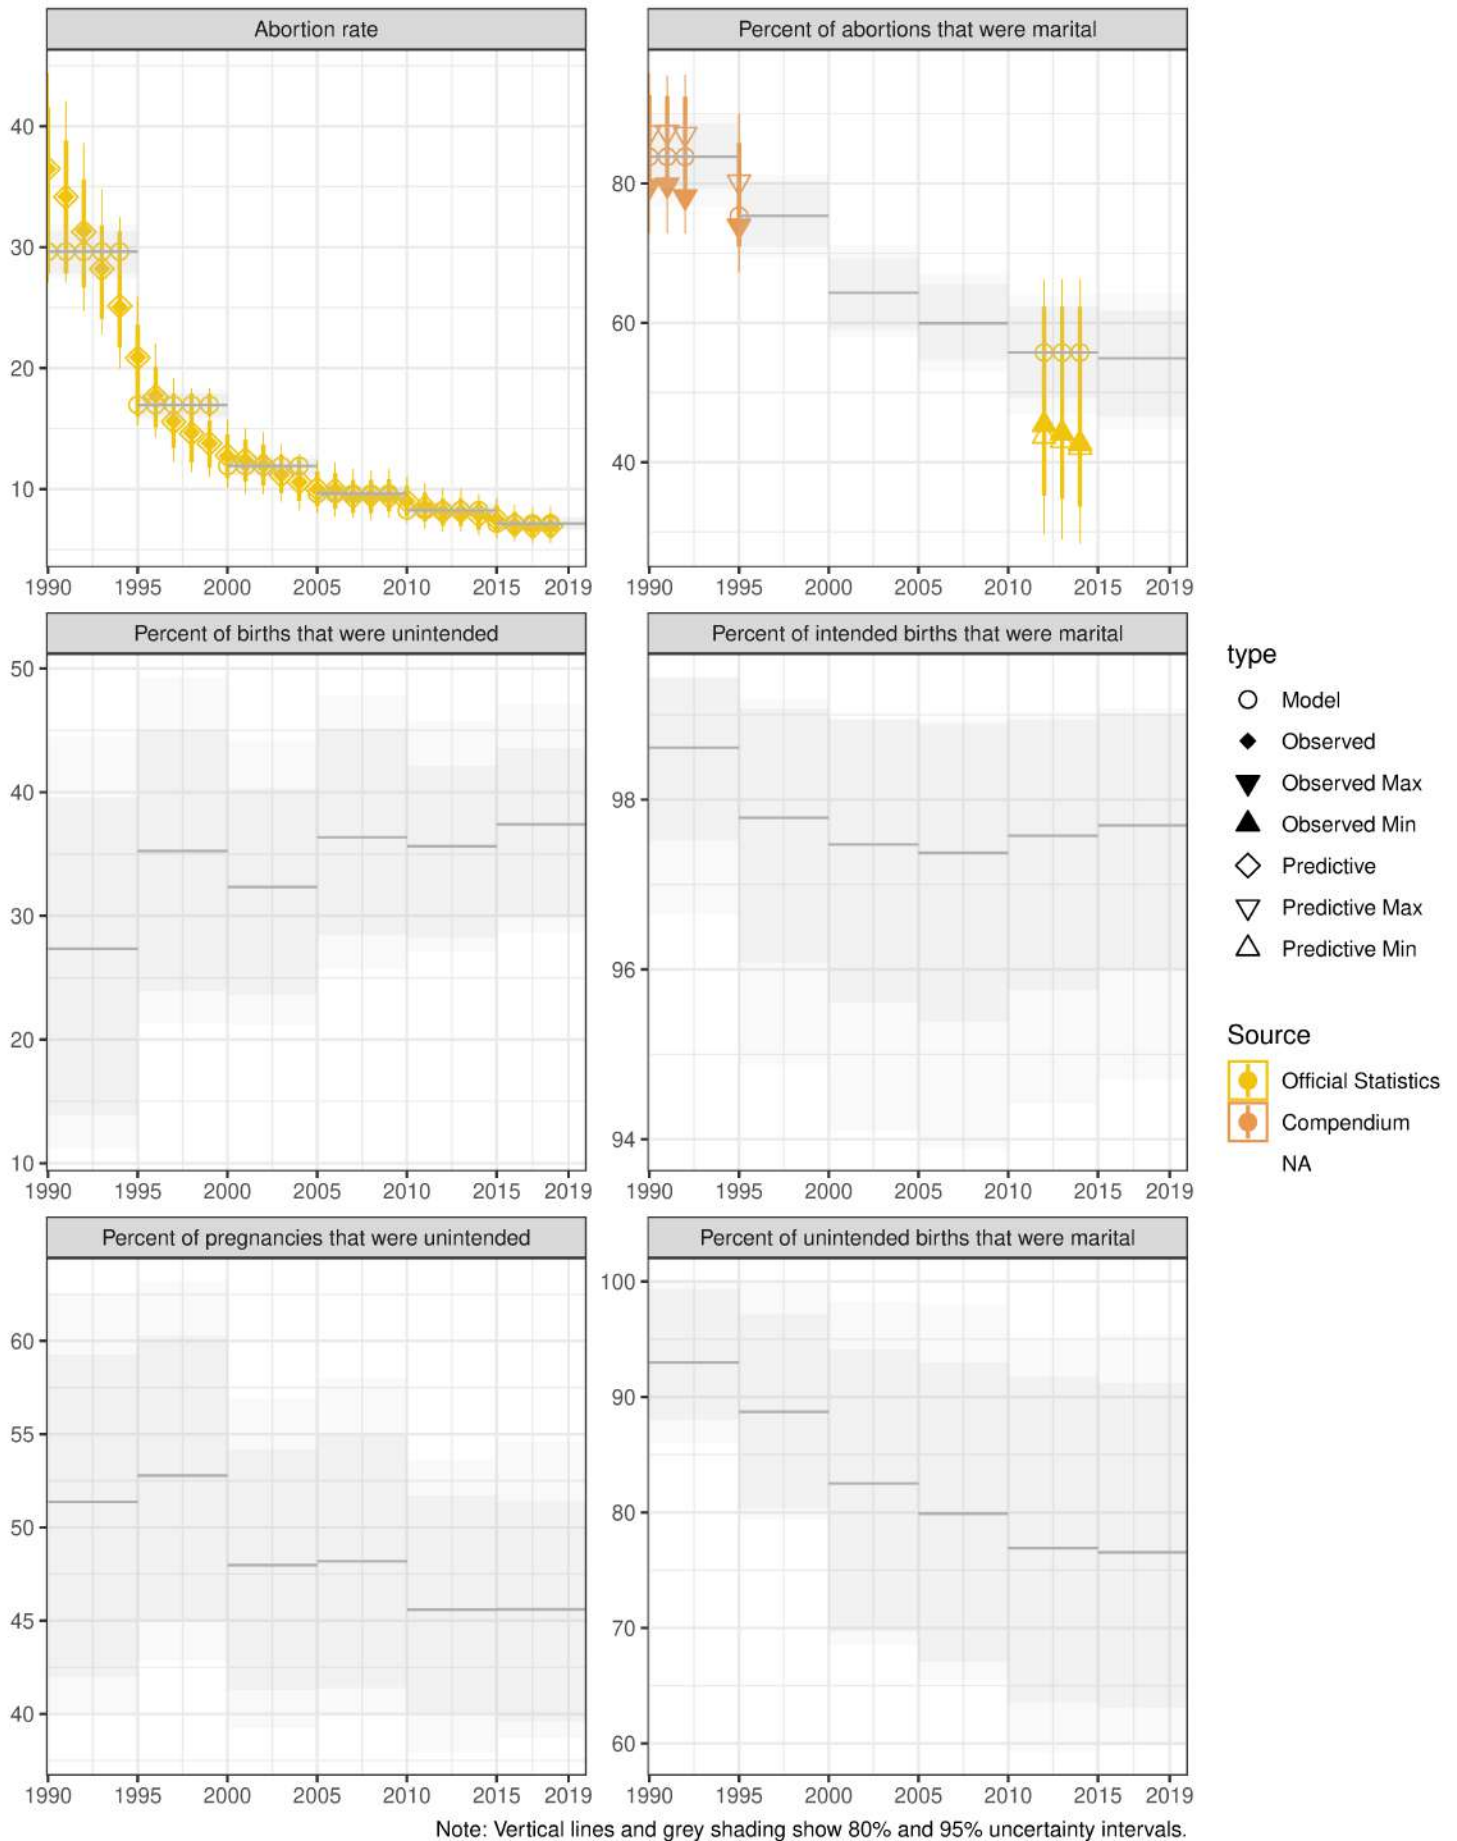

### Ukraine

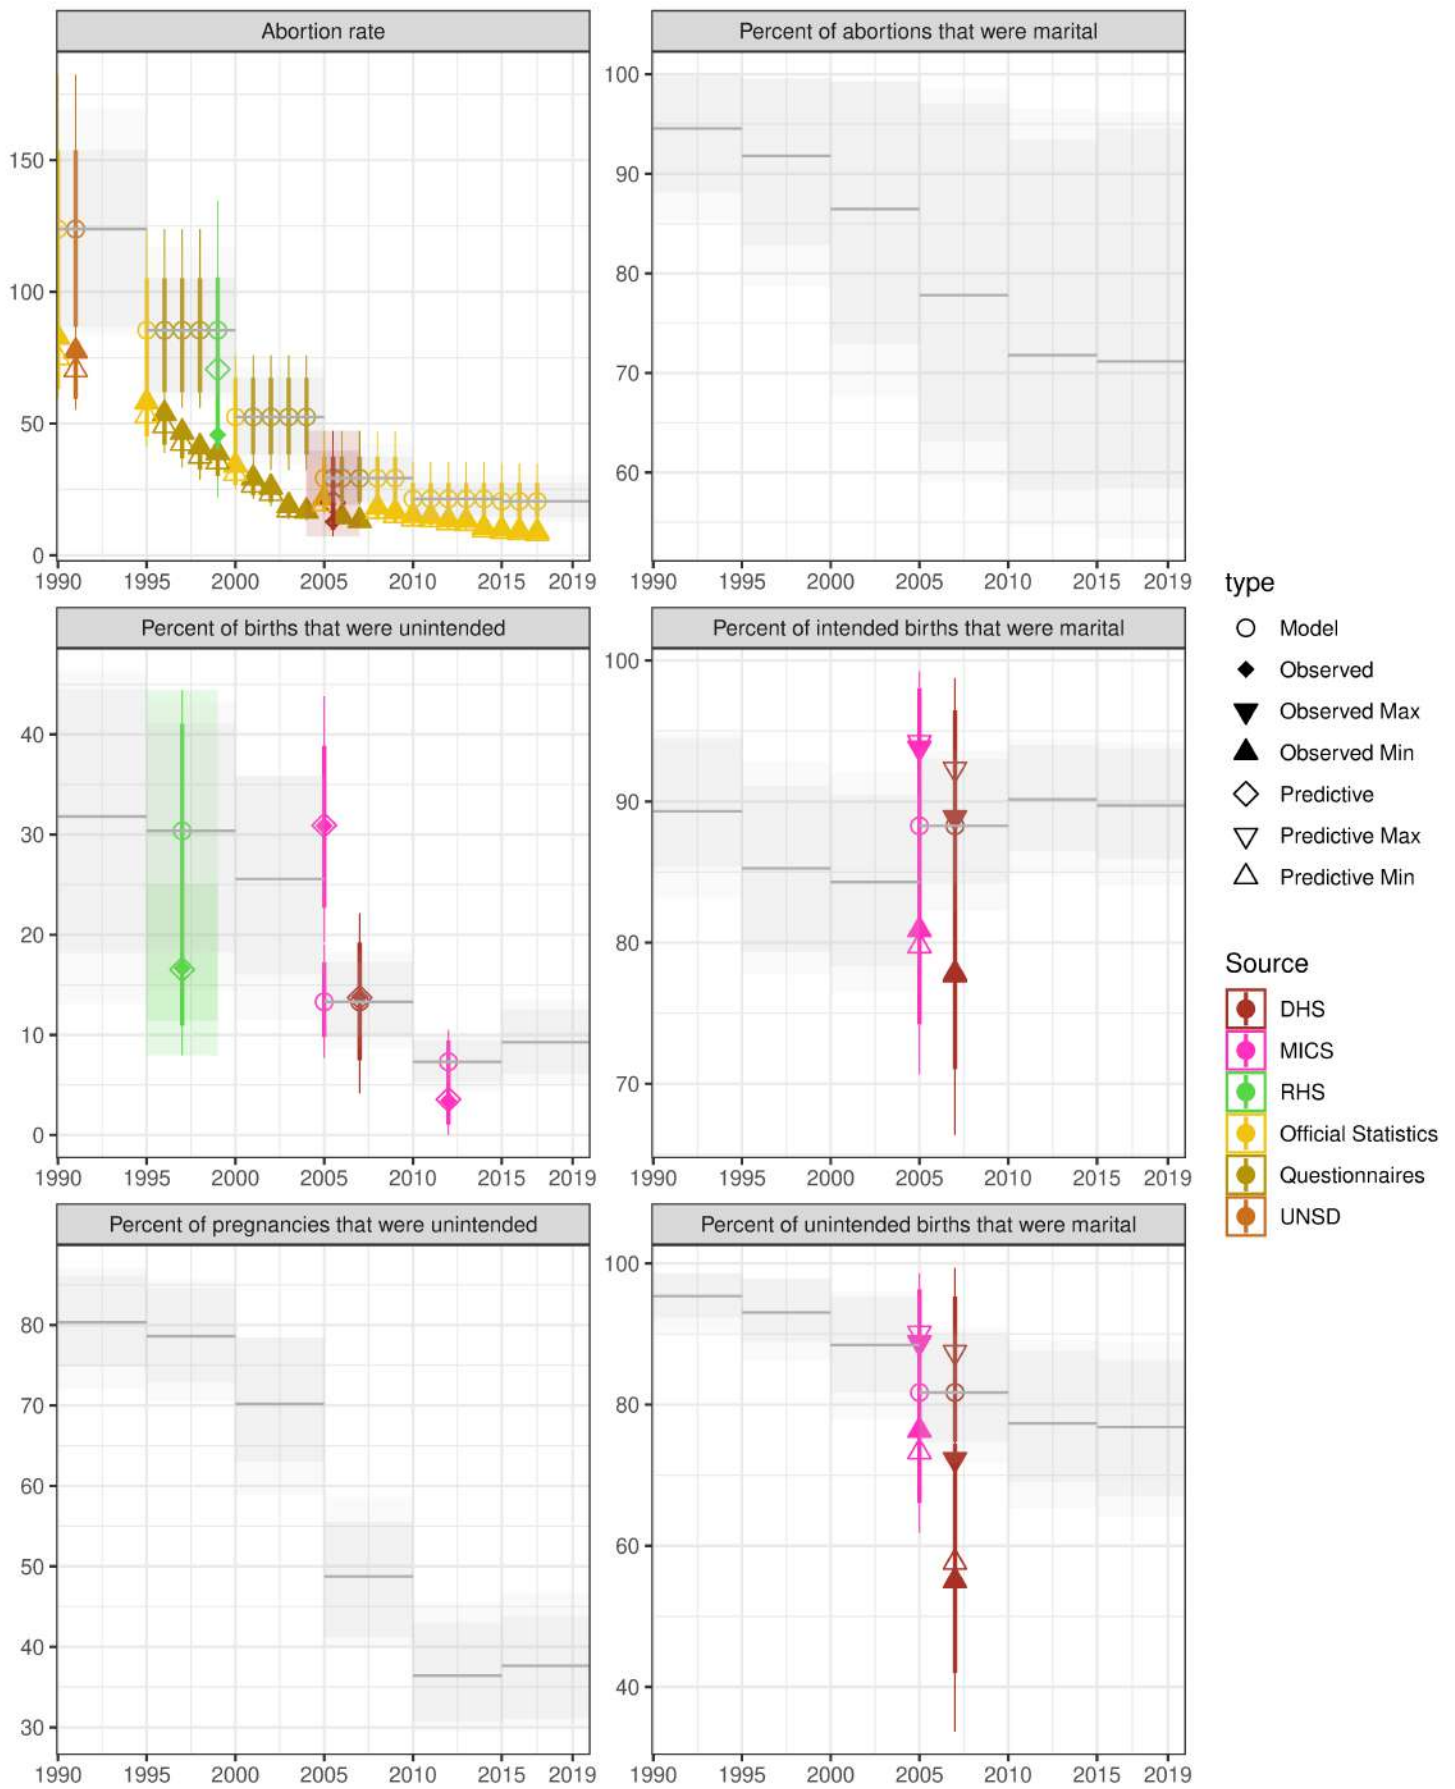

Note: Vertical lines and grey shading show 80% and 95% uncertainty intervals. Color shading shows when data were collected, if more than one year.

## 7.2 Northern Europe

### Denmark

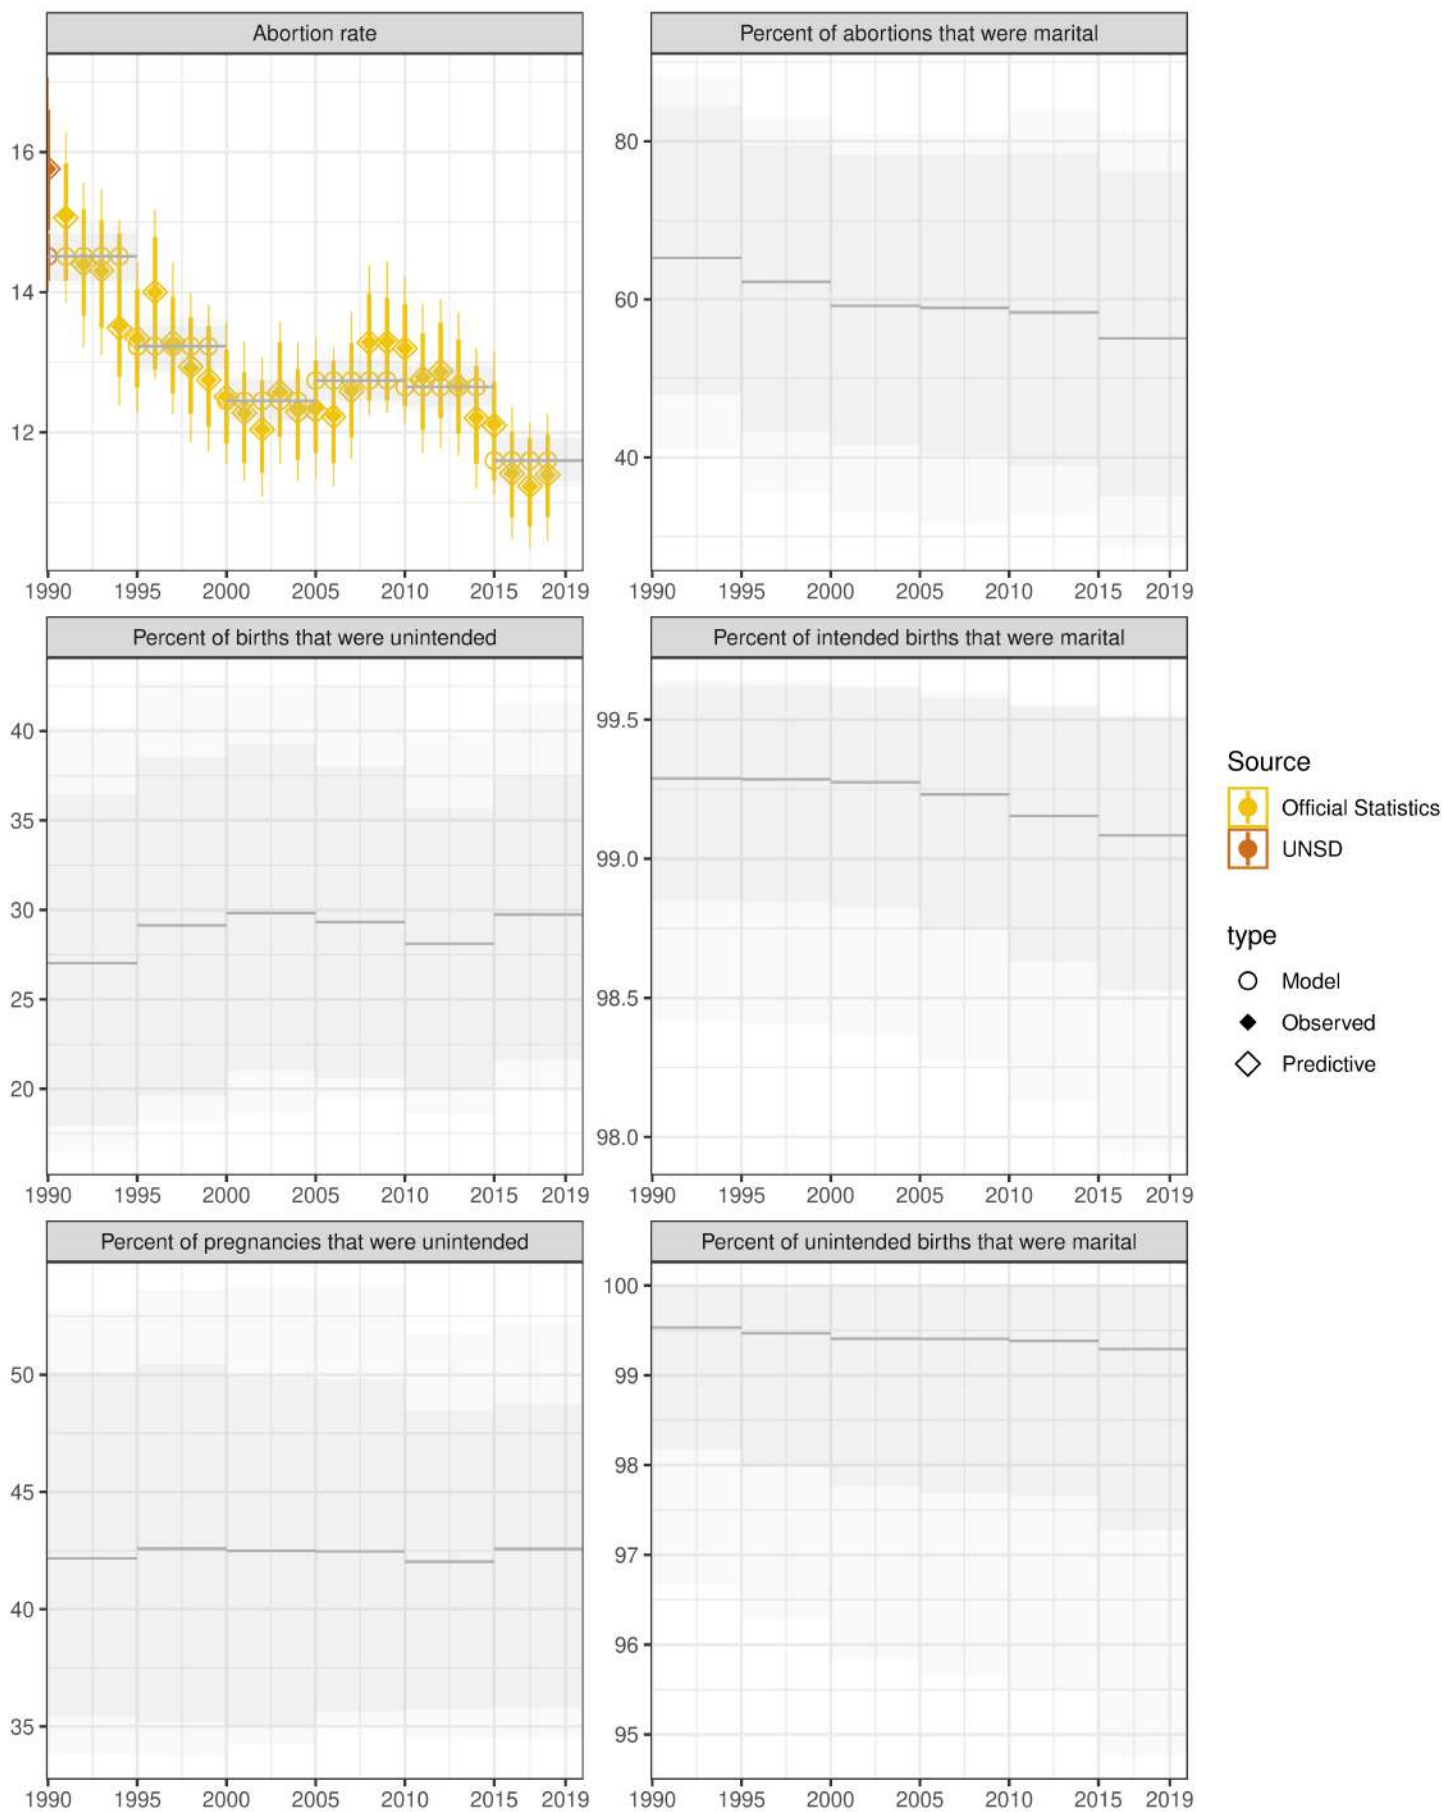

Note: Vertical lines and grey shading show 80% and 95% uncertainty intervals.

Estonia

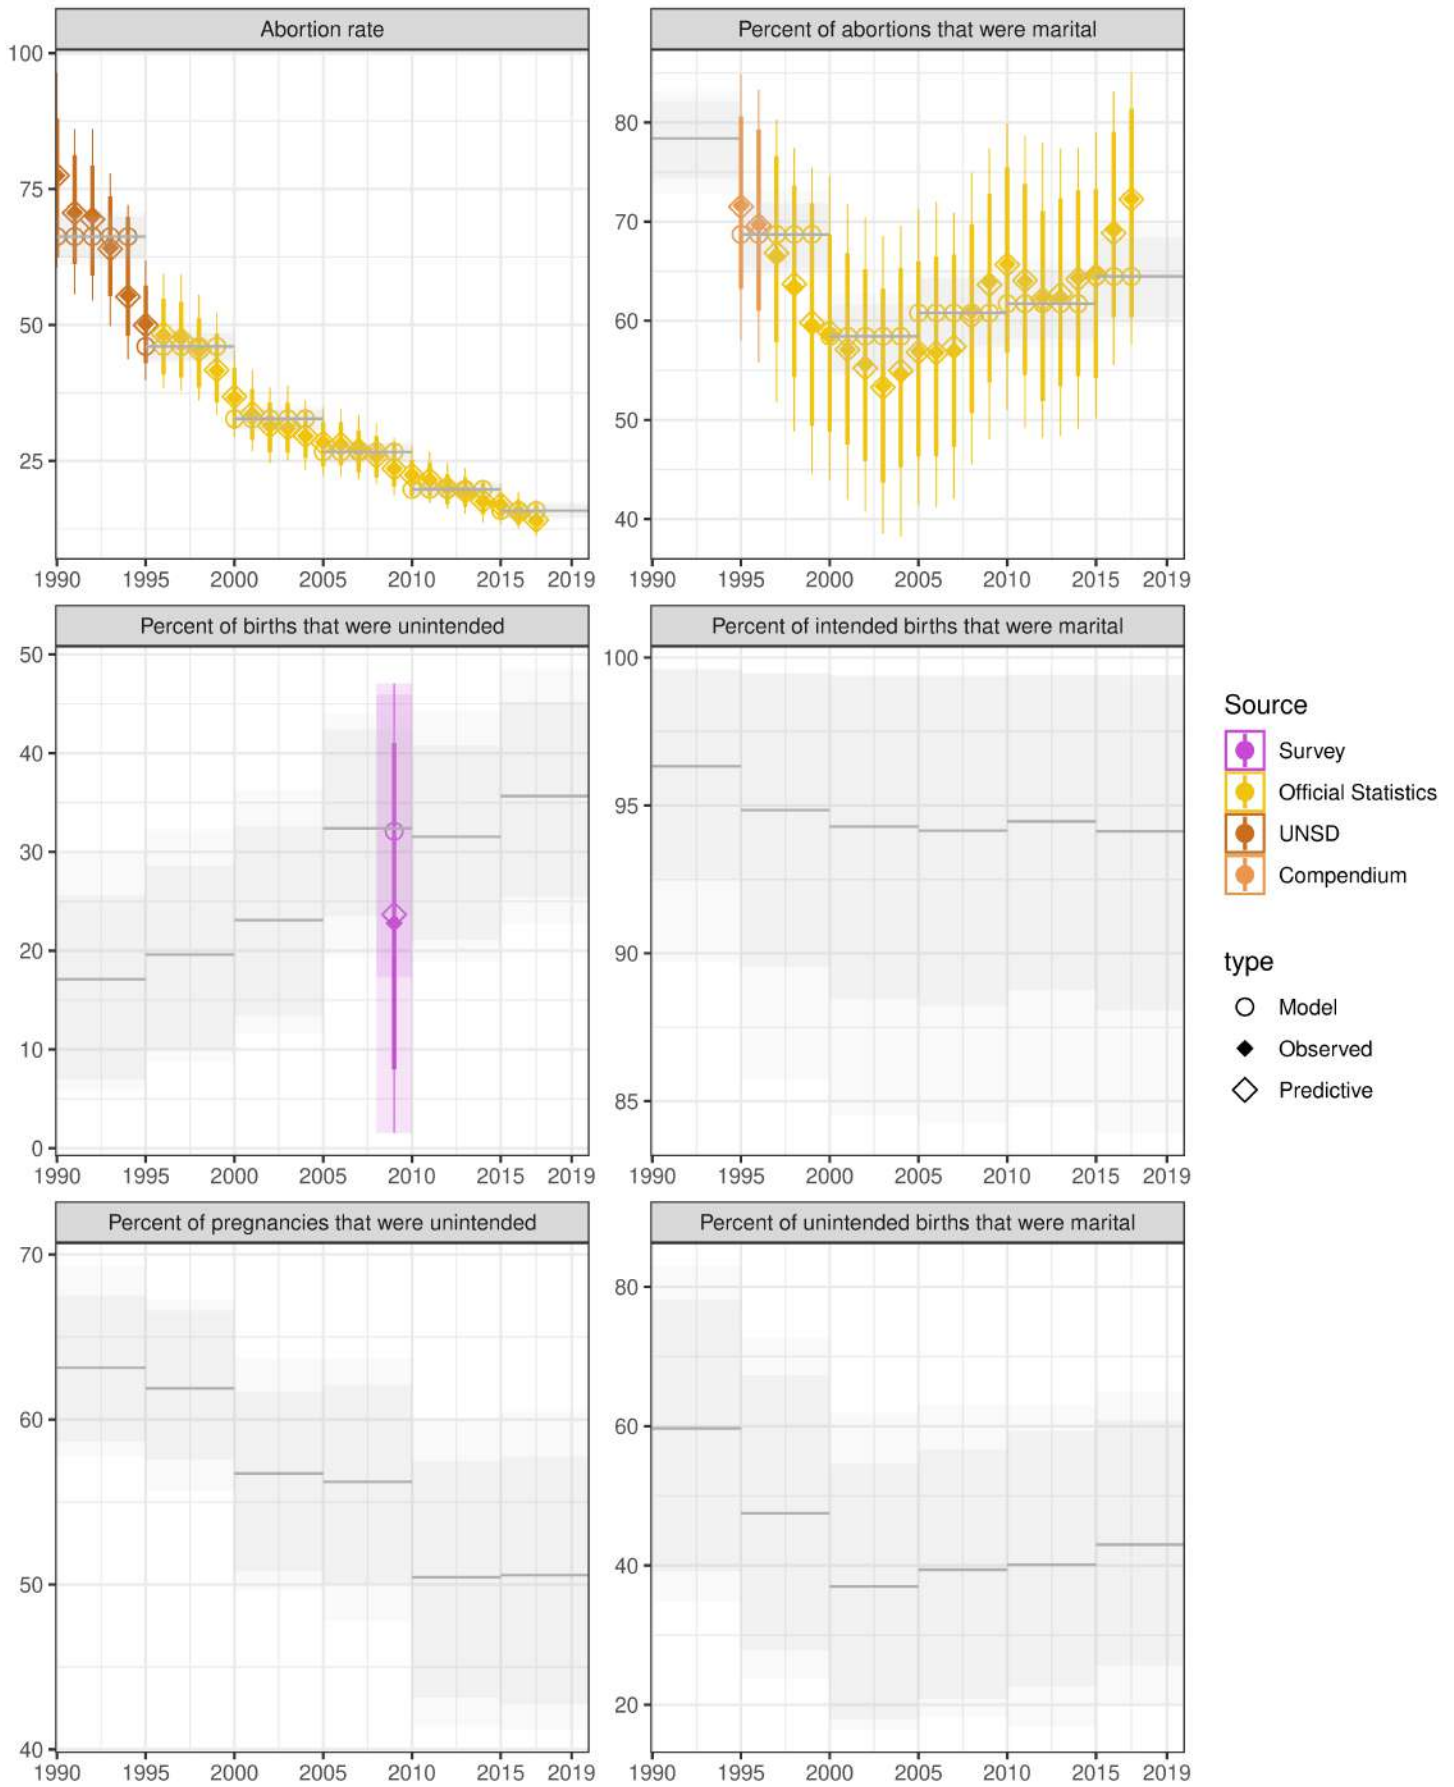

Finland

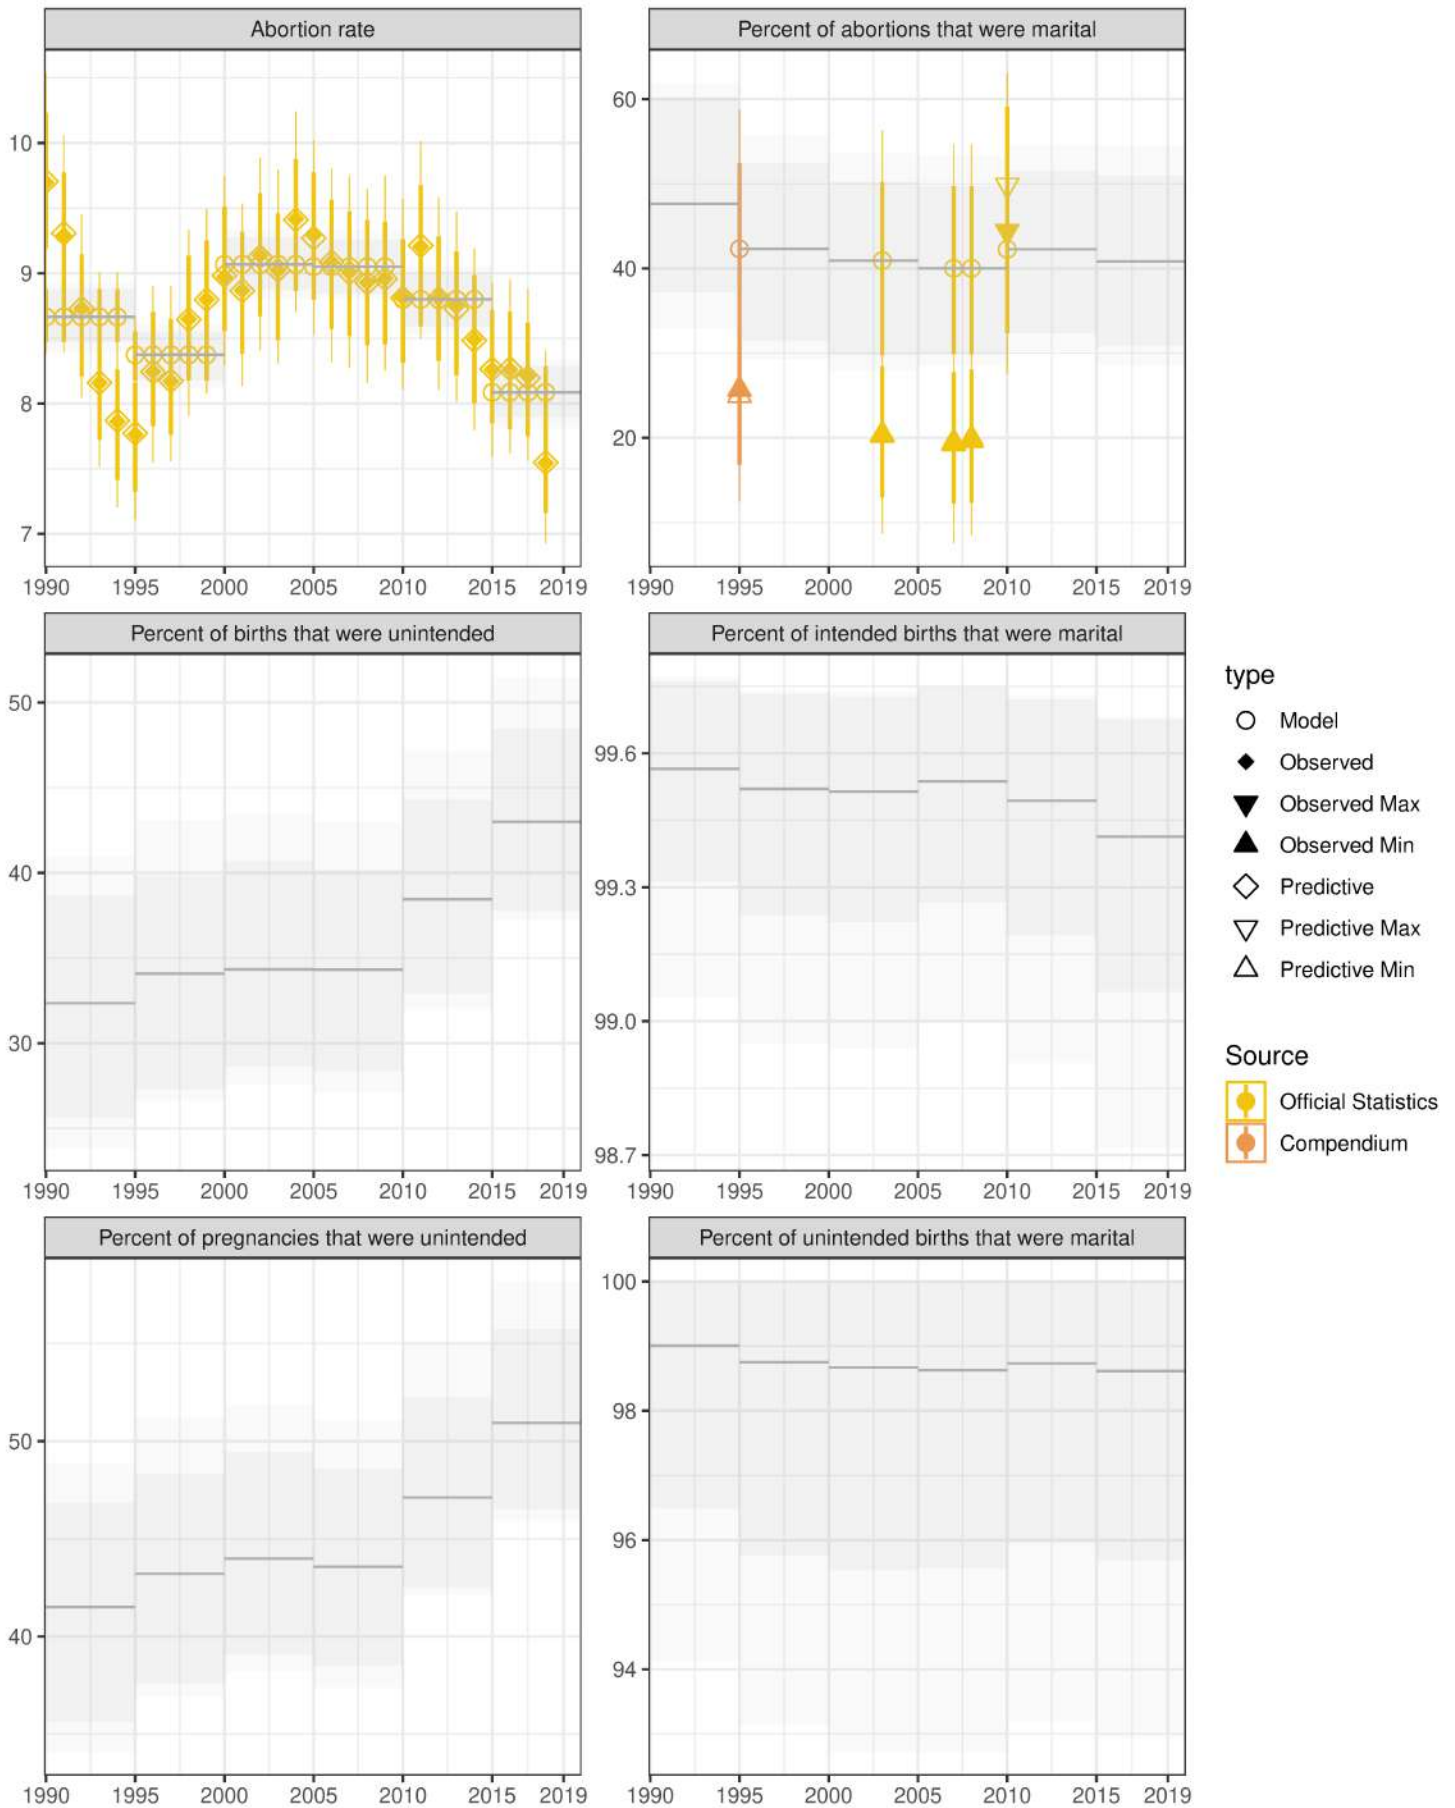

Note: Vertical lines and grey shading show 80% and 95% uncertainty intervals.



Iceland

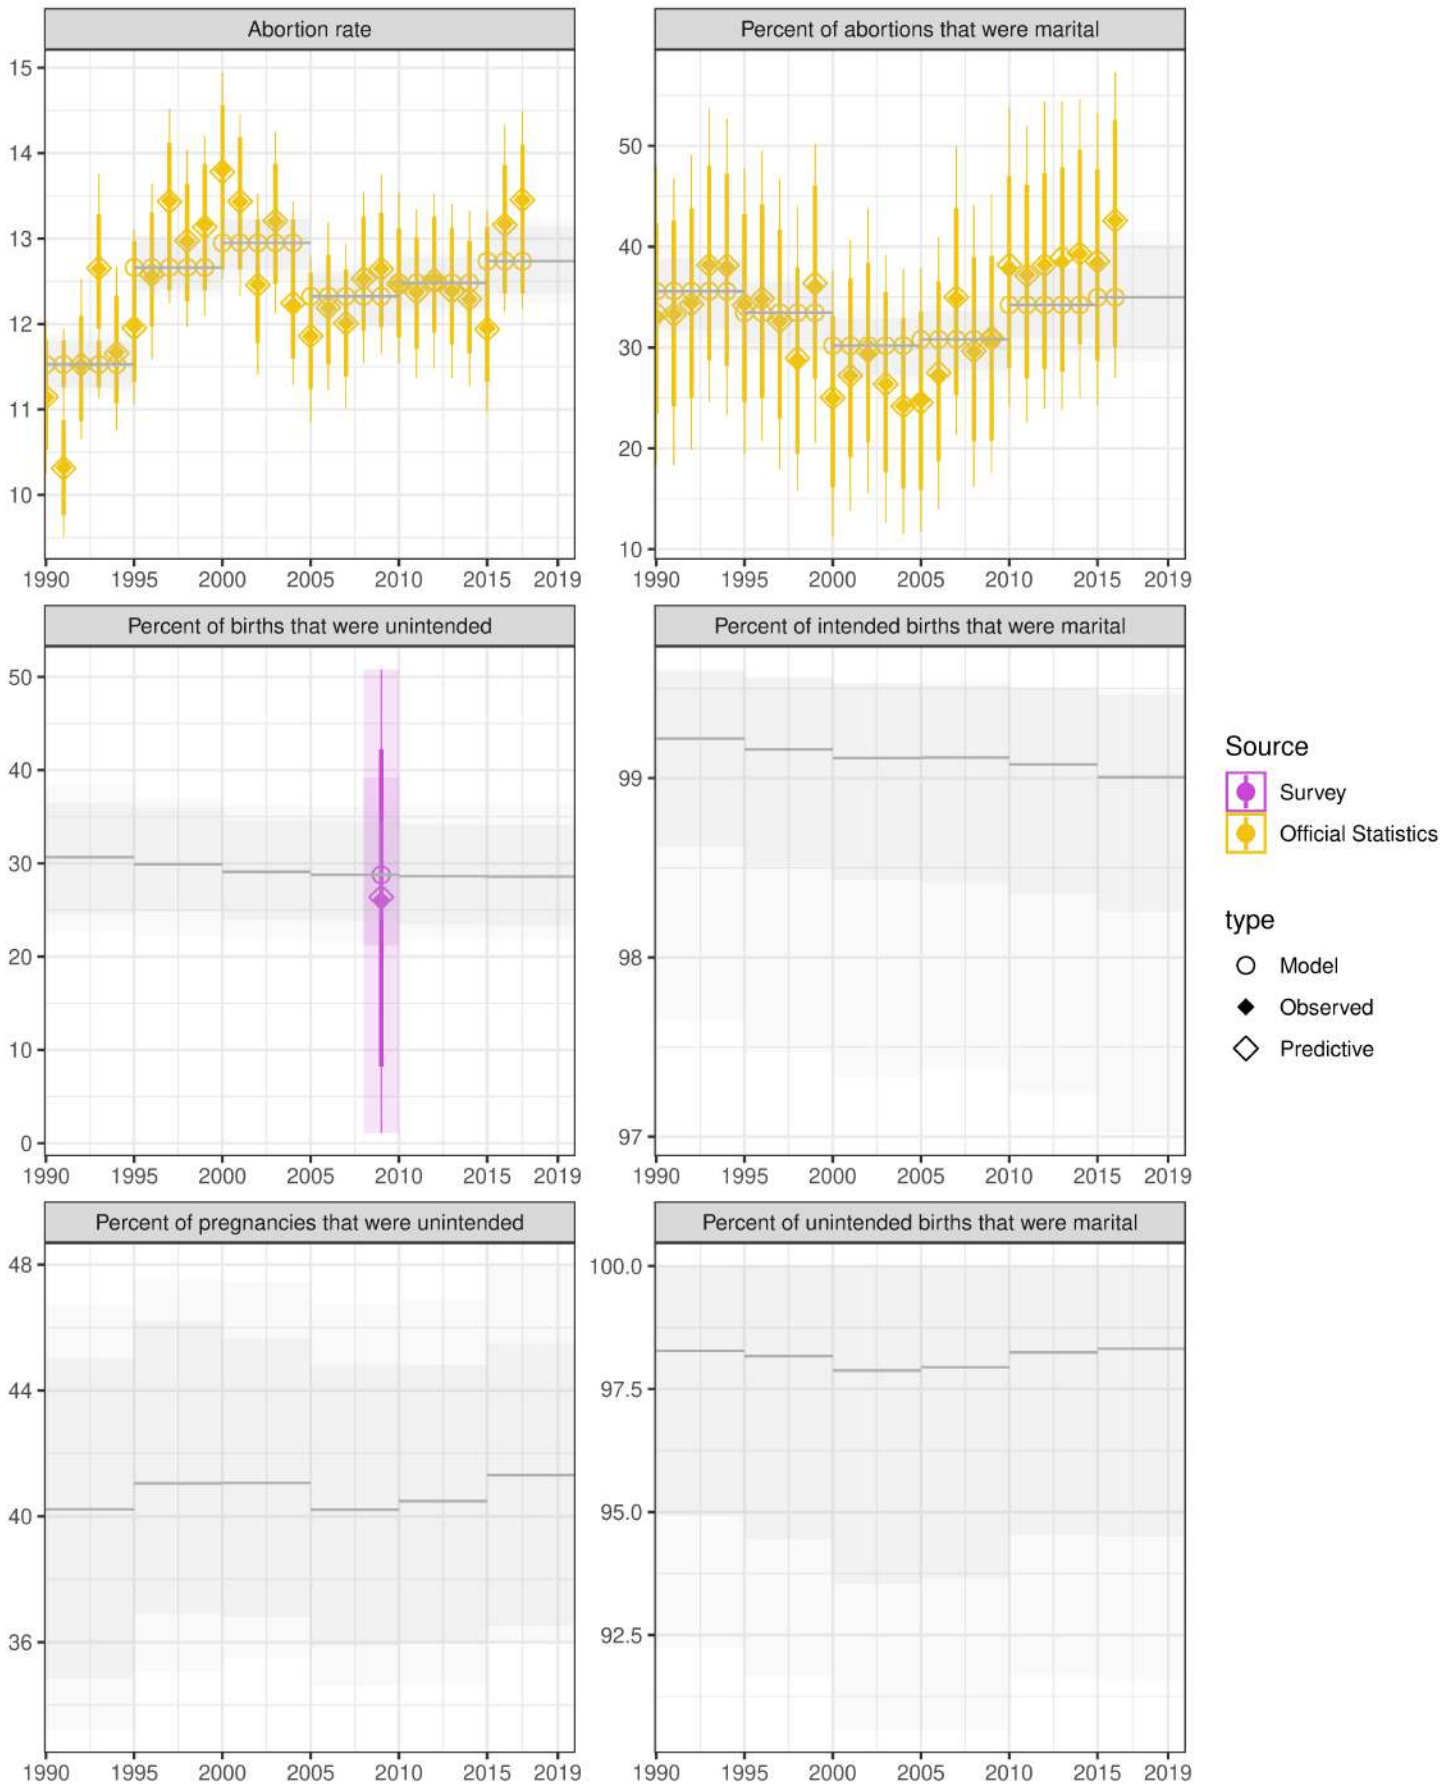

Note: Vertical lines and grey shading show 80% and 95% uncertainty intervals. Color shading shows when data were collected, if more than one year.

### Latvia

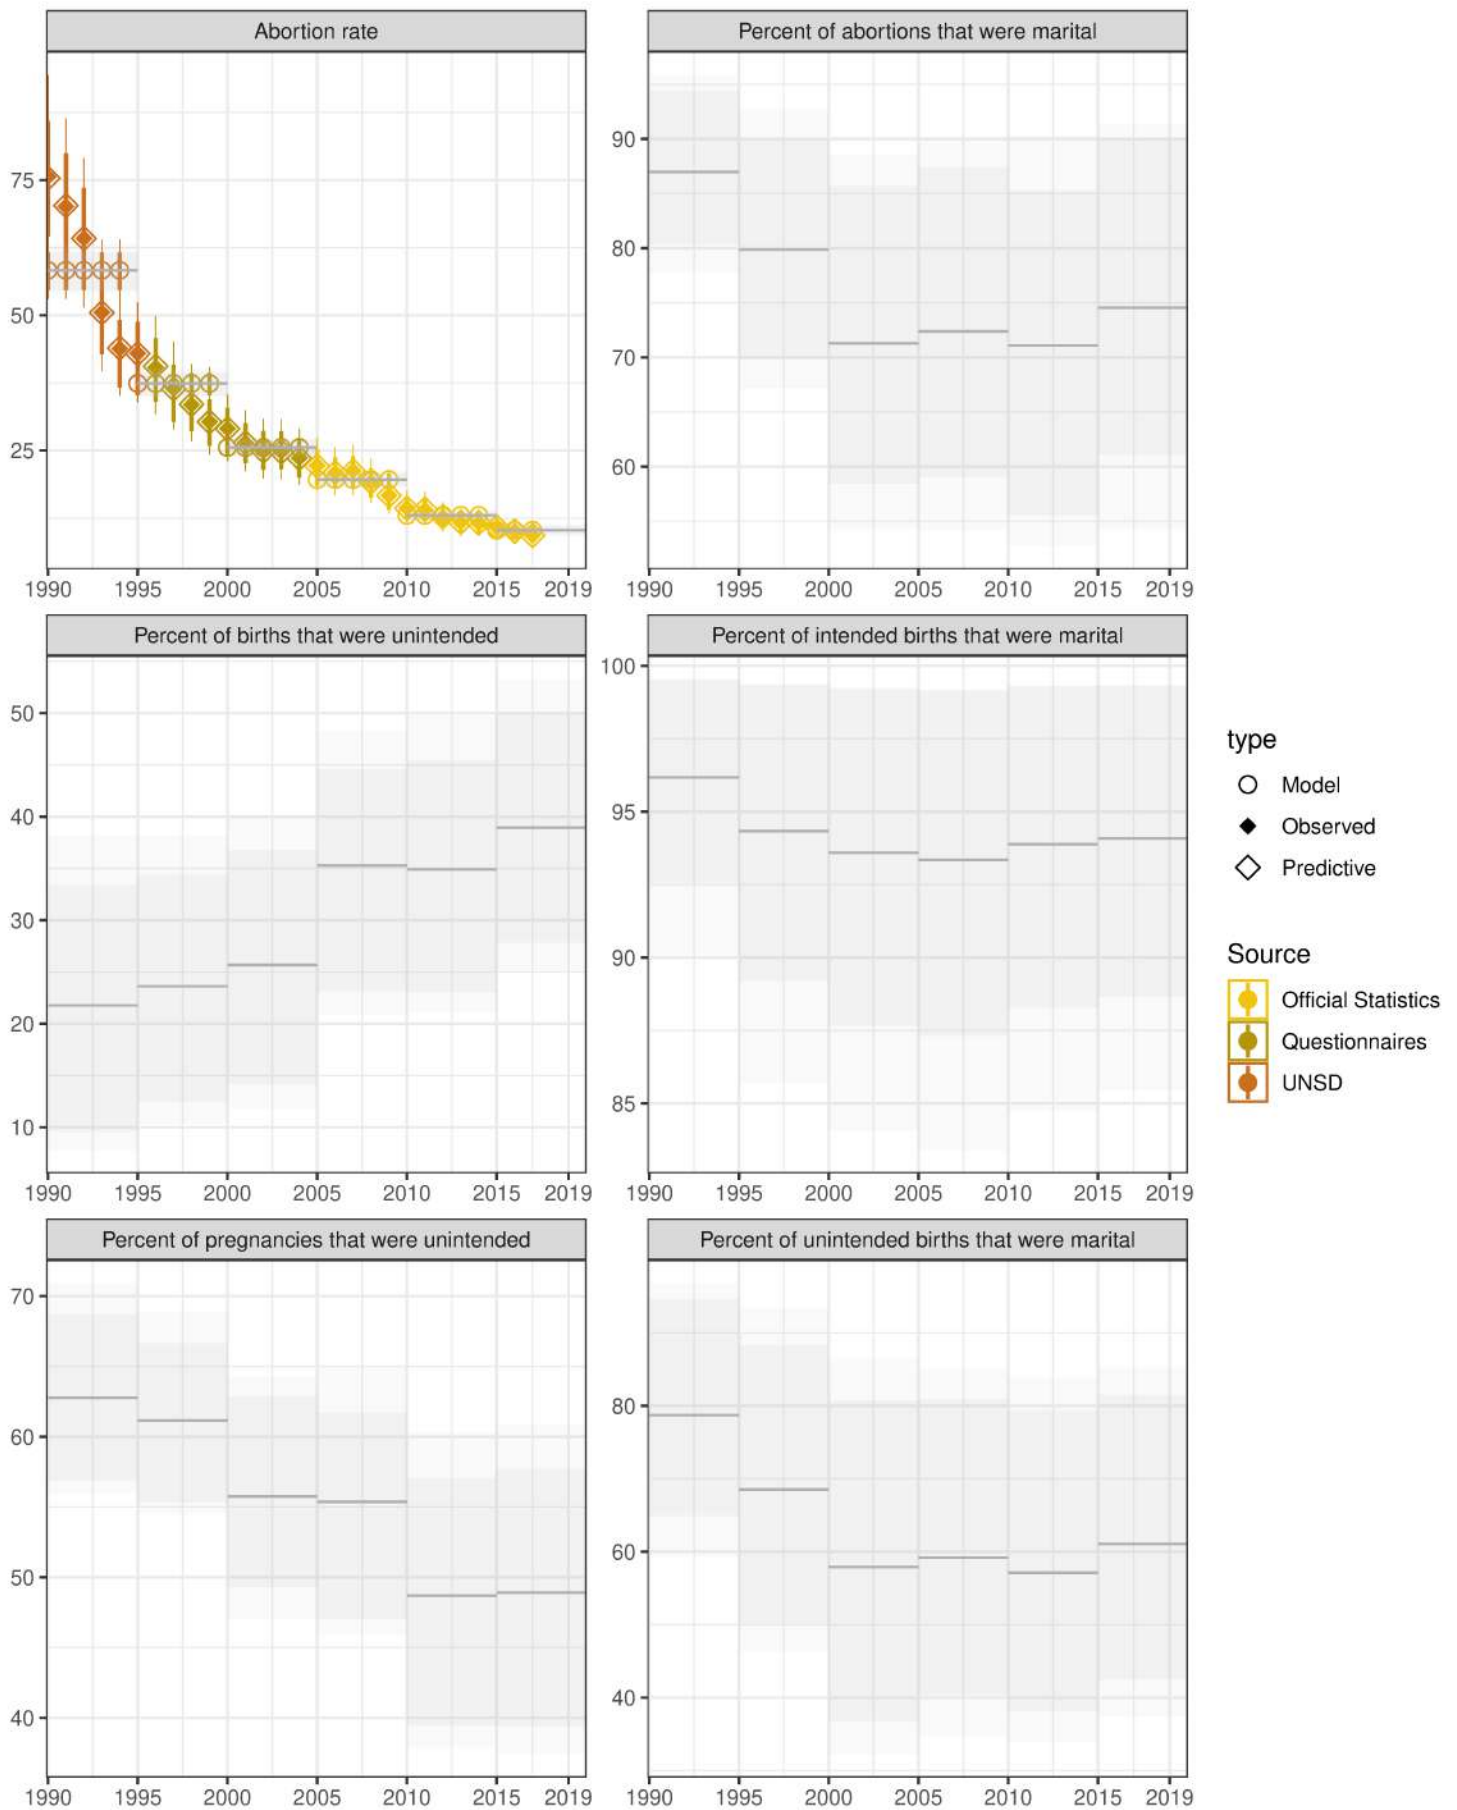

### Lithuania

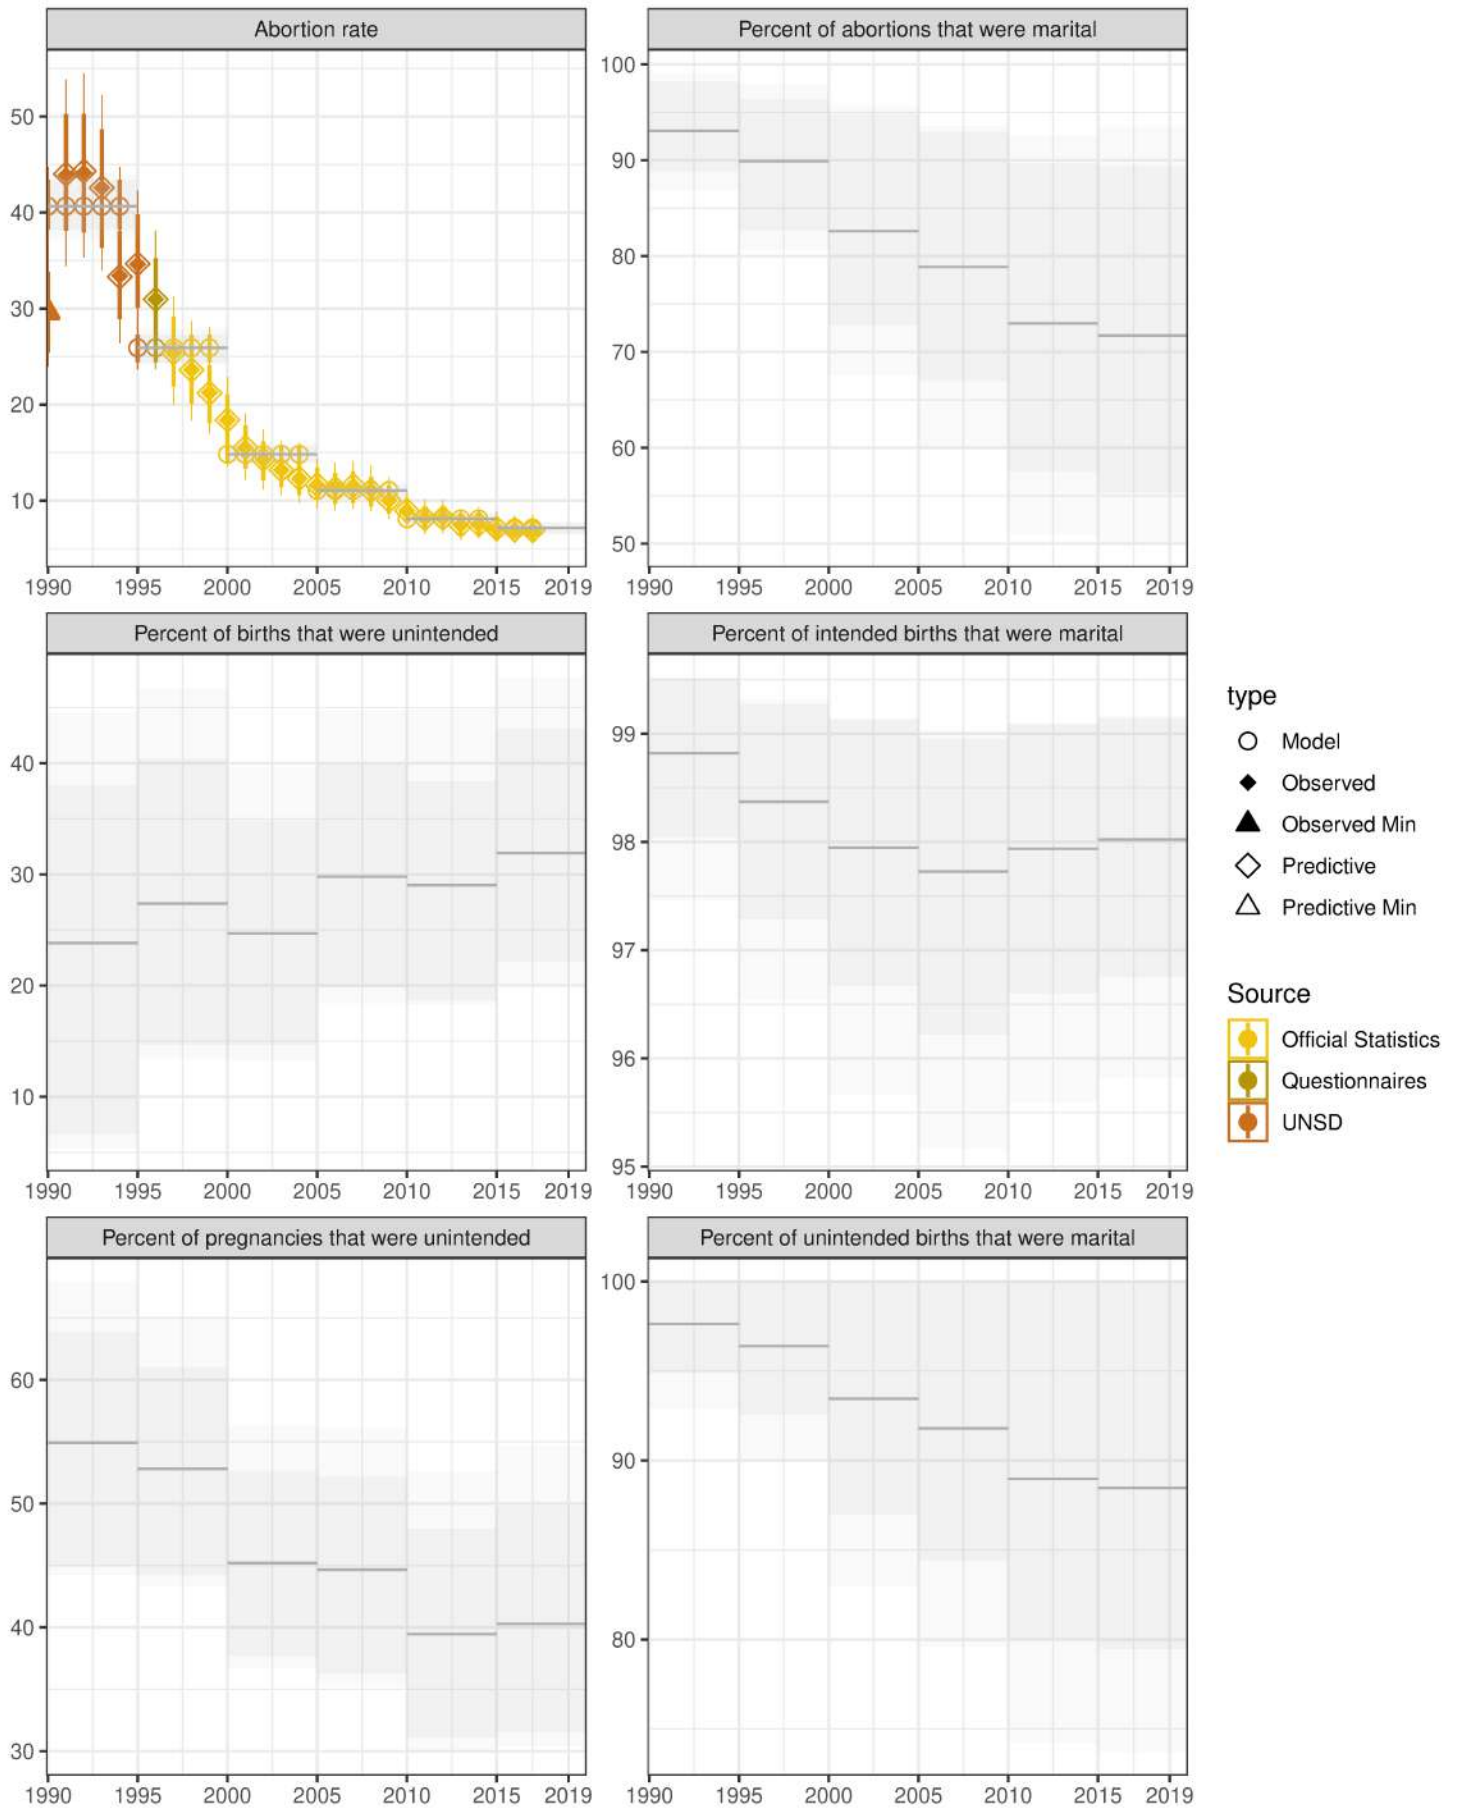

Note: Vertical lines and grey shading show 80% and 95% uncertainty intervals.

### Norway

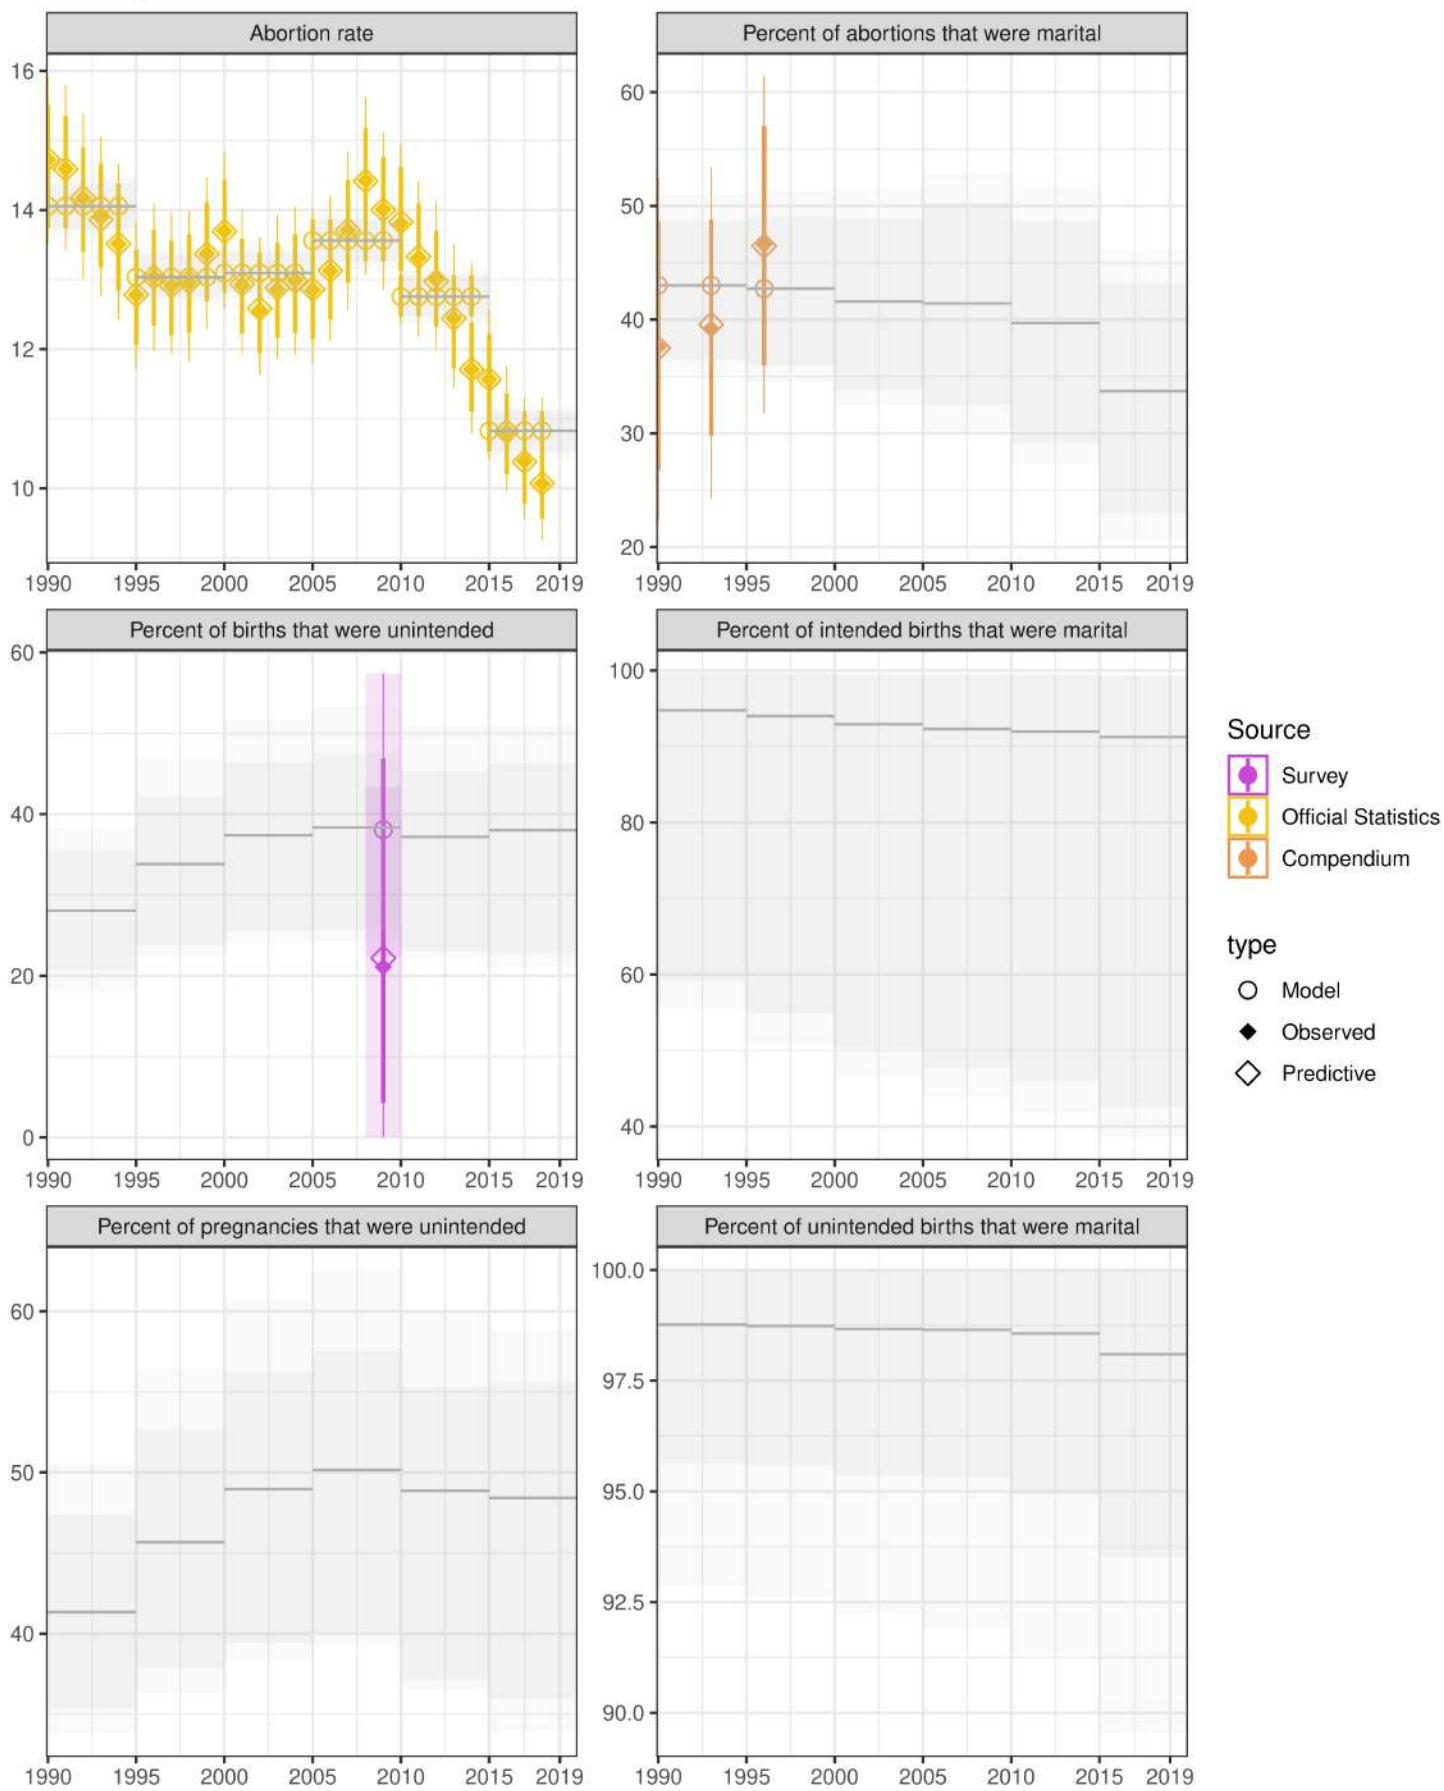

Note: Vertical lines and grey shading show 80% and 95% uncertainty intervals. Color shading shows when data were collected, if more than one year.

### Sweden

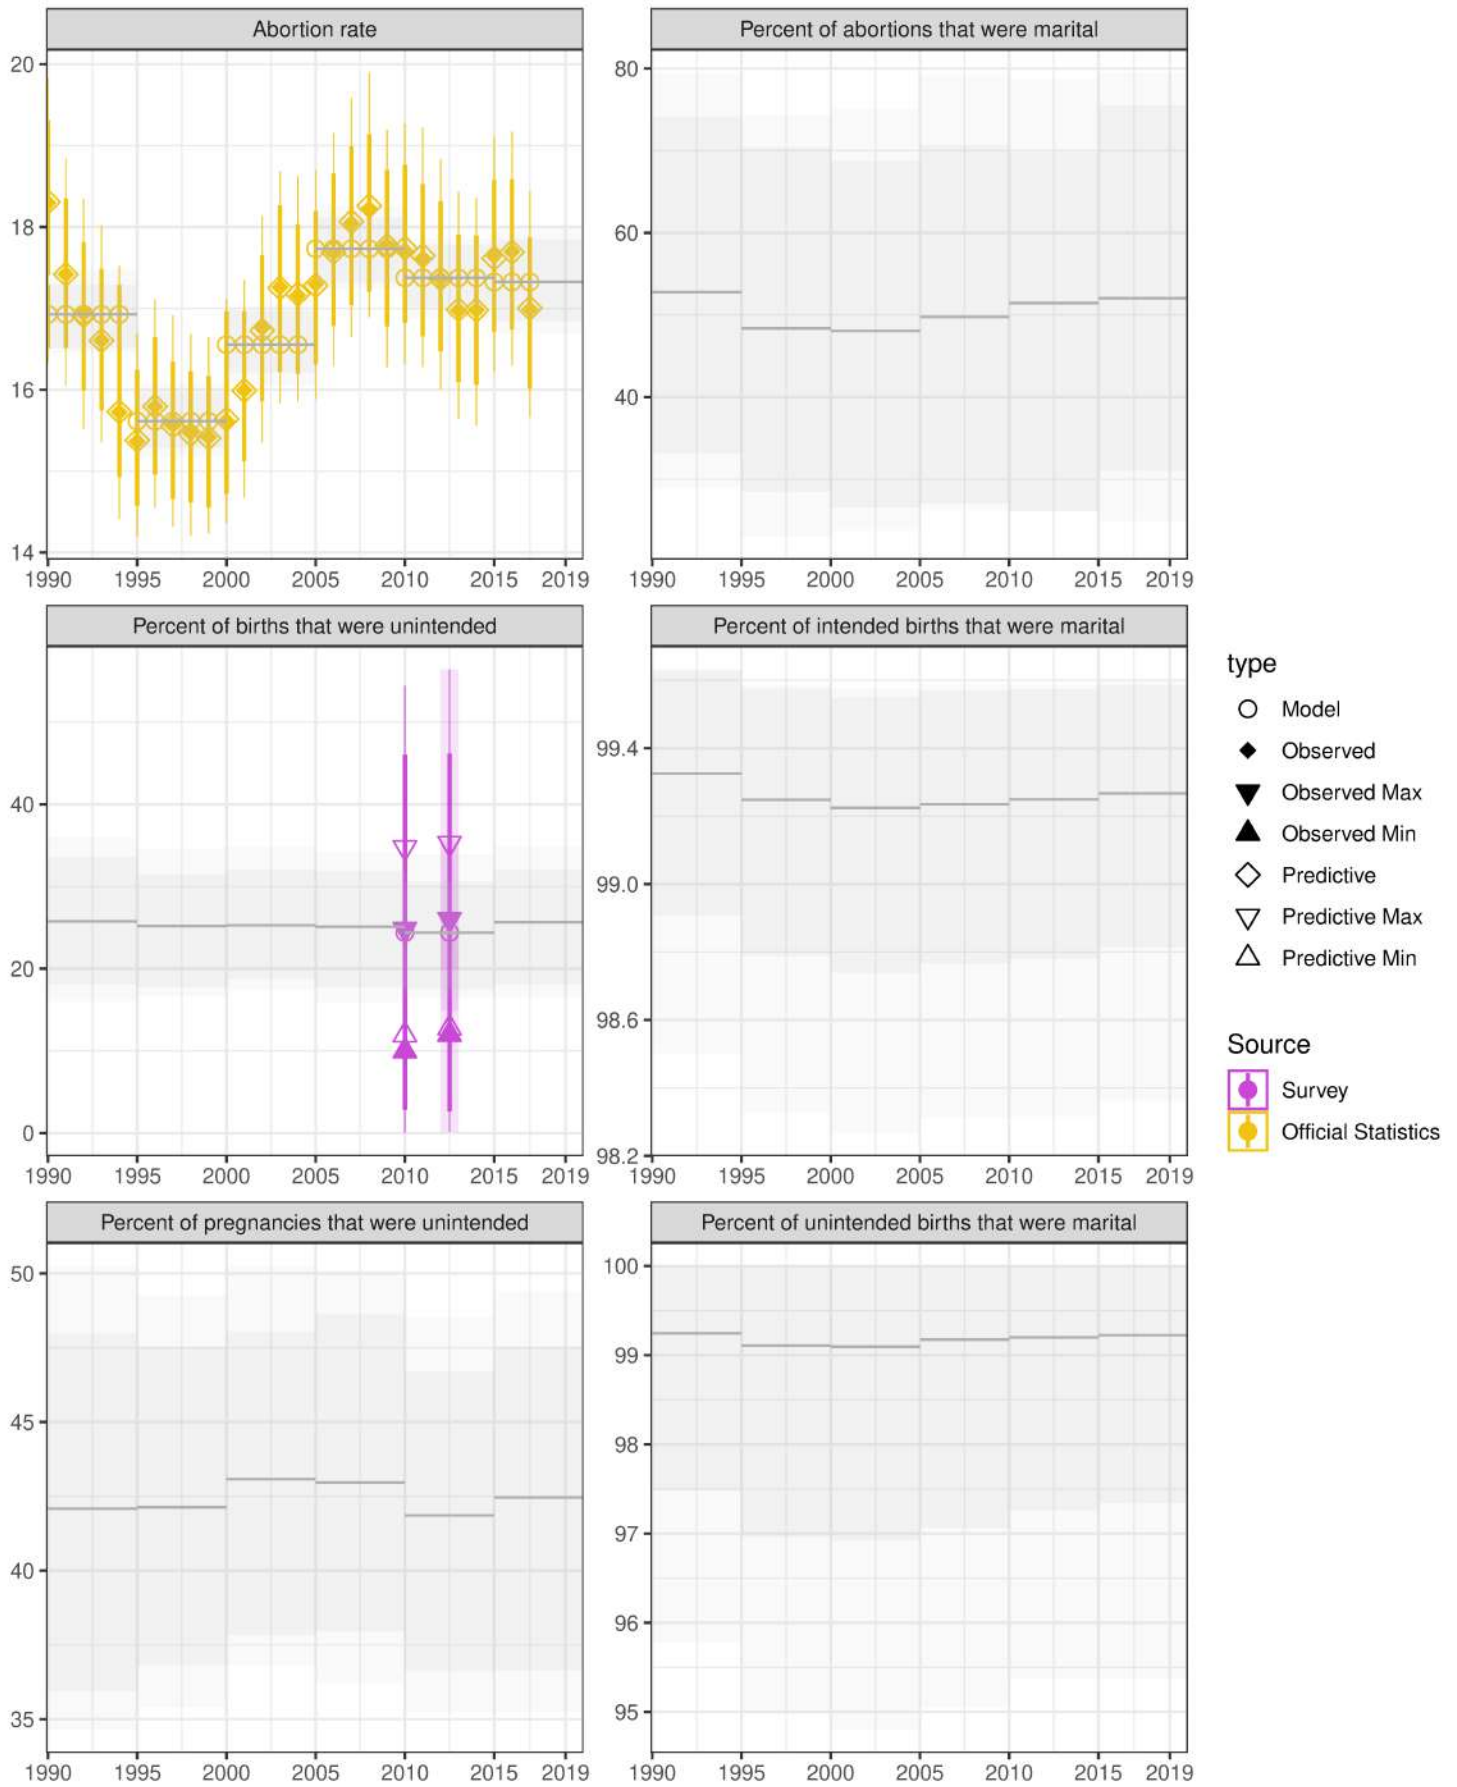

Note: Vertical lines and grey shading show 80% and 95% uncertainty intervals. Color shading shows when data were collected, if more than one year.

### United Kingdom

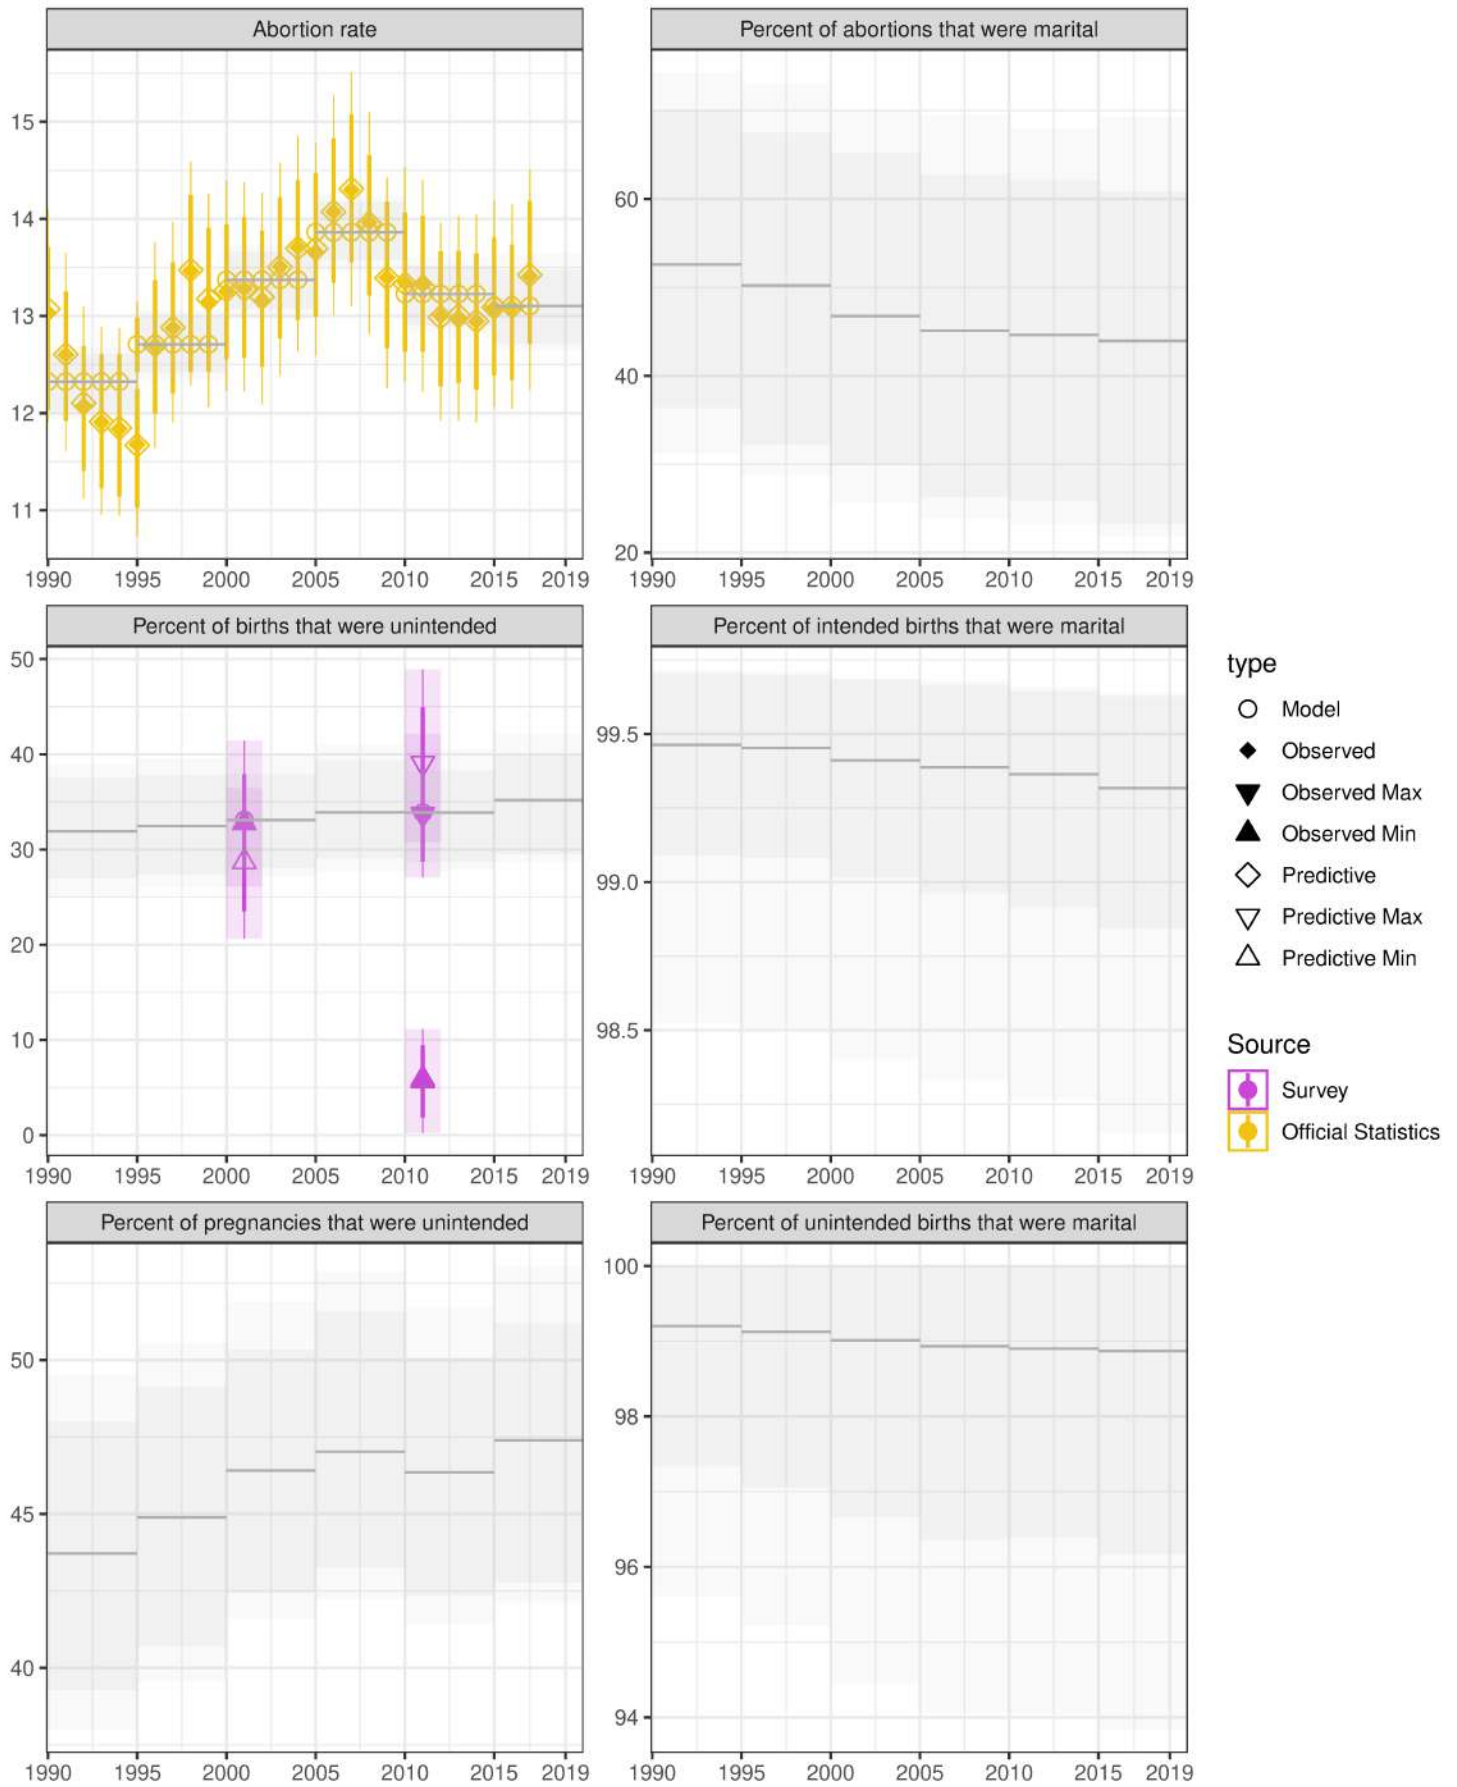

Note: Vertical lines and grey shading show 80% and 95% uncertainty intervals. Color shading shows when data were collected, if more than one year.

### 7.3 Southern Europe

Albania

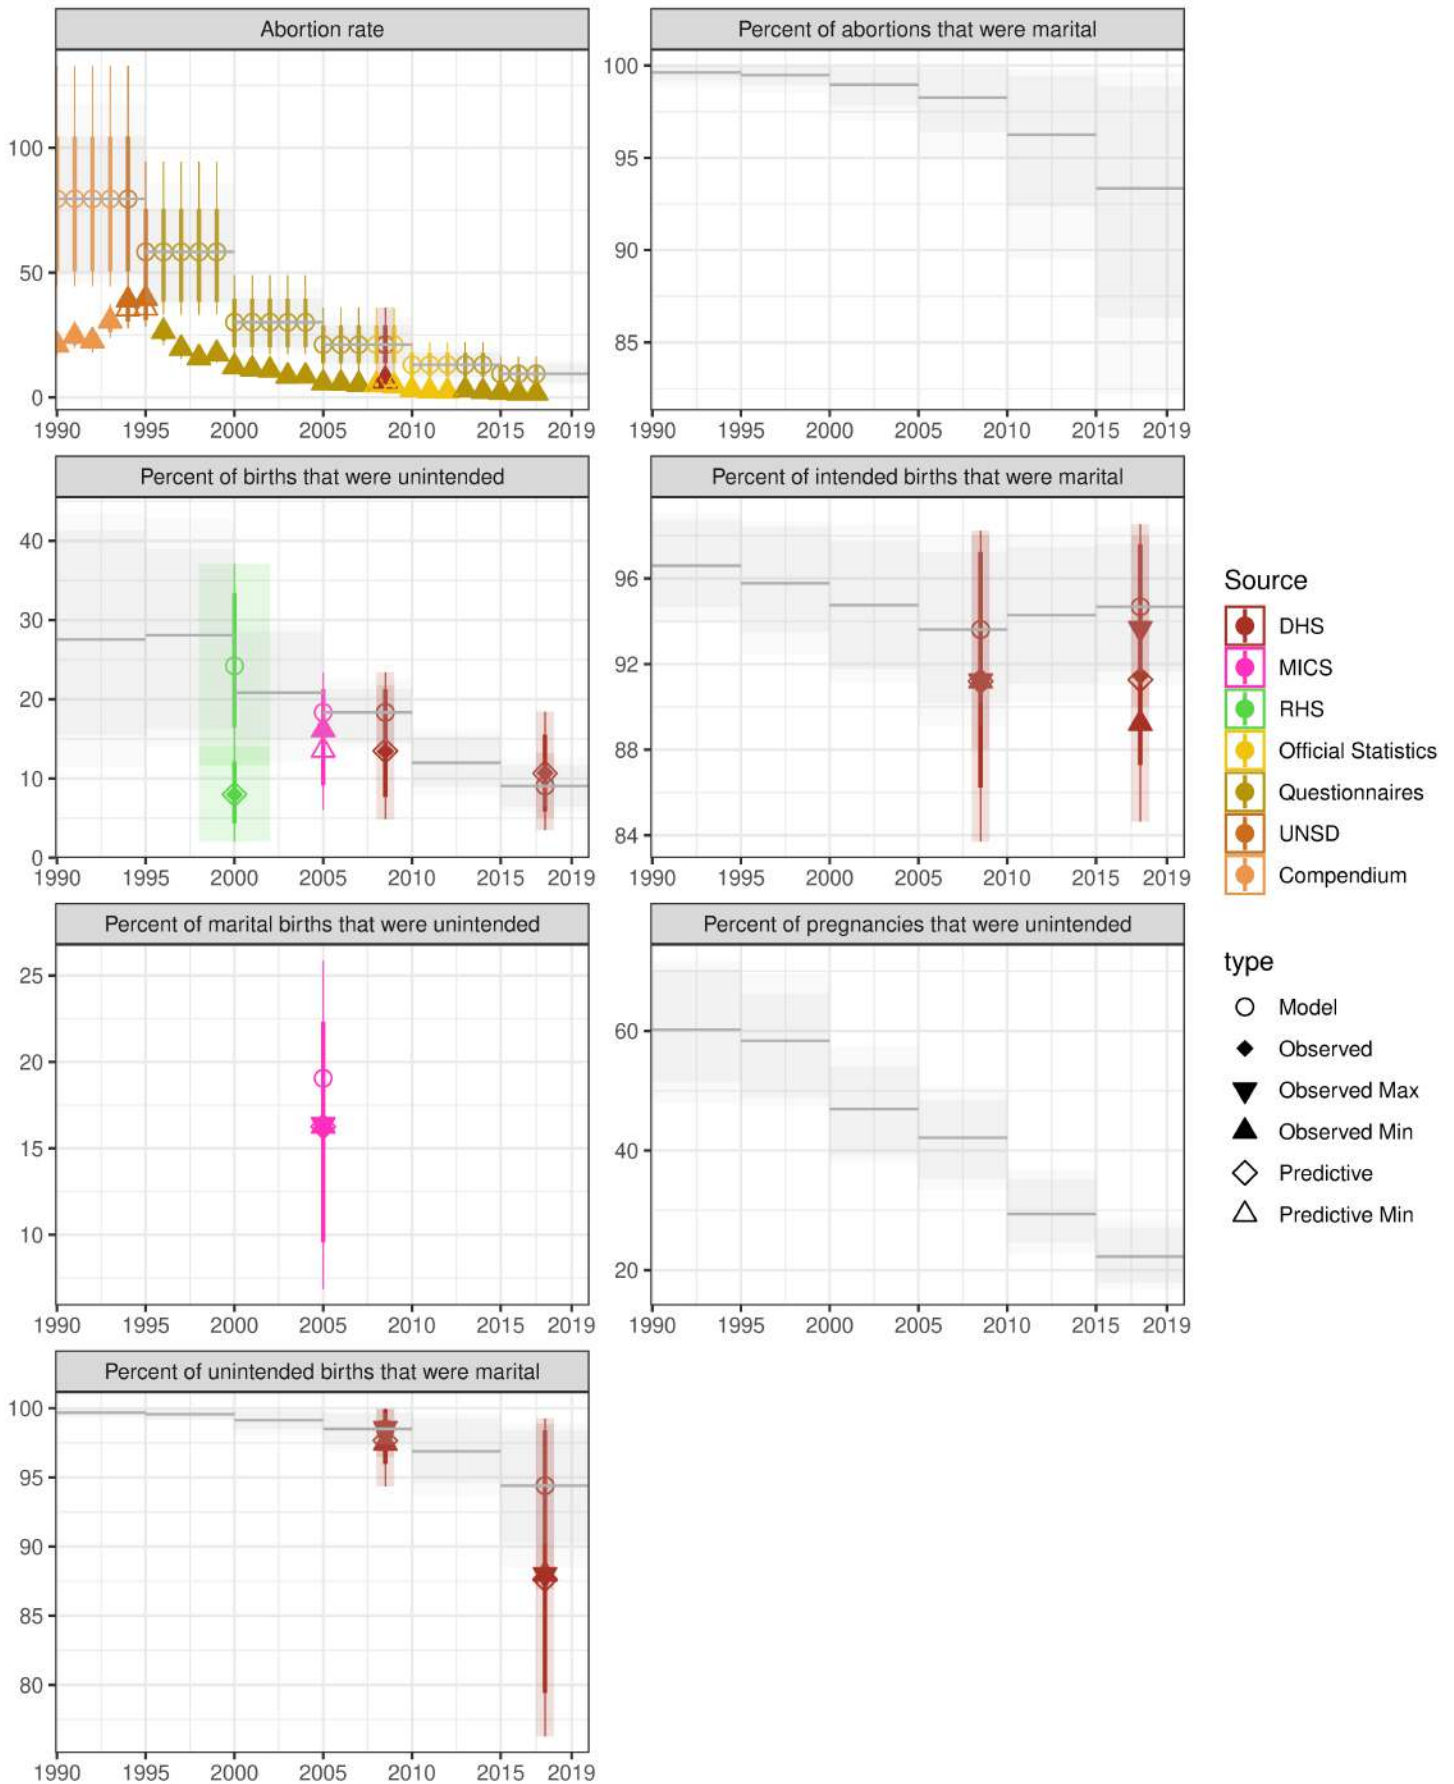

Note: Vertical lines and grey shading show 80% and 95% uncertainty intervals. Color shading shows when data were collected, if more than one year.



### Bosnia and Herzegovina

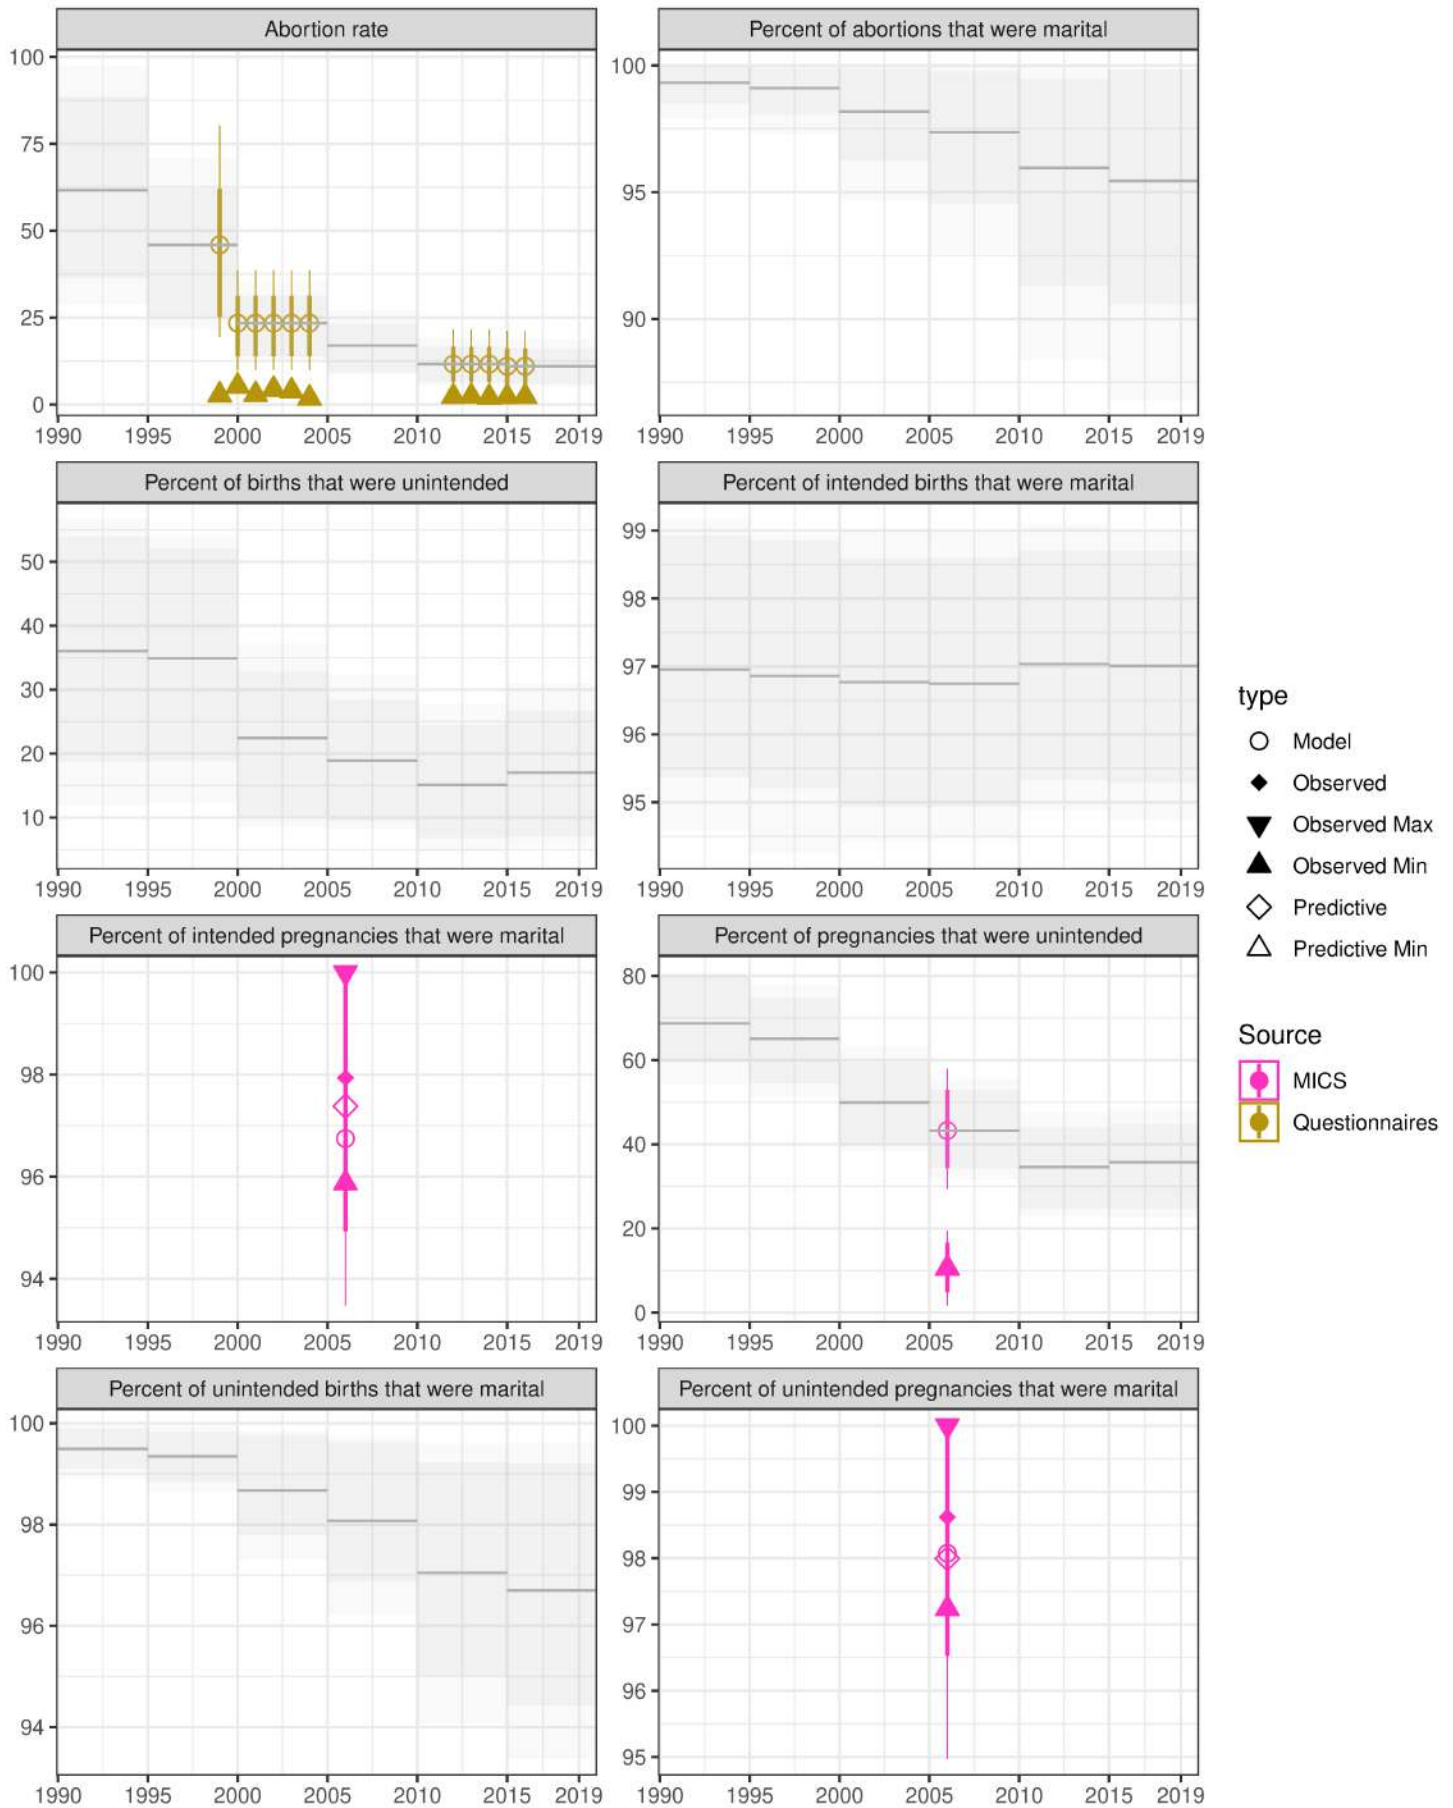

Note: Vertical lines and grey shading show 80% and 95% uncertainty intervals.

### Croatia

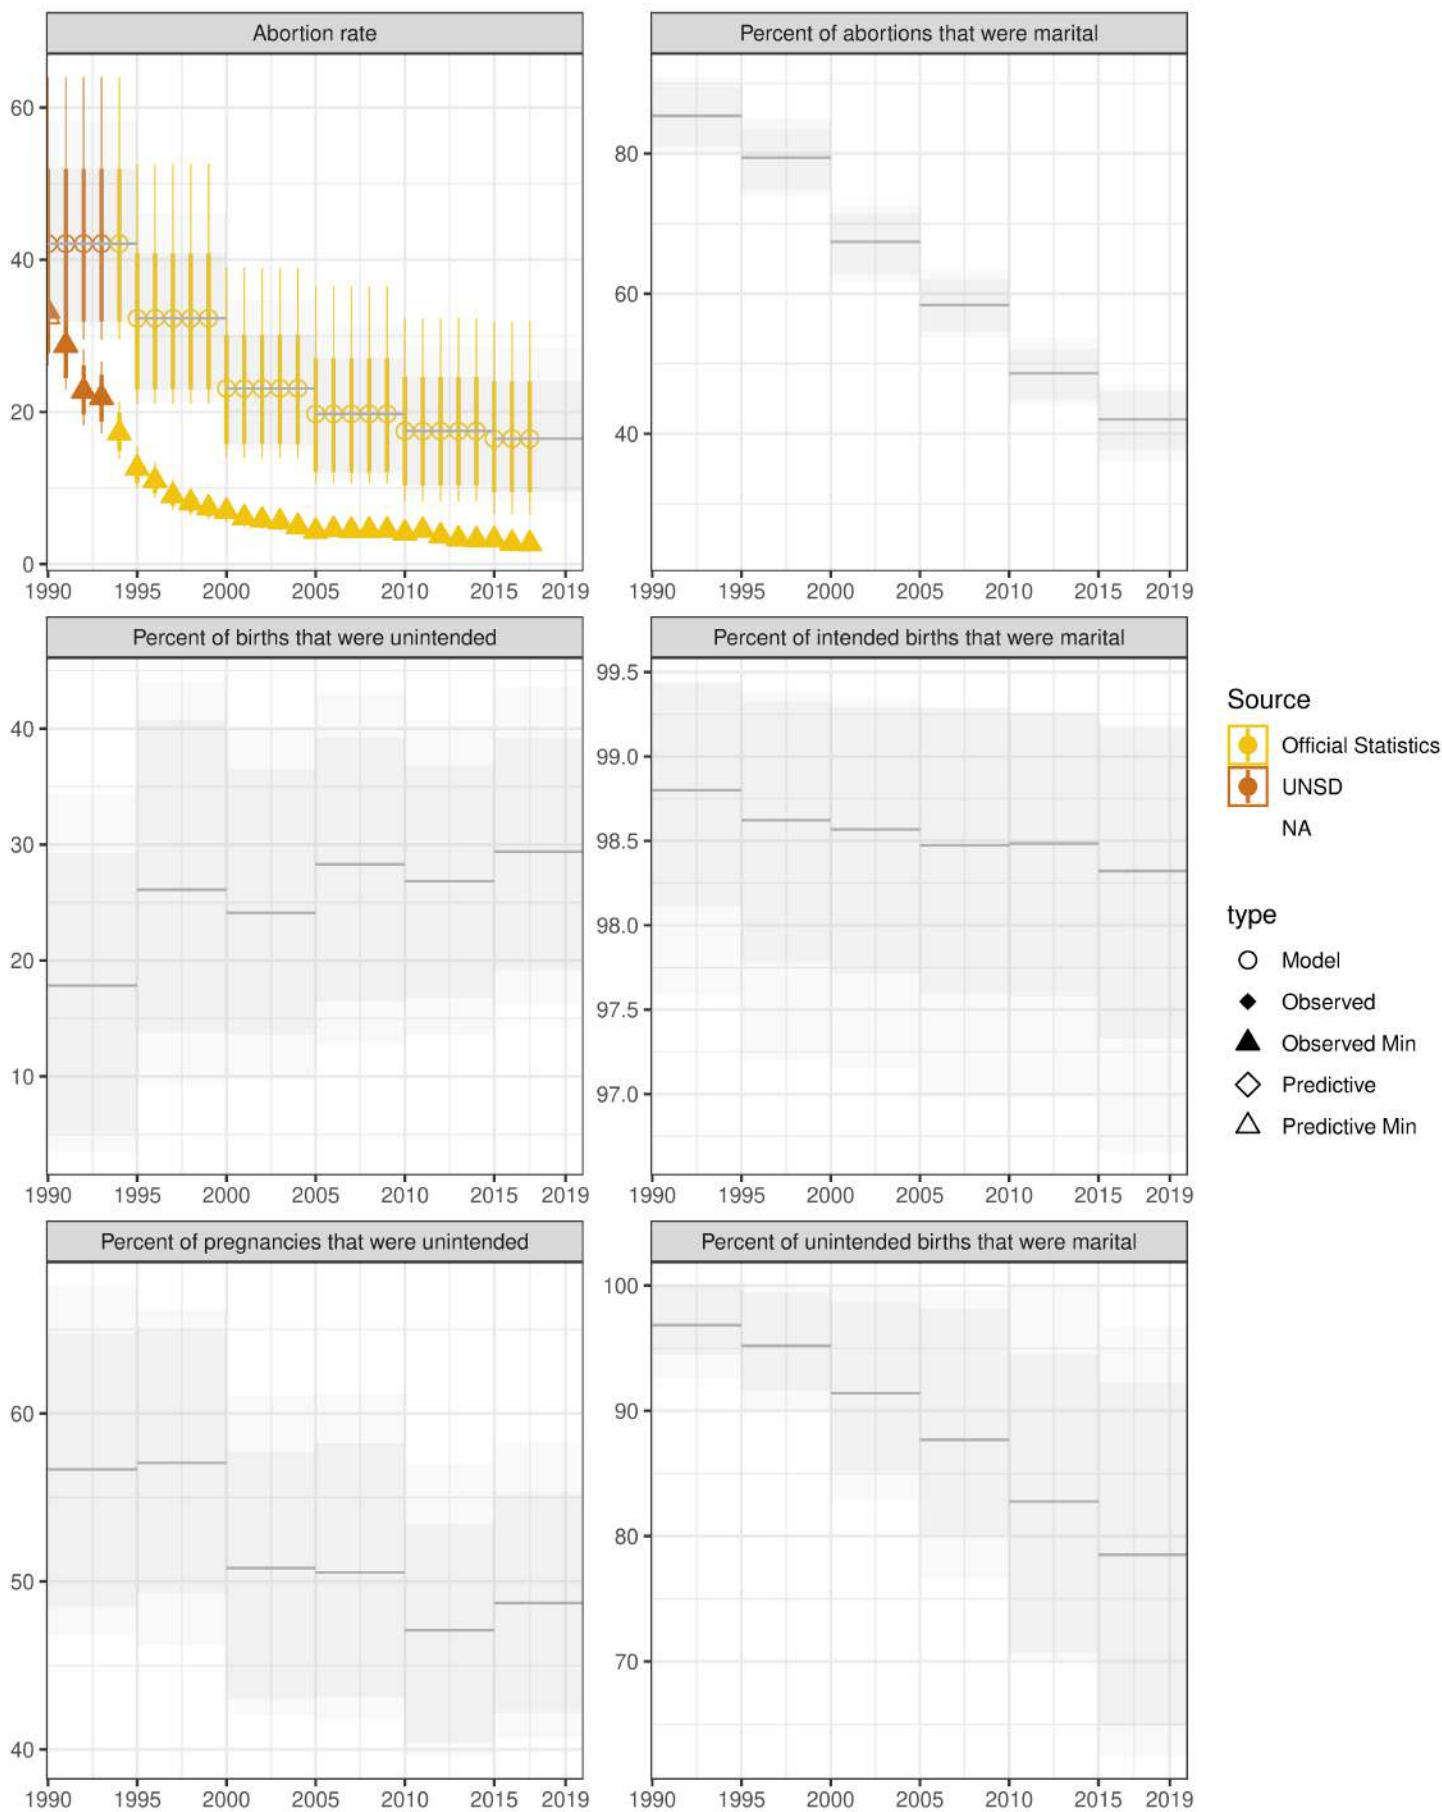

Note: Vertical lines and grey shading show 80% and 95% uncertainty intervals.

### Greece

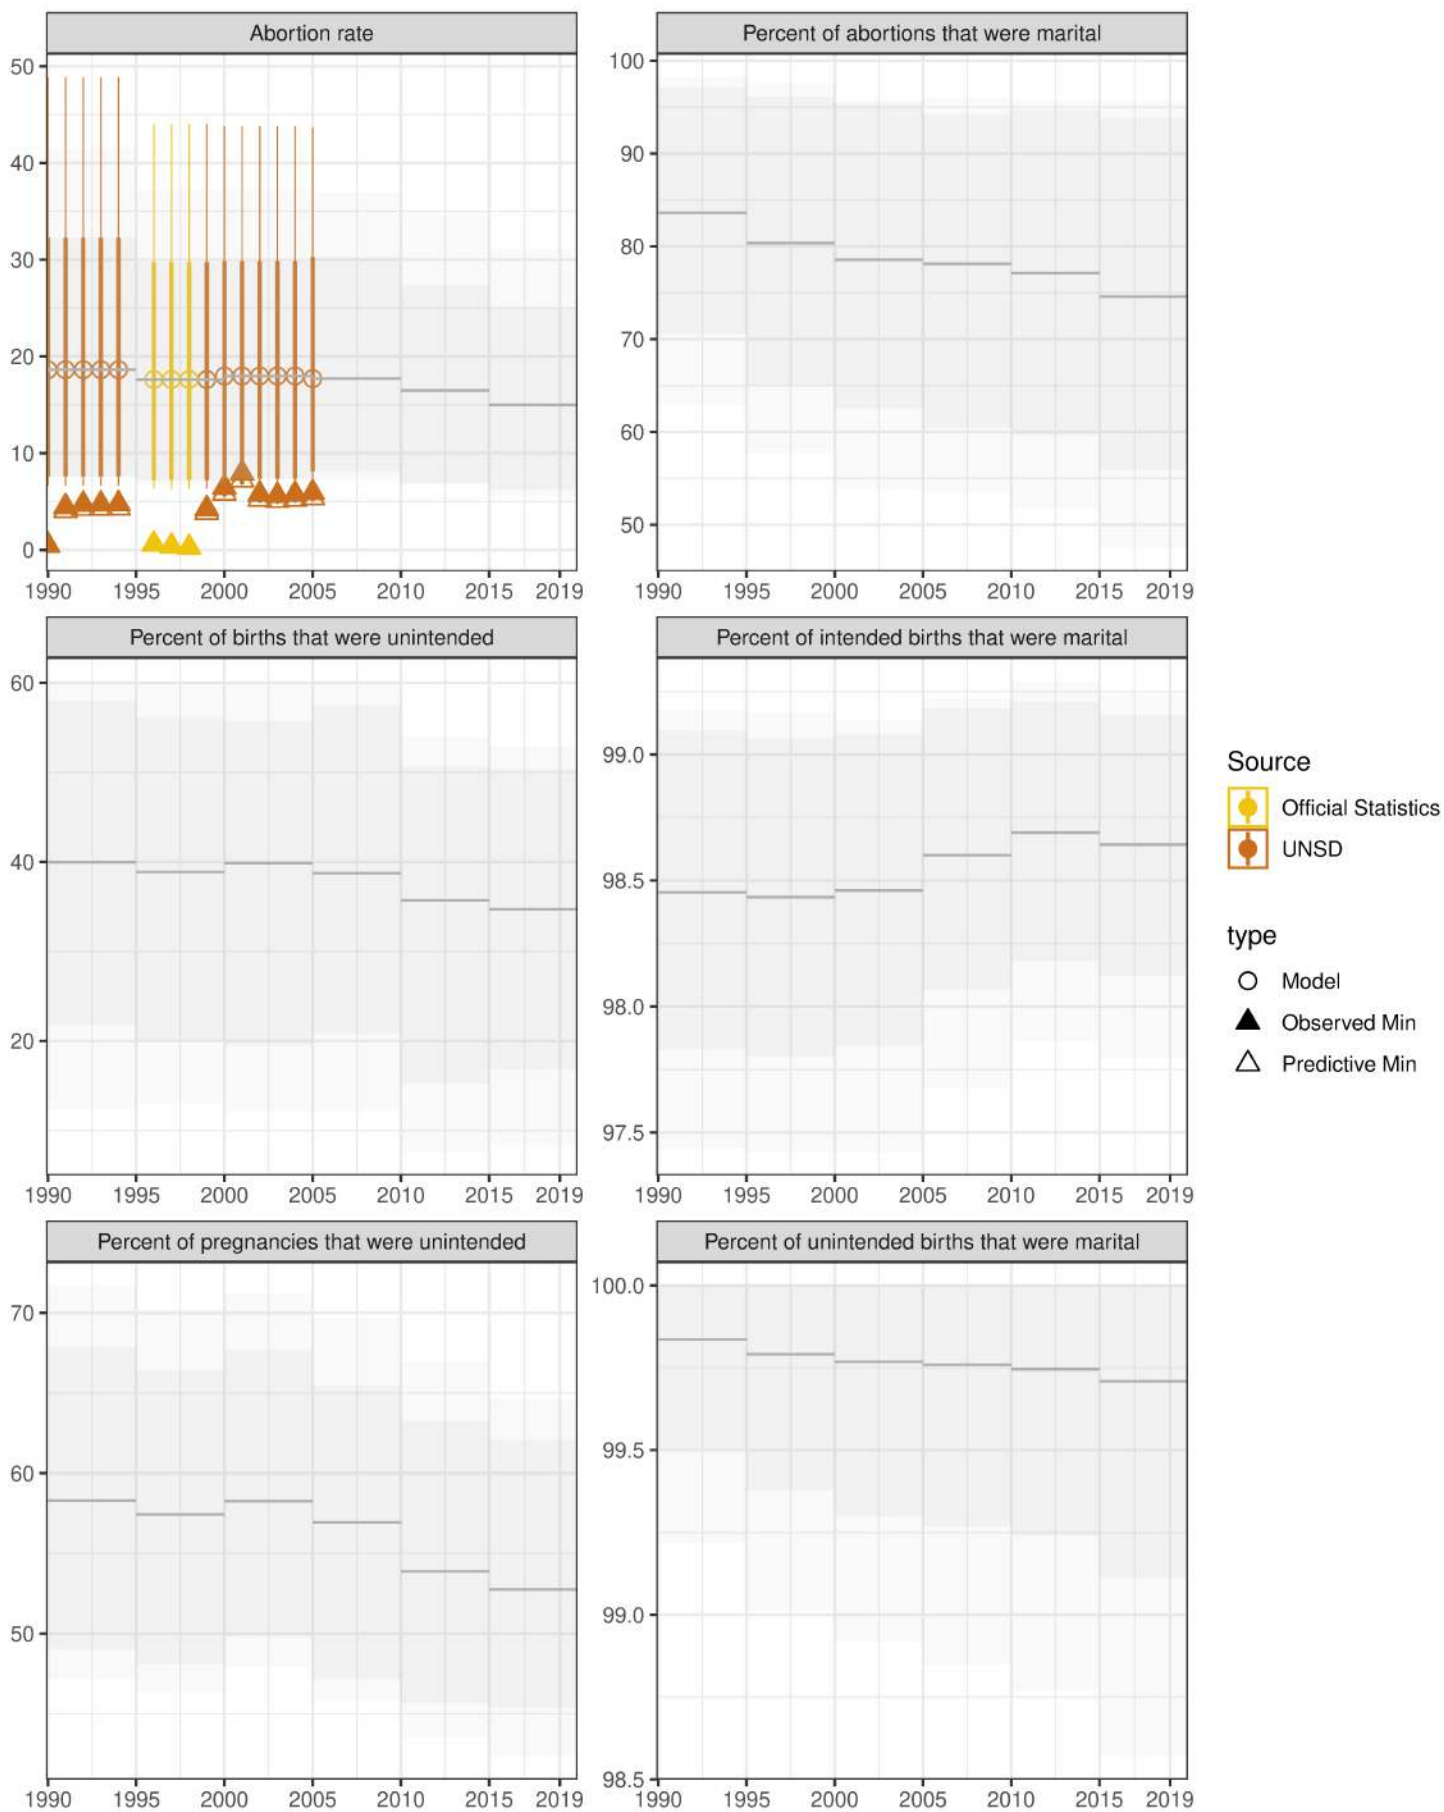

Note: Vertical lines and grey shading show 80% and 95% uncertainty intervals.

### Italy

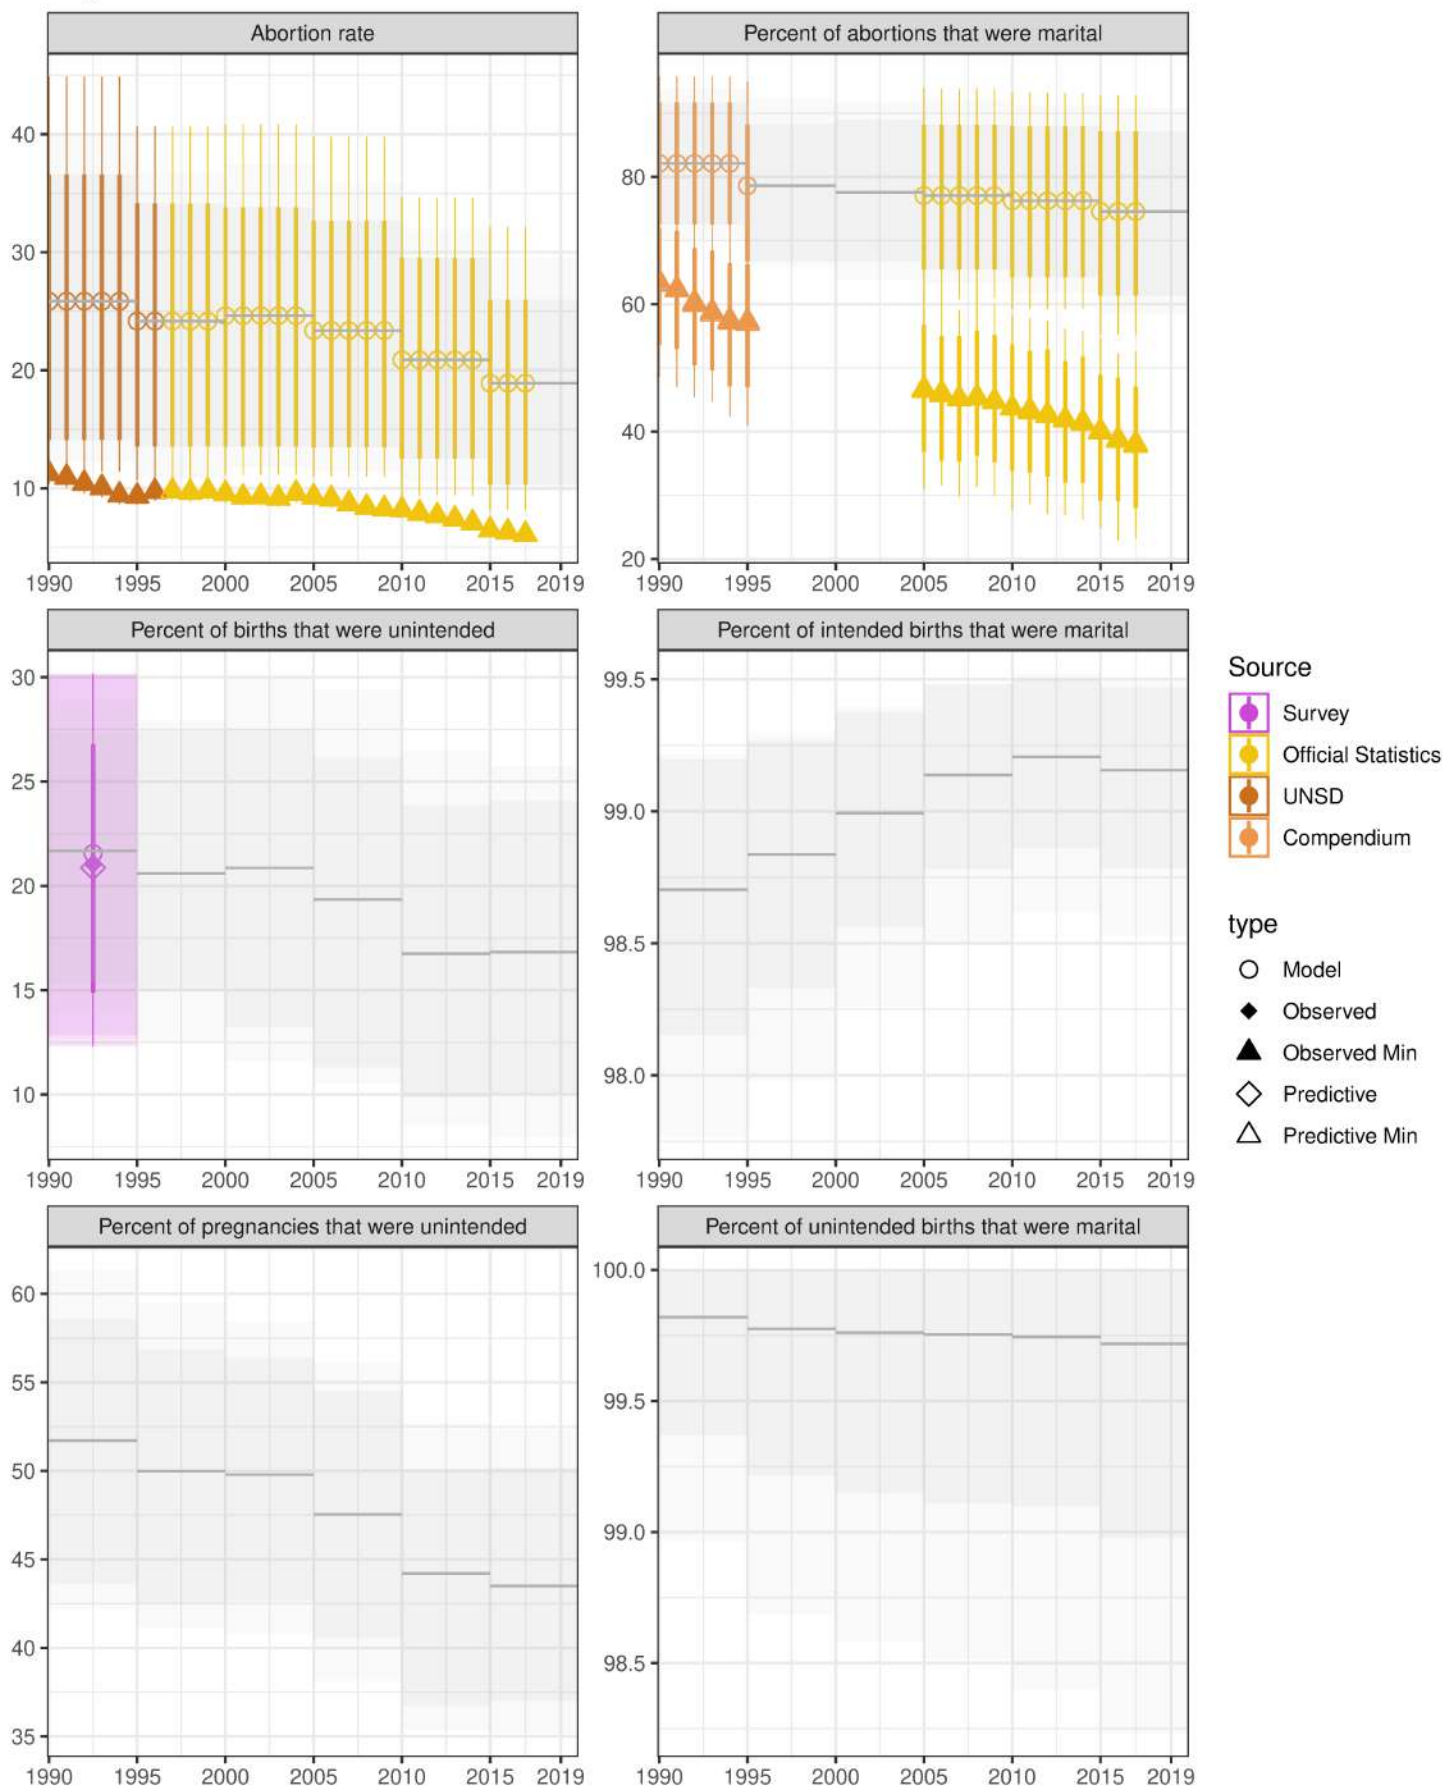

Note: Vertical lines and grey shading show 80% and 95% uncertainty intervals. Color shading shows when data were collected, if more than one year.

### Montenegro

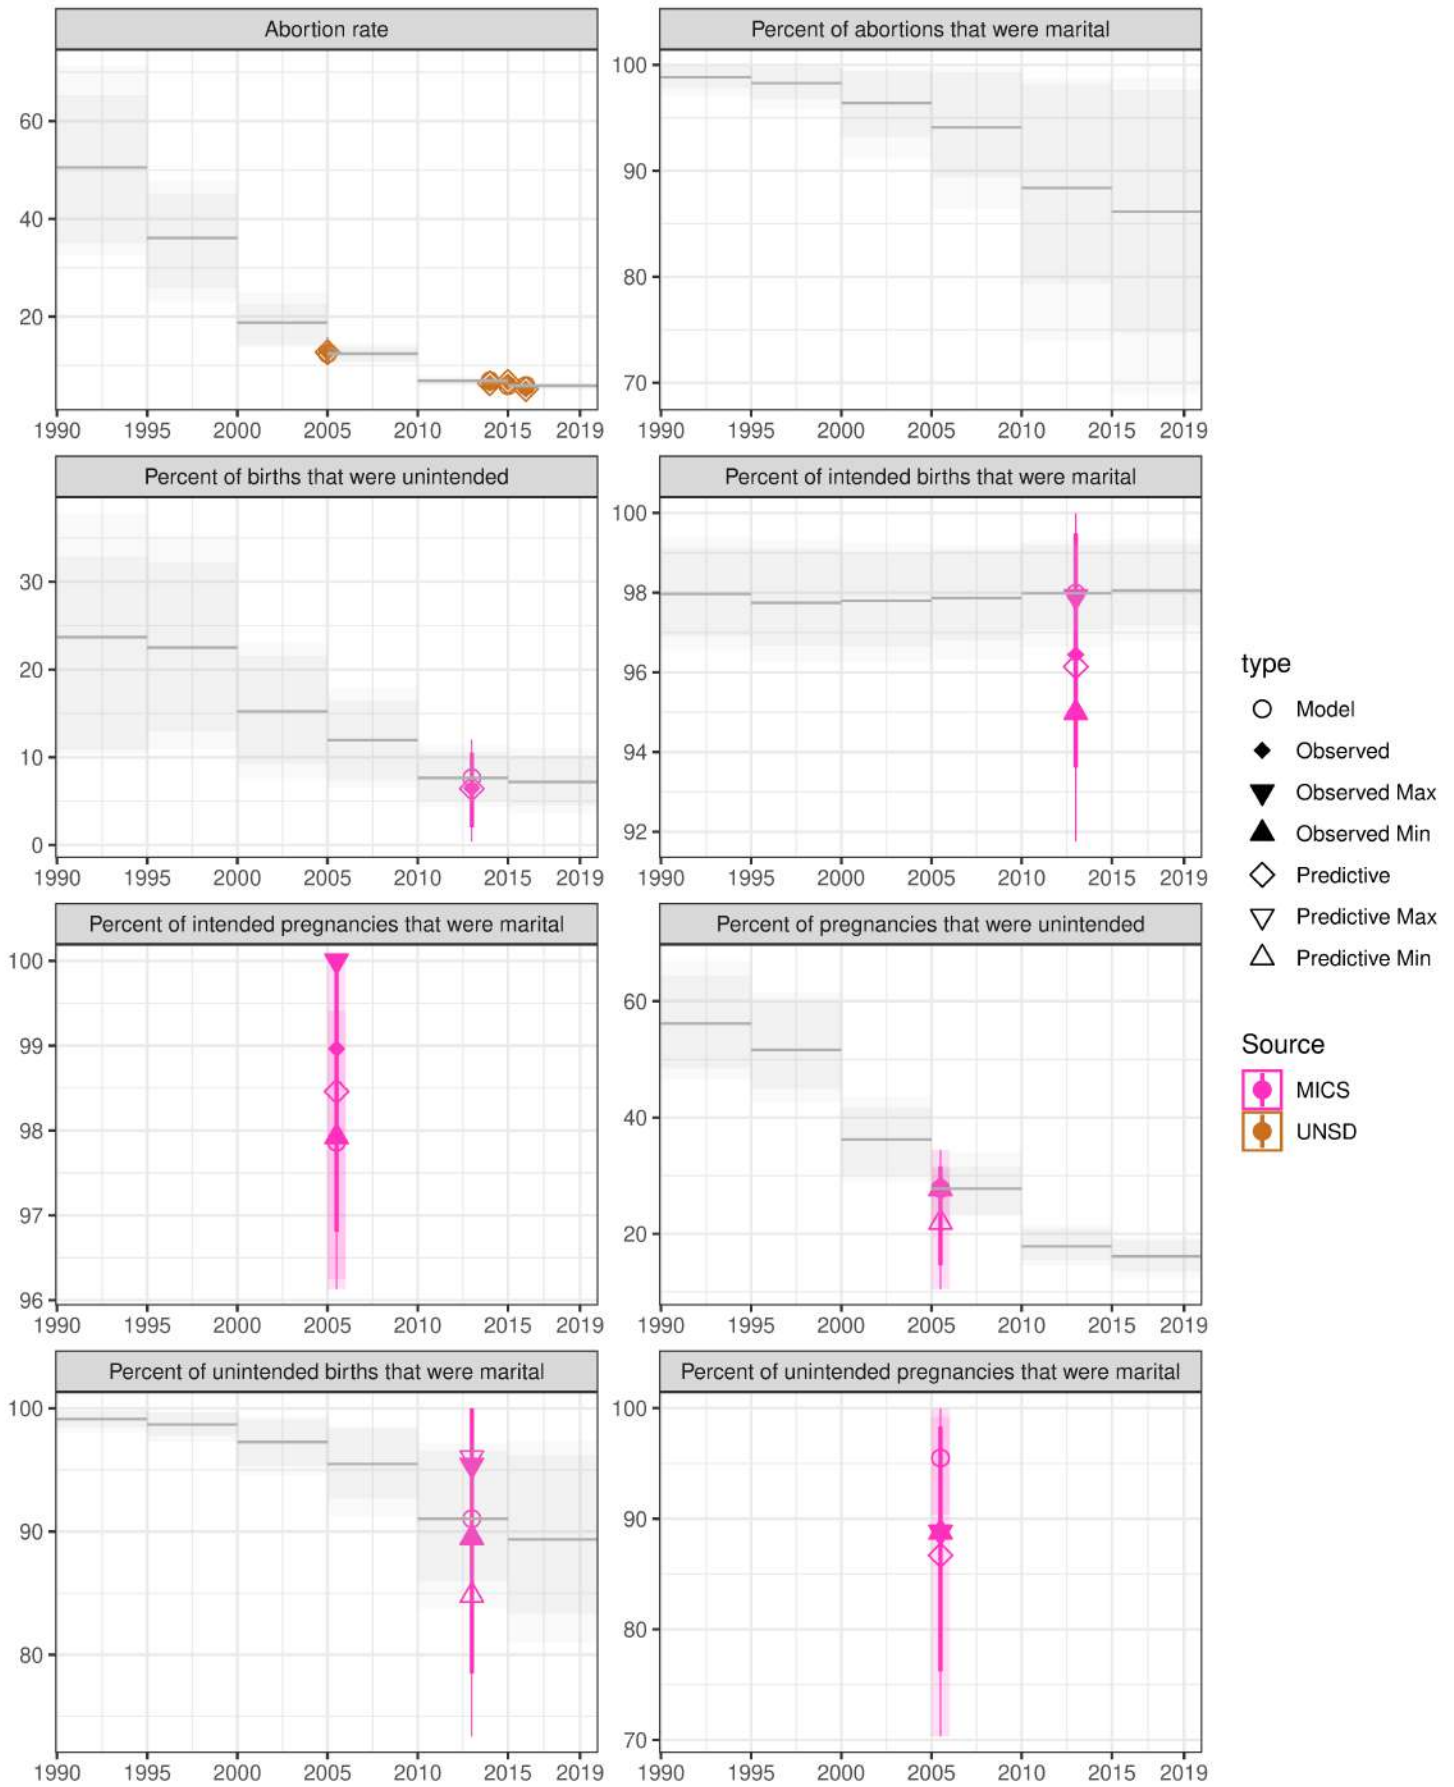

Note: Vertical lines and grey shading show 80% and 95% uncertainty intervals. Color shading shows when data were collected, if more than one year.

### North Macedonia

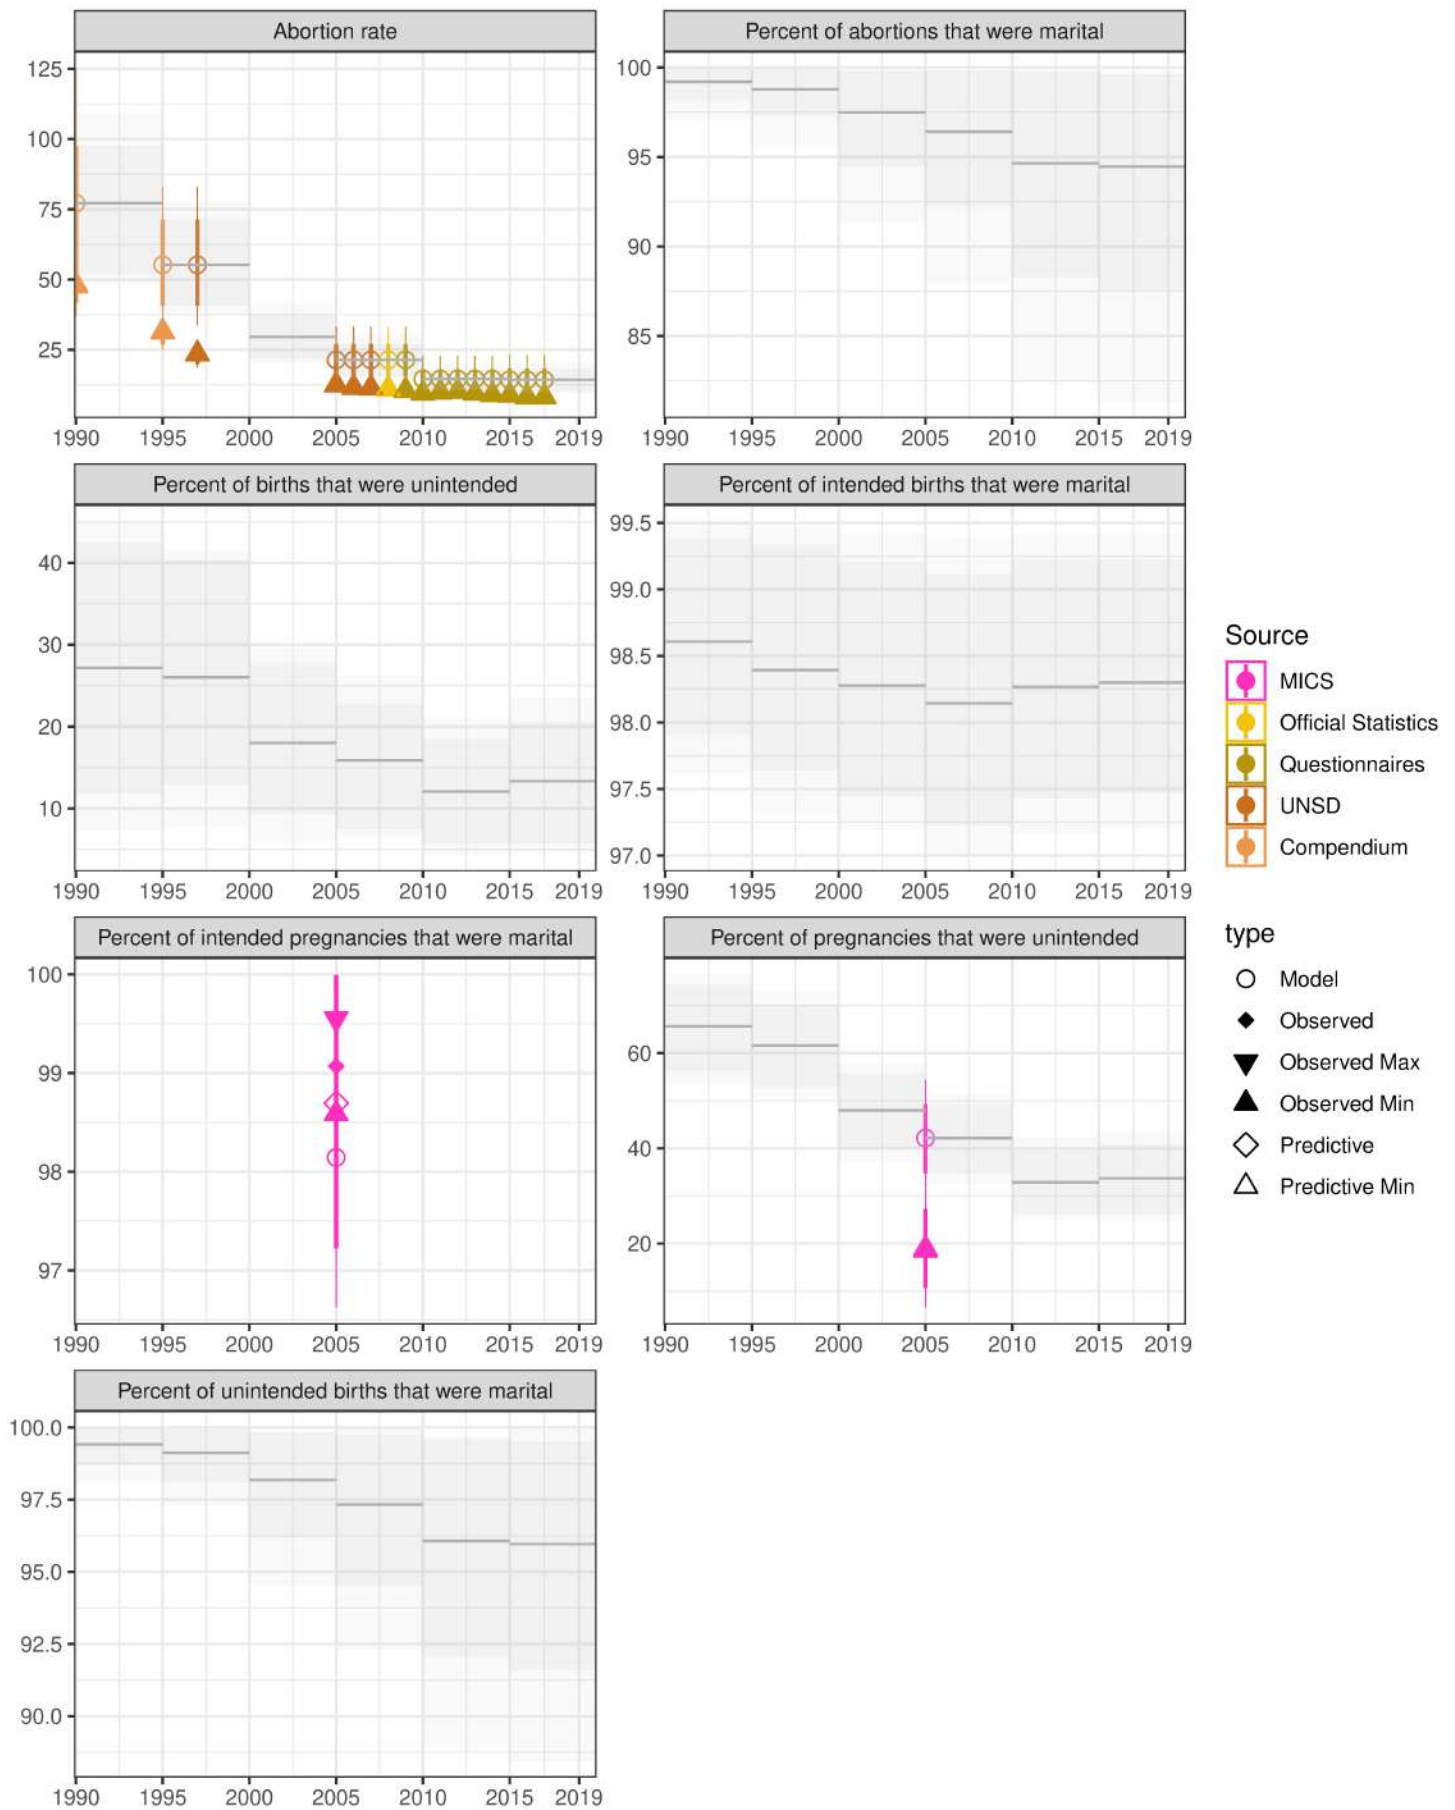

Note: Vertical lines and grey shading show 80% and 95% uncertainty intervals.

### Portugal

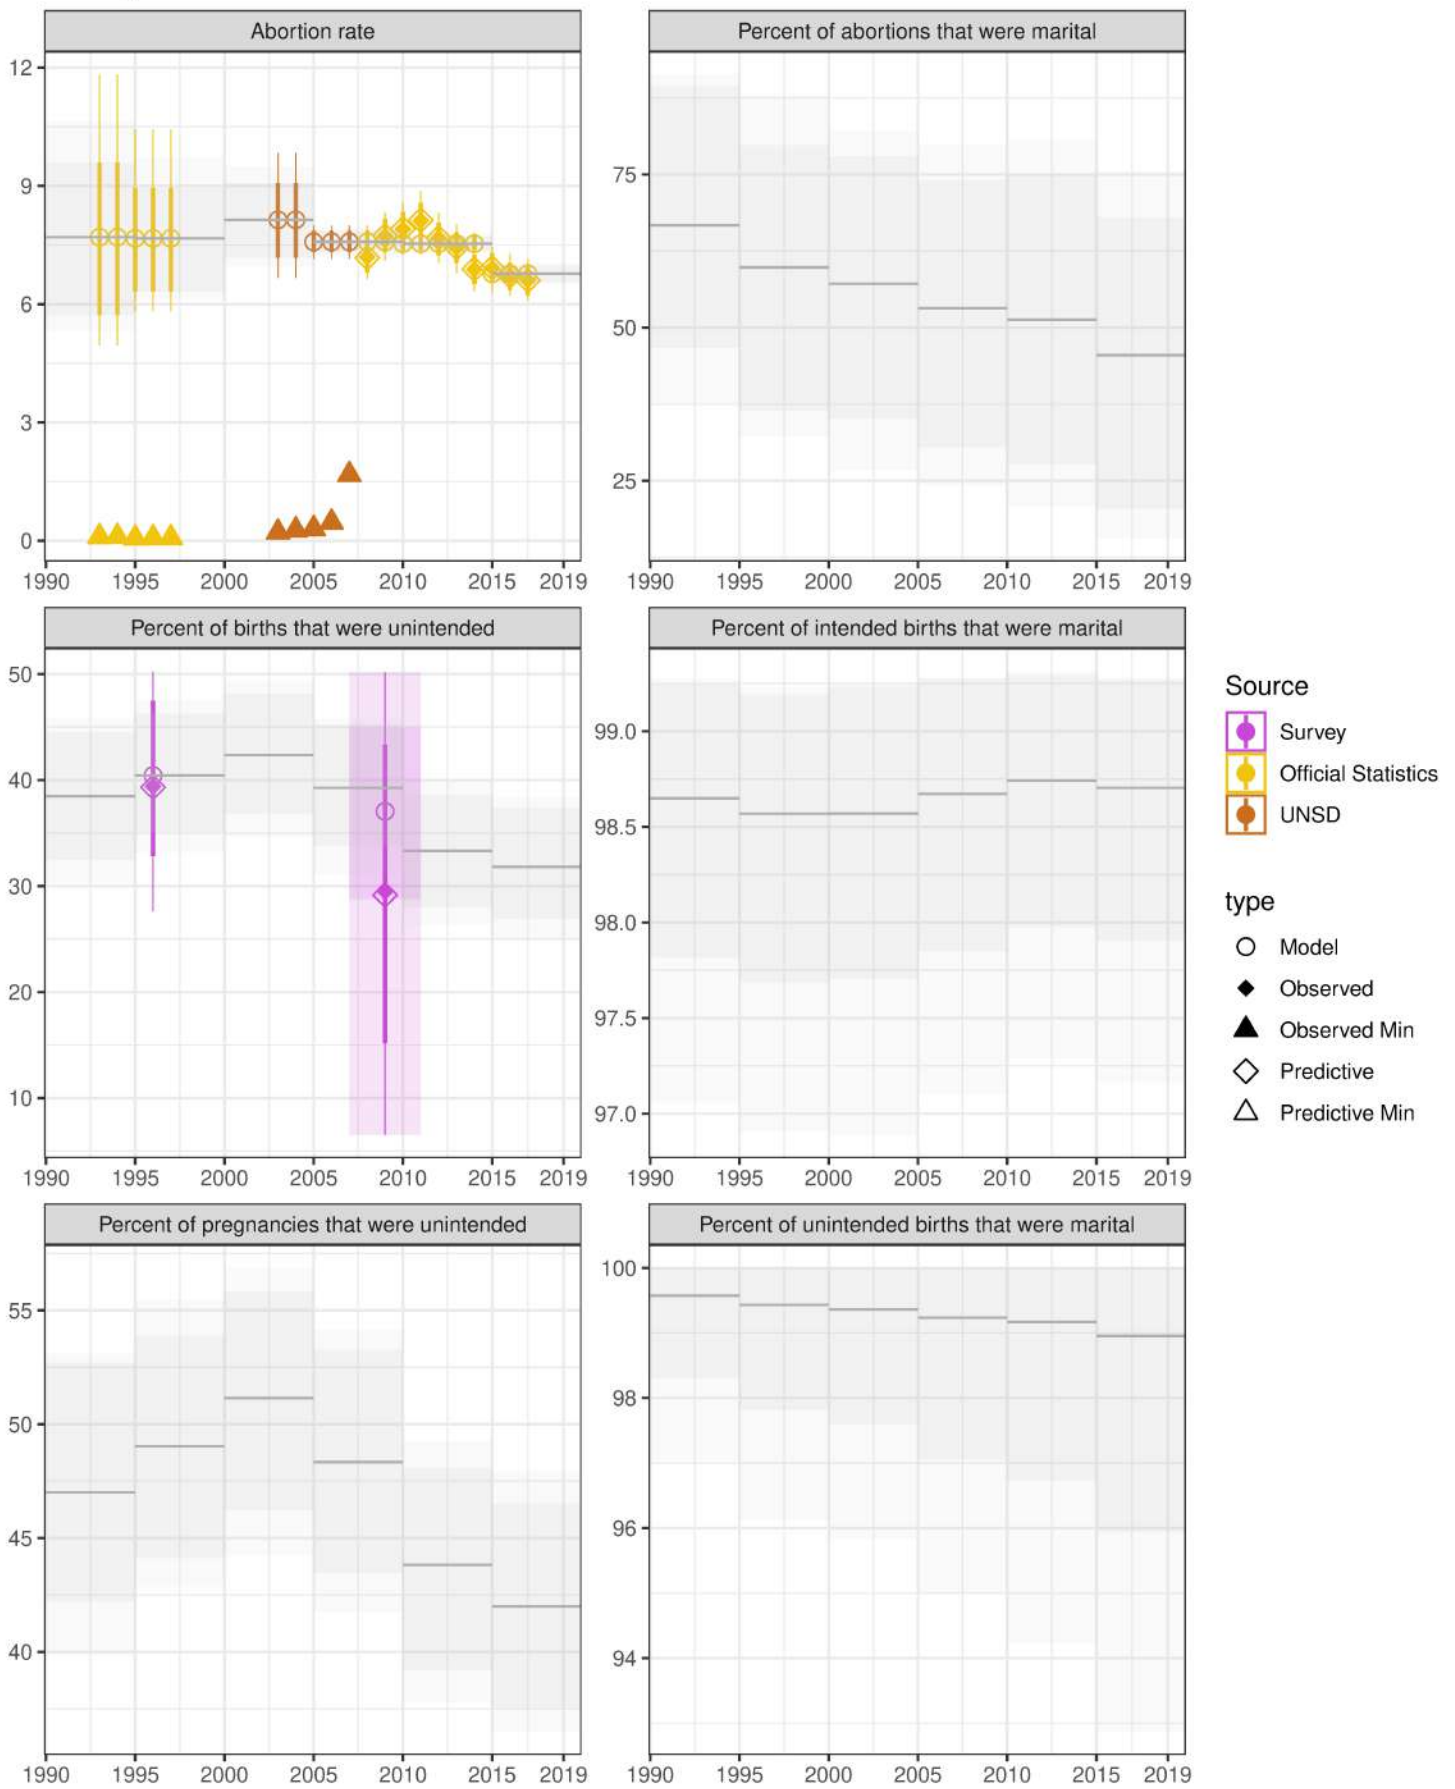

Note: Vertical lines and grey shading show 80% and 95% uncertainty intervals. Color shading shows when data were collected, if more than one year.

### Serbia

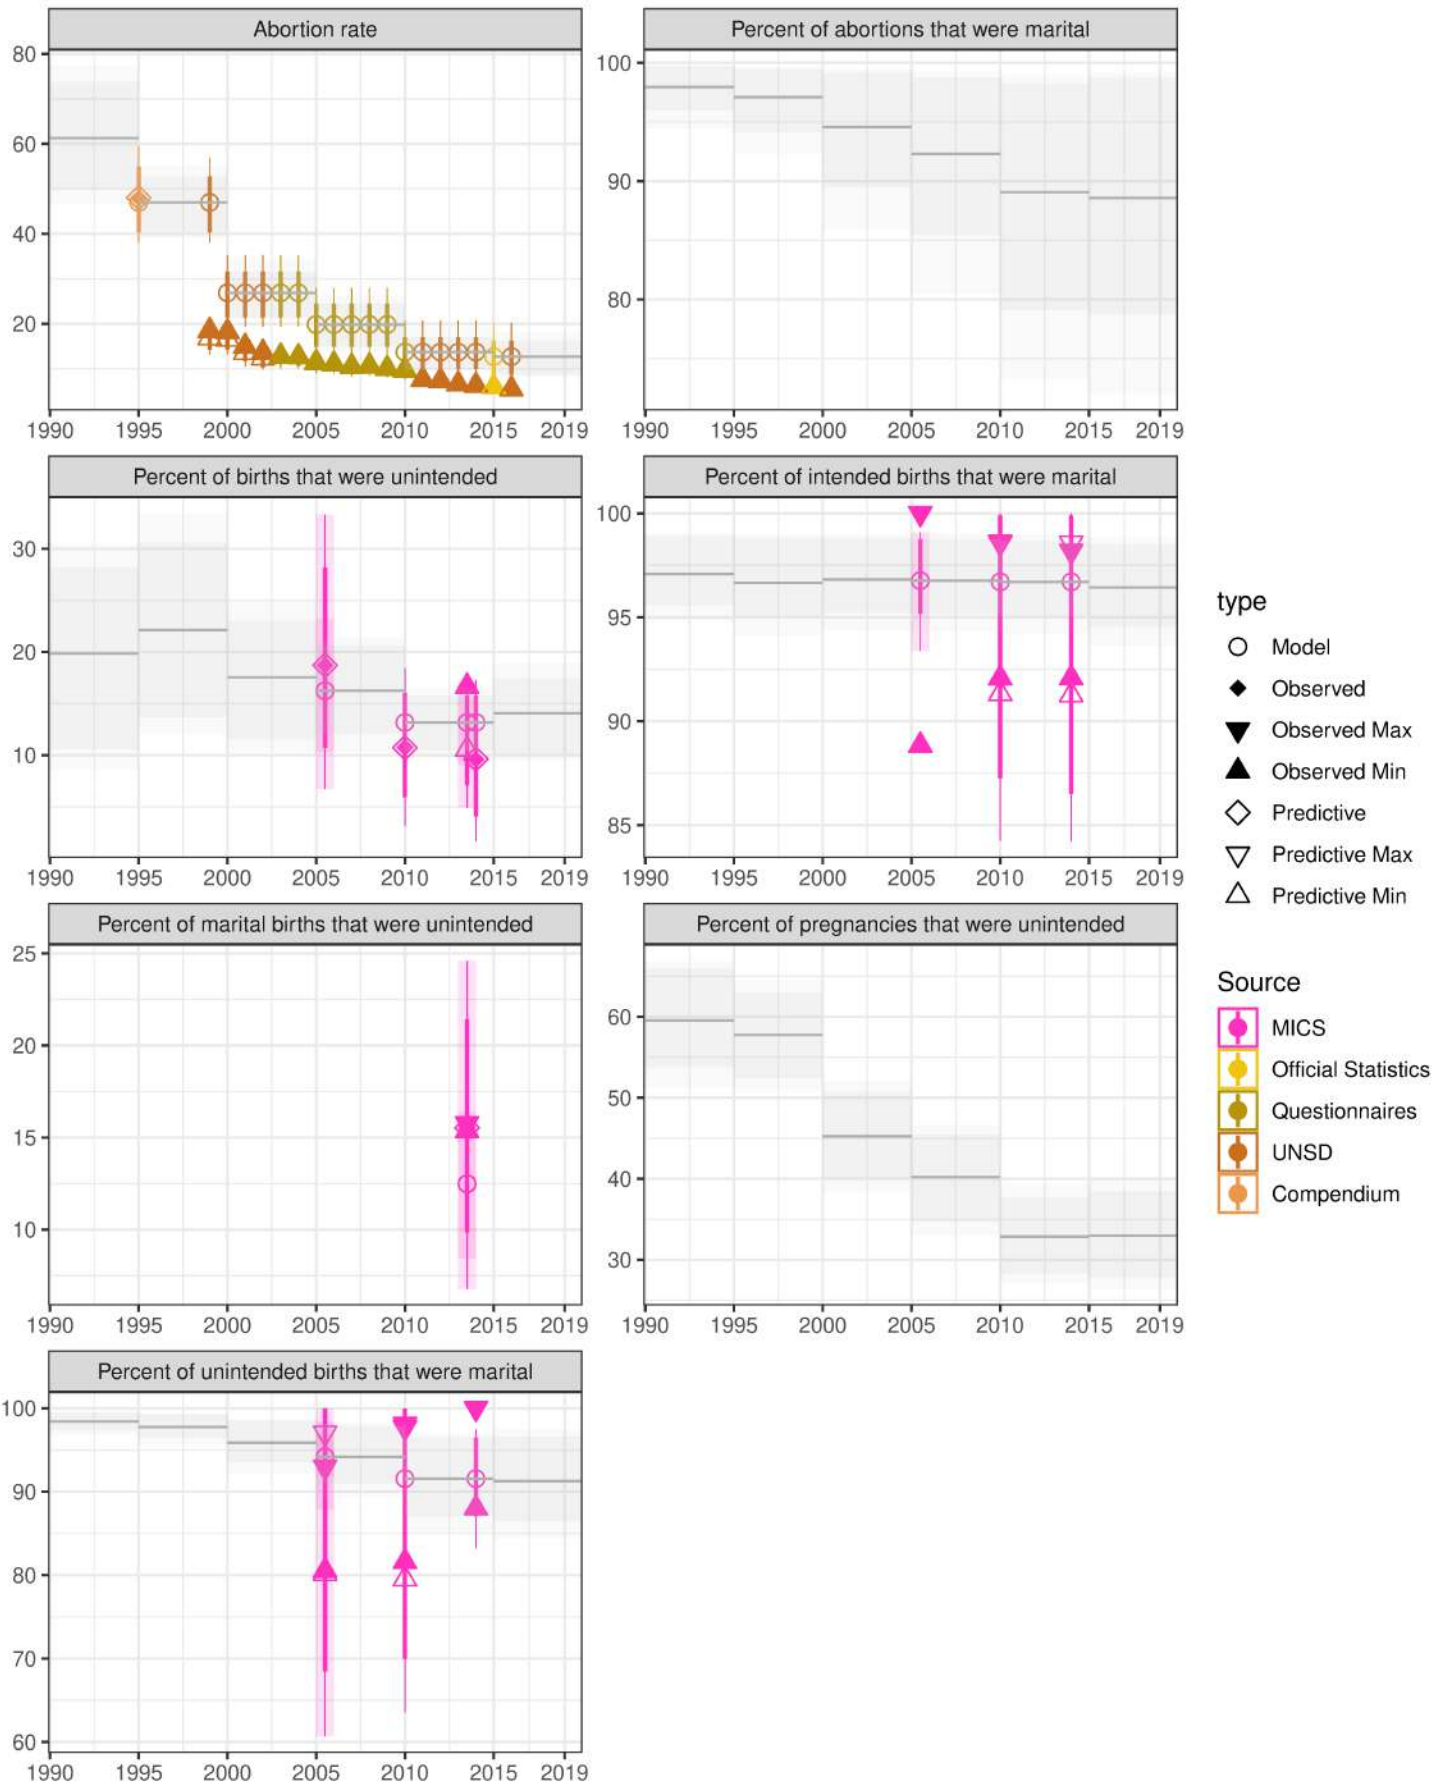

Note: Vertical lines and grey shading show 80% and 95% uncertainty intervals. Color shading shows when data were collected, if more than one year.



### Slovenia

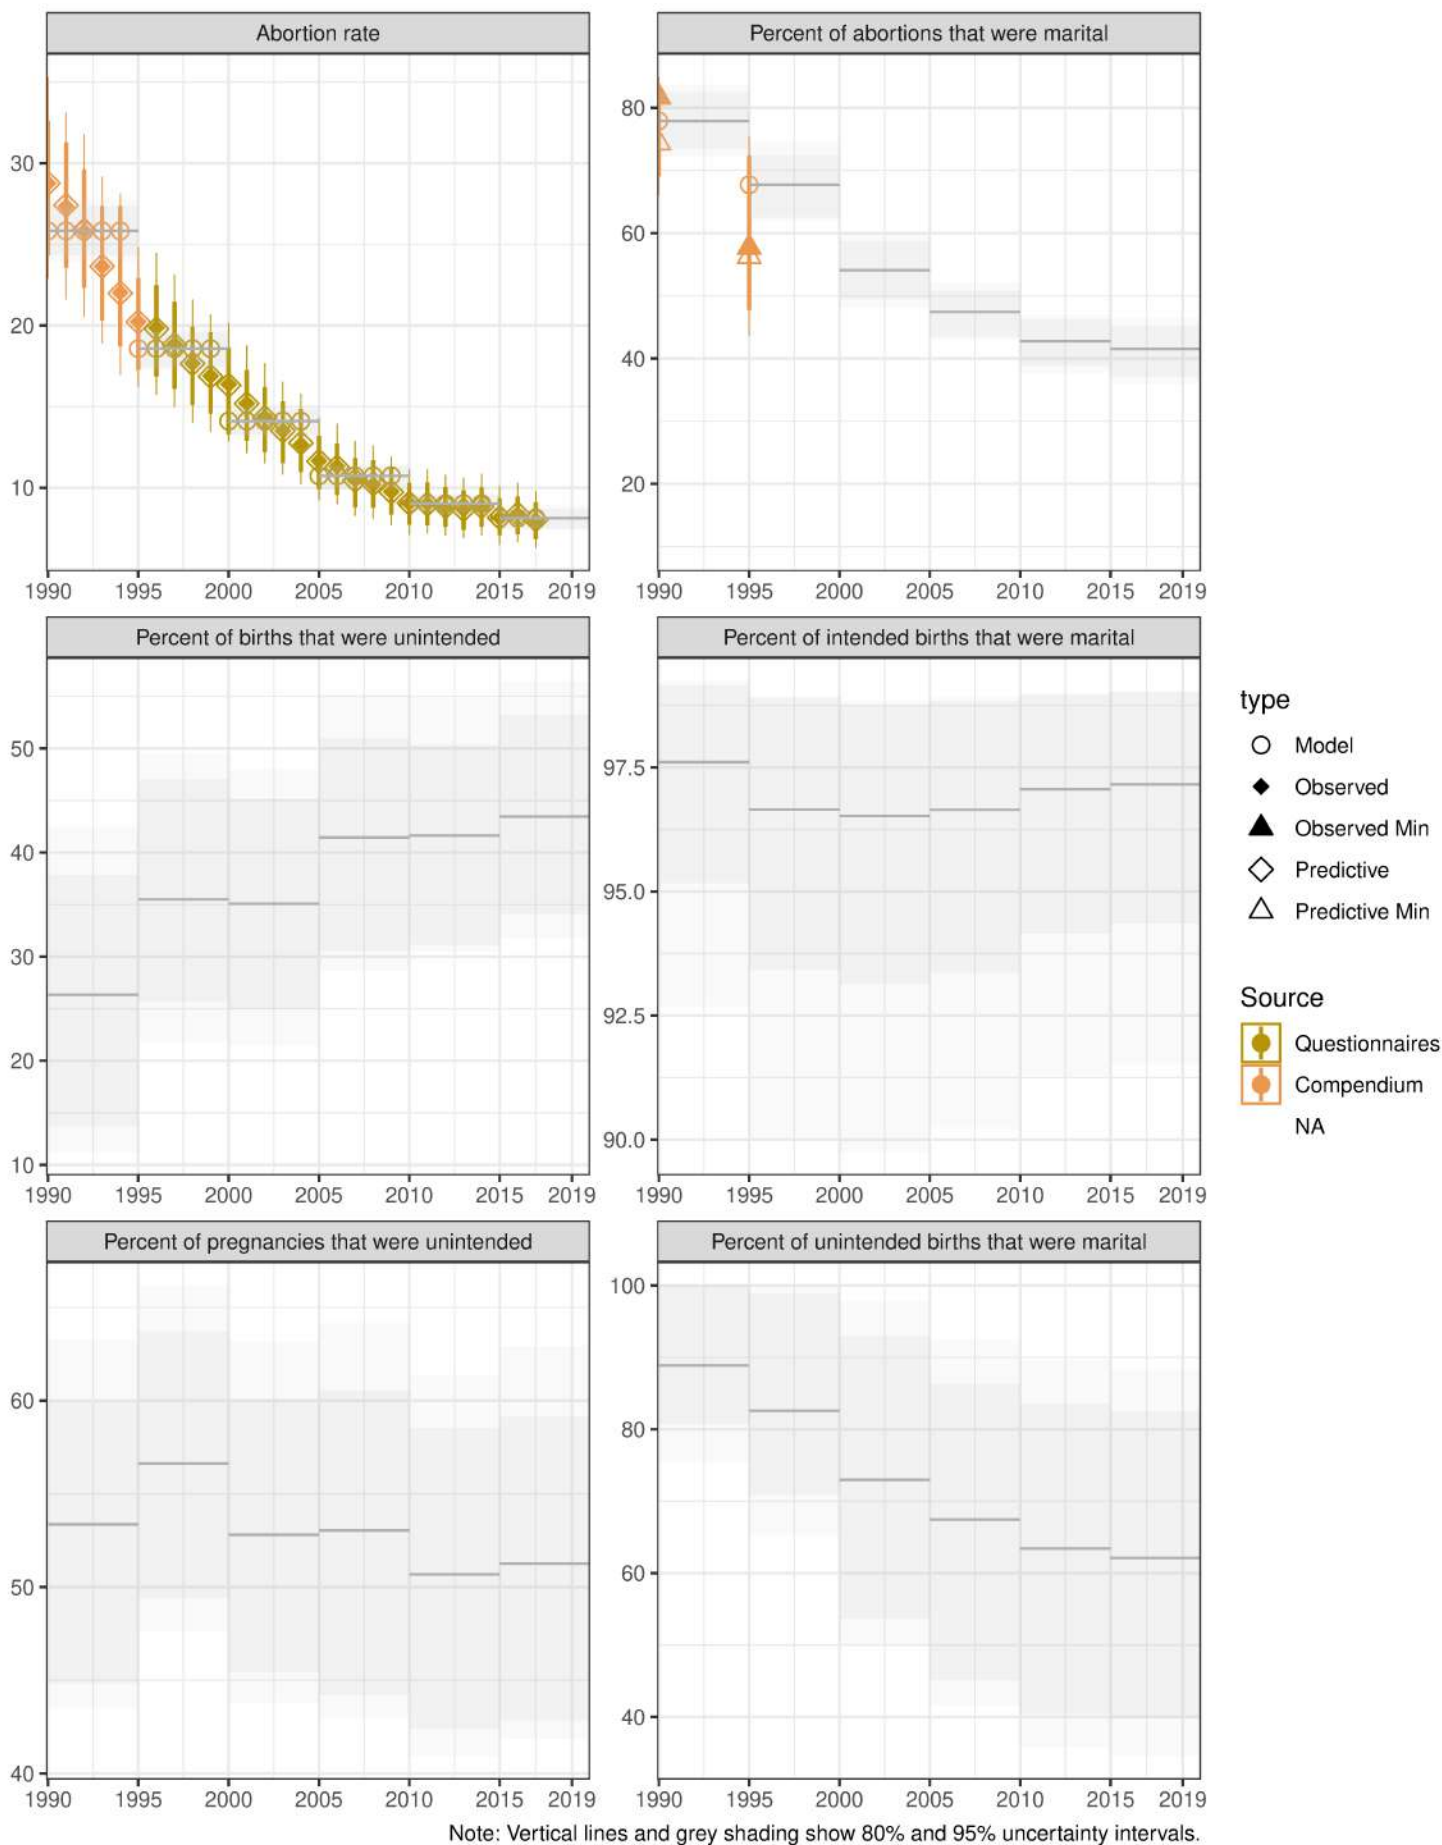

Note: Vertical lines and grey shading show 80% and 95% uncertainty intervals.

Spain

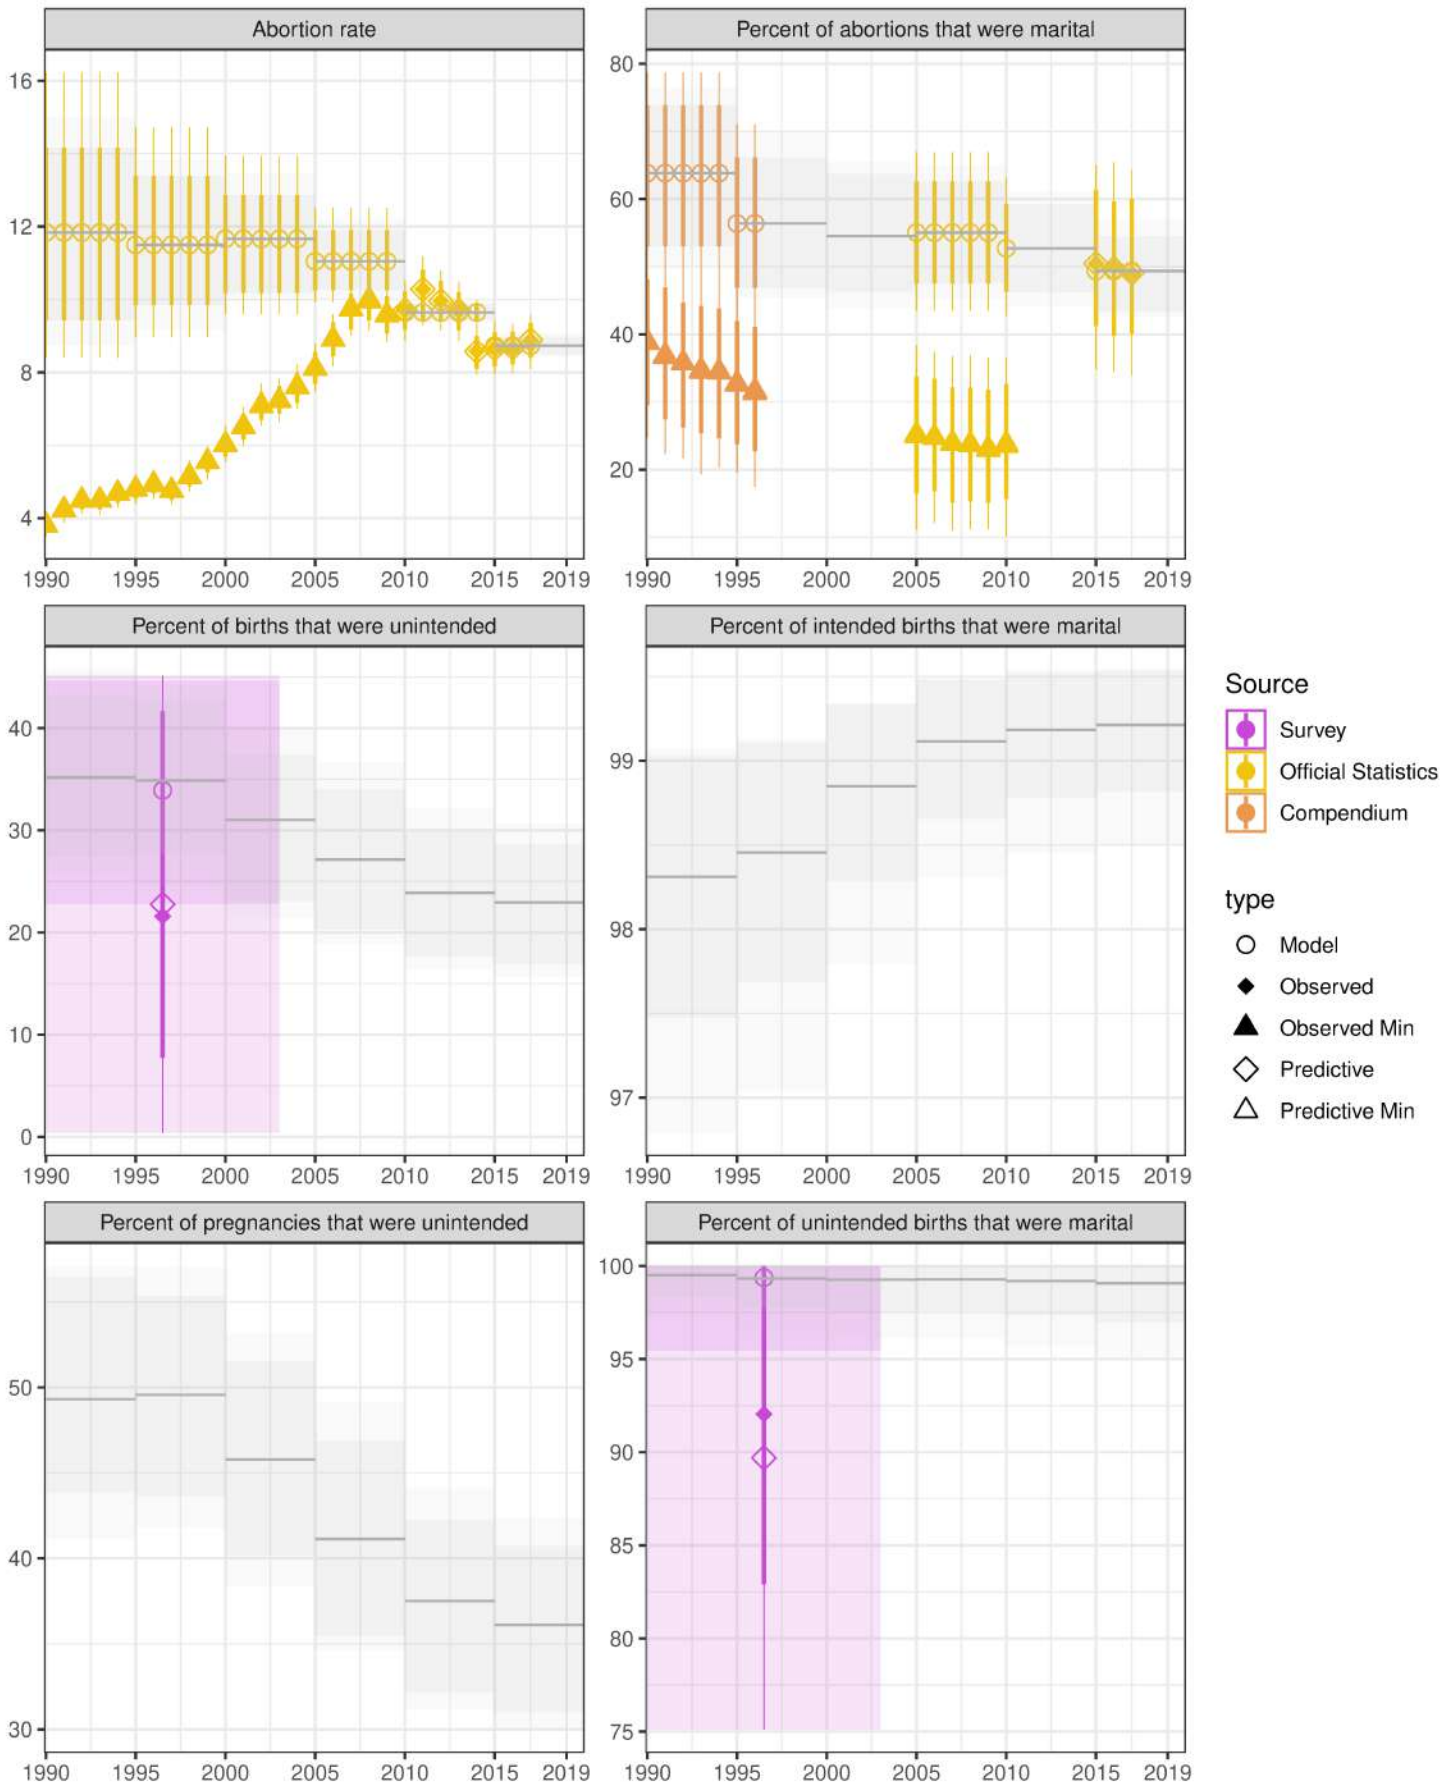

Note: Vertical lines and grey shading show 80% and 95% uncertainty intervals. Color shading shows when data were collected, if more than one year.

## 7.4 Western Europe

### Belgium

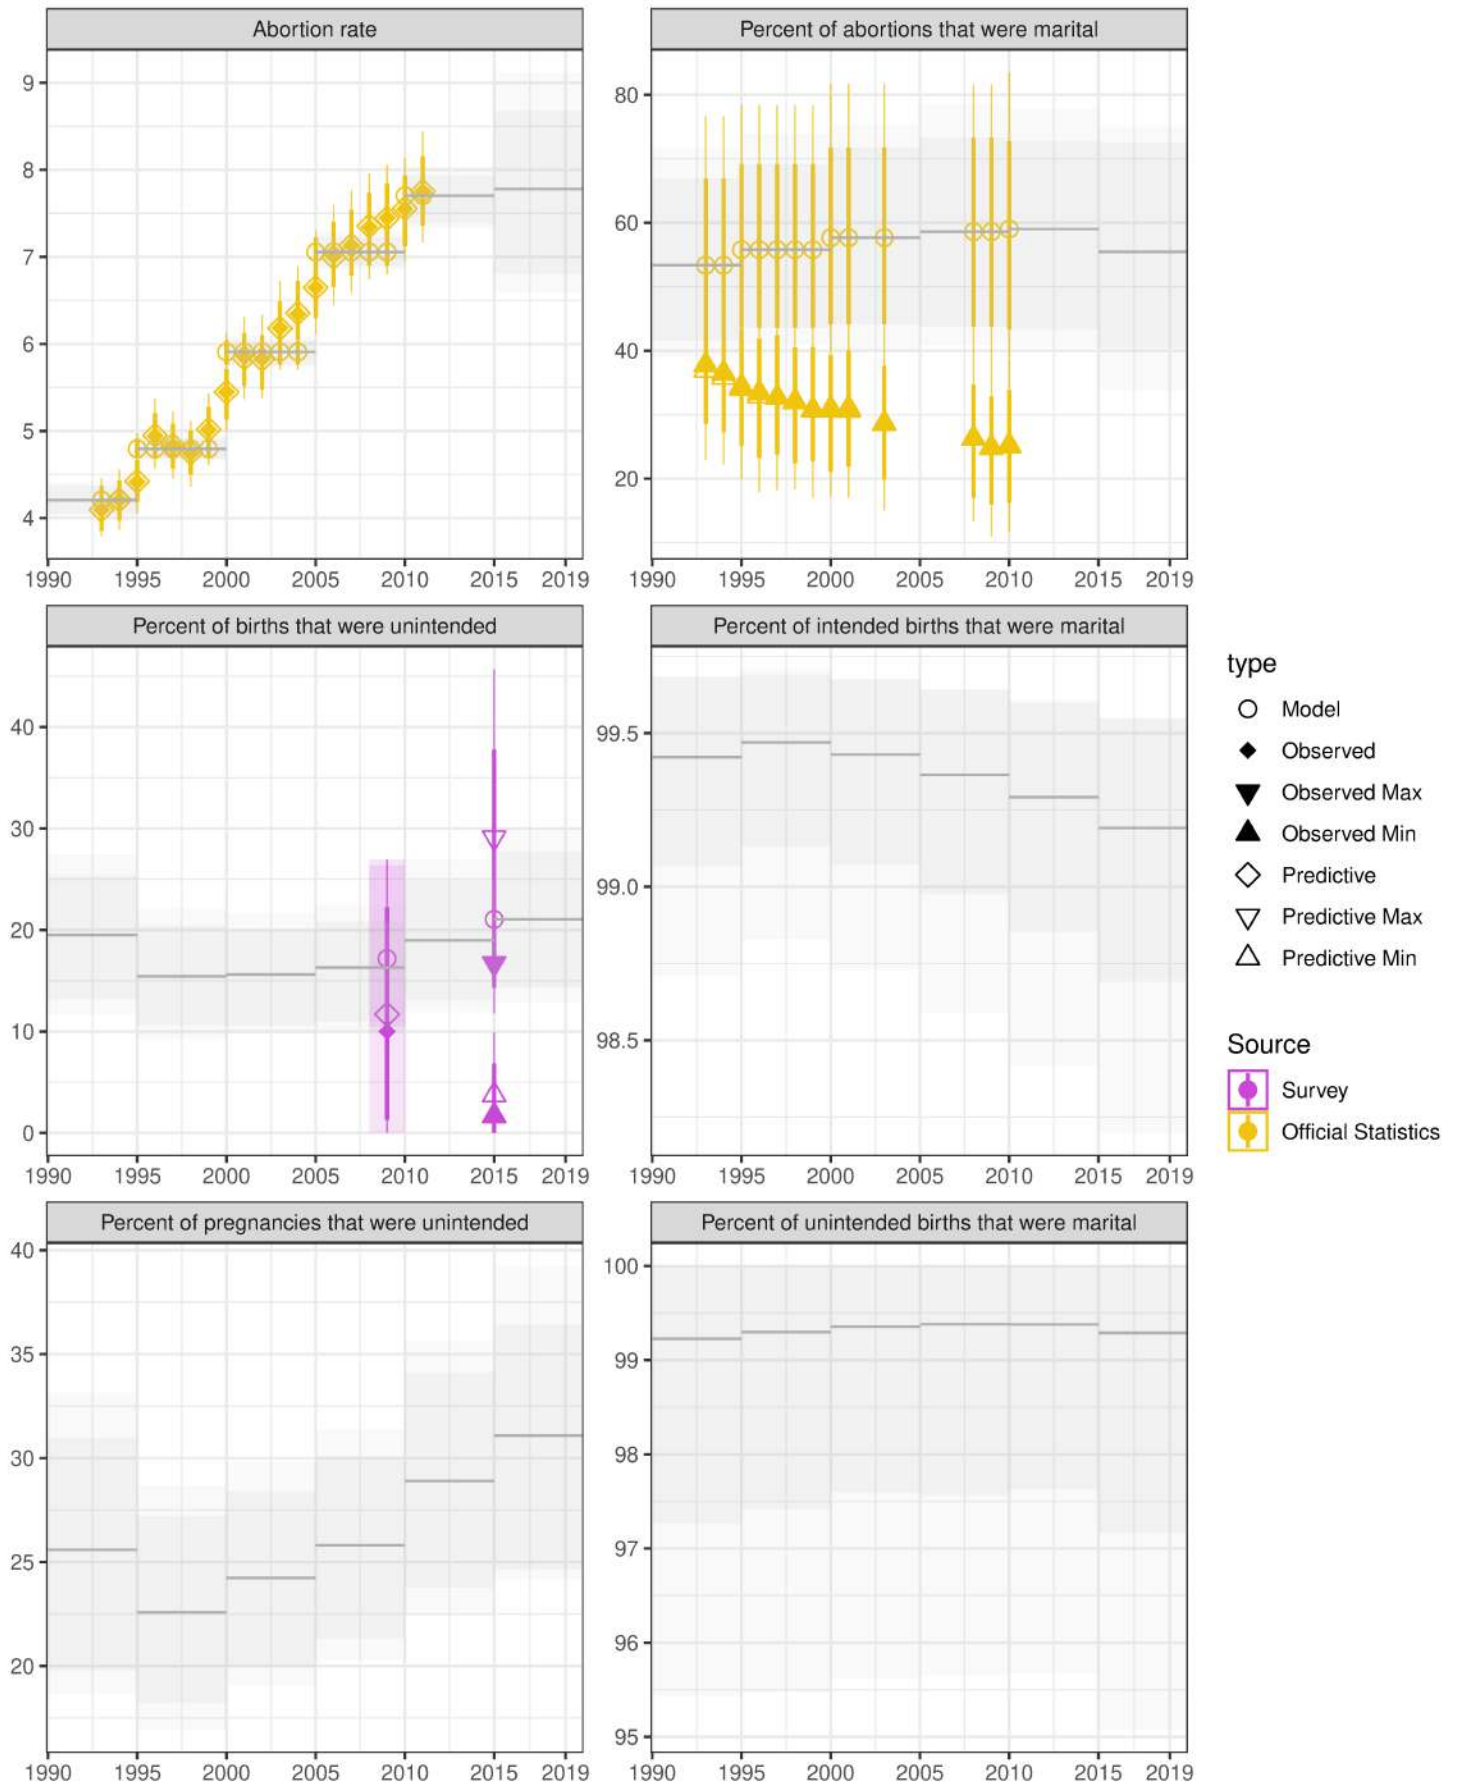

Note: Vertical lines and grey shading show 80% and 95% uncertainty intervals. Color shading shows when data were collected, if more than one year.

### France

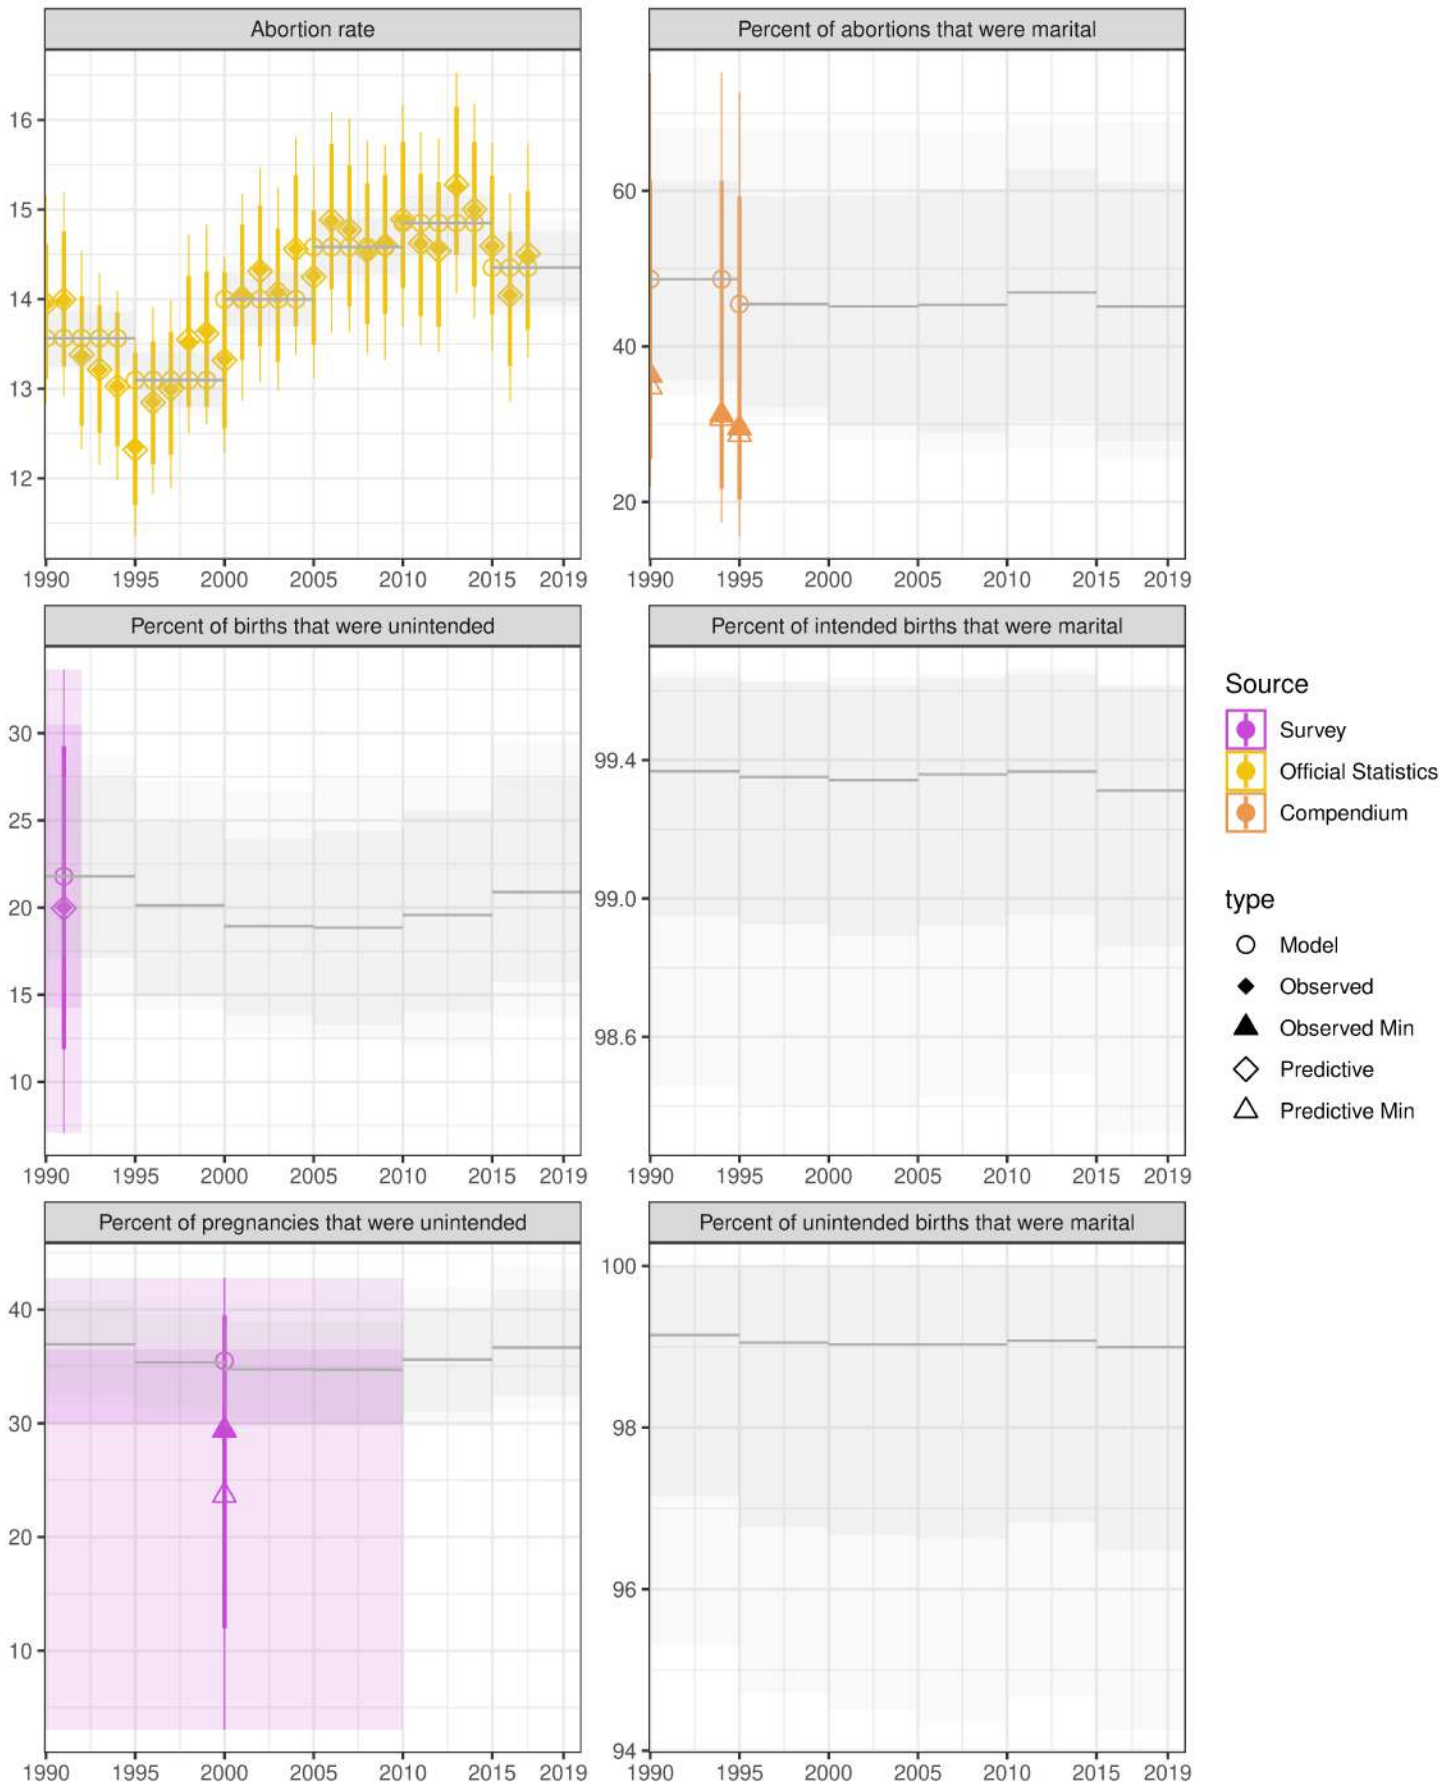

Note: Vertical lines and grey shading show 80% and 95% uncertainty intervals. Color shading shows when data were collected, if more than one year.

### Germany

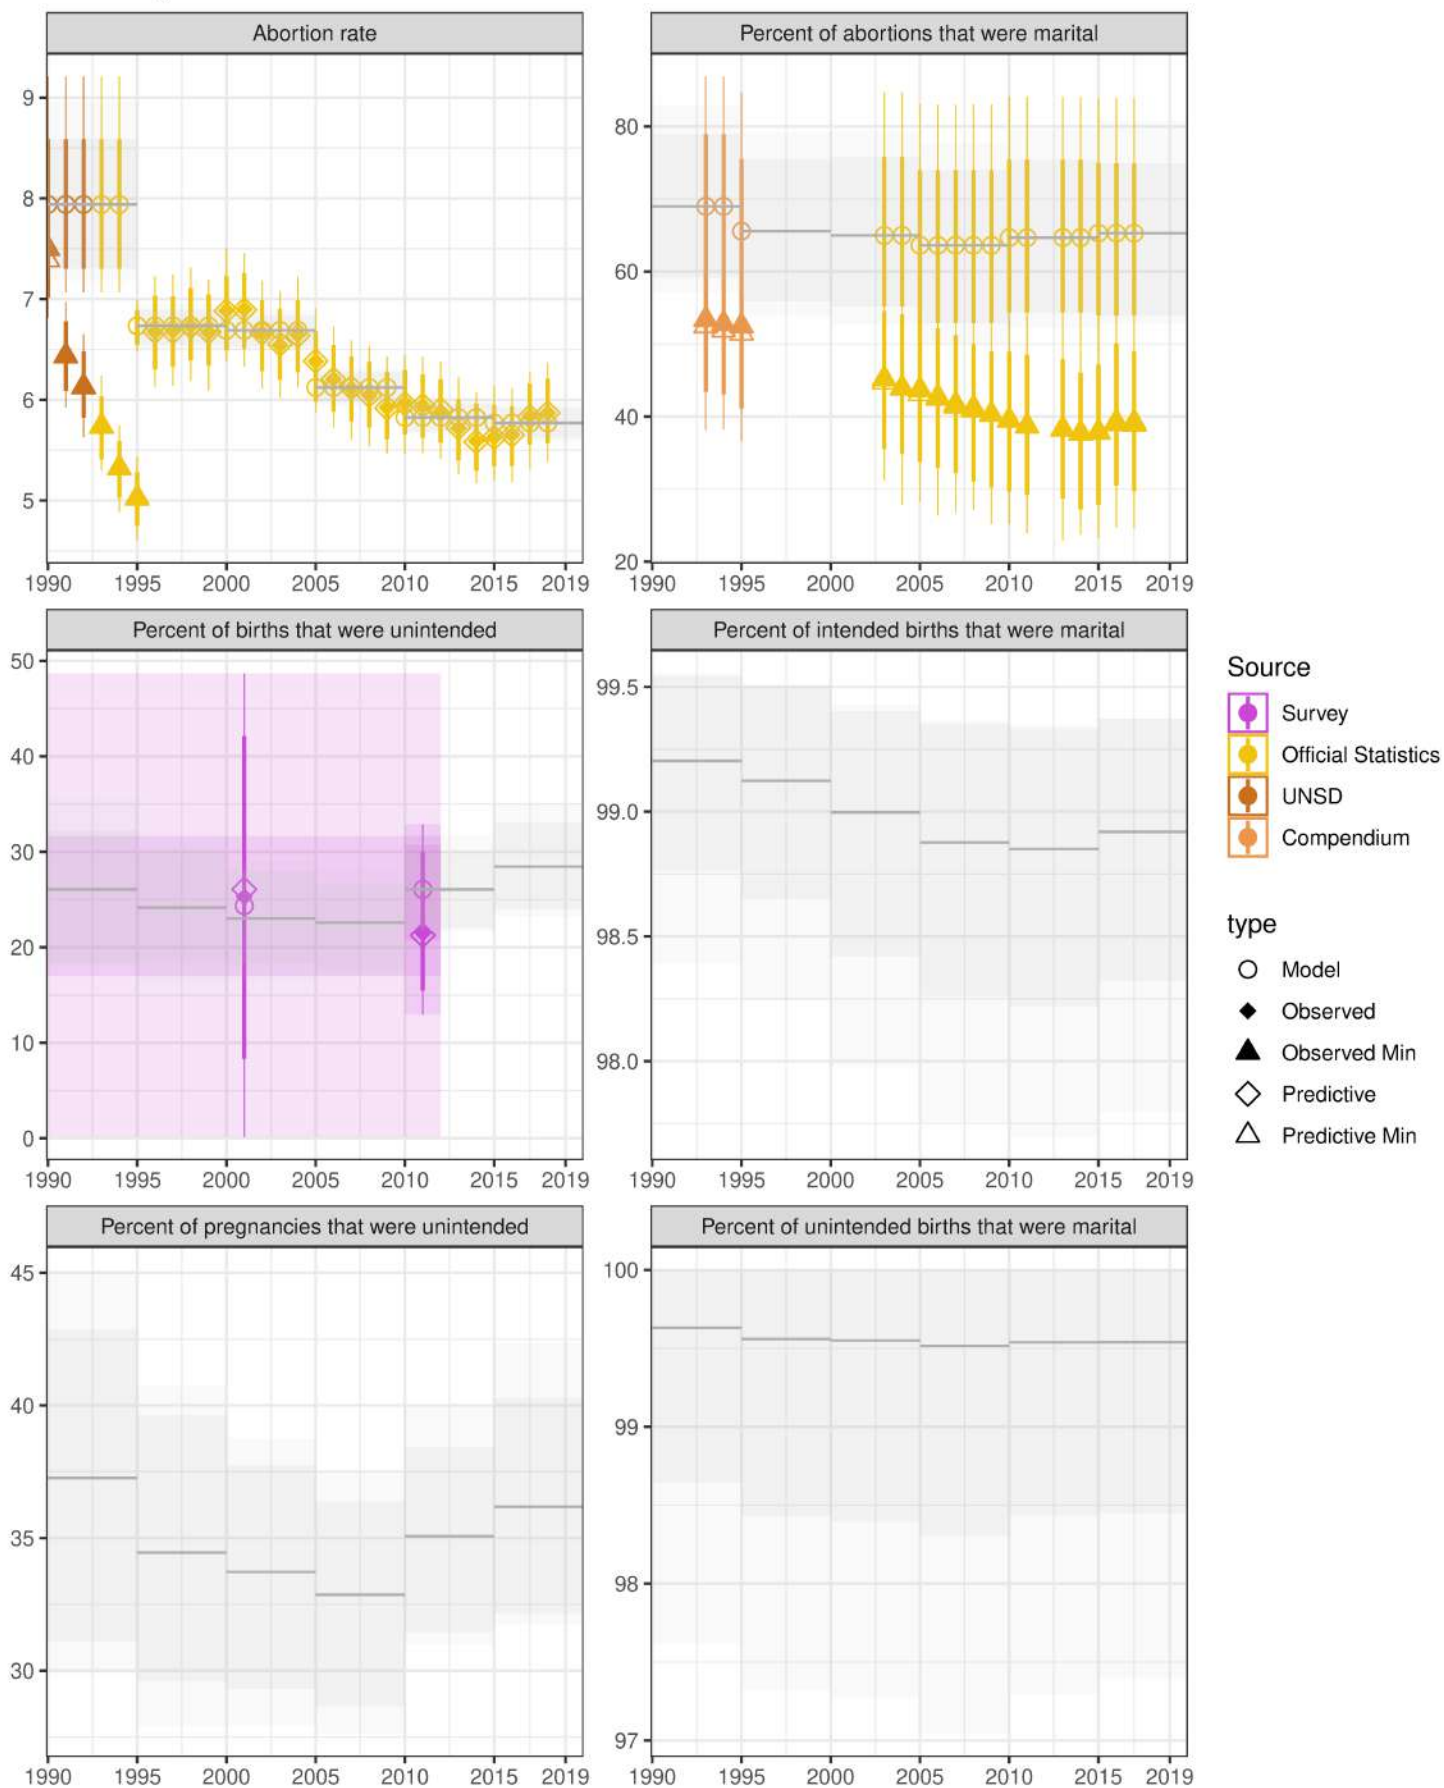

Note: Vertical lines and grey shading show 80% and 95% uncertainty intervals. Color shading shows when data were collected, if more than one year.

### Netherlands

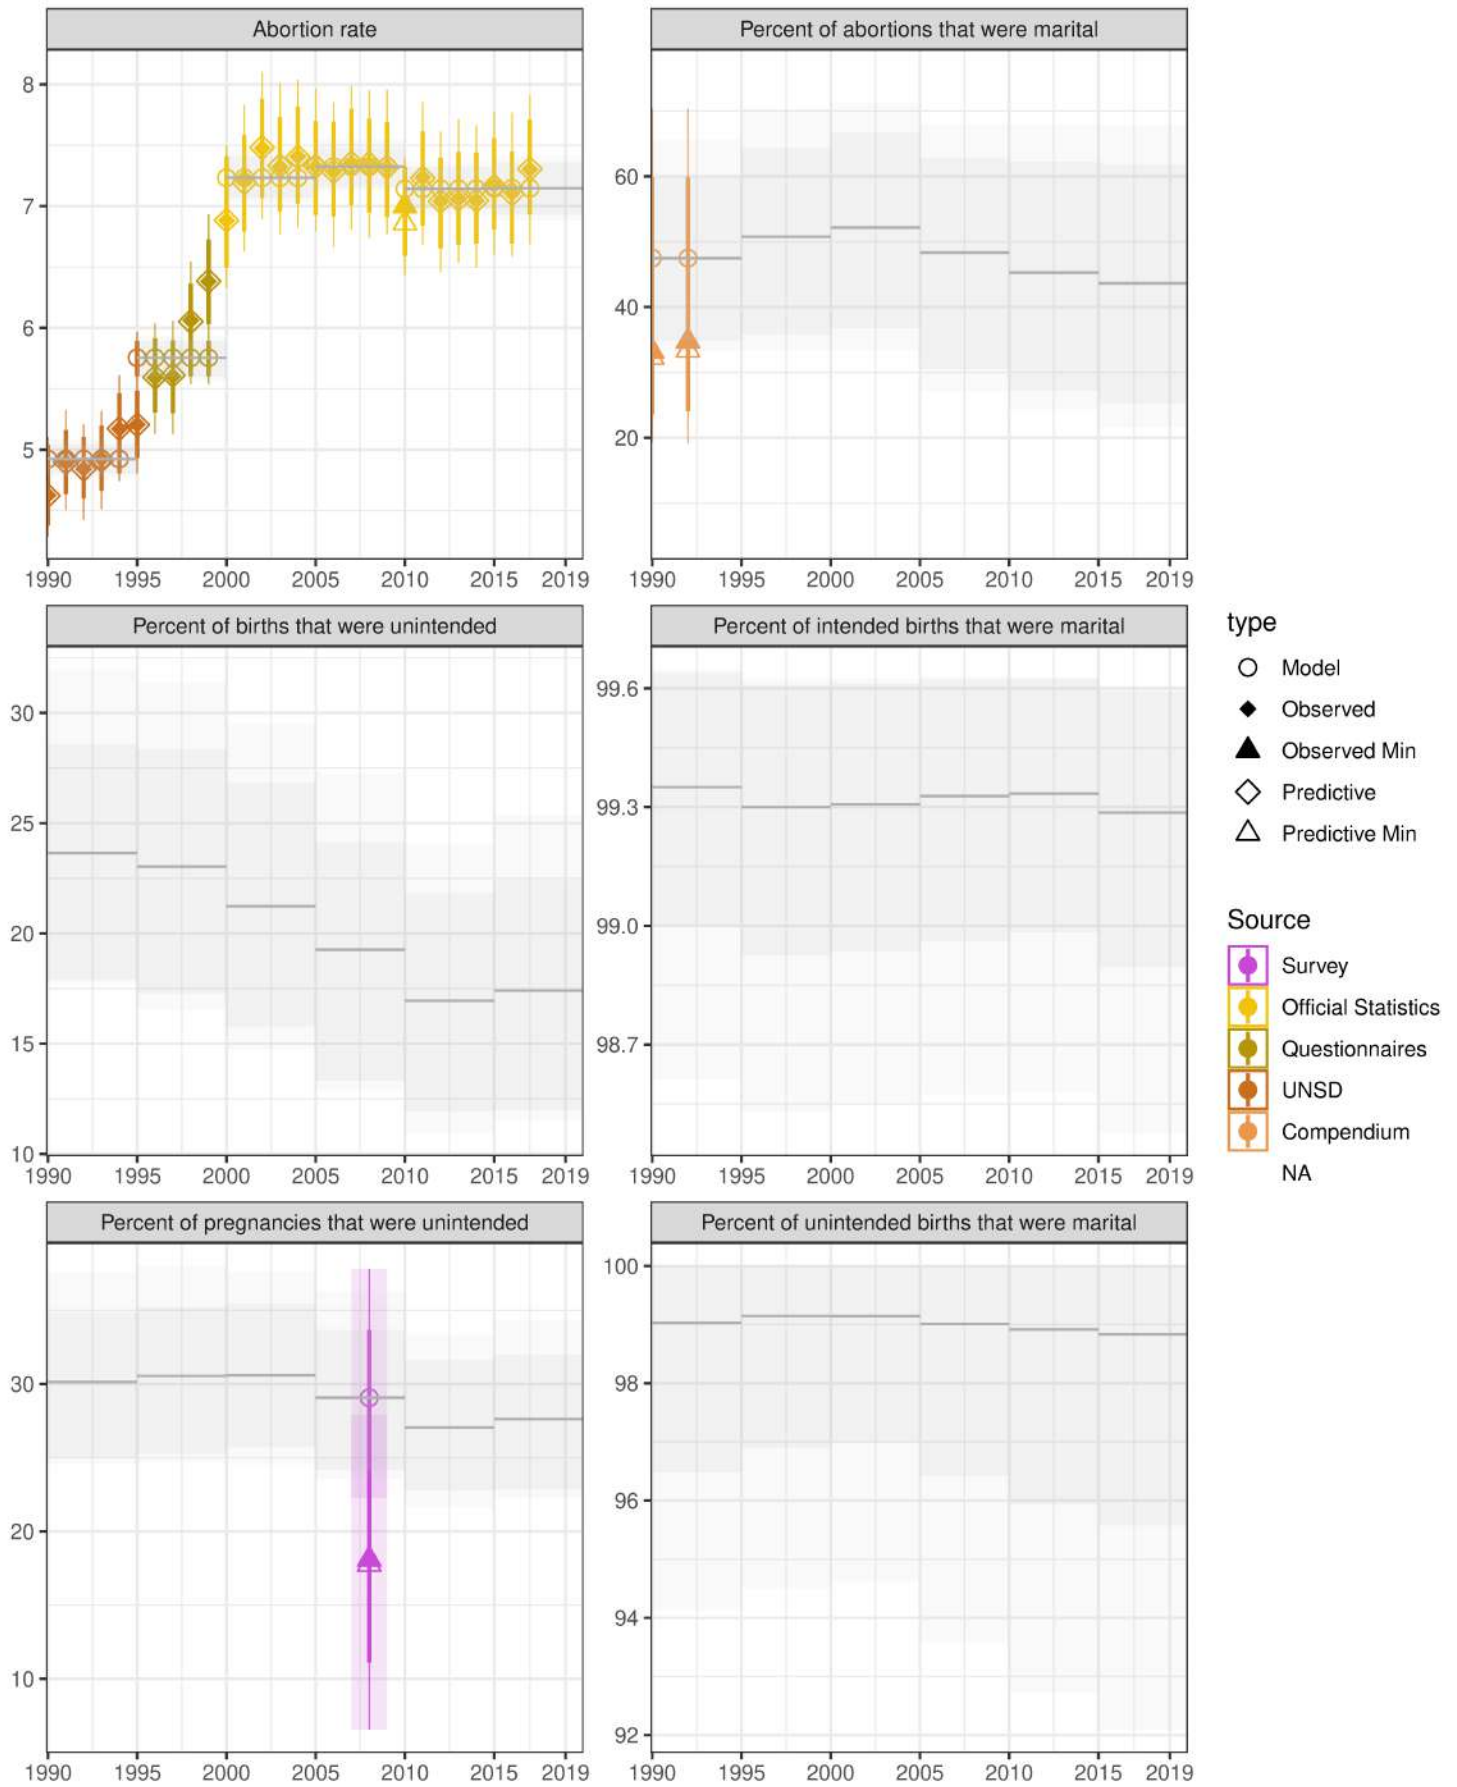

Note: Vertical lines and grey shading show 80% and 95% uncertainty intervals. Color shading shows when data were collected, if more than one year.

# Switzerland

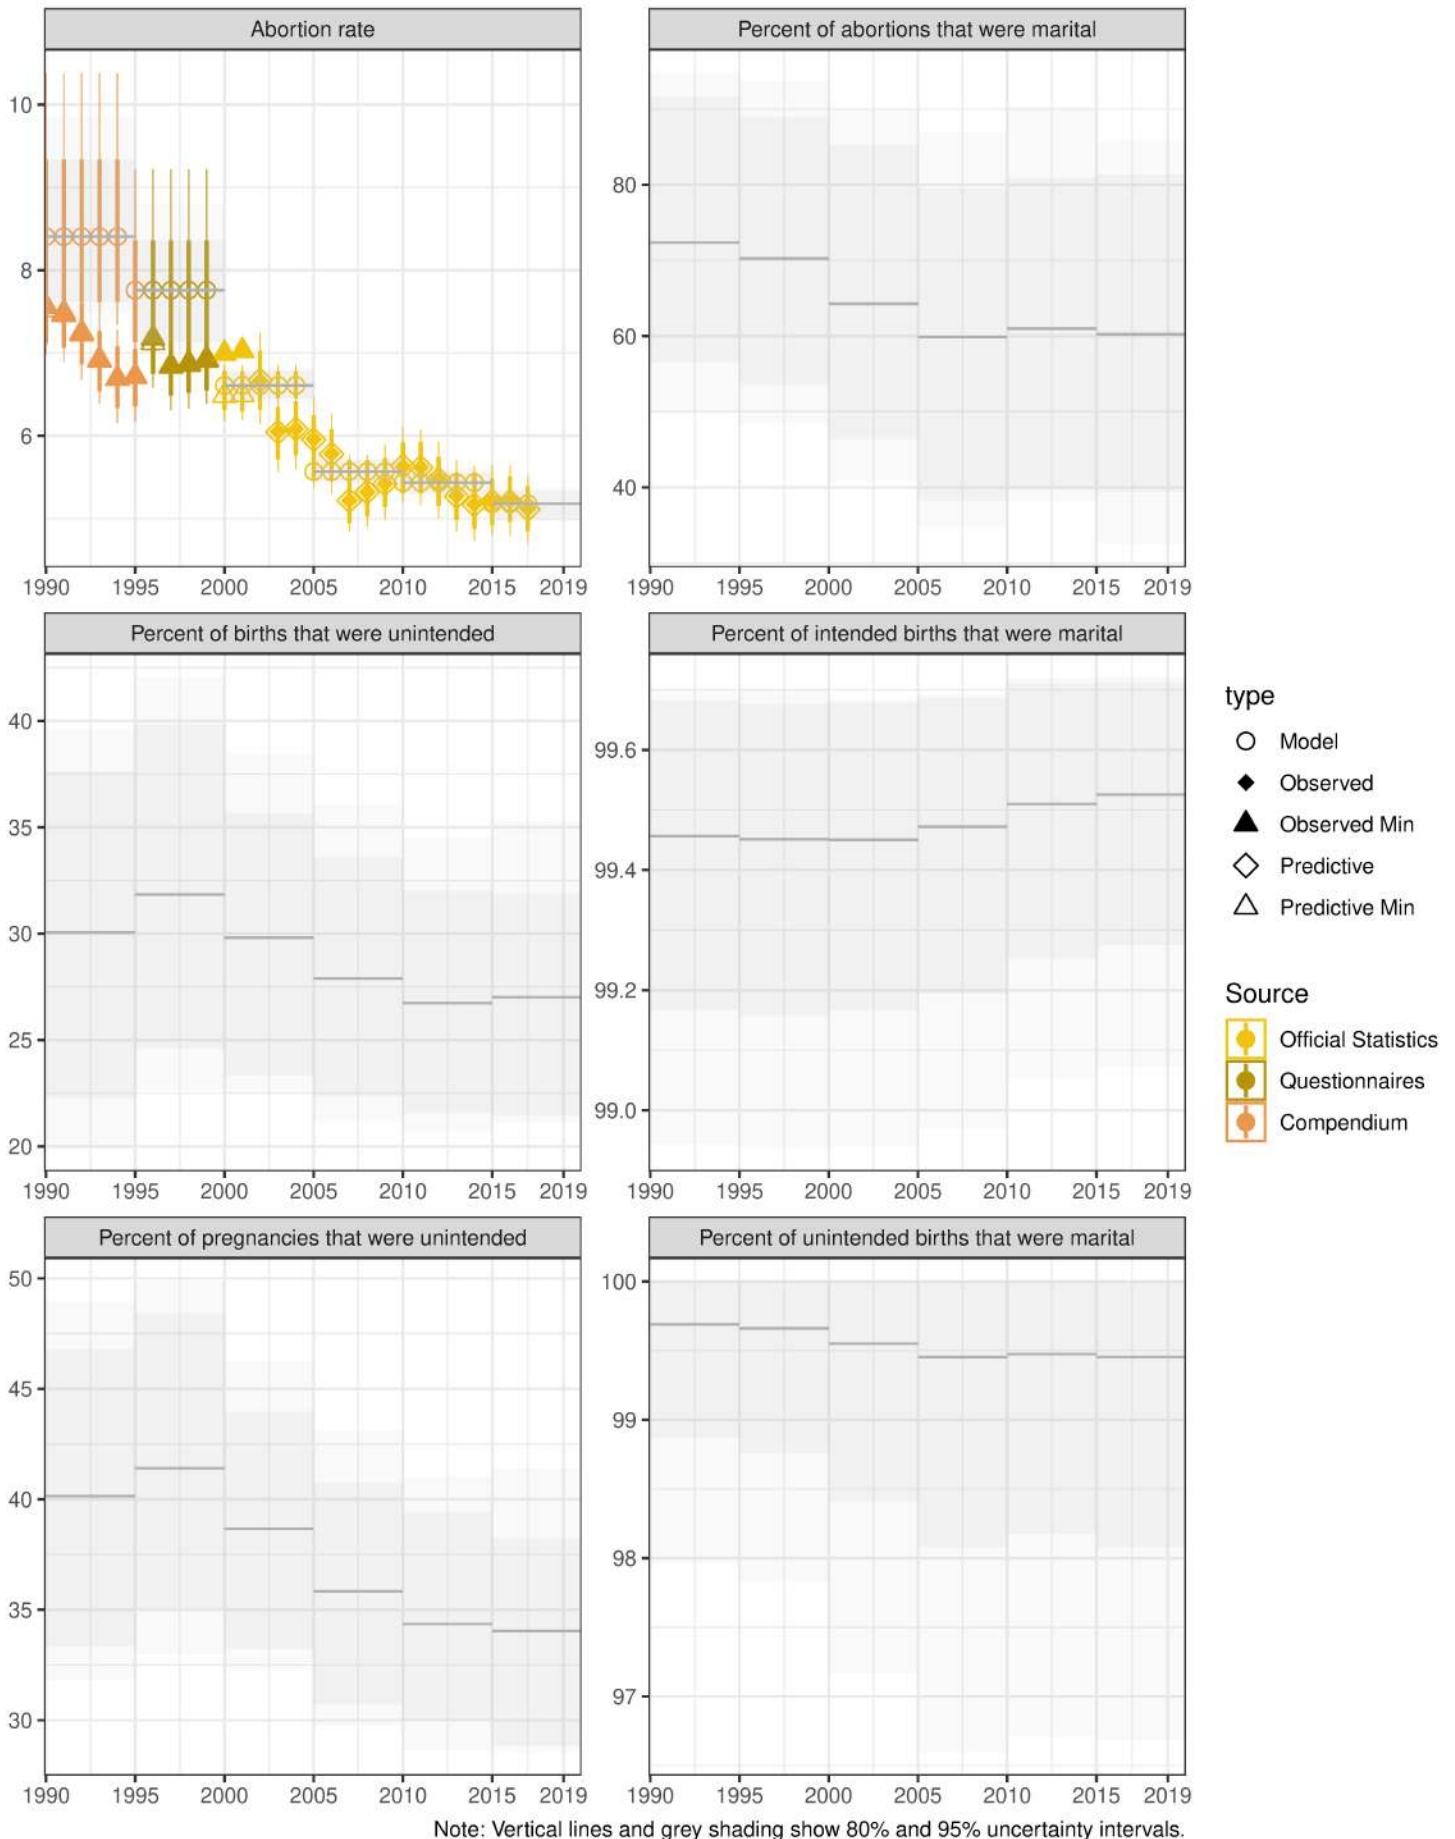



## 7.5 Northern America

### Canada

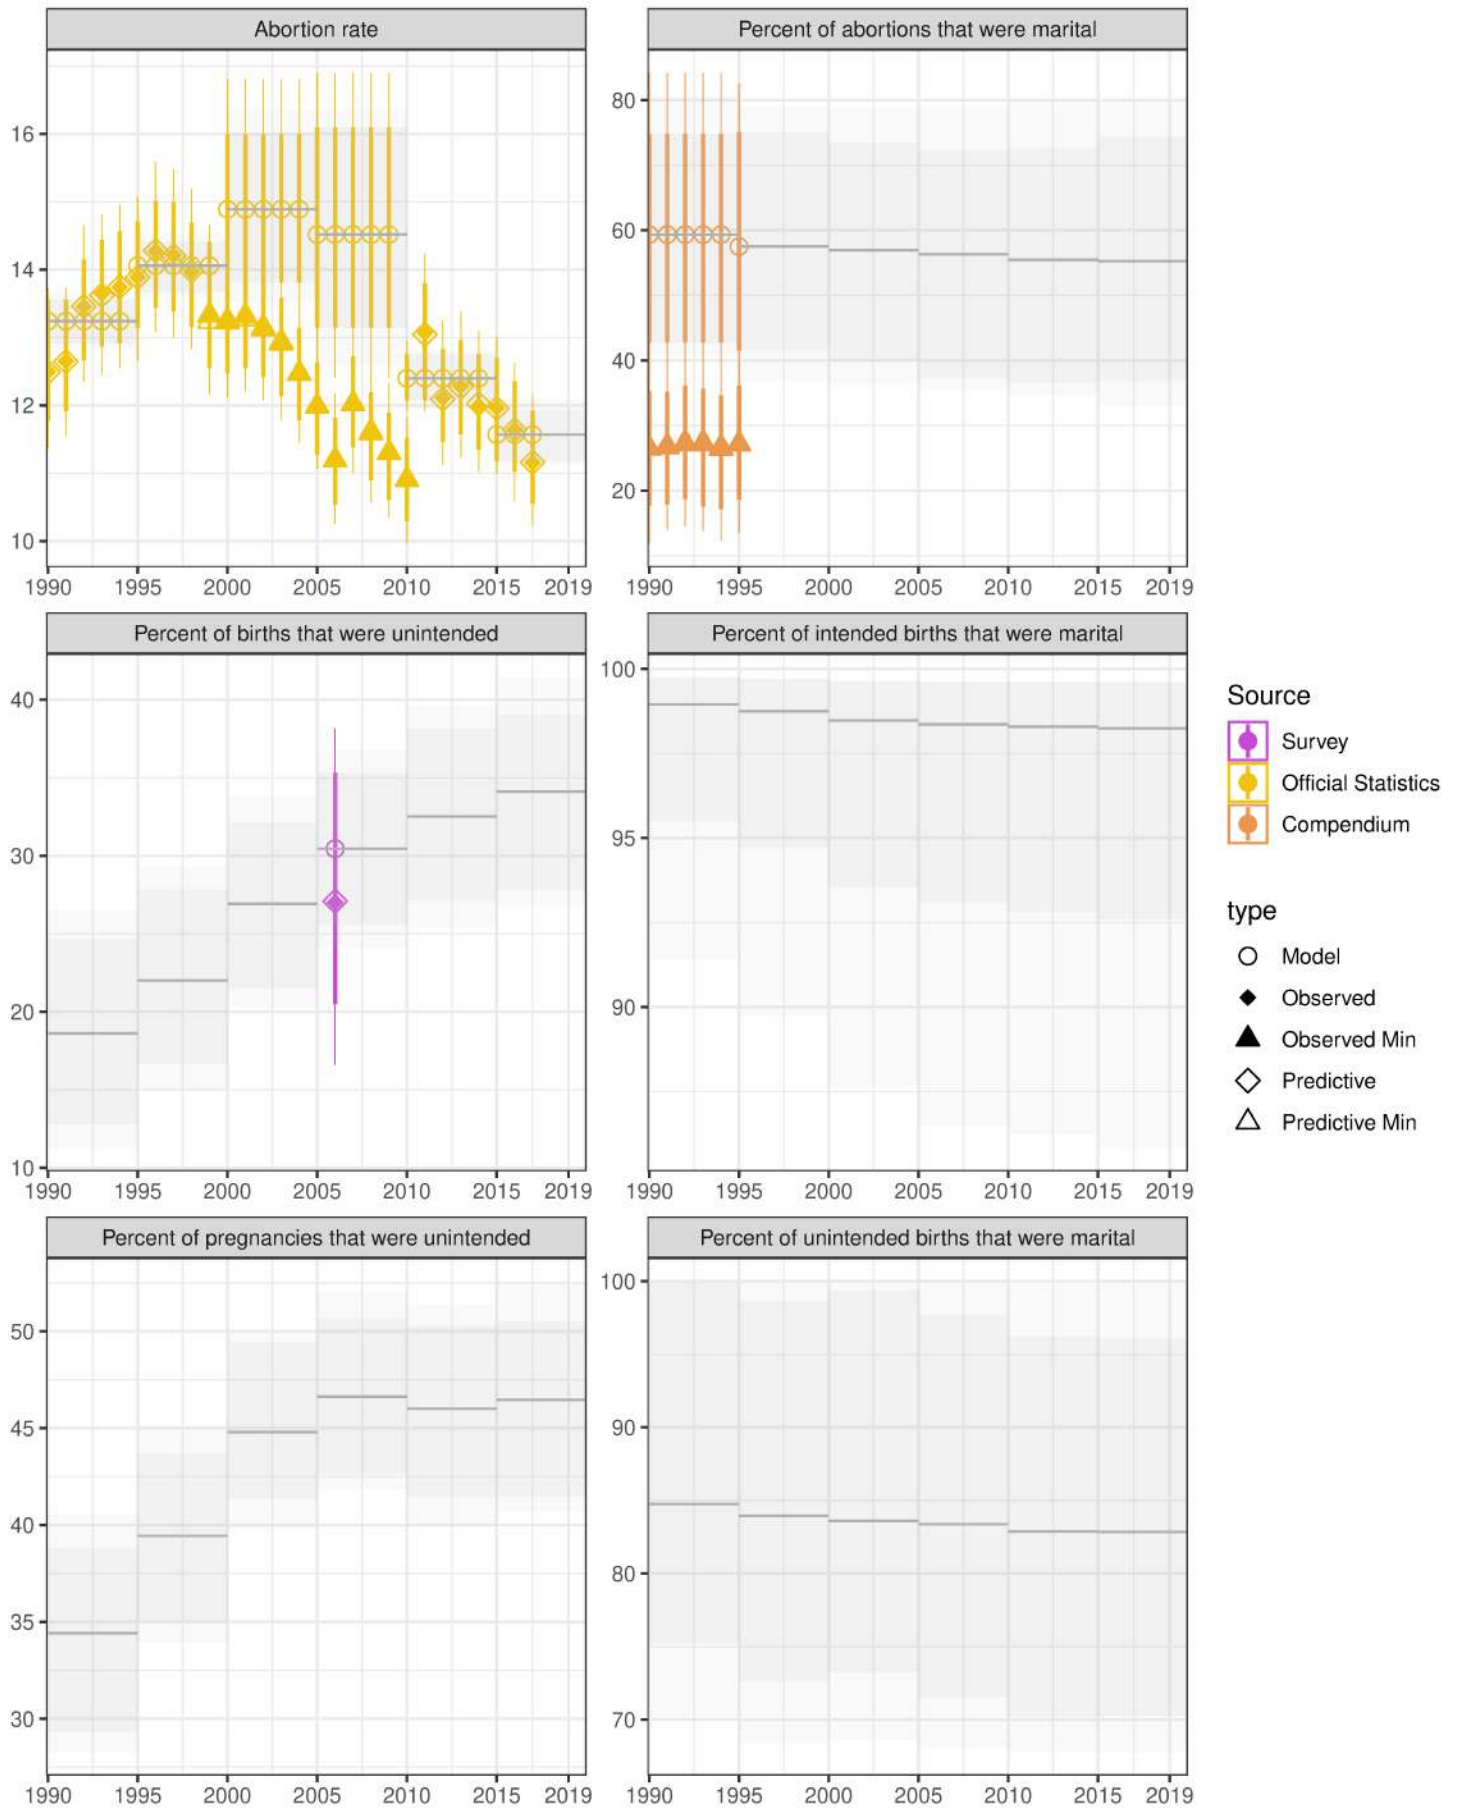

Note: Vertical lines and grey shading show 80% and 95% uncertainty intervals.

### United States

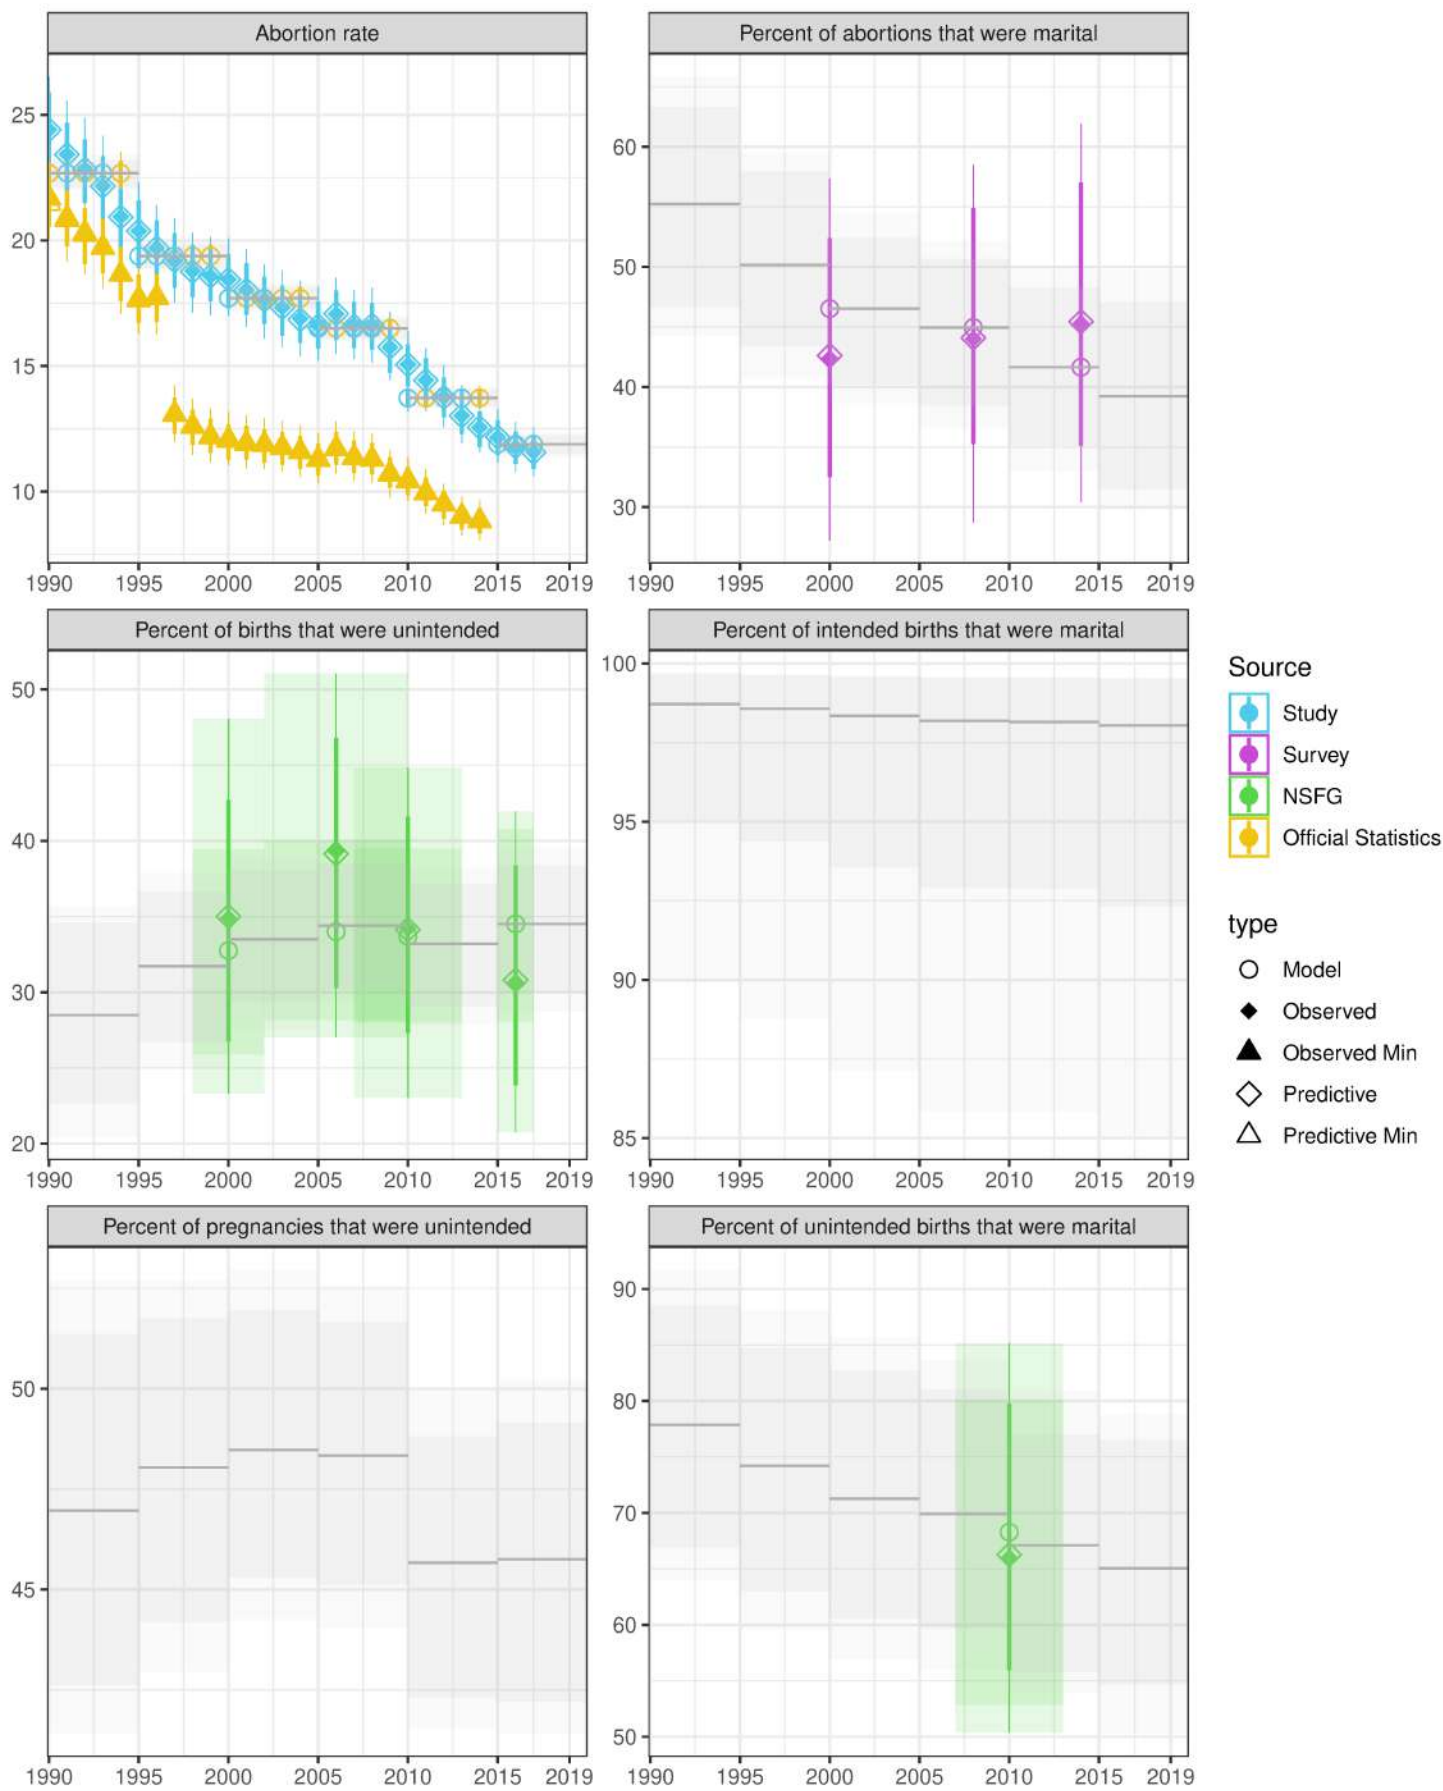

Note: Vertical lines and grey shading show 80% and 95% uncertainty intervals. Color shading shows when data were collected, if more than one year.
